# Supplementary material for: iCodon: ideal codon design for customized gene expression
Source: Research Square preprint supplement (doi:10.21203/rs.3.rs-598844/v1), 2021-06-21
Supplement: Supplementary file 1 [file 296363839c9cba32010d1bcd.docx]

User manual for the iCodon R package

4/30/2021

The [iCodon R package](https://github.com/santiago1234/iCodon) is a complement to the [iCodon web application](https://bazzinilab.shinyapps.io/icodon/).

## Installation

The iCodon package is available on [GitHub](https://github.com/santiago1234/iCodon).

Requirements

- R (>= 3.6.0)
- devtools

To install iCodon you first need to install the [devtools](https://github.com/r-lib/devtools) package. Once devtools is installed, start a new R session and enter:

devtools::install_github("santiago1234/iCodon")

## What does this package do?

This package does two things:

1. Predicts mRNA stability based on the codon composition for vertebrate species.
2. Optimizes or deoptimizes mRNA stability with synonymous codons substitutions.

# Prediction of mRNA stability based on the codon composition for vertebrates species

library(iCodon) # once iCodon is intalled correctly

You can use the function predict_stability to generate a predictor function for a given species. This function implements the mRNA stability predictor model described in [Medina-Muñoz *et al.,* 2021](https://doi.org/10.1186/s13059-020-02251-5).

To generate the predictor function, you need to specify a species. Possible species are:

- *Homo sapiens* (human)
- *Mus musculus* (mouse)
- *Danio rerio* (fish)
- *Xenopus laevis* (xenopus)

NOTE: If you wish to predict the mRNA stability for a species not present here, we recommend to choose the closest relative.

# example to predict stability in human
predictor_human <- predict_stability("human")

# now we can pass any coding sequence to the function
a_coding_sequence <- "ATGGATCGTGGTCAGCATCCTCCTGGGTGGGCCTGGCAGTGGCTTTCCTCGCATCCAGCAACTCTTCACCAGCTGGAGTGCAGTGGTGCAATCTCGGTTCACTGCAACCTCTACCTCCTGGGTTCAAGCGATTCTAGTGCCCCAGCCTCCCGAGTAGCTGAGACTACAGGTCCAGAGAGCTCGGTGACTGCAGCGCCACGGGCCAGGAAGTACAAGTGTGGCCTGCCCCAGCCGTGTCCTGAGGAGCACCTGGCCTTCCGCGTGGTCAGCGGGGCCGCCAACGTCATTGGGCCCAAGATCTGCCTCGAGGACAAGATGCTGATGAGCAGCGTCAAGGACAACGTGGGCCGCGGGCTGAACATCGCCCTGGTGAACGGGGTCAGCGGCGAGCTCATCGAGGCCCGGGCCTTTGACATGTGGGCCGGAGATGTCAACGACCTGTTGAAGTTTATTCGGCCACTGCACGAAGGCACCCTGGTGTTCGTGGCATCCTACGACGACCCAGCCACCAAGATGAATGAAGAGACCAGAAAGCTCTTCAGTGAGCTGGGCAGCAGGAACGCCAAGGAGCTGGCCTTCCGGGACAGCTGGGTGTTTGTCGGGGCCAAGGGTGTGCAGAACAAGAGCCCCTTTGAGCAGCACGTGAAGAACAGTAAGCACAGCAACAAGTACGAAGGCTGGCCCGAGGCGCTGGAGATGGAAGGCTGTATCCCGCGGAGAAGCACGGCCAGCTAG"

predictor_human(a_coding_sequence)
## [1] 0.001151879

When you pass a sequence to the function, the sequence must satisfy the following criteria:

- Sequence is in uppercase.
- The only valid characters are *A*, *C*, *G*, and *T*. If you pass another character you will get an incorrect (non-sense) result.
- Sequence length is a multiple of 3.
- This prediction is only valid for coding-DNA sequences (contain a start and stop codon in frame).

### Interpretation of predicted value

What does the value *0.0011519* mean? The predicted values are a scaled version of the mRNA decay rate. Negative values correspond to unstable mRNAs, positive values to stable mRNAs, and values close to zero are mRNAs with intermediate stability. Around 98% of the endogenous mRNAs predicted scores are within the range of [-1.5, 1.5] (see [Medina-Muñoz *et al.,* 2021](https://doi.org/10.1186/s13059-020-02251-5)). Also, figure 1D and E in this paper shows the predicted distribution of the human transcriptome.

### Predicting more than one sequence

If you wish to predict the stability for multiple sequences, you can pass a character vector containing the sequences to the predictor function. Consider the following example:

# for illustration purposes
a_set_of_sequences <- c("ATGATGCCC", "GGGTTTCCC", "ACTGTGGCC")
predictor_human(a_set_of_sequences)
## [1] 0.1228918 -0.3097580 -0.4472654

Note that iCodon will generate predictions for what you ask to predict, and these predictions can make non-sense biologically (e.g., a sequence consisting of only *T*s).

In the Supplemental Tables 1-4 of this paper, we provided precomputed predictions for the human, mouse, zebrafish, and *Xenopus* transciptomes.

# Optimization or deoptimization of mRNA stability with synonymous codons substitutions

To optimize mRNA stability use the function optimizer. This function takes a DNA sequence, a species, and a set of parameters that control the optimization process. See the Methods section in this paper for a detailed explanation of how the algorithm works.

| sequence_to_optimize | character, coding DNA sequence from start codon to stop codon |
| --- | --- |
| specie | character, vertebrate species (human, mouse, zebrafish, or *Xenopus*) |
| n_iterations | integer, number of evolution iterations (10 by default) |
| make_more_optimal | logical, if true the sequence is optimized, if false the sequence is deoptimized |
| mutation_Rate | numeric, number of mutations to introduce at each iteration given as a probability (1 = max (mutate all positions), 0 = min (no mutations)) |
| max_abs_val | A maximum value (absolute value) such that the sequences cannot go beyond that value. Infinite is used as default, in this case there is not a limit for the sequences. In our hands, a maximum of 1 works well. |
| n_Daughters | integer, number of child sequences to explore at each iteration. The algorithm will choose the fittest sequence based on the predicted mRNA stability. |

optimizer(a_coding_sequence,
 specie = "human",
 n_iterations = 5,
 make_more_optimal = F,
 mutation_Rate = .5,
 max_abs_val = 1,
 n_Daughters = 3)

| iteration | synonymous_seq | predicted_stability |
| --- | --- | --- |
| 0 | ATGGATCG… | 0.0011519 |
| 1 | ATGGATCG… | -0.7162493 |
| 2 | ATGGATCG… | -0.9327407 |
| 3 | ATGGATCG… | -0.9936948 |
| 4 | ATGGATCG… | -0.9936948 |
| 5 | ATGGATCG… | -0.9936948 |

We provide the function run_optimization_shinny that implements the optimization with the same parameters as in the [web application](https://bazzinilab.shinyapps.io/icodon/). In this case, you only need to provide the sequence to optimize and the species. Also, this function will run the optimization in both directions (optimized and deoptimized) and will add extra columns to the results table showing the number of mutations introduced in each iteration (codons and nucleotides).

run_optimization_shinny(a_coding_sequence, "human")

| iteration | synonymous_seq | predicted_stability | optimization | codons_change | nucleotides_change |
| --- | --- | --- | --- | --- | --- |
| 0 | ATGGATCG… | 0.0011519 | optimized | 0 | 0 |
| 1 | ATGGATCG… | 0.1440743 | optimized | 6 | 8 |
| 2 | ATGGATCG… | 0.2115658 | optimized | 13 | 16 |
| 3 | ATGGATCG… | 0.4065922 | optimized | 23 | 30 |
| 4 | ATGGATCG… | 0.5315651 | optimized | 33 | 44 |
| 5 | ATGGATCG… | 0.6180360 | optimized | 40 | 53 |
| 6 | ATGGATCG… | 0.7045403 | optimized | 46 | 58 |
| 7 | ATGGATCG… | 0.7899823 | optimized | 55 | 70 |
| 8 | ATGGATCG… | 0.8910819 | optimized | 60 | 78 |
| 9 | ATGGATCG… | 0.9648229 | optimized | 64 | 82 |
| 10 | ATGGATCG… | 0.9648229 | optimized | 64 | 82 |
| 0 | ATGGATCG… | 0.0011519 | deoptimized | 0 | 0 |
| 1 | ATGGATCG… | -0.1866689 | deoptimized | 7 | 9 |
| 2 | ATGGATCG… | -0.3636166 | deoptimized | 17 | 20 |
| 3 | ATGGATCG… | -0.5396171 | deoptimized | 24 | 30 |
| 4 | ATGGATCG… | -0.6969228 | deoptimized | 32 | 41 |
| 5 | ATGGATCG… | -0.7519579 | deoptimized | 38 | 48 |
| 6 | ATGGATCG… | -0.8695678 | deoptimized | 44 | 56 |
| 7 | ATGGATCG… | -0.9546294 | deoptimized | 51 | 66 |
| 8 | ATGGATCG… | -0.9546294 | deoptimized | 51 | 66 |
| 9 | ATGGATCG… | -0.9546294 | deoptimized | 51 | 66 |
| 10 | ATGGATCG… | -0.9546294 | deoptimized | 51 | 66 |

### Citation

If you use iCodon in your research, please cite the following papers:

- Medina-Muñoz, S. G., Kushawah, G., Castellano, L. A., Diez, M., DeVore, M. L., Salazar, M. J. B., & Bazzini, A. A. (2021). Crosstalk between codon optimality and cis-regulatory elements dictates mRNA stability. Genome biology, 22(1), 1-23.
- Medina-Muñoz … iCodon paper
