# Supplementary material for: iCodon: ideal codon design for customized gene expression
Source: Research Square preprint supplement (doi:10.21203/rs.3.rs-598844/v1), 2021-06-21
Supplement: Supplementary file 2 [file 58242cf34f28335122d67bcd.csv]

GO term	Description	P-value	FDR q-value	Enrichment (N, B, n, b)	Type
GO:1900118	negative regulation of execution phase of apoptosis	4.69E-14	7.03E-10	125.82 (16392,16,57,7)	Top 100 Optimal
GO:1900117	regulation of execution phase of apoptosis	8.03E-12	6.03E-08	67.10 (16392,30,57,7)	Top 100 Optimal
GO:2000272	negative regulation of signaling receptor activity	3.74E-10	0.00000187	40.26 (16392,50,57,7)	Top 100 Optimal
GO:0006412	translation	7.25E-08	0.000272	14.47 (16392,159,57,8)	Top 100 Optimal
GO:0006614	SRP-dependent cotranslational protein targeting to membrane	7.87E-08	0.000236	27.39 (16392,63,57,6)	Top 100 Optimal
GO:0006613	cotranslational protein targeting to membrane	0.000000137	0.000342	25.01 (16392,69,57,6)	Top 100 Optimal
GO:0043043	peptide biosynthetic process	0.000000166	0.000356	13.00 (16392,177,57,8)	Top 100 Optimal
GO:0045047	protein targeting to ER	0.000000264	0.000496	22.41 (16392,77,57,6)	Top 100 Optimal
GO:0072599	establishment of protein localization to endoplasmic reticulum	0.000000358	0.000597	21.30 (16392,81,57,6)	Top 100 Optimal
GO:0000184	nuclear-transcribed mRNA catabolic process, nonsense-mediated decay	0.000000548	0.000823	19.83 (16392,87,57,6)	Top 100 Optimal
GO:0019083	viral transcription	0.000000587	0.000801	19.61 (16392,88,57,6)	Top 100 Optimal
GO:0070972	protein localization to endoplasmic reticulum	0.000000764	0.000956	18.76 (16392,92,57,6)	Top 100 Optimal
GO:0010469	regulation of signaling receptor activity	0.00000125	0.00144	12.66 (16392,159,57,7)	Top 100 Optimal
GO:0006413	translational initiation	0.00000149	0.00159	16.75 (16392,103,57,6)	Top 100 Optimal
GO:0006612	protein targeting to membrane	0.00000482	0.00482	13.69 (16392,126,57,6)	Top 100 Optimal
GO:0002181	cytoplasmic translation	0.00000499	0.00468	34.86 (16392,33,57,4)	Top 100 Optimal
GO:0043604	amide biosynthetic process	0.00000679	0.00599	7.93 (16392,290,57,8)	Top 100 Optimal
GO:0006518	peptide metabolic process	0.00000732	0.0061	7.85 (16392,293,57,8)	Top 100 Optimal
GO:0030261	chromosome condensation	0.00000987	0.0078	29.50 (16392,39,57,4)	Top 100 Optimal
GO:0000956	nuclear-transcribed mRNA catabolic process	0.0000152	0.0114	11.20 (16392,154,57,6)	Top 100 Optimal
GO:0006323	DNA packaging	0.0000161	0.0115	26.14 (16392,44,57,4)	Top 100 Optimal
GO:0006402	mRNA catabolic process	0.0000276	0.0188	10.09 (16392,171,57,6)	Top 100 Optimal
GO:0006401	RNA catabolic process	0.0000662	0.0432	8.63 (16392,200,57,6)	Top 100 Optimal
GO:0090150	establishment of protein localization to membrane	0.000115	0.0718	7.81 (16392,221,57,6)	Top 100 Optimal
GO:0034655	nucleobase-containing compound catabolic process	0.000172	0.103	5.90 (16392,341,57,7)	Top 100 Optimal
GO:0072594	establishment of protein localization to organelle	0.000178	0.103	5.87 (16392,343,57,7)	Top 100 Optimal
GO:0044419	interspecies interaction between organisms	0.000261	0.145	3.78 (16392,761,57,10)	Top 100 Optimal
GO:0009060	aerobic respiration	0.000285	0.153	23.32 (16392,37,57,3)	Top 100 Optimal
GO:0046700	heterocycle catabolic process	0.000359	0.186	5.23 (16392,385,57,7)	Top 100 Optimal
GO:0044270	cellular nitrogen compound catabolic process	0.000365	0.182	5.22 (16392,386,57,7)	Top 100 Optimal
GO:0006605	protein targeting	0.000367	0.178	6.30 (16392,274,57,6)	Top 100 Optimal
GO:0019730	antimicrobial humoral response	0.000372	0.175	11.74 (16392,98,57,4)	Top 100 Optimal
GO:0019439	aromatic compound catabolic process	0.000452	0.205	5.03 (16392,400,57,7)	Top 100 Optimal
GO:0043603	cellular amide metabolic process	0.000476	0.21	4.32 (16392,532,57,8)	Top 100 Optimal
GO:0015980	energy derivation by oxidation of organic compounds	0.000501	0.215	10.85 (16392,106,57,4)	Top 100 Optimal
GO:0006122	mitochondrial electron transport, ubiquinol to cytochrome c	0.000525	0.219	57.52 (16392,10,57,2)	Top 100 Optimal
GO:1901566	organonitrogen compound biosynthetic process	0.000565	0.229	3.43 (16392,839,57,10)	Top 100 Optimal
GO:0045333	cellular respiration	0.00058	0.229	18.36 (16392,47,57,3)	Top 100 Optimal
GO:0016071	mRNA metabolic process	0.000607	0.234	4.17 (16392,552,57,8)	Top 100 Optimal
GO:0006091	generation of precursor metabolites and energy	0.000657	0.247	5.64 (16392,306,57,6)	Top 100 Optimal
GO:1901361	organic cyclic compound catabolic process	0.000704	0.258	4.67 (16392,431,57,7)	Top 100 Optimal
GO:0007006	mitochondrial membrane organization	0.000704	0.252	9.92 (16392,116,57,4)	Top 100 Optimal
GO:0061844	antimicrobial humoral immune response mediated by antimicrobial peptide	0.000826	0.288	16.28 (16392,53,57,3)	Top 100 Optimal
GO:0006357	regulation of transcription by RNA polymerase II	1.68E-63	2.53E-59	6.61 (16392,2312,89,83)	Top 100 Non-optimal
GO:0051252	regulation of RNA metabolic process	8.82E-59	6.62E-55	4.92 (16392,3257,89,87)	Top 100 Non-optimal
GO:0006355	regulation of transcription, DNA-templated	1.02E-55	5.12E-52	5.13 (16392,3015,89,84)	Top 100 Non-optimal
GO:1903506	regulation of nucleic acid-templated transcription	1.02E-55	3.84E-52	5.13 (16392,3015,89,84)	Top 100 Non-optimal
GO:2001141	regulation of RNA biosynthetic process	1.18E-55	3.53E-52	5.12 (16392,3020,89,84)	Top 100 Non-optimal
GO:0019219	regulation of nucleobase-containing compound metabolic process	1.67E-55	4.18E-52	4.51 (16392,3550,89,87)	Top 100 Non-optimal
GO:2000112	regulation of cellular macromolecule biosynthetic process	6.05E-53	1.3E-49	4.58 (16392,3420,89,85)	Top 100 Non-optimal
GO:0010556	regulation of macromolecule biosynthetic process	1.18E-52	2.21E-49	4.54 (16392,3447,89,85)	Top 100 Non-optimal
GO:0010468	regulation of gene expression	8.7E-52	1.45E-48	4.09 (16392,3915,89,87)	Top 100 Non-optimal
GO:0031326	regulation of cellular biosynthetic process	7.38E-51	1.11E-47	4.33 (16392,3619,89,85)	Top 100 Non-optimal
GO:0009889	regulation of biosynthetic process	3.75E-50	5.12E-47	4.24 (16392,3689,89,85)	Top 100 Non-optimal
GO:0051171	regulation of nitrogen compound metabolic process	1.25E-41	1.57E-38	3.13 (16392,5121,89,87)	Top 100 Non-optimal
GO:0080090	regulation of primary metabolic process	2.17E-40	2.5E-37	3.03 (16392,5292,89,87)	Top 100 Non-optimal
GO:0060255	regulation of macromolecule metabolic process	7E-40	7.51E-37	2.99 (16392,5364,89,87)	Top 100 Non-optimal
GO:0031323	regulation of cellular metabolic process	1.93E-39	1.93E-36	2.95 (16392,5427,89,87)	Top 100 Non-optimal
GO:0019222	regulation of metabolic process	1.86E-36	1.74E-33	2.73 (16392,5875,89,87)	Top 100 Non-optimal
GO:0050794	regulation of cellular process	4.61E-19	4.07E-16	1.71 (16392,9369,89,87)	Top 100 Non-optimal
GO:0050789	regulation of biological process	8.5E-17	7.09E-14	1.61 (16392,9965,89,87)	Top 100 Non-optimal
GO:0065007	biological regulation	1.61E-14	1.27E-11	1.51 (16392,10606,89,87)	Top 100 Non-optimal
GO:0000122	negative regulation of transcription by RNA polymerase II	0.000000195	0.000146	4.20 (16392,790,89,18)	Top 100 Non-optimal
GO:0045892	negative regulation of transcription, DNA-templated	0.00000121	0.000867	3.37 (16392,1093,89,20)	Top 100 Non-optimal
GO:1902679	negative regulation of RNA biosynthetic process	0.00000123	0.000839	3.37 (16392,1094,89,20)	Top 100 Non-optimal
GO:1903507	negative regulation of nucleic acid-templated transcription	0.00000123	0.000803	3.37 (16392,1094,89,20)	Top 100 Non-optimal
GO:2000113	negative regulation of cellular macromolecule biosynthetic process	0.00000311	0.00194	3.05 (16392,1269,89,21)	Top 100 Non-optimal
GO:0010558	negative regulation of macromolecule biosynthetic process	0.00000348	0.00209	3.03 (16392,1278,89,21)	Top 100 Non-optimal
GO:0051253	negative regulation of RNA metabolic process	0.00000408	0.00236	3.11 (16392,1183,89,20)	Top 100 Non-optimal
GO:0031327	negative regulation of cellular biosynthetic process	0.00000729	0.00405	2.89 (16392,1340,89,21)	Top 100 Non-optimal
GO:0009890	negative regulation of biosynthetic process	0.00000958	0.00514	2.84 (16392,1364,89,21)	Top 100 Non-optimal
GO:0045934	negative regulation of nucleobase-containing compound metabolic process	0.0000181	0.00939	2.82 (16392,1308,89,20)	Top 100 Non-optimal
GO:0045944	positive regulation of transcription by RNA polymerase II	0.0000497	0.0249	2.95 (16392,1063,89,17)	Top 100 Non-optimal
GO:0010629	negative regulation of gene expression	0.0000563	0.0272	2.52 (16392,1535,89,21)	Top 100 Non-optimal
GO:0051254	positive regulation of RNA metabolic process	0.000139	0.0651	2.44 (16392,1511,89,20)	Top 100 Non-optimal
GO:0045893	positive regulation of transcription, DNA-templated	0.000197	0.0898	2.45 (16392,1428,89,19)	Top 100 Non-optimal
GO:1903508	positive regulation of nucleic acid-templated transcription	0.000197	0.0872	2.45 (16392,1428,89,19)	Top 100 Non-optimal
GO:1902680	positive regulation of RNA biosynthetic process	0.000199	0.0854	2.45 (16392,1429,89,19)	Top 100 Non-optimal
GO:0045935	positive regulation of nucleobase-containing compound metabolic process	0.000676	0.282	2.16 (16392,1704,89,20)	Top 100 Non-optimal
