# Supplementary material for: iCodon: ideal codon design for customized gene expression
Source: Research Square preprint supplement (doi:10.21203/rs.3.rs-598844/v1), 2021-06-21
Supplement: Supplementary file 3 [file 90b4016846cc86a73531bc8b.csv]

ensembl_gene_id	external_gene_name	predicted_mRNA_stability	description	coding
ENSMUSG00000064368	mt-Nd6	0.3605658293357843	mitochondrially encoded NADH dehydrogenase 6 [Source:MGI Symbol;Acc:MGI:102495]	ATGAATAATTATATTTTTGTTTTAAGTTCATTATTTTTGGTTGGTTGTCTTGGGTTAGCATTAAAGCCTTCACCTATTTATGGAGGTTTAGGTTTAATTGTTAGTGGGTTTGTTGGTTGTTTAATGGTTTTAGGGTTTGGTGGATCGTTTTTAGGTTTAATAGTTTTTTTAATTTATTTAGGGGGGATGTTGGTTGTGTTTGGATATACGACTGCTATAGCTACTGAGGAATATCCAGAGACTTGGGGATCTAACTGATTAATTTTGGGTTTTTTAGTATTGGGGGTGATTATAGAGGTTTTTTTAATTTGTGTGCTTAATTATTATGATGAAGTTGGAGTAATTAATCTTGATGGTTTGGGAGATTGGTTGATGTATGAGGTTGATGATGTTGGAGTT…
ENSMUSG00000065947	mt-Nd4l	-0.7120945568293063	mitochondrially encoded NADH dehydrogenase 4L [Source:MGI Symbol;Acc:MGI:102497]	ATGCCATCTACCTTCTTCAACCTCACCATAGCCTTCTCACTATCACTTCTAGGGACACTTATATTTCGCTCTCACCTAATATCCACATTACTATGCCTGGAAGGCATAGTATTATCCTTATTTATTATAACTTCAGTAACTTCCCTAAACTCCAACTCCATAAGCTCCATACCAATCCCCATCACCATCTTAGTTTTCGCAGCCTGCGAAGCAGCTGTAGGACTAGCCCTACTAGTAAAAGTTTCAAACACGTACGGAACAGATTACGTCCAAAATCTCAACCTACTACAATGCTAA
ENSMUSG00000064357	mt-Atp6	-0.06957909693269712	mitochondrially encoded ATP synthase 6 [Source:MGI Symbol;Acc:MGI:99927]	ATGAACGAAAATCTATTTGCCTCATTCATTACCCCAACAATAATAGGATTCCCAATCGTTGTAGCCATCATTATATTTCCTTCAATCCTATTCCCATCCTCAAAACGCCTAATCAACAACCGTCTCCATTCTTTCCAACACTGACTAGTTAAACTTATTATCAAACAAATAATGCTAATCCACACACCAAAAGGACGAACATGAACCCTAATAATTGTTTCCCTAATCATATTTATTGGATCAACAAATCTCCTAGGCCTTTTACCACATACATTTACACCTACTACCCAACTATCCATAAATCTAAGTATAGCCATTCCACTATGAGCTGGAGCCGTAATTACAGGCTTCCGACACAAACTAAAAAGCTCACTTGCCCACTTCCTTCCACAAGGAACT…
ENSMUSG00000064356	mt-Atp8	-0.7382104810381339	mitochondrially encoded ATP synthase 8 [Source:MGI Symbol;Acc:MGI:99926]	ATGCCACAACTAGATACATCAACATGATTTATCACAATTATCTCATCAATAATTACCCTATTTATCTTATTTCAACTAAAAGTCTCATCACAAACATTCCCACTGGCACCTTCACCAAAATCACTAACAACCATAAAAGTAAAAACCCCTTGAGAATTAAAATGAACGAAAATCTATTTGCCTCATTCATTACCCCAACAATAA
ENSMUSG00000064354	mt-Co2	-0.1196487749712217	mitochondrially encoded cytochrome c oxidase II [Source:MGI Symbol;Acc:MGI:102503]	ATGGCCTACCCATTCCAACTTGGTCTACAAGACGCCACATCCCCTATTATAGAAGAGCTAATAAATTTCCATGATCACACACTAATAATTGTTTTCCTAATTAGCTCCTTAGTCCTCTATATCATCTCGCTAATATTAACAACAAAACTAACACATACAAGCACAATAGATGCACAAGAAGTTGAAACCATTTGAACTATTCTACCAGCTGTAATCCTTATCATAATTGCTCTCCCCTCTCTACGCATTCTATATATAATAGACGAAATCAACAACCCCGTATTAACCGTTAAAACCATAGGGCACCAATGATACTGAAGCTACGAATATACTGACTATGAAGACCTATGCTTTGATTCATATATAATCCCAACAAACGACCTAAAACCTGGTGAACTA…
ENSMUSG00000064351	mt-Co1	0.5503828357748223	mitochondrially encoded cytochrome c oxidase I [Source:MGI Symbol;Acc:MGI:102504]	ATGTTCATTAATCGTTGATTATTCTCAACCAATCACAAAGATATCGGAACCCTCTATCTACTATTCGGAGCCTGAGCGGGAATAGTGGGTACTGCACTAAGTATTTTAATTCGAGCAGAATTAGGTCAACCAGGTGCACTTTTAGGAGATGACCAAATTTACAATGTTATCGTAACTGCCCATGCTTTTGTTATAATTTTCTTCATAGTAATACCAATAATAATTGGAGGCTTTGGAAACTGACTTGTCCCACTAATAATCGGAGCCCCAGATATAGCATTCCCACGAATAAATAATATAAGTTTTTGACTCCTACCACCATCATTTCTCCTTCTCCTAGCATCATCAATAGTAGAAGCAGGAGCAGGAACAGGATGAACAGTCTACCCACCTCTAGCC…
ENSMUSG00000078129	Actl10	-0.1251387040950803	actin-like 10 [Source:MGI Symbol;Acc:MGI:1917612]	ATGAAGCCGCGCATTGTGCTGAAGAGCTCAAGTCTGATGCCCAGTTGGGACCGGCCTGTGCTGCCAGGAGCACCAGGTTGCGAGCTGGCAGGCGGCGTGGCCCGTGCGCACCCTATCAAGCATGGAGTAGTGGTGGACTGGGACGCACTGGAGGGACTGTGGGAGCGCCTAATGGTGGGAGGCCTGCAGGTCCACCCCGAGCAGTGGCCTGTGCTGGTGAGCGACTCACCATCAGCACCACCCAAGGGCCGAGAGAAGGTGGCTGAGCTGCTGTTCGAGGCCCTAACAGTGCCTGCGTGCCACATGGCCAACACAGCGCTGCTGGCACTCTGCTCCATAGGAGCTTTCAGTGGGCTGGCTGTGGAGGCGGGCGCGGGCGTGTGCCACGCCACACCCATC…
ENSMUSG00000094391	Btbd35f29	-0.3157985562496598	BTB domain containing 35, family member 29 [Source:MGI Symbol;Acc:MGI:5434802]	ATGGGGCTTTTAGTCAGCAGGGTCTTGAGATGCAGGGATTCCAGTCTGTTAGAGCCACAGCCAGAAGCCATAGCCGGAGCCAGCTACATTCCTGGCAGTCGCAAGCGAAAAAGAAACAGTTTGGAGGAGTTGGCAACAAGTTCTAATGTTCATGGACCTCAAAACCAGGGAATGTATCCACATCAAGTTCTCAACTACATCTACTGGAAAAGGGTTAAGATCTCATCTAATGATGCTTATCAAAACTTATTTTTGGACGGGCATGATAGCGACATTAAAATCCGTGCTCTGGGAAGAACATGGTGCTTACACAAAGTATTTTTATGTCAGTCAGGCTACTTTGCTAACATTCTCAAAGGTACTTGGAGAGAATCACACCAAGGTGTTATAAATCTGATC…
ENSMUSG00000093828	Ccl27a	-0.6020665968454036	chemokine (C-C motif) ligand 27A [Source:MGI Symbol;Acc:MGI:1343459]	ATGATGGAGGGGCTCTCCCCCGCCAGCAGCCTCCCGCTGTTACTGTTGCTTCTGAGCCCGGCTCCTGAAGCAGCCTTGCCTCTGCCCTCCAGCACTAGCTGCTGTACTCAGCTCTATAGACAGCCACTCCCAAGCAGGCTGCTGAGGAGGATTGTCCACATGGAACTGCAGGAGGCTGATGGGGACTGTCACCTCCAGGCTGTCGTGCTTCACCTGGCTCGGCGCAGTGTCTGTGTTCATCCCCAGAACCGCAGCCTGGCTCGGTGGTTAGAACGCCAAGGGAAAAGGCTCCAAGGAACTGTACCCAGTTTAAATCTGGTACTACAAAAGAAAATGTACTCACACCCCCAACAGCAAAACTAA
ENSMUSG00000079222	AC132444.1	0.35521576793868714	NA	ATGCCCCACAGTCCTTCAGGACCCGAGTCAATGGTAAAAGATGACTCTCCAGCAGCAAATGCCCTTGCAATGGCCCAGGAAGTACCCTGCACACCTGCAAACAAGAAAGCAAGAAGAAAAAAATGTCCGAACTGGTCAAATTCCAAAAGAGGACTGCAGAAAAAAAAGCCCCGTCAAGAAGAGATGATGGGAGTGGCCTCACCTGGACATGGAGTTCAAGAGAAGCTCAAGGCGGTGAGCAGGAGGACTTTGTGGAAAGATGACTCATCTACGAACGTGAAGGAGGTGACCAAGACACTGAGAGCAAGGATGAGGTGTGCCCAGACATCCAATTCACAAGAGATCAGCAAAGAGGCATCAAAAACAAGTGGTAGAAAGAGGCCCAGCACAGCACGAAGA…
ENSMUSG00000095763	AC124606.2	-0.039083808061823516	PRAME family member 8-like [Source:NCBI gene;Acc:100039010]	ATGAGTGGTCAGACCCCACCCACACTCCAGAAGCGAGCAAGGCAGACACAGCTGAGAGATGAGGCTTTGGCCATATCCCCTCTGGAGAACGTGCCAGCTGTGTACATCCCATGGCTGTTCCAAGAGGCCTTTGCTGGCAGACACAACTCGCTCATAAAGACAATGGTGGCAGCCTGGCCTTTCCAATATCTCCCTGTGGGGTCATTGATAAATATGCATAACCTGGAAACCTTGCAAGCTCTGCTAGATGGTGTAGACAGGAGACTGACAAGAAAATTTCCCCCCGGGAGGCCAAAACATCAGGTTCTCGACATGAGAAATGTGCACCATGTCTTCTGGAACATAGGGAGCGATGCAAATGACAGTGACTCTGATGCAGAGACCTTGGATGAAAAGCAA…
ENSMUSG00000116179	Olfr290	-0.1017142242653076	olfactory receptor 290 [Source:MGI Symbol;Acc:MGI:3030124]	ATGGACGTCTACAATCTTACCACAGTGACTCAGTTCATCCTCATAGGGCTCTCTGACCTCCCTGAAGTGCGCTATCCACTCTTTGTGGCCTTTGTCATCATCTATCAGATCACTTTACTGGGAAATGGGCTCATCCTCTTGGCCATTGTGACTGAGAAAAAGCTTCAAACTCCCATGTATTACCTGTTGGCAAATCTGTCCTTACTGGACATATTCTGCCCATCAGCTACTGTCCCCAAGATGCTTAAGAATCTCTTGACTGAGGATCACAGCATTTCCTTTGTTGGGTGTGCTTTACAGCTCTATTTCCTGGTGGCTCTAGCTGGGACTGAAGTCTTCTTGCTGGCTGTGATGGCTTATGACCGGTATGTGGCCATATGCTTTCCTCTACGTTACTCT…
ENSMUSG00000096850	Gm21748	0.11260434621361562	predicted gene, 21748 [Source:MGI Symbol;Acc:MGI:5433912]	ATGAATAAGAAGCCTTCTGCAGTCTGTGGCGCTGAGGCACAGGCCTGGTTTCTGCCTTCCATCCGATCCAAAGCAATTCCAGATTCTTCCAGGATGTTTTTTAGGCACAGGCATCGGAACTGCAGGCATGCCCGTATCTCTTCAACCATGCCTGTGCTTCCAGCCACAGTTGTGGCATTGCACTTTCATGCCATTCCTGCTTCACCGAAATGCTGCTCTCATTTCACTCTTCACCGTTGGAGTCCATGTCTATTAATGGTGTATGTCTGCAGCGGAGTGAGTGCTACAAAAGATGGACTCTACCTATAA
ENSMUSG00000094958	3110021N24Rik	-0.48122051089704276	RIKEN cDNA 3110021N24 gene [Source:MGI Symbol;Acc:MGI:1920383]	ATGTCTTCTTTGATCCGCCTCTCCATGGCCCGGGGGTCGTCACTCAGCCGAGAGCCTCGTCCTCAGCGGGGCTCCGCCGCGAAGCCTCGCACTCCTGAGGGGGCTGCGGTCTCAGCGGCCGGGACTGAGGCCCAGCGCCCCTCCAGCCGCCTCAGCCACGCGGGTCCGGGAAAGCGCGGCCGAGCGCGGCCGAGCGCGGCCGGGGGCGCAGCTTACGGCGGGACAACCGAGGCGATGCAGGCAGACGGGCTCGGCGAAGCCTCGGGCGCCGCCGCGGTGGCCGCTTCAGCCGCCCGCGCCGCTGGGCCACAGCGCCCCCTGGACCCCACGTCCCGCTACGGCGCCGGGACTGCGGCGGCCGCACCGGGCACGAGCGGCAGGGAACGCGAGGCAGCGCGG…
ENSMUSG00000094799	AC125149.4	-0.017014427968940458	NA	ATGTTCACTCTGACCAAAGCCTTAGAAAAGGCTCTTCTCCAGCATTTCATATACATGAAGGTGAACATCGCCTATGCCATCAACAAGCCATTCCCCTTCTTCGAAGCGCTCCGGGACAAATCCTTCATCACTGAGAGAATGTACAAGGAATCTCTGGAAGCCTGTCAAAATCTGGTCCCTCTGTCCAAAGTGGTGCACAATATTCTCACCAGTCTGGAGCAGACTTTCCCCCCGTCAGTGCTGCTGACGTTGTTCAGCAAGGTCAACCTCCGGGAATACCCCAGCCTGGTGGCAATTTTCAGAAGCTTCAGAAACGGTAATGTGGTTTCTCCGATCCTTGTCACATGTGCAGTGGTGCTACAGTAA
ENSMUSG00000062783	Csprs	-0.11009329074835081	component of Sp100-rs [Source:MGI Symbol;Acc:MGI:1891441]	ATGAACTCATCTTCTGAGCATTGCAACGTATCTGACTGGCTGAGACTAGAGGCAACCGTGAAGGCCTCTGTGTACGTGGTGGCTTTCTCAATCACCACATCTCTCACCATTGTCATTATCGCAATAGTGTCACAGAGTCTGCAGCTGAGGAAAGAGGTGCGGCTGGTCCTCCTCTGCCATCACCTGCTTTGTATCTCCTCCTACTGTGGCCTGGGGGTCGTCTTCCAAGGAATGCGGGCCTTACTGGCCAACAGCCCCCTCCTGCTGTGTTGGCTGGTATTTGGGGCGCAGCTAAGTGTGGGAGAAGGGATCCTCCTTACTCTGACCTTGATGGCTCTCAATACTTACCTCGCTATTTGTTATCCATTGAACTCTCCATCCTTTGTGGATTCTGCTAAG…
ENSMUSG00000094741	AC140325.2	-0.016468660496664265	PRAME family member 8-like [Source:NCBI gene;Acc:100503733]	ATGACTGTTCAGACTCCGTCCACTCTCCAGAATCTGGCATTGCAGGCTCTGCTGAGAGATGAGGCTTTGGCCTTGTTCTGTCTGGAGGAGGTGCCTTTTCTGCTCTTCCCAGCTCTGTTCAAGGAGGCCTTTGCTGGCAGACTTAAGAAGCTCATGAAGGCAATCGTGGCAGCCTGGACTTTTCCCTGTCTCCCTGTGGGGGCTTTGATGAAGTCACCTAACTTGGAGACCTTGCAGGCTGTGCTAGATGGAATAGACATGCAACTGACAAGAGAATCTCACCCCAGGGGAAAACTTCAGGTTCTGGACCTGAGGAATGTGCACCATGCCTTCTGGGACATATGGGCTGGTGCAGAGGATGGTAGCTGTTCTTCAGAGTCCTTGAATGAGAAGCCTACA…
ENSMUSG00000095250	AC133103.4	-0.003109939948645477	NA	ATGTTCACTCTGACCAAAGCCTTGGAAAAGGCTCTTCTCCAGCATTTCATATACATGAAGGTGAACATCACCTATGCCATCAACAAGCCATTCCCCTTCTTCGAAGCGCTCCGGGACAAATCCTTCATCACTGAGAGAATGTACAAGGAATCTCTGGAAGCCTGTCAAAATCTGGTCCCTCTGTCCAAAGTGGTGCACAATATTCTCACCAGTCTGGAGCAGACTTTCCACCCGTCAGTGCTGCTGACGTTGTTCAGCAAGGTCAACCTCCGGGAATACCCCAGCCTGGTGGCAATTTTCAGAAGCTTCAGAAACGGTAATGTGGTTTCTCCAATCCTTGTCACATGTGCAGTGGTGCTACAGTAA
ENSMUSG00000094293	Gm3893	-0.3773066995325961	predicted gene 3893 [Source:MGI Symbol;Acc:MGI:3782066]	ATGCCCAAAGCTGTCAAAAGCCCATCAAATGCTCTGACTCAAATAACCCCACTTGAGCCCTGCGCTCAGGATGACAGTGGGGTGTCTGCGGACACTGCAGAAGAGTTCCAGCCTGGAGCAGAGGCGGACAGAAGGACAGAGAAGGTGCCTGCAGAGAGTCAGCCTCCCCCATGCAGACCCTACCCAATAAACACACATATCTTGGCCAAACTGAATTTCCACCTGAAAAAAAAGATCCTAGCAATGCAGTTTGGGATTTCTGAAAAGGAAAAGAGAGAATACAAGGAGCTGGGTACAGCCGACCTAGAGAGCGAATCCATCCAGGAATTTCTCAGAAGTCTACACATGTCAGAGAGCACACTGCTTCAGGAACAGCCTGTCGCATGCCCATCTCTGCCA…
ENSMUSG00000094474	AC123873.2	-0.03213216156361973	PRAME family member 8-like [Source:NCBI gene;Acc:100041712]	ATGAGTGGTCAGACCCCACCCACACTCCAGAAGCGAGCAAGGCAGACACAGCTGAGAGATGAGGCTTTGGCCATATCCCCTCTGGAGAACGTGCCAGCTGTGTACATCCCATGGCTGTTCCAAGAGGCCTTTGCTGGCAGACACAACTCGCTCATAAAGACAATGGTGGCAGCCTGGCCTTTCCAATATCTCCCTGTGGGGTCATTGATAAATATGCATAACCTGGAAACCTTGCAAGCTCTGCTAGATGGTGTAGACAGGAGACTGACAAGAAAATTTCCCCCCGGGAGGCCAAAACTTCAGGTTCTCGACATGAGAAATGTGCACCATGTCTTCTGGAACATAGGGAGCGATGCAAATGACAGTGACTCTGATGCAGAGACCTTGGATGAAAAGCAA…
ENSMUSG00000090625	Gm20721	-0.2298657022651188	predicted gene, 20721 [Source:MGI Symbol;Acc:MGI:5313030]	ATGCATGCGCTGGATGATGTCACGGCAGTCGTTGAAGACACGGCGGATGTTCTCAGTGTCCACGGCGCAGGTAAAGTGAGGGTAGCAGTAGTGGCGCCCATCTCCACTAGCAGTGCTGATTCTCAGAAACTCATCCCGAATGAAGTACTTGGCCCGGGTCACGCGTGGGTCCTCTCCCGGCTCGGGAGTCGCATCCTCAGGAGTGGTGTAGCGAGCGAACTCTGGAAAGTAGTCCTCAATCTTCGATTTGCCAGCGAGGACTTTCTCAGCAAGCAGGTCTTGCTTGTTGAGGAAGAGAATCACAGAGATGGTGCGCAGCCATCTGTTGTTCCAGATGCTCTTGAAGAGGTTCAGAGCCTCCTGCAGGCGGTTAGTCTGGTTGTCCTCCCGAATGACCAT…
ENSMUSG00000096776	Vmn1r186	-0.6025468496056979	vomeronasal 1 receptor Vmn1r186 [Source:NCBI gene;Acc:100039479]	ATGGAAGTGTTGGCTCTTCAGATCCTTTTGCTTTGCCATGTTGTGGTTGGGACTGTGGGCAACATCCTTCTGTTTGTCCATAACTTCTCTCCAATCTTGACTGACTCCAGACTGAGGCCAATACAAGTCATTCTAATCAACTTGGCTGTGGCCAATGCATTCATGCTCCTTCTGTTTGCATATTCATATGACCTTACTGATATTGTTCCCAGGAAGCCTCCAACTGACCTCAAATGTAAACTTGCATATTTCTTTCACCTGGTTGCTCGAGGCACAATCATGTGCTCCACCTGTGTCCTCAGCACCTACCAGTTTGTCACTCTTGTTCCTGGTACCTGGGCTAGGGTCATGTTCAGCGAAATATCCCCCAAGGTTGTGAGCTATTGTTGTTACAGCTGC…
ENSMUSG00000015126	Tsr3	0.07283130228727455	TSR3 20S rRNA accumulation [Source:MGI Symbol;Acc:MGI:1915577]	ATGGGCCGCAAGAAAGTTGCTCGCGGATCCAGGAAAGAGAGCGGTCGTGTTCGGCGACCCTCTGGCCGCTCTCTGGATGCTTTCGCTGAAGAGGTGGGCGCTGCGCTGCGTGCATCCGTGCAGCCCGAGGAGGCCGAGGACCAGGGCGGCCCGGGCCCTGCGGCGCTGCCTTGTGCCTTGGCTATGTGGGAGCTTGGTCACTGCGACCCCAAGCGCTGCACGGGCCGCAAACTGGCCCGTCTGGGTCTGGTGCGCTGCCTGCGCCTGAGCCAAAGGTTTGGCGGTCTGGTGCTCAGCCCAGTAGGCACTGAGTACGTGTCTCCGGCAGACAGACAGCTGGTGGCACAGTCAGGGGTCGCAGTCATAGACTGCTCCTGGGCCAAACTGGACGACACACCC…
ENSMUSG00000068068	Gm7735	0.518180789276305	predicted gene 7735 [Source:MGI Symbol;Acc:MGI:3649168]	ATGTGCTACTACAGAGGATATTATGGAGGCCTGGGCTATGGCTATGGTGGCCTAGGCTGTGGCTATGGCTGTGGCTATGGCTGTGGCTATGGTGGCTATGGATATGGCTGCTGCCGCCCACTGTGCTGTGGAAGATACTGGTCTTATGGCTTCTACTGA
ENSMUSG00000035521	Gnptg	-0.1765129271459794	N-acetylglucosamine-1-phosphotransferase, gamma subunit [Source:MGI Symbol;Acc:MGI:2147006]	ATGGCGGGGCGGCTGGCTGGCTTCCTGATGTTGCTGGGGCTCGCGTCGCAGGGGCCCGCGCCGGCATGTGCCGGGAAGATGAAGGTGGTGGAGGAGCCTAACACATTCGGGCTGAATAACCCGTTCTTGCCCCAGGCAAGCCGCCTTCAGCCCAAGAGAGAGCCTTCAGCTGTATCCGGGCCCCTGCATCTCTTCAGACTTGCTGGCAAGTGCTTTAGCCTAGTGGAGTCCACGTACAAGTATGAATTCTGCCCTTTCCACAACGTCACCCAGCACGAGCAGACCTTCCGCTGGAACGCCTACAGCGGGATCCTTGGCATCTGGCATGAGTGGGAAATCATCAACAATACCTTCAAGGGCATGTGGATGACTGATGGGGACTCCTGCCACTCCCGGAGC…
ENSMUSG00000096968	Gm26620	-0.27655659219340045	predicted gene, 26620 [Source:MGI Symbol;Acc:MGI:5477114]	ATGAAGGCCACGCAGCGATCCAGGTGGCTGAGCAGGTCGGTCTCGGGTTTGTCCAGCGCCGGCACGAAGAGGCTCCGGAGACCTTCGAACCCAGCCCCAGCCGGGAAAGCCGGTTCAGAGTCCACCGTCAGCACGGCGGTGATGCCCGCCTCCCTCAGATGGCCCGGTTCCGCCACTGCCGCTGCCCCACCCAGATACAGCCCGGGCCGCACTTCCACGGCGTGCCCTGCCGAGCTGGCGGGACTGGCAGTCGGAGCCTGGCGCTCGCAGCCATGGTTAGAACCCTGCGCTTCCAACATGGCAGAGCCAGGAAGCCAGGCAGCCGCTGCCCGCCACCAAGTCACCGGCTAG
ENSMUSG00000095470	Gm21863	-0.23135944442469833	predicted gene, 21863 [Source:MGI Symbol;Acc:MGI:5434027]	ATGCCGGACCAGATCTCTGTGTCGGAATTCCTGGCCGAGACCCTTGAGGACTACAAGGCGCCCACGGCCTCTAGCTTCACCACGCGCACGGCCCAGTGCCGGAACACCGTGGCGGCGGTCGAGGAGGTGAGCGGTAGCTTTGCCCGCGCCGGGAGGGAGGCTAGGGCCTCGGGGATCGCGCTGAGCCCTGGGGCCCGGCTAGGCTTCCGCGCCTGGTGCCCGATATCCAGTGCCCTCCGCCTGCGCCCACACCCGGGAAAAGTTTCTGGTCCCCCAAAGCCGGACGCAGCCGGGCCAGCAGTGCCCGACACAGAAGCCCTTTGTTCCCTGCTCTAG
ENSMUSG00000094728	AC132444.2	0.19592015085458894	NA	ATGACCCAACTGCCTCTGGCTCTGGGATTTGGAGTAAGTAGGCTTTGGAAGGCAGCCCAGCTTAGGTGTGTCTACTTGCATCCTAGTATCTGTTGTTACATTACACAAGTGACCCTGGGATGCTCTGCACTTCGGAGCATTCCTGCTTGCTATTCGTCGCTGTCACCATGTGCCTCAGCCTCAGTTACTGCAGAGGTGAATGTAAATGGTTCCTGTGATGTCTATCCCTCCAGTTATCTTCTGACTTACAAAGGTGATGTCCCTTCATCCCTGGAGGTGCTTCAGCCTGTTGGCTACACCCAGAAGTACAGCATGATACAGCACAGGGCAGGCTTGCTGTCAGGACTGAGTTCATTCTCCACACTCACCTGA
ENSMUSG00000072693	Gm10401	0.09279703016591104	predicted gene 10401 [Source:MGI Symbol;Acc:MGI:3704254]	ATGCACTGGTTCAAGAGGCGGTTACTAAAAACTGCGAGGGAAAAGCCTGTAAAAAGAAAAGGGTCAAAAAGTTCAAACTTTTCATCCCTAATTTGCTACACTGATCAAAAGGAGGAGTCCCCACAGCCCACAAGTCTATCAGTTCAGCGCATCCACAGCTTACAACCGCACGCGACTCTCAAGGGAGACAGCAGCGTGTGCGAGGAAGCCAGGTAA
ENSMUSG00000095456	Il11ra2	-0.12233402422635828	interleukin 11 receptor, alpha chain 2 [Source:MGI Symbol;Acc:MGI:109123]	ATGAGCAGCAGCTGCTCAGGGCTGACCAGGGTCCTGGTGGCCGTGGCTACAGCCCTGGTGTCTTCCTCCTCCCCCTGCCCCCAAGCTTGGGGTCCTCCAGGGGTCCAGTATGGACAACCTGGCAGGCCCGTGATGCTGTGCTGCCCCGGAGTGAGTGCTGGGACTCCAGTGTCCTGGTTTCGGGATGGAGATTCAAGGCTGCTCCAGGGACCTGACTCTGGGTTAGGACACAGACTGGTCTTGGCCCAGGTGGACAGCCCTGATGAAGGCACTTATGTCTGCCAGACCCTGGATGGTGTATCAGGGGGCATGGTGACCCTGAAGCTGGGCTTTCCCCCAGCACGTCCTGAAGTCTCTTGCCAAGCGGTAGACTATGAAAACTTCTCCTGTACTTGGAGT…
ENSMUSG00000096244	AC102264.1	-0.6304955385229057	vomeronasal 1 receptor Vmn1r187 [Source:NCBI gene;Acc:100039499]	ATGGAAATGTTGGCTCTTCAGATCCTTTTGCTTTGCCATGTTGTGGTTGGGACTGTGGGCAACATCCTTCTGTTTGTCCATAACTTCTCTCAAATCTTGACTGACTCCAGACTGAGGCCAATACAGGTCATTCTAATCAACTTGGCTGTAGCCAATGCATTCATGCTCCTTCTCTTTGCATATTCATATGATCTTACTGATATTGTTCCCAGGAAGCCTCCAACTGACCTCAAATGTAAACTTGCATACTTCTTTCACCTGGTGGCTCGAGGCACAATCATGTGCTCCACCTGTGTCCTCAGTACATACCAGTTTGTCACTCTTGTTCCTGGTACCTGGGCTAGGGTCATGTTCAGCGAAATATCCCCCAAGGTTGTAAGCTATTGTTGTTACAGCTGC…
ENSMUSG00000025218	Poll	-0.2339020706528637	polymerase (DNA directed), lambda [Source:MGI Symbol;Acc:MGI:1889000]	ATGGACCCTCAGGGCATCGTGAAGGCCTTTCCCAAGCGGAAGAAAAGTCATGCAGATCTATCTTCAAAAGCACTTGCAAAGATTCCCAAAAGGGAGGTGGGAGAAGCTAGAGGATGGCTGAGCTCCCTGAGAGCCCACATTATGCCCGCTGGCATTGGACGTGCCCGGGCTGAACTCTTTGAGAAGCAGATTATCCACCATGGCGGCCAGGTGTGCTCTGCCCAGGCCCCAGGAGTCACTCACATTGTGGTGGATGAAGACATGGACTATGAGCGGGCTCTCCGGCTCCTCAGGTTGCCCCAGCTACCCCCTGGTGCCCAGCTGGTGAAGTCCACCTGGCTGAGCTTGTGCCTGCAGGAGGGAAGGCTGACAGACACGGAAGGATTCAGCCTTCCCATG…
ENSMUSG00000095759	Gm21828	-0.5478803323758002	predicted gene, 21828 [Source:MGI Symbol;Acc:MGI:5433992]	ATGACTAACATAAACTTCGCCACTTCTGATTCTGCTAAAGGAGCCTGCAGATGCTCACCATCTCATGAGGTGGGCCTCAGAAGTCCCCTACCAAGCCAAGGCATTCACAGACCATCTAAGTCTACTGAAACCCCATCAGAAAAAGCCCCTTCTGACCAATGGGACACCAAAGCTTCCAATTCAGAGCATGAGGTTGACAAGCCATCTTCCATCCTTACAGAAGAGTTCATGCGAACCACTCTTTCTCATGAAGACAGCCTCAGGCATCACACCTTCCTCATGAGATTCCCAGACACGCTACTTCTACCAAAAGAAAACAGAGGAAAGCCTCTGTTTCCCAAGGAGCCCTGCAAACTTCCCCTACAGATCAAGAATGCATTGAGTCATCTCCAGATGGAG…
ENSMUSG00000096728	AC140325.4	-0.16754577088099074	PRAME family member 8-like [Source:NCBI gene;Acc:665755]	ATGAGTGTTCAGACTCTGTCCACTCTCCAGAATCTGACATTGAAGGCTCTGCTGAGAGATGAGGCTTTGGCCTTGTCCTGTCTGGAGGAGGTGCCTTTTCTGCTCTTCCCAGCACTGTTCCAGAGGGCCTTTGCTGGCAGACTTAAGAAGCTCATGAAGGCAATCATGGCAGCCTGGACTTTTCCCTGTCTCCCTGTGGGGGCTTTGATGAAGTCACCTAACCTGGAGACCTTGCAGGCTGTGCTAGATGGAATAGACATGCAACTGACAAGAGAATCTCACCCCAGGGGAAAACTTCAGGTTCTGGACCTGAGGAATGTGCACCATGCCTTCTGGGACATATGGGCTGGTGCAGAGGATGGTAGCTGTTCTTCAGAGCCCTTGGATGAGAAGCCTACA…
ENSMUSG00000063897	CAAA01118383.1	-0.330943804002542	dehydrogenase/reductase (SDR family) X chromosome [Source:NCBI gene;Acc:236082]	ATGTCCACCTTGCGAGCGCTGCGGGCCGTGCTCTGCGTCTACGCCGTGGGCATCGCGGTGGCGCTGGCGCAGCTTCTGCGCAGGCTCCGCGGCGACTTCCGGCCGCCGGTTCTTCCCCCCCAGCCGGGCCGTGTGGCCATCGTGACAGGGGCGACAGCTGGCATCGGGCGTAGCACCGCGAGGCAGCTGGCGCGGCTGGGCATGTGCGTGGTCGTGGCCGGCAATGACGAGCACTGCGGACAGGAAGTTGTCAGCTCCATCCGGGCCGAGATGGGGAGCGACCGAGCGCACTTCTTGCCCCTGGACCTCGCCTCCCTGGCCTCCGTCCGAGGCTTCGCCCGCGACTTCCGGGCGCTGGGACTCCCCCTGCACCTGCTCGTCAACAACGCGGGCGTGATG…
ENSMUSG00000095570	AC140325.3	-0.05366444637060405	PRAME family member 8-like [Source:NCBI gene;Acc:624931]	ATGAATGTTCATACCCCACCCACACTCCAGAAGCTGGCAATTCAGACTCTGGTGAGAGAGGAGGCTCTAGGCATGTCTGATCTGGAGGAGATGGCCCATGGACTCTTCCCAGCACTTTTCAAGGAGGCCATTGATGGCAGATATATCAAGCTCATAAAGGCATTGGTGATAGCCTGGCCTTTCCACTGTCTCCCTGTGGGGGCATTGATGAGGACTACTGACCTGGAAACATTGCAGGCTGTGCTAGATGGAGTAGACATTCGTCGAACCATAGGGTTTCACCCCAGGAAAAAACTACAGTATCTCGACCTGAGGAATGTGCACCATAGCTTCTGGAACATATGGACTGATTCAGAGGACAGTGACTATTCAGCAGAGATCTTGGATGAAAAGAAAGCC…
ENSMUSG00000094887	AC163611.2	-0.09995457146738759	PRAME family member 9/15-like [Source:NCBI gene;Acc:100041806]	ATGAGTGGTCAGACCCCACCCACACACACTCTGCTGACACATGAAGCTTTGATCATGTCCTCTCTGGAGGAGTTGCCTACTGTGGTCTTCCCAGCACTATTCAAAGAGGCCTTTGCTGGCAGACAAACCAATCTCCTAAAGGCAATGGTGGCAGCCTGGCCTTTCCCCTGTCTCCCTGTGGGGTCATTGATGAAGAAGCCTAACCTAGAAACCTTGCAAGCCCTGCTAGATGGAATAGACATGCGACTGACAAGAGAGTTTCACCCCAGGAGGGCAAAACTTCAGGTTCTTGACATGAGAAATATGTACCATGCCTTCTGGAACATACGGGCTGATGCAAATGACAGTGACTATAAATCAAAGACATTGGATGAAAAGCAGCTAGTGAAGGTCCTTCCG…
ENSMUSG00000096730	Vmn2r122	-0.1861628198240611	vomeronasal 2, receptor, 122 [Source:MGI Symbol;Acc:MGI:1316661]	ATGAAGCAGCTCTGCACTTTCACTATTTCATTGTTGTTTCTGAAGTTTTCTCTCATCTTGTGCTGTTGGAGTGAACCAAGCTGCTTTTGGAGGATAAAGAAGAGTGAAGATAATGATGGAGATTTACAAAGGGAGTGTCATTTTTACCTTTGGAAAACTGATGAACCTATTGAAGATAGTTTTTATAATTATGATTTAAGTTTTAGAATTGCAGGAAGTGAATATGAGCTTCTTCTGGTAATGTTTTTTGCTACTGATGAGATCAACAAGAATCCTTATCTTTTACCCAACATGAGTTTGATGTTCTCCATCATTGGTGGAAACTGTCATGATTTATTGAGAAGTCTGGATCAAGAATATGCACAAATAGATGGACATATGAATTTTGTTAATTATTTC…
ENSMUSG00000096120	Gm21800	-0.521180947588454	predicted gene, 21800 [Source:MGI Symbol;Acc:MGI:5433964]	ATGACTAACATAAACTTCGCCACTTCTGATTCTGCTAAAGGAGCCTGCAGATGCTCACCATCTCATGAGGTGGGCCTCAGAAGTCCCCTACCAAGCCAAGGCATTCACAGACCATCTAAGTCTACTGAAACCCCATCAGAAAAAGCCCCTTCTGACCAATGGGACACCAAAGCTTCCAATTCAGAGCATGAGGTTGACAAGCCATCTTCCATCCTTACAGAAGAGTTCATGCAAACCACACTTTCTCATGAAGACAGCCTCAGGCATCACACCTTCCTCATGAGATTCCCAGACACGCTACTTCTACCAAAAGAAAACAGAGGAAAGCCTCTGTTTCCCAAGGAGCCCTGCAAACTTCCCCTACAAATCAAGAATGCATTGAGTCATATCCAGATGGAG…
ENSMUSG00000070023	Gm10283	0.1066520525171323	predicted gene 10283 [Source:MGI Symbol;Acc:MGI:3647628]	ATGAATTTTAAAGGACGTTGGAAACAATTCATTGCTCTCAGAGAGCAGAAGAGCTTCCTTTTACACATTTGCTTTTGTTTATGTGTGATTGACTGTAACTCCATGCCTGAGACTTCTCTCCTTACTCGGACACTACTCGTATTGGATTATGGCTTACCTCGATGTTGTTTTACCTGTGCCTTGTATATAAAACCCTATCTTCAGGCCATTGGAACTGGCTCACAGGAGAAATCTGGATGGTTTGGATTTGCAGCCTGTGGTGGTTTGAGTATGCTTAGCCCAAGGAGTGACACTATTGGGAAGTGTGGCCCTGTTGGAGTGGAGGAAGTATATCACTGTGGATGTGGGGTTTGA
ENSMUSG00000074922	Fam122a	-0.7993475178219028	family with sequence similarity 122, member A [Source:MGI Symbol;Acc:MGI:1915284]	ATGGCTCAGGAGAAGATGGAGCTGGACCTGGAGTTGCCCGCGGGCGCGAGCCCGGCGGAGGGCGGCGGCCCTGGCGGCGGGGGCCTGCGGAGGTCTAACAGCGCCCCCCTGATCCACGGCCTCAGCGACTCGTCGCCGGTGTTCCAGGCCGAGGCGCCCAGCGCCAGACGGAACAGCACGACGTTCCCGAGCCGCCACGGCCTGCTGCTCCCGGCCTCGCCGGTCCGAATGCACAGCAGCCGCCTGCACCAGATCAAACAGGAGGAGGGCATGGACCTGATCAACCGAGAGACCGTTCACGAGCGCGAGGTGCAGACCGCAATGCAGATAAGCCACTCCTGGGAGGAAAGTTTCAGCCTGAGTGACAACGACGTGGAGAAATCCGCCTCCCCGAAGCGC…
ENSMUSG00000095672	AC133103.5	-0.001977017851035077	NA	ATGTTCACTCTGACCAAAGCCTTGGAAAAGGCTCTTCTCCAGCATTTCATATACATGAAGGTGAACATCGCCTATGCCATCAACAAGCCATTCCCCTTCTTCGAAGCGCTCCGGGACAAATCCTTCATCACTGAGAGAATGTACAAGGAATCTCTGGAAGCCTGTCAAAATCTGGTCCCTCTGTCCAAAGTGGTGCACAATATTCTCACCAGTCTGGAGCAGACTTTCCACCCGTCAGTGCTGCTGACGTTGTTCAGCAAGGTCAACCTCCGGGAATACCCCAGCCTGGTGGCAATTTTCAGAAGCTTCAGAAACGGTAATGTGGTTTCTCCGATCCTTGTCACATGTGCAGTGGTGCTACAGTAA
ENSMUSG00000093883	Gm21866	-0.5339483899431835	predicted gene, 21866 [Source:MGI Symbol;Acc:MGI:5434030]	ATGACTAACATAAACTTCGCCACTTCTGATTCTGCTAAAGGAGCCTGCAGATGCTCACCATCTCATGAGGTGGGCCTCAGAAGTCCCCTACCAAGCCAAGGCATTCACAGACCATCTAAGTCTACTGAAACCCCATCAGAAAAAGCCCCTTCTGACCAATGGGACACCAAAGCTTCCAATTCAGAGCATGAGGTTGACAAGCCATCTTCCATCCTTACAGAAGAGTTCATGCGAACCACTCTTTCTCATGAAGACAGCCTCAGGCATCACACCTTCCTCATGAGATTCCCAGACACGCTACTTCTACCAAAAGAAAACAGAGGAAAGCCTCTGTTTCCCAAGGAGCCCTGCAAACTTCCCCTACAGATCAAGAATGCATTGAGTCATATCCAGATGGAG…
ENSMUSG00000094337	Gm3286	0.011900931982424725	predicted gene 3286 [Source:MGI Symbol;Acc:MGI:3781464]	ATGAGTGGTCAGACCCCACCCACACTCCAGAAGCTAGCAAGGCAGACACTGCTGAGAGATGAGGCTTTGGCCATATCCTCTCTGGAGGAGCTGCCAGCTGTGGTCTTCCCACCACTGTTCCAAGAGGCCTTTGCTGGCAGACTCAACAAGCTCATAAAGGCAATGGTGGCAGCCTGGCCTTTCCACGATCTCCCTGTGGGGCCATTGATAAATATGCATAACCTGGAAACCTTGCAAGCTCTGCTAGATGGAGTAGACATGAGACTAACAAGAAAATTTCACCCCTGGAGGCCAAAACTTCAGGTTCTCGACATGAGAAACGTGGACCATGTCTTCTGGAACATATGGAGCGATGCAAATGACAGTGACTCTGATGCAGAGACCTTGGATGAAAAGCAA…
ENSMUSG00000094836	AC123873.3	-0.11256715121452573	PRAME family member 9/15-like [Source:NCBI gene;Acc:100861655]	ATGAGTGGTCAGACCCCACCCACACACACTCTGCTGACACATGAAGCTTTGATCATGTCCTCTCTGGAGGAGTTGCCTACTGTGGTCTTCCCAGCACTATTCAAAGAGGCCTTTGCTGGCAGACAAACCAATCTCCTAAAGGCAATGGTGGCAGCCTGGCCTTTCCCCTGTCTCCCTGTGGGGTCATTGATGAAGAAGCCTAACCTAGAAACCTTGCAAGCCCTGCTAGATGGAATAGACATGCGACTGACAAGAGAGTTTCACCCCAGGAGGGCAAAACTTCAGGTTCTTGACATGAGAAATATGTACCATGCCTTCTGGAACATACGGGCTGATGCAAATGACAGTGACTGTAAATCAAAGACATTGGATGAAAAGCAGCTAGTGAAGGTCCTTCCG…
ENSMUSG00000002658	Gtf2f1	-0.0461581706508932	general transcription factor IIF, polypeptide 1 [Source:MGI Symbol;Acc:MGI:1923848]	ATGGCGGCTCTAGGCTCCAGCAGCCAGAATGTCACCGAGTACGTCGTCCGAGTCCCCAAGAACACAGCCAAAAGATACAACATAATGGCTTTTAATGCAGCCGATAAAGTCAACTTTGCTACCTGGAACCAGGCACGGCTGGAGCGAGATCTGAGCAACAAGAAGATTTACCAGGAAGAAGAGATGCCAGAGTCCGGTGCAGGCAGTGAATTCAACCGCAAGCTTAGGGAGGAGGCGCGCCGGAAGAAGTATGGCATTGTCCTAAAGGAGTTTCGGCCTGAGGACCAGCCTTGGCTACTCCGTGTCAATGGCAAATCAGGACGGAAGTTCAAAGGCATTAAGAAAGGCGGGGTAACAGAGAACACAGCCTACTACATCTTCACACAGTGTGCTGATGGT…
ENSMUSG00000096680	AC164084.3	-0.12435604653401863	PRAME family member 8-like [Source:NCBI gene;Acc:102634529]	ATGAATGTTCATACCCCACCCACACTCCAGAAGCTGGCAATTCAGACTCTGGTGAGAGAGGAGGCTCTAGGCATGTCTGATCTGGAGGAGATGGCCCATGGACTCTTCCCAGCACATTTCAAGGAGGCCATTGATGGCAGGTATATCAAGCTCATAAAGGCATTGGTGATAGCCTGGCCTTTCCACTGTCTCCCTGTGGGGGCATTGATGAGGACTACTGACCTGGAAACATTGCAGGCTGTGCTAGATGGAGTAGACATTCGTCGAACCATAGGGTTTCACCCCAGGAAAAAACTACAGTATCTCGACCTGAGGAATGTGCACCATAGCTTCTGGAACATATGGACTGATTCAGAGGACAGTGACTATTCAGCAGAGATCTTGGATGAAAAGAAAGCC…
ENSMUSG00000094661	Ccl19	0.21356350965193352	chemokine (C-C motif) ligand 19 [Source:MGI Symbol;Acc:MGI:1346316]	ATGGCCCCCCGTGTGACCCCACTCCTGGCCTTCAGCCTGCTGGTTCTCTGGACCTTCCCAGCCCCAACTCTGGGGGGTGCTAATGATGCGGAAGACTGCTGCCTGTCTGTGACCCAGCGCCCCATCCCTGGGAACATCGTGAAAGCCTTCCGCTACCTTCTTAATGAAGATGGCTGCAGGGTGCCTGCTGTTGTGTTCACCACACTAAGGGGCTATCAGCTCTGTGCACCTCCAGACCAGCCCTGGGTGGATCGCATCATCCGAAGACTGAAGAAGTCTTCTGCCAAGAACAAAGGCAACAGCACCAGAAGGAGCCCTGTGTCTTGA
ENSMUSG00000096885	Gm21797	-0.48832532074827506	predicted gene, 21797 [Source:MGI Symbol;Acc:MGI:5433961]	ATGACTAACATAAACTTCGCCACTTCTGATTCTGCTAAAGGAGCCTGCAGATGCTCACCATCTCATGAGGTGGGCCTCAGAAGTCCCCTACCAAGCCAAGGCATTCACAGACCATCTAAGTCTACTGAAACCCCATCAGAAAAAGCCCCTTCTGACCAATGGGACACCAAAGCTTCCAATTCAGAGCATGAGGTTGACAAGCCATCTTCCATCCTTACAGAAGAGTTCATGCAAACCACACTTTCTCATGAAGACAGCCTCAGGCATCACACCTTCCTCATGAGATTCCCAGACACGCTACTTCTGCCAAGAGAAAACAGAGGAAAGCCTCTGTTTCCCAAGGAGCCCTGCAAACTTCCCCTACAGATCAAGAATGCATTGAGTCATCTCCAGATGGAG…
ENSMUSG00000078240	Gm3550	0.3744610737893568	predicted gene 3550 [Source:MGI Symbol;Acc:MGI:3781727]	ATGGCCAAGTCCAAGAACCACACCACACACAACCAGTCCCGCAAATGGCACAGAAATGGCATCAAGAAACCCCGGTCGCAAAGATACGAATCTCTTAAGGGGGTTGACCCCAAGTTTCTGAGGAACATGCGCTTTGCCAAGAAGCACAACAAGAAAGGCCTGGAGAAGATGCAGGCCAGCAATGCAAAGGCAGTGAGTGTGCACGCAGAGGCCATCAAGGCCCTGGTGAAGCCTCAGGCCATCAAGCCCAAGATGCCAAAAGGCCCCAAACTCAAGCGGCTGGCTTTTATCGCTCACCCTAAGCTTGGGAAGCGGATTCGAAGCTACATGGCCAAGGGTCAGAGGCTCTGCCAACCGAAGCCCAAGGTCCAAACCAAGGCAGGGGCCAAAGCTCCAGCT…
ENSMUSG00000022591	Gm9747	-0.32041797407953176	predicted gene 9747 [Source:MGI Symbol;Acc:MGI:3710571]	ATGGAAGTCTTTTTGTTACTACTGACAAGGTTGTGCCTGCTCACACACCTGGAAGGACACCCTGCTTCTTTCAAGACTTTCAAGCAGCCAGAGCAGGTGAGGAGAGCATCACCTCCTGCTAACATCCACCTTGTCATGACAGCACTAGCCCCCCTGTCCTGTCACTACCAAGAAACTAGTTCTTACTTGGTTCCCCGAGTTGTCCTCCATATGCCTTCCAAAAAATCCTTTTCTCCCCAATGTCAGTTTCCTGGTATAGGACCTCTTTGTATGACTATCTCAGTTAGCGAGCTCAGCCAAGGCAGCATGAGGTAA
ENSMUSG00000095552	4933409K07Rik	-0.9656835137226446	RIKEN cDNA 4933409K07 gene [Source:MGI Symbol;Acc:MGI:1918429]	ATGCCAGACCCAACATTATTTCGTCGATCTCGAGAAAATCCATCTTCCTGCACTCTGAGCAGCAGTTCTAAGGTCATTGAGGACAGAACTGGGATCGTTTCCCACAAGACCAGCAGCTTGTATTCGGCAGGCCAGCCCGTCCAGACCTTCTGGGTTTCCAAACGGCCTGTTATAAACCTGCAACAAGGAAGGCCCTGGCACCAAATTCATACTTGCTTGCCCTCTCATGAAGGTGAACATCTAAGGAATTTCTATCCACTCCCCAGGGCAAAAGCTAATGACTCAGGGGACAATCTTCAGAGTGAATATTATAGCCACTTATTCTGTGGCCTTCCATCTCTTCACAGTGAGTCCTTGGATGTTACTTACTTGAGTTCTCAAGGTACCTGCAAGAAAAAG…
ENSMUSG00000116184	4632433K11Rik	-0.10204259728168372	RIKEN cDNA 4632433K11 gene [Source:MGI Symbol;Acc:MGI:1924293]	ATGAGAAAATTAGGGACCCTTCTGAGTAAGTACACCAACCTCCTACATCACCTCATTGCACAAAACTTCTTACAACACAACCAAATAGACATCTCCAAACAGCCCAAGCCTGGTCACTCACCATTCCAGATAATGGATAACTACCCAGAGAATTGGAATACAAGACTGACAGAGAAGACTTACAGAAAGTCTTTTAATAGGAACAGACTGGAAGTCCCCACTCTTACCCTGTACGCTAACTCCCAAGTCCTTTTAGCCCCTTACCACAGTGTCATTTCTTTCTTTACACCCTGTACTGGCCCACCAAGGTGGTCACTAGCTAACCCTGCCTCAGAATTGCCCAGGGCTATGCAGGAAGATGCCTACTTCAGAGTGCAGAATAGAGAGATGGGAAATTTC…
ENSMUSG00000116275	Zc3h11a	-0.37906720237704616	zinc finger CCCH type containing 11A [Source:MGI Symbol;Acc:MGI:1917829]	ATGCCTAATCAGGGAGAAGACTGCTATTTTTATTTCTATTCTACATGCGCCAAAGGTGACAGCTGCCCATTCCGTCACTGTGAAGCTGCACTAGGAAATGAAACTGTTTGCACACTATGGCAAGAAGGTCGTTGTTTTCGACAGGTGTGCAGATTTCGTCACATGGAAATTGACAAAAAACGAAGTGAAATTCCTTGTTATTGGGAAAATCAGCCAGTGGGATGTCAAAAACTAAACTGCGCTTTCCATCACACCAGAAGCCGCTATGTTGATGGACTCTTCCTACCTCCAAGCAAAACTGTGTTACCCACTGTGCCTGAGTCACAAGAAGAAGAAGTAAAGACTAGCCAGCTCACAGTTCAACAGAGCAAATTGTCTGTTCAGTCTAACCCCTCCCCT…
ENSMUSG00000094227	Gm21767	-0.493383779348726	predicted gene, 21767 [Source:MGI Symbol;Acc:MGI:5433931]	ATGACTAACATAAACTTCGCCACTTCTGATTCTGCTAAAGGAGCCTGCAGATGCTCACCATCTCATGAGGTGGGCCTCAGAAGTCCCCTACCAAGCCAAGGCATTCACAGACCATCTAAGTCTACTGAAACCCCATCAGAAAAAGCCCCTTCTGACCAATGGGACACCAAAGCTTCCAATTCAGAGCATGAGGTTGACAAGCCATCTTCCATCCTTACAGAAGAGTTCATGCGAACCACACTTTCTCATGAAGACAGCCTCAGGCATCACACCTTCCTCATGAGATTCCCAGACACGCTACTTCTGCCAAGAGAAAACAGAGGAAAGCCTCTGTTTCCCAAGGAGCCCTGCAAACTTCCCCTACAGATCAAGAATGCATTGAGTCATCTCCAGATGGAG…
ENSMUSG00000096271	Ccl21b	0.04054467498302464	chemokine (C-C motif) ligand 21B (leucine) [Source:MGI Symbol;Acc:MGI:1349182]	ATGGCTCAGATGATGACTCTGAGCCTCCTTAGCCTGGTCCTGGCTCTCTGCATCCCCTGGACCCAAGGCAGTGATGGAGGGGGACAGGACTGCTGCCTTAAGTACAGCCAGAAGAAAATTCCCTACAGTATTGTCCGAGGCTATAGGAAGCAAGAACCAAGTTTAGGCTGTCCCATCCCGGCAATCCTGTTCTTACCCCGGAAGCACTCTAAGCCTGAGCTATGTGCAAACCCTGAGGAAGGCTGGGTGCAGAACCTGATGCGCCGCCTGGACCAGCCTCCAGCCCCAGGGAAACAAAGCCCCGGCTGCAGGAAGAACCGGGGAACCTCTAAGTCTGGAAAGAAAGGAAAGGGCTCCAAGGGCTGCAAGAGAACTGAACAGACACAGCCCTCAAGAGGA…
ENSMUSG00000095505	AC164084.1	-0.2253379390015585	NA	ATGAGTGGTCAGACCCCACCCACACGCACTCTGCTGACACATGAAGCTTTGATCAAGTCCTCTCTGGAGGAGTTGCCTACTGTGGTCTTCCCAGCACTATTCAAAGAGGTCTTTGCTGGCAGACACACCAATCTCCTAAAGGCAATGGTGGCAGCCTGGCCTTTCCCCTGTCTCCCTGTGGGACCATTGATAAAGAAGCCTAACCTAGAAACCTTGCAAGCTCTGCTAGATGGAGTAGACATGAGACTGACAAGAGAGTTTCACCCCAGGTGCCTGATGACTCCCTTCGAGACCTTCTCCATCACCCAATGCCTAATTTCACAGAGAGACTTTGATTTCTTTTCTTGCTCCCACAACCTCTTTAAATTAAAACATCTGGAAATAAGAGGGATGATCTTA…
ENSMUSG00000074210	E130208F15Rik	-1.3037364149721118	RIKEN cDNA E130208F15 gene [Source:MGI Symbol;Acc:MGI:3767226]	ATGAGTTCACGATCCTCCCCAAACTGTCAGAAGGAACCTTCCTCTAGGTCTGTCTGTCACCGTCCATCGGATCGCGTCTCCCGCGCCCCTGTATCTTCACAAGAATTCTTTGGGGCACCACCATCATCCAGCCTGGTCCCCGGGGCTGTCGCGTCGCCGGGCTCTTCAGCCGGACCCCGCGGGCGCACGAAGGTACCCATGGCCGTGGCGTGGCCCGAACGCAGCAGCTGTAGCTGGCGCCGACCCCGGCGATACAGATACTCGATACGCAGCACGTCGGTTCGCGGAAGGCTGGCGTGCTGCCGGAACTCGGCCCGCACCCGCGCCTCGGCGCCCGGCGTCCCGCGCCCGGCGCGCAGCAGCTCGCGGTACAGGCTCAGAACTTGCCTCTGCAACCGG…
ENSMUSG00000038555	Reep2	0.5100845645822268	receptor accessory protein 2 [Source:MGI Symbol;Acc:MGI:2385070]	ATGGTGTCCTGGATCATCTCTCGCCTGGTGGTGCTCATCTTTGGCACCCTGTACCCAGCCTATTCTTCCTACAAGGCCGTGAAGACCAAAAACGTGAAGGAATACGTAAAATGGATGATGTATTGGATAGTCTTCGCCTTCTTCACCACAGCTGAGACACTTACAGATATAATACTGTCCTGGTTCCCCTTCTACTTTGAGCTCAAGATTGCCTTTGTGATATGGCTGTTGTCCCCTTACACCAAGGGCTCCAGTGTCCTCTACCGCAAGTTCGTGCACCCAACACTGTCCAACAAGGAAAAGGAGATCGACGAATACATCACACAAGCTCGAGACAAGAGCTATGAGACGATGATGAGGGTGGGCAAGAGGGGCCTGAACCTGGCTGCCAATGCTGCA…
ENSMUSG00000079773	AC087559.2	-0.2402583738442364	uncharacterized LOC100862220 [Source:NCBI gene;Acc:100862220]	ATGTCGCGATTGAGGAGATACGAGGTGGCGCTGGAAGCGGAGGAGGAGATCTACTGGGGCTGCTTCTACTTTTTTCCTCGGTTGCGAATGTGGCGCAGGGAGCGGAGCTCGGCGCACCCCCGGGAGCAGAAGCTGGAGCCTCTGCGGGGCCTAATGAGCTGTTTGTCGAGCGGCCTGAGGCCTGCTCCCCAGCGCTCGGGTCGTGGTCTCCTCTGTCGCACCCCCACCGCTGCTGCACAGACAGCCGGTGCATTAAAGATTTAA
ENSMUSG00000079800	AC125149.3	0.16212208831076194	NA	ATGACCCAACTGCCTCTGGCTCTGGGATTTGGAGTAAGTAGGCTTTGGAAGGCAGCCCAGCTTAGGTGTGTCTACTTGCATCCTAGTATCTGTTGTTACATTACACAAGTGACCCTGGGATGCTCTGCACTTCGAAGCATTCCTGCTTGCTATTCATCGCTGTCACCATGTGCCTCAGCCTCAGTTACTGCAGAGGTGAATGTAAATGGTTCCTGTGATGTCTATCCCTCCAGTTATCTTCTGACTTACAAAGGTGATGTCCCTTCATCCCTGGAGGTGCTTCAACCTGTTGGCTGCACCCAGAAGTACAGCATGATACAGCACAGGGCAGGCTTGCTGTCAGGACTGAGTTCATTCTCCACACTCACCTGA
ENSMUSG00000025226	Fbxl15	-0.4702661485346614	F-box and leucine-rich repeat protein 15 [Source:MGI Symbol;Acc:MGI:1915681]	ATGGAGCCACCAATGGAGCAGTCCGGAGGGGAGCAAGAACCAGGAGCTGTCAGGCTCCTGGACCTGCCCTGGGAAGACGTGCTGCTCCCGCACGTCCTGAACTGGGTCCCGCTGCGCCAGCTGCTCCGGCTGCAGCGCGTCAGTCGCGCCTTCCGGGCGCTCGTTCAGCTGCACTTGGCGAGGCTGCGCCGCTTCGACGCCGCTCAGGTGGGTCCACAGATTCCACGGGCGGCACTAGCCCGGCTACTGCGGGATGCTGAGGGGCTGCAGGAGCTGGCGCTGGCTCCGTGTCACGAATGGCTGTCGGACGAGGACCTGGTGCCGGTGCTGGCACGGAATCCACAGCTCCGGAGCGTAGCGCTGGCCGGCTGCGGCCAACTGAGTCGCCGAGCCCTGGGG…
ENSMUSG00000071036	Gm10309	-0.0332852188426461	predicted gene 10309 [Source:MGI Symbol;Acc:MGI:3641941]	ATGAGTCTGCGGAAGAAGACTACAGCACATCACCAAGGACAGAACAGCTTAGAAGAGAGAAACCTTAAGTCCTTATTTGAATTTAGCTTGGTCCTTCAGCAGGCTGCTGCTGGCAAACTTAACTGGGCCATTATGGTTGTTACCAATGGCTCTGCATGGCCATCCTTGCTGGATGCCAGAAAAGGCACAGGACCTTACTTTACCCTCTCCCAAGCTCTCCCAGCCAACCTGTACATGGCACCCAGTTTAAAGTTCTGCATAATCGACCAGGACGCTCTCAAGGCAGCTTCCAGAAGAGCTATTCCTCCCTGTATACTAAAACCTGAGTCTGTTAGTGACTTTTCTAATTGCTGTAACTAG
ENSMUSG00000095092	AC125149.5	-0.004428810845201612	NA	ATGTTCACTCTGACCAAAGCCTTGGAAAAGGCTCTTCTCCAGCATTTCATATACATGAAGGTGAACATCACCTATGCCATCAACAAGCCATTCCCCTTCTTCGAAGCGCTCCGGGACAAATCCTTCATCACTGAGAGAATGTACAAGGAATCTCTGGAAGCCTGTCAAAATCTGGTCCCTCTGTCCAAAGTGGTGCACAATATTCTCACCAGTCTGGAGCAGACTTTCCACCCGTCAGTGCTGCTGACGTTGTTCAGCAAGGTCAACCTCCGGGAATACCCCAGCCTGGTGGCAATTTTCAGAAGCTTCAGAAACGGTAATGTGGTTTCTCCGATCCTTGTCACATGTGCAGTGGTGCTACAGTAA
ENSMUSG00000097078	Gm26566	-0.7478525432348136	predicted gene, 26566 [Source:MGI Symbol;Acc:MGI:5477060]	ATGTCGCCGTTACCCAGAGACACCTTCATGGGAGAAGCCGGAGCTCGCTGCGAGCTGCAGGCCGCAGACGTTACAAAGAGAACGCTCTCGGGAAACCCCGGGGCCGCCGAACCAAGGGCAAGCAAGCGGTCGCCGCAGCACCGCTCTGGGCACACCGACGTCCGCCCTGCAGCAACAGCAGCACGCACCTCAAATCTGCCAGGAGAGCGGGTGAGTCATCACCCGGGGCAGTTACGTGACCGCTTCACCTCCTCCGGTCCCGGGCTGTCGTCCTTCGCCGCTGCGCTCAGGGCGGGGGAGGGGCCGTCACGGCCTGCGCACCCCGGCTGCCGCCCTCCAAGGCTCAGCCACCCCAACGAGCTGCGGCCGCGTCCTCTGCGATCCCCGCTGTGTCGTCGC…
ENSMUSG00000073492	Gm10521	-0.4669920679536451	predicted gene 10521 [Source:MGI Symbol;Acc:MGI:3642358]	ATGTCATCACCTGCCACCATAACCTGCCACCTCCAGGTACAGGTGCCCTGGTATATAAAAGACTGTTTGCCACCCCAATTCTCTCTCTCTCTCTCTCTCTCTCTCTCTCTCTCTCTCTCTCTCTCTCTCTCTCTCTCTCTCTCTCCCTCTCTCTCTCTCTCTCTCTCTCCTCTCTCTCTTGCTCGCTTGCTCACTCTGTCTTTCACCCTTTCTATCCTTTTTCTGTCCTCCTCTGTCCTCCCTTCTCTGCCCTCCTTGCTCTGCTCCTGTCTGTCTGCCTCTCCCCTATCTACAGGCCCTCATGCCATCCCTCAAATATACTTCCCTCACACCATATTTGTTACATGGCATGATTTCTCAGAGGGACCCCTACCTATGCACCCTATTATATTTTATAAC…
ENSMUSG00000116057	Vmn1r216	0.10796020411049848	vomeronasal 1 receptor 216 [Source:MGI Symbol;Acc:MGI:2159696]	ATGAAGATAATTTGGAGTGATCTCGTCCAGGGAATAATTTTCATTTCACTTACTGGATTTGGAGTTTTAGGAAACTTCATATTATTTGTGAGACATGTATATACTTTCATTATGGGTTCTGAGAACAAAAATATAGATGTAATTTTCATCCACTTGGCTTTTGTAAACACAATCATTATTTACTGTATAGGAGTCAGAAACATAGCCACAGTTTTTTACATCAGAAACTTCCTAAGTGATGTTGGTTGTAAAACTATAGTTTATCTAGAAAGGGTTGCCCGTGGCCTCTCCATCTGCACCACCTGTCTCCTCAGCATGGTCCAGGCTGTCACCATCAGTCCCAGGACCACACTGTGGAGAAAACTCAAACAGCATATTCTTGCCTTTCTCTTCCTCTTT…
ENSMUSG00000096083	Gm10428	-0.0885337937806133	predicted gene 10428 [Source:MGI Symbol;Acc:MGI:3704375]	ATGAAGACGCAAAGAAGGCCTTTCCGAATTCATTACATTCATAAAGTTTCTCTTTATTGTGACCTCTTCATGTTGAATGAGCAGTGCCTTCAAACAAAAGGCCCTTTCACATGTGCCTACATCTATAGGGTTTTTTATTTTTCAGTACTGGGATTTTTTTCCCTCAAAATAAATGATGAAGTCTGCCTTATAATTTTTCTGTCTTCTGTATCCTTGACGATTACCTCCCCCAAATGGGTATCTGCAATCAAATGTAAATTCTTCGTGGAGATTCCCTCATGTGTTCGGCGTTGTTGGCCAGGTCCTTCTGTGACAATTCCTGGTTCTGGGAAAAGAGAAGCTTCAAGTCTGGAGCCCCTTAGAGCAGCTTGCTTCTTCTCCCTCCTTACTAGTCTCTGA
ENSMUSG00000096550	Gm16367	-0.03903538772359036	predicted gene 16367 [Source:MGI Symbol;Acc:MGI:3845011]	ATGAGTGGTCAGACCCCACCCACACTCCAGAAGCGAGCAAGGCAGACACAGCTGAGAGATGAGGCTTTGGCCATATCCCCTCTGGAGAACGTGCCAGCTGTGTACATCCCATGGCTGTTCCAAGAGGCCTTTGCTGGCAGACACAACTCGCTCATAAAGACAATGGTGGCAGCCTGGCCTTTCCAATATCTCCCTGTGGGGTCATTGATAAATATGCATAACCTGGAAACCTTGCAAGCTCTGCTAGATGGTGTAGACAGGAGACTGACAAGAAAATTTCCCCCCGGGAGGCCAAAACTTCAGGTTCTCGACATGAGAAATGTGCACCATGTCTTCTGGAACATAGGGAGCGATGCAAATGACAGTGACTCTGATGCAGAGACCTTGGATGAAAAGCAA…
ENSMUSG00000094855	AC133095.1	-0.09397632850506507	uncharacterized LOC620639 [Source:NCBI gene;Acc:620639]	ATGAATGTTCATACCCCACCCACACTCCAGAAGCTGGCAATTCAGACTCTGGTGAGAGAGGAGGCTCTAGGCATGTCTGATCTGGAGGAGATGGCCCATGGACTCTTCCCAGCACTTTTCAAGGAGGCCATTGATGGCAGACATATCAAGCTCATAAAGGCATTGGTTATAGCCTGGCCTTTCCACTGTCTCCCTGTGGGTGCATTGATGAGGACTACTGACGTGGAAACATTGCAGGCTGTGCTAGATGGAGTAGACATTCGTCGAACCATAGGGTTTCACCCCAGGAGGAAAAAGCTACAGTTTCTCGACCTGAGGAATGTGCACCATAGCTTCTGGAACATATGGACTGATTCAGAAGACAGTGACTATTCAGCAGAGATCTTGGATGAAAAGAAA…
ENSMUSG00000051412	Vamp7	0.0011512241947716738	vesicle-associated membrane protein 7 [Source:MGI Symbol;Acc:MGI:1096399]	ATGGCCATTCTTTTTGCTGTTGTTGCCAGGGGAACCACTATCCTTGCCAAACATGCTTGGTGTGGAGGAAACTTCCTGGAGGTGACAGAGCAGATTCTGGCTAAGATACCTTCTGAAAATAATAAACTAACTTACTCACATGGCAATTATTTGTTTCATTACATCTGCCAAGACAGGATTGTGTATCTTTGTATCACTGATGATGATTTTGAGCGTTCTCGAGCGTTCAGTTTTTTGAATGAAGTAAAGAAGAGATTCCAGACAACTTACGGTTCAAGAGCACAAACTGCACTTCCTTATGCTATGAATAGCGAGTTTTCAAGTGTTTTGGCTGCACAACTGAAGCATCACTCTGAGAATAAGAGCCTAGACAAAGTGATGGAGACTCAAGCACAAGTG…
ENSMUSG00000094487	Gm21958	0.6563984798373738	predicted gene, 21958 [Source:MGI Symbol;Acc:MGI:5439427]	ATGCTCATTAAAATATCAAGAAAATGTACCTCAGAGATTTTAAGTGATTTACCCAAGGTAGTAATGATGATGGAACATCCAGTTAAATATGTAGCAAAATCAACATCCATGACCCAAATATAG
ENSMUSG00000094350	Gm10931	0.1471077583302224	predicted gene 10931 [Source:MGI Symbol;Acc:MGI:3779142]	ATGGGATTGAGTAGGCAATCTGGATATATAAGAAGGACTAAGCCAAGTTCAGAAGGTCTGTCATGGCAAAGCCCATGTCTTGTGTTTAGCATAGTCTCTGACATAAGAGACAAGCACCCGGCCCACAGTGCACATATTTGTGAGTACAAGGTCTTTCTCAAAGCCATGCTTCCAGAGACCTCACCCTCATCCGAGTACTTCGTCCTGTGTCAGGGCTCCGTACTCTATGGCTTTAATGATCCTAAAGCGAAGCGATGGCTGGAATATGTCACTAATGACATTATGATGCACTGGCAGCCATCGTCCCAAGGAATCTCTGAAGTTAAAAAAATCCATGGAGCCGTTAGATGCCAGCCAGGAGGAATCCGTTCCTGGGACAAGTTGTCGTACTTTTCGGCC…
ENSMUSG00000074215	Gm10643	-0.23178662400774028	predicted gene 10643 [Source:MGI Symbol;Acc:MGI:3642507]	ATGGTGGCTCCAAGGAATAGGGTTGCCCCACCTGCACCTGGAGATGCAGCACCCAGCTGTGTCCCTGGTCAGGCTTCCCATGTCACAAGTGTGAGCTTCAGCAGAAGGAAACACAGCTGTTCCCAGTCCCAAGAACCCACAAGCACTGAAAGACATCCAGGCCAGAGGGCACAGAAGCACACCTCAGCTGGCAGGGGAGCTTCACTCGTACCCCACTGCCACTTCTGTGAAGACTTGAGTTTCCAGATTACAGGAAGAATGCTTGTGCGAAGGGACCTAGAAGACTTGGTTGTACTTCCCATCATTCCCCAGCTCCCAGAAGACCCTGAACTCTGA
ENSMUSG00000116158	Kiss1	0.17552141021204262	KiSS-1 metastasis-suppressor [Source:MGI Symbol;Acc:MGI:2663985]	ATGATCTCAATGGCTTCTTGGCAGCTGCTGCTTCTCCTCTGTGTCGCCACCTATGGGGAGCCGCTGGCAAAAGTGAAGCCTGGATCCACAGGCCAGCAGTCCGGACCCCAGGAACTCGTTAATGCCTGGGAAAAGGAATCGCGGTATGCAGAGAGCAAGCCTGGGTCTGCAGGGCTGCGCGCTCGTAGGTCGTCGCCATGCCCGCCGGTTGAGGGCCCCGCGGGGCGCCAGCGGCCCCTGTGTGCCTCCCGCAGTCGCCTGATCCCTGCGCCCCGCGGAGCGGTGCTGGTGCAGCGGGAGAAGGACCTGTCCACCTACAACTGGAACTCCTTCGGCCTGCGCTACGGCAGGAGGCAGGCGGCGCGGGCAGCACGGGGCTGA
ENSMUSG00000074473	A230072I06Rik	-0.04760550085946588	RIKEN cDNA A230072I06 gene [Source:MGI Symbol;Acc:MGI:3588221]	ATGAGAGGTAGTGAAAGGAGAGTAGCGGGAGGCAGAGAGAGGGTGGGGCTGCAGGCTTGGCTACTCCAGAAGAAGGAAGAGTGGTGCCAACTCACTTCTGGGAGAGCAAGGACTGTGCAGTTGGGGGTAAGAGACACCCACATATCAGCTTCCTCCTCCCCAGTCCTGGTCTCCGCAGAAGGAACTAGAGGCATGCCATGCATGGGAGAGGAAGCTTCTACGTGCTCTGGTAGAGAGGAAAGTGGAAAGAGCCTAGCTAGTACACCACAGCAGCTCCTCAGCGGTCCTCCGAGAAGGCTCCACGGAGTCAGGGCTTTGCCAGCGAGACAGATCTGGACAGACTGCAGACTCTCGGGAACTTTCAGACCCTCGGCCTCTTCTTTGTGTAGTTCATCTCTG…
ENSMUSG00000094576	AC087559.3	-0.5262307157836247	protein FAM205A-2-like [Source:NCBI gene;Acc:115489314]	ATGGGCCTGGTGACATGTTCTCACTCACAGCAGGCAAAAGGGACAATCCCCATGCCACACTTGTTTGCCAAGACAAGGGAAATGTTGAAAAGCCATGTTGATTCCAAATGTGAACAGATCCGGGAGGGCAAGGTCCCGGCCCAAGTCTGGAAATCTTGGGAATGCAAAATTCCTGGAAGCTTAGCAACAGTGGCTCCCTTCCCTTGGATTCCACAAGGCCAATGCAGGAAGTTACAGGCAGAAAGTAAAAGTGACCCTGACTTACTTCACAAAGTTGTTCCCTGGAAACCAAAGACCCTCAGCCAGGAGACACAAACCTTATCTGGTACTCTCTTTGAACACTGTAAGAAGCCCCAATCCCTGCCTAAGGAAACCATTAAGAAACTGGAGACAACTTTA…
ENSMUSG00000073489	Ifi204	-0.14504673854634528	interferon activated gene 204 [Source:MGI Symbol;Acc:MGI:96429]	ATGGTGAATGAATACAAGAGAATTGTTCTGCTGAGAGGACTTGAATGTATCAATAAGCATTATTTTAGCTTATTTAAGTCATTGCTGGCCAGAGATTTAAATCTGGAAAGAGACAACCAAGAGCAATACACCACGATTCAGATTGCTAACATGATGGAAGAGAAATTTCCAGCTGATTCTGGATTGGGCAAACTGATTGCGTTTTGTGAAGAAGTACCAGCTCTTAGAAAACGAGCTGAAATTCTTAAAAAAGAGAGATCAGAAGTAACAGGAGAAACATCACTGGAAAAAAATGGTCAAGAAGCAGGTCCTGCAACACCTACATCAACTACAAGCCACATGTTAGCATCTGAAAGAGGCGAGACTTCTGCAACCCAGGAAGAGACTTCCACAGCTCAG…
ENSMUSG00000032193	Ldlr	0.04037672561318831	low density lipoprotein receptor [Source:MGI Symbol;Acc:MGI:96765]	ATGAGCACCGCGGATCTGATGCGTCGCTGGGTCATCGCCCTGCTCCTGGCTGCTGCCGGAGTTGCAGCAGAAGACTCATGCAGCAGGAACGAGTTCCAGTGTAGAGACGGAAAATGCATCGCTAGCAAGTGGGTGTGCGATGGCAGCCCCGAGTGCCCGGATGGCTCCGATGAGTCCCCAGAGACATGCATGTCTGTCACCTGTCAGTCCAATCAATTCAGCTGTGGAGGCCGTGTCAGCCGATGCATTCCTGACTCCTGGAGATGTGATGGACAGGTAGACTGTGAAAATGACTCAGACGAACAAGGCTGTCCCCCCAAGACGTGCTCCCAGGATGACTTCCGATGCCAGGATGGCAAGTGCATCTCCCCGCAGTTTGTGTGTGATGGAGACCGAGAT…
ENSMUSG00000032079	Apoa5	-0.41690640397221157	apolipoprotein A-V [Source:MGI Symbol;Acc:MGI:1913363]	ATGGCTGCAGTCATCACTTGGGCCCTCGCCCTCCTCGCAGTGTTCGCAAGCACTCAGGCACGGAAGAGCCTCTGGGACTACTTCAGCCAAAACAGTTGGAGCAAAGGCGTGATGGGCCAGCCACAGAAGCTGGCACAGGAGAACCTGAAAGGCAGCTTCGAGCAAGACCTCTACAATATGAACAATTACCTAGAAAAGCTGGGACCCTTGAGAGGGCCTGGGAAGGAGCCTCCTCTGCTGGCCCAGGACCCAGAAGGCATTCGGAAACAGCTGCAGCAGGAGCTGGGGGAAGTGAGCTCGCGCCTGGAGCCCTACATGGCTGCGAAGCACCAGCAGGTAGGCTGGAACTTGGAGGGCCTGAGGCAGCAGTTGAAACCCTACACGGCGGAGCTGATGGAG…
ENSMUSG00000051590	Map3k19	-0.5220612006716657	mitogen-activated protein kinase kinase kinase 19 [Source:MGI Symbol;Acc:MGI:1203481]	ATGAACAAAAACAGACTGATTCATGATTTCCTTGGCGTGGTTTCAAGGGGTGACGTGGAATGCATTTGTGGCCTTATTCCTGAAGTCCACTCAGTCCTTGGAAATCTTGACTTTCAGCACCCACAGACGGGGAACACGCCTCTCATTACTGCTGCGGAAGAAAATCTAGCAGAGGTTGTTGAGATTCTTCTGGAAGGGGGCGCAGATATCACCCTTTGCAATTACAGCAATCAAACTGCGCTCCATGTGGCTAATGGTGACATCCAGAGACAACTCTTGGCTGGCAAGGGAATCCAGGCTCCCCAAATGCAGCTCCTACGAAGCTCGTGGCTAGGTGATCTGAAGCAGCTTCGACACTTGCTGGCATGTGAAGAGTTCCTGGATATAAACTTCCCCAAC…
ENSMUSG00000042622	Maff	-0.2599166245470387	v-maf musculoaponeurotic fibrosarcoma oncogene family, protein F (avian) [Source:MGI Symbol;Acc:MGI:96910]	ATGGCTGTGGATCCCTTATCTAGCAAAGCCCTGAAGGTCAAGCGCGAGTTGAGCGAGAACACGCCGCACCTGTCGGATGAAGCGCTGATGGGGCTGTCGGTGCGCGAGCTGAACCGCAACCTGCGCGGGCTGTCGGCGGAGGAGGTGACGCGGCTGAAGCAGCGGCGCCGCACACTCAAGAACCGCGGCTACGCGGCCAGCTGCCGCGTGAAGCGCGTGTGCCAGAAGGAGGAGCTGCAGAAGCAGAAGTCCGAGCTGGAGCGCGAGGTGGACAAGCTGGCGCGCGAGAACGCCGCCATGCGCCTGGAGCTCGACGCGCTGCGCGGCAAGTGTGAAGCGCTGCAGGGCTTCGCGCGCTCCGTGGCCGCCGCCCGCGGGCCCGCCGCACTGGTGGCGCCC…
ENSMUSG00000039720	Got1l1	0.2592001044258565	glutamic-oxaloacetic transaminase 1-like 1 [Source:MGI Symbol;Acc:MGI:1923865]	ATGACCAGTCTTTCTGTGTTCAGGGATGTACCCACAGCCCAGAAGCTAGAAGGCAGCTTACTAAAGATCTACAGGCAAGATGGCTATCCCAGCAAGTTGTTCCTGGCCTACAAAGTCTGCATGACCGAAGAAGGCCATCCCTGGGTTTCTCTTGTGGTGCACAAGACCCGCCTGCAGATTGCAGAGGACCCCTCTCTGGACTATGAGTACTTGCCCCTGGTGGGCCTGAAATCATTCATCCAGTCTTCTCTGGAACTCCTCTTTGGAAAGCACAGCGAAGCCATTGCGGAGAAAAGGGTTGGGGGTGTGCACATCGTTGGTGAGAGTGGAGCCTTCCAGCTTGGGGCTCAGTTCCTCAAGACGTGGCGAAAGAATGTGAAAATCGTTTGTATCGTCTCA…
ENSMUSG00000096486	Gm5426	0.6577939396344487	predicted pseudogene 5426 [Source:MGI Symbol;Acc:MGI:3646788]	ATGGCCAAGTTCATCCATAACTTCTCGGAGAAGGCACTGTCGATGGTGGCCGCTGCCGTGACTTACTTGAAGCCTCAATTGGTCACATTTTGGCACTACGCCAAGGTTGAGCTGGTTCCCCCAACCCCTGGTGAAATCCCTACAGCTATTCAGAATGTGAAAAAAATCATTCAAAGTGCTAAAACTGGTAGCTTCAAACACCTTACAGTGAAGGAAGCTGTGCTGAATGGTTTGGTGGCCACTGAGGTGTTGATGTGGTTTTATATCGGAGAGATCATGGGCAAACGTGGCATTGTTGGCTATGATGTTTGA
ENSMUSG00000057335	Cep170	-0.7846979683207432	centrosomal protein 170 [Source:MGI Symbol;Acc:MGI:1918348]	ATGAGCCTAACATCCTGGTTTTTGGTGAGCAGTGGAGGCACTCGCCACAGGCTGCCACGAGAAATGATTTTCGTTGGAAGAGACGACTGTGAGCTCATGCTTCAGTCCCGAAGTGTGGATAAACAACATGCAGTAATCAATTATGATGCATCTATGGATGAACATTTGGTGAAAGATTTAGGCAGCCTAAATGGGACCTTTGTGAATGATGTAAGGATACCAGAGCAGACGTACATCACTTTGAAGCTTGAAGATAAGCTGAGATTTGGATATGATACAAATCTCTTCACTGTAGTACGAGGAGAAATGAGGGTCCCTGAAGAAGCTCTTAAGCACGAGAAGTTTACCATTCAGCTTCAATTGTCCCAGAAGTCTTCAGAATCAGAATTACCAAAATCA…
ENSMUSG00000024754	Cemip2	-0.2511403475077577	cell migration inducing hyaluronidase 2 [Source:MGI Symbol;Acc:MGI:1890373]	ATGTATGCCGCTGGTTCCAGGGGCCACTCCCCTGCTTTCCTGCAACCTCAAAACGGAAACGGCCACCGCTCACCTGGTTATGTTCCCGGGAAGGTGGTTCCCTTACGTCCCGCGCCTCCTCCAAAGAACCACGCCTCCGCCAAACTGACCTCCAGGAGCCAAGACGCCCCAGCGACCTTTGCTTTCTCCCCCGAGGAGCAGCGGACTCCGAGCGAGAGCCGAAAGCGGAAGAGGCACAAGAACACCTTCATCTGCTTCGCCATAACCAGCTTCTCGTTCTTTGTGGCGCTTGCGGTCATTTTGGGAATATCCTCAAAATACGCTCCAGATGAGAATTGTCCAGATCAAAACCCTCGTCTCAGGAACTGGGATCCAGGACAAGATTCTGCGAAGCACATT…
ENSMUSG00000079480	Pin4	0.5140538425848974	protein (peptidyl-prolyl cis/trans isomerase) NIMA-interacting, 4 (parvulin) [Source:MGI Symbol;Acc:MGI:1916963]	ATGCCGCCGAAGGGGAAAAGTGGTTCTGGAAAAGGAGGGAAAGGAGGTGCAGCCTCTGGGAGTGACAGTGCTGACAAGAAGTCTCAGGGTCCTAAAGGTGGTGGCAATGCAGTAAAGGTCAGACACATTCTGTGTGAAAAACATGGGAAAATCATGGAAGCCATGGAAAAGTTAAAGTCTGGGATGAGATTCAGTGAAGTGGCCACACAATATAGTGAAGATAAAGCCAGACAAGGGGGTGACTTGGGTTGGATGACCAGAGGATCCATGGTGGGGCCATTTCAAGAAGCAGCGTTTGCCTTGCCTGTAAGTGGGATGGATAAGCCTGTGTTTACAGACCCACCAGTTAAGACAAAATTTGGATATCATATTATTATGGTTGAAGGGAGAAAATAA
ENSMUSG00000027505	Fam209	-0.05120870735472147	family with sequence similarity 209 [Source:MGI Symbol;Acc:MGI:1923676]	ATGCGGACGCTGCTGAGATGGTGCCTGTTCTTGTCTCTGTGCGTCTCTTGTGCCTGTGCCTTCATGTTTTCTTCGATGAGGGAGAAAACCAAGGAAAGCCCAGGGAAGGTGCCTTGCGGCGGACACTTCCGGATTAGACAGAATCTTCCAGAGAATGCCCAAGGCTGGCTTGGGAACAAATGGCTCTGGCTTTTTGTTGCCATTATGATATATGTGATGCTGAAGTTTCGAGGAGATGGCGAGAATAAGGAGCAGCATCCTCCTGGCCTCCGAGGCTGCCAGCTCCGCTCTCCACCAAAGAAAGCTCAAAATATTTCCCCCAGCAAAGACTTCACTTTCAATACTTTAACCCAGCTCGAGATGGAATTGGTGAAATTTGTGTCCAAGGTGCGGAACCTT…
ENSMUSG00000038437	Mllt6	-0.519122254807267	myeloid/lymphoid or mixed-lineage leukemia; translocated to, 6 [Source:MGI Symbol;Acc:MGI:1935145]	ATGAAGGAGATGGTAGGAGGCTGCTGCGTATGTTCGGACGAGAGGGGCTGGGCCGAAAACCCGCTGGTCTACTGCGATGGGCACGCGTGCAGCGTGGCCGTCCACCAAGCTTGCTATGGCATCGTCCAGGTGCCAACAGGACCCTGGTTCTGCAGGAAATGTGAATCTCAGGAGCGTGCAGCCAGGGTGAGGTGTGAGCTGTGCCCGCACAAAGATGGGGCATTGAAGAGGACTGACAATGGAGGCTGGGCCCATGTGGTGTGCGCCCTCTACATCCCGGAGGTGCAGTTCGCCAACGTGCTCACGATGGAGCCCATCGTTCTGCAGTACGTGCCTCATGATCGCTTCAACAAGACCTGTTACATCTGTGAGGAACAGGGCCGGGAGAGCAAAGCTGCC…
ENSMUSG00000021585	Cast	-0.05816102144157895	calpastatin [Source:MGI Symbol;Acc:MGI:1098236]	ATGTCCCAGCCCGGCCCGAAGCCTGCCGCCTCTCCCAGGCCCAGTCGCGGCGCGGCAGCTCGCCACACCCAGGAGCATGTTAATGAAAAGAATATTGGATCATCTTCTAAACCAGGAGAAAAGAAAGGATCCGATGAGAAAAAAGCAGCAAGTTTGGGGAGCAGTCAGCCTTCCAGACCACATGTTGGTGAAGCTGCCACAGCCACCAAGGTGACAGCTTCCTCTGCTGCCACCAGCAAGTCCCCCAGCATGAGTACCACAGAGACTAAGGCAATTCCAGTAAACAAACAGTTGGAAGGACCTGACCAGAAAAGACCCAGAGAACAGGCTGTGAAAACAGAGTCTAAGAAACCACAATCAAGTGAGCAACCTGTGGTTCACGAGAAAAAGTCAAAAGGA…
ENSMUSG00000017831	Rab5a	0.0505410423472438	RAB5A, member RAS oncogene family [Source:MGI Symbol;Acc:MGI:105926]	ATGGCTAATCGAGGAGCAACAAGACCCAACGGGCCAAATACTGGAAATAAAATATGCCAGTTCAAACTGGTCCTTCTAGGAGAGTCTGCTGTTGGCAAATCAAGCCTGGTTCTTCGCTTTGTGAAAGGCCAATTTCATGAATTTCAAGAGAGTACCATTGGGGCTGCCTTTCTAACCCAAACTGTGTGTCTTGATGACACAACAGTAAAATTTGAAATATGGGATACAGCTGGTCAAGAACGGTATCATAGCTTAGCACCAATGTACTACCGAGGAGCACAAGCAGCCATAGTTGTGTATGATATCACAAATGAGGAATCCTTTGCGAGAGCAAAAAACTGGGTTAAAGAACTTCAAAGGCAAGCAAGTCCTAATATTGTGATAGCTTTGTCAGGAAAC…
ENSMUSG00000029648	Flt1	-0.389079304084904	FMS-like tyrosine kinase 1 [Source:MGI Symbol;Acc:MGI:95558]	ATGGTCAGCTGCTGGGACACCGCGGTCTTGCCTTACGCGCTGCTCGGGTGTCTGCTTCTCACAGGATATGGCTCAGGGTCGAAGTTAAAAGTGCCTGAACTGAGTTTAAAAGGCACCCAGCATGTCATGCAAGCAGGCCAGACTCTCTTTCTCAAGTGCAGAGGGGAGGCAGCCCACTCATGGTCTCTGCCCACGACCGTGAGCCAGGAGGACAAAAGGCTGAGCATCACTCCCCCATCGGCCTGTGGGAGGGATAACAGGCAATTCTGCAGCACCTTGACCTTGGACACGGCGCAGGCCAACCACACGGGCCTCTACACCTGTAGATACCTCCCTACATCTACTTCGAAGAAAAAGAAAGCGGAATCTTCAATCTACATATTTGTTAGTGATGCAGGG…
ENSMUSG00000001506	Col1a1	0.6399707722690978	collagen, type I, alpha 1 [Source:MGI Symbol;Acc:MGI:88467]	ATGTTCAGCTTTGTGGACCTCCGGCTCCTGCTCCTCTTAGGGGCCACTGCCCTCCTGACGCATGGCCAAGAAGACATCCCTGAAGTCAGCTGCATACACAATGGCCTAAGGGTCCCCAATGGTGAGACGTGGAAACCCGAGGTATGCTTGATCTGTATCTGCCACAATGGCACGGCTGTGTGCGATGACGTGCAATGCAATGAAGAACTGGACTGTCCCAACCCCCAAAGACGGGAGGGCGAGTGCTGTGCTTTCTGCCCGGAAGAATACGTATCACCAAACTCAGAAGATGTAGGAGTCGAGGGACCCAAGGGAGACCCTGGCCCCCAAGGCCCAAGGGGACCCGTTGGCCCCCCTGGACGAGATGGCATCCCTGGACAGCCTGGACTTCCTGGTCCT…
ENSMUSG00000031245	Hmgn5	0.7720885086919204	high-mobility group nucleosome binding domain 5 [Source:MGI Symbol;Acc:MGI:1355295]	ATGCCCAAAAGAAAGGCTGCAGGTGATGTGAGCCAGGAGCCAAAGAGAAGATCAGCCCGACTGTCTGCTATGCCTGTGCCCTTTACACCGGAGTTGAAACCTAAAAGAGCATCAACTTCAAGGAAAACCAAGACCACAAATGTCGTGGAAGAAAACAAAGATGCAAGTACCATACCAATTCCTGAAACCAAGCCAGAAGATGTTAAAGACGAATGCAACATGGAAAATGCTGAAAATGGAGAAGCCAAGATTATGGAGGCACCCATTCCTAAAATGGAAGCTGAGGAAGTAAAAGAACAGATAAATGAAGACACTGAAGAAGATGGAGGAGAAAAGAAAGAAGCAGTGGCAGCAGAAGCCAAAGATGATGAGCTAAAAGCAAACATTCAAGATGTGGAG…
ENSMUSG00000051220	Ercc6l	-0.37845658144817873	excision repair cross-complementing rodent repair deficiency complementation group 6 like [Source:MGI Symbol;Acc:MGI:2654144]	ATGGAGGCTTCCCAAGGCTTAGCGGAAGTGGAGACTTTGAGCCCACAACTGGCCGAGAGTTACCTGAGATATGTGCAAGAAGCCAAAGAAGCAGCTAAGAATGGAGATCTGGAAGAATCATTGAAACTTTTCAATTTGGCAAAGGACATTTTTCCCACCAAAAAGGTGATGAGCAGAATCCAGAAACTCCAGGAAGCTTTGGAGCAGTTGGCAGAAGAAGAAGATGATGATGAATTTATAGATGTGTGCAGCTCTGGCTTGCTGCTTTACCGAGAGCTGTATGAGAAACTCTTTGAGCACCAGAAAGAAGGCATCGCTTTTCTCTATAGCCTGTATAAGGATGGAAGAAAAGGGGGCATCTTAGCAGATGATATGGGACTGGGGAAGACTGTTCAGATC…
ENSMUSG00000046049	Rp1l1	-0.5191584121257827	retinitis pigmentosa 1 homolog like 1 [Source:MGI Symbol;Acc:MGI:2384303]	ATGAACAGCACCCCAGGAGACACGAGGGATGCTCCTGCACCAAGCCACCCTGCACCAAGCCACCGGCAGTGTCTCCTGCCCTCCGTGGCTCACACTCCCTCCGTTACTGAGGTGACACCGGCCAAGAAGATAACCTTCCTCAAGCGAGGTGATCCCCAGTTTGCTGGGGTTCGCCTGGCTGTTCACCAGCGCACCTTCAAGACCTTCAGCTCCCTAATGGATGAGCTGTCTCAGCGCATGCCTCTTTCCTTTGGGGTGCGTTCCGTCACCACACCCCGGGGCTTGCATGGCCTCAGTGCCCTGGAGCAGCTGCAAGATGGGGGCTGCTACCTCTGCTCTGATAGGAAGCCCCCCAAAACCTCCAGAGAGCCAGGCCGGCTTCAACGGAAAAGCCCCTCT…
ENSMUSG00000005681	Apoa2	0.6261605528138451	apolipoprotein A-II [Source:MGI Symbol;Acc:MGI:88050]	ATGAAGCTGCTCGCAATGGTCGCACTGCTGGTCACCATCTGTAGCCTGGAAGGAGCTTTGGTTAAGAGACAGGCAGACGGACCGGATATGCAGAGCCTGTTCACTCAATACTTTCAGAGCATGACTGATTATGGCAAAGATTTGATGGAGAAGGCCAAGACCTCAGAGATTCAGAGCCAGGCCAAGGCATACTTTGAGAAGACACACGAGCAGCTGACACCCCTTGTCAGGTCAGCAGGAACTAGTCTGGTGAACTTCTTCAGCAGTTTAATGAACCTTGAGGAGAAACCGGCTCCTGCGGCTAAGTGA
ENSMUSG00000090774	Vmn2r74	-0.11972032227676141	vomeronasal 2, receptor 74 [Source:MGI Symbol;Acc:MGI:3643877]	ATGTTCTTCTTGAACTCTGTCTTCTGGCTTCTGAAGATTTCTTTTAATTTTGGTCATTTGAGTGACCCCAGATGCTTTTGGAGAATAAAAGACACTGAAAATAAACTAGGAGATAAAGAAACTTATTGTTTCTTTACTATTTCCACAAAACATGGTTATGTGAAGAATGATTATTTCCGTTGGAATCTAGACAAGAAGGTGACACCCAAGACCAGGCATTTGATTTTCTCTGTTTATCTTGCCTTGGAAGAAATAAATAAGAACTGCCATATTTTACCCAACATTTCTCTGGTAGTTAATATTGAGTGTGTCCTAGACAAACATGATGAGAAAACTGATTTTCTTTTTAAAAGTGAAGATCTTATTCCTAATTACTACTGCAAAAATGAGAGAAGATAT…
ENSMUSG00000037544	Dlgap5	-0.5148222736225908	DLG associated protein 5 [Source:MGI Symbol;Acc:MGI:2183453]	ATGCTGGTGTCACGTTTTGCCAGTCGGTTTCGGAAAGACTCGAGCACTGAGATGGTTAGAACCAACTTGGCTCATAGAAAGTCTCTGTCTCAGAAGGAGAACAGACACAGGGTGTATGAGCGAAACAGACACTTCGGTTTGAAGGACGTCAACATTCCACTGGAAGGGCGAGAGCTTGGTAATATACACGAGACATCGCAAGACCTCTCTCCAGAGAAGGCCAGCTCCAAAACAAGGTCAGTAAAAATGGTCCTGAGTGACCAACGGAAGCAGCTCCTCCAGAAGTACAAGGAAGAAAAACAACTTCAAAAACTGAAAGAACAGCGAGAGAAAGCCAAACGTGGAGTGTTCAAAGTGGGTCTCTATAGACCCGCTGCGCCTGGCTTTCTTGTCACAGAC…
ENSMUSG00000044957	Pp2d1	-0.4017596602302981	protein phosphatase 2C-like domain containing 1 [Source:MGI Symbol;Acc:MGI:3612067]	ATGAATTGGGAACTGTATTCTTCTCCTTTAAGAGTGTTTTGGAGATCAAAAGTGTGGGATGAGAAAACTTCAACATTTACTTCTGATGAGAATCTCAAGATTGGCAAAATGGTTGGCAAAAGGAGAAGGCCTAGACCAAAGCGCTCCATCGACCTGGAGGATTCCACTGAGCAGCTGATTTCTGGTGACATGGTCACATTCCCCTGCTCTGTCTGCTACCGAGAACTGAACAAAGCTAGGAATTTTCTCCATAAGAAACATCACAATGCTCTGAGTATGCTGGGTTTCCAGTGGATGGGAGGGAGGCAACCAAAGCCCAAACTGGTCAGTCTTCATAGAGAGTGTATAATCTCTAACCTTTTGAGATCTTCTACATACAATGAAAAAGTCCTTCACAAT…
ENSMUSG00000024222	Fkbp5	0.4287463541364326	FK506 binding protein 5 [Source:MGI Symbol;Acc:MGI:104670]	ATGACTACTGATGAGGGCACCAGTAACAATGGAGAGAACCCAGCAGCCACCATGACTGAGCAGGGTGAAGATATCACTACGAAGAAAGACAGAGGAGTATTAAAGATTGTCAAAAGAGTGGGGACTAGTGACGAGGCCCCAATGTTTGGTGACAAAGTTTATGTCCACTACAAAGGGATGTTGTCAGATGGAAAGAAGTTTGATTCCAGTCATGACAGAAAGAAGCCATTTGCCTTTAGCCTTGGCCAAGGCCAGGTTATCAAAGCCTGGGACATTGGGGTGTCTACTATGAAGAAAGGCGAGATCTGCCATTTATTATGTAAACCAGAATATGCTTATGGCTCGGCTGGCCACCTCCAAAAAATTCCATCAAATGCAACTCTCTTTTTTGAGATTGAG…
ENSMUSG00000031320	Rps4x	0.8440126498284611	ribosomal protein S4, X-linked [Source:MGI Symbol;Acc:MGI:98158]	ATGGCTCGTGGTCCCAAGAAACACCTGAAGCGTGTAGCTGCTCCAAAACATTGGATGCTGGATAAGTTGACTGGCGTGTTTGCTCCTCGTCCATCCACTGGTCCTCACAAGCTGAGGGAATGCCTGCCTCTCATCATTTTCCTAAGGAACAGACTTAAGTATGCCCTGACTGGAGATGAAGTAAAAAAGATTTGCATGCAGCGATTCATTAAGATTGATGGGAAAGTCAGGACCGATATAACCTACCCTGCTGGGTTTATGGATGTCATCAGCATTGACAAGACCGGAGAGAACTTCCGTCTGATCTATGACACCAAGGGTCGCTTTGCTGTTCATCGTATTACACCGGAGGAGGCCAAGTACAAGTTGTGCAAAGTGAGAAAGATCTTTGTAGGCACA…
ENSMUSG00000051989	Smim11	0.6660379873251424	small integral membrane protein 11 [Source:MGI Symbol;Acc:MGI:1916186]	ATGAACTGGAAGGTTCTTGAACACGTGCCCCTGCTGCTGTATATCCTGGCGGCAAAAACCCTGATCCTGTGCCTGGCCTTTGCGGGCGTGAAAATGTACCAAAGGAGAAGCCTGGAAGGAAAACTGCAAGCAGAGAAGAGGAAGCAGTCAGAGAAGAAAGCGAGCTGA
ENSMUSG00000054675	Tmem119	-0.1087046467826008	transmembrane protein 119 [Source:MGI Symbol;Acc:MGI:2385228]	ATGGTCCCCTGGTTCCTCCTGTCTCTGCTGCTACTTGCGAGGCCTGTGCCTGGGGTGGCCTACTCTGTGTCACTCCCGGCCTCCTTCCTGGAGGATGTAGCCGGCAGCGGGGAAGCTGAGGGTTCTTCAGCCTCTTCCCCGAGCCTGCCGCCGCCTGGGACTCCAGCCTTCAGTCCCACACCGGAGAGACCCCAGCCCACAGCTCTGGACGGCCCCGTGCCACCCACCAACCTCCTGGAAGGGATCATGGATTTCTTCCGGCAGTACGTGATGCTCATCGCGGTGGTGGGCTCGCTGACCTTCCTCATCATGTTCATAGTCTGCGCCGCCCTCATCACGCGCCAGAAGCACAAGGCCACAGCCTACTACCCATCCTCGTTCCCTGAAAAGAAGTATGTG…
ENSMUSG00000028017	Egf	-0.5324055576990808	epidermal growth factor [Source:MGI Symbol;Acc:MGI:95290]	ATGCCCTGGGGCCGAAGGCCAACCTGGCTGTTGCTCGCCTTCCTGCTGGTGTTTTTAAAGATTAGCATACTCAGCGTCACAGCATGGCAGACCGGGAACTGTCAGCCAGGTCCTCTCGAGAGAAGCGAGAGAAGCGGGACTTGTGCCGGTCCTGCCCCCTTCCTAGTTTTCTCACAAGGAAAGAGCATCTCTCGGATTGACCCAGATGGAACAAATCACCAGCAATTGGTGGTGGATGCTGGCATCTCAGCAGACATGGATATTCATTATAAAAAAGAGAGACTCTATTGGGTGGATGTAGAAAGACAAGTTTTGCTAAGAGTTTTCCTTAACGGGACAGGACTAGAGAAAGTGTGCAATGTAGAGAGGAAGGTGTCTGGGCTGGCCATAGACTGGATA…
ENSMUSG00000054414	Slc30a7	-0.11747964414106801	solute carrier family 30 (zinc transporter), member 7 [Source:MGI Symbol;Acc:MGI:1913750]	ATGTTGCCCCTGTCCATCAAGGATGATGAATACAAACCACCCAAGTTCAATCTGTTCGGCAAGATCTCAGGCTGGTTTAGGTCCATCCTGTCGGACAAGACATCCCGGAACCTGTTTTTCTTCCTGTGCCTGAACCTCTCTTTCGCTTTTGTGGAACTACTCTACGGCATCTGGAGCAACTGCCTAGGCTTGATCTCCGACTCCTTCCACATGTTTTTTGATAGTACTGCCATATTGGCCGGATTGGCAGCTTCTGTTATTTCAAAGTGGAGAGATAATGACGCTTTCTCTTATGGGTATGTTAGAGCAGAAGTCCTGGCTGGCTTTGTCAATGGGCTGTTTTTGATCTTCACTGCTTTCTTTATTTTCTCAGAAGGAGTCGAGAGAGCATTGGCTCCT…
ENSMUSG00000053897	Slc39a8	0.09585311410591837	solute carrier family 39 (metal ion transporter), member 8 [Source:MGI Symbol;Acc:MGI:1914797]	ATGGCTCCGGGCCGGGCAGTGGCCGGGCTGCTGCTGCTGGCGGCCACCAGCCTGGGACACCCCTCGGAGGGACCGGAGCTCGCCTTCAGTGAGGATGTGCTGAGCGTGTTCGGCGCCAACCGGAGCCTGTCGGCCGCGCAGCTGGGGCGCCTGCTGGAGCGTCTGGGGGCTGCATCCCAGCAGGGAGCGCTGGACCTGGGCCAGCTGCACTTCAACCAGTGTTTGTCAGCAGAAGACATCTTTTCTCTTCATGGTTTCTCAAATGTCACCCAGATAACCAGCTCGAACTTCTCTGCCATCTGCCCCGCGATCTTACAGCAGCTGAACTTCCATCCCTGCGAGGATCTAAGAAAGCACAACGCAAAGCCCAGTCTTTCCGAAGTCTGGGGCTATGGATTC…
ENSMUSG00000031246	Sh3bgrl	0.4973004609173918	SH3-binding domain glutamic acid-rich protein like [Source:MGI Symbol;Acc:MGI:1930849]	ATGGTGATCCGTGTATATATTGCATCTTCTTCTGGCTCTACGGCGATTAAGAAGAAACAGCAAGATGTGCTTTGTTTCTTAGAAGCCAACAAAATAGGATTTGAAGAAAAAGATATTGCAGCTAATGAAGAGAATCGGAAGTGGATGAGAGAAAATGTACCTGAAGACAGTCGACCATCCACAGGGTACCCCTTGCCACCTCAGATTTTCAATGAATGCCAGTACCGTGGGGATTACGATGCCTTCTTTGAAGCCCGAGAAAATAATGCAGTTTATGCCTTTTTAGGCTTGACAGCACCACCTGGTTCAAAGGAAGCCGAAGCCCAGGCAAATCAGCAAGCATGA
ENSMUSG00000014601	Strip1	-0.07307688821537325	striatin interacting protein 1 [Source:MGI Symbol;Acc:MGI:2443884]	ATGGAGCCGGCAGCCGCCGGTCCCGGCCCTCTGATTGTGAACAACAAGCAGCCGCAGCCGCCACCTCCTCCGCCGCCTGCCACCGCGCAGCCTCCTCCTGGGGCGCCGAGGGCCGCCGGAGGCCTCCTGCCGGGGGGCAAAGCCCGCGAGTTCAACCGCAACCAGCGCAAAGACTCGGAGGGCTATTCCGAATCTCCAGACCTGGAGTTTGAGTATGCCGACACAGACAAGTGGGCTGCAGAGCTTGCAGAGCTTTACAGCTACACAGAAGGACCAGAATTCCTGATGAATCGAAAATGCTTTGAGGAGGACTTCCGGATCCATGTGTCAGACAAGAAGTGGACTGAGCTGGATACCAACCAGCACCGGACCCACGCCATGAGGCTTCTGGATGGCTTG…
ENSMUSG00000033854	Kcnk10	0.3697145406224476	potassium channel, subfamily K, member 10 [Source:MGI Symbol;Acc:MGI:1919508]	ATGTATTTTTCCTACATAGGTTACTTCTTTCTTCCTCCTTTGGTGGCCGTGCCTGCAGCAGCCCCACCAGTGTGCCAGCCCAAGAGTGCCACTAACGGGCATCACCCTGTTCCTCGACTCTCCATTTCCTCTCGAGCCACGGTGGTAGCCAGGATGGAAGGCGCCTCCCAGGGAGGCCTGCAAACAGTTATGAAGTGGAAAACAGTGGTTGCCATCTTCGTGGTGGTCGTGGTCTACCTCGTCACTGGTGGCCTTGTCTTCCGGGCCTTGGAACAGCCCTTCGAGAGCAGTCAGAAGAACACAATCGCCTTGGAGAAGGCAGAATTCTTGAGAGATCACATCTGTGTGAGTCCCCAGGAACTAGAGACACTGATTCAGCATGCACTCGATGCTGATAAC…
ENSMUSG00000094672	Vmn2r25	-0.13873425162569938	vomeronasal 2, receptor 25 [Source:MGI Symbol;Acc:MGI:3644645]	ATGAAATTACTCATTGCTTTCTCCCCCCTAGTTGTTCTCATTTTATTCCAGGAACATATTTCTTGTTACTACTTAACTAAATATGCTTCTTCTGGCTACTATCAAGATGCAGATTTTGTTATTGGAGGACTCTTTTCCCTTAGAGTGACTGATGGAAATACATTTATAAGTAGATCTGGCATTGAAGATACAAGCCATATACCAGAATATGTTTTTGCGGATCTCATTAAACATTATCAGCACATTTTAGCAATGGTTTTTGCTATAGAAAAAATCAACAAGGACCCAAATATTCTATTCAATAAGTCCCTGGGATTCTTTCTCTTCAATGTCAACTTCATTGAGATGAAGGCTGTGGAAGGTTCTATGGCTTTGCTCTCAGGAGAGAGCCCCCCAATT…
ENSMUSG00000040276	Pacsin1	0.26603452980859843	protein kinase C and casein kinase substrate in neurons 1 [Source:MGI Symbol;Acc:MGI:1345181]	ATGTCTGGCTCCTACGATGAGGCCTCAGAGGAGATCACAGATAGCTTCTGGGAGGTGGGGAACTACAAGCGGACGGTGAAGCGCATCGACGATGGGCACCGCCTGTGCAACGACCTCATGAGCTGCGTGCAGGAGCGCGCCAAGATCGAGAAGGCATACGCGCAGCAGCTCACCGACTGGGCCAAGCGCTGGCGCCAGCTCATCGAGAAAGGTCCTCAGTATGGCAGCCTGGAGCGGGCGTGGGGCGCCATGATGACAGAAGCAGATAAGGTCAGCGAGCTGCACCAGGAGGTGAAGAACAGCCTGCTGAATGAGGACCTGGAGAAAGTCAAGAACTGGCAGAAGGATGCCTATCACAAGCAGATCATGGGTGGCTTCAAGGAGACGAAAGAGGCCGAG…
ENSMUSG00000048621	Gm6377	-0.412798311772108	predicted gene 6377 [Source:MGI Symbol;Acc:MGI:3647255]	ATGCTTGGAGAAGCCTTCCTAACTAAATTCCTCTACAAAGAACAGAGACATGCAAAACTTTACAAACCACTAAGATGTAAGAAGACATCAAATGACAAAAAGGAAAATTGGGAAAATAAGCTTTTAGATACACCGGACAATTCACTTTCCCCTTTAAAGACTGGAAGCCAAGAGAAAGTTATAGAAGGAAGTGTAACTGAACAAGACAATGATTCATCTCAAATCAAATCTATGGATGAGCTACCTGTTGCAAAATGCAAATGTACACCTCTTCCAGGAAATGTATCTGTTGCATTGCCCATTCCAAAGAGGGGACAGGAGGAAACACAACTGGATTTATATCGATCTTGGTCATGTACAAGTATTTGCCAGAATTATCCTGACCTACAGATAGGAGGT…
ENSMUSG00000010406	Mrpl52	0.1330224114605675	mitochondrial ribosomal protein L52 [Source:MGI Symbol;Acc:MGI:1916086]	ATGGCTGCCTTAGGGACCTGGCTGTCCAGTGTCCGGAGATTGCACTGCAGCGTAGTGGCGCGGGCCGGTGGCCAGTGGCGACTCCAGCAAGGGCTGGCTGCCAACCCTTCCGGCTATGGGCCCCTCACGGAGCTCCCTGACTGGTCCTTCGCGGATGGCCGCCCTGCACCCCCAATGAAAGGCCAACTTCGAAGAAAAGCTCAAAGGGAGAAGCTTGCAAGACGAGTTGTACTGCTGACACAGGAAATGGATGCTGGAATACAGGCATGGAAGCTCAGGCAGCAGAAATTGCAGGAAGAAAGGAAGAAGGAACATGATCTCAAACCTAAAGGGACTTTACTGAGAAGCCCACTTCCGAATCAATAA
ENSMUSG00000072780	Vmn2r24	-0.2409497023876229	vomeronasal 2, receptor 24 [Source:MGI Symbol;Acc:MGI:3647530]	ATGAAATTGCTCATTGCTTTCTCTCCTCTGATTGTTCTCATTTTTTTCCAGGAACAAATTTCCTGTTTTTACTTAGCTAAATCTGCTTCTTCTGGCTACTATCAAGATGGGGATTTTGTTATTGGAGGACTCTTTAGCCTTAGAATGACTCTTGGTGGACACCTTAAACCTAAAATTCTCTTTAAAGATAAAACGGATACACTGGATGTTGTTCATGTGGATCTCACCAGACATTATCAGCACATTTTGGCAATTGTTTTTGCTATAGAAAATATCAACAAGGACCCACATATTTTATTCAATATGTCCCTGGGCTTCTATCTCTTCAATGTTAACTTTATTGAGACAAAGGCCATGGAAAGTTCTATGGGTTTGCTCTCAGGAGAGAGCCCCCCAATT…
ENSMUSG00000009418	Nav1	-0.5888944166885909	neuron navigator 1 [Source:MGI Symbol;Acc:MGI:2183683]	ATGAGTGGGATGGCCAACGTGAATTCTGCCAGCCGCCCACACTATGCTTCCTCTATCCCCGTGCCTCGAGCCTCCTCCCAGACCAGGATTCACACCCCAGGCGCATCTCCCCAGCTGCGGCCTCGCCAACAGGCTGACCTGGCCCTGAGTCCCCAGCGAGGAGCCTCCCCAAGACGGGGCAAGGCTGCAGTCTCTTCTAGAAACTCATCCCCCAAGGCTTACAGGGGAAGAGGAACCCCCAGGGCTGCCGGGCCAGCCAGAGAACTGGCTGGGAGTGTAGAAAGCCTTCCCAGCTCCCCCTGGAACAGCCCCAGGGTAACCCCCAAAACAGCCCTCTCCAGTCAGGCAGGATCCAGAAGAGCTGGGGAGACACAAAGCACCCAGAGGAAGAAGACCCAG…
ENSMUSG00000020163	Uqcr11	0.6907652323828618	ubiquinol-cytochrome c reductase, complex III subunit XI [Source:MGI Symbol;Acc:MGI:1913844]	ATGCTGAGCAGGTTTCTAGGCCCGCGCTACCGGGAACTGGCCAGAAACTGGATTCCCACAGCCGGCATGTGGGGCACTGTGGGTGCCGTGGGACTGGTGTGGGCCACGGACTGGCGGCTGATCCTGGACTGGGTGCCTTACATCAACGGCAAGTTTAAGAAGGACGATTAG
ENSMUSG00000057346	Apol9a	0.035628607397129836	apolipoprotein L 9a [Source:MGI Symbol;Acc:MGI:3606001]	ATGGCAAGCAGTGGATACCTGTATAGCCTGGTGGCTGAAGATGGAGTCTGGCAGGCGTTTGTATCCAAGGCCAAGTTGTCCAGGGAGAGAGCAGTGGCCCTCCACAAAGCTCTGAGGGAACTGACAGCGCTCTTGGCCATAGCAGACAGAGGCAGACTTCAAAAAGGTCTGAAAGGCAGGGAGAAGTTTTTGAAAGTCTTTCCTCGCTTGAAAGCAGAGCTGGTGGAGCATATCAGTCAGCTCCATGCCCTGGCTGACCACGCTGAGAAACTACACAGGGGCTGCACCATCTCCAACGTGGTGGCTGACTCCTTCAGTGCTGCCTCTGACATCCTGAGCCTCCTTGGTCTCTTTCTGGCACCTGTGACAGCAGAGGGAAGTCTGGTGCTCTCAGCAACT…
ENSMUSG00000022099	Dmtn	-0.18991981974462577	dematin actin binding protein [Source:MGI Symbol;Acc:MGI:99670]	ATGGAACGTCTGCAGAAGCAACCTCTTACCTCCCCGGGGAGCGTCAGCTCCTCCAGAGACTCCAGTGTGCCCGGCTCTCCCTCCAGCATCGTGGCCAAGATGGACAACCAGGTGTTGGGCTACAAGGATCTGGCTGCCATCCCCAAGGACAAGGCCATCCTGGACATTGAGCGACCTGACCTCATGATCTATGAGCCCCACTTTACCTATTCCCTCCTGGAACATGTAGAGCTGCCCAGAAGCCGGGAGTGCTCACTGTCACCCAAATCCACATCCCCCCCACCGTCTCCAGAGGTGTGGGCGGAGAGCCGGACTCTTGGAATCATCTCTCAGGCTTCAACCCCAAGGACCACAGGGACCCCCAGGACCAGCCTGCCCCACTTCCACCACCCTGAGACT…
ENSMUSG00000009585	Apobec3	-0.31337090552660174	apolipoprotein B mRNA editing enzyme, catalytic polypeptide 3 [Source:MGI Symbol;Acc:MGI:1933111]	ATGCAACCCCAGCGCCTGGGGCCCAGAGCTGGGATGGGACCATTCTGTCTGGGATGCAGCCATCGCAAATGCTATTCACCGATCAGAAACCTGATATCTCAAGAAACATTCAAGTTCCACTTTAAGAACCTAGGCTATGCCAAAGGCCGGAAAGATACCTTCTTGTGCTATGAAGTGACTAGAAAGGACTGCGATTCACCCGTCTCCCTTCACCATGGGGTCTTTAAGAACAAGGACAACATCCACGCTGAAATCTGCTTTTTATACTGGTTCCATGACAAAGTACTGAAAGTGCTGTCTCCGAGAGAAGAGTTCAAGATCACCTGGTATATGTCCTGGAGCCCCTGTTTCGAATGTGCAGAGCAGATAGTAAGGTTCCTGGCTACACACCACAACCTG…
ENSMUSG00000020137	Thap2	-0.537369416687646	THAP domain containing, apoptosis associated protein 2 [Source:MGI Symbol;Acc:MGI:1914066]	ATGCCGACCAATTGCGCCGCGGCGGGCTGTGCTGCTACCTACAACAAGCACATTAACATCAGCTTCCACAGGTTTCCTTTGGATCCTAAAAGAAGAAAAGAATGGGTTCGCCTGGTTAGGCGCAAAAATTTTGTGCCAGGAAAACACACTTTTCTTTGCTCAAAGCACTTTGAAGCCTCCTGTTTTGATCTAACAGGACAAACCCGACGACTTAAAATGGATGCTGTTCCAACCATTTTTGATTTTTGTACCCATATAAAGTCTCTGAAACTCAAGTCAAGGAATCTTCTGAAGACAAACAACAGTTTTCCTCCAACTGGACCATGTAATTTAAAGCTGAACGGCAGTCAGCAAGTACTGCTTGAACACAGTTATGCCTTTAGGAACCCTATGGAGGCG…
ENSMUSG00000058715	Fcer1g	0.2268404186107056	Fc receptor, IgE, high affinity I, gamma polypeptide [Source:MGI Symbol;Acc:MGI:95496]	ATGATCTCAGCCGTGATCTTGTTCTTGCTCCTTTTGGTGGAACAAGCAGCCGCCCTGGGAGAGCCGCAGCTCTGCTATATCCTGGATGCTGTCCTGTTTTTGTATGGTATTGTCCTTACCCTACTCTACTGTCGACTCAAGATCCAGGTCCGAAAGGCAGCTATAGCCAGCCGTGAGGTATGGAGTCTCCCACGTCTACATGTCAGCGTTTCTTTTCTGGCTTTCAACCTTTCCCGGGGCCTTAGCCTGAGAAAGCAGATGCTGTCTACACGGGCCTGA
ENSMUSG00000026883	Dab2ip	-0.45847950572619467	disabled 2 interacting protein [Source:MGI Symbol;Acc:MGI:1916851]	ATGTCCGCCGGCGGCAACGCCAGGAAGAGCACCGGGAGGCCATCCTACTACTACCGGCTGCTGCGGCGGCCCCGGCTGCAGCGACAGAGGAGCCGCTCCCGCAGCCGGACCCGGCCAGCCAGGGAGTCGCCCCAAGAAAGGCCGGGCTCCCGGCGGAGCCTTCCCGGCAGCATGTCAGAGAAAAACCCCAGCATGGAGCCCTCGGCTTCAACCCCGTTCCGGGTCACGGGCTTCCTCAGCCGCCGCCTCAAGGGCTCCATCAAGCGCACCAAGAGCCAGCCCAAACTGGACCGCAACCACAGCTTCCGCCACATCCTGCCGGGGTTCCGGAGCGCAGCCGCCGCCGCCGCGGACAATGAGAGGTCCCATCTGATGCCAAGGCTGAAGGAGTCTCGGTCA…
ENSMUSG00000036934	4921524J17Rik	-0.3377983559123484	RIKEN cDNA 4921524J17 gene [Source:MGI Symbol;Acc:MGI:1913964]	ATGTCTGCAACTCGAGCCAAGAAAGTGAAGATGGCCACCAAATCGTGCCCCGAGTGCGACCAACAGATTCCTGTTGCGTGTAAATCATGTCCCTGTGGTTACATATTTATTAGCAGAAAACTACTAAATGCAAAACATTCAGAGAAATCACCGCCGTCTACAGAAAACAAGCACGAGGCCAAGAGGAGGCGAACAGAGAGAGTTAGGCGAGAGAAGATAAATTCTACAGTAAATAAAGATTTAGAAAACAGAAAGAGATCTCGAAGTAACAGCCATTCAGATCATATCAGACGAGGGAGAGGACGACCTAAAAGTTCATCCGCCAAAAAACACGAGGAAGAGAGAGAAAAACAGGAAAAGGAAATCGACATCTATGCTAACCTCTCTGATGAGAAGGCT…
ENSMUSG00000038312	Edem2	0.08482046634593435	ER degradation enhancer, mannosidase alpha-like 2 [Source:MGI Symbol;Acc:MGI:1915540]	ATGCCTTTCCGGCTACTCATCCCGCTCGGCCTCGTGTGCGTGCTGCTACCCCTGCACCATGGTGCGCCAGGCCCCGACGGCACCGCGCCCGACCCCGCCCACTACAGGGAGCGAGTCAAGGCCATGTTCTACCACGCCTACGACAGTTACCTGGAAAATGCCTTTCCCTACGATGAGCTGAGACCTCTCACCTGTGATGGGCACGACACCTGGGGCAGTTTTTCTCTGACGCTAATTGATGCCCTGGACACCTTGCTGATTTTGGGGAATACCTCTGAATTCCAAAGAGTAGTGGAGGTTCTTCAGGACAATGTGGACTTTGATATCGACGTGAACGCCTCTGTGTTCGAAACCAACATCCGAGTGGTAGGAGGACTCCTTTCTGCTCATCTCTTGTCA…
ENSMUSG00000027187	Cat	0.2261956855476606	catalase [Source:MGI Symbol;Acc:MGI:88271]	ATGTCGGACAGTCGGGACCCAGCCAGCGACCAGATGAAGCAGTGGAAGGAGCAGCGGGCCTCGCAGAGACCTGATGTCCTGACCACCGGAGGCGGGAACCCAATAGGAGATAAACTTAATATCATGACCGCGGGGTCCCGAGGGCCCCTCCTCGTTCAGGATGTGGTTTTCACTGACGAGATGGCACACTTTGACAGAGAGCGGATTCCTGAGAGAGTGGTACACGCAAAAGGAGCAGGTGCTTTTGGATACTTTGAGGTCACCCACGATATCACCAGATACTCCAAGGCAAAGGTGTTTGAGCATATTGGAAAGAGGACCCCTATTGCCGTTCGATTCTCCACAGTCACTGGAGAGTCAGGCTCAGCTGACACAGTTCGTGACCCTCGGGGGTTTGCA…
ENSMUSG00000023403	Stk31	-0.1588294375750464	serine threonine kinase 31 [Source:MGI Symbol;Acc:MGI:1924735]	ATGTGGGGCCAGCGGCTCTTTGCTGGGACGGCTGTGGCGCAAAGTGTAAGTTTTCCAGGACTTGTCCAAATGGATGAAGATACACATTACAATAAAGTTGAAGATGTTGTTGGAAGTCATGTAGAAGATGCAGTAACATTTTGGGCCCAGAATGTCAGTAAAAATAAGGATATTATGAAGATTGGTTGTTCACTCTCAGAAGTTTGTCCTCTTGCTAATTCAGTTTTTGGCAATCTTGATCCTAAGAAGATTTATGGTGGATTGTTTTCTGAAGATAAGTGCTGGTACAGATGCAAAGTGCTAAAAACTATCAGCGATGATAAGTGCCTGGTGAGGTACATTGACTATGGAAATACTGAAATTCTAAACCGATCTGATATAGTAGAAATTCCTCCGGAG…
ENSMUSG00000010830	Kdelr3	0.21734165079257675	KDEL (Lys-Asp-Glu-Leu) endoplasmic reticulum protein retention receptor 3 [Source:MGI Symbol;Acc:MGI:2145953]	ATGAACGTGTTCCGAATCCTCGGGGACCTGAGCCACCTCCTGGCTATGATCTTGCTCCTGGTGAAGATCTGGAGGTCCAAGAGCTGCGCCGGCATCTCTGGAAAGAGCCAGATTCTTTTCGCTTTGGTCTTTACCACCAGGTACCTGGACCTCTTCTCGAACTTCATCTCCATCTACAACACAGTGATGAAGGTGGTTTTCCTCCTCTGTGCCTATGTCACAGTGTACATGATCTATTGGAAGTTCCGGAAAACGTTTGACATTGAAAATGACACATTCCGGCTGGAGTTCCTCCTGGTCCCCGTGACTGGCCTTTCCTTTCTGGTGAACTACAGTTACACGCCGATGGAGGTCCTCTGGACCTTCTCCATCTATCTGGAGTCAGTGGCTATCCTGCCA…
ENSMUSG00000048163	Selplg	-0.1276223095009886	selectin, platelet (p-selectin) ligand [Source:MGI Symbol;Acc:MGI:106689]	ATGTCCCCAAGCTTCCTTGTGCTGCTGACCATCTTGGGCCCTGGCAACAGCCTTCAGCTGCAGGACCCCTGGGGGCATGAAACCAAGGAAGCCCCGGGTCCTGTGCATCTCCGGGAACGGAGGCAGGTGGTTGGGGATGACGATTTTGAGGACCCTGACTATACGTATAACACAGACCCCCCAGAATTGCTGAAAAATGTCACCAACACCGTGGCTGCTCACCCTGAGCTGCCAACCACCGTGGTCATGCTAGAGAGAGATTCCACGAGCGCTGGAACCTCCGAGAGAGCCACTGAGAAGATTGCCACCACTGACCCTACTGCCCCAGGTACAGGAGGGACAGCTGTTGGGATGCTGAGCACAGACTCTGCCACACAGTGGAGTCTAACCTCAGTAGAG…
ENSMUSG00000030505	Prmt3	0.07921931828231568	protein arginine N-methyltransferase 3 [Source:MGI Symbol;Acc:MGI:1919224]	ATGTGTTCGCTAGCGGCGGGGAACGGCCGTGGCGCCGAGCTGGGGCCGGAGCCCCTGGAACTGTCGGACAGCGGAGACGACGCGGGCTGGGAGGACGAGGACGCGGACACTGAGCCCGCGCACGGCCGGCAGCACACACCCTGCCTGTTCTGTGACAGGTTGTTCGCCTCTGCTGAGGAAACGTTTTCACACTGTAAGTTGGAGCATCAATTTAATATTGATAGTATGGTCCATAAACATGGACTTGAATTTTATGGATACATTAAACTAATAAATTTTATTAGACTTAAGAATCCTACGGTTGAATATATGAATTCCATATATAACCCTGTGCCTTGGGAAAAAGATGAGTACCTGAAGCCAGTGTTGGAAGATGACCTTTTGCTTCAGTTTGATGTA…
ENSMUSG00000028546	Elavl4	0.18795557086334294	ELAV like RNA binding protein 4 [Source:MGI Symbol;Acc:MGI:107427]	ATGGAGTGGAATGGCTTGAAGATGATAATTAGCACCATGGAGCCTCAGGTGTCAAATGGACCGACATCCAATACAAGCAATGGACCCTCCAGCAACAACAGAAACTGTCCTTCTCCCATGCAGACAGGCGCCGCCACAGATGACAGCAAAACCAACCTCATCGTCAACTATTTACCCCAGAATATGACCCAAGAGGAATTCAGGAGTCTCTTTGGGAGCATTGGTGAAATAGAATCCTGCAAACTCGTGAGAGACAAAATCACAGGACAGAGTTTAGGGTATGGATTTGTTAACTATATTGATCCAAAGGATGCAGAGAAAGCCATCAACACTTTAAATGGACTCAGACTCCAGACCAAAACCATAAAGGTGTCCTACGCCCGCCCAAGCTCGGCCTCG…
ENSMUSG00000034566	Atp5h	0.7596802040345593	ATP synthase, H+ transporting, mitochondrial F0 complex, subunit D [Source:MGI Symbol;Acc:MGI:1918929]	ATGGCTGGGCGTAAACTTGCTCTAAAAACCATTGATTGGGTATCTTTTGTGGAGGTCATGCCCCAAAACCAGAAGGCAATTGGAAATGCCCTGAAGTCCTGGAATGAGACCTTCCACGCCAGGTTGGCTAGTCTGTCTGAGAAACCACCTGCGATTGACTGGGCTTACTACAGGGCCAATGTGGCCAAGCCTGGCTTGGTGGATGATTTTGAAAAGAAGTATAATGCCCTGAAGATTCCTGTGCCTGAGGATAAATACACAGCCCTGGTGGACCAGGAGGAGAAGGAGGATGTGAAGAGCTGTGCTGAGTTTGTGTCTGGATCCCAGCTCAGGATCCAGGAGTATGAGAAGCAGCTGGAGAAAATGAGGAACATAATTCCCTTTGACCAGATGACCATT…
ENSMUSG00000057072	Spata45	0.18168385078370755	spermatogenesis associated 45 [Source:MGI Symbol;Acc:MGI:1922808]	ATGACATCCATGAACAAGGGCAACGAAGAGAAGACACAGGGAGCGAACAGGAAGCAGCTTCTGGAAGAGTTGAACGAGAAGCGCGAGTCCTACTGCCTGGTGGAAAGAAGCAACGAAGTCAACCTGCTGAGAGTTCAGAAGAGGCACTTCAGCAAGGCCTACCAGACCTTAGCTTGCATGCATATCAAAGAATCTGTTCCCGAAAGTACCAGGACCTCCTGGGTCAAGCATGATCTCTCTGTGCACAAGGAGAAAAGGCACTTTCTGCCAAAAAATAATGCCATATTTGGATGA
ENSMUSG00000062949	Atp11c	-0.09816159983125602	ATPase, class VI, type 11C [Source:MGI Symbol;Acc:MGI:1859661]	ATGTTCCGCCGGACCCTCAACCGTTTGTGTGCTGGAGAAGAGAAACGAGTTGGTACACGCACAGTGTTTGTTGGCAATCATCCCATTTCTGGAACAGAACCTTATATTGCGCAAAGATTTTGTGATAATAGAATAGTCTCATCTAAGTATACACTTTGGAATTTCCTCCCTAAGAATTTGTTTGAACAGTTTAGAAGAATTGCGAATTTTTATTTCCTCATCATTTTCCTTGTACAGGTCACAGTAGACACACCAACCAGCCCAGTTACCAGTGGACTTCCACTTTTTTTCGTTATAACTGTTACAGCAATCAAGCAGGGGTATGAAGATTGGCTTAGACACAGAGCTGATAATGAAGTTAACAAAAGTGCTGTTTATATTATTGAAAATGCAAAGCGA…
ENSMUSG00000038323	1700066M21Rik	-0.5190700051557505	RIKEN cDNA 1700066M21 gene [Source:MGI Symbol;Acc:MGI:1920717]	ATGCTGGGGTCGCGGCGTCTGCGGTCCCCCGCGCTGGTGCTGCTGCTGCTGCGGCCGCTGCTCGCTTCCGGAGACTCCGCGTCCCGCCTGCAGACCCGAGCCATGAACCCGGGCGGCGGTGAGCGGGGCTCCCCGGAGGACAGCCACCGTCTGCAGCGCTCCACGGTGCCGGGCTCCGACCCGCAGCGCAGCAACGAACTGCTCCTGCTGACATCCCGGGAAGGAGATTCCCCGGAGCAGCGGCACCACGTCCTCTACTTCCCTGGGGACGTGCAGAATTACCATGAGATTATGACTCGTCATCCTGAGAATTATCAATGGGAAAATTGGAGTCTAGAAAACATTGCTACCATTTTAGCCCGCCGTTTTCCCAATAGTTATATTTGGGTAATAAAGTGT…
ENSMUSG00000118415	Gm2411	-0.18892490548883165	predicted gene 2411 [Source:MGI Symbol;Acc:MGI:3809203]	ATGTTTATCAGCAAGAGAGCTGCAAGAAATAGGACCCTTGCTGGTTTCCACATATTTGATGCCAGCATGGTCCTGCTAAACAAGTCTGCCAATCACCAAATAAGAGGTTTCACTTTAGCTACAATAGCATGCATAATGTGCAATACCTCTATGGCCCTTCCAGAATGGCGAAATTGCTACTTGAACAACTCCATGCTTTCCTACCCAAGTCTGGCTTTTGTGAATATTTGGGAGGCCTACATCTGCCACCACAACCACAACTCAAGCCACCTGAGAGATTGCCATTGCTACACCTGCCATAATAACCTTGTTCCTTTGGATATCCGGGTATCTCAAATTCTGCTCCTGGTTGCAAACGTTGTTGGTCTGGTTGGGACAGTTTGTTCTGTCTTTGCTCTA…
ENSMUSG00000034403	Pja1	-0.3626533869289802	praja ring finger ubiquitin ligase 1 [Source:MGI Symbol;Acc:MGI:1101765]	ATGAGCCACCAGGAAAGGATTGCCAGCCAGAGGAGGACAACAGCCGAAGTCCCAATGCACAGATCAACTGCCAATCAAAGCAAGAGGAGCCGGTCACCATTTGCCAGCACACGTCGTCGCTGGGATGACAGCGAGAGCTCGGGAGCCAGCCTGGCTGTTGAGAGTGAGGATTATTCCAGGTATCCTCCAAGAGAGTACAGGGCCTCGGGGAGCCGAAGAGGATTGGCTTATGGACACATTGACACTGTAGTGGCTCGTGATAGTGAGGAGGAGGGGGCTGGGCCTGTTGACCGACTGCCAGTGAGAGGGAAAGCTGGCAAGTTTAAGGATGATCCCGAGAAGGGGGCAAGGTCTTCCCGCTTTACTAGTGTTAACCATGATGCGAAGGAAGAGTGTGGC…
ENSMUSG00000033308	Dpyd	0.1276767616386522	dihydropyrimidine dehydrogenase [Source:MGI Symbol;Acc:MGI:2139667]	ATGGCGGGTGTGCTGAGCAGGGACGCGCCGGACATCGAGAGTATCCTGGCTTTAAACCCTCGAGTACAAGCTCATGCAACTCTGCGTTCCACCGCAGCCAAGAAACTAGACAAGAAACACTGGAAAAGGAACACGGACAAGAACTGCTTTACCTGTGAGAAGCTGGAGAGTAATTTTGATGACATCAAGCACACGACTCTTGGTGAGCGAGGAGCTCTCCGAGAAGCAGTGAGATGCCTGAAGTGCGCAGATGCTCCCTGCCAGAAGAGCTGTCCCACATCTCTTGACATTAAATCATTTATCACAAGTATCGCCAACAAGAACTACTATGGTGCAGCTAAGCTGATTTTTTCTGATAACCCTCTTGGTCTTACTTGTGGAATGGTTTGTCCAACATCT…
ENSMUSG00000095474	Cldn34c2	-0.14397674467320085	claudin 34C2 [Source:MGI Symbol;Acc:MGI:3644765]	ATGTTTATCAGCAAGAGAGCTGCAAGAAATAGGACCCTTGCTGGTTTCCACATATTTGATGCCAGCATGGTCCTGCTAAACAAGTCTGCCAATCACCAAATAAGAGGTTTCACTTTAGCTACAATAGCATGCATAATGTGCAATACCTCTATGGCCCTTCCAGAATGGCGAATTTGCTACTTGAACAACTCCATGCTTTCCTACCCAAGTCTGGCTTTTGTGAATATTTGGGAGGCCTACATCTGCCACCACAACCACAACTCAAGCCACCTGAGAGATTGCCATTACTACACCTGCCATAACAACCTTGTTCCTTTGGATATCCGGGTATCTCAAATTCTGCTCCTGGTTGCAAATGTTGTTGGTCTGGTTGGGACAGTTTGTTCTGTCTTTGCTCTA…
ENSMUSG00000034623	Prss55	0.004134239025421229	protease, serine 55 [Source:MGI Symbol;Acc:MGI:1918287]	ATGATCCTGCCCTCCATCCTGCTACTTGTTGCCCACACCCTGGAAGCAAATGTTGAGTGTGGTGTGAGACCCCTGTATGATAGCAGAATTCAATACTCCAGGATCATAGAAGGGCAGGAGGCTGAGCTGGGTGAGTTTCCATGGCAGGTGAGCATTCAGGAAAGTGACCACCATTTCTGCGGCGGCTCCATTCTCAGTGAGTGGTGGATCCTCACCGTGGCCCACTGCTTCTATGCTCAGGAGCTTTCCCCAACAGATCTCAGAGTCAGAGTGGGAACCAATGACTTAACTACTTCACCCGTGGAACTAGAGGTCACCACCATAATCCGGCACAAAGGCTTTAAACGGCTGAACATGGACAACGACATTGCCTTGTTGCTGCTAGCCAAGCCCTTGACG…
ENSMUSG00000090436	Vmn2r75	-0.07738177271439248	vomeronasal 2, receptor 75 [Source:MGI Symbol;Acc:MGI:3648311]	ATGAAAAATACGTTCTCTTTGATCTCTGTCTTCTGGTTTCTGAAGATTTCCATTATTTTCTGTCATTTGAGTGACCCCAGATGCTTTTGGAGAATAAAAGACGCCAAAAATGATCTAGGAGATAAAGAAACTTATTGTTTCTTTTCTATTTACACTAAGCAAGGTTATGTGAAGAATGATTATTTCAGTTGGAATCTAGACAAGAAGGTGACACCCAAGACAAACCATTTAATTTTCTCTGTTTATCTTGCCATGGAAGAAATAAATAAGAATGGACATATTTTACCCAACATTTCTCTGCTAGTTAATATTGAATGTGGCCTAGAATTATATGGTGAGAGAACTGGTTTGGCATTTAAAAGTGAGGAATTTATTCCTAATTACTACTGCAGAAATCAT…
ENSMUSG00000022556	Hsf1	-0.25407780383249723	heat shock factor 1 [Source:MGI Symbol;Acc:MGI:96238]	ATGGATCTGGCCGTGGGCCCCGGTGCAGCGGGGCCCAGCAACGTCCCGGCCTTCCTAACCAAGCTGTGGACCCTCGTGAGCGACCCGGACACAGACGCGCTCATCTGCTGGAGCCCGAGTGGGAACAGCTTCCACGTGTTTGACCAGGGCCAGTTTGCCAAGGAGGTGCTGCCCAAGTACTTCAAGCACAACAACATGGCTAGCTTCGTGCGGCAGCTCAACATGTATGGCTTCCGAAAAGTAGTCCACATTGAGCAGGGTGGCCTGGTCAAGCCTGAGAGAGATGACACCGAGTTCCAGCATCCTTGTTTCTTGCGTGGACAGGAACAGCTCCTTGAGAACATCAAGAGGAAAGTGACCAGCGTGTCCACCCTGAAGAGTGAGGACATAAAAATACGC…
ENSMUSG00000090272	Mndal	0.05246783046278561	myeloid nuclear differentiation antigen like [Source:MGI Symbol;Acc:MGI:3780953]	ATGGCTGAATACAAGAAAATTGTTCTTCTAAAAGGATTAGAAAGCATGGAGGACTATCAGTTTAGGACAGTCAAGTCCTTACTAAGAAAAGAACTAAAACTTACTAAAAAATTGCAAGAAGATTATGATAGGATTCAGCTGGCGGACTGGATGGAGGACAAGTTCCCCAAATATGCTGGACTAGACAAACTGATAAAAGTGTGTGAGCACATAAAAGATCTTAAAGACCTTGCTAAAAAACTTAAAACCGAGAAGGCAAAAGTTCAAAAGAAAAAGCAAGGAAAATGCAAAACGGCTGTGAAAAAAAAAGGTCAAGATGAACTCAGTTCCTCCGAATCTCTTTTCATCAATAAAGAATCATACAAGAGTGTACCGTCTTCAAAGAAAAAGGGAAAAGCG…
ENSMUSG00000025323	Sp4	-0.46832134158676453	trans-acting transcription factor 4 [Source:MGI Symbol;Acc:MGI:107595]	ATGAGCGATCAGAAGAAGGAGGAGGAGGAGGAGGCGGCAGCGGCGATGGCTACAGAAGGAGGGAAAACCTCTGAGCCAGAGAATAACAATAAAAAACCCAAAACCTCAGGCTCCCAGGACTCTCAGCCCTCTCCTCTGGCTTTACTGGCAGCTACTTGCAGCAAAATAGGGACTCCTGGTGAAAATCAAGCAACTGGACAACAGCAGATTATTATAGATCCAAGCCAAGGATTGGTGCAACTTCAGAATCAGCCACAGCAGCTAGAACTGGTGACGACGCAGCTTGCTGGAAACGCTTGGCAACTTGTTGCCTCCACTCCTCCTGCTTCAAAAGAAAATAACGTTTCTCAGCCAGCTTCTAGTTCATCTAGTTCTTCCAGCAGTAATAACGGGAGTTCC…
ENSMUSG00000038997	Asb17	-0.35169722704473017	ankyrin repeat and SOCS box-containing 17 [Source:MGI Symbol;Acc:MGI:1914022]	ATGAATAACTCTTCTAAATTATGCCGGAAGACGTCTTTTCCAAGAAGCAATATATTCTGTAACCTTGTTGACAAGATAGTTAAGCGGCCCTCTCTGCAGTTTCTGGGCCAATGGGGATACCACTGCTATGAACCCAGGATTTACAGAACCCTGGCAAAAATCCTGAGGTATGTTGACTTGGACGGCTTTGACATACTCCTCACGGACTATATTGCTTTTGTGGAAAAGTCAGGACACCGTTTTGAACTCAACTTTAACCTTGAGTTTACTGAAATATGCGTGAATACCATTCTGTACTGGGTTTTCGCCAGGAAAGGTAATCCTGACTTCGTGGAACTGCTTCTCAAGAAGACGAAGGACTATGTCCAAGACAGAAGCTGCAGCCTGGCGCTGATATGG…
ENSMUSG00000021670	Hmgcr	-0.023629666299438943	3-hydroxy-3-methylglutaryl-Coenzyme A reductase [Source:MGI Symbol;Acc:MGI:96159]	ATGTTGTCAAGACTTTTCCGGATGCATGGCCTCTTCGTGGCCTCCCACCCCTGGGAAGTTATTGTGGGAACAGTGACACTTACAATCTGTATGATGTCCATGAACATGTTCACCGGCAACAACAAGATCTGTGGCTGGAATTATGAGTGCCCTAAATTTGAAGAGGACGTGCTGAGCAGCGACATCATCATCCTGACGATAACGCGGTGCATCGCCATCCTGTACATTTACTTCCAGTTCCAGAACCTACGGCAGCTTGGGTCCAAGTACATTCTGGGTATTGCTGGCCTCTTCACAATTTTCTCAAGCTTTGTCTTCAGTACAGTCGTCATTCATTTCCTCGACAAAGAACTGACAGGCTTAAATGAAGCTTTGCCCTTTTTTCTGCTCTTGATTGAC…
ENSMUSG00000052099	Prss51	-0.3343880962115017	protease, serine 51 [Source:MGI Symbol;Acc:MGI:1921465]	ATGATGCTCCCACTTCTAATTGCACTGCTCATGGCTTCCAAGGGACAAGCTAAGGACCAGCAAGAATCAGTTCTGTGTGGCCACAGACCTGCCTTCCCAAACTCATCATGGCTGCCATTGCGGGAGCTGCTTGAGGTCCAGCATGGTGAGTTCCCATGGCAAGTGAGTATCCAGATGCTTGGGAAACACCTGTGTGGAGGCTCCATCATCCACCGGTGGTGGGTTCTGACAGCAGCACACTGCTTCCCGAGAACCCTATTAGAACTGGTAGCAGTCAATGTCACTGTGGTCATGGGAATCAAGACTTTCAGTGACACCAACTTAGAGAGAAAACAAGTGCAGAAGATCATTGCTCACAGAGACTACAAACCGCCCGACCTTGACAGCGACCTCTGCCTG…
ENSMUSG00000028159	Dapp1	0.005452495778024782	dual adaptor for phosphotyrosine and 3-phosphoinositides 1 [Source:MGI Symbol;Acc:MGI:1347063]	ATGGGCAGAGCAGAACTTCTAGGAGGGAACATGAGTACCCAGGATCCCTCAGAGCTGTGGGGCAGAGCAGATGGAGGCACAGACCTGCTCCAGGATTTGGGGTGGTATCACGGCAACCTCACCCGCCATGCTGCCGAAGCCCTTCTGCTCTCCAATGGACGTGATGGTAGCTACCTGCTGCGGGACAGCAATGAGCAGACTGGGCTCTACTCTCTCTCTGTGAGAGCCAAAGACTCTGTCAAACACTTTCATGTTGAATATACTGGGTACTCGTTTAAATTCGGCTTTAATGAGTATTCATCTCTAAAGGATTTTGTCAAGCATTTTGCAAATCAGCCTTTGATTGGAAGCGAGACAGGGACTCTGATGGTTTTGAAGCATCCCTATCCAAGGGAAGTG…
ENSMUSG00000091685	Gm17359	-0.565801509186539	predicted gene, 17359 [Source:MGI Symbol;Acc:MGI:4936993]	ATGGCTTTGTCACACCGGGAGCCACACTGTGAGACGGTGGGAAAGCGCATGATCGTCACAGGTCCAGACTACGTAAAAGACCACTTGCCTAAAGTTCACCAGCATACCGCCTATATAGGAGAAAAGCGTCCAGCATTAGAGAAAACTGGAGATCTCAGATATTTATGGAGGCCTGCTTCAAACAGAAGCCTGCCGGCAAAATATAAACACGAGTACACCTGTGGAATTGGTTGGGGGATACCACAGTACAGTTTCTTCAACAGATCAAGAGTGGAAAGTGGCTTTCATATCCAGCATGGCGAACTAAGTCTCCGCGCGATGGACAAAATAACCCACCGCTATCAAAACCCATGTAAGCAGGAGCATGGACCATGGGGTTCCTCATGGATGCTGGTGACG…
ENSMUSG00000061175	Fnip2	-0.6951845025277527	folliculin interacting protein 2 [Source:MGI Symbol;Acc:MGI:2683054]	ATGGCCCCGACCCTGCTCCAGAAGCTCTTCAACAAAAGGGGCGGCGGCGCAGCGTCTGCCCAGGCCCGGCCGCCCAAGGAGGAGCCGGCCTTCAGTTGGTCGTGTTCGGAGTTTGGCTTGAGTGACATCCGCCTGCTAGTTTACCAGGACTGTGAGAGGAGAGGCAGACAAGTCATGTTTGACTCCAGAGCCGTTCAGAAGATGGAAGAGGCAGCAGCTCAGAAAGCAGAGGATGTTCCTATTAAAATGTCAGCCAGATGCTGTCAGGAAAGCAGCAGCAGCAGCGGCAGCAGCAGCAGCGGCAGCAGCTCTTCTCATGGCTTTGGAGGATCTTTACAACACGCTAAGCAACAGCTTCCAAAGTACCAATACACGAGACCAGCATCTGATGTCAGCATG…
ENSMUSG00000025946	Pth2r	0.17716341852879583	parathyroid hormone 2 receptor [Source:MGI Symbol;Acc:MGI:2180917]	ATGGCCTGGCTGGAGACTTTCACCTACATTTGTGGATGGCTGATTCTCAGTAGCTGTCTCCTGGTTAGAGCGCAGCTGGATTCTGACGGCACCATCACTATAGAAGAGCAGATTGTTCTTGTTATGAAGGCTAAAATGCAGTGTGAACTTAACATCACAGCCCAGCTCCAAGAAGGAGAAGGCAATTGCTTCCCAGAATGGGATGGGATCATTTGTTGGCCCAGAGGAACAGTGGGGAAAATGTCAGCTGTGCCTTGCCCTCCGTATGTTTACGACTTCAATCATAAAGGAGTTGCTTTCCGGCACTGCACCCCCAATGGGACGTGGGATTCTATTCATGGCTCAAATAAAACCTGGGCTAACTATTCAGACTGCTTTCTGCAGCCTGATATCAACATA…
ENSMUSG00000040966	Slc22a2	0.19599860149164464	solute carrier family 22 (organic cation transporter), member 2 [Source:MGI Symbol;Acc:MGI:1335072]	ATGCCGACCGTGGATGATATTCTAGAACATATAGGGGAATTCCACCTTTTCCAGAAACAAACATTTTTCCTCTTAGCTCTGCTCTCCGGTGCCTTCACCCCCATCTATGTGGGCATCGTTTTCCTGGGCTTCACCCCCAACCACCACTGCCGGAGTCCTGGAGTGGCCGAGCTGAGCCAGCGATGTGGCTGGAGCCCAGCAGAGGAGCTGAACTACACCGTGCCGGGCCTGGGGTCTGCGGGTGAGGTCTCCTTCCTCAGCCAGTGCATGAGGTATGAGGTGGACTGGAACCAGAGCACCCTTGACTGTGTGGACCCACTGTCCAGCCTGGCTGCCAACAGGAGCCACTTGCCACTGAGCCCCTGCGAGCATGGCTGGGTGTACGACACTCCCGGCTCC…
ENSMUSG00000016253	Nelfcd	0.2343374908140419	negative elongation factor complex member C/D, Th1l [Source:MGI Symbol;Acc:MGI:1926424]	ATGGCGGGTCCGGCGCCGGGTACAATTATGGGAGAAGACTACTTCGGGAATGCCTCAGAGTGGGGCGAAGAGGCAGACGGCGGCCAGCATCAGGAAGATGATTCCGGAGAAGGAGAGGACGATGCTGAGGTGCAGCAGGAATGCCTGCATAAGTTTTCCACCCGGGACTACATCATGGAGCCCTCCATCTTCAACACTCTGAAGAGGTATTTCCAGGCAGGAGGGTCTCCAGAAAACGTCATCCAGCTCTTATCTGAGAACTACACGGCAGTGGCCCAGACAGTGAACCTGCTGGCTGAGTGGCTCATTCAGACAGGCGTTGAGCCTGTGCAGGTGCAGGAGACTGTGGAAAACCACTTGAAGAGTTTGCTGATCAAGCACTTCGACCCTCGGAAAGCA…
ENSMUSG00000027380	Acoxl	0.2228524561747323	acyl-Coenzyme A oxidase-like [Source:MGI Symbol;Acc:MGI:1921371]	ATGACAGGATGGAGTGGACTGTTTATAGAAGTCCCTCTGTATAGATTGGCATCCAAAGTGTGCTGTCATCTGCGGGGACCACAGGGATTTCTTCAGAGAGCCTGCCAGGGAGTGTGTTGTCTGCCAAGGGACTCCAGAGCAGCTGGAATCATGGAAGAAAAAAGGAAGAGCTTCATCAGCCAAATCCTTATCCTGGGAGAAGTGCTCTGCATGGTGGATGTGTCCATGTCTATAAAGTGTGGAATCCTTTTTTTGTTATTTGGTGGTGCAATCAGCAATCTTGGAAGTCCTGAACATGTTACCAAGTGGTTTTGGCCACTCAAGGAGCAGAAGTATACTGGGATGTTTGCAATGACTGAGAGGGGCCATGGGAGCAACGTGAGAGGGATCCAGACTGAG…
ENSMUSG00000000708	Kat2b	0.10776972120519437	K(lysine) acetyltransferase 2B [Source:MGI Symbol;Acc:MGI:1343094]	ATGGCCGAGGCTGGCGGGGCCGGGTCCCCAGCACTGCCTCCCGCGCCCCCGCACGGTTCCCCCCGGACCCTGGCCACCGCTGCCGGGAGCTCTGCTTCCTGCGGGCCAGCGACCGCGGTGGCCGCGGCGGGCACGGCCGAGGGACCGGGAGGAGGCGGCTCGGCCCGGATCGCCGTGAAGAAGGCGCAGTTGCGCTCTGCTCCGCGGGCGAAGAAGCTGGAGAAACTCGGCGTGTACTCCGCCTGCAAGGCAGAGGAGTCCTGTAAATGCAATGGCTGGAAGAACCCTAACCCCTCTCCTACTCCACCAAGAGGAGACCTCCAGCAGATAATTGTCAGTTTGACAGAATCCTGTCGAAGCTGTAGCCATGCCCTTGCTGCTCACGTTTCTCACTTGGAG…
ENSMUSG00000036959	Bcorl1	-0.5337900254677653	BCL6 co-repressor-like 1 [Source:MGI Symbol;Acc:MGI:2443910]	ATGATCTCTACAGCACCGCTCTACAGCGGCGTGCACAACTGGACCAGTTCTGACCGGATTCGCATGTGTGGCATCAACGAGGAGAGAAGAGCACCTCTTTCTGATGAGGAGTCCACGACAGGTGGCTGCCAGCACTTTGGATCTCAGGAGTTTTGTGTCAGCAGCAGTTTTTCCAAGGTGGAGCTCACGGCAGTTGGAAGTGGCAGCAATGCCCGGGGGACAAACCCAGATGGCAATACCACAGAAAAACTTGGGCACAGGTCAGAAGATCAGTCTGATGACCCTCAGCCAAAAATGGACTATGTTGGGAATCCAGCAGAGGCTGAGGGCCTCCTGGTGCCACTGAGCAGCCCGGGAGACGGGCTCAAGCTGCCCACTCCTGACAGCACTGAGGCCAGC…
ENSMUSG00000000792	Slc5a5	0.15185627886434297	solute carrier family 5 (sodium iodide symporter), member 5 [Source:MGI Symbol;Acc:MGI:2149330]	ATGGAGGGCGCGGAGGCAGGGGCCCGGGCCACCTTCGGCCCCTGGGACTACGGCGTGTTCGCGACCATGCTGCTGGTGTCCACGGGCATCGGTCTGTGGGTCGGCCTGGCCCGCGGCGGCCAGCGCAGCGCCGACGACTTCTTCACCGGGGGCCGGCAGCTGGCGGCAGTGCCTGTGGGGCTGTCGCTGGCCGCTAGCTTCATGTCGGCTGTGCAGGTGCTCGGGGTCCCCGCGGAGGCAGCGCGCTACGGTCTCAAGTTTCTGTGGATGTGCGTGGGCCAGTTGCTCAATTCGCTGCTCACAGCCTTGCTCTTCTTGCCGATCTTCTACCGCCTGGGCCTTACCAGCACCTACCAGTACCTAGAACTGCGCTTCAGCCGAGCGGTCCGGCTCTGCGGG…
ENSMUSG00000055385	Rnf212	-0.826903658004171	ring finger protein 212 [Source:MGI Symbol;Acc:MGI:3645767]	ATGGCCAGCTGGGTGTTCTGTAATCGCTGTTTCCAGTCGCCGCACAGGAAGTCGTCCTTCAGCCTGACCAGCTGCGGGCACGTGTACTGCCACTCCTGCCTCCTCAAAGGTACAAAGAATGAATGCGTAATCTGTCAAGCTCCTTGTCAGACAGTTCTACTCTCAAAACATACAAACTCCAATATCCAGACATTCTTTCTGGGCATAGATGGTCTATGTAAGAAGTATTCCCAGGAGACCTCTCAGATTTCAGAATTTCAAGAAAAACACAGGAGGAGGTTAGTAGCTTTCTATCAAGAAAAGATTTCTCAGTTGGAGGAGTCCCTCAGAAAGTCAGTACTACAAATCAAGCAACTACAAAGTATGAGATCATCACAACAACCAGCTTTCAACAAAATC…
ENSMUSG00000037922	Bank1	-0.2841842793221111	B cell scaffold protein with ankyrin repeats 1 [Source:MGI Symbol;Acc:MGI:2442120]	ATGCTTCCTGTGGCTTCTGGCACTAGGGGTAGCACCCAGGATCTGTTCCAGGTTGGCCTAGCACCTCCAGGAAATGCAAAAGATATCCTGTTGCTATATGAAGAAGATGCTGAGGAATGGGCTCTATACTTGAGAGAAATATTTATGCGTGTTGTAGAAAGAGAAGCAATCCTGTTATATCCCTTGCACAGTTTTTCTTCTTCACATTTGGAAATGCTAAACTTCTATGCTTACAAATGTAAACTTCTGATAATATCCAATAGTCTACTTAAAGACCTGACGCCAAAGAAGTGTCAGTTTCTGGAGAAGATACTTCACTCAACAGGAAATGTAGTGACTTTGCTTTGTGGGATGGAGAGCTCAGATCCTTTCTATCAGTTATTAAGTATCCCCAGAAAG…
ENSMUSG00000030769	Slc5a11	0.44729724627383727	solute carrier family 5 (sodium/glucose cotransporter), member 11 [Source:MGI Symbol;Acc:MGI:1919316]	ATGGAGAGTGCCACCATCAGCCCTCAGCCCCCACAGTCTGACTCCCTGGAGGCCTTTCCCCAGAAGAGCATGGAGCCTGCAGACATCGCTGTCCTAGTTCTGTACTTCCTCTTTGTTCTGGCTGTTGGATTATGGTCCACAGTGAGGACCAAACGAGACACAGTGAAAGGCTACTTCCTGGCTGGAGGGGACATGGTGTGGTGGCCAGTGGGTGCATCCTTGTTCGCCAGCAATGTTGGAAGTGGACACTTCATTGGCCTCGCTGGGTCTGGTGCTGCTGTGGGCATTTCTGTCGCTGCCTATGAGCTTAATGGCTTGTTTTCTGTGCTGATGCTGGCCTGGGTCTTCCTTCCTATCTACATTGCTGGCCAGGTAACCACGATGCCAGAATATCTAAGG…
ENSMUSG00000031927	1700012B09Rik	0.05524458822221759	RIKEN cDNA 1700012B09 gene [Source:MGI Symbol;Acc:MGI:1916575]	ATGAGGCGGCAGGAGGCGCTGGCAGGGACAGCCTCAGAGGCGGGCCGCGAAGGGGAGCAGCCTAGGCCGGCAGGGCTGGGGTGCCGCACCCGTGCTGAGCCTGGTGGCCCCCAAGAGTCTCGCCAACAATGGAAAACATTTCTATACTGTGAACCGCATAAGAGAATCAAGGAGGTTTTGGAAGAAGAACTTTCAATCAAGAGAGATGAATGCCATGTGAAAAGCCCACCTACAGTGGCCCTGGATGGAATCTGGAGCATTAGAAGGAATCTCCCTGTGGGAGGCACCATATCAGGACAGCAGAGCAGAAACAGCTCACTTCCACAAGCCAAGTACTACTCGAGGATAAGATGGACACATCTTTCCACAGAGATGGAACTTCATTCACCTAAAGTCTAA
ENSMUSG00000042182	Bend6	-0.06302287376432333	BEN domain containing 6 [Source:MGI Symbol;Acc:MGI:2444572]	ATGCAGAAGATCTTGCAGACAGATGACATCACCGACAACCAAGTTCTTAGAAAAAGAAAGAGGAAACGGACAGAGACAGCAAACTCAGAAAATGCGAATAGTGCTCTGGAGAAAGCACAGAGAGACCCATATTCAGGAAATGCTTTCCTGCCTGGGGAGAGTTCCAGCGATGAGGAAACTCCCTTAATGGAACTGTCCAAGGAGGAACTTTGTAACAAAATCGAAAGCCTGAAAGAAAAACTAAGAAGCATCCGGAAGGAAAACAGCCGGCTTCGACAGTCTTTGGTCATGCTGCAAGTGTTACCTCAGGCAGTCACACAGTTTGAAGAACTGGTTGGAATGGCAGAGACCCTCCTTAAGAGTGGAGGAGCCGTGTCCACACCAGCGTCTACTCTCTGG…
ENSMUSG00000114755	Galr3	-0.3539435220509918	galanin receptor 3 [Source:MGI Symbol;Acc:MGI:1329003]	ATGGCTGACATCCAGAACATTTCGCTGGACAGCCCAGGGAGCGTAGGGGCTGTGGCAGTGCCGGTGGTCTTTGCCCTCATCTTCCTGTTGGGCATGGTGGGTAATGGGCTGGTGTTGGCCGTGCTTCTGCAGCCTGGCCCAAGTGCCTGGCAGGAACCGGGCAGTACCACGGATCTCTTCATCCTCAACTTGGCGGTGGCCGACCTTTGCTTCATCCTGTGCTGCGTGCCCTTCCAGGCGGCCATCTACACACTGGATGCCTGGCTCTTTGGGGCTTTCGTGTGCAAGACGGTACATCTGCTCATCTACCTCACCATGTATGCCAGCAGCTTCACCCTGGCGGCCGTCTCAGTGGATAGGTACCTGGCGGTGCGACACCCGCTGCGCTCCCGGGCCCTC…
ENSMUSG00000016552	Foxred2	-0.2209970907728934	FAD-dependent oxidoreductase domain containing 2 [Source:MGI Symbol;Acc:MGI:106315]	ATGGGTCCCTCGGGGCTGCTGGTGGCCCTAGCCTTGCACCTGGCAGTGTGTTCCCGTCCGCACCGGGACTACTGCGTCCTGGGCGCCGGTCCTGCGGGCCTGCAGATGGCCGCCTTCCTGCATCGAGCCGGCAGGGACTACGAGGTATTCGAACGCGAGTCCGCACCTGGCAGCTTCTTCACTCGCTACCCGCGCCACCGCAAGCTCATCAGCATCAACAAGCGGCACACGGGCAAGGCCAACGCCGAGTTCAACCTCCGCCACGACTGGAACTCGCTGCTCAGCGACGACCCACACCTGCTCTTCAGACACTACTCGCAGGCTTACTTCCCCGACGCCAGCGACATGGTGCGCTACCTGGGTGACTTCGCGCGGCGCCTGGGGCTCCATGTGTTATAC…
ENSMUSG00000006378	Gcat	0.7796917655936954	glycine C-acetyltransferase (2-amino-3-ketobutyrate-coenzyme A ligase) [Source:MGI Symbol;Acc:MGI:1349389]	ATGTGGGCCAGCTTCATGTGGCACGGGGCGCTGTCCCCTGGCCGCCGCGCACATTCAGCGCTGGCTCAGTTGCGCTGCATCCTGGACAGCGAACTGGAAGGGATCCGCGGAGCCGGCACCTGGAAGAGTGAGCGTGTGATCACGTCCCGCCAGGGACCGAGCATCCGCGTGGACGGCATCTCGGGAGGAATCCTCAACTTCTGTGCCAATAACTACCTGGGCCTGAGCAGCCACCCTGCAGTGATCCAGGCAGGTCTGCAGACTCTGGAGGAGTTTGGAGCTGGACTCAGTTCTACTCGATTTATCTGTGGGACCCAGAGCATCCATAAGAATCTAGAAGCCAAGATAGCCCACTTCCACCAGCGTGAGGACGCCATCCTCTATCCCAGCTGTTTCGAT…
ENSMUSG00000048562	Sp8	-1.4485701543494163	trans-acting transcription factor 8 [Source:MGI Symbol;Acc:MGI:2443471]	ATGCTTGCTGCTACCTGTAATAAGATCGGCAGCCCCAGCCCGTCTCCCTCCTCCCTGTCGGACAGCTCTTCTTCCTTCGGTAAAGGCTTCCACCCTTGGAAACGCTCCTCGTCTTCCTCCTCCGGCAGCTGCAACGTAGTGGGTTCCAGTCTCTCTAGCTTCGGTGTGTCGGGGGCCTCCCGGAACGGCGGCTCCTCCTCAGCCGCAGCGGCGGCAGCGGCGGCAGCAGCGGCGGCCGCAGCCCTGGTGTCCGACTCTTTTAGCTGCGGAGGCTCGCCCGGCTCCAGCGCCTTCTCTCTCACCTCCAGCAGCGCCGCCGCAGCGGCAGCAGCTGCGGCGGCTGCCGCTTCCAGCTCGCCCTTTGCCAACGACTACTCTGTGTTCCAGGCTCCGGGCGTC…
ENSMUSG00000020848	Doc2b	0.33988322565419904	double C2, beta [Source:MGI Symbol;Acc:MGI:1100497]	ATGACCCTCCGGCGGCGCGGGGAGAAGGCGACCATCAGCATCCAGGAGCATATGGCCATCGACGTGTGTCCCGGCCCCATTCGGCCTATCAAGCAGATCTCCGATTATTTTCCCCGCTTCCCGCGGGGCCTCCCCCCTACCGCCGCGCCCCGCGCCCCCGCGCCCCCGGACGCCCCCGCGCGCTCTCCCGCAGCCAGCGCCAGCCCCCGCAGCCCCTCCGACGGCGCCCGCGACGACGACGAAGATGTGGACCAGCTCTTCGGAGCCTACGGAGCCAGCCCAGGCCCCAGCCCCGGCCCCAGCCCCGCGAGGCCGCCCGCCAAGCCCCCCGAGGACGAGCCGGACGTCGACGGCTACGAGTCAGACGACTGCACCGCCCTGGGTACGCTGGACTTCAGT…
ENSMUSG00000024646	Cyb5a	0.9232603009679814	cytochrome b5 type A (microsomal) [Source:MGI Symbol;Acc:MGI:1926952]	ATGGCCGGGCAGTCAGACAAGGATGTGAAGTACTACACCCTGGAAGAGATTCAGAAGCACAAAGACAGCAAGAGCACCTGGGTGATCCTGCATCATAAGGTGTACGATCTGACCAAGTTTCTCGAAGAGCATCCTGGTGGAGAAGAAGTCCTAAGAGAGCAAGCTGGGGGTGATGCTACCGAGAATTTTGAGGACGTCGGGCACTCTACGGATGCACGAGAACTGTCCAAAACATACATCATCGGGGAACTCCATCCAGATGACAGATCAAAGATAGCCAAGCCTTCGGATACTCTTATCACTACTGTGGAGTCTAATTCCAGTTGGTGGACCAACTGGGTGATCCCAGCCATCTCAGCCCTGGCTGTAGCTCTGATGTATCGCCTCTACATGGCAGAA…
ENSMUSG00000025538	Sumf2	0.12889565516482496	sulfatase modifying factor 2 [Source:MGI Symbol;Acc:MGI:1915152]	ATGCGCTCTGAGTTCTGGTTCCCCAGCATGGGTTCCTTGCTCCCTCCGGTGTTGCTGCTGTGGCTCCTGTCCTGCCCCAGGCTTCAGCTAGGACATGCCCAGGATCCTGCCATGGTGCATCTGCCAGGTGGCCGGTTTCTGATGGGGACAGACGCTCCAGATGGCAGAGACGGTGAAGGGCCTGCCCGGGAAGTGACAGTAAAACCCTTTGCCATCGACATATTTCCAGTCACCAATAAAGACTTCAGGGAGTTTGTCAGGGAGAAGAAGTACCAGACTGAAGCCGAGGCATTCGGGTGGAGCTTCGTCTTTGAGGATTTTGTCTCCCCTGAGCTCAGAAAGCAAGAAAATCTGATGCCGGCTGTTCACTGGTGGCAGCCAGTGCCAAAGGCATTTTGG…
ENSMUSG00000078439	Smim24	0.5069012887900172	small integral membrane protein 24 [Source:MGI Symbol;Acc:MGI:1919523]	ATGGACACCTTGGGCAGGCTGCTGCTGCTGGCTACACTGTTCCTGACACCCGCTGAGGCCCAGCAGGCCTCAGAGCGCCGCCTGAAGCCTTGGCTAGTAGGCCTGGCTGCAGTAGTGGGCTTCCTGTTTATAGTCTTCATCCTCATGCTGGCCAATCGTGTCTGGTGCGCCAAAGGCAGAGCAGAGGATGAGGAGGCTACATTCAGAATGGAGCACATTATGAACGAGAACTCACAGCCAAGTAAAGCAGACAAGAAGCAGAAGAAGAAGGTGGACAGGAAGGGCGGACAGAGCAACGAGGCCTTGGAACTAGAGGAAAAGGAGTCCTCAGATGAGGAGAGAGGCAAGAAAACAGCTTTGTAA
ENSMUSG00000071719	Tmem28	-0.6239241229568039	transmembrane protein 28 [Source:MGI Symbol;Acc:MGI:3648377]	ATGTTCAGGGGCGCTTGGATGTGGCCCGGGAAAGACGCCGCCGCGCTGACTATCTGCTGCTGCTGCTGCTGCTGGGCTCCCAGGCAGAGCGACAAACCTTGCGCCGATTCGGAGCGGGCGCAGCGATGGCGACTGTCCCTGGCGTCCCTGCTCTTCTTCACCGTGCTGCTCGCTGACCATCTGTGGCTGTGCGCGGGGGCCCGGCCCCGGGCCAGGGAGCTGAGCAGCGCCATGCGGCCGCCCTGGGGGGCCGGCCGCGAGCGGCAGCCGGTACCTCCTCGCGCGGTGCTGCCGCCGCCGCCGCCGTCGCCTGGCGAGCCCAGCGCGTCCTCGGGCACCTGCGGCCCGCGATACAGCAACCTGACCAAAGCCGCCCCTGCAGCCGGCTCCGGGCCGGTC…
ENSMUSG00000095187	Olfr1381	-0.036854513587022714	olfactory receptor 1381 [Source:MGI Symbol;Acc:MGI:3031215]	ATGGAATATTTGAACACCAGTTCAGAAGAGGGCTTCATTTTAGTGGGCTTCTCAGACTGGCCTCACCTAGAACCAACCCTTTTTGCTTTCATTTCTATTTTCTACTCTCTGACTCTCTTTGGCAACACCGTGATCATCATTCTGTCTCGACTGGACCTCCGCCTGCACACACCCATGTACTACTTCCTCTGCCACCTCTCCTTCCTGGACCTCTGCTACACCACCAGCACTGTGCCCCAGCTTCTGGTCAACCTCTCTGGACTTGACAGGACCATCAGCTTTGGAAGGTGTGTGGCCCAGCTCTGCATAGTGCTCTCACTGGGAGGAACTGAGTGTGTGCTTTTGGTGACAATGGCTATAGATCGCTATGCTGCTGTGTGTCGCCCACTCCACTACACA…
ENSMUSG00000020687	Cdc27	-0.5247491555197826	cell division cycle 27 [Source:MGI Symbol;Acc:MGI:102685]	ATGACGGTGCTGCAGGAACCTGTCCAGGCTGCTATATGGCAAGCGCTAAACCACTATGCTTACCGAGATGCAGTTTTCCTCGCAGAACGACTATATGCAGAAGTACATTCAGAAGAAGCCTTGTTTTTACTGGCAACCTGTTACTACCGCTCAGGAAAGGCTTATAAAGCATATAGACTCTTGAAAGGACACAGTTGTACCACCCCACAGTGTAAATACCTGCTTGCAAAATGTTGTGTTGACCTCAGCAAGCTTGCAGAAGGGGAACAGATCTTATCTGGTGGAGTGTTTAATAAGCAGAAAAGCCATGACGACCTTGTCACTGAGTTTGGAGATTCAGCTTGCTTCACTCTTTCCTTGTTGGGACATGTGTATTGCAAGACAGATCGGCTTGCCAAA…
ENSMUSG00000021975	Ints9	0.07085405608134723	integrator complex subunit 9 [Source:MGI Symbol;Acc:MGI:1098533]	ATGCTCTGGGCTATAGAGATTAAACCGGAAGATCCTTCCCTGTCTTTAGAAGTGAAGAGACTGGTACTGAACAACCAAAAGTCCGATATGAAACTGTATTGCCTGTCAGGGCACCCAACTTTACCATGCAACGTACTCAAATTCAAATCCACTACTATTATGTTGGACTGTGGACTGGACATGACTTCCACCCTCAATTTCCTCCCTTTGCCTCTTGTTCAAAGCCCCAGGCTATCTAATCTTCCCGGATGGTCTCTAAAAGACGGAAATGCTTTTTTGGACAAGGAGCTAAAAGAGTGCTCCGGTCATGTATTTGTGGATTCTGTGCCTGAATTCTGCTTACCAGAGACCGAGCTAATAGACCTGTCTACAGTCGATGTGATCCTCATCTCTAACTAC…
ENSMUSG00000118591	AC147806.1	-0.0646907446884187	novel protein	ATGAACTCGTCTTCTGAGCATTGCAATGTATCTGACTGGCTGAGACTAGAGGCAACCGTGAAGGCCTCTGTGTACGTGGTGGCTTTCTCAATCACCACATCTCTCACCATTGTCATTATCGCAATAGTGTCACAGAGTCTGCAGCTGAGGAAAGAGGTGCGGCTGGTCCTCCTCTGCCATCACCTGCTTTGTATCTCCTCCTACTGTGGCCTGGGGGTCGTCTTCCAAGGAATGGGGGCCTTACTGGCCAACAGCCCCCTCCTGCTGTGTTGGCTGGTATTTGGGGCGCAGCTAAGTGTGGGAGAAGGGATCCTCCTTACTCTGACCTTGATGGCTCTCAATACTTACCTCGCTATTTGTTATCCATTGAACTCTCCATCCTTTGTGGATTCTGCTAAG…
ENSMUSG00000107645	Olfr1380	0.005628377237684303	olfactory receptor 1380 [Source:MGI Symbol;Acc:MGI:3031214]	ATGGAATATTTGAACACCAGTTCAGAAGAGGGCTTCATTTTAGTGGGCTTCTCAGACTGGCCTCACGTAGTACCCATCCTTTTTGCTTTCATTTCTATTTTCTACTCTCTGACTCTCTTTGGCAACACCGTGATCATCATCCTGTCTCAACTGGACCTCCGCCTGCACACACCCATGTACTACTTTCTCTGCCACCTCTCCTTCCTGGACCTCTGCTATACCGCCAGCACTGTGCCCCAGCTTCTGGTCAACCTCTCTGGACTTGACAGGACCATCAGCTTTGGAAGGTGTGTGGCCCAGCTCTGCATAGTGCTCTCACTGGGAGGAACTGAGTGTGTGCTTTTGGTGACAATGGCTATAGATCGCTATGCTGCTGTGTGTCACCCACTCCACTACACA…
ENSMUSG00000023829	Slc22a1	0.013586799324785927	solute carrier family 22 (organic cation transporter), member 1 [Source:MGI Symbol;Acc:MGI:108111]	ATGCCCACCGTGGACGATGTCCTGGAGCACGTTGGAGAGTTTGGCTGGTTCCAGAAGCAAGCCTTCCTGTTGCTATGCCTGATCTCAGCTTCTTTAGCTCCCATCTACGTGGGCATCGTTTTCCTGGGCTTCACCCCCGACCACCACTGCCGGAGTCCTGGAGTGGCCGAGCTGAGCCAGCGGTGTGGCTGGAGCCCGGCAGAGGAGCTGAACTACACCGTGCCGGGCCTGGGGTCTGCGGGTGAGGCCTCCTTCCTCAGCCAATGCATGAAGTATGAGGTGGACTGGAACCAGAGCACCCTTGACTGTGTGGACCCACTGTCCAGCCTGGCTGCCAACAGGAGCCACTTGCCACTGAGCCCCTGCGAGCATGGCTGGGTGTACGACACTCCCGGCTCC…
ENSMUSG00000073758	Sh3d21	-0.20121001111543232	SH3 domain containing 21 [Source:MGI Symbol;Acc:MGI:1914188]	ATGGAGGTCCTGGTCCTGGCCAGATACCGAGCGCAGACGGAGGACGAGCTGAGTCTGGCTCCGGGGGACGTGATCCGGCAGGTGTGCGCGGGGCCCGCTCGGGGCTGGCTGCTTGGGGAGTTGCGGGGCCGCCGCGGTCGCTTCCCCAAGCGCCTGGTGCAGGAGATTCCGGAGGCCCTGCGGGGCGTCACCGAGTCCAGACCGCGCTTTCCGCGCCGTAGTCGCCGTCACCCCATCAACTCTCGGGACCCCCAAAGATGGTGCAGAGTGAACTTCAACTACAGCCCAGAGCAGGCAGACGAGCTGACGCTTCAAACTGGGGAGATTTTGGAAGTGATAAAGGAGATTGAGGACGGCTGGTGGCTGGGAGAGAAGAACGGGCAGTTGGGAGCCTTCCCA…
ENSMUSG00000038709	Txndc8	0.28679520574443296	thioredoxin domain containing 8 [Source:MGI Symbol;Acc:MGI:1914652]	ATGATGAATGGGACAGCTACGGTGATCCTCCACCTGAACCAACAGGAGAGGGTCAGCAGCAAGTCCCAGATGTTAATCATGGTGAAGAGGATTAAGAACATGAGTGAACTGAAAGAATTGTTCAGCGATGCTGGAAACAAGCTTGTGGTGGTAGAGTTTTCAGCAAAGTGGTGTGGCCCCTGCAAAACAATTGCTCCTGTTTTCCAGGCAATGTCTTTAAAATACCAAAATGTCACGTTTGCTCAGGTGGATGTGGACTCATCTAAGGAATTAGCTGAACATTGTGACATCACAATGCTACCCACATTCCAGATGTTCAAGTACACCCAAAAGGTCACTCCATTCTCAAGACTCAAAAGAGTACTGTGCTGCCTCAGAAGTGGACCGAAGAGCAAGATG…
ENSMUSG00000060988	Galnt13	-0.034421671740591714	polypeptide N-acetylgalactosaminyltransferase 13 [Source:MGI Symbol;Acc:MGI:2139447]	ATGAGGAGATTTGTCTACTGCAAGGTGGTTCTGGCCACTTCTCTGATGTGGGTGCTTGTTGATGTCTTCTTACTCCTGTACTTCAGCGAGTGTAACAAGTGTGATGACAAGAAGGAGAGATCCCTGCTGCCTGCGCTGAGGGCTGTTATTTCAAGAAACCAAGAAGGTCCAGGAGAAATGGGAAAGGCTGTGCTTATTCCAAAAGATGACCAAGAGAAAATGAAAGAGTTGTTTAAAATCAATCAGTTTAACCTCATGGCCAGTGACTTGATCGCACTTAACCGAAGTCTGCCGGATGTGAGATTAGAAGGATGCAAGACTAAAGTCTACCCTGATGAACTTCCAAACACAAGTGTAGTCATTGTGTTCCATAATGAAGCTTGGAGCACTCTACTTAGA…
ENSMUSG00000031166	Wdr13	-0.3884731453654794	WD repeat domain 13 [Source:MGI Symbol;Acc:MGI:1914661]	ATGGCCGCGGTGTGGCAGCAAGTATTAGCAGTGGACGCGAGGTACAACGCCTACCGTACACCAACGTTTCCACAGTTTCGGACCCAGTATATCCGCCGGCGCAGCCAGCTGCTTCGGGAGAATGCCAAAGCTGGTCACCCCCCAGCATTGCGTCGGCAGTACCTGAGGCTACGGGGCCAGCTATTGGGCCAACGGTACGGGCCACTCTCAGAACCAGGCAGTGCTCGTGCCTATAGCAACAGCATTGTCCGCAGCAGCCGAACAACCCTTGATCGAATGGAGGACTTTGAAGATGACCCCAGAGCCCTGGGGGCTCGAGGACACCGCCGATCTGTCAGCCGAGGTTCCTACCAGCTGCAGGCACAAATGAACCGTGCAGTCTATGAGGACAGGCCTCCT…
ENSMUSG00000020673	Tpo	-0.012771289745922763	thyroid peroxidase [Source:MGI Symbol;Acc:MGI:98813]	ATGAGAACACTTGGAGCTATGGCAATAATGCTGGTGGTTATGGGAACTGTAATTTTCCTCTCTTTTATCCTGAGAAGCAGAGACATCTTGTGTGGGAAGACCATGAAGTCCCATGTTATCAGTGCTGTGGAAACGAGCCAGCTCATGGTGGACCATGCAGTCTACAACACCATGAAAAGAAACCTCAAGAAAAGGGAAGTCCTTTCTCCAGCCCAGCTTCTCTCTTTCTTTAAGCTGCCCGAGTCCACCAGTGGGGCTATTTCCCGAGCAGCAGAGATTATGGAAACATCAATACAAGTCATGAAACGTGAACAGTCACAGTTCTCCACGGATGCCTTATCAGCAGACATTCTGGGCACAATTGCCAACCTGTCAGGATGCTTGCCTTTCATGCTGCCA…
ENSMUSG00000116378	Gcat	0.7782787755186577	glycine C-acetyltransferase (2-amino-3-ketobutyrate-coenzyme A ligase) [Source:MGI Symbol;Acc:MGI:1349389]	ATGTGGGCCAGCTTCATGTGGCACGGGGCGCTGTCCCCTGGCCGCCGCGCACATTCAGCGCTGGCTCAGTTGCGCTGCATCCTGGACAGCGAACTGGAAGGGATCCGCGGAGCCGGCACCTGGAAGAGTGAGCGTGTGATCACGTCCCGCCAGGGACCGAGCATCCGCGTGGACGGCATCTCGGGAGGAATCCTCAACTTCTGTGCCAATAACTACCTGGGCCTGAGCAGCCACCCTGCAGTGATCCAGGCAGGTCTGCAGACTCTGGAGGAGTTTGGAGCTGGACTCAGTTCTACTCGATTTATCTGTGGGACCCAGAGCATCCATAAGAATCTAGAAGCCAAGATAGCCCACTTCCACCAGCGTGAGGACGCCATCCTCTATCCCAGCTGTTTCGAT…
ENSMUSG00000031700	Gpt2	0.09925154780365011	glutamic pyruvate transaminase (alanine aminotransferase) 2 [Source:MGI Symbol;Acc:MGI:1915391]	ATGCAGCGGGCAGCGGTGCTGGTGCGGCGGGGCTCCTGCCCCCGCGCCTCGGGCCCCTGGGGCCGTAGTCACAGCAGCGCTGCAGCCGAAGCCTCGGCGGCGCTCAAGGTGCGACCGGAGCGCAGCCCTCGAGACCGCATCCTCACCCTGGAGTCCATGAACCCGCAGGTGAAGGCGGTGGAGTACGCTGTGCGGGGACCCATCGTGCTCAAAGCCGGCGAGATCGAGATGGAGCTGCAGCGGGGTATCAAAAAACCATTCACTGAGGTAATCCGAGCCAACATTGGGGATGCCCATGCTATGGGCCAGCAGCCAATCACCTTCCTCCGTCAGGTGATGGCACTCTGCACCTACCCAAACCTACTAAACAGCCCCAGCTTCCCAGAAGACGCTAAGAAA…
ENSMUSG00000060260	Pwwp2b	-0.3719953655129612	PWWP domain containing 2B [Source:MGI Symbol;Acc:MGI:2142008]	ATGGAGCCGCGGGCCGGCTGCCGGTTGCCGGTGCGGGTGGAACAGGTCGTCAACGGCGCGCTGGTGGTCACCGTGAGCTGTGGCGAGCGCAGCTTCGCCGGAATCCTGCTGGATTGCACGAAAAAGTCTGGCCTCTTTGGCCTGTCTCCATCTACTCTACTGCCTCTGGCTGACAACTCCTCTGCCGTCAGCTGTCATGGCCAGGCTCCCGAGGAGGGAACTGGAGAAGTGATGCAGCTAGAGACAGGACCTCTGCATCCTCACCACAAAGACCCTGAGAAGGATCAGCCTCCCAAGACAGCTGTGTCTGAGCCGCCCCCACCTCTCATACCACCTGTGCCTGCCGGGAACCTGCCTCCCTTTCCACCATACTTTGAGGGTGCCCCCTTCCCTCACCCA…
ENSMUSG00000032741	Tpcn1	-0.04582591589420168	two pore channel 1 [Source:MGI Symbol;Acc:MGI:2182472]	ATGGCTGTAAGTTTAGATGACGATGTGCCGCTCATCCTGACCTTGGACGAGGCTGAGAGTGCTCCGCTGCCTCCTTCGAACAGCCTGGGCCAAGAGCAGCTGCCCAGCAAAAATGGGGGCAGCCACAGCATCCACAACTCCCAGGTCCCCAGTCTGGTCTCCGGAGCGGACAGCCCCCCCTCCAGTCCCACCGGACACAACTGGGAGATGAATTATCAAGAGGCGGCAATCTACCTCCAGGAAGGTCAGAACAACGACAAGTTCTTCACCCACCCCAAGGATGCCAGAGCGCTGGCGGCCTACCTCTTCGTCCACAACCACTTCTTCTACATGATGGAGCTGCTCACGGCCCTGCTCCTGCTGCTGCTGTCGCTGTGCGAGTCCCCCGCTGTCCCCGTG…
ENSMUSG00000045744	Bricd5	-0.3277638211977033	BRICHOS domain containing 5 [Source:MGI Symbol;Acc:MGI:2441766]	ATGAAGCAAGGGCGCATCCACACTGAGAGCCTCAGGTCCAAGCCTGCTGAGGTGAAGACCAAACCCTGCCATAGGGGCTGGAGAGCAGCAGGCCTGCTGCTGCTGCTGACACTGCTCACTGCGGGGGCCGTGGCTGGGGGGCTTCTTGGCTTCATGTACAGCTCTCCCAAGCCGTTGCTGCAGATGCTCCGAAAGACCTTCCCGAGCTCCAGGGTACCCTGGCCCAACCAAACTACTCTAGTGGATGTGGCCCAGAACATGGCAACCATCGTGGTGACTCCGTTTCAGAGCAACCACAGCTGGGCTGTGCTGTTTGACGGGCAGAACGGCTACATCTGTTACCGCCCTGCAGAGCACCAAGCCTGCTTCCTCCGTCTGATGGAAGCCCAAGATTGGGAG…
ENSMUSG00000016256	Ctsz	0.12795893104414305	cathepsin Z [Source:MGI Symbol;Acc:MGI:1891190]	ATGGCGTCGTCGGGGTCGGTGCAGCAGCTGCCCCTGGTGCTGCTGATGTTGCTGTTGGCGAGTGCGGCACGGGCCAGACTCTACTTCCGCTCGGGCCAGACTTGCTACCATCCCATTCGCGGGGACCAGCTGGCTCTGCTGGGGCGCAGGACTTATCCTCGGCCGCATGAGTACCTGTCCCCAGCGGATCTCCCCAAGAATTGGGACTGGAGAAATGTGAACGGTGTCAACTATGCCAGCGTCACCAGGAACCAGCACATCCCACAGTACTGTGGTTCCTGCTGGGCCCACGGCAGCACCAGTGCCATGGCAGACCGAATCAACATCAAGAGGAAAGGTGCATGGCCCTCCATCCTGCTGTCCGTACAGAATGTCATTGACTGTGGCAATGCTGGCTCT…
ENSMUSG00000079583	Gm7073	-0.5740905459584663	predicted gene 7073 [Source:MGI Symbol;Acc:MGI:3779666]	ATGATCATAGCCTTCACCTTTACCTGTTTCTGTCTACTCCATTACAATTGTATGGTTGAGGAGGTCCAGCCACCAGGAGGGCTCAACAAAGAAAATATGGAAGCTATTTCATCCTGGGTATCCAAAGTATCAGAGTATCAACCTGATATGATAGTTGAGGACATTCTAGAAACTCAACCTCTGCTATTAAACGTAGACCAAACATCAGCGCCCTTATGTCCAGATAAACAGCCCATACCAAACAATACAGCAAAATCAATTCAGGCTTCAAGTCTAGAAAAGCCATGCATACCATCACCTAATGCACAAAAATCAACAAAATGCATAAATATAGAAAAGTCATCTACATCATGCAGTGCAAAATATTCAAATAGGCCATTAAAGTCAAATAGGCCAACT…
ENSMUSG00000021977	1700129C05Rik	-0.0029672124206117957	RIKEN cDNA 1700129C05 gene [Source:MGI Symbol;Acc:MGI:1915182]	ATGATGAGAAGGAAGCGGCCAAGGATTTTGGGAAGTCTACGCAATCCTGTTCCCCCTAAGGATCTTTCTCTGCCCTCTGATCAACCAAAAAACATTCATTTCTTCCCACCTCAGACTCCCATGCCTCAGCCTACCTTTCGTACCAACCCTCTTTTCGTTTTCTACCCTACCTCCTTCCCTGCCCTGAGGAACACTTCCTACTTCCCCACCTTAATGATTGCTATGCCCAGCTCCTCCTGTGTAAACAAACTTTCCTCTAAGCACCCCTCTTATTTCCAGACCCCTTCCTTCCTGTCTACCCTCATGTCTACCTCTTCTCCAAGAGCACTGCTGGATAGTTGCCTAGTTCCTCTTTCCCATCTGGAAACTAGCTACTTTCAGCCAGAGGAGCAAATCCTT…
ENSMUSG00000024091	Vapa	0.05580372217530041	vesicle-associated membrane protein, associated protein A [Source:MGI Symbol;Acc:MGI:1353561]	ATGGCGTCCGCCTCCGGGGCCATGGCGAAGCACGAGCAGATCCTGGTCCTCGACCCTCCTTCAGACCTCAAATTCAAAGGCCCCTTCACAGATGTAGTCACTACAAATCTTAAATTGCAAAATCCATCGGATAGAAAAGTGTGTTTCAAAGTGAAGACTACAGCACCTCGCCGGTACTGTGTGCGGCCCAACAGTGGGATTATTGACCCGGGGTCAATTGTGACTGTTTCAGTAATGCTGCAACCCTTTGATTATGATCCGAATGAAAAGAGTAAACATAAGTTCATGGTACAGACAATTTTTGCTCCACCAAACATTTCAGATATGGAAGCTGTGTGGAAAGAAGCAAAACCTGATGAATTAATGGATTCTAAATTGAGATGTGTGTTTGAAATGCCG…
ENSMUSG00000039110	Mycbpap	-0.14048477116535193	MYCBP associated protein [Source:MGI Symbol;Acc:MGI:2388726]	ATGAAGGCCATCAAGAAGGAATCCCGTCTCAAAATGCCAACCAGCAAGATCCTGGAGAACGCAGAGAGCGTCAAAGAAAAGAAGCGGGCGAAGGCACCTGAACAGCCCACTCCCCCCATTCAGGAAGAGCCTGAGCCTGTCAGCAATGTCTTACAAGGAGATGACATTCTTGCCTTGGCCATTAAAAAGGAAGACTTGAGGAAGCAACATGTTCCTCAGTTTGAAGAAACAGGAGAAAAGCCTGTGGTCACACAGAAATTTATCATCCGTAAGCTCAAACCGAAAGACTCTAGCAAAAGGGTCTACCACTTGGTAGCACATCCTGCTACTCCAGATGCCGCCACCAAGCCTCTGGACTACTCCGGTCCTCATGACAGCTTCTTAAGCAGTGGCCAGATC…
ENSMUSG00000027611	Procr	-0.08643376079166218	protein C receptor, endothelial [Source:MGI Symbol;Acc:MGI:104596]	ATGTTGACGAAGTTTCTGCCGCTACTGCTGCTGCTGCTGCCTGGCTGCGCCCTTTGTAACTCCGATGGCTCCCAAAGCCTGCATATGCTCCAGATCTCCTATTTCCAAGACAACCATCATGTGAGGCATCAGGGCAACGCCTCTCTGGGAAAACTCCTGACACACACGCTGGAAGGCCCCAGCCAAAACGTCACCATCCTCCAGCTACAGCCCTGGCAGGATCCGGAGAGCTGGGAGCGCACAGAGAGTGGCCTGCAGATCTATCTGACCCAGTTCGAAAGCCTGGTGAAGCTGGTATATCGCGAGCGCAAGGAGAACGTGTTCTTTCCTCTCACTGTTAGCTGCTCCCTGGGCTGCGAGCTGCCGGAGGAGGAGGAGGAGGGCTCTGAACCCCATGTC…
ENSMUSG00000078213	Btbd35f4	-0.3586304923139768	BTB domain containing 35, family member 4 [Source:MGI Symbol;Acc:MGI:3781925]	ATGGGGCTTTTAGTCAGCAGGGTCTTGAGATGCAGGGATTCCAGTCTGTTAGAGCCACAGCCAGAAGCCATAGCCGGAGCCAGCTACATTCCTGGCAGTCGCAAGCGAAAAAGAAACAGTTTGGAGGAGTTGGCAACAAGTTCTAATGTTCATGGACCTCAAAACCAGCGAATGTATCCACATCAAGTTCTCAACTACATCTACTGGAAAAGGGTTAAGATCTCATCTAATGATGCTTATCAAAACTTATTTTTGGACGGGCATGATAGCGACATTAAAATCCGTGCTCTGGGAAAAACATGGTGTTTACACAAAGTATTTTTATGTCAGTCAGGCTACTTTGCTAACATTCTCAAAGGTACTTGGAGAGAATCACACCATGGTGTTATAAATCTGATC…
ENSMUSG00000026623	Lpgat1	0.4159090235551425	lysophosphatidylglycerol acyltransferase 1 [Source:MGI Symbol;Acc:MGI:2446186]	ATGACCGCGACCCCCGGGCCAGGGACTCCCGCCGCCGCCGCCGCCGCCGGCCCTCGGCCCTGTCGCCGCTCGCCGCTCGCGCCCACTGAGAAAGACAGGACCGACGCCAATGTAAGAATGGCCGTGACCGTGGAAGAAGCTCCGTGGCTGGGCTGGATTGTAGCGAAAGCCCTGATGAGATTTGCCTTCATGGTCGCCAACAACCTGGTCGCTATTCCATCCTACATCTGCTATGTAATTATACTGCAGCCACTCCGAGTGCTGGACAGTAAGCGCTTCTGGTATATCGAAGGACTCATGTACAAATGGCTTTTAGGAATGGTGGCTTCCTGGGGCTGGTATGCTGGATACACAGTGATGGAATGGGGGGAAGATATTAAAGCAATCGCTAAAGATGAA…
ENSMUSG00000045128	Rpl18a	0.19861450113286064	ribosomal protein L18A [Source:MGI Symbol;Acc:MGI:1924058]	ATGAAGGCCTCGGGCACGCTTCGGGAGTACAAGGTGGTGGGGCGCTGCTTGCCAACCCCAAAATGCCACACACCACCACTGTACCGTATGCGAATCTTTGCACCCAACCATGTGGTGGCCAAGTCCCGCTTCTGGTACTTTGTGTCACAGCTGAAGAAGATGAAGAAGTCATCCGGGGAAATTGTGTACTGCGGACAGGTGTTTGAGAAGTCACCCCTGCGTGTGAAGAACTTTGGCATCTGGCTGCGCTATGACTCCCGCAGTGGCACACACAACATGTATCGGGAGTACAGGGACCTGACCACTGCTGGTGCAGTCACACAGTGCTACCGAGACATGGGTGCCCGACACCGTGCCCGTGCCCACTCCATCCAGATCATGAAGGTGGAAGAGATTGCA…
ENSMUSG00000026632	Tatdn3	-0.11844671103220702	TatD DNase domain containing 3 [Source:MGI Symbol;Acc:MGI:1916222]	ATGGGTTTGGGGTTAGTGGACTGTCACTGCCATCTCTCCGCCTCGGACTTTGACAACGATCTGGATGATGTGTTGGAGAAAGCCAGGAAGGCTAATGTCATGGCCCTTGTGGCAGTTGCTGAACATGCAGGAGAATTTGAAAGAATTATGCAGCTTTCAGAAAGGTATAATGGATTCGTCCTGCCATGTCTGGGAGTTCACCCAGTTCAAGAGCTTTCACCAGAAAAACCAAGAAGCGTGACATTAAAGGATTTGGATGTAGCTTTGCCTATTATTGAGAAGTACAAGGATCGCTTGTTGGCAATCGGAGAGGTGGGGCTAGACTTCACCCCCAGATATGCAGGCACTGATGAGGAGAAGGAAGAACAAAGACAAGTCCTAATCAGACAAGTGCAACTG…
ENSMUSG00000087075	Lbhd2	0.3376178617598966	LBH domain containing 2 [Source:MGI Symbol;Acc:MGI:2685744]	ATGAGCACCCCACAGCCAGCAGCACCAGAGAGCCCCACTGAGGGCCCCAGAGGCCCAGCAGGGAAGGCTGCGGTAGGTGTCCGGGAGAAGGGCCCTTGGCTCTGTCAGCGACTGCCCTCTATTGTGGTGGAACCCACTGAAGCGGGTGCTGTGGAAAGCGGGGAGCTGCGTTGGCCACCTGAGGGTACACAGAGAGGTACCCCTCAGATCCAGGCTGCTGCTGCTCCTTCCCCAAGTCCACCAGGGAAGGAAGCAGATGATGATGTCATCCAGGGTGCCAGCTCCGGGCACCAGGCATTCCCTGCTCCAGTAACAGATGCGGGTGTGGCAGGCTCTACTCTCTGA
ENSMUSG00000118483	Gm5945	-0.16455867389556475	predicted gene 5945 [Source:MGI Symbol;Acc:MGI:3646000]	ATGTTTATCAGCAAGAGAGCTGCAAGAAATAGGACCCTTGCTGGTTTCCACATATTTGATGCCAGCATGGTCCTGCTAAACAAGTCTGCCAATCACCAAATAAGAGGTTTCACTTTAGCTACAATAGCACGCATAATGTGCAATACCTCTATGGCCCTTCCAGAATGGCGAAATTGCTACTTGAACAACTCCATGCTTTCCTACCCAAGTCTGGCTTTTGTGAATATTTGGGAGGCCTACATCTGCCACCACAACCACAACTCAAGCCACCTGAGAGATTGCCATTACTACACCTGCCATAACAACCTTGTTCCTTTGGATATCCGGGTATCTCAAATTCTGCTCCTGGTTGCAAACGTTGTTGGTCTGGTTGGGACAGTTTGTTCTGTCTTTGCTCTA…
ENSMUSG00000022864	D16Ertd472e	-0.7921739244573854	DNA segment, Chr 16, ERATO Doi 472, expressed [Source:MGI Symbol;Acc:MGI:1196400]	ATGAACGAAGAGGAGCAGTTTGTAAGCATTGACTTGAATGATGACAACATTTGCAGTGTTTGTAAACTGGGAACAGACAAAGACACGCTCTCCTTCTGCCACATTTGCTTCGAGCTAAATCTCGAGGGAGTGCCAAAGTCGAATCTTTTACACACCAAATCAGTGAGAGGCCATAAAGACTGCTTTGAAAAATACCATTTAATAGCAAACCAGGATTGTTCTCGTTCCAAGCTTTCCAAAAGTACTTATGAAGGAGTTAAAACCATCGTGAGTAAGAAGATAAACTGGATTGTGCAGTATGCCCAAAATAAAAATCTGGATTTGGAGTCCGAGTGTTCCAAAACTTCCCAGCATCCCCTGTTGAATTTCAGGCATAAGCCAGAGAAGAAATTGCTCCCA…
ENSMUSG00000024142	Mlst8	0.30183093515511095	MTOR associated protein, LST8 homolog (S. cerevisiae) [Source:MGI Symbol;Acc:MGI:1929514]	ATGAATACCACCCCAGGCACAGTGGGCAGTGACCCTGTCATCTTAGCAACTGCAGGCTATGACCACACGGTGCGCTTTTGGCAGGCTCACAGTGGAATCTGCACTCGAACAGTGCAGCATCAGGACTCTCAGGTAAATGCATTGGAGATTACTCCGGACCGAAGCATGATTGCTGCTGCAGGTTACCAACATATCCGCATGTATGATCTCAACTCCAATAACCCCAACCCCATCATCAGTTATGACGGAGTCAGTAAGAACATTGCATCAGTGGGCTTTCACGAGGATGGTCGCTGGATGTATACAGGTGGCGAGGACTGCACAGCTCGCATCTGGGACCTCAGGTCCCGGAACTTGCAGTGTCAGCGTATCTTCCAGGTGAACGCACCCATTAATTGC…
ENSMUSG00000001228	Uhrf1	-0.10575252993880477	ubiquitin-like, containing PHD and RING finger domains, 1 [Source:MGI Symbol;Acc:MGI:1338889]	ATGTGGATCCAGGTTCGAACTATGGATGGGAAGGAGACCCACACCGTGAACTCTCTGTCCAGGTTGACCAAGGTGCAGGAGCTGAGGAAAAAGATTGAGGAAGTGTTTCACGTGGAACCCCAACTACAGAGACTCTTTTATAGGGGCAAACAGATGGAGGATGGCCACACACTCTTCGATTATGATGTGCGCCTCAATGACACAATCCAGCTGCTCGTGCGCCAGAGTCTGGCACTGCCTCTCAGTACAAAAGAACGGGACTCGGAGCTCTCAGACTCTGACTCTGGCTATGGTGTGGGTCACAGTGAATCAGACAAGTCGTCCACGCATGGTGAAGGGGCAGCTGAAGCGGATGACAAGACTGTGTGGGAGGACACGGACCTGGGGCTGTACAAGGTC…
ENSMUSG00000025900	Rp1	-0.8478216878260626	retinitis pigmentosa 1 (human) [Source:MGI Symbol;Acc:MGI:1341105]	ATGAGTGACACACCTTCTACTAGTTTCTCCATGATTCATCTGACTTCTGAAGGTCAAGTTCCTTCCCCTCGCCATTCAAATATCACTCATCCTGTAGTGGCTAAACGCATCAGTTTCTATAAGAGTGGAGACCCACAGTTTGGCGGCGTTCGGGTGGTGGTCAACCCTCGTTCCTTTAAGACTTTTGACGCTCTGCTGGACAGTTTATCCAGGAAGGTACCCCTGCCCTTTGGGGTAAGGAACATCAGCACGCCCCGTGGACGACACAGCATCACCAGGCTGGAGGAGCTAGAGGACGGCAAGTCTTATGTGTGCTCCCACAATAAGAAGGTGCTGCCAGTTGACCTGGACAAGGCCCGCAGGCGCCCTCGGCCCTGGCTGAGTAGTCGCTCCATAAGC…
ENSMUSG00000024215	Spdef	-0.22040016253443992	SAM pointed domain containing ets transcription factor [Source:MGI Symbol;Acc:MGI:1353422]	ATGGGCAGTGCCAGCCCAGGCCTGAGCAACGTGTCCCCCGGTTGCCTGCTACTGTTCCCAGATGTGGCACCACGAACAGGGACGGAGAAGGCAGCATCAGGAGCAATGGGCCCTGAGAAGCAGGAATGGAGTCCTAGTCCACCCGCCACCCCTGAGCAGGGCCTGTCTGCTTTCTACCTCTCTTACTTTAACATGTATCCCGACGATAGCAGCTGGGTCGCCAAAGTCCCCGAGGCCCGTGCCGGGGAGGACCACCCGGAGGAGCCCGAGCAGTGTCCCGTCATTGACAGCCAGGCCTCTGGGAGCACGTTGGATGAGCACTCGCTAGAGCAGGTGCAATCGATGGTTGTGGGCGAGGTCCTGAAAGATATTGAGACGGCCTGCAAGCTTCTGAACATC…
ENSMUSG00000000957	Mmp14	0.4226381937185558	matrix metallopeptidase 14 (membrane-inserted) [Source:MGI Symbol;Acc:MGI:101900]	ATGTCTCCCGCCCCTCGACCCTCCCGCAGCCTCCTGCTCCCCCTGCTCACGCTTGGCACGGCGCTCGCCTCCCTCGGCTGGGCCCAAGGCAGCAACTTCAGCCCCGAAGCCTGGCTGCAGCAGTATGGCTACCTACCTCCAGGGGACCTGCGTACCCACACACAACGCTCACCCCAGTCACTCTCAGCTGCCATTGCCGCCATGCAAAAGTTCTATGGTTTACAAGTGACAGGCAAGGCTGATTTGGCAACCATGATGGCCATGAGGCGCCCTCGCTGTGGTGTTCCGGATAAGTTTGGGACTGAGATCAAGGCCAATGTTCGGAGGAAGCGCTATGCCATTCAGGGCCTCAAGTGGCAGCATAATGAGATCACTTTCTGCATTCAGAATTACACCCCT…
ENSMUSG00000059475	Zfp426	-1.1929989530248204	zinc finger protein 426 [Source:MGI Symbol;Acc:MGI:1920248]	ATGGACTTCCTGTTTCCACTTCCTAAGTGCTGGGATTCCAGGATGGCAGCTCCTGCTTCGTCCCATGGTCCTTCAGAGGACTCAGGCTGCCTTCAGGAACGAAAAATAGCAGCAGAAATGATGTTGGTTGATTGCCTGACAGATGATCAGGAGTTAGTGAGCTTTGAGGATGTGATTGTGGACTTTACCCAAGAGGAGTGGAGCTCACTGAACCCAGATCAGAGGAACCTCTACAGAGATGTGATGCTGGAGAACTACCAGAACCTGGCCACAGTAGGGTATCAGCTCATCAAACCCAGTTTGATCTCTTGGTTGGAACAAGAAGAGTTTAGTAAAGGTCAGAAGATAGTTTTCCCAGAATGGAAATTACAGCTCGAAACCAAATGTTCAGCGTTCCAG…
ENSMUSG00000054520	Sh3bp2	-0.3984170664580645	SH3-domain binding protein 2 [Source:MGI Symbol;Acc:MGI:1346349]	ATGGCGGGCTCAGGGTCGCGGCCGCGGAGCTGGGGCTGGCGAGAGACAGGCTCCAGGGACGAGGCTGCGGCCGGTGGGCCCACCTCGGGACCCTGTCGCTGCTCACAGGGAAGGCGGGCGCTGGCCGCCCCCCGGAAGCCGGCTGTGCCCGCCGCGTGGACACCCTTCATGGCGGCTGAGGAGATGCAGTGGCCTGTCCCCATGAAGGCCATTGGTGCCCAGAATTTGCTGACCATGCCTGGTGGTGTGGCGAAGGCTGGTTACCTGCATAAGAAGGGTGGCACCCAACTGCAGCTGCTCAAATGGCCCCTCCGCTTTGTGATCATCCACAAGCGCTGCATCTACTACTTCAAGAGCAGCACATCTGCCTCCCCACAGGGTGCCTTCTCACTGAGTGGC…
ENSMUSG00000022403	St13	0.38185682784047725	suppression of tumorigenicity 13 [Source:MGI Symbol;Acc:MGI:1917606]	ATGGATCCCCGCAAAGTGAGCGAGCTTCGGGCCTTCGTGAAGATGTGTAGGCAGGACCCGAGCGTCCTGCACACCGAGGAAATGCGCTTCCTGAGGGAGTGGGTGGAGAGCATGGGGGGGAAAGTACCACCTGCTACTCATAAAGCTAAGTCAGAAGAAAACACCAAGGAAGAAAAAAGAGACAAGACGACAGAGGAAAACATAAAGACAGAGGAGCTATCAAGCGAGGAGAGCGATCTAGAAATTGACAATGAAGGTGTAATTGAACCAGACACTGATGCCCCTCAGGAAATGGGAGATGAAAATGCAGAGATAACCGAGGAGATGATGGATGAAGCAAATGAGAAGAAGGGGGCTGCCATTGAAGCCCTAAATGATGGTGAGCTCCAGAAAGCCATT…
ENSMUSG00000096630	Vmn2r26	-0.1311512248851537	vomeronasal 2, receptor 26 [Source:MGI Symbol;Acc:MGI:2678394]	ATGAAATTACTCACTGCTTTCTCTCCCCTAGTTGTTCTCATTTTATTCCAGGAACAAATTTCTTGTTACTACTTAACTAAATATGCTTCTTCTGGCTACTATCAAGATGCAGATTTTGTTATTGGAGGACTCTTTTCCCTTAGAGTGACTGATGGAGATACATTTATAAGTAGATCTGGCGTTGAAGATACAAGCCATATAGCAGAATATGTTTTTGCGGATCTCATTAAATATTATCAGCACATTTTAGCAATGGTTTTTGCTATAGAAAAAATCAACAAGGACCCAAATATTCTATTCAACAAGTCCCTGGGATTCTTTCTCTTCAATGTCAACTTCATTGAGATGAAGGCTGCGGAAGGTTCTATGGCTTTGCTCTCAGGAGAGAGCCCCCCAATT…
ENSMUSG00000092077	Olfr101	0.2654947067603566	olfactory receptor 101 [Source:MGI Symbol;Acc:MGI:2177484]	ATGTCTAATCAAACCTCAGTCACTGAATTTCTCCTCCTGGGAGTAACAGATATACAAGAATTAAACCCTATTCTCTTTGTGATTTTCTTCACCATCTACTTTATCAATATAACTGGAAATGGAGCCATCCTGATGATTGTCATCTTGGACCCAAGACTCCACTCACCTATGTATTTCTTCCTGGGAAACCTAGCATGTCTAGATATCTCCTATTCTACTGTAACAGTGCCAAAGCTGTTGCAGAACCTCCTCTCCACAAGCAAAGCTATTTCCTTCTTGGGATGCATAACTCAGCTTCATTTCTTCCACTTCCTGGGTAGCACTGAGACCATGCTGCTGCCAGTGATGGCATTTGACCGCTTTGTGGCTATCTGCAGACCACTCCACTATTCTGTGATC…
ENSMUSG00000002007	Srpk3	-0.05247372008737025	serine/arginine-rich protein specific kinase 3 [Source:MGI Symbol;Acc:MGI:1891338]	ATGAGTGCCAATGCCGGTGGTAGTGGTAGTGTGGATTGTGGCGGCAGCAGCAGCAGCTCTCAGACTTCCTGTGGGCCTGAGTCCTCAGGCTCTGAATTAACTCCAGCCACACCAGCACCTCGTTTGCTGCAGGGACTCCTGGGCTCTGATGATGAGGAACAGGAAGACCCTAAGGACTATTGCAAGGGTGGTTACTACCCAGTGAAGATCGGTGATTTGTTCAATGGGCGGTACCATGTGGTGCGAAAGCTAGGCTGGGGCCATTTCTCTACAGTCTGGCTCTGCTGGGATATTCAGCGCAAGCGCTTTGTGGCCCTGAAAGTGGTGAAGAGTGCAGGACATTACACTGAGACAGCCGTGGATGAGATCAAGCTCCTGAAATGTGTCAGGGACAGTGAC…
ENSMUSG00000044034	Npb	-0.520536422483067	neuropeptide B [Source:MGI Symbol;Acc:MGI:2387153]	ATGGCCCGGTGTAGGACGCTGGTGGCCGCTGCCCTGGCGCTGCTCCTGCCGCCAGCCCTCGCGTGGTACAAGCCCGCGGCGGGACCCCACCACTACTCGGTGGGCCGCGCCTCGGGGCTACTGTCGAGTTTCCACAGGTTCCCGTCCACGCGACGCTCCGAGTCTCCAGCACTCCGGGTGGGAACCGGACCTCTGCGCAATTTAGAGATGCGCCCCAGCGTAAGGAGCCTTGCCCTGTGTGTCAAAGATGTGACCCCGAACCTGCAGAGCTGCCAGCGGCAACTCAACAGCCGAGGGACTTTCCAGTGTAAAGCGGACGTCTTCTTGTCGCTGCACGAGACTGATTGCCAGAGCACCTGA
ENSMUSG00000029403	Cdkl2	-0.2035160339874996	cyclin-dependent kinase-like 2 (CDC2-related kinase) [Source:MGI Symbol;Acc:MGI:1858227]	ATGGAGAAGTACGAGAACCTAGGATTGGTTGGAGAGGGGAGTTACGGAATGGTGATGAAGTGTAGGAACAAAGACAGTGGAAGAATTGTGGCCATTAAGAAGTTCCTAGAAAGTGACGATGATAAAATGGTTAAGAAGATCGCAATGCGAGAGATCAAGTTACTAAAGCAACTGCGGCATGAAAATTTGGTGAATCTGTTGGAAGTATGTAAGAAAAAAAAACGTTGGTACCTAGTCTTTGAATTTGTTGACCACACGATTCTTGATGACTTGAAACTCTTTCCAAATGGACTAGACTATCAAGTAGTTCAAAAATATTTGTTTCAGATTATTAATGGAATTGGATTTTGCCACAGTCACAATATCATACACAGAGATATAAAGCCTGAGAATATATTA…
ENSMUSG00000053868	Gm5142	-0.22060507407581262	predicted gene 5142 [Source:MGI Symbol;Acc:MGI:3647352]	ATGAGAAGGAGGCAGCCAAGGGCTTTGGGAAGTCTTCGCAACCCGTTTCCTCCCCAGGCTTCCCCACTGTATGTTTTTCCCACCAGTGTTCACCTCATCCCTTCTCAGCAGACCATCTTTCATCCTGCTGTTCAAGTCAACCCTCTTTCTGTTTTCTACCCTACCACATTCCCTTCTCTGAGGAACACTTCCTACTTCCCCACTTTCATGATGGCCATGCCCAGCTCCTCCTGTCTATCCAAAATTTCCTCCAACTGCCCTGTTCTCTCTGCATCCCCTTCACATTTGTCTACCCTCATGACTACCTCTCCCAAGAAAGCACCGATGGATAGATACCTCCTTTCTGTTTCGCGTCTGAGGCCTTCAGCCAGCCAGGCCAACCAGAGGAACCTGAAATGC…
ENSMUSG00000021610	Clptm1l	0.3026032134146348	CLPTM1-like [Source:MGI Symbol;Acc:MGI:2442892]	ATGTGGAGCGGCCGCAGCTCTTTTACCAGCTTGGTGGTGGGCGTGTTCCTGGTGTACGTGGTGCATACCTGCTGGGTCATGTACGGTATCGTCTATACCCGTCCGTGCTCGGGTGACTCCAACTGCATCCAGCCCTATCTGGCCCTGCGGCCCAAACTGCAGCTGAGTGTTTACACCACCACACGGTCCAGCCTTGGTGCAGAGAACAATGTGGACCTGATCTTGAACGTGGAAGACTTTGATGTGGATTCCAAATTTGAAAGGACAGTTAATGTTTCTGTACCAAAGAAAACAAGAAACAATGGGACGCTGTATGCATATATTTTCCTACATCATGCTGGGATTCTACCCTGGCAAGATGGGAAACAGGTACATGTGGTCAGTACTCTGACTACCTAC…
ENSMUSG00000062372	Otof	0.23518865242428036	otoferlin [Source:MGI Symbol;Acc:MGI:1891247]	ATGGCCCTGATTGTTCACCTCAAGACTGTCTCAGAGCTCCGAGGCAAAGGTGACCGGATTGCCAAAGTCACTTTCCGAGGGCAGTCTTTCTACTCCCGGGTCCTGGAGAACTGCGAGGGTGTGGCTGACTTTGATGAGACGTTCCGGTGGCCAGTGGCCAGCAGCATCGACCGGAATGAAGTGTTGGAGATTCAGATTTTCAACTACAGCAAAGTCTTCAGCAACAAGCTGATAGGGACCTTCTGCATGGTGCTGCAGAAAGTGGTGGAGGAGAATCGGGTAGAGGTGACCGACACGCTGATGGATGACAGCAATGCTATCATCAAGACCAGCCTGAGCATGGAGGTCCGGTATCAGGCCACAGATGGCACTGTGGGCCCCTGGGATGATGGAGACTTC…
ENSMUSG00000038765	Lmx1b	-0.2001723436152579	LIM homeobox transcription factor 1 beta [Source:MGI Symbol;Acc:MGI:1100513]	ATGGATATAGCAACAGGTCCCGAGTCGCTGGAGAGGTGCTTCCCTCGCGGGCAGACGGACTGCGCCAAGATGTTGGACGGCATCAAGATGTTGGACGGCATCAAGATGGAGGAGCACGCCCTTCGCCCCGGGCCCGCCACCCTGGGGGTGCTGCTGGGCTCCGACTGCCCGCATCCCGCCGTCTGCGAGGGCTGCCAGCGGCCCATCTCCGACCGCTTCCTGATGCGAGTCAACGAGTCGTCCTGGCACGAGGAGTGTTTGCAGTGCGCGGCATGTCAGCAAGCCCTCACCACCAGCTGCTACTTCCGGGATCGGAAACTGTACTGCAAACAAGACTACCAACAGCTCTTCGCGGCAAAGTGCAGCGGCTGCATGGAGAAGATCGCCCCTACCGAGTTC…
ENSMUSG00000039067	Psmd7	0.472640651594768	proteasome (prosome, macropain) 26S subunit, non-ATPase, 7 [Source:MGI Symbol;Acc:MGI:1351511]	ATGCCGGAGCTGGCGGTGCAGAAGGTGGTGGTTCACCCCCTGGTGCTGCTCAGTGTGGTGGATCATTTCAACCGAATTGGCAAGGTTGGAAACCAGAAGCGGGTAGTTGGTGTGCTTTTGGGATCATGGCAAAAGAAAGTACTTGATGTATCCAACAGTTTTGCAGTACCTTTTGATGAAGATGACAAAGATGATTCTGTCTGGTTTTTAGACCATGATTATTTGGAAAACATGTATGGGATGTTCAAGAAGGTCAATGCCAGAGAAAGGATAGTTGGGTGGTACCACACAGGCCCCAAACTGCACAAGAATGATATCGCCATCAATGAACTCATGAAGAGATACTGCCCCAACTCAGTATTGGTCATTATCGACGTGAAGCCAAAGGACCTAGGACTT…
ENSMUSG00000025537	Phkg1	0.18119729441471935	phosphorylase kinase gamma 1 [Source:MGI Symbol;Acc:MGI:97579]	ATGACCCGGGATGACGCCCTCCCTGACTCGCATTCTGCACAGACTTTCTACGAGAACTATGAGCCCAAGGAGATCCTGGGCAGGGGAGTCAGCAGTGTGGTCAGGCGCTGCATCCACAAACCCACATGCCAGGAATACGCAGTGAAAATCATTGACATCACCGGAGGAGGAAGCTTTAGCTCTGAGGAGGTACAGGAGCTTCGGGAAGCCACCCTGAAGGAGGTGGACATCCTGCAGAAGGTCTCGGGACACCCCAACATCATACAGCTGAAGGACACTTACGAGACCAACACTTTCTTCTTCTTGGTATTTGATCTGATGAAGAGAGGGGAACTCTTTGACTATCTCACTGAGAAGGTCACCTTAACCGAGAAGGAAACCAGAAAGATCATGCGGGCC…
ENSMUSG00000091531	Olfr102	0.10055367790868344	olfactory receptor 102 [Source:MGI Symbol;Acc:MGI:2177485]	ATGTCTAATCAAACCTCAGTCACTGAATTTCTCCTCCTGGGAGTAACAGATATACAAGAATTAAACCCTATTCTCTTTGTGGTTTTCTTCACAATCTACTTTGTCAATATAACTGGGAATGGAGCCATCCTGATGATTGTCATCTTGGACCCAAGACTCCACTCACCTATGTATTTCTTCCTGGGAAACCTAGCATGTCTAGATATCTGCTTCTCCACTGTGACACTGCCAAAGATGCTGCAGAACCTCCTCTCCACAAGCAAAGCAATTTCCTTCTTGGGATGCATAACTCAGCTCCATTTCTTCCACTTCCTGGGTAGCACTGAGGCCATGCTGCTGCCAGTGATGGCATTTGACCGCTTTGTGGCTATCTGCAGACCACTCCACTATTCTGTGATC…
ENSMUSG00000026496	Parp1	0.23079360038762567	poly (ADP-ribose) polymerase family, member 1 [Source:MGI Symbol;Acc:MGI:1340806]	ATGGCGGAGGCCTCGGAGAGGCTTTATCGAGTGGAGTACGCGAAGAGCGGGCGCGCCTCTTGCAAGAAATGCAGCGAGAGTATTCCCAAGGACTCCCTCCGCATGGCCATCATGGTGCAGTCACCCATGTTCGATGGGAAAGTCCCACACTGGTACCACTTCTCCTGCTTCTGGAAGGTGGGCCACTCCATCCGGCAGCCTGATGTTGAGGTGGATGGCTTCTCTGAGCTGCGCTGGGATGATCAGCAGAAGGTCAAGAAGACGGCCGAGGCTGGAGGCGTGGCAGGCAAAGGCCAGGATGGAAGTGGCGGCAAGGCGGAGAAGACATTGGGTGACTTTTTAGCGGAGTACGCCAAGTCCAACAGGAGCATGTGCAAGGGCTGCCTGGAGAAGATAGAG…
ENSMUSG00000053411	Cbx7	-0.23789690907103597	chromobox 7 [Source:MGI Symbol;Acc:MGI:1196439]	ATGGAGCTGTCAGCCATAGGCGAGCAGGTGTTTGCGGTGGAGAGCATCCGGAAGAAGCGCGTGCGGAAGGGCAAAGTTGAATATCTGGTGAAGTGGAAAGGATGGCCCCCCAAGTATAGCACCTGGGAGCCAGAGGAGCACATCTTGGACCCTCGCCTTGTCATGGCCTACGAGGAGAAGGAGGAGAGAGACCGAGCCTCGGGGTATAGGAAGAGAGGTCCGAAACCCAGGCGGCTTCTGCTACAGCGGCTGTACAGCATGGACCTGCGGAGCTCCCACAAAGCCAAGGGCAATGAGAAGCTCTGCTTCTCTCTGGCGCGCCCGCTCCGCAGCGGGAGCCCCATGGGGGTGGTCAAGGCAGGGGTCGCTGAGCTGGTGGAGAAGGGCCCCTTGGTGCCC…
ENSMUSG00000117338	Gm49804	0.18848445613555279	predicted gene, 49804 [Source:MGI Symbol;Acc:MGI:6270466]	ATGTTGATGCCTAAGAAGAATCGGATTGCCATCTACGAACTCCTTTTTAAGGAGGGCGTGATGGTCGCCAAAAAGGATGTCCACATGCCTAAGCACCCGGAGCTGGCAGACAAAAATGTGCCCAACCTTCATGTAATGAAGGCCATGCAGTCTCTCAAGTCTCGAGGCTACGTGAAGGAACAGTTTGCTTGGAGACATTTCTACTGGTACCTTACGAACGAGGGCATCCAGTATCTCCGAGACTACCTGCACCTACCCCCGGAGATCGTGCCCGCCACCCTGCGTCGCAGCCGTCCCGAGACCGGCAGGCCTCGGCCCAAAGGTCCAGAGGGTGAGCGACCTGCAAGATTCACAAGAGGGGAGGCTGACAGAGACACCTACAGAAGGAGCGCTGTGCCC…
ENSMUSG00000024645	Timm21	-0.22432327835717655	translocase of inner mitochondrial membrane 21 [Source:MGI Symbol;Acc:MGI:1920595]	ATGATTTGTGCTTTTCTACGAGTTGTACAGCATGCGGAGAAGCTGCACGGGTCCTTGGGCAGGCAGTTGTTGCCACATTTTGTGTTCACCAAAGCTTGCTTTAAAACTCAGCCTTTGAGATGGGGGCTGCGAGAGCAGAAGATAACAGTACAACCTAGAACTGTCCTTAGGTTCACCCAGAAAACTTTCTGGACACAAGGACCGGACCCCCGGAAAGCAAAGGAGGATAGTACCAAGCAAGTGTCTATTCGCAGAAATCAAAGAGAGGAAACCGGCGTCTCAATGTCTCAGAAAGTGAGAGAAGCTGGGAGAGACGTCAGCTACTTGATAGTGGTGCTCTTTGGAGTCGGCCTTACAGGCGGCTTGTTATACGCGATCTTCAAAGAACTGTTTTTTTCG…
ENSMUSG00000024217	Snrpc	0.15624110487698853	U1 small nuclear ribonucleoprotein C [Source:MGI Symbol;Acc:MGI:109489]	ATGGCGGGTGGAGACCCAGGCTCTCCGGCCATCCTGGCAGAGTGGGCGCGGACCCTCGCTCAGAAGCCTCGCATTCTGTTTTATTGTGACTACTGTGATACGTATCTTACCCACGATTCTCCATCTGTGAGGAAGACACACTGCAGTGGTCGGAAACACAAAGAGAATGTGAAAGACTATTATCAGAAATGGATGGAAGAGCAGGCCCAGAGCCTGATTGACAAGACAACGGCTGCATTTCAACAAGGGAAGATCCCTCCTGCTCCGTTCTCTGCTCCTCCGCCTGCAGGGGCCATGATCCCACCTCCCCCCAGTCTCCCGGGCCCTCCTCGGCCTGGCATGATGCCTGCCCCCCACATGGGAGGCCCTCCCATGATGCCAATGATGGGCCCCCCTCCG…
ENSMUSG00000049618	Olfr103	0.14048282863709907	olfactory receptor 103 [Source:MGI Symbol;Acc:MGI:2177486]	ATGTTGAATCAAACCTCTGTCACAGAATTTATCCTTTTGGGAGTGAGAGACATACAAGAACCACAGCCCTTTCTCTTTGCTATTTTCTTCACCATCTACTTTGTCAATATAACTGGGAATGGAGCCATCCTGATGATTGTCATCTTAGACCCAAGACTCCACTCACCTATGTATTTCTTCCTGGGAAACCTAGCATGTCTAGATATCTCCTACTCCACTGTAACAGTGCCAAAAATGCTGGAGAACCTTCTCTCTACAAACAAAGCAATTTCCCTCTTGGGATGCATAACTCAGCTTCATTTCTTCCACTTCCTGGGTACCACAGAATCCCTGCTGCTAGCAGTGATGGCATTTGACCGCTTTGTGGCTATCTGCAGACCACTTCACTATTCTGTCATC…
ENSMUSG00000095858	Olfr104-ps	-0.09818772559935782	olfactory receptor 104, pseudogene [Source:MGI Symbol;Acc:MGI:2177487]	ATGTCTGCTCCTACCAGTGTATCTCAAGAAGGTAATTCAGTGTTATTGAATCACACATTAGTCACTGAATTTCTCCTCTTGGGGGTGACAGACATTCAAGAATTAAACCCTATTCTCTTTGTCACGGTCCTTGCCATGTATTTTGTCAATGTGGCTGGGAATGGAGCCATCCTGATGATCGTCATTTCAGATCCAAGACTCCACTTGCCTATGTATTTCTTCCTGGGAAACCTAGCATGCCTAGATATCTGCTTCTCCACTGTAACAGTGCCAAAGATGTTAGAGAACTTCTTCTCTACAAGCAAAGCAATTTCCTTCTTGGGATGCATAACTCAGCTTCATTTCTTCCACTTCCTGGGTAGCACAGAAGCCCTGCTGCTGACAGTCATGGCATTTGAC…
ENSMUSG00000035522	Tsga8	0.46351688648013634	testis specific gene A8 [Source:MGI Symbol;Acc:MGI:1194903]	ATGGATGTTCCGACTTCATCCACCGATTCTCAGGAGGTGAAGCCTATAATGCCAATTAGGACCAAGGCAGCCTGCAAGTTTTATCCTCCTCACATTCTTTGTGGAAAGGGTGCGAAGACCAACAAGCGTGGGAAACGCGGTGGCGCCCAAAAGGCTTCCACAAAGAAAGACATCGGAGAAACTACTCCACCTGTGGCTAAGAAGTCCAAAGTGGCCAAGGAGCCAACCATGCTGGCGGCAGCAGCCGCCCCTGAGGCAGCAGCCTCACCTGAGTCATCAGCCGCAGCAGCCGCCCCTGAGGCAGCAGCCTCACCTGAGTCATCAGCCGCAGCAGCCGCACCTGAGGCAGCAGCCTCACCTGAGTCATCAGCGGCAGCAGCCGCACCTGAGGCAGCAGCC…
ENSMUSG00000024729	Ms4a20	0.02801812228890457	membrane-spanning 4-domains, subfamily A, member 20 [Source:MGI Symbol;Acc:MGI:1916619]	ATGTCAATAAATGAAGTATCAACATTCTATATCATAAAAGAAGATACAATTGCAATGGGAGGTGCACAAATAATGCTTGGCCTAATTCACAATGCACTGGGGACTCTCTGGCTCTCTTTGCACAATCTAGAAGACAAGAGATATAGCATCGGCCATAAACTTATGTTAGCTAGTATCTGCTACCTGTTTGTGTCTGGAACATTTTTCATCAACTCAGGATCCAGCAGTATAACTCAGGGTATTTCTTCAGTATTTCAGCATATGTTTGCAATTATAACAAACATCATAAGTATCTTCGTGGCTATATTTGGTTTAATTCTACTTGGATATGAATTTCCAATTTTTGAATCAATAGGAACTGAATACATTTGGTCAAATATGGCTGGCATGATGCTTCTA…
ENSMUSG00000094884	Olfr105-ps	0.1328547135722621	olfactory receptor 105, pseudogene [Source:MGI Symbol;Acc:MGI:2177488]	ATGTCTGCTCCTACCAGTGTATCTCAGGGAGGATATTCAGACATACAAGAATTGAACCCTATTCTTTTTGTCATGGTCCTTGCCATGTACTTTATAAATGTGTTTGGGAATGGAGCCATCATGATGATTGTCATCTTGGATTCAAGACTCTACTCACCTATGTATTTCTTCCTGGGAAACCTAGCATGTCTAGATATCTGCTTCTCCACTGTAACAGTGCCAAAGATGCTAGAGAACTTCTTCTCCACAAGCAAAGCAATTTCCTTCTTGGGATGCATAACTCAACTTCATTTCTTCCACTTCTTGGGATGTACAGATGCCCTGCTGTTGACAGTCATGGCATTTGACCGCTTTGTGGCTATCTGCAGACCACTCCACTACCCTTCCATCATGAACCGT…
ENSMUSG00000045103	Dmd	-0.34970665804275913	dystrophin, muscular dystrophy [Source:MGI Symbol;Acc:MGI:94909]	ATGCTTTGGTGGGAAGAAGTAGAGGACTGTTATGAAAGAGAAGATGTTCAAAAGAAAACATTCACAAAATGGATAAATGCACAATTTTCTAAGTTTGGAAAGCAACACATAGACAACCTCTTCAGTGACCTGCAGGATGGAAAACGCCTCCTAGACCTCTTGGAAGGCCTTACAGGGCAAAAACTGCCAAAAGAAAAGGGATCTACAAGAGTTCATGCCCTGAACAATGTCAACAAGGCACTGCGGGTCTTACAGAAAAATAATGTTGATTTAGTGAATATAGGAAGCACTGACATAGTGGATGGAAATCATAAACTCACTCTTGGTTTGATTTGGAATATAATCCTCCACTGGCAGGTCAAAAATGTGATGAAAACTATCATGGCTGGATTGCAGCAA…
ENSMUSG00000026536	Ifi211	-0.13380646499045942	interferon activated gene 211 [Source:MGI Symbol;Acc:MGI:3041120]	ATGGTGAATGAATACAAGAGAATTGTTCTGCTGAGAGGACTTGAATGTATCAATAAGCATTATTTTAGCTTATTTAAGTCATTGCTGGCCAGAGATTTAAATCTGGAAAGAGACAACCAAGAGCAATACACCACGATTCAGATTGCTAACATGATGGAAGAGAAATTTCCAGCTGATTCTGGATTGGGCAAACTGATTGAGTTTTGTGAAGAAGTACCAGCTCTTAGAAAACGAGCTGAAATTCTTAAAAAAGAGAGATCAGAAGTAACAGGAGAAACATCACTGGAAAAAAATGGTCAAGAAGCAGGTCCTGCAACACCTACATCAACTACAAGCCACATGTTAGCATCTGAAAGAGGCGAGACTTCTGCAACCCAGGAAGAGACTTCCACAGCTCAG…
ENSMUSG00000026574	Dpt	0.03722698954175954	dermatopontin [Source:MGI Symbol;Acc:MGI:1928392]	ATGGACCTCACTCTTCTGTGGGTTCTTCTGCCACTGGTGACCACAGCCTGGGGCCAGTATGGTGGCTACGGGTACCCATACCAGCAGTACCAGGACTACGGTGATGATGGATGGGTGAATCTTAACCGCCAAGGCTTCAGCTACCAGTGTCCCCACGGGCAAGTGGTGGTAGCTGTGAGGAGCATCTTTAGCAAGAAGGAAGGCTCTGACAGACAATGGAACTATGCCTGCATGCCTACACCCCAAAGCCTGGGGGAGCCCACTGAGTGCTGGTGGGAGGAGATCAACAGGGCCGGCATGGAATGGTACCAGAAGTGCTCCAACAATGGATTGGTGGCGGGGTTCCAGAGCCGCTACTTCGAATCAGTGCTGGATCGTGAGTGGCAATTTTACTGCTGC…
ENSMUSG00000027104	Atf2	-0.5425916462431583	activating transcription factor 2 [Source:MGI Symbol;Acc:MGI:109349]	ATGAGTGATGACAAACCCTTTCTATGCACTGCCCCTGGGTGTGGCCAGCGTTTTACCAACGAGGATCATTTGGCTGTCCATAAACATAAACATGAGATGACACTGAAATTTGGTCCAGCACGTAATGACAGTGTCATTGTGGCTGATCAGACTCCAACGCCAACAAGATTCCTAAAAAACTGTGAAGAAGTGGGTTTGTTCAATGAGTTGGCAAGTCCATTTGAAAATGAATTCAAGAAGGCTTCCGAAGATGACATTAAAAAAATGCCTCTAGATTTGTCCCCTCTTGCAACACCCATCATAAGAAGCAAAATTGAGGAGCCTTCTGTTGTAGAAACAACTCACCAGGACAGCCCTTTACCTCACCCCGAGTCGACTACCAGTGATGAAAAGGAAGTA…
ENSMUSG00000056941	Commd7	-0.20820285112424539	COMM domain containing 7 [Source:MGI Symbol;Acc:MGI:1914197]	ATGGGCCGCCTGCACTGCACGCAGGACCCGGTGCCCGAGGCCGTGCGCGGAGACATGCAGCAGCTGAACCAGCTGGGCGCTCAGCAGTTCTCCGACCTGACAGAAGTGCTTTTCCATTTCCTAACTGAGCCCAAAGAGGTGGAGCGATTTCTGGCTCAGCTCTCTGAATTTGCCACCAGCAATCAGATCAGTCTTGGCCCCCTCAAAAGCATCATGAAAAGCCTCCTACTGGTTCCAAATGGTGCACTGAAGAAAGGCCTCACTGCCGAGCAGGTGCGGACTGATCTCCAGACGCTAGGTCTTAGCGAGGAGAAAGCCACTTACTTTTCTGAAAAGTGGAAGCAGAACGCCTCGACCCTTGCACAGTGGGCCATGGGTCAGACCCTGATGGTTAACCAG…
ENSMUSG00000032562	Gnai2	0.7579639114514928	guanine nucleotide binding protein (G protein), alpha inhibiting 2 [Source:MGI Symbol;Acc:MGI:95772]	ATGGGCTGCACCGTGAGCGCCGAGGACAAGGCGGCAGCCGAGCGCTCTAAAATGATCGACAAGAACCTGCGGGAGGACGGCGAGAAGGCGGCGCGGGAGGTGAAGTTGCTTCTGTTAGGTGCTGGAGAGTCAGGGAAGAGCACCATCGTCAAGCAGATGAAGATCATCCATGAAGATGGCTACTCAGAAGAGGAGTGCCGGCAGTACCGTGCCGTGGTCTACAGCAACACCATCCAGTCTATCATGGCCATCGTGAAGGCCATGGGCAACCTGCAGATCGACTTTGCTGATCCCCAGCGTGCGGATGATGCCAGGCAGCTGTTCGCCCTGTCCTGTGCTGCAGAGGAACAAGGGATGCTTCCTGAAGACCTGTCCGGTGTCATCCGGAGGCTCTGGGCT…
ENSMUSG00000026573	Xcl1	0.33457885761831196	chemokine (C motif) ligand 1 [Source:MGI Symbol;Acc:MGI:104593]	ATGAGACTTCTCCTCCTGACTTTCCTGGGAGTCTGCTGCCTCACCCCATGGGTTGTGGAAGGTGTGGGGACTGAAGTCCTAGAAGAGAGTAGCTGTGTGAACTTACAAACCCAGCGGCTGCCAGTTCAAAAAATCAAGACCTATATCATCTGGGAGGGGGCCATGAGAGCTGTAATTTTTGTCACCAAACGAGGACTAAAAATTTGTGCTGATCCAGAAGCCAAATGGGTGAAAGCAGCGATCAAGACTGTGGATGGCAGGGCCAGTACCAGAAAGAACATGGCTGAAACTGTTCCCACAGGAGCCCAGAGGTCCACCAGCACAGCGATAACCCTGACTGGGTAA
ENSMUSG00000072791	Abcb5	0.18730240371043785	ATP-binding cassette, sub-family B (MDR/TAP), member 5 [Source:MGI Symbol;Acc:MGI:1924956]	ATGGCAAATTCTGAAAGAACCAACGGGTTGCAAGAAACTAATCAGAGATATGGACCTCTGCAAGAACAAGTGCCTAAAGTGGGAAATCAAGCTGTTGGACCTATTGAGATATTCCGCTTTGCTGATAATCTGGACATTGTCCTCATGACTCTGGGAATATTAGCATCCATGATAAATGGAGCCACCGTTCCTTTAATGTCCCTGGTTTTAGGAGAAATAAGTGATCATTTAATTAATGGATGCCTAGTACAAACTAACAGAACTAAATATCAGAACTGTTCTCAGACTCAAGAAAAGCTGAATGAAGATATCATTGTGTTGACTCTATATTATATTGGAATAGGAGCAGCTGCCCTCATTTTTGGCTATGTACAGATTTCCTTCTGGGTCATAACTGCA…
ENSMUSG00000045039	Megf8	-0.3101478386424531	multiple EGF-like-domains 8 [Source:MGI Symbol;Acc:MGI:2446294]	ATGGCCTTGGGTGGAGCTCTGGCCTTGGCCCTTGCACTGGCCTTGGCAGTGCTGGGACCGCTGTCCCTCAGGGTCCTGGCTGGTGACTGCAAGGGGCAGCGGCAGGTGCTACGGGAGGCGCCAGGCTTCGTGACGGATGGTGCGGGCAACTACAGCGTCAACGGCAACTGCGAGTGGCTTATCGAGGCCCCGAGCCCTCAGCACCGGATCCTGCTGGACTTCCTTTTCCTGGACACGGAGTGCACTTATGACTACCTCTTTGTGTATGACGGTGACTCGCCCCAAGGCCCTCTGCTTGCTAGTCTGAGTGGGAGCACCCGGCCCCCACCCATTGAGGCTTCCTCAGGCAAGATGCTCCTCCACCTCTTCAGCGATGCCAACTACAACCTGCTGGGCTTT…
ENSMUSG00000034173	Zbed5	-0.26659392757053324	zinc finger, BED type containing 5 [Source:MGI Symbol;Acc:MGI:1919220]	ATGCCACGTGGAAGCCGAATCCGCACTTCCCGCGTGACCCTTCTGGCCGGCCGGGCCCCTCAGATGAGGGCTGCTCCCCGAAGAGCACCTGCAGCTCAGCCTCCAGCAGCAGCTGCGCCATCTGCAGTTGGCTCACCTGCCGCTGCGCCCCGGCAGCCAGGCCTGATGGCCCAGATGGCTACCACCGCGGCCGGTGTGGCTGTGGGCTCTGCAGTGGGACACACCCTGGGTCACGCCATCACTGGGGGCTTCAGCGGAGGTGGCAGTGCTGAGCCCGCAAAGCCCGACATCACTTACCAGGAGCCTCAGGGAGCCCAGCTGCAGAACCAGCAGTCTTTTGGACCTTGCTCTCTAGAGATCAAGCAGTTTCTGGAGTGTGCTCAGAACCAGAGCGATGTC…
ENSMUSG00000042631	Xkr7	-0.07322610903052071	X-linked Kx blood group related 7 [Source:MGI Symbol;Acc:MGI:3526711]	ATGGCCGCGAAGTCGGATGGAGCGGCGGCCGTGGCCGGCCCGGGGCCCGAGGGGCCGGCGGGAGCAGATCGGGGCGGGGCGGGAGGGCGCGGGGAGGCTGCGGCGGGGATCGCGGGCCCGGGACCGGTGGAGGCGGGGTGCCCGGGGCCACGCTACGAGCTGCGGGACTGCTGCTGGGTGCTGTGCGCGCTGCTCGTGTTCTTCTCCGACGGCGCCACCGACCTGTGGCTGGCGGCCTCCTACTACCTGCAGGGTCAGAGCACCTACTTCGGCCTCACCCTGCTCTTCGTGCTGCTGCCCTCACTGGTCGTGCAGCTGCTCAGCTTCCGCTGGTTCGTCTACGACTACTCGGAGCCCGCGGGGACCCCGGGACCCGCCGTCAGCACCAAGGACAGCGAC…
ENSMUSG00000031813	Mvb12a	-0.05974306490175793	multivesicular body subunit 12A [Source:MGI Symbol;Acc:MGI:1920961]	ATGGATCCCGGGACGGACTCGGCGCCGCTTGCTGGCTTGGTTTGGTCGTCGGCCTCGGCGCCGCCGCCGCCGGGTTTCAGCGCGATCACCTGCACCGTGGAGGGCGGGACGGCCAGCTTCGGCCGAGGCTTCGCGCAGAAAGCCGGCTACTTCCTGTGCCTGAGCACGCTGGGCATCCCGGAGAACCCTCAGGACAATGTGGTAGTGGACATGCAGATCGTGATGGACAAGGGCCCACTGCCGTCAGGCTTCTCTGCAGTCAACGACCCTCAGGATATCAAGGCCTCTGTGTCCAAGAAGAAACGCATGTGTGTGAAGCTGATGCCCCTGGGGACAGCTGACGTGGTTGTGAGTGACGTGAAGCTGAGTGGGAAGACTAAGACCGTGCCTGGATACCTG…
ENSMUSG00000068252	Apol7b	0.24659871665116853	apolipoprotein L 7b [Source:MGI Symbol;Acc:MGI:3583950]	ATGGGCACTCCAGACAGAGAATGCTTCATTGAGACTGTGGCTGAGTACCTCCTGGATGTGATAAGCACAGAGGACCTGCAGCTCCTGCTGACAGAAGAGGAAACCTGGAAACACTTTGTGGCAGAAGTTGATTTGTCCAGGGAAGAGGAAACTGCCTTGCGAGAAGCTCTTGCAGAGATCTTTTCAGATCCTGATGGAGAAGATGAAGATGAGCTCCAAAATGACCTGCAGGACAAGAACGAGAGGAAAGAGGAAGATGCCTTGAGTGAAGCCCTGGGTGAGACCGTAGCTGATACTGATGCAGAAGATGAAGAAGAGATCCAAAATGACCCGTGGCACAAGGAAAGGTTCTTGGATGCTTATCCTCGGGTGAAACTGGAGCTTGAGGAGAGCATCAGG…
ENSMUSG00000051728	Fam243	-0.007294456886012577	family with sequence similarity 243 [Source:MGI Symbol;Acc:MGI:1922578]	ATGGCTCGCTTCACAAACTGTCTTCTGAAAAACATCTTTACCAGAAGTCAGTTTGACAGCGCCAAGAGGAGACAGTGCCTTCAGTATCTCAACGCTCTGAGATCGCTGCAACACAATGGATACAAGACCGTGTATTTTGGGGAAACTGAGATCCCAGAAACTCTTGTCACTGGGGAGGACTTTAGTGACAGCTATTACATTCACACACCATCGTGGTGTATCCTACACGCTGGGGGCAGTCAAGGATGGGTGCCTTGGAAATATCGCATGTTCCTGAGAAATGACCTGTGCATCAAGAAGGAAGACAGCCTGTTCTTGGAGTTCTGTGATGTTGTGAAGAGGGCCTATGGCAAGTGTGCCATCGTGGTCAAAGGGAGAAGGCAGCAAGATGAGATGAAG…
ENSMUSG00000070354	Evi2	-0.3038130811022294	ecotropic viral integration site 2 [Source:MGI Symbol;Acc:MGI:5439444]	ATGGAATTCAAGTATCTGGTCTTCATTGTGCTTTGTCAATACCTGGACAATACGTTTTTCTCAGAGACAGAAGCAATTACAACAGAGCAGCAATCACTGTCTACTTTAATCACACCGTCGTTATATGTTACAACTGATTCTCAAAACACAGCAGGGAATGCTTTGAGTCAGACAACAAGATTCAAGAACATTTCTTCTGGACAGCAAGCATCACCTGCCCAAATCACTCCTGAACAAGCAACACCAGCTGTTTATGTCTCTTCAAGCCCACTTACTTATAACATTACCAGACAAGCAGAATCAGCGGTCAACAACTCCTTGCCTCAAACATCACCATCTGGGTTCACTTTGACCAATCAGCCATCACCTTCTACCTATAATTCTACTGGACAACCACCA…
ENSMUSG00000049349	Gm5105	-0.011973960200010045	predicted gene 5105 [Source:MGI Symbol;Acc:MGI:3645344]	ATGGATGTGTTTGGTGCTGATGCTGCAATCCACAGAGCTCATGTACTCTCCATTTCAGCTTTCTCCCGAGACTTCTACTTACCTTTTGTTAAAATGCTACGCAATGCTGGATGCTGTCGGACGTGTGCAGAGACTGCAGTATGGTCATGGAAAAAAGTTGGAGGAGATGAAGGAAGATGGGGGTGTGGAGTGAGTGGCGTGCCCTGGGCATCTCCAGCTGGTCCGTGTGCTTTCTGTGCCAGGGAGCTCTGCTCGGCAAGGCCAACAGGACAGAGATGGACTGATTCGGCTTTCAACTGTCACCGGTCACCAAATGACTTATCTTGTTTTCCTGGGTAG
ENSMUSG00000024213	Nudt3	0.14182777203702526	nudix (nucleotide diphosphate linked moiety X)-type motif 3 [Source:MGI Symbol;Acc:MGI:1928484]	ATGATGAAGCTCAAGTCGAACCAGACCCGCACCTACGACGGCGACGGCTACAAGAAGCGGGCCGCGTGCCTGTGCTTCCGCAGCGAGAGCGAGGAGGAGGTGCTGCTTGTGAGCAGTAGCCGCCATCCAGACCGATGGATTGTCCCCGGAGGAGGCATGGAGCCTGAGGAGGAGCCAAGTGTGGCAGCTGTCCGGGAAGTGTGTGAGGAGGCTGGAGTGAAAGGGACACTGGGAAGACTAGTTGGAATTTTTGAGAACCAGGAGAGGAAGCACAGGACCTACGTGTATGTGCTCATCGTCACGGAGGTGCTGGAAGACTGGGAGGACTCGGTGAACATCGGAAGGAAGAGAGAGTGGTTTAAAATAGAAGACGCCATAAAGGTGCTGCAGTGTCACAAG…
ENSMUSG00000094860	Btbd35f27	-0.36285894392857265	BTB domain containing 35, family member 27 [Source:MGI Symbol;Acc:MGI:3781937]	ATGGGGCTTTTAGTCAGCAGGGTCTTGAGATGCAGGGATTCCAGTCTGTTAGAGCCACAGCCAGAAGCCATAGCCGGAGCCAGCTACATTCCTGGCAGTCGCAAGCTAAAAAGAAACAGTTTGGAGGAGTTGGCAACAAGTTCTAATGTTCATGGACCTCAAAACCAGGGAATGTATCCACATCAAGTTCTCAACTACATCTACTGGAAAAGGGTTAAGATCTCATCTAATGATGCTTATCAAAACTTATTTTTGGACGGGCATGATAGCCACATTAAAATCCGTGCTCTGGGAAAAACATGGTGTTTACACAAAGTATTTTTATGTCAGTCAGGCTACTTTGCTAACATTCTCAAAGGTACTTGGAGAGAATCACACCATGGTGTTATAAATCTGATC…
ENSMUSG00000090066	1110002E22Rik	-0.3849244409615541	RIKEN cDNA 1110002E22 gene [Source:MGI Symbol;Acc:MGI:1915066]	ATGCTTTCCGTTCATTTCTGGCAGACCCCTGTCCGACCTACAGATGCTGCTTCGTCGCTGGCTAATGGCATTCAGACCCCCACCCACCGACGCTGTCAGACAAGCAACTGGACTGGACAGCTCAGCAGCAGGACACTGGCCACAATCGCGGCCAGAGCCGCAGCCCCCTGGCTACAGACCACCTCTGCTGCCTCTTTTGGGAGCCCTCCCACCTCCCTCTGGCTTGCCGAGGCCCCACCACAGGGGCTGAAGAACTGGGCGGTGGTGGCAACTGTGGCAGTGGTACCTACAGCCTTGGGGCCAGCCCAAGCACGTGGGAACCTGTTTCAGGCCACTCTGTGGCCCCTCCGGGACCAGAGGGGGACCCAGGACAGCCCCAGCGCTCACCACTGCCTCATC…
ENSMUSG00000069971	4933402J07Rik	0.05098663563141673	RIKEN cDNA 4933402J07 gene [Source:MGI Symbol;Acc:MGI:3607717]	ATGACAGAAGTGGTAGAAGACACCGAGAATCTGATGCCCACTGAGAGGAAGTCCTTCTGGAGGTCAGCTGAGGAGAGGCGAATGTCTGACCTGACCCGGGTGCTGGAGTGGCTGGAGCGGAGGCAGGGCAAGAAGCGCGCCCTTCAGAAAAAGAAGGAAGAGACAAAGAGTACAGAAGAGAAGGCAGGAAAGAAAAACGTAGGCGCTAAGAAGAAGCTAGAAAAAGTCAGCCGCAAAGTGACCTTCCACAAGGGCTACGTACGTCCTGTCAAGAAGAAGGAACCCACCATTTACCACAAGAGAAATGAAATAGACCTAAAGAGCAAGCGTCTGAGCATGATCACTGCCAACTTCAGGGATAGCAATAAGAAGTCTGGTCAGTCTGGATCCAGAAGAACA…
ENSMUSG00000034509	Mad2l1bp	-0.030702660880590125	MAD2L1 binding protein [Source:MGI Symbol;Acc:MGI:1913841]	ATGGCTGCGTCCGGTGAGGAGGATATGTCCGAACTGTCCCCTGCTGCTGCCCCAAATTTGGATTGGTATGAGAAGCCGGAAGAAACTCATGCTCCTGAAGTAGATCTTGAGACTGTCATCCCGCCAGCCCAGGAACCTTCCAATCCTGCGGAGCCCTTTTGCCCAAGAGACCTGGTGCCGGTGGTGTTTCCCGGGCCTGTGAGCCAGGAAGACTGCTGCCAGTTTACTTGTGAACTTCTCAAGCATATCCTGTACCAGCGCCATCAGCTCCCTCTGCCCTATGAACAGCTGAAGCACTTCTACCGGAAAGTTCCCCAGGCAGAGGACACAGCAAGGAAGAAAGCTTGGCTCGCCACGGAGGCGAGGAACAGGAAGTGTCAGCAGGCTTTGGCGGAGCTG…
ENSMUSG00000034391	Fbxo15	-0.2480537684860141	F-box protein 15 [Source:MGI Symbol;Acc:MGI:1354755]	ATGGCGAGCGGACGCGGTCGGATGCTGAGGGGATGTTTTGGCCTCCAGGCGCAGCGAGGGTCACTTCATGGTGGGGGCGCTACCTGGGGCAGCGCGGGACAGGCCGCGGGGCGCTCCGGGTTCAGTTTTAGAAGTAAGTTTGTTAGAGGCTCATCTGTCACGAAGCAGCATGCCTGGCGAAACCAGCACAGCGAGAAGCGTTGCTCTTCCTCCATCAGTTCTATATCCCTGGACAGAATGCCATCGGAAATCTTGGTGAAGATACTTTCTTACTTGGATGCGGTGACCTTGGTGTGCATTGGATGTGTGAGCAGACGCTTTTATCATTTGGCTGATGACAATCTTATTTGGGTCAGGAAGTACGCAGCTGCATTTAGATCAAAAAGATCACGTTGGAAA…
ENSMUSG00000070493	Chchd2	0.04076427068109148	coiled-coil-helix-coiled-coil-helix domain containing 2 [Source:MGI Symbol;Acc:MGI:1261428]	ATGCCGCGTGGAAGCCGAAGCCGCACTTCCCGGGTGACTCCTCCGGCCAGCCGGGCCCCTCAGATGAGGGCTGCTCCCCGAAGAGCACCTGCAGCTCAGCCTCCAGCAGCAGCTGCGCCATCTGCAGTTGGCTCACCTGCCGCTGCGCCCCGGCAGCCAGGCCTGATGGCCCAGATGGCTACCACCGCGGCCGGTGTGGCTGTGGGCTCTGCAGTGGGACACACCCTGGGTCACGCCATCACTGGGGGCTTCAGCGGAGGTGGCAGTGCTGAGCCCGCAAAGCCCGACATCACTTACCAGGAGCCTCAGGGAGCCCAGCTGCAGAACCAGCAGTCTTTTGGACCTTGCTCTCTAGAGATCAAGCAGTTTCTGGAGTGTGCTCAGAACCAGAGCGATGTC…
ENSMUSG00000039639	Kcne1	0.2702302591706798	potassium voltage-gated channel, Isk-related subfamily, member 1 [Source:MGI Symbol;Acc:MGI:96673]	ATGAGCCTGCCCAATTCCACGACTGTTCTGCCCTTTCTGGCCAGGCTGTGGCAGGAGACAGCTGAACAGGGCGGCAACGTGTCCGGCCTGGCTCGTAAGTCTCAGCTCCGAGATGACAGCAAGCTAGAGGCGCTCTACATCCTCATGGTGCTGGGCTTCTTCGGCTTCTTCACCCTGGGCATCATGCTGAGTTACATCCGATCCAAGAAGCTGGAGCACTCCCACGACCCTTTCAACGTGTACATCGAGTCAGATGCCTGGCAGGAGAAAGGCAAGGCCGTCTTCCAGGCCCGTGTCCTGGAGAGCTTCAGAGCTTGCTATGTCATTGAAAACCAGGCGGCCGTAGAGCAGCCTGCCACACACCTTCCTGAACTGAAGCCATTGTCGTGA
ENSMUSG00000118607	AC147806.2	-0.02725965222641333	predicted 7592 [Source:NCBI gene;Acc:101055758]	ATGACGGTACTGTGCGAATTGTTCAATGAGGTCAACATGGAGAAGTACCCCGATTTGAATCTCATTCGTAGAAGCTTTGAATGTGGAGCCAAGCCAGCCCTGAAGACCATGAACTCGTCTTCTGAGCATTGCAACGTATCTGACTGGCTGAGACTAGAGGCAACCGTGAAGGCCTCTGTGTACGTGGTGGCTTTCTCAATCACCACATCTCTCACCGTTGTCATTATCGCAATAGTGTCACAGAGTCTGCAGCTGAGGAAAGAGGTGCGGCTGGTCCTCCTCTGCCATCACCTGCTTTGTATCTCCTCCTACTGTGGCCTGGGGGTCGTCTTCCAAGGAATGCGGGCCTTACTGGCCAACAGCCCCCTCCTGCTGTGTTGGCTGGTATTTGGGGCGCAG…
ENSMUSG00000027433	Xrn2	-0.0937310375084138	5'-3' exoribonuclease 2 [Source:MGI Symbol;Acc:MGI:894687]	ATGGGAGTCCCGGCGTTCTTCCGCTGGCTCAGCCGCAAGTACCCGTCCATCATTGTCAACTGCGTGGAGGAGAAGCCAAAAGAATGCAACGGTGTAAAGATTCCAGTTGATGCCAGTAAACCTAATCCAAATGATGTGGAGTTTGATAATCTGTATTTGGATATGAATGGGATCATCCACCCCTGCACTCATCCTGAAGACAAACCAGCACCAAAAAATGAAGATGAAATGATGGTTGCAATTTTTGAGTACATTGACAGACTTTTCAATATTGTAAGACCAAGAAGACTTCTCTACATGGCAATAGATGGGGTGGCACCACGTGCAAAAATGAATCAGCAGCGTTCAAGGAGGTTCAGAGCATCAAAGGAAGGAATGGAAGCAGCAGTTGAGAAGCAG…
ENSMUSG00000030364	Clec2h	-0.10742476699891199	C-type lectin domain family 2, member h [Source:MGI Symbol;Acc:MGI:2136934]	ATGAATGCTGCAAAGGTTGAAACGAGTTCCATGGGCATGCTGCAGAGGGCAGACCTCACTGCTGCAGACTGCCTGCAGGAGGGAGAAATGGGTAAAAAAATCCAAGGAAAATGTTTCAGAATCATCTCCACTGTGTCTCCTGTTAAACTTTACTGCTGCTATGGAGTGATCATGGTCCTCACTGTAGCTGTAATTGCTCTTTCAGTTGCTTTGTCAGTGAGAAATAAAATCCCAGCCATGGAAGACCGTGAACCTTGCTACACCGCATGCCCAAGTGGCTGGATTGGATTTGGAAGTAAATGCTTTTATTTTTCTGAAGACATGGGAAACTGGACCTTCAGTCAGTCCTCCTGCGTAGCATCAAATTCCCATCTAGCACTGTTTCACAGCCTGGAGGAG…
ENSMUSG00000030278	Cidec	0.18870389233575693	cell death-inducing DFFA-like effector c [Source:MGI Symbol;Acc:MGI:95585]	ATGGAGTCCAACACAATCCAACTGACAAGGATGGACTACGCCATGAAGTCTCTCAGCCTCCTGTACCCCAGGTCGCTGTCCAGGCATGTGGCAGTGAGCACGGCAGTGGTGACCCAACAGCTGGTGTCTAAGCCCAGCCGGGAGACCCCGAGGGCCAGGCCCTGTCGTGTTAGCACCGCAGATCGGAAGGTTCGCAAAGGCATCATGGCTCACAGCTTGGAGGACCTCCTGAACAAGGTCCAGGACATCTTGAAACTTAAAGACAAGCCCTTCTCCCTGGTGCTGGAGGAAGATGGCACAATCGTGGAGACAGAAGAATACTTCCAAGCCCTGGCAAAAGATACCATGTTCATGGTCCTGCTGAAGGGGCAGAAGTGGAAGCCCCCATCAGAACAGCGC…
ENSMUSG00000035804	Ins1	0.19067008420397416	insulin I [Source:MGI Symbol;Acc:MGI:96572]	ATGGCCCTGTTGGTGCACTTCCTACCCCTGCTGGCCCTGCTTGCCCTCTGGGAGCCCAAACCCACCCAGGCTTTTGTCAAACAGCATCTTTGTGGTCCCCACCTGGTAGAGGCTCTCTACCTGGTGTGTGGGGAGCGTGGCTTCTTCTACACACCCAAGTCCCGCCGTGAAGTGGAGGACCCACAAGTGGAACAACTGGAGCTGGGAGGAAGCCCCGGGGACCTTCAGACCTTGGCGTTGGAGGTGGCCCGGCAGAAGCGTGGCATTGTGGATCAGTGCTGCACCAGCATCTGCTCCCTCTACCAGCTGGAGAACTACTGCAACTAA
ENSMUSG00000039208	Metrnl	-0.20882181552977305	meteorin, glial cell differentiation regulator-like [Source:MGI Symbol;Acc:MGI:2384806]	ATGCGGGGTGCGGTGTGGGCGGCCCGGAGGCGCGCGGGGCAGCAGTGGCCTCGGTCCCCGGGCCCTGGGCCGGGTCCGCCCCCGCCGCCACCGCTGCTGTTGCTGCTACTACTGCTGCTGGGCGGCGCGAGCGCTCAGTACTCCAGCGACCTGTGCAGCTGGAAGGGGAGTGGGCTCACCCGAGAGGCACGCAGCAAGGAGGTGGAGCAGGTGTACCTGCGCTGCTCCGCAGGCTCTGTGGAGTGGATGTACCCAACTGGGGCGCTCATTGTTAACCTACGGCCCAACACCTTCTCACCTGCCCAGAACTTGACTGTGTGCATCAAGCCTTTCAGGGACTCCTCTGGAGCCAATATTTATTTGGAAAAAACTGGAGAACTAAGACTGTTGGTGCGGGAC…
ENSMUSG00000027963	Extl2	0.141500684984481	exostosin-like glycosyltransferase 2 [Source:MGI Symbol;Acc:MGI:1889574]	ATGATGAGGGGTTGCCACATCTGCAAACTTCCGGGAAGAGTCATGGGGATTCGAGTGCTCCGGTTCTCCCTGGTGGTCATCCTTGTGTTGCTGCTGGTAGCGGGGGCTTTGACCAACTTACTCCCCAACATCAAAGAAGACAAGATGCTCACTCTGCGTAGGGAGATCAAATCCCCGAGCAAGTCGGCCCTGGATTCATTCACCCTCATCATGCAGACATACAACAGAACAGACCTCTTACTAAGACTCTTAAATCATTACCAGGCAGTACCGAGTCTGCACAAGGTGATCGTGGTGTGGAACAATGTGGGAGAGAAGGGCCCAGAGGAGTTGTGGAATTCTCTAGGGCCTCACCCGATCCCTGTCATCTTCAAACCACAAACAGCAAACAAAATGAGA…
ENSMUSG00000017740	Slc12a5	0.2831645743636848	solute carrier family 12, member 5 [Source:MGI Symbol;Acc:MGI:1862037]	ATGAGCCGCAGGTTCACGGTCACCTCGCTGCCCCCCGCAGCGTCCGCCGCCTCCGCTGACCCAGAGTCCCGCCGGCATTCGGTGGCCGATCCCCGCCGGCTCCCGAGGGAAGACGTCAAAGGTGATGGCAACCCCAAAGAGAGCAGTCCCTTCATCAACAGCACGGACACGGAGAAGGGCAGAGAGTACGATGGCAGGAACATGGCCCTGTTTGAGGAGGAGATGGACACCAGCCCCATGGTATCCTCCCTGCTCAGTGGGCTGGCCAACTACACCAACCTACCCCAGGGAAGTAGAGAGCATGAAGAAGCAGAAAATAATGAGGGTGGAAAAAAGAAGCCGGTGCAGGCTCCTCGAATGGGCACCTTCATGGGTGTGTACCTGCCGTGCCTGCAGAAC…
ENSMUSG00000033970	Rfc3	-0.23873753972225806	replication factor C (activator 1) 3 [Source:MGI Symbol;Acc:MGI:1916513]	ATGAGCCTCTGGGTGGACAAGTACCGGCCGAGCTCCCTTGCCCGGCTGGACTATCATAAGGAACAGGCAGCACAGCTGCGCAACCTGGTGCAGTGTGGAGACTTTCCTCACCTCTTAGTATATGGACCATCAGGTGCTGGAAAAAAGACAAGAATTATGTGTATTCTACGTGAACTTTATGGTATCGGGGTGGAAAAACTGAGAATTGAGCATCAGACTATCACAACCCCGTCTAAAAAAAAAATTGAAATCAGCACCATTGCAAGCAACTACCACCTTGAAGTTAATCCCAGTGATGCGGGGAACAGCGACCGAGTTGTAATTCAGGAGATGCTGAAGACAGTGGCCCAGTCACAACAACTTGAAACCAGCTCACAAAGAGACTTCAAAGTGGTATTA…
ENSMUSG00000004821	Tmed11	0.23915523789904672	transmembrane p24 trafficking protein 11 [Source:MGI Symbol;Acc:MGI:1914616]	ATGCAAATTCAGACAATTCTTTTATGTTTTAGCTTTTCATTTTCAGCTGCTTTTTATTTCCATGCTGGAGAGCGAGAGGAGAAATGTATAATTGAAGACATTCCAAGTGATACATTGATAACAGGGACATTCAAGGTACAGCAGTGGGACATAGTCAGACATGACTTCCTTGAATCTGCTCCTGGCTTAGGAATGTTTGTGACTGTTACAACTTACAATGATGAGGTATTATTATCCAAGTTATATGGTGCACAAGGAACATTCTATTTTACTTCTCATTCATCTGGTGAACACATCATTTGCTTAGAATCTAATTCTACACAGTTTGTGTCATTTGGAGGAAGTAAGCTGCGCATCCACTTAGATATTCGAGTTGGAGAACATGACCTTGATGCAGCT…
ENSMUSG00000021779	Thrb	-0.23753888975603274	thyroid hormone receptor beta [Source:MGI Symbol;Acc:MGI:98743]	ATGAACTACTGTATGCCAGAGGTACACGAAGTGTGCCCAGCTGCCAGCAGCAACTGCTACATGCAGGTCACTGACTACCTCGCATATCTGGAAGACAGTCCGGCTCTCAGTGGTCGTGATGTCCAAGCTGTGCCCAGTAGCAGCATATATATGGAACAGGCCTGGGCAGTGAATCAGCCTTATACCTGTAGTTACCCTGGAAACCTGTTTAAAAGCAAGGACTCTGACTTGGACATGGCCCTCAGTCAGTCCAGCCAGCCTGCACATCTCCCTGAAGAAAAGCCTTTTCCTCAAGTGCAGTCGCCACCGCACTCACAAAAAAAAGGGTATATCCCCAGCTATTTAGACAAAGATGAGCTCTGTGTAGTGTGTGGGGACAAAGCCACAGGGTACCACTAT…
ENSMUSG00000043639	Rbm20	-0.34145027161784547	RNA binding motif protein 20 [Source:MGI Symbol;Acc:MGI:1920963]	ATGGTGCTGGCAGTAGCCATGAGCCAGGACGCGGATCCCAGCGGTCCGGAGCAACCCGACAGAGATGCCTGCGTTATGCCCGGTGTTCAGGGGCCCTCCGTGCCCCAGGGCCAGCAAGGGATGCAGCCTCTGCCGCCACCGCCACCGCCTCAGCCTCAAGCCAGCCTGCCCCAGATCATCCAAAATGCTGCCAAGCTCCTGGATAAGAGCCCCTTCTCGGTCAATAACCAGAACCCTCTGCTCACGTCGCCAGCCAGCGTCCAGCTGGCCCAGATACAGGCTCAGCTCACCCTCCATCGGCTGAAGATGGCACAGACCGCAGTCACCAACAACACTGCAGCGGCCACGGTTCTGAACCAAGTCCTCTCCAAAGTGGCCATGTCCCAGCCTCTCTTCAAC…
ENSMUSG00000018909	Arrb1	0.330200769550012	arrestin, beta 1 [Source:MGI Symbol;Acc:MGI:99473]	ATGGGCGACAAAGGGACACGAGTGTTCAAGAAGGCAAGCCCCAATGGAAAGCTCACTGTCTACCTGGGAAAGCGGGACTTTGTGGACCACATTGACCTCGTGGACCCCGTGGATGGTGTGGTCCTGGTGGATCCTGAGTATCTCAAAGAAAGGCGAGTCTACGTGACACTGACCTGCGCCTTCCGGTATGGCCGGGAAGACCTGGATGTCTTGGGTCTGACTTTTCGGAAAGACCTGTTTGTGGCCAATGTGCAGTCCTTCCCACCGGCCCCCGAGGACAAGAAGCCACTGACACGGCTACAGGAGCGACTCATCAAGAAGCTGGGCGAGCATGCCTGCCCCTTCACCTTTGAGATCCCGCCAAACCTTCCATGCTCAGTCACTCTGCAGCCTGGGCCT…
ENSMUSG00000028070	Naxe	0.027584531603721454	NAD(P)HX epimerase [Source:MGI Symbol;Acc:MGI:2180167]	ATGTCCGGGCTGCGGACGCTGCTGGGGCTGGGGCTGCTGGTTGCGGGCTCGCGCCTGCCACGGGTCATCAGCCAGCAGAGTGTGTGTCGTGCAAGGCCCATCTGGTGGGGAACACAGCGCCGGGGCTCGGAGACCATGGCGGGCGCTGCGGTGAAGTACTTAAGTCAGGAGGAGGCTCAGGCCGTGGACCAAGAGCTTTTTAACGAGTATCAGTTCAGCGTGGATCAACTCATGGAGCTGGCCGGGTTGAGCTGTGCCACGGCTATTGCCAAGGCTTATCCCCCCACGTCTATGTCCAAGAGTCCCCCGACTGTCTTGGTCATCTGTGGCCCCGGAAATAACGGAGGGGATGGGCTGGTCTGTGCGCGACACCTCAAACTTTTTGGTTACCAGCCAACT…
ENSMUSG00000048782	Insc	-0.01376727426818167	INSC spindle orientation adaptor protein [Source:MGI Symbol;Acc:MGI:1917942]	ATGATGGCACTGCCTGGAGGCCGCCACCTGGATTCCGTTCCTCTGCAAGAGCAGAGGCTACACTTCATGCAGGTAGACTCGGTTCAGCGCTGGATGGAGGATCTGAAGCTCATGACCGAGTGTGAGTGCATGTGCGTCTTGCAGGCAAAGCCCATCAGCCTGGAGGAAGACACGCAAGGTGACCTTATCCTAGCAGGTGGTCCTGGTCCAGGAGATCCTCTACAGCTGCTCTTGAAACGGGGCTGGGTCATCAGCACCGAGCTTCGAAGGATCGGGCAGAAGCTGGCCCAGGACCGCTGGGCCCGTGTGCACAGCATGAGTGTGCGTCTGACGTGCCATGCACGCTCCATGGTCAGCGAGTACAGCACCATCAGCAGGACAGCCTCACAGGAAATGGGC…
ENSMUSG00000022723	Crybg3	-0.6265734415417302	beta-gamma crystallin domain containing 3 [Source:MGI Symbol;Acc:MGI:2676311]	ATGTCCGGCGGCCGCAGGAGGGGCAGCGCCCCCTGGCACAGCTTCTCTCGGTTCTTCGCTCCGCGGAACCCTTCTCGGGACAAGGAAGAGGAAGAGGAGGAGAAGCCGGGGACCGGCCAGCCGGCGGGAGTGAGCCGGAGTGCAGCCAGTGTTGAAAATGAGCCCGTGAGTACAAGTCAGAAAAAGGAAAATGCGCTTTCATCAGAAGCAGTGAAGATTCCCCAAGCGGAGGACAGAAGGAACCATGCTGAACAGCCGGCCATCCTCCCCATGGTGGACGATCTCCCAAAGCCAAAGGACCTTCCGGATTCCACCCCAGAGGCCAAAACAGGAGAGAGCGACCGGCAGCCAAAAGAAAGCTTTTTTCAGTTCCTCGGGAACTTATTCAACATCTCGGGA…
ENSMUSG00000010064	Slc38a3	0.27750316368474715	solute carrier family 38, member 3 [Source:MGI Symbol;Acc:MGI:1923507]	ATGGAGATACCCCGACAGACAGAGATGGTGGAGCTGGTGCCCAATGGCAAACACTTGGAGGGGCTTCTACCAGTGGGCGTGCCTACAACAGACACCCAGAGGACTGAAGACACCCAACACTGTGGAGAGGGCAAGGGCTTCCTTCAGAAGAGTCCCAGCAAGGAGCCACACTTCACCGATTTCGAGGGGAAGACATCATTTGGGATGTCAGTGTTCAATCTCAGCAACGCCATCATGGGCAGTGGAATTCTGGGGCTCGCCTACGCCATGGCCAATACGGGCATCATCCTTTTCCTGTTCCTGCTTACAGCGGTCGCCCTGTTGTCTAGCTATTCCATCCACCTGCTCCTCAAGTCTTCGGGGATTGTGGGCATCCGTGCCTACGAGCAGTTGGGCTAC…
ENSMUSG00000059995	Atxn7l3	-0.15625631495224254	ataxin 7-like 3 [Source:MGI Symbol;Acc:MGI:3036270]	ATGAAAATGGAGGAAATGTCTTTGTCTGGCCTGGATAACAGCAAACTAGAGGCCATCGCTCAGGAGATATATGCTGACCTGGTCGAGGATTCTTGTTTGGGATTCTGCTTTGAAGTACACCGGGCTGTTAAGTGTGGCTACTTCTTCCTGGATGATACGGATCCTGACAGCATGAAGGATTTTGAGATCGTGGACCAGCCTGGGTTGGACATCTTTGGACAGGTTTTCAACCAGTGGAAGAGCAAGGAGTGTGTTTGCCCCAATTGCAGCCGCAGTATTGCTGCTTCCCGCTTTGCCCCCCACCTGGAGAAGTGCCTGGGAATGGGTCGCAACAGCAGCCGAATCGCCAACCGTCGGATTGCCAATAGCAACAATATGAACAAGTCTGAGAGTGACCAA…
ENSMUSG00000090961	Vmn2r8	-0.22782237073654396	vomeronasal 2, receptor 8 [Source:MGI Symbol;Acc:MGI:3642986]	ATGAAGAAGCTGCGTACTTTCACTATTTCCTTTTTGCTCCTGAAGTTTTCTCTCATCTTATGCCATGTAACTGATCCCATTTGCTTTTGGAGGATAAAGAATAATGAAGAAAATGATGGAGATTTGAGAAGTGACTGTAATTTTCTCCTTTGGACAGACTATGAAAGTACTGAATTCAATTTTTATAATATTGTTGATTTTAGAATACCTGCAAGAAGATATGAGTATTTTCTGGTATTGTTTTTTGCTACTGATGAAATCAACAAGAATCCTGATCTTTTACCCAACATGTCTTTGATAGTCTGGCTTCTTAGTGGTCAGTGTGGAGATGAATGGTCAGTTCTACATAAAAATTATTCACAAGAAAATATTAATGTGAAATTTATTAATTATGACTGT…
ENSMUSG00000072049	Vmn2r121	-0.2497882468857445	vomeronasal 2, receptor 121 [Source:MGI Symbol;Acc:MGI:3643045]	ATGAAGAAGCTCTGTGCTTTCACTATTTCATTTTTGTTTCTGAAGTTTTCTCTCATCTTGTGCTGTCTGAGTGAACCAAGTTGCTTTTGGAGGATAAGGAATAGTGAAGATAGTGATGGAGATTTGCAAAGGGAATGTCATTTTTACCTTTGGTTAATTGATGAATCTATTGAAGATAATTTTGTTTCAGATTTAAATTTTCGAATTGCAGCAAGTGAATATGAGCTTCTTCTGGTAATCTTTTTTGCTACTGATGAAATCAACAAGAATTCTTATCTTTTACCCAACATGACTTTGATGTTCTCCATCATTGGTGGAAACTGTCATGATTTATTGAGAAGTCTGGATCAAGAATATACAGAAATAAAAGGACATATGAATTTTGTTAATTATTTCTGT…
ENSMUSG00000031949	Adat1	-0.13615697814295133	adenosine deaminase, tRNA-specific 1 [Source:MGI Symbol;Acc:MGI:1353631]	ATGTGGACCGCGGATGAGATCGCTCAGCTGTGCTATGCACACTATAACGTCAGACTGCCCAAGCAGGGGAAGCCTGAGCCAAATCGTGAGTGGACCTTGCTGGCAGCTGTGGTGAAGATTCAGGCTTCAGCTAACCAAGCTTGTGACATCCCTGAGAAGGAAGTGCAAGTGACAAAGGAAGTTGTCTCAATGGGAACAGGAACAAAATGCATAGGCCAGTCCAAGATGCGAGAGAGCGGGGACATCCTCAATGACAGCCATGCTGAGATCATAGCCAGAAGGAGTTTCCAGAGATACCTTCTCCATCAGCTCCATTTGGCAGCCGTCCTGAAAGAGGATAGCATCTTTGTTCCAGGGACCCAAAGAGGACTGTGGAGGCTCAGACCTGACCTGTCGTTT…
ENSMUSG00000027381	Bcl2l11	-0.2928653971043854	BCL2-like 11 (apoptosis facilitator) [Source:MGI Symbol;Acc:MGI:1197519]	ATGGCCAAGCAACCTTCTGATGTAAGTTCTGAGTGTGACAGAGAAGGTGGACAATTGCAGCCTGCTGAGAGGCCTCCCCAGCTCAGGCCTGGGGCCCCTACCTCCCTACAGACAGAACCGCAAGGTAATCCCGACGGCGAAGGGGACCGCTGCCCCCACGGCAGCCCTCAGGGCCCGCTGGCCCCACCGGCCAGCCCTGGCCCTTTTGCTACCAGATCCCCACTTTTCATCTTTGTGAGAAGATCTTCTCTGCTGTCCCGGTCCTCCAGTGGGTATTTCTCTTTTGACACAGACAGGAGCCCGGCACCCATGAGTTGTGACAAGTCAACACAAACCCCAAGTCCTCCTTGCCAGGCCTTCAACCACTATCTCAGTGCAATGGCTTCCATACGACAGTCT…
ENSMUSG00000046062	Ppp1r15b	-0.7137549876491588	protein phosphatase 1, regulatory subunit 15B [Source:MGI Symbol;Acc:MGI:2444211]	ATGGAGACAGGAACGCACAGGGCCCGGAAGCGGCCTGGCCCTCGGCTGGGCTCCTGGTTCCGGCTGCCCTTCCTTCGGCGATCGCACGCCTGCTCTTCGGAGTTCCCGCCGCCTTCCTCTCGACAAAATCCCGGGAACTCCGCTCTGCCCGAGCGTCGGACCAGGTACTGGACCAAATTGCTTTCTCAGCTCCTTGCCCTGCTCCCTAGCCTATTCCAGAAGCTGCTGCTTTGGAGCCAGCTTTTCGGGGGCCTGATTCCTACCAGATGGCTAGATTTTGCCGCAAGTTACAGCGCCCTGAGAGCTTTGAGAGGACGGGAGGAATCTGCCGCTCCCACGGTGCAGAAGTCTCTGAGTTCACTGCGGCTGGACTCTTCGGAAGACTTGGTTGTCAGTTCT…
ENSMUSG00000027300	Ubox5	-0.5819513244410909	U box domain containing 5 [Source:MGI Symbol;Acc:MGI:2154658]	ATGTCAGCCGCTCTCAAGCTATTAGAACCTTTAAAGTACAAAGCACCTTGTAATCCTGCTTACCGTGCAGCCCAAAGCGTGGCCCATTGGCACATGGGAAACATCACGCCACACGGGGGACAGACGCTCCCTGAATGTAATAGCTCCTGCCATCTTGCCAGAAAAGTGAAGAACGTTGGTGGTACCACCCTTCCTCGGAGAACCTTCACAGCCAGCAGTGCCCACCTGGGTTTGGAGTTCAACAAAGCTTCTACCCTTAATGCCAGCACACTGCATCCAGACTCATCCAGTGCTGGAGGAGGTGAAGAGGATGTAGAGGTCTTTGATTCCTTCGAAGGAACCCGAGTTTTCTTAAAGCTAAGGCCAGAGTACCAGCTTCACAGCTATAACAGAAGTGAC…
ENSMUSG00000051050	Spink14	0.497221364743886	serine peptidase inhibitor, Kazal type 14 [Source:MGI Symbol;Acc:MGI:3646952]	ATGGTCAAATATTTCCAGTGCTCAGTTTTGTTCTCCATTATGCTCCACTTGGTTATCCTGGCTGCTCCAGGTGCTCGAGTTTGGTGGCCTACACATGGACTTATTAAGATCAAATGTCCTTATAAGAAAGTAAATTTGAGTTGGTTCAACAAAACAGTGGACCCCTGCCCTGACCTAAAACAACCCATCTGCGGCACCAATTTTGTAACCTATGATAATCCCTGCATCTTGTGTGTTGAGAGCTTGAAATCTGGGGGAAGAATTAGATATTACTACAATGGAAGGTGCTAG
ENSMUSG00000060560	Ces4a	0.33423048896752827	carboxylesterase 4A [Source:MGI Symbol;Acc:MGI:2384581]	ATGGCAGAAGCTGGCTGGAACATGAAGTGGATTCTGGGCTTGAGCCTCACCCTGTGCCTGGTAGTCCAGACAGCCTTAGGTGCTTTGCACACCAAGGAACCTCTCCTGATCACCAAACACGGGATCCTCCAAGGAAAGCAAGTGCATGTGGGAGACACACCCATCCAAGTCTTCCTGGGGATCCCCTTCTCTAAACCTCCGGTGGGCACCCGCAGGTTTGCTCCTCCAGAGCCCCCGCTACCCTGGAACGGCATCAGAGATGCCACCACCTACCCACCTTCGTGCCTTCAGGAATCCTGGGGACAGATATTATCCATGTACCTTAACACTCGGAAACAGTATAAATGGCTGCATTTCAGTGAGGACTGCCTCTACCTGAATGTGTATGCCCCAGTACTC…
ENSMUSG00000027474	Ccm2l	-0.24063482686484203	cerebral cavernous malformation 2-like [Source:MGI Symbol;Acc:MGI:2385159]	ATGGAATATGAAGCCAAGAAAGGGAAGAAGGGCTTTGTGTCCCCCATCCGAAGACTGGTGTTCCCGAAGGCTGCACGCCAGGCTGCCTTCAGAAGCAGTGTCAGTCGCAGGCCCCTGCACTCTATGCCTCTTTATCCCCCTGACTACCTCATCGACCCCCACATCCTGCTGTGTGACTACCTGGAGAAAGAGGTCAAGTTCCTGGGTCACCTCACCTGGGTGACTTCCTCACTGAACCCCTCCAGCCGAGACGAGCTCCTGCAGCTTCTGGACACTGCCAGGCAGCTGAAGGAGTTGCCTCTGAAGACCACGCCAGAGCAGGACAGCATCCTGAGCCTGTCCGCACGCTGCCTGCTGCTCACCTGGCGCGACAATGAGGAGCTCATCCTGCGCATCCCG…
ENSMUSG00000025027	Xpnpep1	0.18022977321046188	X-prolyl aminopeptidase (aminopeptidase P) 1, soluble [Source:MGI Symbol;Acc:MGI:2180003]	ATGGCAGCCTCCAGAAAGCCGCCGCGAGTAAGGGCGAATCGCCAGGACTTTCAGCTGAGAAATTTAAGAATAATTGAACCTAACGAGGTGACACCCTCAGGAGACAAGAGTGTGGAAACAGACCACAGGATGGCTCCGAAGGTGACTTCAGAACTGCTTCGGCAGCTGCGACAAGCTATGAGGAACTCCGAATACGTGGCAGAACCCATCCAGGCCTATATCATCCCGTCAGGAGATGCCCACCAGAGCGAGTACATTGCACCCTGTGACTGTCGGAGGGCGTTTGTCTCTGGATTCGATGGCTCTGCAGGCACAGCCATCATCACGGAGGAGCATGCGGCCATGTGGACTGACGGGCGCTACTTCCTCCAGGCTGCCAAACAGATGGACAACAACTGG…
ENSMUSG00000046856	Gpr1	-0.13036634100893627	G protein-coupled receptor 1 [Source:MGI Symbol;Acc:MGI:2385324]	ATGGAAGTCTCAAAGGAAATGTTATTTGAGGAGTTGGACAACTATTCCTATGCCTTAGATTATTACTCCCAGGAGTCTGACCCGGAGGAGAAGGTGTACCTGGGACTCGTTCACTGGATCTCCCTGTTCTTATATGCCCTAGCATTTGTTCTGGGCATCCCAGGAAATGCCATCGTCATTTGGCTCATGGGATTCAAGTGGAAGAAGACAGTCACCACTCTTTGGTTCCTCAATCTGGCCATCGCAGACTTCATCTTTGTTCTCTTCCTGCCCCTGTACATTTCCTACGTGGCCTTGAGTTTCCACTGGCCCTTTGGCCTGTGGCTCTGCAAGGTTAATTCCTTCATTGCCCAACTGAACATGTTTTCCAGTGTTTTCTTCTTGACAGTGATCAGCCTG…
ENSMUSG00000029229	Chic2	-0.5337824515716013	cysteine-rich hydrophobic domain 2 [Source:MGI Symbol;Acc:MGI:1921527]	ATGGCGGATTTCGATGAAATCTACGAGGAGGAGGAGGACGAGGAGCGGGCCCTGGAGGAGCAGCTGCTCAAGTACTCGCCCGACCCGGTGGTGGTCCGCGGCTCCGGTCACGTCACCGTATTTGGACTGAGCAACAAATTTGAATCAGAATTCCCTTCTTCATTAACTGGAAAAGTAGCTCCTGAAGAATTTAAAGCCAGCATCAACAGAGTTAACAGCTGTCTCAGGAAGAATCTTCCTGTTAATGTGCGGTGGTTGCTTTGTGGCTGCCTGTGCTGCTGCTGCACGTTAGGGTGCAGTATGTGGCCAGTTATTTGCCTCAGTAAAAGAACACGAAGATCGATTGAGAAGTTATTAGAATGGGAAAACAATAGGTTATACCACAAGCTGTGCTTGCAC…
ENSMUSG00000016255	Tubb1	0.1790965237949507	tubulin, beta 1 class VI [Source:MGI Symbol;Acc:MGI:107814]	ATGAGAGAGATCGTGCACATCCAGATTGGCCAGTGTGGCAACCAGATCGGAGCCAAGTTCTGGGAGGTGATCGGGGAAGAACATGGGATTGACTGCGCTGGGAGCTACTGTGGGACGTCTGCTCTCCAGCTGGAGAGGATCAGCGTTTACTACAACGAAGCCTACGGTAAGAAGTATGTGCCGCGAGCCGTCCTTGTGGACCTGGAACCCGGGACAATGGACAGCATCCGATCCAGCAGATTGGGAGTCCTCTTTCAGCCTGACAGTTTTGTTCATGGTAACTCTGGTGCTGGTAACAACTGGGCGAAGGGCCACTACACAGAGGGAGCGGAGCTGATCGAAAATGTCATGGATGTGGTAAGGAGGGAGAGCGAGAGCTGCGACTGCCTACAGGGTTTC…
ENSMUSG00000033790	Tubgcp5	-0.4782806895279553	tubulin, gamma complex associated protein 5 [Source:MGI Symbol;Acc:MGI:2178836]	ATGGCCCGGCCTAAGTCGTCCGGGAGCCGGATGGACAGACAGCTGGAGCATGATGTGTGCGAGCTCGTCCGGCAGGTTACGGGGCTGCAGGACGAGGCGGACCCCAACTTCCAGCTGGCCCTGGACTTCGTCTGGTCCAACTTCAGATTTCATCGTTTCTTGGATGTCAACAGTCACAAAGTAGAAAAAACAATAGAAGGAATTTATGAAAAATTCACCATTCATTCTGATCTCAACAAAGCTGCTAGTTGGAAGAGATTAACTAAGGAGTTCCTAAATGCATCTCTTCCCAGCACAGAGAAAATAAAGACAGATGCACATTATTCCATACTGTCACTCCTTCTGTGTCTGTCTGATTCTCCTTCAAACAGCAATTATGTGGAAACACCGAGAGAGAAA…
ENSMUSG00000032293	Ireb2	-0.07278132510964283	iron responsive element binding protein 2 [Source:MGI Symbol;Acc:MGI:1928268]	ATGGACTCCCCAAGTGCAGGATACACCTTTGAGTACCTTATTGAAACATTAAATGGCAATTCACAGAAGAAGTTCTTCAATGTACCTAAACTTGGCGGCACCAAGTATGATATTCTGCCTTACTCAATACGGGTCCTATTGGAAGCTGCTGTACGAAATTGTGATGGCTTTTTAATGAAAAAGGAAGATGTTATGAACATTTTGGACTGGAAAACCAAACAGAGCAATGTTGAAGTGCCCTTTTTCCCTGCCCGTGTTGTTCTTCAAGATTTCACTGGAATACCGGCAATGGTGGATTTTGCTGCTATGAGGGAGGCAGTGAAAACTCTTGGAGGTGATCCTAAGAAAGTCCACCCTGCCTGTCCGACAGATCTCACAGTGGACCACTCTTTACAGATT…
ENSMUSG00000023033	Scn8a	0.10809960582616221	sodium channel, voltage-gated, type VIII, alpha [Source:MGI Symbol;Acc:MGI:103169]	ATGGCAGCGCGGCTGCTCGCACCACCAGGCCCCGACAGTTTCAAGCCTTTCACCCCCGAGTCGCTGGCAAACATCGAGAGGCGCATCGCCGAGAGCAAGCTCAAGAAACCACCCAAGGCGGATGGCAGCCACCGGGAGGACGATGAAGACAGCAAGCCCAAGCCAAACAGTGACCTGGAGGCGGGGAAGAGTTTGCCTTTCATCTACGGGGACATCCCGCAAGGCCTGGTTGCGGTTCCCCTGGAGGACTTTGACCCGTACTATTTGACGCAGAAAACTTTTGTAGTATTAAACAGAGGGAAAACTCTCTTCAGATTTAGCGCCACTCCTGCCTTGTACATTCTAAGTCCTTTTAACCTGATAAGAAGAATAGCTATTAAAATTTTGATACATTCAGTC…
ENSMUSG00000039512	Uhrf1bp1	-0.32328623654320066	UHRF1 (ICBP90) binding protein 1 [Source:MGI Symbol;Acc:MGI:3041238]	ATGGCCGGGATCATTAAGAAGCAGATCTTGAAGCATCTGTCCCGGTTCACTAAGAATCTTTCCCCGGACAAAATCAACTTGAGCACTCTGAAAGGGGAGGGTCAGCTGACCCATCTGGAGCTGGACGAAGAGGTTCTGCAGAATGTTCTGGAATTGCCTACCTGGCTGGCCATCACTAGGGTCTACTGCAATCGGGCCTCCATCCAGATCCAGTGGACCAAGTTGAAGACACACCCGATCTGCTTGTGTCTGGATAAGGTGGAGGTGGAGATGCAGACCTGTGAGGACCCTCGCCCCCCCAACGGGCAGTCTCCTATCGCCCTTGCCTCGGGACAGAGTGAGTATGGCTTTGCTGAGAAGGTGGTGGAGGGAATGTTCATTGTGGTCAACTCCATCACC…
ENSMUSG00000016252	Atp5e	1.2719072590943217	ATP synthase, H+ transporting, mitochondrial F1 complex, epsilon subunit [Source:MGI Symbol;Acc:MGI:1855697]	ATGGTGGCGTACTGGCGACAGGCTGGACTCAGCTACATCCGGTTTTCCCAGATCTGTGCAAAAGCAGTGAGGGATGCCCTGAAGACCGAGTTCAAAGCGAACGCTGAGAAGACTTCGGGCAGCAGCATAAAAATTGTGAAAGTCTCGAAGAAGGAGTAG
ENSMUSG00000025509	Pnpla2	0.10817337200026592	patatin-like phospholipase domain containing 2 [Source:MGI Symbol;Acc:MGI:1914103]	ATGTTCCCGAGGGAGACCAAGTGGAACATCTCATTCGCTGGCTGCGGCTTCCTCGGGGTCTACCACATTGGCGTGGCCTCCTGCCTCCGTGAGCACGCGCCCTTCCTGGTGGCCAACGCCACTCACATCTACGGAGCCTCGGCAGGGGCGCTCACCGCCACAGCGCTGGTCACTGGGGCCTGCCTGGGTGAAGCAGGTGCCAACATTATTGAGGTGTCCAAGGAGGCCCGGAAGCGGTTCCTGGGTCCTCTGCATCCCTCCTTCAACCTGGTGAAGACCATCCGTGGCTGTCTACTAAAGACCCTGCCTGCTGATTGCCATGAGCGCGCCAATGGACGCCTGGGCATCTCCCTGACTCGTGTTTCAGACGGAGAGAACGTCATCATATCCCACTTTAGC…
ENSMUSG00000027219	Slc28a2	0.40790679355655735	solute carrier family 28 (sodium-coupled nucleoside transporter), member 2 [Source:MGI Symbol;Acc:MGI:1913105]	ATGGAGAAGTCAAAGGGAAGAAAGTCTGTTTCCCAGGCCACAGTGGAGAATTGCATGGAGAACCCAGGCCTGGAACTCATGGAAGGCGGAAATCTTGAGCAAAGATACACACAGGAGGAAGTGACACAGGGACACAGCCTGGAGGATGGCTTGGGGCATTCCTCTCTCTGGAGCAGGAGGATTTTTCAGCCTTTCACGAAGGCGAGAAGTTTCTTTGAAAGACATGCTGGTTTATTCAGAAAGATCCTGCTTGGTCTCTTGTGTTTAGCTTATGCTGCCTACTTCCTGGCAGCGTGCATCCTGAACTTCCAGAGGGCACTGGCCTTGTTTGTCATCACCTGTCTTGTGATCTTCATCCTGGCTTGCCATTTTCTGAAAAAATTCTTTCCTAAAGAACAA…
ENSMUSG00000028640	Tfap2c	-0.8856614966126556	transcription factor AP-2, gamma [Source:MGI Symbol;Acc:MGI:106032]	ATGATCCTTGGGGCGGGGAAACGCGCCCTTCGTCGGCGTTGCGCATTATCCGCGCTATTTGCGCGCCGCAGCGACATGGGAGGAGGGTTGTTGAACGAGGGCGCTGTGCGCCGAGGTCGCCGCACGCCGAACCCCTGGGGCACGGGTAACCGGACTGTGGCGCGGAACGCGCTCTTGGCACCTCCAAGCGACGCAGCGCGGGAACCTTCGCCAGAGGGCTCGAAGGATTCGTCCCCTCAGGATCGCCACGACTCGAGCAGTAATGGCAACCCTCGCATCCCTCACCTCTCCTCTCCGGGACAACATCTCTACAGTCCCGCGCCGCCTCTCTCGCACACCGGGGTTGCAGAGTACCAGCCGCCTCCTTACTTCCCGCCGCCTTACCAGCAGCTGGCATAC…
ENSMUSG00000022724	Riox2	-0.03554575223977627	ribosomal oxygenase 2 [Source:MGI Symbol;Acc:MGI:1914264]	ATGCCAAAGAAAGTGCAGCCCACAGGGGATGAGAACGAAGAAGCGTCTGTTCCTTGCAAGCGGGTGAAGGAGGAGCTGCCTGAAACGCTTTCTGTATTAAACTTTGACAGCCCCAGTAGTTTCTTCGAAAGTTTAATCTCACCCATCAAAGTAGAGACTTTTTTCAAGGAATTCTGGGAACAAAAGCCCCTTCTCATCCAGAGGGATGACCCTGTACTGGCCAAATATTACCAGTCTCTGTTCAGCCTCTCAGATCTGAAGAGACTCTGCAAGAAAGGAGTGTACTATGGAAGAGACGTGAATGTCTGCCGGAGCATCAGTGGGAAGAAGAAGGTTTTAAATAAGGACGGCAGAGCACATTTTCTTCAGCTGAGAAAAGATTTTGATCAGAAGAGGGCA…
ENSMUSG00000079299	Klrb1	-0.3439010063648572	killer cell lectin-like receptor subfamily B member 1 [Source:MGI Symbol;Acc:MGI:96877]	ATGGATGCACCAGTGCTCTATGCTGAATTAAATTTAGCCGAGACCAGAGGGCTCAGGTGTACATCAGCTCCATCTCTCCCCCAAGATGCCTGTCAGGGACCAGGCTGGCATCGGGTGGCTCTGAAACTCGGCTGTGCTGGGCTGATCTTTCTTCTGATGGTACTCAGTGTCTTAGTGGGATTCTTGGTGCAAAAACCTCTAATAGAAAAATGCAGTGTGGCTGTTCAAGAAAACAGGACTGAACCAACAGGGAGATCAGCCACACTAGAGTGCCCGAGAGACTGGCATCCACACTGTGATAAATGCTTATTTACTTCTCAAACTTCCAGACCTTGGGCTGACGGTCTGGTTGACTGTAATTTGAAAGGAGCCACTTTGCTGCTCATTCAAGATGAAGAA…
ENSMUSG00000079043	Fastkd5	-0.6373216790338717	FAST kinase domains 5 [Source:MGI Symbol;Acc:MGI:2139469]	ATGGCTCTTGTGGTATGCCGAAGATTTACAGGCAGTTTCTGTGGAACATTTCCCTGTCCACCTCTAATGAAGCCCCGTCAAACAAGAACATGTGATTTTGCTCTGACTGCCAAGAAGATCAGCACAGACTCCAGAATGTCAGCCGCTCTCAAGCTATTAGAACCTTTAAAGTACAAAGCACCTTGTAATCCTGCTTACCGTGCAGCCCAAAGCGTGGCCCATTGGCACATGGGAAACATCACGCCACACGGGGGACAGACGCTCCCTGAATGTAATAGCTCCTGCCATCTTGCCAGAAAAGTGAAGAACGTTGGTGGTACCACCCTTCCTCGGAGAACCTTCACAGCCAGCAGTGCCCACCTGGGTTTGGAGTTCAACAAAGCTTCTACCCTTAATGCC…
ENSMUSG00000027478	Dnmt3b	0.003704026497357484	DNA methyltransferase 3B [Source:MGI Symbol;Acc:MGI:1261819]	ATGAAGGGAGACAGCAGACATCTGAATGAAGAAGAGGGTGCCAGCGGGTATGAGGAGTGCATTATCGTTAATGGGAACTTCAGTGACCAGTCCTCAGACACGAAGGATGCTCCCTCACCCCCAGTCTTGGAGGCAATCTGCACAGAGCCAGTCTGCACACCAGAGACCAGAGGCCGCAGGTCAAGCTCCCGGCTGTCTAAGAGGGAGGTCTCCAGCCTTCTGAATTACACGCAGGACATGACAGGAGATGGAGACAGAGATGATGAAGTAGATGATGGGAATGGCTCTGATATTCTAATGCCAAAGCTCACCCGTGAGACCAAGGACACCAGGACGCGCTCTGAAAGCCCGGCTGTCCGAACCCGACATAGCAATGGGACCTCCAGCTTGGAGAGGCAA…
ENSMUSG00000025902	Sox17	-0.6320286717248792	SRY (sex determining region Y)-box 17 [Source:MGI Symbol;Acc:MGI:107543]	ATGAGCAGCCCGGATGCGGGATACGCCAGTGACGACCAGAGCCAGCCCCGGAGCGCGCAGCCCGCGGTGATGGCAGGGTTGGGCCCCTGTCCCTGGGCCGAGTCCCTGAGCCCCCTCGGGGATGTAAAGGTGAAAGGCGAGGTGGTGGCGAGTAGCGGGGCGCCAGCCGGGACGTCGGGCCGAGCCAAAGCGGAGTCTCGCATCCGGCGGCCGATGAACGCCTTTATGGTGTGGGCCAAAGACGAACGCAAGCGGTTGGCACAGCAGAACCCAGATCTGCACAACGCAGAGCTAAGCAAGATGCTAGGCAAGTCTTGGAAGGCGTTGACCTTGGCAGAGAAGCGGCCCTTCGTGGAAGAGGCCGAGCGGCTGCGCGTGCAGCATATGCAGGACCACCCC…
ENSMUSG00000022586	Ly6i	0.5243392540762365	lymphocyte antigen 6 complex, locus I [Source:MGI Symbol;Acc:MGI:1888480]	ATGGACACTTCTCACGCGATAAAGTCCTGTGTGCTGATCCTTCTTGTGACCCTACTGTGTGCAGAAAGAGCTCAGGGACTGGAGTGTTACCAGTGCTATGGAGTCCCATTTGAGACTTCTTGCCCATCATTTACCTGCCCCTACCCTGATGGATTCTGTGTTGCTCAGGAGGAAGAATTTATTGCAAACTCTCAAAGAAAGAAAGTAAAGAGCCGTTCTTGCCATCCTTTCTGCCCTGATGAAATTGAAAAGAAGTTTATCCTGGATCCTAACACCAAGATGAATATTTCCTGTTGCCAGGAAGACCTCTGCAATGCAGCAGTTCCCACTGGAGGCAGCTCCTGGACCACGGCAGGGGTGCTTCTGTTCAGCCTGGGCTCAGTCCTCCTGCAGACCCTG…
ENSMUSG00000029134	Plb1	-0.02161702217618453	phospholipase B1 [Source:MGI Symbol;Acc:MGI:1922406]	ATGGAGCTGTACCCAGGTGTGTCCCCGGTGGGACTGCTGCTGCTGCTACTGCTGGGACAAGGGCCCTCCCAAATCCATGGCTCTTCTGGAGAGAACACATTGGCATGGCAGTCCCAGCAAGTGTTTTGGACCCTGAAGAATTTTCCATTCCCTTGCAAGCCAAAGAAGTTAGAATTGAGTGTGCTTTCTGAGTCAGTTCACTCTCTGAGACCCTCAGACATTAAACTCGTGGCAGCCATCGGCAACCCAGAAATTCCTCTAGCCCCTGGGTCTGGCACGATCAACATGGAGAAACCTCAAAGCATCAAGAACCAACCACAGGATGTATGCATGGGAATCATGACAGTTCTTTCAGATATCATCAGACATTTCAGTCCTTCTGTCCTGATGCCCACGTGT…
ENSMUSG00000091624	Vmn2r9	-0.23044486385480942	vomeronasal 2, receptor 9 [Source:MGI Symbol;Acc:MGI:3643093]	ATGAAGAAGCTGCGTACTTTCACTATTTCCTTTTGGCTCCTGAAGTTTTCTCTCATCTTCTGCCATGTAACTGAACCCATTTGCTTTTGGAGGATAAAGAATAATGAAGAAAATGATGGAGATTTGAGAAGCGACTGTAATTTTTTCCTTTGGACATACGATGAAAGTACAGAAATCAATTTTTATAATATTGTTGATTTTAGAATACCTGCAAGAAGATATGAGTTCTTTCTGGTATTGTTTTTTGCTACTGATGAAATCAACAAGAATCCTGATCTTTTACCCAACATGTCTTTGATAGTCTGGCTTCTTGGTGGTCAGTGTGGAGATGAATGGTCAGTTCTATATAAAAATTATTCACAAGAAAATATTAATGTGGAATTTATTAATTATGACTGT…
ENSMUSG00000005493	Msh4	-0.6267550194929944	mutS homolog 4 [Source:MGI Symbol;Acc:MGI:1860077]	ATGTGCTGCTTGTTCCTGCGCCTGCGCGATTACAGCACTGCGCATGCGCTTAGCCTCCCGCCTTGTCAGCGGTGCGGCCTCCAGCCTTGGAGTGCTCGAAGCCACGCGCGCAGAACCTTGGGAGTCAGAAAGGCCGGAGAGATGCTGAGGCAGGAGGCTGCATCGCTTTCCAGTTCCCCACGCTGGACGCCGTCGCGGAGGGATGCCCCATGCGGGAGGACCCTGGCCTCCGCGTCCAGGCCGAGTACGGAAGGCGCCATGGCCGACAGGAGCAGCAGCAGCAGCAGCAGTCCGGCGCCGGCGTCCGCGCCAGGTTCATCATTTGGAAACAAAAGATCTTATGCTATACACAGAGCTGCATCCAGTTTTCCTGTTGGTACAAGCTCATCTTCTGCACGA…
ENSMUSG00000032013	Trim29	-0.2438263910237853	tripartite motif-containing 29 [Source:MGI Symbol;Acc:MGI:1919419]	ATGGAAGGTGCCGATGCCTGCAGGAGCAATGGGGCCAGCCCGGAAGCCAGGGACACCCGCAGCCCACCGGGTCCCAGCGGCAGCCTAGAGAATGGCACTAAAGCAGACAGTAAGGACACCAAGACAACCAACGGGCACAGTGGGGAGGTGACAGAGGGCAAGACCCTGGGCAGTGCCCTGAAGTCAGGGGAGGGGAAGAGTGGCCTATTTTCCAGCAATGAGTGGCGCAGGCCTATCATCCAGTTTGTGGAGTCTGTCGACGACAAAGGCTCCAGTTACTTCAGTATGGACTCTGCGGAAGGCAGGAGGTCCCCTTATGCGGGGCTCCAGTTGGGGGCTTCCAAGAAACCTCCTGTGACCTTTGCTGAGAAGGGGGAGCTGCGAAAGTCCATTTTCTCC…
ENSMUSG00000037703	Lzts3	-0.43207878765014296	leucine zipper, putative tumor suppressor family member 3 [Source:MGI Symbol;Acc:MGI:2656976]	ATGGCCCCTGCAGACCTGGCCTCGGAGGGTCCCAAGCTTGAGGACCCGCCGGCCCCCCACCTCTTTGGAAAGTGCCCTTCTGGCTTAATCATGGCGAAGCTGGAGACGTTACCTGTGCGCGCTGATCCAGGGAGGGATCCTCTCCTGGCCTTTGCCCCCCGGCCTTCTGAGCTTGGACCCCCAGATCCCCGCCTGACTATGGGCAGTGTGGGTAGTGGGGTGACCCATGCTCAGGAGTTTCCTATGAAAAGCGTGGGCACTCGAACAGGGGGTGGGGGCAACCAAGGCAGTTTCCCTGGTCCAAGAAGCGGTGGTAGCGGGGCCAACAGGGAGAGACCTGGTCGCTACCCATCAGAGGACAAGGTTCTCGCCAACTCTCTCTACCTCAATGGCGAGCTG…
ENSMUSG00000043664	Tmem221	-0.032849116773750436	transmembrane protein 221 [Source:MGI Symbol;Acc:MGI:3525074]	ATGGGCCGTTCCTACGGAGGTCGGGTACTGGCCGCGATGACCCTACTGGGCATCCCGGCCGCGGTGCTGGTCGCGCTGGCTGCGCAGCTGCTGTTCCAGCTCCAGGCAGGGCGCGCGGAGCTTCGGCGCGTACGCACCGACGGGCTGCACCCGGAGCTGGACCCCGATGCCGGGCTACCTGAAGCTGCGGCTGGGGCATTGCTGCCGCTGGCGACCGCGCTGGCCGCGCTGGCACAGGTCCTCGGGCTTAGCTGCTTGCTGCTCGCCGCGCTCTGTGGTCACCTGGGCGCCGAGTTGGCACGCGGGCCGGGGCCGGGCAGGTCGGACTGGTTTCTGTATGACTGCCGCCTCCTCAGGCACTCAGCGCTTGGCCTGTTCTGCTGTGGGGTCTCCGTCTAC…
ENSMUSG00000020847	Rph3al	-0.15505248509786415	rabphilin 3A-like (without C2 domains) [Source:MGI Symbol;Acc:MGI:1923492]	ATGGCTGACACCATCTTCAGCAGTGGAAATGATCAGTGGGTTTGCCCCAACGATCGGCAGCTTGCTCTGAGAGCCAAGCTGCAGACGGGCTGGTCTGTGCACACGTACCAGACGGAGAAGCAGAGGAGGAGCCAGTGCCTGAGCCCCGGAGAGCTGGAGATCATCCTTCAGGTCATCCAGAGAGCAGAGAGGCTAGACATCCTGGAGCAGCAGAGAATTGGGCGGCTGGTGGAGCGGCTGGAGACAATGCAGAGGAACGTGATGGGCAACGGTCTCTCCCAGTGTCTGCTCTGCGGGGAGGTGCTGGGATTCCTGGGCAGCTCCTCCGTATTCTGCAAAGACTGCAGGAAGAAAGTCTGCACCAAGTGTGGGATCGAGGCTTCCCCCGGCCAGAAGCGG…
ENSMUSG00000045867	Cradd	0.0870763692138791	CASP2 and RIPK1 domain containing adaptor with death domain [Source:MGI Symbol;Acc:MGI:1336168]	ATGGAAGCCAGAGACAAGCAGGTACTCCGCTCCCTGCGTCTGGAGCTGGGTGCCGAGGTACTGGTGGAAGGACTGGTTCTTCAGTACCTTTACCAGGAAGGAATTTTGACAGAAAACCACATTCAAGAAATCAAAGCTCAAACCACAGGCCTCCGGAAGACAATGCTGTTGCTGGACATCCTGCCTTCCAGGGGCCCCAAAGCTTTTGACACCTTCCTCGATTCCCTCCAGGAATTTCCCTGGGTAAGAGAGAAGCTGGAGAAGGCGAGAGAGGAAGTCACAGCCGAGCTGCCTACAGGTGACTGGATGGCCGGAATCCCCTCACACATCCTCAGCAGCTCGCCATCAGACCAGCAGATTAACCAGCTGGCTCAGAGGCTAGGCCCGGAGTGGGAGCCC…
ENSMUSG00000051159	Cited1	0.498632777003274	Cbp/p300-interacting transactivator with Glu/Asp-rich carboxy-terminal domain 1 [Source:MGI Symbol;Acc:MGI:108023]	ATGCCAACTATGTCGAGGCCTGCACTTGATGTCAAGGGTGGCACCACCTCTGGGAAGGAGGATGCCAACCAGGAGATGAACTCTCTGGCCTACTCCAACCTTGGAGTGAAGGATCGCAAGGCAGTGACTGTCCTGCACTACCCCGGGGTCACCGCAAATGGAGCCAAAGCCAACGGAGTTCCCACTAGCTCCTCTGGATCGACATCTCCAATAGGCTCTCCTACTGCCACCCCTTCTTCCAAACCCCCATCCTTCAACCTGCATCCTACCCCTCACCTGATGGCCAGCATGCAGCTTCAGAAGCTTAATAGCCAGTACCAAGGGGCTGCGGCTACTGCTGCTGCTGCCCTCACTGGTGCAGGCCTACCAGGGGAGGAAGAGCCCATGCAAAACTGGGTC…
ENSMUSG00000027520	Zdbf2	-0.6151665469993887	zinc finger, DBF-type containing 2 [Source:MGI Symbol;Acc:MGI:1921134]	ATGCAGAAAAGGCAAGGGTATTGCAGCTATTGCCGTGTGCAGTATACTAACCTGGAACAGCACTTGTTTAGTTCTCAGCACAGAAGCCTGACCAGACAGAGCAGACGTCGGACAGCTACTAATAACACTCTGATGGAACGCTTTTTGCAGGATGTTCTGCGACACCACCCATATAATTACCAAGACAACAGATCTGCACCAAATGAGCCAGAGGCGGCGGCAGCAGCGGCAGCAGCAGCAGATCCTGGATCACCTGAAGTGGTGGTGGTTTTGGATGATTCTGATGAGAAGGAGGATGATACTGCAGATAGCGGTGCAGAGAGGAACTCCGAGGATTCAGGATCTGTTGAAGAGATAGATTATAGACCTGGTACTTCTCAGGAACACGCAGAAGTTGCA…
ENSMUSG00000034829	Nxnl1	0.1380800570029194	nucleoredoxin-like 1 [Source:MGI Symbol;Acc:MGI:1924446]	ATGGCATCTCTCTTCTCTGGACGCATCTTGATCAGGAACAACAGCGACCAGGATGAAGTGGAGACAGAGGCAGAGCTGAGCCGTAGGTTAGAGAATCGTCTGGTGTTGCTGTTCTTCGGCGCCGGCGCCTGTCCCCAGTGCCAGGCCTTTGCCCCAGTCCTCAAAGACTTCTTCGTGCGGCTCACTGACGAGTTCTACGTGCTGCGGGCAGCACAGCTGGCCCTGGTCTATGTGTCCCAGGACCCTACAGAGGAGCAACAGGACCTCTTCCTCAGGGACATGCCTGAAAAATGGCTCTTCCTGCCGTTCCATGATGAACTGAGGAGGGACCTCGGGCGCCAGTTCTCTGTCCGTCAACTGCCAGCGGTTGTGGTACTTAAGCCTGGTGGGGACGTGCTG…
ENSMUSG00000074649	BC029722	-0.16465366326734063	cDNA sequence BC029722 [Source:MGI Symbol;Acc:MGI:3584273]	ATGGGCGCTCTCCTGAGTGGTGGCCAGGATGGCCCGGAGCCCGCGCAGCCCCAGCCTCCAGCGCCGCAGGGTCCGCAGCAGCCTCAGCCGGAACCTGGCCCGTGGGGGCCACTGGACGACGTGCGCTTTCTAATCGCCTGCACGTCCTGGTACTGA
ENSMUSG00000033722	BC034090	-0.5319476907808699	cDNA sequence BC034090 [Source:MGI Symbol;Acc:MGI:2672904]	ATGGAGGGGATGGAGGCGGCGGCCAAGCCCGCGCGCCGCTCTCAAGCATCCAGGCCAGGGAGCACAACAAGCCCCACGCAAGTGACTCCAGCCATGGCCAGAGATGGCGCTGAGCAGCCAGACAGTGGACCTCTCCCGAGACCTTCACCCTGCCCCCAGGAAGACCGAGCATCTAACCTGATGCCCCCCAAGCCTCCCAGGACATGGGGGCTGCAGCTCCAAGGTCCTTCTGTGCTGGAGTCCAAGGTAAAGGCCTTGAAGGAGAAAATGACAGCAGGAAAACAAGGGACAGATCCCCGTCCCACTTCCTATGAGCGTCCATCCCCTACAAAATCCAAATGCCACCAAGTCAAGACTGGAGTAGCCTGGAGCCTACCAGATGCCCTGGTGGTCCCCCAT…
ENSMUSG00000036478	Btg1	0.10701023471309137	BTG anti-proliferation factor 1 [Source:MGI Symbol;Acc:MGI:88215]	ATGCATCCCTTCTACACCCGGGCCGCCACCATGATAGGCGAGATCGCCGCCGCGGTGTCCTTCATCTCCAAGTTCCTCCGCACCAAGGGGCTCACGAGCGAGCGACAGCTGCAGACTTTCAGCCAGAGCCTGCAGGAGCTGCTGGCAGAACATTACAAACATCACTGGTTCCCAGAAAAGCCGTGCAAGGGATCAGGTTACCGTTGTATTCGCATCAACCATAAGATGGATCCTCTGATTGGACAGGCAGCCCAGCGGATTGGACTGAGCAGTCAGGAGTTGTTCAGGCTTCTCCCAAGTGAACTCACACTCTGGGTTGACCCCTACGAAGTGTCCTACCGGATTGGAGAGGATGGCTCCATCTGCGTGCTGTACGAAGCCTCACCAGCAGGAGGTAGC…
ENSMUSG00000024218	Taf11	0.3435429194902475	TATA-box binding protein associated factor 11 [Source:MGI Symbol;Acc:MGI:1916026]	ATGGACAACCTCGGGGAGTCGCCCACAGACAAAGGCGGGGAGCCAGGGGAGTCAGAGGAGACGAGGGCTACTCCTGGGGCTTTGGTGGCAGCCGACACTGAGGGAATCCCGGAGGAAACCGACAGGGATGGAGACGCGGACTTGAAAGAAGCCGCGGCGGAGGAAAGCGAGCTCAAGAGTCAGGATGTCTCAGATGTAACAGCAGCCGAGAGGGAAAACTCGTCCTTACTTACTCCTGCAGCCAAAAAGCTGAAACTAGACATTAAGGACAAGAAGGAGAAGAAGCAGAAGGTGGACGAAGATGAGATTCAGAAGATGCAAATCCTGGTCTCTTCTTTTTCTGAGGAGCAGCTGAACCGTTATGAAATGTATCGCAGGTCAGCTTTCCCCAAGGCGGCC…
ENSMUSG00000027612	Mmp24	0.15425433731583585	matrix metallopeptidase 24 [Source:MGI Symbol;Acc:MGI:1341867]	ATGCCGAGGAGCCGGGGCGGCCGCGCTGCGCCGGGCCAGGCCTCGCGCTGGAGCGGCTGGCGGGCCCCGGGGCGGCTGCTGCCGCTGCTGCCCGCGCTCTGCTGCCTCGCGGCGGCGGCGGGGGCCGGGAAGCCGGCCGGGGCGGACGCGCCCTTCGCTGGGCAGAACTGGTTAAAATCATATGGCTATCTGCTTCCCTATGAGTCGCGGGCATCTGCGTTGCATTCTGGGAAGGCCTTGCAGTCCGCGGTCTCCACTATGCAGCAGTTTTACGGGATCCCAGTCACCGGTGTGTTGGATCAGACAACAATCGAGTGGATGAAGAAACCTCGATGTGGCGTCCCTGATCATCCCCACTTGAGCAGGAGGAGGAGAAATAAGCGATATGCCCTAACTGGA…
ENSMUSG00000021645	Smn1	0.03068912321668096	survival motor neuron 1 [Source:MGI Symbol;Acc:MGI:109257]	ATGGCGATGGGCAGTGGCGGAGCGGGCTCCGAGCAGGAAGATACGGTGCTGTTCCGGCGTGGCACCGGCCAGAGTGATGATTCTGACATTTGGGATGATACAGCATTGATAAAAGCTTATGATAAAGCTGTGGCTTCCTTTAAGCATGCTCTAAAGAACGGTGACATTTGTGAAACTCCAGATAAGCCAAAAGGCACAGCCAGAAGAAAACCTGCCAAGAAGAATAAAAGCCAAAAGAAGAATGCCACAACTCCCTTGAAACAGTGGAAAGTTGGTGACAAGTGTTCTGCTGTTTGGTCAGAAGACGGCTGCATTTACCCAGCTACTATTACGTCCATTGACTTTAAGAGAGAAACCTGTGTCGTGGTTTATACTGGATATGGAAACAGAGAGGAGCAA…
ENSMUSG00000063172	Hspb11	-0.2654688497746519	heat shock protein family B (small), member 11 [Source:MGI Symbol;Acc:MGI:1920188]	ATGAGGAAAGTGGATCTCTGCTCAGTCACTGAAGGGACAGAAGTGATTCTGGCCACATCGAGTGATGAAAAGCACCCACCTGAAAACATCATTGATGGGAATCCGGAAACCTTTTGGACCACCACAGGCATGTTTCCCCAGGAGTTCATTATTTGTTTTCACAAACACGTAAAGATTGAAAAGCTTGTGATACAAAGTTACTTGGTGCGGACTTTGAGGATTGAAAAGACCACATCTAAAGAGCCATTGGATTTTGAGCAGTGGGTTGAAAAAGATTTAGTACACACAGAGGGGCAGCTTCAAAATGAAGAAATTGTGGCACGAGATGGCTACGCCACTTTCTTGAGATTCATTATTGTCTCAGCATTTGATCATTTTGCATCTGTGCACAGCATTTCT…
ENSMUSG00000050612	Txndc2	0.05545883621007289	thioredoxin domain containing 2 (spermatozoa) [Source:MGI Symbol;Acc:MGI:2389312]	ATGGACTTGGCCATAGAAGAAATGTTTAAGAAGGACAAACAAAAGAATAAGGACAAGGGGCTGGACATGAACAGTGTTCAAGCAGGAGCTCCTGAAGAGTCGGACATGACACTCAACAACGGAGGAAAAGCAAATGAAAGGGGCAGCAACGAAAATCCATTACAGGCTTTATCCAAAAATGAGGCTTTTCTGGTCCCAGAGTTCTTGGATACAGCCCAGTCCAAAGAGAAGGCCATTGCTTCCAAGGTCAGCAATACACTTCATATGTCCACAGAAGAGTCTGAGTTCCCGCAGCAAGTTAGTAGCACCCCCATGTTTTCAGAGAATACCGTCCATCCCAGACATGAAGTTAGCCCCAAGCCTTCATCAAAAAACACTCAGCTGAAACAGGAAAATATT…
ENSMUSG00000040659	Efhd2	0.12226730812679812	EF hand domain containing 2 [Source:MGI Symbol;Acc:MGI:106504]	ATGGCCACGGACGAGTTGGCCAGCAAGCTGAGCCGGAGGCTGCAGATGGAGGGCGAAGGCGGCGAGGCGACGGAGCAGCCGGGGCTCAACGGGGCGGCGGCGGCGGCGGCGGCCGAGGCTCCCGACGAGACTGCCCAGGCGTTGGGCAGCGCGGACGACGAGCTGAGCGCCAAGCTGCTGCGGCGCGCGGACCTCAACCAGGGCATCGGCGAGCCACAGTCGCCCAGCCGCCGCGTCTTCAACCCCTACACCGAGTTCAAGGAGTTCTCCAGGAAGCAGATCAAAGACATGGAGAAGATGTTCAAGCAGTATGATGCCGGCAGGGATGGCTTCATCGACCTGATGGAGCTGAAACTCATGATGGAGAAGCTGGGGGCCCCCCAGACACACTTGGGCCTC…
ENSMUSG00000038187	Btbd10	-0.35363148715447	BTB (POZ) domain containing 10 [Source:MGI Symbol;Acc:MGI:1916065]	ATGCCCAAGGATGCTGACCTGGCTTTCAGTGCTGCATTGTTTGAAAAAGCAGAGTCCCTTTACACTCTGATTTCAAAATTTTTCTCTTGTTTTTGTGTGTCTACCCTGGCATACACTAAAGGAAGCTCTGCCTCACGTGTTGCTAAGGGAGGAGTCGACCACACCAAAATGAGTCTGCATGGTGCTAGTGGGGGCCATGAGAGATCAAGAGATAGACGCCGGTCAAGTGACAGATCACGAGATTCATCTCATGAGAGAGCAGAGTCTCAGCTTACTCCTTGTATTCGAAATGTGACTTCACCAACAAGGCAGCATCATATTGAACGAGAAAAAGACCATAGTTCTTCTCGTCCAAGCAGTCCTCGTCCTCAAAGAGCATCCCCAAATGGCTCCATGAGC…
ENSMUSG00000026649	Cfap126	-0.07862312321327022	cilia and flagella associated protein 126 [Source:MGI Symbol;Acc:MGI:1922722]	ATGAGACCAAAGTGCGGATCTGGGGACTTGCAGGCCACTCGGCCCATCCTCAGCTTCCGGTTCCTTCTCCCGGACGCAGCCTGTCCCTCCTCGTCTCCTGGTCGCCCCGCCTTCATGCCCGGTCTCACGGTCCCAGTAGCGCTTTCCCGGTACTCAGGCTATGAAAAAGCTTACTTACCCACGTACCTGCAGAACTGGTCTCCTGCCAGGCCAACGAAAGAGAAAATCGCTGCCCATGAAGGTTACACTCAGATCATCGCCAACGATCGAGGGCATCTCTTGCCTTCAGTGCCCCGTTCCAAGGCAAGTCCTTGGGGTTCCTTCATGGGCACCTGGCAAATGCCCCTGAAGATCCCACCTGCTAAGGTGACCTTGACCGCCCGTACAACTACAGCTGCC…
ENSMUSG00000023153	Tmem52	-0.15976591209700394	transmembrane protein 52 [Source:MGI Symbol;Acc:MGI:1916921]	ATGGCCCCGGGGCCGTCAGCCACACAGGGGATCCTGCTGCTGCTGCCTCTCCTGCCTCTGTCCCAGGTGACGCTGGGTTCCGCGGACCGCAACTGTGACCCCTCGGATCAGTGCCGCTGTCCCCGCAGGTGCCCGCCCCAGGCCCGCTGGAGCAGCCTATGGCATGTGGGGCTCATCCTGCTCGCCATACTCCTGATGCTTTTGTGTGGGGTCACAGCCAGCTGTGTACGATTCTGCTGCCTCAGGAAGCAGACGCACACCCAGTCACACACGCCAGCGGCGTGGCAGCCCTGTGACGGGACAGTCATCCCAGTGGACAGTGATAGCCCCGCACACAGCACTGTGACCTCCTACAGTTCCGTGCAGTACCCACTGGGCATGCGGCTGCCCCTGTACTTT…
ENSMUSG00000022157	Mcpt8	-0.00944629855272536	mast cell protease 8 [Source:MGI Symbol;Acc:MGI:1261780]	ATGTTCCTGCTCCTGGTCCTCCTGGTGGCTGCCCTGCCAGTCAACGCTGAAGGAGGGGAAATCATATGGGGTACAGAGTCCAAACCCCACTCCCGGCCCTATATGGCATACATAAGGTTTAATGACAGCAAATCAGTCTATCGCTGTGGTGGTTTCCTGGTGGCAAGAGACATCGTAATGACAGCAGCTCACTGTAATGGAAAAGTTATAAATGTAACCTTAGGAATTCACAATCTCAAGAAAAAGAAAAACACCCAGCTCATTCCTGTCAGTGAAGCCATACCTCACGAGAGCTTTGACAATGAAACACTGGTCAATGACATCATGCTCCTGAAGCTGGAACGCAAAGCTCAACTCAACAGTGCTGTGGATACTATTGCCCTTCCAAAGAGCAAGGAT…
ENSMUSG00000063047	Zfp780b	-1.1382829986026988	zinc finger protein 780B [Source:MGI Symbol;Acc:MGI:2444764]	ATGGCCAACTCTAATTCTCAAGACATGGTCTGTGGGTCAGTGACATTTAGGGATGTGGCTGTTGACTTCTCTCAGGAGGAGTGGGCCTGCCTGGATGCTACTCAGAAGGTCTTATACAGGGACATGATGTTGGAGACCTACAGCAACCTGGTCGCAGTGGTGGGACGTTGCATTTCCAAGCCAGATCTGATCGTCTTACTAGAGCAGGAGAAAGAGCCCTGGATGGCTGTGAAGGAAGAAACAGACAGGCCGAGCCCAGACTTGGAGACAGATTATGATGCTGAAAATATATCTCCAGAAAATCCTATTAATAATAAAAAATTCCTCAAACAGAGCATAAAGCAATTAATAACTTTTGACCCTAAGGACTCTAGTACTAGTATTGGCCCCAACTATAGT…
ENSMUSG00000034932	Mrpl54	0.5449865227679876	mitochondrial ribosomal protein L54 [Source:MGI Symbol;Acc:MGI:1913297]	ATGGCGGCCGCCCATCTCCTCCGGGCTTCCCGGGTGTGGGCCCGCTGGCATCCCCGGGCGCTCCCGGTCCTCAGAAGACCTGGAGGATTCTCTATCCGGGAATATGCTAAAAAGCCAGTTGGCAAGGGCGGCAAGGGCGGCGTGGCCGCTGAGGCCCTGAAGGACCCCGAGGTGTGCACAGACCCCACTCAGCTCACCACACATGCCATGGGGGTCAACATCTACAAGGAAGGCCAGGATGTGGCCCTGAAGGCAGACTCCGAGTACCCCACATGGCTGTTCCAGGTGAACTTGGGTCCCCCCAAAAAGCTAGAGGAACTAGAACCAGAGTCCCGAGAGTACTGGCGACTACTTCGCAAACAGAATATCTGGCGCCACAACCGGCTGAGCAAGAACAAG…
ENSMUSG00000067010	Vmn2r10	-0.16591454590366936	vomeronasal 2, receptor 10 [Source:MGI Symbol;Acc:MGI:1316730]	ATGAAAAACCTGTGTGTTTTCACTCTTTCCTTTTTCCTCCTGGAGTTTTCTCTGATCTTGTGCCATTTGACTGAACCCATTTGCTTTTGGAGGATAAATAATAATGAAGATAATGATGGAGATTTGAGAAGTGACTGTGGTTTTTTCCTTGCAGCAGTTGAGGGACCTACTGACGACTCTTATAATATCTCTGATCTTAGAATACCAGCAAGAAGATATGAGTTTTTCCTAGTAATGTTTTTTGCAACTGATGAAATCAATAAGAATCCTTATCTTTTACCCAACATGTCTTTGATATTCCCCATTAATCATGGTCAGTGTGAAAAAACATTGGGAGATCTGGATAAAATATATTCAGAAAAGAACTATACTGTGGAATTTACTGATTATATCTGTGTA…
ENSMUSG00000032306	Mpi	0.3190650102248951	mannose phosphate isomerase [Source:MGI Symbol;Acc:MGI:97075]	ATGGCGAGTCCGCGAGTGTTCCCACTTTCCTGTGTGGTGCAGCAGTATGCCTGGGGGAAGGTGGGCTCCAAAAGTGAAGTGGCATGCCTGCTGGCTAGCAGTGATCCACTGGCCCAGATTTCAGAGGACAAGCCATATGCAGAGCTGTGGATGGGGACACACCCCCGGGGAGATGCCAAGATCCTTGACAACCGTATTTCCCAGAAGACCTTAGGCCAGTGGATTGCTGAAAACCCGGACTGCTTGGGCTCAAAGGTCAAAAACACCTTTAATGGAAAGCTGCCCTTCCTCTTCAAAGTACTGTCAGTGGACACGGCCCTGTCTATCCAGGCACACCCTAACAAGGAGCTGGCAGAGAAGCTGCATCTCCAGGCTCCAGAGCACTACCCTGATGCCAAC…
ENSMUSG00000039997	Ifi203	-0.5722487559256123	interferon activated gene 203 [Source:MGI Symbol;Acc:MGI:96428]	ATGATGGCTGAATACAAGAATATTGTTCTTCTAAAAGGATTAGAGAACATGGAGGACTATCAGTTTAGGACAGTCAAGTCCTTACTAAGAAAAGAACTAAAACTTACTAAAAAAATGCAAGAAGATTATGATAGGATTCAGCTGGCGGACTGGATTGAGGACAAGTTCCCCAAAGATGCTGGACTAGACAAACTGATAAAAGTGTGTGAGCACATAAAAGATCTTAAAGACCTTGCTAAAAAACTTAAAACAGAGAAGGCAAAAGTTCAAAAGAAAAAGGAAGGAAAATGCAAAACGGCTGGGAAAAAAAAAGGGCAAGATGAACTCAGTTCTTCTGAATCTCTTTTCAACAATAAAGAATCAAACAAGAGTGTACCGTCTTCAAAGAAAAAGAGAAAA…
ENSMUSG00000035506	Slc12a8	0.21040825813706657	solute carrier family 12 (potassium/chloride transporters), member 8 [Source:MGI Symbol;Acc:MGI:2443672]	ATGGCCCAGAGGTCTCCGCAAGAACTCTTCCACGAGGCAGCCCAGCAGGGCATCCTGGCCCAGCCCCAGCCCTGGTGGAAGATCCAGCTGTTCATGTGGGAGCCGGTGCTGTTTGGGACCTGGGATGGTGTGTTCACATCCTGCATGATCAACATTTTTGGCGTTGTCCTTTTCTTGAGGACCGGCTGGCTGGTGGGAAACACAGGTGTGCTCCTGGGCTTGCTCCTGGTGTCCTTCGTCGTCCTCGTGGCCCTCATCACCGTGCTGTCGGGCATTGGTGTCGCAGAGCATGGCGGGATCAGCAGTGGCGGTGTCTACTCCATGATCTCCTCGGTGCTTGGTGGGCAGATGGGAGGCACTGTGGGGCTGCTCTATGTATTTGGACAGTGTGTTGCAGGT…
ENSMUSG00000027827	Kcnab1	0.17043756979288663	potassium voltage-gated channel, shaker-related subfamily, beta member 1 [Source:MGI Symbol;Acc:MGI:109155]	ATGCTGGCAGCCCGCACAGGCGCTGCAGGGAGTCAGATCTCCGAAGACAACAGCAAGTTCAGAAAGCAGTCTGGCCTTTCTTCAGGGGGGAAAGACAGATCTCCCAAGAAAGCCCCCGAGAATGCCAAAGACAGCAGCCTCAGCCCAACCGGGCAAAGCCAGCTCAGGGCAAGGCAGCTGGCCCTGCTGCGGGAGGTGGAGATGAACTGGTACCTAAAGCTCTGCGAGCTGTCCAGCGAGCACACCACGGCACACACCACCGGGATGCCGCACAGGAATCTTGGGAAATCAGGACTCAGAGTTTCATGCTTGGGTCTTGGAACATGGGTGACATTTGGAGGTCAAATCTCAGATGAGGTTGCTGAACGGCTGATGACAATTGCCTACGAAAGTGGAGTT…
ENSMUSG00000031965	Tbx20	-0.18963614310532825	T-box 20 [Source:MGI Symbol;Acc:MGI:1888496]	ATGGAGTTCACGGCGTCGCCCAAGCCCCAGCTCTCCTCTCGAGCCAATGCCTTCTCCATCGCCGCGCTTATGTCCAGCGGCGGCCCCAAGGAGAAGGAGGCAGCAGAGAACACCATCAAACCCCTGGAACAATTTGTGGAGAAATCATCATGTGCCCAGCCACTGGGTGAGCTGACGAGTCTGGATGCTCACGCGGAGTTTGGCGGCGGGGGCGGCAGCCCATCCTCATCCTCTCTGTGCACAGAGCCACTGATACCCACCACCCCCATCATCCCCAGCGAAGAGATGGCTAAAATCGCCTGCAGCCTGGAAACGAAGGAGCTCTGGGACAAATTCCATGAACTGGGCACGGAGATGATAATCACCAAGTCTGGCAGGAGGATGTTCCCCACCATCCGC…
ENSMUSG00000029458	Brap	0.12663321321341084	BRCA1 associated protein [Source:MGI Symbol;Acc:MGI:1919649]	ATGAGTGTGTCACTGGTGGTCATCCGACTGGAGCTCGCGGGTCACTCGCCGGTCCCCACCGACTTCGGCTTCAGCGCCGCCGCTGGAGAGATGTCTGATGAGGAGATCAAAAAGAAGACATTGGCTTCCGCTGTCGCCTGTCTAGAAGGGAAGTCAGCCGGGGAGAAAGCAGCCATCATCCACCAGCACCTTGGCCGTCGGGAAATGACGGATGTGATTATTGAGACCATGAAGGCCAGAGCAGATGAAGTGAGAGACACAGTGGAAGAAAAGAAGCCTTCAGCAGCCCCTGTCTCTGCACAGAGAAGTAGAGAACAGAGTGAGTCTGTGAACACAGCCCCAGAGTCTCCATCCAAACAGCTCCCAGACCAGATTTCCTTCTTCAGTGGCAACCCTTCT…
ENSMUSG00000096916	Zfp850	-1.4770185899124482	zinc finger protein 850 [Source:MGI Symbol;Acc:MGI:3036281]	ATGGCCAGCTCTAATTCTCAAGACATGGTCTGTGGGTCAGTGACATTTAGGGATGTGGCTGTTGACTTCTCTCAGGAAGAGTGGGCCTGCCTGGATGCTACTCAGAAGGTCTTATACAGGGACATAATGTTGGAGACCTACAGCAACCTCATTGCAGTGGTGGGAAGTTGCATTTCCAAGCCAGATCTGATCGTCTTACTAGAGCAGGAGAAAGAGCTCTGGATGGCTGTGAAGGAAGAAACAGACAGGTTGAGCCCAGATTTGGAATCAGATTATGAAGCTCAACAAATATCTCCAGACAACCACATATATACTATAAATTTACCCAAACAGACCATAAAGCATATAAGTGAAACTTTTGAACTCAAGGGCTCCAGTTTTAGTAATGGCCACAGCTAT…
ENSMUSG00000056515	Rab31	0.5401276648179979	RAB31, member RAS oncogene family [Source:MGI Symbol;Acc:MGI:1914603]	ATGATGGCGATACGGGAGCTCAAAGTGTGTCTTCTCGGGGACACGGGGGTTGGGAAATCCAGCATTGTGTGTCGTTTTGTCCAGGATCACTTTGACCACAACATCAGCCCCACTATTGGGGCATCTTTCATGACCAAAACCGTGCCTTGTGGAAATGAACTTCACAAATTCCTCATCTGGGACACCGCTGGCCAGGAGCGGTTCCACTCCCTGGCTCCTATGTACTACCGAGGATCTGCTGCAGCCGTCATCGTCTATGACATCACTAAGCAGGATTCATTTCATACCTTGAAAAAATGGGTCAAGGAGCTGAAGGAGCACGGCCCAGAAAACATTGTGATGGCGATTGCTGGGAACAAGTGTGACCTCTCTGATATTAGGGAGGTGCCCCTGAAGGAC…
ENSMUSG00000095603	Olfr106-ps	-0.05647366014382768	olfactory receptor 106, pseudogene [Source:MGI Symbol;Acc:MGI:2177489]	ATGTCTGCTCCTACCAGTGTATATCAGGGAAGCAATTCAGTGTTATTGAATCAAACATTAGTCACCGAATTTCTCCTATTGGGAGTGACAGACATACAAGAACTGAACCCTATTCTGTTTGTCACGGTCCTTGCCATGTACTTTGTAAATGTGGCTGGGAATGGAGCCATCCTGCTGATTGTCATTTCAGATCCAAGACTCCACTCACCTATGTATTTCTTCCTGGGAAACCTAGCATGTCTAGACATCTGCTTCTCCACTGTAACAGTGCCAAAGATTCTAGATAACTTCTTCTCCACAAGCAAAGCAATTTCCTTCTTGGGGTGCATAACTCAGCTTTATTTTTTCCACCTTCTGGGTAGCACAGAAGCCCTGCTGCTGGCCGTGATGGCATTTGAC…
ENSMUSG00000053783	1700016K19Rik	-0.27380257235683436	RIKEN cDNA 1700016K19 gene [Source:MGI Symbol;Acc:MGI:1921480]	ATGGCCGGCCGTGGTGGGACCGGTGCGGCGGAGTATGGTGAGGAGGGCGAGGAAGAGGAGGAGGAGGAGGCGCGGGAAGGCGGAGCTGAGGGCTCCCCGGGGTCCAAGCTGCCTCCCATCGTGGGCACCGCCTCCGAGCTGGCCAAACGGAAGGTGAAGAAGAAAAAGAAGAAGAAAAAGACTAAAGGATCGGGCAAGGGCGACGCAGATAAACATCACAGTCGAGGGCGGAAGAATCAGCCGCTTTCTTCATCTTTCCATGACATCTTAAATCCCCACAAAGACCATGGCTTGAGAGCAGAGCCCAGAGACAAAGAGGAAAATAGGCAAACCCTTCCCTATTCGTACAGCATTAATCACCCCTGCTTTGCCGAAATAGAAGACACCCTTTCCAGCCAG…
ENSMUSG00000028057	Rit1	0.6389018981968523	Ras-like without CAAX 1 [Source:MGI Symbol;Acc:MGI:108053]	ATGGAGTCCGGAGCTCGCCCCATTGGTAGCAGCTGTAGCAGCCCTGCAGCACTCTCCCGGGAATACAAACTAGTGATGCTGGGTGCCGGTGGAGTTGGGAAGAGTGCCATGACAATGCAGTTCATCAGCCACCGATTCCCAGAAGACCATGACCCCACCATTGAAGATGCTTATAAGATCCGGATCCGCATTGATGATGAACCTGCCAATCTGGACATCCTGGACACAGCAGGACAGGCAGAGTTTACAGCCATGCGGGATCAGTATATGAGGGCAGGAGAAGGATTCATCATCTGTTACTCCATCACGGATCGTCGAAGTTTCCACGAAGTTCGGGAGTTTAAACAACTGATTTACCGGGTCCGACGCACCGATGATACACCGGTGGTTCTTGTGGGG…
ENSMUSG00000031103	Elf4	-0.17190610524437186	E74-like factor 4 (ets domain transcription factor) [Source:MGI Symbol;Acc:MGI:1928377]	ATGGCTATTGCTCTGCAGCCCAGTGATCTGGTCTTCGAGTTTGCAAGCAACGGGATGGATGATATCCACCAGCTGGAAGACCCTTCAGTGTTCCCAGCCGTGATCGTGGAACAGGTCCCCTATCCTGAATTAGTGCATCTGTGCTCAGGACTGGATCTGGATGAGGTCCACAATGGCATCATAAGGGACAGGACCTTGTGCATGACACAGGATCAGATTTTAGAAGGCAGTATTTTGCTGACAGATGATGATGTATCCACCTCAAATAACGTGTCATCCACTGAAGTCCTATTCAATGTGGCAACTCCCAGTGATGTCCTGGATGAGAAGCAGATCTTCAGCTCACCGGAAGTGCTTTCAGACTCCAACTCTGTTCAGGCCATCAATCTACCCAACTTC…
ENSMUSG00000029819	Npy	0.3373809463170323	neuropeptide Y [Source:MGI Symbol;Acc:MGI:97374]	ATGCTAGGTAACAAGCGAATGGGGCTGTGTGGACTGACCCTCGCTCTATCTCTGCTCGTGTGTTTGGGCATTCTGGCTGAGGGGTACCCCTCCAAGCCGGACAATCCGGGCGAGGACGCGCCAGCAGAGGACATGGCCAGATACTACTCCGCTCTGCGACACTACATCAATCTCATCACCAGACAGAGATATGGCAAGAGATCCAGCCCTGAGACACTGATTTCAGACCTCTTAATGAAGGAAAGCACAGAAAACGCCCCCAGAACAAGGCTTGAAGACCCTTCCATGTGGTGA
ENSMUSG00000067567	Hdac8	0.5773851962186077	histone deacetylase 8 [Source:MGI Symbol;Acc:MGI:1917565]	ATGGAGATGCCAGAGGAACCCGCCAACAGTGGGCATTCACTACCCCCGGTTTATATTTACAGTCCCGAGTATGTCAGCATCTGCGACTCCCTTGTGAAGGTCCCCAAACGGGCCAGTATGGTCCACTCTCTGATCGAAGCCTATGCCCTGCATAAACAAATGAGGATAGTGAAGCCCAAAGTGGCCTCCATGGAGGAGATGGCCACCTTCCACACTGATGCCTATCTGCAACATCTCCAGAAAGTCAGCCAAGAAGGTGATGAGGACCATCCAGACTCCATAGAATATGGACTAGGTTATGACTGCCCAGCCACAGAAGGGATATTTGACTATGCAGCAGCTATAGGAGGAGGTACAATCACAGCTGCCCAGTGCCTGATTGACGGGAAGTGTAAAGTA…
ENSMUSG00000043962	Thrap3	-0.7372907185235041	thyroid hormone receptor associated protein 3 [Source:MGI Symbol;Acc:MGI:2442637]	ATGTCAAAAACAAACAAATCCAAGTCTGGGTCTCGCTCTTCTCGCTCAAGATCTGCATCCAGATCTCGGTCTCGTTCGTTTTCAAAGTCTCGGTCCCGAAGCCGATCTGTCTCTCGTTCAAGGAAGCGCAGGCTGAGTTCTAGGTCTCGTTCCAGATCATATTCTCCAGCTCATAACAGAGAAAGGAATCACCCCAGAGTGTATCAGAATCGAGATTTCCGAGGTCATAACAGAGGCTACAGGAGGCCCTATTACTTCCGTGGGCGAAACCGAGGCTTTTATCCATGGGGCCAGTATAACCGAGGTGGCTATGGAAACTACCGTTCCAATTGGCAGAACTACCGGCAAGCATACAGCCCTCGTCGGGGCCGTTCTCGATCCCGGTCCCCAAAGAGAAGG…
ENSMUSG00000062510	Nsl1	0.1769273394106088	NSL1, MIS12 kinetochore complex component [Source:MGI Symbol;Acc:MGI:2685830]	ATGGCGGCTGTCTCTGAAACAGTGCTCGTCTCCGCCCCGCAGGACCACGATGCCCAGGCCGCCTCAGACCCTCAGGCCACGGCAGCAGACTCTCCCCTAGAGGACTTCCGAGTGCGCTGCACCTTGAAGAGGGCGGTGATGGAAGTGATGGAGATGTGCGGTCGCTTCGTGCAGGAGCTCGGGGCCGTGCTGCCGGAGGACGTCCGCGAGCTCGCGCTGCGGGACGCACAGTGGACATTTGAGTCGGCTGTGCAGGAGAACGTCAGCTTTAACGGACAGGCCTGGGAGGAAGCTAAAGAGCATGGCTTAATGGATTCTGACATCAAAGTGCTTGAAGATGAATTTGATGAGCTCATAGTAGATGTGGCAACCAAACGGAGGCAGTATCCCAGAAGGATC…
ENSMUSG00000074476	Spc24	-0.12076510913149238	SPC24, NDC80 kinetochore complex component, homolog (S. cerevisiae) [Source:MGI Symbol;Acc:MGI:1914879]	ATGGCGGCTTTCCGCGACATGGTGGAGGTGAGCAACTGGCTACTGAGCCTGCTGGGGGCCAACCGCGCCGAGGCGCAGCAGCGGCGGCTGCTCGGGAGCTACGAGCAGATGATGGAGCGGCTGCTGGAGATGCAGGACGGCGCCTACCGGCAGCTTCGGGAGACTCTGGCTGTGGAGGAGGAAGTGGCTCAGAGCCTTCTTGAACTGAAAGAATGTACGCGCCAGGGGGACACCGAGCTGCAGCAGCTGGAGGTGGAGCTCCAGAGGACCAGCAAGGAGGACACCTGTGTGCAGGCTAGGCTACGTCAGCTCATCACAGAGCTGCAGGAGCTCAGGGAGATGGAGGAAGAGCTCCAGCGCCAGGAGAGGGATGTAGATGAGGACAACACCGTCACCATC…
ENSMUSG00000024600	Slc27a6	0.19593395686675155	solute carrier family 27 (fatty acid transporter), member 6 [Source:MGI Symbol;Acc:MGI:3036230]	ATGCTCCTGTCATGGCTCACAGGATTGGGGGCTGGACTGCTCTCCCTGCATTTCCTGCAGAAACTTCTGTTCCCGTATTTCTGGGATGATTTCTGGTACTTGCTGAAGGTGGTGCGCTACGGAATTCAGATGGAGATGTACAAACTGAGGGGGGAGCTGGTCACGGTGCTGGATAAGTTCCTGAGCCACACCAGGAAGCAACCACGGAAAGCCTTCATCATTTATGAGGGGGACGTCTACACCTACGAGGACGTGGACAAGAGGAGTAACAGAATAGCCCACGCTCTCCTGAACCACTCCTCGCTGAAAAGGGGGGACGTTGTGGCTTTGTTGATGAGCAACGAGCCCGACTTCGTTCATGTGTGGTTTGGCCTGGCTAAACTGGGCTGCGTGGTGGCC…
ENSMUSG00000043460	Elfn2	-0.20731817213532064	leucine rich repeat and fibronectin type III, extracellular 2 [Source:MGI Symbol;Acc:MGI:3608416]	ATGCTGCGCCTGGGGCTGTGTGCGGCAGCGCTGCTGTGCGTGTGCCAGCCAGGGGCTGTGCGCGCTGACTGCTGGCTCATCGAGGGGGACAAGGGCTACGTGTGGCTGGCCATCTGCAGCCAGAACCAGCCTCCATATGAGACCATCCCTCAGCACATCAACAGCACTGTGCATGACCTGCGGCTCAATGAAAACAAGCTCAAGGCCGTGCTCTATTCCTCCCTCAACCGCTTCGGGAACCTCACGGACCTCAACCTCACCAAGAACGAGATTTCCTACATCGAGGATGGTGCCTTCCTGGGCCAGACGAGCCTGCAGGTCCTGCAGCTGGGCTACAACCGGCTCAGCAACCTGACTGAGGGCATGCTGCGAGGTATGAGCCGCCTGCAGTTCCTCTTC…
ENSMUSG00000028979	Masp2	-0.19312166675243167	mannan-binding lectin serine peptidase 2 [Source:MGI Symbol;Acc:MGI:1330832]	ATGAGGCTACTCATCTTCCTGGGTCTGCTGTGGAGTTTGGTGGCCACACTTCTGGGTTCAAAGTGGCCTGAACCTGTATTCGGGCGCCTGGTGTCCCCTGGCTTCCCAGAGAAGTATGCTGACCATCAAGATCGATCCTGGACACTGACTGCACCCCCTGGCTACCGCCTGCGCCTCTACTTCACCCACTTTGACCTGGAACTCTCTTACCGCTGCGAGTATGACTTTGTCAAGTTGAGCTCAGGGACCAAGGTGCTGGCCACACTGTGTGGGCAGGAGAGTACAGACACTGAGCAGGCACCTGGCAATGACACCTTCTACTCACTGGGTCCCAGCCTAAAGGTCACCTTCCACTCCGACTACTCCAATGAGAAGCCGTTCACAGGGTTTGAGGCCTTC…
ENSMUSG00000027230	Creb3l1	-0.05906430869299592	cAMP responsive element binding protein 3-like 1 [Source:MGI Symbol;Acc:MGI:1347062]	ATGGACGCCGTCTTGGAACCTTTCCCGGCCGACAGGCTGTTCCCGGGATCCAGCTTCCTGGACTTGGGAGACCTGAATGAGTCGGATTTCCTCAACAATGCGCACTTCCCGGAGCACCTGGACCACTTTGTGGAGAACATGGAGGACTTCTCCAATGACCTGTTCAGCAGTTTCTTTGATGACCCTGTGCTGGACGAGAAGAGTGCTCTGCTGGACATGGAACTGGACTCCCCCGCTCCAGGCATCCAGGCTGAGCACAGCTACTCCCTGAGTGGGGATTCTGCACCCCAGAGCCCCCTTGTGCCTGTCAAGATGGAGGACACCACTCAAGATGTGGAACACGGAGCGTGGGCCCTGGGAAACAAGCTGTGCTCCATCATGGTGAAGCAGGAGCAGAGC…
ENSMUSG00000027351	Spred1	-0.6380311603412757	sprouty protein with EVH-1 domain 1, related sequence [Source:MGI Symbol;Acc:MGI:2150016]	ATGAGCGAGGAGACGGCGACTTCTGACAACGATAATAGTTATGCACGAGTGCGAGCTGTGGTGATGACCAGAGATGACTCAAGTGGTGGATGGCTACCACTCGGAGGGAGCGGACTGAGCAGCGTCACTGTCTTCAGAGTCCCTCATCAGGAAGAGAATGGCTGTGCGGACTTTTTTATCCGTGGAGAGAGACTCAGAGACAAAATGGTGGTTTTGGAATGTATGCTTAAGAAAGACCTCATCTATAATAAGGTCACTCCCACATTTCACCACTGGAAGATCGATGACAAGAAGTTTGGCCTTACCTTTCAGAGTCCTGCTGATGCCAGGGCTTTTGATCGAGGCATTCGAAGAGCTATAGAGGATATATCTCTAGGGTGCCCAGCGTCAAAAACTGAG…
ENSMUSG00000025743	Sdc3	0.043824391951682	syndecan 3 [Source:MGI Symbol;Acc:MGI:1349163]	ATGAAGCCCGGGCCGCCGCGCCGCGGGACCGCACAGGGGCAGCGCGTGGACACCGCCACCCATGCGCCCGGGGCCCGCGGGCTGTTGCTGCCACCGCTGCTGCTGCTGCTGCTGGCCGGCCGCGCCGCGGGGGCTCAACGCTGGCGCAATGAGAACTTCGAGAGGCCGGTGGATCTTGAGGGCTCAGGGGATGACGACTCGTTTCCTGATGATGAACTAGACGACCTCTACTCGGGGTCAGGCTCTGGCTACTTCGAGCAGGAGTCCGGCCTTGAGACGGCCATGCGGTTCATCCCTGATATGGCCCTGGCTGCGCCCACTGCACCTGCCATGCTACCCACAACCGTTATCCAGCCCGTGGACACCCCATTTGAGGAACTCCTTTCTGAGCACCCCAGC…
ENSMUSG00000040314	Ctsg	0.09822614377072672	cathepsin G [Source:MGI Symbol;Acc:MGI:88563]	ATGCAGCCTCTCCTGCTCCTGTTGACCTTTATTCTACTCCAAGGAGATGAGGCAGGGAAGATCATTGGAGGCCGAGAAGCCAGGCCCCATTCCTACCCCTACATGGCATTTCTTCTGATCCAGAGTCCAGAAGGGCTGAGTGCTTGTGGAGGGTTTCTGGTGCGAGAAGACTTCGTCCTAACAGCAGCTCATTGCTTGGGAAGCTCCATAAATGTTACTCTAGGGGCCCACAACATCCAAATGCGAGAAAGGACCCAGCAACTCATCACAGTGCTCAGAGCCATCCGCCATCCTGATTACAATCCGCAGAACATCCGGAATGACATCATGCTTCTGCAGCTGAGGCGCAGAGCCCGGAGGAGTGGATCGGTGAAGCCTGTGGCTCTGCCTCAGGCCAGC…
ENSMUSG00000005483	Dnajb1	0.5865338853214227	DnaJ heat shock protein family (Hsp40) member B1 [Source:MGI Symbol;Acc:MGI:1931874]	ATGGGCAAGGACTACTATCAGACGCTGGGCCTGGCCCGCGGCGCGTCCGACGACGAGATCAAGCGAGCCTACCGCCGCCAGGCGCTGCGCTACCACCCGGACAAGAACAAGGAGCCCGGCGCTGAGGAGAAGTTCAAGGAGATCGCCGAGGCCTACGACGTGCTCAGCGACCCGCGCAAGCGCGAGATTTTCGACCGCTATGGAGAGGAAGGCCTGAAGGGTGGTAGCCCCAGTGGAGGAAGCAGTGGTGGTGCTAATGGTACCTCTTTCAGCTACACATTCCACGGAGACCCCCATGCCATGTTTGCTGAGTTCTTCGGTGGCAGAAACCCCTTTGATACCTTTTTTGGGCAGCGCAACGGGGAAGAAGGCATGGACATTGATGACACATTCTCTAGC…
ENSMUSG00000063188	Olfr107	-0.2623222667620674	olfactory receptor 107 [Source:MGI Symbol;Acc:MGI:2177490]	ATGAACTGTAGTAAGACTCCTGGCTTTATCCTGTTGGGACTTTCCAGTGACCCAGAGAAATGGCAGCCCCTCTTTAATATTTTCCTCTGTCTCTACTTGCTGGGCCTTTTAGGGAACCTGCTACTTCTGTTAGCTATTGGCACTGATGTCCACCTCCACACCCCCATGTATTTCTTCCTCAGTCAGCTCTCACTAGTGGATCTTTGCTTCATCACCACAACAGCCCCTAAAATGCTGGAGGCTCTGTGGACTGGAGATGGATCAATCTCATTCTCTGGATGCCTGACTCAGTTTTACTTCTTTGCTGTTTTTGCTGACATGGATAACCTGCTTCTGGCAGTCATGGCTATTGACCGCTATGCTGCTATCTGCCACCCCCTGTTCTACCCATTTCTAATG…
ENSMUSG00000021966	Prss52	-0.03531548171950635	protease, serine 52 [Source:MGI Symbol;Acc:MGI:1920632]	ATGAAACGATGGAAGGACAGAAGAACAGGCCTGTTGCTGCCATTGGTCCTCCTGTTGTTTGGGGCATGTAGCTCACTGGCATGGGTATGTGGCCGGCGAATGAGTAGCAGATCCCAACAACTTAACAATGCTTCTGCTATCGTGGAAGGCAAACCTGCTTCTGCTATCGTGGGAGGCAAACCTGCAAACATCTTGGAGTTCCCCTGGCATGTGGGGATTATGAATCATGGTAGTCATCTCTGTGGGGGATCTATTCTCAATGAGTGGTGGGTTCTATCTGCATCCCATTGCTTCGACCAACTAAACAACTCTAAATTGGAGATCATTCATGGCACTGAAGACCTCAGCACAAAGGGCATAAAGTATCAGAAAGTGGACAAGTTATTCTTGCACCCAAAG…
ENSMUSG00000022156	Gzme	0.3871915769706312	granzyme E [Source:MGI Symbol;Acc:MGI:109265]	ATGCCACCAGTCCTGATTCTCCTGACCCTACTTCTGCCTCTTGGAGCTGGAGCAGAGGAGATCATCGGCGGCCATGTGGTGAAGCCACACTCCCGCCCCTACATGGCGTTTGTTAAGTCTGTGGATATTGAAGGTAATAGGAGATACTGTGGAGGCTTCTTGGTTCAAGATGACTTTGTGCTGACTGCTGCTCACTGCAGGAACAGGACAATGACAGTCACACTGGGGGCCCACAACATCAAGGCTAAGGAGGAGACACAGCAGATCATCCCTGTGGCAAAAGCCATTCCCCATCCAGATTATAATGCCACTGCCTTCTTCAGTGACATCATGCTGTTAAAGCTGGAGAGTAAGGCCAAGAGAACTAAAGCTGTGAGACCCCTCAAGTTGCCCAGACCC…
ENSMUSG00000039198	Ptchd3	-0.07456442121364013	patched domain containing 3 [Source:MGI Symbol;Acc:MGI:1921925]	ATGATCTCCTCCAAGGTGGCGCCCGGAGAGGAGGAGCAGGGGGAGTCACCGTCCAAGGTGGAGCTCGGAGAGGCGGAGGAGCAGCGGGAGGCACCGTTGGAAGGCCAACTGGAAGCCGTGCCACTTGATGAGGCGGGCCCTAGCTGGACCACCGGGCCGCCACTGGAGCGCTTGCCACCGCTGGGTCAGGAGGCACCTCCGCCGCGTCGCTGCCACACCAACTGCTTGGAAGCACCGCTGTCGCGGGGCTTCCAACGCTTTGGCGCCACAGTGGGCGCGAACCCCTGGCTGTTTTTGCTCGGGCCTGCACTGCTGACGGCCTCCCTGGGCACCGGTCTCATTTTCCTACCCAAGGAAAAGGAGAACCTGGAGGAGCAGTACACACCGATTGGCAGCCCA…
ENSMUSG00000052160	Pld4	-0.22787888918983742	phospholipase D family, member 4 [Source:MGI Symbol;Acc:MGI:2144765]	ATGGACAAGAAGAAAGAGCACCCAGAGATGCGGATACCACTCCAGACAGCAGTGGAGGTCTCTGATTGGCCCTGCTCCACATCTCATGATCCACATAGCGGACTTGGCATGGTACTGGGGATGCTAGCTGTACTGGGACTCAGCTCTGTGACTCTCATCTTGTTCCTGTGGCAAGGGGCCACTTCTTTCACCAGTCATCGGATGTTCCCTGAGGAAGTGCCCTCCTGGTCCTGGGAGACCCTGAAAGGAGACGCTGAGCAGCAGAATAACTCCTGTCAGCTCATCCTTGTGGAAAGCATCCCTGAGGACTTGCCATTTGCAGCTGGCAGCCCCACTGCCCAGCCCCTGGCCCAGGCTTGGCTGCAGCTTCTTGACACTGCTCGGGAGAGCGTCCACATT…
ENSMUSG00000054889	Dsp	8.594079467404668e-4	desmoplakin [Source:MGI Symbol;Acc:MGI:109611]	ATGAGCTGCAACGGCGGCTCCCACCCGCGGATCAACACGCTGGGTCGCATGACCCGCGCGGAGTCCGGCCCGGACCTGCGCTACGAGATGACCTACAGCGGTGGCGGCGGCGGGGGCGGCGGGGGCGGCGGCGGGGGCACCAGCAGGACGTTCTACTCCCACTCCCGGCGCTGCACCGTCAACGACCAGAACTCCGACGGCTACTGTCAAACCGGCACCATGTCTAGACATCAGAATCAGAACACCATCCAAGAAATGCTGCAAAATTGCTCAGACTGTCTGATGCGGGCGGAGCTGATCGCGCAGCCGGAACTGAAATTCGGAGAAGGGATGCAGCTGGCATGGAACCGAGAGCTGGATGAGTATTTTACACAAGCCAACGATCAGATGGAAATCATA…
ENSMUSG00000023940	Sgo1	-0.6388638205611815	shugoshin 1 [Source:MGI Symbol;Acc:MGI:1919665]	ATGGCTAAGGAAAGGTGTCAGAAAAGGTCCTTTCAAGATACCCTTGAAGACATTAAGAATCGAATGAAAGAAAAAAGGAATAAAAATTTGGCGGGGATTGGGAAACGCAAGTCCTTTATTGTTGCACCGGGCCAAGTACCCACTAACACTGCTACACTACTGAGATATTACCAAGATAACAACAGGTTGTTAGTCTTGGCTTTGGAAAATGAGAAATCCAAAGTGAGAGAAGCACAGGATGTCATCCTGCAACTGAGAAAAGAATGCTACTACCTTACTTGTCAGCTGTATGCATTGAAAGAGAAGCTAACTTCCCGACAAAGTGAAGAAACTACTCAGAACTGGAAAGGACGTCCCTCAGACGTGGTCTCCAGCATTGACAATACGACCAGGGACTTG…
ENSMUSG00000025137	Pcyt2	0.07230932891974354	phosphate cytidylyltransferase 2, ethanolamine [Source:MGI Symbol;Acc:MGI:1915921]	ATGATCCGGAACGGGCACGGGGCTGCCAGCGCTGCTGGGCTGAAGGGTCCGGGAGATCAGCGCATCGTGCGGGTGTGGTGCGATGGCTGCTATGACATGGTGCATTATGGCCACTCCAACCAGCTACGGCAGGCACGGGCCATGGGGGACTACCTCATCGTGGGTGTGCATACGGATGAGGAGATTGCCAAGCATAAGGGGCCCCCGGTGTTTACCCAGGAGGAGAGGTACAAGATGGTACAGGCCATCAAGTGGGTGGATGAGGTGGTGCCCGCTGCTCCCTACGTCACCACCCTGGAGACACTGGACAAGCACAACTGTGACTTCTGTGTTCACGGCAATGACATCACGCTGACAGTAGACGGCCGAGACACCTATGAGGAAGTGAAGCAGGCTGGG…
ENSMUSG00000028034	Fubp1	0.4087877887486261	far upstream element (FUSE) binding protein 1 [Source:MGI Symbol;Acc:MGI:1196294]	ATGGCCGACTACTCCACAGTGCCTCCGCCGTCGTCTGGCTCGGCTGGCGGCGGCGGCGGCGGAGTCGTTAACGACGCTTTCAAAGATGCCCTGCAGAGAGCGCGGCAGATTGCAGCAAAAATTGGGGGTGATGCTGGTACATCATTGAATTCAAATGACTATGGTTATGGGGGACAAAAAAGACCCTTAGAAGATGGAGATCAGCCAGATGCTAAGAAAGTACCTCCCCAAAATGACTCTTTTGGAGCACAGTTACCTCCAATGCATCAGCAGCAAAGCAGATCTGTAATGACAGAAGAATACAAAGTCCCAGATGGGATGGTCGGATTTATAATTGGCAGAGGAGGTGAACAGATCTCACGAATACAGCAGGAATCTGGATGCAAGATACAGATAGCA…
ENSMUSG00000079536	Ctag2l1	0.06644384621833446	CTAG2 like 1 [Source:MGI Symbol;Acc:MGI:3644285]	ATGCAGAACCCTGTTGAGGGCTTAGATGGGAGAGCAGGGCTTGAAGAAGGTGAGGATAGCCAACTGAGGCCTCAAGCTCCGGATGCCCAGGCTAGCTCTCAAAATTCGGCAACTGAAGGTGACCATGGCAACGTCCCTCAGAGTTGCCCACAAGATTCTGGGAGACCAGCTGCTCCTGGGACCCTGGCTACTCCTGGAAGTCAGGCTGCTCCAGGCAGCCCCAGCCCAGGGAGCACTGTAGGGTCTGGAGCAGCAGCTGAAGAGGCAGCTGTCATTCCTCACAGTGAGCAGGCGACACTTGTCCCTGGGCCCAGCGGTGATGCTGCATCAACTGGAAATCGAAGCCTGGAGTTCTCTGTAACAGTGCCTTTCAGGACTGCAGTGGAGGCAGACATGGCC…
ENSMUSG00000030031	Kbtbd8	-0.0600725522528541	kelch repeat and BTB (POZ) domain containing 8 [Source:MGI Symbol;Acc:MGI:2661430]	ATGGCCGCGTCGGCAGATTTAAGTAAGTCTTCCCCAACACCGAATGGGATTCCATCTTCAGACACAGCCAACGATACCATGGATCCTTTCCATGCTTGCAGTATTCTTAAGCAACTCAAAACAATGTACGATGAAGGACAGTTGACAGACATTGTAGTGGAAGTGGATCACGGGAAAACATTTTCCTGTCATAGAAACGTTCTTGCTGCAATCAGCCCCTACTTCAGATCCATGTTCACTAGCGGCCTTACAGAAAGTACTCAGAAAGAAGTTCGAATCATTGGTGTTGAAGCTGAATCAATGGATTTAGTATTGAATTATGCCTATACCTCTAGAGTTATTCTGACAGAGGCCAATGTTCAAGCCTTGTTCACTACAGCTAGCATCTTCCAAATTCCT…
ENSMUSG00000059256	Gzmd	0.5786472697563138	granzyme D [Source:MGI Symbol;Acc:MGI:109255]	ATGCCACCAATCCTGATTCTCCTGACCCTACTTCTGCCTCTCAGAGCTGGAGCAGAGGAGATCATCGGCGGCCATGTGGTGAAGCCACACTCCCGCCCCTACATGGCATTCGTTATGTCTGTGGATATTAAGGGGAACAGGATATACTGTGGAGGCTTCCTGATTCAAGATGACTTTGTGCTGACGGCTGCTCACTGCAAAAACAGCTCTGTCCAAAGCTCAATGACAGTCACACTGGGGGCCCACAACATCACGGCTAAGGAGGAGACACAGCAGATCATCCCTGTGGCAAAAGACATTCCCCATCCAGATTATAATGCTACTATCTTCTACAGTGACATCATGCTGTTAAAGCTGGAGAGTAAGGCCAAGAGAACTAAAGCTGTGAGACCCCTCAAG…
ENSMUSG00000025858	Get4	0.04737133075201952	golgi to ER traffic protein 4 [Source:MGI Symbol;Acc:MGI:1914854]	ATGGCGGCGGCGGCGGCGATGGCAGAGCAGGAGGGCGCCCGCAACGGCGCCCGCAACCGCGGCGGCGTCCAGCGCGTGGAGGGCAAGCTGCGTGCTAGCGTCGAGAAGGGCGACTACTACGAGGCGCACCAGATGTACCGGACCCTCTTCTTCAGATACATGTCTCAGAGCAAACATGCAGAGGCCCGGGAGCTTATGTACTCAGGAGCATTGCTCTTCTTCAGTCATGGCCAGCAGAACAGTGCAGCTGACCTGTCCATGCTGGTCCTCGAATCCCTGGAAAAGGCCGAGGTGGACGTAGCTGATGAGCTTTTGGAAAATCTGGCTAAAGTGTTCAGTTTGATGGATCCAAATTCTCCTGAACGAGTAGCTTTTGTGTCCAGAGCCCTGAAGTGGTCC…
ENSMUSG00000031210	Gpr165	0.047952016895595945	G protein-coupled receptor 165 [Source:MGI Symbol;Acc:MGI:1923456]	ATGGATGCTCCAACCACAGACGTGCCCCCAGAGGATTTCCAGAGCCCTGGCACCATGGGCTTTGGGGACGAGCTGACTCCAGAAGCTCTGAGTGTACCTAGTGGTTTTGATGACTTGATCACTTCTACCACCTCCCAGGTGCTTCAGGCTGCATCCAATGCTGGCCGCAATGGCATGCTGTCAAAGATGGATAAGTTGGCAGACCACATGTCAAACTCGGGGGACCTGGCTGACACATCGGGTCCCCTAGATTTGGAAATTGTATCCCAGGATGAGCAGGTGCAATTCTGGTTAGTGGTAGGGTACACCATAGTGGTCTTTGCTGCCATCATAGGCAACTGGGTCTTAAACCACATAATTATGAAGTATAAGAGGGTACACACTGCCACCGGCCTCTTC…
ENSMUSG00000045275	Lca5l	-0.5487528138713248	Leber congenital amaurosis 5-like [Source:MGI Symbol;Acc:MGI:3041157]	ATGAGGTTGTGGACTATGTCTTTGGCTGATACAACAGAAGCACACACAAACGAGCATTTCCCCAGTCTGGCACTAGGAAGCAACAAGAAGTCTACAGAAGGCAAGCGTAGCCCTGGCGCTGGTGGCCAGTCCCAGAACAGCCAGGCTTCCAATGGGAGCGTGGATTACAGCAGGTCTCAGTGCTCCTGCACAAGCCTGACTTCTCACTATGACTACTCAGAAGACTTTCTCTCTGACTGCTCTGAGACGGCCGTCAGGAGACTCCAGTCAGAGAAGCCTCTGGCAAAGGCGAAGGAGAAAAGGAAGTACAACGCTGGTAAACTCCCCCAGCCTAGAGGCCAGAAGGACATCCCAGCTGAGAAAAAGCAATTCTGGAATGCTTCGTTGATCAGTTCTCAA…
ENSMUSG00000023952	Gtpbp2	0.0603766047336082	GTP binding protein 2 [Source:MGI Symbol;Acc:MGI:1860138]	ATGGACTCGCGGGTATCGGAGCTGTTCGGCGGCTGCTGCCGGCCCGGAGGAGGCCCGGCCATGGGTGGAAACCTCAAAGCTCGGGGGGCCGGCGGTAGCAGCAGTTGCGGGGGCCCAAAGGGGAAGAAGAAGAACGGAAGGAACAGAGGAGGTAAAGCCAACAACCCTCCGTACCTGCCCCCAGAGGCTGAAGATGGAAACATCGAATATAAACTGAAGCTGGTGAACCCATCTCAGTACCGCTTTGAGCACTTGGTGACACAAATGAAGTGGCGGCTCCAGGAAGGACGTGGTGAGGCTGTCTACCAGATTGGGGTAGAGGACAATGGGCTGCTGGTGGGGCTGGCTGAAGAGGAGATGCGGGCTTCCCTCAAGACCCTGCACCGGATGGCAGAGAAG…
ENSMUSG00000016921	Srsf6	-0.5336689039767818	serine and arginine-rich splicing factor 6 [Source:MGI Symbol;Acc:MGI:1915246]	ATGCCGCGCGTCTACATAGGACGCCTGAGCTACAACGTCCGCGAGAAGGACATCCAGCGCTTTTTCAGCGGCTACGGCCGCCTCCTCGAGATCGACCTCAAAAATGGGTACGGTTTCGTGGAGTTCGAGGACTCCCGGGATGCCGACGATGCCGTGTACGAGCTCAACAGCAAGGAGCTGTGCGGCGAGCGCGTGATCGTAGAGCACGCCCGGGGCCCGCGCCGCGACCGCGATGGCTACAGCTACGGAAGCCGCAGTGGTGGAGGTGGATACAGCAGTCGGAGAACTTCTGGCAGAGACAAATATGGACCACCTGTTCGTACAGAGTACAGGCTTATTGTAGAAAATCTGTCTAGTCGTTGCAGTTGGCAAGACTTAAAGGATTTCATGCGGCAAGCA…
ENSMUSG00000010608	Rbm25	0.05610361300535152	RNA binding motif protein 25 [Source:MGI Symbol;Acc:MGI:1914289]	ATGTCTTTCCCCCCTCATTTGAATCGCCCTCCCATGGGAATCCCAGCTCTCCCTCCAGGGATCCCACCCCCACAGTTTCCTGGCTTTCCTCCACCAGTACCTCCAGGGACACCGATGATTCCTGTACCAATGAGTATTATGGCTCCTGCTCCAACTGTCCTAGTACCTACCGTGTCCATGGTTGGAAAGCATTTGGGAGCCAGAAAGGATCATCCAGGCTTAAAATTAAAAGAAAATGATGAAAATTGTGGCCCTACTACTACAGTTTTTGTTGGGAACATTTCTGAGAAGGCTTCAGACATGCTTATACGACAGCTCTTAGCTAAATGTGGTTTGGTGTTGAGCTGGAAGAGAGTGCAAGGTGCTTCTGGGAAACTTCAAGCTTTTGGATTTTGTGAG…
ENSMUSG00000024039	Cbs	0.5418029867648505	cystathionine beta-synthase [Source:MGI Symbol;Acc:MGI:88285]	ATGCCTTCAGGGACATCCCAGTGTGAAGATGGCTCTGCTGGGGGCTTCCAGCACTTGGACATGCACTCAGAAAAGAGACAACTGGAGAAGGGCCCCTCAGGGGACAAGGATCGAGTCTGGATCCGGCCTGATACCCCAAGCAGATGTACCTGGCAGCTGGGCAGGGCCATGGCGGACTCCCCACATTATCACACAGTGCTGACCAAATCCCCCAAAATTTTACCAGATATTCTGAGGAAAATTGGGAACACCCCTATGGTCAGAATCAACAAGATCTCAAAGAATGCCGGTCTCAAGTGTGAGCTCTTGGCCAAGTGTGAGTTCTTCAATGCGGGTGGGAGTGTGAAGGACCGCATCAGCCTTCGGATGATCGAAGATGCTGAGCGAGCTGGAAACTTG…
ENSMUSG00000091450	Vmn2r11	-0.12142836307668733	vomeronasal 2, receptor 11 [Source:MGI Symbol;Acc:MGI:3643806]	ATGAAGAAGCTGCGTACTTTCACTATTTCCTTTTGGCTCCTGAAGTTTTCTCTCATCTTGTGCCATGTAACTGAACCCATTTGTTTTTGGAGGATAAAGAATAATAAAGATAATGATGGAGATTTAAGAAGTGACTGTAATTATTTCCTTTGGACATTCGAGGAAACTACAGAAATCAATTTTTATAATATTGTTGATTTTAGAATACCTACAAGAAGATATGAGTTCTTTCTGGTATTGTTTTTTGCTACTGATGAAATCAACAAGAATCCTGATCTTTTACCCAACATATCTCTGATATTCTGGCTTTTTGGTGGTCAGTGTGAAGATGAATGGGGAGTTCTGGATACAAATTATTCACAAAACAATATTAATGTGAAATTTATTAATTATGACTGT…
ENSMUSG00000039621	Prex1	-0.03944523471158731	phosphatidylinositol-3,4,5-trisphosphate-dependent Rac exchange factor 1 [Source:MGI Symbol;Acc:MGI:3040696]	ATGGAGGCACCCGGCAGCGGTGGTGGTGACGGCGGCGGGGACCCAGGCGGGGACGGTGCGCATCCCGATGCTCGCGGCCCCGTCTCCGGGCCGTGCGCGGCCGCCCGCGACTCGGAGCGCCAGCTGCGCCTCCGTCTGTGCGTACTCAACGAGATCCTGGGCACCGAGCGCGACTACGTGGGCACCTTGCGTTTCCTGCAGTCGGCCTTCCTACAGCGGATCCGGCAGAATGTGGCCGACTCTGTGGAGAAGGGCCTCACAGAAGAGAATGTCAAGGTCCTCTTCTCCAACATTGAGGACATCCTGGAAGTCCATAAGGATTTTCTGGCTGCCCTGGAGTACTGCTTACACCCCGAGCCTCAGTCTCAGCACGAACTTGGGAATGTTTTCTTGAAATTT…
ENSMUSG00000026630	Batf3	-0.5450037684753183	basic leucine zipper transcription factor, ATF-like 3 [Source:MGI Symbol;Acc:MGI:1925491]	ATGTCGCAAGGGCCCCCCGCGGTCAGCGTGCTGCAGAGAAGCGTGGATGCGCCCGGGAACCAGCCGCAGAGCCCCAAGGACGATGACAGGAAAGTTCGAAGGAGAGAGAAAAACCGGGTTGCAGCTCAGAGGAGCCGGAAGAAGCAGACCCAGAAGGCTGACAAGCTCCACGAGGAGCACGAGAGCCTGGAGCAGGAGAACTCTGTGCTGCGCAGGGAGATTTCGAAGCTGAAGGAGGAGCTGCGTCACCTGAGCGAGGTGCTGAAGGAGCACGAGAAGATGTGCCCGCTGCTGCTGTGTCCTATGAACTTTGTGCAGCTTCGGTCAGACCCCGTGGCCAGCTGTCTACCACGATGA
ENSMUSG00000026751	Nr5a1	-0.2325583314051408	nuclear receptor subfamily 5, group A, member 1 [Source:MGI Symbol;Acc:MGI:1346833]	ATGGACTATTCGTACGACGAGGACCTGGACGAGCTGTGTCCAGTGTGTGGTGACAAGGTGTCGGGCTACCACTACGGGCTGCTCACGTGCGAGAGCTGCAAGGGCTTCTTCAAGCGCACAGTCCAGAACAACAAGCATTACACGTGCACCGAGAGTCAGAGCTGCAAAATCGACAAGACGCAGCGTAAGCGCTGTCCCTTCTGCCGCTTCCAGAAGTGCCTGACGGTGGGCATGCGCCTGGAAGCTGTGCGTGCTGATCGAATGCGGGGTGGCCGGAACAAGTTTGGGCCCATGTACAAGAGAGACCGGGCCTTGAAGCAGCAGAAGAAAGCACAGATTCGGGCCAATGGCTTCAAGCTGGAGACCGGACCACCGATGGGGGTGCCCCCGCCACCCCCT…
ENSMUSG00000020846	Rflnb	0.015105449076146995	refilin B [Source:MGI Symbol;Acc:MGI:1923816]	ATGGTGGGCCGGCTGAGCCTGCAGGATGTCCCTGAACTCGTGGACACGAAGAAAAAAGGCGACGGCGTCCTGGACAGCCCGGACTCGGGGCTGCCCCCAAGCCCTAGCCCCAGCCACTGGGGGCTCGCAGCGACGGCGGGCGGCGGTGGGGAGCGCGCTCCGGTCGCAGGGACGCTGGAGCCCGATGCGGCGGTGACCCCTATAGTCCCGAACCCAGCATCTCTGACCCACTCGCTAGCTGCCATCTGCTCACCGAGACTCTGTCCCCTGTCCTTCGGCGAAGGAGTTGAGTTTGACCCCTTGCCACCAAAGGAAATAAAGTATACCTCCTCAGTCAAGTATGACTCTGAGCGGCACTTCATCGATGATGTACAGATGCCCCTGGGTCTGGTGGTGGCT…
ENSMUSG00000041459	Tardbp	0.10760559834270547	TAR DNA binding protein [Source:MGI Symbol;Acc:MGI:2387629]	ATGTCTGAATATATTCGGGTAACAGAAGATGAGAACGATGAACCCATTGAAATACCATCAGAAGACGATGGGACGGTGTTGCTGTCCACAGTTACAGCCCAGTTTCCAGGGGCATGCGGCCTGCGCTACCGGAATCCCGTGTCTCAGTGTATGAGAGGAGTCCGACTGGTGGAAGGAATTCTGCATGCCCCAGATGCTGGCTGGGGCAATCTGGTATATGTTGTCAACTATCCCAAAGATAACAAAAGGAAAATGGATGAGACAGATGCTTCCTCTGCAGTGAAAGTGAAAAGAGCAGTCCAGAAAACATCTGACCTCATAGTGTTGGGTCTCCCCTGGAAAACAACTGAGCAGGATCTGAAAGACTATTTCAGTACTTTTGGAGAGGTTCTTATGGTT…
ENSMUSG00000068877	Selenbp2	0.19410826231126646	selenium binding protein 2 [Source:MGI Symbol;Acc:MGI:104859]	ATGGCTACAAAATGCACAAAGTGTGGTCCAGGTTACCCCACCCCTCTGGAGGCCATGAAAGGACCCCGAGAGGAGATTGTCTACTTGCCCTGCATTTACCGGAACACAGGCACCGAAGCCCCGGATTATTTGGCCACTGTGGATGTAGACCCTAAGTCTCCCCAGTATAGCCAGGTCATCCACAGGTTGCCCATGCCCTACCTGAAGGACGAGCTGCACCACTCAGGATGGAACACCTGCAGCAGCTGCTTTGGGGACAGCACGAAGTCACGCAACAAGCTGATACTGCCTGGTCTCATGTCCTCCCGCATCTACGTGGTGGATGTGGGCTCTGAGCCTCGTGCCCCGAAGTTGCACAAGGTCATTGAAGCCAGTGAAATCCAAGCCAAGTGCAACGTG…
ENSMUSG00000006219	Fblim1	-0.2184676180099446	filamin binding LIM protein 1 [Source:MGI Symbol;Acc:MGI:1921452]	ATGGCCTCCAAGCCTGAGAAAAGGGTGGCCTCCTCTGTCTTCATCACCCTGGCACCGCCACGCCGAGATGTAGCCGTGAGTGAGGAAGTGGGCCAGGCAGCTTGTGAAGCCAGACGCGCTCGGCCCTGGGAGATGCTTCCCACAAAGACACCTGGGGCCGCAGTGGGCAGGAGCCCCAAGACCTGGACGCCCTCTGGCAAGACCAATGCCTCACTCTCTGGAGTCACACCTCAGCTCTCCAATGGAGGATGCTCTCTCCCACCTCCTTCCCTGAATGAGGAGGACCTAGACCTCCCGCCTCCTCCACCGCCCCCTTCTGCCTACCTGCCTCTCCCAGAAGAGGAGCCTCCTGTCTTACCAGGGAAGTCGCTCATTTCCGACTTGGAGCAACTGCACCTG…
ENSMUSG00000030050	Gkn1	0.5946253960630704	gastrokine 1 [Source:MGI Symbol;Acc:MGI:1913533]	ATGAAGCTCACAATGTTCGTCGTGGGTCTGCTTGGCCTCCTTGCAGCTCCTGGTTTTGCTTACACGGTCAACATCAATGGTAATGATGGCAATGTAGACGGAAGTGGACAGCAGTCGGTGAGCATCAATGGTGTGCACAACGTGGCCAATATCGACAACAATAACGGCTGGGACTCCTGGAATAGCCTCTGGGACTATGAAAACAGTTTCGCTGCCACGAGACTCTTCTCCAAGAAGTCATGCATTGTGCACAGAATGAACAAGGATGCCATGCCCTCCCTTCAGGACCTCGATACAATGGTCAAGGAACAGAAGGGTAAAGGGCCTGGAGGAGCTCCTCCCAAGGACTTGATGTACTCCGTCAACCCTACCAGAGTGGAGGACCTGAATACATTCGGA…
ENSMUSG00000074647	Fam83c	-0.5407401237259658	family with sequence similarity 83, member C [Source:MGI Symbol;Acc:MGI:1918655]	ATGCAGGGCTGCCAAGCTGGCGCCAGTATCTTCTTCCTTATAGCAGCCAACCCAGATGCAAACCATGGAGCCTCGGGTGGGTTGGGCTCTAGGTGGATACGCACATTTAGCCGAATAGCACCCGCTGGGACCCAGGGCATGGCAGGACCCCTGCGGAGCCGGGTGGAGGAGCTGAAGCGGCCCTGGTGGAGGGAGAGCTCACCCCTGGTGCTCCAGCACAGCGAGGCTGCAAGACTGGCGGCAGATGCCCTCCTGGAACGGGGAGAGGCTGCCTACCTTCAGGTCATCTCCGAAGAGCGGGAGCTGCCCTTCCTGAGTGCCCTGGACGTGGACTACATGATCAGCCATGTGCGTGGGGTTCCTGAGCTCAGCGAGGCCCAGGGGTCAGAGACCTTAGGC…
ENSMUSG00000020357	Flt4	-0.22526821568609864	FMS-like tyrosine kinase 4 [Source:MGI Symbol;Acc:MGI:95561]	ATGCAGCCGGGCGCTGCGCTGAACCTGCGCCTGTGGCTCTGCCTCGGACTCCTCCAAGGCCTGGCAAATGGTTACTCCATGACCCCTCCAACCCTGAACATCACAGAGGATTCATATGTGATTGACACCGGGGACAGCCTATCCATATCCTGCAGGGGACAGCACCCCCTCGAGTGGACCTGGCCAGGGGCCCAGGAGGTACTGACCACAGGTGGGAAGGACAGTGAAGACACACGGGTTGTGCATGACTGTGAAGGCACAGAAGCTAGGCCCTACTGCAAGGTGCTACTGCTGGCCCAGACTCACGCCAACAACACGGGCAGCTACCACTGCTACTACAAGTACATCAAGGCCCGGATTGAGGGCACCACAGCTGCCAGCACCTATGTGTTTGTAAGA…
ENSMUSG00000020211	Sf3a2	-0.3237379699861901	splicing factor 3a, subunit 2 [Source:MGI Symbol;Acc:MGI:104912]	ATGGACTTTCAGCACAGACCTGGAGGCAAGACTGGGAGTGGGGGCGTAGCCTCCTCCTCTGAGAGCAACCGGGATCGGAGAGAGCGTCTGCGCCAATTGGCCCTGGAAACCATTGACATCAACAAGGACCCGTATTTTATGAAGAACCACTTGGGATCCTATGAGTGCAAACTCTGCCTGACTCTGCATAACAATGAGGGGAGCTACCTGGCCCATACCCAAGGGAAGAAACATCAGACTAACTTGGCCCGGCGAGCTGCCAAGGAGGCCAAAGAAGCCCCCGCCCAGCCTGCACCGGAGAAGGTCAAGGTGGAGGTGAAGAAGTTTGTGAAGATTGGCCGCCCTGGGTACAAAGTGACCAAGCAGAGGGACACAGAGATGGGCCAGCAGAGCCTGCTG…
ENSMUSG00000054733	Msra	0.17781777015332836	methionine sulfoxide reductase A [Source:MGI Symbol;Acc:MGI:106916]	ATGCTCTCCGCCTCTAGAAGGGCTCTCCAGCTCCTCTCTAGCGCCAACCCGGTACGGAGGATGGGCGACTCAGCTTCGAAAGTCATCTCCGCAGAGGAAGCCTTGCCGGGACGCACCGAGCCGATCCCTGTAACAGCCAAACACCATGTCAGTGGCAACAGAACGGTTGAACCTTTCCCAGAGGGAACACAGATGGCTGTATTTGGAATGGGCTGCTTCTGGGGAGCTGAGCGCAAGTTCTGGGTCTTGAAAGGAGTGTACTCAACCCAAGTGGGCTTTGCAGGAGGCCACACACGCAATCCCACCTACAAAGAGGTCTGCTCAGAAAAAACTGGCCACGCCGAAGTCGTCCGGGTTGTGTACCGGCCAGAGCACATCAGCTTTGAGGAACTGCTCAAG…
ENSMUSG00000036104	Rab3gap1	-0.06401966619510543	RAB3 GTPase activating protein subunit 1 [Source:MGI Symbol;Acc:MGI:2445001]	ATGGCGGCGGACAGTGAGCCCGAGTCCGAAGTGTTTGAGATCACAGACTTCACCACAGCCTCGGAGTGGGAGAGGTTTATTTCCAAAGTTGAAGAAGTCTTGAATGACTGGAAACTGATTGGACCCTCTCTGGGAAAGCCACTGGAAAAGGGTATATTTACTTCTGGCACATGGGAAGAGCGATCAGATGAAATTTCCTTTGCTGACTTCAGGTTTTCAGTCACACATCACTATCTTGTACAAGAGTCTCCTGATAAAGAAAGAAAGGATGAAGAATTGGAGGACGCTATTCCACAGTCAATGCAAGATTTGCTATGTATGAATAACGACTTTCCTCCAAGAGCACATTGCCTGGTAAGATGGTATGGCCTGCGTGAGTTTGTGGTGATTGCTCCTGCT…
ENSMUSG00000031885	Cbfb	-0.08200712109687744	core binding factor beta [Source:MGI Symbol;Acc:MGI:99851]	ATGCCGCGCGTCGTCCCGGACCAGAGGAGCAAGTTCGAGAACGAGGAGTTCTTCAGGAAGCTGAGCCGCGAGTGCGAGATTAAGTACACGGGCTTCAGGGACCGGCCCCACGAGGAGCGCCAGACACGCTTCCAGAACGCCTGCCGCGACGGTCGCTCGGAGATCGCTTTTGTGGCTACAGGAACCAATCTGTCTCTCCAGTTTTTTCCGGCCAGCTGGCAGGGAGAACAGCGACAAACACCTAGCCGGGAATATGTCGACTTAGAGAGAGAAGCAGGCAAGGTATACTTGAAGGCTCCCATGATTCTGAATGGAGTGTGTGTTATATGGAAGGGCTGGATTGATCTCCACAGATTGGATGGTATGGGTTGCCTGGAGTTTGATGAGGAGCGAGCCCAG…
ENSMUSG00000074259	Gramd2	-0.23957161243489064	GRAM domain containing 2 [Source:MGI Symbol;Acc:MGI:3528937]	ATGCAAATGAAGATGATGTTTTTCTGCCTATCAGATTGGCAGAGCAACCAACAAATGCACGGGAAGATGGCACCTCTGAAGAGCCATGTGCCCTGCACGGAGAAACCAGGAAAGGTCCAGGAGCCTCCAGATGATGGCAGTCTGCACTGGTCAGAAGGCTCAAAGGGTGAAGACATAAAGAAGTATAGCCGGGAAGGGACACTACGGAGCAAATACAACCAACAATACCACAAGCTGTTTAAAGATATCCCGTTGGAGGAGGTGGTCCTCAAAGTGTGTTCCTGTGCCCTCCAGAGAGACCTCCTTCTCCATGGTCGGCTCTATATCTCTCCCAACTGGCTTTGCTTCCATGCCAGCCTCTTTGGCAAGGATATCAAGGTGGTCATTCCTGTGGTATCT…
ENSMUSG00000032085	Tagln	0.47187723256692615	transgelin [Source:MGI Symbol;Acc:MGI:106012]	ATGGCCAACAAGGGTCCATCCTACGGCATGAGCCGAGAAGTGCAGTCCAAAATTGAGAAGAAGTATGACGAGGAGCTGGAGGAGCGACTAGTGGAGTGGATTGTAGTGCAGTGTGGCCCTGATGTAGGCCGCCCAGATCGTGGGCGCCTGGGCTTCCAGGTGTGGCTGAAGAATGGTGTGATTCTGAGCAAATTGGTGAACAGCCTGTATCCTGAGGGATCGAAGCCAGTGAAGGTGCCTGAGAACCCACCCTCCATGGTCTTTAAGCAGATGGAACAGGTGGCTCAATTCTTGAAGGCAGCTGAAGATTATGGAGTCATCAAGACTGACATGTTCCAGACTGTTGACCTCTATGAAGGTAAGGATATGGCAGCAGTGCAGAGGACTCTAATGGCTTTG…
ENSMUSG00000027613	Eif6	-0.001166911801819024	eukaryotic translation initiation factor 6 [Source:MGI Symbol;Acc:MGI:1196288]	ATGGCGGTCAGAGCGTCGTTCGAGAACAACTGTGAGGTCGGTTGTTTTGCCAAACTCACAAACGCCTACTGCCTGGTGGCCATCGGAGGCTCAGAGAACTTCTATAGTGTGTTCGAGGGTGAGCTCTCCGATGCCATTCCCGTGGTGCACGCATCCATCGCCGGCTGCCGAATCATCGGGCGCATGTGTGTGGGGAACAGGCATGGGCTCCTGGTACCCAACAACACCACCGACCAGGAGCTGCAGCACATCCGCAACAGCCTGCCTGACTCCGTGCAGATACGGCGGGTGGAGGAGCGGCTCTCGGCCCTTGGCAATGTCACCACCTGCAATGACTATGTGGCCTTGGTCCACCCAGACTTGGACAGGGAGACAGAAGAGATCCTGGCTGATGTCCTC…
ENSMUSG00000049672	Zbtb14	-0.27135783851131345	zinc finger and BTB domain containing 14 [Source:MGI Symbol;Acc:MGI:1195345]	ATGGAGTTTTTCATCAGTATGTCTGAAACCATAAAATATAATGATGATGATCATAAAACGCTGTTTCTGAAAACACTGAACGAACAGCGCCTGGAGGGAGAATTCTGCGACATCGCCATCGTGGTTGAAGATGTAAAGTTCCGAGCCCACCGGTGTGTCCTCGCCGCCTGCAGCACGTACTTTAAGAAGCTTTTCAAGAAGCTAGAAGTAGACAGCTCGTCCGTCATAGAGATAGATTTCCTCCGCTCTGACATATTTGAAGAGGTGCTGAACTACATGTACACCGCCAAGATTTCCGTGAAAAAGGAGGACGTCAACTTGATGATGTCGTCCGGGCAGATTCTCGGTATCCGGTTTTTGGATAAACTGTGTTCTCAGAAGCGCGATGTGTCTAGTCCG…
ENSMUSG00000066842	Hmcn1	-0.1610187005044393	hemicentin 1 [Source:MGI Symbol;Acc:MGI:2685047]	ATGATTGCCCAGGAAGTGGTCCACACAGTATTCCTGGTGGCTCTTTTTCGTTCTTCCCTAGCTGGAGATGGGACTCCGCAGTCTGAGAGCAGGGCTGAGGAGATTCCTGAGGGGGCGTCCACGCTGGCTTTTGTGTTTGATGTGACTGGGTCCATGTATGATGATTTAGTTCAGGTTATTGAAGGGGCTTCCAAAATTTTGGAGACGTCTTTGAAAAGACCTAAGAGACCTCTTTACAACTTTGCTTTGGTGCCCTTCCATGATCCAGAAATTGGTCCAGTGACAATTACCACAGATCCAAAAAAATTTCAGTATGAATTGAGAGAACTGTATGTTCAGGGAGGTGGTGACTGTCCAGAAATGAGCATCGGGGCTATAAAGATTGCCTTGGAAATCTCT…
ENSMUSG00000021583	Erap1	0.06184059241369458	endoplasmic reticulum aminopeptidase 1 [Source:MGI Symbol;Acc:MGI:1933403]	ATGCCCTCTCTTCTTCCCCTAGTATTGACATTTTTATCTGTGTCATCTCCTTCTTGGTGTCAGAACAGTGATATAGAATCTCTAAAAGCTAGTAATGGAGACTCATTCCCTTGGAATAATATGCGACTTCCTGAGTATATGACCCCGATTCATTATGATCTCATGATCCATGCAAACCTCAGCACTCTGACTTTCTGGGGAAAAACAGAAGTAGAAATCATAGCTAGCCGGCCCACCAGCACCATTATTATGCATAGTCACCACCTGCAAATATCTAAGGCCACCCTCAGAAGAGGAGCTGGAGAGATGCTGTCTGAAGAACCACTGAAGGTCCTGGAATATCCTGCTCATGAGCAAGTTGCACTGCTGGCTGCCCAGCCGCTTCTTGCTGGGTCCCTG…
ENSMUSG00000032745	Gpbp1	-0.427663276578225	GC-rich promoter binding protein 1 [Source:MGI Symbol;Acc:MGI:1920524]	ATGGCGCAGCATGACTTTGCTCCAGCCTGGCTTAATTTTCCTACTCCTCCATCATCAACAAAGTCATCATTGAATTTTGAGAAGCACTCTGAAAATTTTTCATGGACAGAAAATCGTTATGATGTGAGTCGTCGACGACACAATTCTTCAGATGGCTTTGATTCTGGTATTGGACGTCCTAATGGAGGTAATTTTGGGAGGAAAGAGAAAAATGGATGGCGTACGCATGGCAGAAATGGTACAGAAAACATAAATCATCGTGGGGGATACCATGGTGGAAATTCCCGTTCTCGTAGCAGTATTTTCCATTCTGGAAAAAGCCAAGGACTACATGAAAACAGCATCCCTGACAATGAAACTGGGAGGAAAGAAGACAAAAGAGAACGCAGACAGTTTGAG…
ENSMUSG00000032086	Bace1	0.11957684902979962	beta-site APP cleaving enzyme 1 [Source:MGI Symbol;Acc:MGI:1346542]	ATGGCCCCAGCGCTGCACTGGCTCCTGCTATGGGTGGGCTCGGGAATGCTGCCTGCCCAGGGAACCCATCTCGGCATCCGGCTGCCCCTTCGCAGCGGCCTGGCAGGGCCACCCCTGGGCCTGAGGCTGCCCCGGGAGACCGACGAGGAATCGGAGGAGCCTGGCCGGAGAGGCAGCTTTGTGGAGATGGTGGACAACCTGAGGGGAAAGTCCGGCCAGGGCTACTATGTGGAGATGACCGTAGGCAGCCCCCCACAGACGCTCAACATCCTGGTGGACACGGGCAGTAGTAACTTTGCAGTGGGGGCTGCCCCACACCCTTTCCTGCATCGCTACTACCAGAGGCAGCTGTCCAGCACATATCGAGACCTCCGAAAGGGTGTGTATGTGCCCTACACC…
ENSMUSG00000035278	Plekhj1	0.033758609630194863	pleckstrin homology domain containing, family J member 1 [Source:MGI Symbol;Acc:MGI:1925920]	ATGCGGTACAACGAGAAAGAGTTGCAGGCGCTGTCCCGACAGCCGGCAGAGATGGCGGCCGAGCTGGGCATGCGGGGCCCCAAGAAGGGCAGCGTGGCCAAGCGGCGACTGGTGAAGCTGGTGGTCAACTTCCTCTTTTACTTCCGCCCGGACGAGGCCGAGCCCCTCGGAGCCCTGTTGCTGGAGCGCTGCAGAGTGGCCCAGGAAGAACCGGGCGGCTTCTCCATCAGCTTCGTCGAAGACCTCAGCAGGAAATATCACTTTGAATGCTGTAGCCAAGAGCAGTGTCAGGACTGGATGGAAGCTCTGCAGCGGGCCAGCTACGAATACATGCGACAGAGCCTCATCTTCTACAGGAATGAGATCAGGAAGATGACTGGCAAGGACCCCCTGGAGCAG…
ENSMUSG00000093865	Lrit3	-0.5962867928823771	leucine-rich repeat, immunoglobulin-like and transmembrane domains 3 [Source:MGI Symbol;Acc:MGI:2685267]	ATGTGGCTCTCGGCCTGCCTGTGCCTTGTGCTTAGCTTCCTGGGAGGAGTGAACGGTACCTGCCCTTCTCAGTGCTCCTGTGAGTATCACGGCAGACATGACGGCTCAGGATCAAGGTTAGTGTTGTGTAACGACCTGGATATGAACGAAGTCCCAGCAAACTTCCCCGTGGACACCTCGAAGCTTCGCATAGAGAAGACTGTGGTCCGCAGGCTCCCCGCCGAGGCCTTCTACTACCTGGTGGAGCTGCAGTACCTCTGGCTGGCTTACAACTCAGTGGCCAGCATAGAAACCAGTAGCTTCTATAACCTGAGGCAGCTGCACGAGTTGCGTTTGGATGGGAATTCTCTGACCGCTTTCCCTTGGGTGTCTCTGCTGGACATGCCCCACCTGAGGACG…
ENSMUSG00000050982	Apol10a	0.3157682683012104	apolipoprotein L 10A [Source:MGI Symbol;Acc:MGI:3036238]	ATGGATTGGAATGAGATCTTAGAGGACATTAGGAAAGTGGAACGTCGCATTGTTGAAAAATTCATTGAAGATCTCACAGAAAATTTCTTAAGAACAGATCTGAGGAGCCTTATAACTGAAGATGGAGCCTGGAATGGATTTTTGGAAACAGCAGAGTTGTCAAGTGAGGAGAAAGCTGCACTGCGTGATGCTCTGAAGGAGAGTTCAGCACAGAAGCCCTCTGGTGAAAATGACAGACCTGAAAGGAAGCCACAGAAAGAGCAGATTTTGCGAGAGGTTCCTCAGTTGAAGAAGAAACTTGAGGTCCATATCAGTAAGCTCCGAGAGCTGGCTGACAAACTTGACCTGGTGCACAAGTGCTGCACCATCTCCAATGTGGTGTCCCTCACTCTTAGTGCT…
ENSMUSG00000049538	Adamts16	-0.5350425446001869	a disintegrin-like and metallopeptidase (reprolysin type) with thrombospondin type 1 motif, 16 [Source:MGI Symbol;Acc:MGI:2429637]	ATGGAGTCCCGAGGTTGTGCTGCGCTCTGGGTGCTGCTGCTGGCGCAGGTCAGTGAGCAGCAGACACCTGCGTGCGCCCTGGGACTCGCAGCTGCAGCGTCTGGGAGCCCGGAAGACCCGCAGCCTCCCCCATTCTCTGGGTCCAGCTGGCTGGAAACCGGTGAGTATGACCTGGTGTCTGCCTATGAAGTAGACCACAGGGGGGATTATGTATCCCATGACATCATGCACTACCAGCGGAGGCGTCGGAGAAGAGCTGTGACCCAGCCAGGAGGAGATGCCCTGCACCTAAGGCTTAAGGGCCCTAGGCATGACCTCCACCTCGACCTCAAAGCTGCCAGCAACTTGATGGCTCCTGGATTCATGGTGCAAACTCTGGGGAAGGGAGGCACCAAGTCT…
ENSMUSG00000024728	Ms4a19	-0.07017948962481188	membrane-spanning 4-domains, subfamily A, member 19 [Source:MGI Symbol;Acc:MGI:1916666]	ATGAATATGCCACAGAATCGTTTGTGGATAAAAAAGGAACTGAGAGTCTTGGGGTTTAGCCTATCAGGAAGTTTATCAATAATACTACAGAAGAGGCCTTCAAATCATACGCTGATCTGGACCATGACAATGAATATCCTAAGCATCTTCGCAACACTAGTTGGTTTGTTTTTAACAACAGTCGAAATGATAGTGACTTCAAGTGTATATTCTACCCTGTGGCAATATAAGAGTGGCAGGGTGCTTACAGAATATCTGTTCCTGTTCAGCATGTTGGAGTTGTTCATGGCATCCATAGTAACTGAGTGGACCTATAGAGCAAGACAAATAGAATAA
ENSMUSG00000009035	Tmem184b	0.1494668024977678	transmembrane protein 184b [Source:MGI Symbol;Acc:MGI:2445179]	ATGACAGTGAGGGGGGCCGCGCTGGCCCCAGACCCAGCGTCACCCACAACCACAACAGCTTCACCTAGCGTCTCTGCCACCCCCGAGGGCAGCCCCACAGCCATGGAGCACCCTGTGTTCCTGATGACCACTGCCGCCCAGGCCATCTCCGGCTTCTTTGTGTGGACAGCTCTGCTCATCACTTGCCACCAGATCTACATGCATCTGCGCTGCTACAGCCGTCCCAATGAGCAGCGCCACATCGTGCGCATCCTCTTCATCGTGCCCATCTACGCCTTCGACTCCTGGCTCAGCCTCCTCTTCTTCACCAATGACCAGTACTACGTGTACTTCGGCACCGTCCGAGACTGCTATGAGGCCTTTGTCATCTATAACTTCCTGAGCTTGTGCTATGAGTAC…
ENSMUSG00000051674	Dcun1d4	-0.3842915243131423	DCN1, defective in cullin neddylation 1, domain containing 4 (S. cerevisiae) [Source:MGI Symbol;Acc:MGI:2140972]	ATGGAGTTTACCCAAGAGCAGCAAGCCTGTCGTCCACAACGGTCTGAGGAAATGAGACATTGGAAAGACTTTCAGCTGAACTCTCATCTCTCAACACTGGCAAGCATTCATAAGATCTACCATACCCTTAACAAGCTGAATCTGACAGAAGACGTTGGCCAAGACGATCACCAAACAGGAAGCCTGCGCTCTTGCAGTTCTTCGGACTGCTTTAGCAAAGTGATGCCACCCAGGAAAAAGAGAAGACCTGCCTCTGGAGACGACTTATCTGCAAAAAAAAGCAGGCATGACAGCATGTATAGGAAATACGAGTCAACTAGAATAAAGACTGAAGAAGAGGCTTTCTCCAGTAAGCGGTGCCTGGAGTGGTTTTATGAATATGCAGGAACTGAGGATGCC…
ENSMUSG00000005687	Bcas2	0.03766142982205914	breast carcinoma amplified sequence 2 [Source:MGI Symbol;Acc:MGI:1915433]	ATGGCGGGCACGGGCTTGGTAGCCGGAGAGGTGGTGGTAGATGCGCTACCATATTTTGACCAAGGCTATGAGGCACCCGGCGTGCGGGAAGCGGCGGCGGCCCTGGTGGAGGAGGAGACGCGCAGATACCGACCTACCAAGAACTACCTGAGCTACCTGACGGCCCCGGATTATTCTGCCTTTGAAACAGACATAATGAGAAATGAATTTGAAAGACTCGCTGCTCGACAACCGATTGAATTACTCAGCATGAAACGATATGAACTTCCAGCCCCTTCCTCAGGTCAAAAAAATGACATTACTGCATGGCAAGAATGTGTAAACAATTCTATGGCTCAGTTGGAGCACCAGGCGGTCCGGATCGAGAATCTGGAGCTGATGTCACAGCATGGATGCAAT…
ENSMUSG00000073771	Btbd19	-0.48845966327627355	BTB (POZ) domain containing 19 [Source:MGI Symbol;Acc:MGI:1925861]	ATGGAGAACCCAGGACTGGTGGTACGTGGGCAGGCTGCACCCTTTTCCACAGCACTTCGAAGCCTCATCAACAACCCCCAGTACAGTGATATTTGCTTTGTGGTTGGTCAAGAACGGCAAGAGGTATTTGCCCACCGGTGCTTGTTGGCCTGTAGATGTAACTTCTTCCAGAGACTTTTGGGCCCTGGGGTACCTAGTCCTGTGGTGCTAAGCACTGTGCCTGCCGAAGCCTTCTTAGCTGTGCTGGAGTTCCTATACACCAACAGTGTCAAGCTGCACCAACACTCTGTGCTGGAGGTGCTGACAACAGCTGTGGAATATGGGCTGGAGGAACTTCGAGAGCTCTGCCTGGAGTTTGTGGTGAAGGTGTTGGATGTGGAGCTGGTCTGTGAGGCTCTG…
ENSMUSG00000038679	Trps1	-0.8718453683519932	transcriptional repressor GATA binding 1 [Source:MGI Symbol;Acc:MGI:1927616]	ATGCAGAGTAATATGGTCCGGAAAAAGAACCCCCCTCTGAGAAACGTTGCTAGTGAAGGCGAGGGTCAAACCCTGGAGCCAACAGCTACAGAGAGCAAGGTATCTGGGAAGAACAAAGAATTGTCTGCAGATCAGATGTCAGAAAATACAGATCAGAGTGATGTTGCAGAGTTGAACTCGAAGGAGGAACACAGCACGCATGGCCAAGAGCCATCTTCCAGCGGTAAGAAGGACTTGCAAATCTCAGGCCTGAGTGAGAAGGCTGGCTTCAATTATGAAAGCCCCAGTAAGGGAGGGAGCCTTGTCTCCTTCCCACATGATGAGGTAACAGACAGAAATATGTTGGCTTTCTCATCTCCAGCTGCTGGGGGAGTCTGCGAGCCCTTGAAGTCTCCTCAA…
ENSMUSG00000019433	Gipc1	0.37707970869939555	GIPC PDZ domain containing family, member 1 [Source:MGI Symbol;Acc:MGI:1926252]	ATGCCACTGGGACTGGGGCGAAGGAAGAAAGCACCGCCTCTGGTGGAAAATGAGGAGGCGGAGCCAAGCCGGAGTGGGCTGGGTGTTGGGGAGCCTGGGCCCCTGGGTGGGAGCGCAGCAGGAGAATCCCAGATGGGCTTGCCCCCACCTCCTGCTGCCCTCCGGCCTCGCCTCGTGTTCCATACCCAGCTGGCCCACGGCAGCCCCACAGGCCGCATCGAGGGCTTCACTAATGTCAAGGAGCTGTACGGCAAGATCGCTGAGGCCTTCCGACTACCAGCTGCTGAGGTGATGTTCTGCACCCTCAACACCCACAAAGTGGACATGGACAAACTCCTGGGGGGCCAGATCGGCCTGGAAGACTTCATCTTTGCCCATGTGAAGGGGCAGCGCAAAGAG…
ENSMUSG00000026535	Ifi202b	-0.06333534677506156	interferon activated gene 202B [Source:MGI Symbol;Acc:MGI:1347083]	ATGTCCAACCGTAACTTAAGGTCATCTACCAACTCAGAATTTTCTGAGGGTCAACATCAGACCCCTTCCAGTGATTCATCTGGCCATGGGGAGGATCAACCTCAAGCCTCTCCTGGACCTAACAAAAAGTCACACACCCCAAAAAAGAACATTAGCAAAGGTGCTGTTCTTCATGAGAAACCCATGACAGTGATGGTACTCACTGCAACAGAACCATTTAATTATAAAGAGGGAAAAGAGAACATGTTTCATGCTACAGTGGCTACAGAGAGCCAATATTACCGTGTGAAAGTTTTCAACATGGACTTGAAAGAGAAGTTCACAGAAAATAAATTTATTACCATTTCCAAATACTTCAACAGCAGTGGCATCCTAGAGATCAATGAAACTGCCACTGTG…
ENSMUSG00000024078	Ttc27	-0.19475938996575123	tetratricopeptide repeat domain 27 [Source:MGI Symbol;Acc:MGI:1921446]	ATGCCGGGAATGATGTGGACGCCGGAGCTGGCGCTTCTGAGGGGCTTCTCCACGGAGGCGGAGCGGCTGGTTTGGAAGCAGGAGGGCATCTGTGGTTCAGATATTGGAGTTTTCTTAGAATTGCTGTTAGAAGGGAGCTATGAGGCTTTGTTCTTCCATTCAACGACACAAACTATTTTAAATTCAACAATGATGGCTGAAGAAAAGATTGACAGCTACCTGGAGAAGCAGATAGTGAATTTCCTGGATTGCTCTACAGATTTGGAAGAAATTGAAAGACAGCAGCTGGTATTCCTACTTGGTGTGAGCAGCTTGCAGCTTTTTGTCCAGAGCAACTGGACTGGACCTCTTGTGGACTTGCATCCTCAGGATTTCTTGCCATCTGGTCTGCTGGAGCAA…
ENSMUSG00000027349	Fam98b	0.26734565737902316	family with sequence similarity 98, member B [Source:MGI Symbol;Acc:MGI:1915465]	ATGAGAGGGCCAGAGCTCGGGCCCGAAACCAGCATGGAAGGGGACGTTCTGGACACCTTGGAGGCGCTGGGGTATAAGGGGCCACTGTTAGAGGAACAGGCACTCTCCAAGGCAGCAGAGGGTGGACTGTCTTCACCTGAGTTTTCAGAGCTCTGCATTTGGTTAGGCTCCCAGATAAAGTCCTTATGCAACCTGGAAGAAAGCATCACTTCAGCTGGGAGAGATGACCTAGAGAGCTTCCAGCTTGAGATAAGTGGGTTTTTAAAAGAGATGGCCTGTCCATACTCGGTACTCGTCTCAGGAGACATTAAAGAGCGCCTCACAAAGAAGGATGACTGCTTGAAACTTCTGTTGTTTTTAAGTACAGAACTTCAAGCTTTACAAATATTACAGAAGAAA…
ENSMUSG00000065954	Tacc1	-0.06113982176126029	transforming, acidic coiled-coil containing protein 1 [Source:MGI Symbol;Acc:MGI:2443510]	ATGGCGTTCAGTCCCTGGCAGATCCTGTCGCCCGTGCAGTGGGCCAAGTGGACGTGGTCCGCGGTGCGCGGTTCGGGCGCCGGAGAGGACGAAGCCGGAGGTCCCGAGGGCGACCCCGAGGAGGAAGAGGACTCGCAAGCCGAGACCAAATCCCTGAGTTTCAGCTCGGATTCTGAAGGTAATTTTGAGACTCCTGAAGCTGAAACTCCAATCAGATCGCCTCTCAAGGAGTCTTGTGATTCATCACCGGGATTGGCAGAACCCGAGGCCAAACCCCAAGAATCTCGAGAAGCCGATGAACAGTTGGTAGCAGAAGTAATTGAAAAATGTTCACCCGATACATGTTCTCGATCTTCAGAAAATGAAGCGCCACAGGCGACCGTCGATTCTCACCCAGTC…
ENSMUSG00000051435	Fhad1	-0.25611100597155245	forkhead-associated (FHA) phosphopeptide binding domain 1 [Source:MGI Symbol;Acc:MGI:1920323]	ATGAAAGCGTATTTGAAGAGCGCTGATGGCTTTTTTGTCCTGAATAAAAGCACCACAATCGGCAAGCATGCAGATTCAGACCTCGTCTTACAGTCCGCAGATATCGACAACCACCATGCCCTCATTGAATTCAACGAGGCCGAGGGCACCTTCGTCCTTCAGGACTTTAACTCCCGCAACGGCACGTTTGTCAACGAGTGCCACATTCAGAATGTGGCGGTGAAGCTGATCCCTGGGGACATTCTGCGGTTCGGGTCTGCAGGGATGACCTACGAGCTGGTCATTGAGAACCCGTCCCCGGTCTCCTGCCCATGGGTGAGGGGCCCAGCACCTTGGCCAAGTCCACAGCCACACCTGTCGTCCTCGCCACCCGACATGCCCTTCCACCACGGTATCCAG…
ENSMUSG00000016257	Prelid3b	-0.04972018911378981	PRELI domain containing 3B [Source:MGI Symbol;Acc:MGI:1913640]	ATGAAGATCTGGACTTCGGAGCACGTCTTTGACCATCCATGGGAAACAGTCACTACGGCTGCAATGCAGAAATATCCAAACCCCATGAACCCGAGTGTGGTTGGCGTCGACGTGCTGGACAGACATGTCGATCCCTCTGGAAAGTTGCACAGCCACAGACTGCTCAGCACAGAGTGGGGCCTGCCTTCCATTGTGAAGTCTCTTATTGGTGCAGCAAGAACGAAAACGTACGTGCAGGAGCATTCTGTAGTTGACCCGGTAACGAGGACAATGGAGCTCAAGTCCACCAACATCTCATTTACAAATATGGTCTCAGTAGATGAGAGGCTGACATACAAGCCACACCTACAGGACCCAGAGAAAACTGTCCTGACCCAGGAAGCCCTCATCACAGTGAAA…
ENSMUSG00000075115	Olfr1200	-0.14785339814271045	olfactory receptor 1200 [Source:MGI Symbol;Acc:MGI:3031034]	ATGGAAAATCATAAAAACATCACAGAGTTCATTTTTATGGGTCTTTGGGAGAATAGACAAATAGAGTTGCTGTTCTTTTTCTTGTTCCTGCTTTGCTACCTGGCTGTCTTAATGGGGAACTCCGTCATCTTTCTCACCATCACCTGCAGCCACCTAATCGAACAACCAATGTATTATTTTCTCTGCCATCTTTCCCTCATGGACCTCTGCTACCCCTCCACTGTGATTCCTAGGCTCATCAGGGACTTGGCAGCAACAAGAAAAAACATTTCCTATAATGAGTGCATGACCCAGCTCTTCACTGCCCACTTGCTGGCAGGTGTGGAAATCTTCATCCTGGTGTCCATGGCCTTGGACCGCTATGTTGCCATTGTCAAGCCCCTGCACTACATGGTTATC…
ENSMUSG00000046836	Brox	0.028496708917030402	BRO1 domain and CAAX motif containing [Source:MGI Symbol;Acc:MGI:1918928]	ATGACCCATTGGTTTCATAGGAACCCATTAAAAGCTACAGCTCCCGTGTCTTTTAACTACTATGGCATGATCACTGGTCCTCCCGCTTCAAAGATTTGCAATGACTTGAGGTCCGCCAGGACTCGGCTCCTCGAGTTGTTCACTGATTTGAGCTGTAATCCAGAAACAATGAAGAATGCGGCAGACTTGTATTTCTCTCTTTTACAAGGTTTCATAAATTCAGTGGGTGACTCTACACAGGAAAGCAAATTACGATACATTCAGAATTTCAAGTGGACCGATACATTGCAAGGACACGTTCCGAGTGCCCAGCAGGATGCTGTTTTTGAACTGATTTCCATGGGATTTAATGTAGCGCTGTGGTACACAAAATATGCTTCAAGATTGGCTGGAAAAGAA…
ENSMUSG00000059023	Olfr1201	-0.31504422293040923	olfactory receptor 1201 [Source:MGI Symbol;Acc:MGI:3031035]	ATGCAGCAGAACAGCACTGTCACTGAGTTTATACTACTAGGATTGACACAGGATCCCCTGAAGCAGAAAATGGTGTTTATAATCTTCTTAGTTTTCTATTTGGGGACTGTAGTGGGGAATACACTCATTATTGTGACAATCAAGTTCAGTCGGACACTTGGGAGTCCCATGTACTTCTTCCTATTTTATTTGTCCTTTTCTGATTCCTGTTTTTCAACATCCACAGCCCCAAGACTCATTGTGGATGCCCTCTCTAAAAAGAACATCATTTCCTACAATGAATGCATGACACAAGTCTTTGCTCTCCATTTATTTGGCTGCATGGATGTCTTTATCCTCATTTTCATGGCTGTTGACCGTTATGTGGCCATCTGTAAACCCTTGCGTTACTCAGTCATC…
ENSMUSG00000072812	Ahnak2	-0.2887989267417149	AHNAK nucleoprotein 2 [Source:MGI Symbol;Acc:MGI:2144831]	ATGGAAATGGATTCTCAAATTCAAAGTAGTGTTTCCATAGTGGAATCCCCCCAGCATGCCCCTCTGGAAAAGGACGTGGAGAAAGGAAGAAGCCGGAAGCTGAGCTTTTCCATGCCAAGACTGGCACTACCCAAGATAAAGGTTTCTAAGGGGACGGCTTCTGTGCCACACGGAGACATGAGGCCTTCACTCAGTGGTACCACATCTGGAGGTGATTTGGTAGTCGTAGAAACAGCTGTCAGTGATGCCCACGTTGGGGACACTCATTCAAAAGATGTCACCACAGAACTCCATGTCAGATCCCCCTCAACCACAGCAGAGTTGGTTAGGTCCAAAACTGAGCTTCCTTCTTCCAAAGATGATCTGAATGTCAGAGGTGACAGCAAAAGTCTCATGACT…
ENSMUSG00000020770	Unk	-0.8131905287417812	unkempt family zinc finger [Source:MGI Symbol;Acc:MGI:2442456]	ATGTCGAAGGGCCCCGGGCCCGGCGGCTCGGCAGCTTCCTCGGCGCCCCCGGCCGCTACCGCTCAGGTGCTGCAGGCACAGCCCGAGAAACCGCAGCACTACACGTACCTGAAGGAATTCCGCACAGAGCAGTGCCCACTCTTCGTGCAGCACAAATGCACACAGCATCGGCCCTATACCTGCTTCCACTGGCACTTTGTGAACCAGCGTCGCCGCCGTTCCATCCGCCGACGGGATGGCACCTTCAACTACAGTCCAGATGTCTACTGCACGAAGTATGACGAGGCTACAGGCCTCTGCCCCGAGGGCGACGAGTGCCCATTCCTGCACAGAACCACTGGGGACACTGAGCGCAGGTATCACCTTCGTTACTATAAAACTGGAATCTGCATCCATGAG…
ENSMUSG00000064084	Olfr1202	0.11646191582404689	olfactory receptor 1202 [Source:MGI Symbol;Acc:MGI:3031036]	ATGGAAATTAAGAACAACGTGACCGAGTTTGTTCTCCTGGGGCTCACACAGAATCTGCACTTGCAAAAAATAGTATTTGTTGTGTTTTTGGTTATCTATGTTTTCTCTGTGGTAGGAAATTTGCTCATTGTAATCACCATTACAAACAGCCAACTGTTGGGGTACCCTATGTATTACTTCCTGGCCTATCTCTCTTTTATTGATGCTTGCTACTCCTCTGTCAATACACCTAAAGTGATTGCTGATTCACTACATAAAAGGAAGTCTATTAAATTCAATGGATGCATGACCCAAGTTTTTGCAGAACATTTCATTGGAGGAACTGAAGTCATCTTGCTTACTGTGATGGCTTATGACCGCTATGTAGCCATCTGTAAACCCCTGCACTATGCAACCATC…
ENSMUSG00000031928	Mre11a	-0.10783455970713537	MRE11A homolog A, double strand break repair nuclease [Source:MGI Symbol;Acc:MGI:1100512]	ATGAGCCCCACAGATCCACTTGACGATGAAGACACATTTAAAATCCTGGTTGCCACTGATATTCATCTTGGATTTATGGAGAAAGATGCAGTTAGAGGAAATGATACATTTGTGACATTTGATGAAATCTTAAGACTTGCCCTGGAAAATGAAGTGGATTTTATTTTGTTAGGTGGTGATCTTTTCCATGAAAACAAGCCCTCGAGGAAAACCCTGCACAGCTGCTTGGAGCTGCTTAGGAAGTACTGTATGGGTGACCGCCCTGTGCAGTTTGAGGTCATCAGTGATCAGTCAGTCAACTTTGGTTTTAGTAAGTTTCCATGGGTGAACTACCAGGATGGCAATCTCAACATTTCCATTCCAGTATTTAGTATCCACGGCAACCATGATGATCCCACG…
ENSMUSG00000033114	Slc35d2	-0.01668052687244934	solute carrier family 35, member D2 [Source:MGI Symbol;Acc:MGI:1917734]	ATGGAGGAGCCCAACGCGGCGCCGTTGCCCTCTCGCCTGGCCAGGCTGCTGTCGGCGCTCTTCTATGGCACATGCTCCTTCCTCATCGTGCTGGTCAACAAGGCGCTGCTGACCACATACGGTTTTCCCTCACCAATTGTACTTGGAATTGGACAGATGGCTACCACCATAATGATATTGTATGTGTTCAAGCTAAATAAAATAATCCATTTCCCTGATTTTGACAAGAAAATTCCTGGAAAGCTGTTCCCTCTGCCCCTTCTCTACGTTGGAAACCACATAAGTGGCTTATCAAGCACAAGTAAATTAAGCTTGCCGATGTTCACCGTGCTCAGGAAGTTTACGATTCCATTCACTTTACTCCTGGAGGCTATCATACTTGGGACACAATATTCATTG…
ENSMUSG00000051256	Jagn1	0.002346778092868009	jagunal homolog 1 [Source:MGI Symbol;Acc:MGI:1915017]	ATGGCGTCTCGGGCAGGCCCGCGAGCGGCCGGCACCGACGGCAGCGACTTTCAGCACCGGGAGCGCGTCGCCATGCACTACCAGATGAGTGTGACCCTCAAGTACGAAATCAAGAAGCTGATCTACGTGCATCTCGTCATATGGCTGCTGTTGGTGGCCAAGATGAGCGTGGGACACCTGAGGCTCTTGTCACATGATCAGGTGGCCATGCCCTATCAGTGGGAATATCCGTATTTGTTGAGCATTGTGCCCTCTGTCTTGGGCCTGCTCTCCTTCCCTCGGAACAACATTAGCTACCTGGTGCTCTCCATGATCAGCATGGGGCTCTTCTCCATCGCTCCCCTCATTTATGGCAGCATGGAGATGTTCCCTGCGGCACAGCAACTCTACCGCCATGGC…
ENSMUSG00000027962	Vcam1	-0.014418988466761016	vascular cell adhesion molecule 1 [Source:MGI Symbol;Acc:MGI:98926]	ATGCCTGTGAAGATGGTCGCGGTCTTGGGAGCCTCAACGGTACTTTGGATACTGTTTGCAGTCTCTCAAGCTTTTAAAATCGAGATCTCCCCTGAATACAAAACGATTGCTCAAATCGGTGACTCCATGGCCCTCACTTGCAGCACTACGGGCTGCGAGTCACCATTGTTCTCATGGAGAACCCAGATAGACAGCCCACTAAACGCGAAGGTGAGGACGGAGGGGTCCAAGTCCGTTCTGACCATGGAGCCTGTCAGTTTTGAGAATGAACACTCTTACCTGTGCACAGCAACATGTGGCTCTGGGAAGCTGGAACGAAGTATCCACGTGGACATCTACTCTTTCCCCAAGGATCCAGAGATTCAATTCAGTGGCCCCCTGGAGGTTGGGAAGCCGGTC…
ENSMUSG00000029600	Rita1	-0.453097433662942	RBPJ interacting and tubulin associated 1 [Source:MGI Symbol;Acc:MGI:1922021]	ATGAAAGCCCTCCACCTTCAGCACCGCAGTCCCACCAGCTACAGGGTCAAGGCCAGGGCATCCTATGTGGATGAGACCCTGTTTGGCAGCCCAGCAAGAACCAGACCTGCCCAACCAGACTTTGACCCACCCTGGGTGCAGAATTGTAACCGATCCAGAGGAGTGGGCCCAGGACCACCGAAGGGCTCTCTGGCCAAGAGAGACTGTGAGTCCCCCTCTTCCAGGGGCAGCACCCCAAACCTCACACCAAGGAAGAAAAACAAATACAGGCTGATTGGCCATGCCCCATCCTACTGCGATGAGTCACTGTTTGGCACTAGCAAGGAGGGGTCTCGGATGGCCGTGGGGGATGCTGCAAAGCTCCGGACCCTTTTCTGGACCCCACCAGCCACCCCTAGG…
ENSMUSG00000020525	Ppm1d	-0.49979206515260166	protein phosphatase 1D magnesium-dependent, delta isoform [Source:MGI Symbol;Acc:MGI:1858214]	ATGGCGGGGCTGTACTCGCTGGGAGTGAGCGTCTTCTCGGACCAGGGCGGGAGGAAGTACATGGAGGACGTAACTCAGATCGTGGTGGAGCCCGAGCCGGCTGCGGAGGACAAGCCGGCGCCGGTACCGCGGCGGGCGCTCGGGTTGCCGGCGACCCCCACTCTCGCCGGCGTCGGGCCATCGGAAAAAGGCCCGGCGGCGGCCCGCGACCCTGCCCCGGACGCCGCGGCCTCGCTACCCGCTGGCCGCTGCTGTCGCCGCCGCTCTTCGGTGGCCTTCTTTGCAGTGTGCGACGGGCACGGCGGTCGGGAGGCGGCACAGTTTGCCCGGGAGCACTTGTGGGGTTTCATCAAGAAGCAGAAAGGCTTCACCTCGTCCGAGCCCGCCAAGGTGTGCGCT…
ENSMUSG00000063651	Cnfn	0.10664640207051548	cornifelin [Source:MGI Symbol;Acc:MGI:1919633]	ATGCAGTTTGAGATGCACGACCACGTGAAAGGCAAAGCCATGTCATATCCAGTGACTAGTCAGCCTCAGTGCGCCAACACCTGCTACCAGACACAGCTCAGCGATTGGCACACGGGCCTCACCGACTGTTGCAACGACATGCCCGTCTGTCTGTGCGGCACTTTCGCCCCGCTGTGCCTGGCCTGCCGCATCTCCGATGACTTTGGGGAGTGCTGCTGTGCGCCCTACCTGCCCGGAGGTCTGCACTCTCTGCGCACCGGCATGAGGGAGCGCTACCACATCCAGGGCTCCGTCGGGCACGACTGGGCTGCCCTCACCTTTTGCCTGCCCTGCGCCCTCTGTCAGATGGCGCGGGAACTGAAAATCCGAGAGTAA
ENSMUSG00000025432	Avil	0.3434261471590996	advillin [Source:MGI Symbol;Acc:MGI:1333798]	ATGTCTCTGAGCAGTGCCTTCAGGGCTGTGAGCAACGACCCCCGGATCATCACATGGAGAATTGAGAAAATGGAGCTGGCGCTGGTGCCCCTGAGTGCTCACGGCAACTTCTACGAGGGAGACTGCTACATCGTCCTCTCGACCCGGAGAGTGGGCAGCCTTCTCTCCCAGAACATCCACTTTTGGATCGGGAAGGACTCCTCCCAGGACGAGCAGAGCTGCGCGGCCATCTATACCACACAGCTGGATGACTACCTGGGAGGCAGCCCGGTGCAGCACCGTGAGGTCCAGTACCACGAGTCCGACACCTTCCGTGGCTACTTCAAGCAGGGCATCATCTATAAAAAGGGGGGTGTGGCCTCTGGGATGAAGCACGTGGAGACCAACACCTATGATGTG…
ENSMUSG00000031948	Kars	0.17948863196117018	lysyl-tRNA synthetase [Source:MGI Symbol;Acc:MGI:1934754]	ATGTTGATGCAAGCTGCTGTCAGGCTTGTTAGGGGGGCCCTGCGCCAAACCTCATGGGCAGAATGGGGTCAGAGGGAACTTCGACTGGGCCACCTTGCTCCTTTCACAACGCTCCACAAGGACCAGCCACTTTCTGATAGAAGAAGTGAGCTGAAGAGGCGTCTGAAAGCTGAGAAGAAACTGGCAGAGAAGGAGGCCAAGCAGAAAGAGCTGAGTGAGAAACAGCTAAACCAGACTGCTTCCGCTCCCAACCACACGGCTGACAATGGCGTGGGTGCTGAGGAGGAGACTCTGGACCCAAATCAATACTACAAGATCCGAAGTCAAGCCGTCCAGCAGCTGAAGGTCACTGGGGAGGATCCGTACCCACACAAGTTCCACGTGGACATCTCACTCACT…
ENSMUSG00000045333	Zfp423	-0.8522326694810042	zinc finger protein 423 [Source:MGI Symbol;Acc:MGI:1891217]	ATGTCCAGGCGGAAGCAGGCGAAGCCGCGATCGGTGAAAGTTGAAGAGGGGGAGGCCTCGGACTTCTCGCTGGCCTGGGATTCCTCTGTGGCAGCAGCAGGAGGCCTGGAAGGAGAGCCAGAGTGTGATCGGAAAACCAGCCGTGCGCTGGAAGACAGGAACAGCGTGACAAGTCAAGAGGAGAGAAATGAGGACGATGAAGACGTGGAAGATGAGTCAATTTACACCTGCGATCACTGTCAGCAGGACTTCGAGTCTCTGGCAGACCTGACGGACCACCGGGCCCACCGCTGTCCTGGAGATGGTGATGACGACCCACAGCTCTCCTGGGTGGCTTCATCTCCCTCCAGCAAGGATGTTGCGTCACCTACGCAGATGATAGGAGATGGTTGTGACCTC…
ENSMUSG00000061039	Olfr920	-0.03914108654912027	olfactory receptor 920 [Source:MGI Symbol;Acc:MGI:3030754]	ATGGCTTTGATAAATGGCTCTGTGGTAACAGAATTCATTCTCTTGGGATTAACAGACCAGCCTGACCTTCAAGTACCCCTGTTCCTGGTCTTTCTATTAATGTACATGATAACTGCATTGGGGAATTTGACTTTAATTATTCTCATCGTGCTGAATTCTCACCTTCATACCCCTATGTATTTTTTTCTTTTTAACTTGTCCTTTGTGGACTTTTGTTACTCTTCTGTAATTATACCAAAAATGCTGATGAACTTTATTCTAAAGAAAAATTTTATCTCCTATGTGGGTTGTATGACTCAGTTCTACTTATTTGGTTTCTGTGTCATTTTGGAGTGTTATATTCTCACATCAATGGCCTATGATCGTTATGTGGCTATCTGCAATCCACTCTTGTATAAC…
ENSMUSG00000025477	Inpp5a	-0.03401488896304858	inositol polyphosphate-5-phosphatase A [Source:MGI Symbol;Acc:MGI:2686961]	ATGGCGGGGAAGGCGGCCGCCCCCGGCACCGCGGTCCTGCTGGTCACGGCCAACGTGGGCTCGCTCTTCGACGACCCAGAAAACCTGCAGAAGAACTGGCTTCGGGAATTTTACCAGGTCCTGCACACACACAAGCCTCACTTCATGGCCTTGCACTGCCAAGAATTTGGAGGGAAAAACTACGAGGCCTCCATGTCCCATGTGGACAAATTTGTCAAAGAACTACTATCCAGTGACGCAATGAAAGAATACAACAGGGCGCGTGTCTACCTGGATGAAAACTACAAGTCACAGGAACACTTCACGGCACTAGGAAGCTTTTATTTTCTTCACGAATCCTTAAAAAACATCTACCAGTTTGACTTTAAAGCTAAGAAGTATAAAAAAGTCACTGGCAAG…
ENSMUSG00000034837	Gnat1	0.7319068752660934	guanine nucleotide binding protein, alpha transducing 1 [Source:MGI Symbol;Acc:MGI:95778]	ATGGGGGCTGGGGCCAGCGCTGAGGAGAAGCACTCCAGAGAGCTGGAGAAGAAGCTGAAAGAGGATGCTGAGAAGGATGCCCGCACTGTGAAACTGCTGCTTCTGGGTGCCGGTGAATCCGGGAAGAGCACTATTGTCAAACAGATGAAGATTATCCACCAGGACGGGTATTCGCTGGAGGAATGCCTCGAGTTCATTGCCATCATCTACGGCAACACTCTGCAGTCCATCCTGGCCATCGTTCGGGCTATGACCACGCTCAACATTCAGTATGGAGATTCAGCCCGGCAGGATGATGCCCGGAAGCTCATGCACATGGCAGATACTATTGAGGAAGGCACAATGCCCAAGGAGATGTCAGACATCATTCAGCGCTTGTGGAAGGACTCGGGTATCCAA…
ENSMUSG00000096508	Gm7903	-0.6831325943205381	predicted gene 7903 [Source:MGI Symbol;Acc:MGI:3648697]	ATGATGGACACCAAGGACCCGCCCACACTATTGGATCTTGCTACACAGAGTCTATTGAGTAATGAGCATGCAGCAATCCAAGCCCTGGAGGAGATCCCAAGGGAGCTTTTTGTCCCTCTATTCACTGCTGCCTTCACGGGTAGACACAAGAATATACTGACAGCAATTGTGAAGGCTTGGCCTTTTGCCTGTCTCCACATTGGGGCATTAAGTGTGCAGGAACCCGAGCGTGAACTCCTGAAAGCCTTGATTGAGAGTCTTCAGTTCCTCCCTGCCCTGAACTCAGCTACTAGGAGCCCTAAACTGAGGATCCTAGATTTAAGGCAGGATGCTGGCTGCAAGACCGTATGTCCTGATATCAGTACTAATTCGACAATTTGCTTTCGTTCTTGTGCTCAC…
ENSMUSG00000050600	Zfp831	-0.6230906609387562	zinc finger protein 831 [Source:MGI Symbol;Acc:MGI:3641861]	ATGGAGGCGTCAGAACCGACCCACCCTACCCCATCGGCCACGGACCAGCCAGCCTCTGTACCCGGCATTCCAGGGGGCCTAGGGGGGCAGGCCTCACCTCGCCTGACCCTGGGTCCTGTTATCCTGCCACCAGAGCAGGGCCTGGCCCCAACTGTGTTCTTGAAGGCATTGCCTGTCCCCTTATACCACACGGTACCTCCTGGGGGCCTCCAGCCACGTGCACCCCTGGTGACAGGCAGCCTGGAGGGGGCCAGCGTACCTTTCATTCTCAGCCCCTTGCTGCAGCCTGAAGGACCCAGTGCCACCCAGGTGGGCAAGCCAGCCACCCCCGCCCTGACTGTGAACATTGTAGGCACATTGCCTGTACTCTCCTCGGGTGTGGGGTCTGCACTGGTCAGC…
ENSMUSG00000051652	Lrrc3	-0.012609556510106843	leucine rich repeat containing 3 [Source:MGI Symbol;Acc:MGI:2447899]	ATGGGCCCCAGGGGCAGGCAGAGCCCCTCAGCCACACTGGCCCCCTCCCAGGGGTCTTGCTTCTTCATCCTCTTCTGCTTACGGTTAGGTGCCTCCTGCCCACAGGCCTGCCAGTGCCCTGACCATGCTGGGGCCGTGGCTGTCCATTGCAGCTCAAGAGGGCTGCAGGAGATCCCTAGGGACATCCCAGCCGACACGGTGCTTCTGAAACTAGACGCCAACAGAATCTCCCGAGTCCCCAATGGAGCCTTCCAACACCTGCCTCAGCTGAGGGAGCTGGACCTGTCCCATAATGCCATTGAGGCCATTGGGCCAGCAGCCTTCTCAGGTCTGGCTGGGGGCCTGCGGCTGCTGGACTTATCCCACAATCGCATCCGAAGAATTCCAAAGGACGCCCTG…
ENSMUSG00000055095	Spink6	0.2830727655838825	serine peptidase inhibitor, Kazal type 6 [Source:MGI Symbol;Acc:MGI:3648654]	ATGAAAGTAGCAGGTGTCTTTCTGCTCCTCTCTCTGGCTCTTCTCTGCTTTTTCTCAGGTGCCTTCAGTCAAGGAGGACAGGACAAAAGAGGCTGGATCACAAGATCAGAGGGCCGATTTCCAGGGAAAGGTGTCTTAAGGCATCGTCTCTTTCAAATTAATTGTGGTGAGTTCCGTGACCCCAAGGTCTTCTGCACTAGGGAATCTGACCCACTCTGCGGCTCTGATGGCCAGACATATGGGAATAAATGTGCCTTCTGCAAGGCATTGGAGAAAAGCTCTGGGAAGATCAACCTGAAGCATCGTGGGAAATGCTGA
ENSMUSG00000059687	Olfr108	-0.24976489306311853	olfactory receptor 108 [Source:MGI Symbol;Acc:MGI:2177491]	ATGCAAATTTCATCTTCAATAATAAGCCCAAGGATGAACTGCAGTCAGGCTCCTGGCTTTATCCTCTTGGGACTACCCAGAGAACCAGAGAAGTGGCAGCACTTCTTTATCATCTTCCTAGGTCTTTACTTGCTGGGACTTTTAGGGAACCTGCTACTTCTGTTAGCTATTGGTTCTGATGTCCACCTCCACACCCCCATGTATTTCTTCCTCAGTCAGCTCTCACTTGTGGATCTTTGCTTCATCACCACCACAGCTCCTAAAACACTGGAGACTTGGTGGACTGGAGATGGATCAATCTCATTCTCTGGATGCCTGACTCAATTGTATTTCTTTGGTGTTTTTGCAGATATGGATAACCTGCTTCTGGCAGTCATGGCTATTGACCGCTATGCTGCT…
ENSMUSG00000031134	Rbmx	6.431973643183063e-4	RNA binding motif protein, X chromosome [Source:MGI Symbol;Acc:MGI:1343044]	ATGGTTGAAGCAGATCGCCCAGGAAAGCTCTTTATTGGTGGGCTTAATACAGAGACGAATGAGAAAGCCCTTGAGGCAGTGTTTGGCAAATATGGACGAATAGTGGAAGTTCTTTTGATGAAGGACCGAGAAACGAATAAGTCAAGAGGATTCGCTTTTGTCACTTTTGAAAGCCCAGCAGATGCAAAGGATGCTGCCAGAGACATGAATGGAAAGTCCTTAGATGGGAAAGCCATCAAGGTGGAGCAAGCCACCAAACCATCATTTGAAAGTGGTAGACGTGGACTACCCCCACCTCCAAGAAGCAGAGGCCCTCCCAGAGGTCTTCGAGGAGGAAGAGGAGGAAGTGGAGGAACCAGAGGACCCCCCTCCCGGGGAGGACACATGGATGATGGTGGC…
ENSMUSG00000052504	Epha3	-0.022269374541859042	Eph receptor A3 [Source:MGI Symbol;Acc:MGI:99612]	ATGGATTGTCACCTCTCCATCCTCGTCCTGCTCGGCTGCTGCGTCCTCAGCTGCTCCGGAGAACTGAGCCCACAGCCTTCCAACGAAGTTAATCTACTAGATTCGAAAACAATTCAAGGAGAGCTGGGCTGGATCTCCTACCCATCCCATGGGTGGGAAGAGATCAGTGGTGTTGATGAACATTACACACCAATCAGGACTTACCAGGTGTGCAATGTCATGGATCACAGCCAAAATAATTGGCTGAGGACAAACTGGGTACCCAGAAACTCAGCTCAGAAGATCTATGTGGAGCTAAAGTTCACACTGCGGGACTGTAACAGCATTCCATTGGTTTTGGGGACTTGCAAGGAGACCTTTAACCTGTACTACATGGAGTCTGATGATGATCATGGCGTC…
ENSMUSG00000026572	Tbx19	-0.15299312184865696	T-box 19 [Source:MGI Symbol;Acc:MGI:1891158]	ATGAGTGAACTGGCCACACAGAAGGCTGGCGAAGGCACTGTGTCTCGCCTGCTTAACGTGGTGGAAAGTGAGCTCCAGGCAGGGAGGGAGAAGGGAGACCCTACAGAGAAGCAACTTCAGATCATCCTGGAGGATGCTCCCCTCTGGCAGAGATTCAAGGAAGTCACTAATGAAATGATCGTGACCAAGAACGGCAGACGGATGTTCCCTGTCCTGAAGATTAGTGTCACAGGGCTGGACCCCAATGCTATGTACTCTCTCCTACTGGACTTCGTCCGGACCGACAGTCACCGCTGGAAGTACGTCAATGGTGAATGGGTCCCCGCAGGCAAGCCAGAGGTCTCTAGCCACAGCTGTGTCTACATTCACCCCGACTCCCCCAACTTCGGGGCTCACTGG…
ENSMUSG00000059713	Rcan3	-0.13050519496244214	regulator of calcineurin 3 [Source:MGI Symbol;Acc:MGI:1858220]	ATGCTCCGAGACAGCCTGAAATCTTGGAATGACAGCCAGTCAGACCTCTGTAGCAGCGACCAGGAGGAGGAAGAGGAGATGGTCTTCGGTGAAAATGAGGACGGACTGGAAGAGATGATGGACCTAAGTGACCTGCCCACCTCACTCTTTGCTTGCAGTGTCCATGAAGCAGTGTTTGAGGTCCAAGAGCAAAAGGAGAGGTTTGAGGCCCTGTTCACCCTCTACGATGACCAGGTCACATTCCAGTTGTTCAAGAGCTTTCGCAGAGTGAGGATCAACTTCAGCAAGCCCGAGGCTGCGGCAAGAGCGCGGATAGAGCTCCACGAGAGTGAGTTCCACGGACGGAAGCTGAAGCTTTACTTCGCACAGGTGCAGGTGTCCGGGGAGGCCCGGGACAAG…
ENSMUSG00000033191	Tie1	-0.08953395365509084	tyrosine kinase with immunoglobulin-like and EGF-like domains 1 [Source:MGI Symbol;Acc:MGI:99906]	ATGGTCTGGTGGGGATCCTCTTTGCTGCTCCCCACTCTTTTCTTGGCCTCTCATGTTGGTGCGTCTGTTGACTTAACATTGCTGGCCAACCTGCGCATCACAGACCCCCAGCGTTTCTTCCTGACCTGCGTGTCTGGTGAGGCCGGAGCAGGGAGGAGCTCGGACCCGCCCCTGCTGCTGGAGAAGGATGATCGCATCGTGCGCACCTTCCCGCCTGGGCAGCCCCTGTACCTGGCACGCAACGGTTCTCACCAGGTCACGCTGAGGGGCTTCTCCAAGCCCTCGGATTTGGTAGGCGTCTTCTCCTGTGTGGGTGGTGCTGGCGCGCGGCGCACTCGAGTTCTCTATGTGCACAACAGCCCAGGGGCACACCTGTTTCCAGACAAGGTCACACACACG…
ENSMUSG00000054994	AV320801	-0.6153666647695374	expressed sequence AV320801 [Source:MGI Symbol;Acc:MGI:3035227]	ATGTGGTTCATTATGATGGACACCAAGGACCCGCCCACACTATTGGATCTTGCTACACAGAATCTATTGAGTAATGAGCATGCAGCAATCCAAGCCCTGGAGGAGATCCCAAGGGAGCTTTTTGTCCCTTTGTTCACTGCTGCCTTCACGGGTAGACACAAGAATATACTGACAGCAATTGTGAAGGCTTGGCCTTTTGCCTGTCTCCACATTGGGGCATTAAGTGTGCAGGAACCTGAGCGTGAACTCCTGAAAGCCTTGATTGAGAGTCTTCAGTTCCTCCTTGCCCTGAACTCAGCTACTAGGAGCCCTAAACTGAGGATCCTAGATTTAAGGCAGGATGCTGGCTGCAAGACCGTATGTCCTGAGATCAGTACTAATTCGACAATTTGCTTTCGT…
ENSMUSG00000039728	Slc6a5	0.2318735981691398	solute carrier family 6 (neurotransmitter transporter, glycine), member 5 [Source:MGI Symbol;Acc:MGI:105090]	ATGAATAAACAGCCAGCCAACATCTTGGAGGCAGCGGTGCCAGGCCACCGGGATAGTCCTCGTGCACCTAGGACCAGCCCTGAACAGGATCTTCCTGCTGAGGCCCCCACGGCCACTGTCCAGCCGCCACGTGTGCCCAGGTCGGCTTCCACCGGCGCCCAAACTTTCCAGTCTGCGGATGCGAGAGCCTGCGAGGCCCAGCAGTCCGGAGTAGGGTTTTGTAATCTCAGCAGCCCCCGGGCACAAGCGACCTCCGCGGCCCTCCGGGACTTAAGCGAAGGGCACAGCGCACAGGCCAATCCCCCTTCCGGGCCCGCCGGGGCTGGCAACGCTCTGCACTGCAAGATTCCAGCTCTGCGTGGCCCGGAGGAGGACGCGAACGTGAGTGTGGGCAAGGGC…
ENSMUSG00000029601	Iqcd	-0.05649594500390273	IQ motif containing D [Source:MGI Symbol;Acc:MGI:1922982]	ATGGCCTTGGACCAGGTCAGCATACCCCCTTCCTACCACGGACTGGCCATCCAAAGAATCCCACTGAGAACAGGTCTAGTCCCAGCAGAGCCGATGAAGACCTTAGTCCCATCCAAATCCAAGCTCAACACCATCGAGGCCAAGAGGATCATGTCAGTCCTGGATGAGGCCATACACAAGATAGAGCTGATAACCCTGATGTCCTACATGGAGTCCCACCCAGAGGCTCTGGAGGACACGCTGCCCGAGGATTTCGTGAGAGCCCTAAGAGAGCACTTGGACATTGGCCAGACCCTGGTGGAGAGGGCCAGCATCCTGCAGAGGAGACACAAGAAGCTGGAGGAAGAGGAAGAAGCCGAGGAAACTAGGAACCAGGAACGCCTACTGTCCCTAGAGCTG…
ENSMUSG00000042790	Rnf214	-0.2802708497332437	ring finger protein 214 [Source:MGI Symbol;Acc:MGI:2444451]	ATGGCGGCCTCTGAGGTAGCTGGCCTTGGGGCCGGTACCCCGAGTCCTTCGGAATCTTCTGCTTTGTGTGCATCCAAGTCCGATGAATCTCTCCCAGATGGCCTAAGCCCCAAAGACTCTGCCCAGAAACAGAAGAACTTGTCTCCGCCGAGTGTAAGTAGCCAAATGATAACCAAGGAGAGTAACAGAAATGCCCATTTGGAACATCCAGAACAGAATCCTGGTTCATCAGTGGGTGATACTTCAGCAGCGCACGAGGAAGTTGTAGGAGAAAACTTGGTAGCCACAGCCCTTTGTCTTTCTGGCAATGGGTCTCAGTCTGATTTGAAGGACTTGACCAACCCAGCAGGAGAGGAGGGGGACACGAGCCTCCGGGAGAGCCTCCATCCAGTCACTCGG…
ENSMUSG00000039774	Galnt12	-0.2730505618097655	polypeptide N-acetylgalactosaminyltransferase 12 [Source:MGI Symbol;Acc:MGI:2444664]	ATGTGGGGGCGTGCGGTGAGGAGGCGCTGCCCGCGGGGGCTGCGGCGCGGCCGGGAGGCGTTGCTGGCACTGCTGGCCCTGGCAGGGCTGGGCGCGCTGCTGCGGGCTCGAAGCAGGTCGGGGACGGTGGACCCGGGACCCCCGCGGACTCCTCTCCCCGGGCGTCACGAGCCAGTGCTGCCCAGGCCGCCGCTGCCCGCCGATGCTCTGGGAGCGCATGGGGAGGCGGTGCGGCTGCAGCTGCAGGGCGAGGAGCTGCGGCTGCAGGAGGAGAGCGTGAAGCAGCACCAGATCAACATCTATCTGAGCGACCGTATCTCGCTGCACCGCCGACTGCCCGAGCGCTGGAACCCTCTGTGCAGAGAGGTGAAATACGATTATGATAACCTGCCCAAGACT…
ENSMUSG00000027524	Edn3	-0.3505035364371779	endothelin 3 [Source:MGI Symbol;Acc:MGI:95285]	ATGGAGCCGGGGCTGTGGCTCCTTCTCGGGCTCACAGTGACCTCCGCTGCAGGACTTGTGCCTTGCCCCCAGTCTGGGGACTCTGGCAGAGCCAGTGTGTCCCAGGGTCCCCCTGAAGCTGGATCAGAGAGGGGCTGTGAAGAGACTGTGGCTGGCCCTGGTGAGAGGATTGTGTCCCCAACAGTTGCACTGCCTGCACAGCCTGAAAGCGCTGGGCAGGAACGGGCACCAGGCAGGTCTGGGAAACAAGAGGACAAGGGGCTGCCTGCACACCACCGCCCTCGCCGCTGCACGTGCTTCACTTACAAGGACAAGGAGTGTGTCTACTATTGCCACCTGGACATCATCTGGATTAACACTCCTGAACAGACTGTGCCCTATGGACTGTCCAACTACAGA…
ENSMUSG00000049926	Olfr921	-0.11064732984532108	olfactory receptor 921 [Source:MGI Symbol;Acc:MGI:3030755]	ATGGCTCTAGTAAATGGCTCAACTGTGACTGAATTCATTCTTTTGGGATTAACAGACCAGCCTGGACTCCAAATGCCTCTTTTCTTATTGTTTCTATTAATGTACATGATCACAGTATTCGGTAATTTGACTTTGATATTTTTAATTCTGTTAAATTCTCACCTACATACTCCCATGTATTTTTTTCTCTTGAATTTATCTTTTGTAGATCTCTGTTATTCTTCTGTGATTACACCAAAAATGCTGATGAATTTTATACTAAAGAAGAATCTTATCTCTTATATGGGATGTATGTCCCAACTCTACTTCTTTTGTTTTTTCATAATTTCTGAATGTTATGTACTGGTGTCAATGGCCTATGATCGCTATGTTGCAATCTGTAATCCACTGTTGTATAAC…
ENSMUSG00000051705	Senp8	-0.37428000530049255	SUMO/sentrin specific peptidase 8 [Source:MGI Symbol;Acc:MGI:1918849]	ATGCTTCTGGAATTTCTGAGAATCCCTGCTCAATACAAGATGGACCCTGTGGTCTTGAGTTATATGGACAGTCTATTGCGGCAATCAGATGTCTCACTATTGGACCCTCCAAGCTGGCTCAACGACCACATTATTGGGTTTGCCTTTGAATACTTTGCCAATAGTCAGTTTCATGACTGCTCAGACCATGTCTGTTTCATCAGCCCTGAAGTCACCCAGTTCATTAAGTGCACCAGCAGCCCTGCAGAAATTGCCATGTTCCTTGAACCCCTGGATCTTCCCCACAAAAGAGTGGTATTTTTAGCCATCAATGATAATTCTAACCAGGCAGCCGGAGGTACCCACTGGAGTTTGTTGGTTTATCTCCAAGATAAAAATAGCTTCTTTCATTATGATTCC…
ENSMUSG00000052760	A630001G21Rik	-0.40815000184343553	RIKEN cDNA A630001G21 gene [Source:MGI Symbol;Acc:MGI:2443131]	ATGTTTGGAGTGATCCAGAAAGAGGAACGTTTTAATGAAGTATTTTTAAATTACTTCAAGGAAAATAAAATAGAAATTGCCCATGCAATTACCAAGCTGTTTCCTTTCCTAGAAAGCCTAAGGGACCACTCCTTCATCACAGACAAAATCTATGCTGATTCTTACGAAGCCTGTAGGAACTCGGTTCCCATAGTGGAAGTGGTGTACAATGTTCTCAGTCACCTGGAGAGGTTGTCGGACTCATCGTTTCTATGGGCTCTGTTTAACAGAGTGAACCTGAAGGAATATCCTGCGTTAAGAGAGATTCATAAAAGCCTGGGAACTGAGCTACAGGACGGATACTCGCCCCAGAAATGCAAACAGGAAGAACAGAAGAAGCTTGCCACCGTGCACCCAAGT…
ENSMUSG00000057447	Olfr1205	-0.1275946323937461	olfactory receptor 1205 [Source:MGI Symbol;Acc:MGI:3031039]	ATGCAGCAGAACAGCACTGTCACCGAGTTTATACTACTAGGATTGACACAGGATCCCCTGAAGCAGAAAATGGTGTTTATAATCTTCTTAGTTTTCTATATGGGGACTGTAGTGGGGAATACACTCATTATTGTGACAATCAAGTTCAGTCGAACACTTGGGGGTCCCATGTACTTCTTCCTGTTTTATTTGTCCTTTGCTGATTCCTGCTTTTCAACGTCCACAGCCCCAAGACTCATTGTGGATGCCCTTTCTAAAAAGAACATCATTTCCTACAATGAATGCATGACACAAGTCTTTGCTCTCCATTTATTTGGCTGCATGGAGGTCTTTGTCCTCATTTTCATGGCTGTTGACCGTTATGTGGCCATCTGTAAACCCTTGCATTACCCAGTCATC…
ENSMUSG00000091650	Apol11a	0.34966413743478064	apolipoprotein L 11a [Source:MGI Symbol;Acc:MGI:3649094]	ATGGATTGGAATGAGATCTTAGAGGGCATTAAGAAAGTGGAACGTCGCATTGTTGAAAAAGCCATTGATAACTTCACGGAAAAGTTCTTAAGAACAGATCTGAGGAGCCTTATAACTGAAGATGGAGCCTGGAATGGATTTGTGGAAGCAGCAGAGTTGTCAAGGGAGGAGGGAGAAGCACTGCGTGATGCTCTGAAGGAACGTTTAGCACAGGATCCCACAGATGAAAATGACAGACCTCAAAGGGAACAGCAGAAAGAGCGGTTTCTGCGAGAGTTTCCTCAGTTGAAGAAGAAACTTGAGGACCACATTAGGAAGCTCCGAGAGCTGGCTGACAAATTTGACCAGGTGCACAAGGACTGCACCATCTCTAATGTGGTGTCCACTTCTGCTAGTGCT…
ENSMUSG00000031212	Pgr15l	-0.276102493852756	G protein-coupled receptor 15-like [Source:MGI Symbol;Acc:MGI:2676330]	ATGAACACTTCCTTCAAGGGAGTGTCTCCTTTCCTGTCACAAATGGAAAGTGCCATTGATTGGCTCGGAGAAAATATCAGTTGGGTTCCATCAATAGAGGATCAAAGCTGCAATCACACAACCCAGAATGGAACCAATATCTCCAGTGCAGAATGGGGAGGGCCAACAGGATCAGTCAGGAGATGGCTGGGGGGCAATCCCCACATCATGGCAAAGATTGTGCTGACATTTGCATACGCTGTCATCATAGTGATATCTCTCTTTGGCAACTCCCTGGTATGCCAAGTTTTTGTCAAGCACAAGGAAATCAAGAAATCAACAGGCCTTCTCATCTTCAATCTGGCAATATCTGACATTTTGATAATCCTGCTCAACAGTCCATTTGCTCTGGCTCGTTTT…
ENSMUSG00000022858	Tra2b	-0.13660334553259332	transformer 2 beta [Source:MGI Symbol;Acc:MGI:106016]	ATGAGCGACAGCGGCGAGCAGAACTACGGCGAGCGGGAATCCCGTTCTGCTTCCCGAAGTGGAAGTGCTCACGGATCGGGGAAATCTGCACGGCATACACCTGCAAGGTCTCGCTCCAAGGAAGACTCAAGGCGTTCTAGATCAAAGTCCAGGTCCAGGTCTGAATCTAGGTCTAGATCCAGAAGAAGTTCTAGAAGGCATTATACAAGGTCACGATCACGATCTCGCTCGCATAGACGATCCCGGAGCAGGTCTTACAGCCGAGATTATCGCAGGCGCCACAGCCACAGCCATTCTCCCATGTCTACTCGAAGGCGTCATGTTGGGAACCGGGCAAATCCTGACCCCAACTGTTGTCTTGGCGTGTTTGGGTTGAGCTTATACACCACAGAAAGAGAC…
ENSMUSG00000054160	Nkx2-4	-0.6136626390804819	NK2 homeobox 4 [Source:MGI Symbol;Acc:MGI:97349]	ATGTCGTTGAGCCCCAAGCACACGACGCCCTTCTCCGTTTCCGACATCCTGAGCCCCATCGAGGAGACCTACAAGAAGTTCGGCGGCGTCATGGACGGTGCGCCGCCCGGCCTGGGGGCGCCCCTGGGGGCCGCTGCCTACCGCGCGCCACCGAGCGGCCCCTCCTCGCAGGCGGCGGCCGTGGCGGCGGGCATGCAGCCGCCCCACGCCATGGCCGGACACAACGCGGCGGCGGCAGCAGCGGCGGCAGCGGCGGCGGCCGCGGCGGCCGCCACCTACCACATGCCTCCCGGCGTCTCGCAGTTCCCGCACAGCGCCATGGGCAGCTACTGCAACGGCGGCCTGGGCAACATGGGTGAGCTGCCCGCCTACACGGACGGCATGCGGGGCGGCGCGGCG…
ENSMUSG00000025945	Crygf	-0.34410939584538214	crystallin, gamma F [Source:MGI Symbol;Acc:MGI:88526]	ATGGGGAAGATCACCTTCTATGAGGACCGCAGCTTCCAGGGCCGCCACTATGAGTGCAGCACCGACCACTCCAACCTGCAGCCCTACTTCAGCCGCTGCAACTCTGTGCGAGTGGACAGTGGCTGCTGGATGCTCTATGAGCAGCCCAACTTCGCAGGCTGCCAGTACTTCCTGCGTCGCGGGGACTACCCTGACTACCAGCAGTGGATGGGTTTCAGTGACTCTGTCCGCTCCTGCCACCTCATCCCCCACTCCACTTCTCACAGGATCAGGATCTACGAGCGAGAGGACTACAGAGGCCAGATGGTGGAGATCACAGACGACTGCTCCCACCTGCAGGACCGCTTCCACTTCAGTGACTTCCACTCCTTCCACGTGATGGAGGGCTACTGGGTCCTC…
ENSMUSG00000002010	Idh3g	0.3586614147350513	isocitrate dehydrogenase 3 (NAD+), gamma [Source:MGI Symbol;Acc:MGI:1099463]	ATGGCGCTGAAGGTGGCGATAGCTGCTGGCGGTGCTGCAAAGGCAATGCTCAAGCCAACTCTCCTCTGCCGTCCTTGGGAGGTTCTGGCTGCCCATGTGGCCCCCCGAAGGAGCATTTCCTCACAACAAACAATTCCTCCATCTGCTAAGTATGGTGGGCGGCATACAGTGACTATGATCCCAGGGGATGGCATCGGCCCAGAGCTCATGTTGCATGTTAAGTCTGTATTCAGGCATGCATGTGTGCCGGTGGACTTTGAAGAGGTGCATGTAAGCTCCAACGCTGATGAGGAGGACATCCGCAATGCCATCATGGCCATCCGCCGGAACCGTGTGGCCCTGAAGGGCAACATTGAAACAAATCATAACCTGCCACCATCCCACAAATCTCGAAACAAC…
ENSMUSG00000029184	Olfr109	-0.06460044768120773	olfactory receptor 109 [Source:MGI Symbol;Acc:MGI:2177492]	ATGGAGAACTCCACTTCAGTGGATGAGTTTCTCTTGCTTGGCCTGACCAGTGTTCAAAAGCTGCAGCCCATCATTTTTGTGATGTTTTTAACCATTTACTTACTGAATTTGGTTGGAAATGGAGTTATATTAATGATCGTCACTCTGGAAAGAAGACTCCACTCCCCTATGTACTTCTTCCTAGGAAACCTTTCTTGCCTGGATATTTGTTACTCATCGGTGACTCTTCCCAAGGTTCTCATCAACCTTCTCTCGAGGCGTAGGGCCATATCATTCCTAGGCTGCATCACTCAGCTCTACTTCTTTCACTTTCTGGGAAGTACGGAGGCCATCTTGCTGGCTGTGATGGCCTTTGACCGATTTGTGGCCATCTGCAGCCCACTTCGCTACACTGCTATC…
ENSMUSG00000026824	Kcnj3	0.030926697990452025	potassium inwardly-rectifying channel, subfamily J, member 3 [Source:MGI Symbol;Acc:MGI:104742]	ATGTCTGCACTCCGAAGGAAATTTGGGGACGATTACCAGGTAGTGACCACTTCGTCGAGCGGTTCGGGCTTACAGCCTCAGGGGCCAGGACAGGGCCCGCAGCAGCAGCTGGTGCCCAAGAAGAAACGGCAGCGGTTCGTGGACAAGAACGGCCGGTGCAATGTGCAGCATGGTAACCTGGGCAGCGAGACCAGTCGCTACCTTTCGGACCTCTTCACTACCCTGGTGGATCTCAAGTGGCGTTGGAACCTCTTTATCTTCATCCTCACCTACACCGTGGCCTGGCTCTTCATGGCGTCCATGTGGTGGGTGATCGCTTATACCCGGGGCGACCTGAACAAAGCCCATGTCGGCAACTACACTCCCTGTGTGGCCAATGTCTATAACTTCCCCTCTGCC…
ENSMUSG00000091017	Fam71a	-0.43438645221283767	family with sequence similarity 71, member A [Source:MGI Symbol;Acc:MGI:3588202]	ATGGACGTAAAGGAAGAGTCTCTGTTACCATATTATACAGCCCAGAGTGGTGCTGAAGTCGGCATGTTCAACGGCTTGTTCGACACCGCCACGGGGAAATTACAGCAGCAGTTGCACAAAGGAGAGTATGATATATTCAAGTACGCGCCGATATTCGAGAGCGACTTCATCCAGATCACCAGATATGGAGAAGTGATCGACGTGCACAATCGTGTCCGAATGGTGACTGTGGGCATTGCGTGCACCAGTCCCATCCTTCCACTCCCTGATGTCATGCTGCTGGCCCGACCAGCACCATTCGATGAGCTTCTGGGACATGGCCAGTCCACCAACAGCACCAAAGGCAAAAAACGCAAGGCTGGAAAGACCTTGGAGCTCACTAGGCTCCTTCCTTTGAAG…
ENSMUSG00000039096	Rsad1	-0.23284418096710277	radical S-adenosyl methionine domain containing 1 [Source:MGI Symbol;Acc:MGI:3039628]	ATGGTTCCCTCCGGGGTCCGGACCGGCAGATGGGTGGCAGCGGCCAGGGCGGCCCAGCGGCGCCCCCGTGTGGACAGCTTGGGACAGCCTCCGAGTCCTGAGTCCGCGAGCACGCGTGCGGCGCTTTACGTGCACTGGCCTTATTGCGAGAAACGCTGCAGCTACTGCAACTTCAATAAGTACATCCCCCGCGGCGTGGAGGAGGGGACCGTGCGGAATTGCCTGGTGACTGAGGCAAGGACGCTGCTGCGGCTCAGCGGGGTGCAGAGAGTAGAGTCTGTGTTCTTTGGTGGAGGAACCCCGAGTCTGGCCAGTCCCCACACTGTGGCTGCTGTCCTGGAGGCTGTGGCTCAGGAAGTCTACCTGCCTGCCGATTCGGAAGTCACCTTGGAGGCTAAC…
ENSMUSG00000034684	Sema3f	0.2939779142792358	sema domain, immunoglobulin domain (Ig), short basic domain, secreted, (semaphorin) 3F [Source:MGI Symbol;Acc:MGI:1096347]	ATGCTTGTCACTGCCTTCATCCTCTGGGCTTCCCTGCTGACCGGGGCCTGGCCTGCTACCCCTATCCAGGACCAGCTTCCAGCCACACCTAGAGTCCGACTGTCATTCAAAGAACTTAAGGCCACCGGTACCGCCCACTTCTTCAACTTTCTGCTCAACACTACAGACTACAGAATCCTGCTCAAGGATGAGGACCATGACCGCATGTATGTGGGCAGCAAGGACTACGTGCTGTCCCTGGACCTGCATGACATCAACCGAGAGCCCCTTATTATCCATTGGGCAGCCTCCCCGCAGCGCATTGAGGAGTGCATACTGTCAGGCAAGGATGGCAATGGAGAGTGTGGTAACTTCGTCCGGCTCATCCAGCCTTGGAACCGAACACACCTGTATGTGTGT…
ENSMUSG00000078906	Gm14444	-0.7584411584387408	predicted gene 14444 [Source:MGI Symbol;Acc:MGI:3652325]	ATGAATTTAATCACCTATGATGACGTGCATGTGAACTTCACTCAGGAAGAGTGGGCTTTGCTGGATCCTTCTCATAAAAATCTCTACAAAGATGTGATGGTAGAGACCTATAGGAATCTCACAGCTATAGGTTACATTTGGGAAGAACATACAAGTGAAGACCATTTTCAAAATTCTAGAAGTCATGGAAGGCATGAAAGAAGTTGTTCTGCAGAGCAACTCTCTGAGTTTATTCACTGTGGTAAAGCCTTTGCATATGAGAGTGGTAGTCAAAGGCATCAAATAAAACATACTGGAGAGAAACACCATGACTGTAACCAATGTGGTAAAGCTTTTAAAAGAAGGAGTGACATCCAAATACATAAGCAAACACATACAGGAGAGAAACCCTATGAATGT…
ENSMUSG00000043911	Olfr922	-0.18226848949747296	olfactory receptor 922 [Source:MGI Symbol;Acc:MGI:3030756]	ATGGACACTAAAAATATTTCCTTCATTACTGAGTTTATCCTGGTTGGCTTAACAGAATATACAGAGACTCATTTCCCCTTTTTCTTCCTCTTCCTAGGCATCTATGCTATCACAGTGGCAGGAAACCTGGGCCTGCTCACTCTGATTGGAATGAATTCCCCTCTTCACACTCCTATGTACTACTTCCTCTTTAATTTATCTTTCATTGATCTCTGTTACTCTACTGTTATTACTCCAAAACTGTTAGTAAACTTTGTTTCTGAGAGGAACACAATTTCCTATGAAGGATGCATGACTCAGCTCTATTTCTACTGCTTCTTTGTCAGTGCAGAATGCTATGTGTTGACAGTGATGGCATATGATCGCTATGTGGCCATCTGTAAGCCCCTGTTGTACACT…
ENSMUSG00000031410	Nxf7	-0.23794369562022952	nuclear RNA export factor 7 [Source:MGI Symbol;Acc:MGI:2159343]	ATGTGCTCTAATGAAAGGAAGCAGGGGTCCTTCAGATACACAGGAACAACTAATGCCTGGCAAAGCCCCATGGGAAGAAAGAAAGACAGGGTTTCTTCCCTGAGCTATGCTGGCAAGAGGACCGATCATTATGAGCATACTGGGCACACGATTCTGCCTTTCAAAGCCCAGAGTGATGGTGGAAATCTGGAGATGAGAGCTGTTCTCTGGAACCCGTCAGTAAGACACACACCTTATGTTGGGCAACATAGGAGTAGGGAGGAAGAGCATATGGAAGACCAAATCCATGTCACGGCGCAGAGAGATGACAAACCTGAACAGAGAGAAGCAGGGCAGTTCACAGAAGACGGAGAACTGGGGAGCTGGTTCAAGGTCACGGTTCCATGTGGGAGGAAGTAT…
ENSMUSG00000028862	Map3k6	-0.3393218176045042	mitogen-activated protein kinase kinase kinase 6 [Source:MGI Symbol;Acc:MGI:1855691]	ATGGCGGGGCCATGTCCTGGGGCCGGGGTTCTAGAACGGGCGGGCAGCTGCTGGCAGGACCCGCTGGCGGAGGCGCTGAGCCGGGGCCGCTCGTCTCCTGCGGTCACGGGTCGGGGCTGCGCGCGGAGCCGGCCTCTCAGTGTGGTCTACGTGCTGACCCGGGAGCCGGGGCTCGGGGTGGAGCCCGGGTCGGGAACCGAGGCAGAGCCGCTGCCGTTGCGATGCCTGCGCGAGGCCTGCGCTCAGCTCCAGGGCACACGGCCACCCCCGCAGCTACGCAGCCTACCCTTTGCGACGCTGGCGCTAGGCGACACCGCTGCGCTGGACTCCTTCTACAACGCGGATGTAGTGGTGCTGGAGGTGAGCAGCTCCCTGGCACAGCCTTCCTTGTTCTACCAC…
ENSMUSG00000044798	Olfr923	0.03140708930538896	olfactory receptor 923 [Source:MGI Symbol;Acc:MGI:3030757]	ATGAAGATCTACAGAAGAATGACACATGGAAATTACTCCCTGGTGACAGAATTTATCCTGGAGGGCTTAACTAATCGGCCAGAACTCCAAATGCCTCTGTTTTTTCTGTTTCTAGGAATCTATGTGGTTACTATAGTGGCAAATCTGGGCTTAATTACACTGATTTCATTGAATACACACCTTCACACACCCATGTATTATTTCCTCTTTAACCTGTCATTTGTAGATATTTGTTACTCTTCTGTCTTTACCCCCAAAATGCTAATTAATTTTGTAGTAGAGAAGAACACCATCTCCTATACAGGCTGCTTGACTCAACTCTACTTCTTCTGCTTTTTCGTCATTACAGAATGTTATCTACTGACTGCAATGGCATATGACCGTTATGTTGCTATTTGC…
ENSMUSG00000058670	4932411N23Rik	-0.014095565605258906	RIKEN cDNA 4932411N23 gene [Source:MGI Symbol;Acc:MGI:3045322]	ATGAGCTCTGTCTTACTTAGTGAGGACTCAGACAGGAACCTCATGCTTTGCCTTCAGAATGAAGCTAATGAAATGGAAAATCCTACTGAACCTCTGAATAAGAGGCCTTGTTTGTCCTCTGAAGTTGATTCTACTTCGTATATGTCAGCTCTTGAATTCCCACTACAAGAAATGGAGCAAAGTTTTGGTTTGGTCACAACCACAGCCACAGAGGTGGCTGAGGAAGAGTTTGGTGGGGAAAATATGATGCAATTCGAGGTTTTAAAAGATGACAAACAATATGAAGTTTTCCCCTTGCCTAACAAGGAAGAGTCAGTAGTTAGCCAAGCATGGTTCACAAGTAAGGAAGCTAAGGATGCTCTAACTCATCAAGGACAGAAATGGAAGCAGGGGATGTGG…
ENSMUSG00000035946	Gsx2	-0.6908974296834426	GS homeobox 2 [Source:MGI Symbol;Acc:MGI:95843]	ATGTCGCGCTCCTTCTACGTGGACTCACTCATCATCAAGGACTCCTCACGGCCCGCACCCTCGCTGCCGGAATCGCACCCAGGGCCGGATTTCTTCATCCCGCTGGGCATGCCGTCCCCGTTGGTGATGTCAGTGTCCGGGCCTGGCTGTCCGTCCCGCAAAAGCGGCGCTTTCTGCGTGTGCCCGCTTTGCGTCACCTCGCACCTGCACTCCTCTCGCCCGCCCGCAGGAGCTGGTGGCGGAGCTACGGGGACCGCGGGGGCTGCAGTGGCGGGCGGCGGGGTGGCTGGAGGCACCGGCGCTCTACCTTTGCTCAAAAGCCAGTTCTCTCCCGCTCCTGGGGACGCGCAGTTTTGCCCACGGGTGAGCCACGCACACCATCACCACCACCCACCACAG…
ENSMUSG00000078905	Gm14393	-0.5319449149527816	predicted gene 14393 [Source:MGI Symbol;Acc:MGI:3649576]	ATGGATTTAGTCACCTATGATGACGTGCATGTCAACTTCACTCAGGAAGAATGGGCTTTGCTGGATCCTTCTCAGAAGAGTCTCTACAAAGGTGTGATGCTAGAGACCTATAGGAATCTCACAGCTATAGGTTACATTTGGGAAGAACATACAATTGAAGACCATTTCCAAACTTCTAGAAGTCATGGAAGGCGTGAAAGAAGTTGTACTGCAGAGCAACCCTCTGAGTTTATTCAATGTGGTAAAGCCTTTGCATATGAGAGTTGTAGTCAAAGGCATCAAATTAAACATAATGGAGAGAAACACCATGACTGTAACCAATGTGGTAAAGCTTTTAAAAGAAGGAGTGACCTCCAAATACATAAGCGAACACATACAGGAGAGAAACCCTATGAATGT…
ENSMUSG00000028161	Ppp3ca	-0.11730247631201526	protein phosphatase 3, catalytic subunit, alpha isoform [Source:MGI Symbol;Acc:MGI:107164]	ATGTCCGAGCCCAAGGCGATTGATCCCAAGTTGTCGACGACCGACAGGGTGGTGAAAGCCGTTCCATTTCCACCAAGTCACCGGCTGACAGCAAAGGAAGTGTTTGATAATGATGGGAAACCTCGTGTGGATATCTTAAAAGCACATCTCATGAAGGAGGGCAGGCTGGAAGAAAGTGTTGCATTGAGAATAATAACAGAGGGTGCTTCGATTCTCCGACAGGAAAAAAACTTGCTGGATATCGACGCACCAGTCACAGTTTGTGGGGACATCCATGGACAATTCTTTGACTTGATGAAGCTCTTTGAAGTGGGAGGATCTCCTGCCAACACTCGCTACCTCTTCTTAGGGGACTATGTTGACAGAGGGTACTTCAGTATCGAATGTGTGCTGTATTTG…
ENSMUSG00000020246	Hcfc2	-0.3643564226967161	host cell factor C2 [Source:MGI Symbol;Acc:MGI:1915183]	ATGGCGGCTCCCAGCCTCCTCAACTGGAGGCGGGTTTCCTCCTTTACCGGACCGGTGCCTCGCGCCCGGCACGGACACCGAGCCGTGGCCATCCGGGAGCTGATGATCATCTTCGGCGGGGGCAACGAGGGCATCGCGGACGAGCTGCACGTCTACAATACCGTTACAAACCAGTGGTTCCTACCAGCTGTTAGAGGAGACATCCCTCCAGGCTGTGCAGCCCATGGATTTGTCTGTGATGGGACTAGAATCCTAGTGTTTGGGGGAATGGTTGAATATGGAAGATACAGCAATGAGTTATATGAGTTACAAGCAAGTCGTTGGTTATGGAAAAAAGTGAAACCCCAGCCCCCTCCTTCTGGTTTCCCTCCTTGTCCGCGGCTTGGACATAGCTTCTCT…
ENSMUSG00000033105	Lss	0.20245423676630384	lanosterol synthase [Source:MGI Symbol;Acc:MGI:1336155]	ATGACTGAGGGCACGTGTCTGCGGCGTCGTGGGGGACCCTATAAAACTGAGCCCGCCACCGATCTCACCCGCTGGCGGCTCCAGAATGAGTTGGGTCGGCAGAGATGGACTTATTATCAAGCGGAGGACGACCCTGGTCGAGAGCAGACCGGGCTAGAGGCCCACTCTTTGGGACTGGACACAAGAAGTTATTTCACGGACTTACCAAAAGCGCAAACAGCCCATGAGGGGGCCCTGAATGGAGTAACCTTTTATGCCAAGCTGCAGGCTGAGGATGGACACTGGGCTGGTGATTATGGTGGTCCGCTCTTCCTCTTGCCAGGTCTCCTGATTACCTGTCACATATCACACATCTCTCTGCCAGCTGGATACAGAGAGGAGATGGTGCGGTACCTGCGG…
ENSMUSG00000027434	Nkx2-2	-0.8111878137440397	NK2 homeobox 2 [Source:MGI Symbol;Acc:MGI:97347]	ATGTCGCTGACCAACACAAAGACGGGGTTTTCAGTCAAGGACATCTTGGACCTTCCGGACACCAACGATGAAGACGGCTCGGTGGCCGAAGGGCCAGAGGAGGAGAGCGAAGGGCCGGAGCCCGCCAAGAGGGCCGGGCCGCTGGGGCAGGGCGCCCTGGACGCTGTGCAGAGCCTGCCCCTTAAGAGCCCTTTCTACGACAGCAGCGACAACCCCTACACTCGCTGGCTGGCCAGCACCGAGGGCCTCCAATACTCCCTGCACGGGCTGGCGGCCAGCGCTCCCCCCCAAGACTCGAGCTCCAAATCCCCAGAGCCCTCGGCTGACGAGTCACCGGACAATGACAAGGAGACCCAGGGCGGCGGGGGGGACGCAGGCAAGAAGCGGAAGCGCCGAGTG…
ENSMUSG00000022401	Xpnpep3	-0.09003561674952251	X-prolyl aminopeptidase 3, mitochondrial [Source:MGI Symbol;Acc:MGI:2445217]	ATGCCGTCTCTGCTCTCAACCCCCAAGCTGGCTCCCGTTCTAGCAAGGCTCCGCGGCCTCTCAGGATGCATGTCATGTTTACAGCGAAGGTACTCCCTCCAGCCTGCGCCGGTAAAGAAGATTCCAAACCGGTACTTAGGCCAGCCCAGCCCGGTTACACATCCACACCTCCTCAGACCAGGGGAGGTGACACCAGGGCTATCTCAGGTGGAATATGCACTTCGAAGACATAAACTTATGGCTCTGGTCCACAAAGAAGCACAAGGGCACAGTGGAACAGACCACACAGTGGTGGTACTCTCTAACCCTACGTACTATATGAGCAACGACATCCCCTACACATTCCATCAAGACAACAACTTCCTGTATCTCTGTGGATTCCAAGAGCCTGATAGCATT…
ENSMUSG00000022270	Retreg1	-0.09656840961144039	reticulophagy regulator 1 [Source:MGI Symbol;Acc:MGI:1913520]	ATGGCGAGCCCGGCGCCCGAGGAGCACGCCACACAAGGATGCCCGGCTACCGAGGAGCAGCCGCCGCGGCCTGGAGTTCCCGGAGAGGAAGCAGGGCCAGAGGGCGCGGGGCCGCAGGTGGAGGAGGCCGCCGGGAGGGTGGCCGCCGCCCTGACCTGGCTGCTCGGGGAACCCGTGCTGTGGCTGGGCTGGCGCGCAGACGAGCTCCTGAGCTGGAAGAGGCCGCTGCGCAGCCTGCTCACCTTCCTGGGTGCCAACCTGCTGTTCTGGTTCCTTGCCTTGACTCCTTGGAGAGTGTATCACCTCATTTCCGTCATGATTCTTGGGCGTGTTATCATGCAGATCATCAAGGAAATGGTTTTGTCCAGGACAAGAGGTGCCCAGCTGTGGAGAAGCCTC…
ENSMUSG00000113558	Tmdd1	-0.5035970256802934	transmembrane and death domain 1 [Source:MGI Symbol;Acc:MGI:6097044]	ATGGTGTGGGCGCTGATCCTGGCCCTCTGTAACCGGTTGCTGCCCCTCACGAGCGCGCTGGACGCCATGGGCCCCCACACAGCAGTCCGCCTGGCGGAACTGCTGACCCCCGAGGAGTGCAACCACTTTCGTTCACTCCTCGAGGTACCCGAGCCCGACCTGGACAAGGAGTTGGCCCGGTTATCTGAGGACTTGCTGGCGACGCCCGAGCCACCCGCATCCCGGCGTGGGGCGCAGGACTCGGTGGGACAACAGCGGCGGGCGGCAGCGGAGCTGGTCCGGCTATCTGCGGACCGGCGGGCAACGCCCGAGCCACCCACACCCTCGCTTAGGGCGCAGGACTCGGTGGGAGAGCCGCTGCGGGCCACAACCGCGCAGGCTTCGGAGGGGAGGGAGGGC…
ENSMUSG00000095440	Fignl2	-0.2899658234982413	fidgetin-like 2 [Source:MGI Symbol;Acc:MGI:3646919]	ATGCACTGGACACCGGAACACGCCCAGCCCCTAAACCAGTGGCCAGAGCAGCACCTGGACGTCTCCTCCACCACTCCGTCGCCGGCTCACAAGTTGGAGTTGCCTCCAGGGGGTCGCCAGCGCTGCCACTACGCTTGGGCACACGACGACATTTCCGCCCTCACAGCCTCCAACCTCCTCAAGCGCTACGCCGAGAAGTACTCCGGAGTCCTGGACTACGAGCGCCCGGGCCTGGGCAGCTACGGTGACGCCGCCTTCCTCAACGGTGCCAAAGGGGACCCGGAGCCCTGGCCCGGGCCAGAGCCACCTTACCCTCTAGCCTCGCTCCACGAAGGCCTCCCGGGAGCCAAGGCGGCTGGCGCGGGTGGCTCCGCCGGCCTCGGGGGCTCCCCGGTAGTA…
ENSMUSG00000020900	Myh10	0.3251677933164778	myosin, heavy polypeptide 10, non-muscle [Source:MGI Symbol;Acc:MGI:1930780]	ATGAGAATGGAGATCTGGGGATGGGGATGTAGGGACCAACTCCTGGTTGCATTGGATCCCTGGAAGCGTGGGGTTGGGAGAGGCAATTACTTTTGGGTCCTTCTGTTTACAATGGCCCAGAGAACTGGACTGGAGGATCCCGAGAGGTATCTCTTTGTGGACAGGGCTGTCATCTACAACCCTGCCACTCAAGCTGACTGGACAGCTAAAAAGCTGGTGTGGATTCCATCGGAACGCCATGGTTTTGAGGCAGCTAGTATTAAAGAAGAGCGGGGCGATGAGGTTATGGTGGAGCTGGCAGAGAATGGGAAGAAAGCAATGGTCAACAAAGATGACATTCAGAAGATGAACCCACCAAAGTTCTCCAAGGTGGAGGATATGGCAGAGCTGACATGCTTG…
ENSMUSG00000031931	Ankrd49	0.01931910444298737	ankyrin repeat domain 49 [Source:MGI Symbol;Acc:MGI:1930842]	ATGGAAAAAGAAAAAAAGGATGATGAAAAACCAGACCTGGAAAACTCTGTGGACTTTTCTGAACAGTTTAACCAGCTTGAATTGTTGAAAACTCATGGACACCTGATTCCCACTGGTACTCAGAGTCTCTGGGTAGGCAATTCTGATGAAGATGAAGAGCAAGAGGAAAAAAACGAAGAGTGGTACCAATTGCAAGAAAAAAAGATGGAAAAAGATCCAAGCAAATTGCTTCTTTGGGCTGCTGAAAAAAATCGGCTTGCTACAGTGCAGAGACTACTCTCTGAGAAGGCCGCTGAAGTGAACACTAGGGATGAAGATGAGTATACCCCTCTTCACCGAGCAGCCTACAGTGGGCATATAGATGTTGTTCGTGAGCTGGTGGCTAAGGGGGCAGATGTT…
ENSMUSG00000042901	Aida	-0.2531899119349369	axin interactor, dorsalization associated [Source:MGI Symbol;Acc:MGI:1919737]	ATGTCGGAGGTGACCCGGAGTCTGCTGCAGCGCTGGGGCGCCAGTCTTAGGAGAGGCGCCGACTTCGACTCTTGGGGCCAGCTGGTGGAGGCGATAGACGAGTATCAGATATTAGCAAGACACTTACAGAAGGAGGCCCAAGCTCAACACAATAATTCTGAATTTACAGAAGAACAAAAGAAAACCATAGGCAAAATTGCGACATGTTTGGAATTGCGAAGTGCAGCATTACAGTCCACACAGTCCCAAGAAGAGTTTAAACTGGAGGACCTGAAGAAGCTAGAACCAATCCTGAAGAATATTCTTACATATAATAAAGAATTCCCATTTGATGTTCAGCCTATTCCATTAAGACGTATTTTAGCACCTGGTGAAGAAGAGAATTTGGAATTTGAAGAA…
ENSMUSG00000047034	Ankrd33	-0.3970585399542482	ankyrin repeat domain 33 [Source:MGI Symbol;Acc:MGI:2443398]	ATGTCTGAGGCCCTGCCCTTCCCCAGCAACAAGACCTCAACCCCTGAATGCAATTTGAAGACACTGTACTGGGCATGTGTCCACAATGACCTTGCTGAGCTCCAAGCCAGGCTGGACGCTGGTGTGTCCCCAGAGGAGGCCTCCCAAGTGGACAGCAACGGGAGGACAGGCCTCATGGTTGCATGCTACCATGGCTTTGGTTCCATTGTGGCTCTGCTCAGCTGCTGTCCTTTCCTGGATGTGAACCAGCAAGACAAAGACGGGAACACAGCCCTCATGCTGGCTGCCCAAGCAGGTCACATGTCTCTTGTGACTCTCCTGCTCAACTACTTTGCTGGCCTGGACCTGGAACGCAGGGACCAGCGGGGACTCACAGCTCTGATGAAGGCTGCCATTCAA…
ENSMUSG00000033066	Gas7	-0.20462037294324328	growth arrest specific 7 [Source:MGI Symbol;Acc:MGI:1202388]	ATGGCCGGCGCCCGCTGCCGGACCCTGTACCCCTTCTCCGGGGAGCGGCACAGCCAGGGGCTGCGCTTCTCTGCGGGCGAGCTGCTCACGCTGCTCCAGGTCCCGGACGGCGGCTGGTGGGAAGGCGAAAAGGACGACGGGCTCCGTGGCTGGTTCCCCGCCAGCTACGTGCAACTACTAGAGAAGCCTGGGATGGTCCCCCCTCCGCCAGGAGAGGAGAGCCAGACGGTCATCCTTCCACCCGGCTGGCACAGCTACTTGTCTCCTCAGGGCCGCCGTTACTATGTCAACACGACTACCAATGAGACCACCTGGGAACGTCCCAGCAGTTCTCCTGGGATTTCAGCCAGCCCTGGCCCTCACAGGAGCTCTTTGCCTACAACAGTGAATGGATACCAC…
ENSMUSG00000022682	Rrn3	-0.15887633025164902	RRN3 RNA polymerase I transcription factor homolog (yeast) [Source:MGI Symbol;Acc:MGI:1925255]	ATGGCGGCCCCGCTGCTTCACACGCGCTTGTCGGGCGATGTGACGGCAGCGGCCTCTGCCACGCTGAGTGCGTCGCGGACTGGGCTTTCCGATATGCTCGCGTTAGAGAGCGATTTCTTCAATTCTCCTCCGAAAAAAACTGTTCGGTTTGGCGGAACTGTGACAGAAGTCTTACTGAAATACAAAAAGGGTGAAACAAATGACTTAGAGTTGTTGAAGAACCAGCTGTCTGATCCTGATATAAAGGATGACCAGATCATTAACTGGCTACTAGAATTTCGTTCCTCTGTCATGTACTTGACAAAAGACTTTGAGCAACTTATAAACATCATATTGAGATTGCCCTGGTTGAATAGAAGTCAGAGAGTGGTGGAGGAGTATTTGGCTTTTCTTGGTAAT…
ENSMUSG00000016283	H2-M2	0.32917291370864543	histocompatibility 2, M region locus 2 [Source:MGI Symbol;Acc:MGI:95914]	ATGGAGACTTCAGCATTCTTCACTCTCCTCTTCACTCTCTACCTGCTGCTTGGGGCTTCCCTTGCCCTGGCACAGACCTTTAAAGGATCCCACTCCTTGCGGTACTTCGACATCGCAGTGTCAAGACCTGGCCTAGAGGAGACCCACTACATGACTGTTGGCTATGTGGATGACACAGAGTTTGTGCATTTTGACAATGAGGCTGAGAATCCGAGGTTTGAGCCCCGAGTGCCTTGGATGGAACAGATGGGACAGAAGTACTGGGATGACCAGACACGCATTGCGAAAGCTGCAGAACAGCAGATTAGAGTGTACTTTCAGAAACTGCGAGACTACTACAACCAGAGCCAGAACAGTTCTCACACCATCCAAAGGATGACTGGCTGCTACATTGGACCA…
ENSMUSG00000040521	Tsfm	-0.025555936572355085	Ts translation elongation factor, mitochondrial [Source:MGI Symbol;Acc:MGI:1913649]	ATGTCGCTTCTGCGGTCGCTGCGCTTCTTCCCGGTCGCGTGCACCGGCCGCTCGGCGAGGGCTGTCCTGCTCCAGCCGTCCCAGCCATGGCTCACGTTTCACGCCGGCCCCTCGCTGTCCTCTGCTGCCTCCAGCAAGGAGCTCCTTATGAAACTGCGGCGGAAAACCGGCTACTCCTTTGTCAACTGCAAGAAGGCTCTGGAGACTTGTGGCGGTGACCTCAAGCAGGCAGAGGACTGGCTGCACAAACAGGCCCAGAAGGAAGGATGGAGCAAAGCCGCCAAGCTCCACGGGAGGAAGACTAAAGAAGGCTTGATTGGACTTCTGCAGGAGGGAAACACAGCTGTTTTAGTAGAGGTAAACTGTGAGACAGATTTTGTCTCCAGAAATTTAAAATTT…
ENSMUSG00000003882	Il7r	-0.5116943152822312	interleukin 7 receptor [Source:MGI Symbol;Acc:MGI:96562]	ATGATGGCTCTGGGTAGAGCTTTCGCTATAGTTTTCTGCTTAATTCAAGCTGTTTCTGGAGAAAGTGGAAATGCCCAGGATGGAGACCTAGAAGATGCAGACGCGGACGATCACTCCTTCTGGTGCCACAGCCAGTTGGAAGTGGATGGAAGTCAACATTTATTGACTTGTGCTTTTAATGACTCAGACATCAACACAGCTAATCTGGAATTTCAAATATGTGGGGCTCTTTTACGAGTGAAATGCCTAACTCTTAACAAGCTGCAAGATATATATTTTATAAAGACATCAGAATTCTTACTGATTGGTAGCAGCAATATATGTGTGAAGCTTGGACAAAAGAATTTAACTTGCAAAAATATGGCTATAAACACAATAGTTAAAGCCGAGGCTCCCTCT…
ENSMUSG00000078945	Naip2	-0.408559754198038	NLR family, apoptosis inhibitory protein 2 [Source:MGI Symbol;Acc:MGI:1298226]	ATGGCAGCCCAGGGAGAAGCCGTTGAGGAGATAATTTGTGAGTTTGATGACGACTTGGTCTCTGAGCTCTCTACTCTTCTCAGAGTGGATGCACTTTCAGTCTTGAAGAGACAACAAGAAGAAGACCATAAAACACGAATGAAAATGAAGAAAGGTTTTAACTCACAGATGCGCAGTGAAGCCAAACGACTAAAGACTTTTGAGACCTATGACAAGTTCAGATCATGGACGCCACAGGAGATGGCAGCTGCTGGGTTTTACCACACAGGGGTGAAACTTGGGGTTCAGTGCTTTTGCTGTAGCTTGATCCTCTTTTCCACCAGACTCAGGAAACTTCCCATAGAGAACCACAAGAAATTACGACCAGAATGTGAGTTCCTTCTGGGCAAAGATGTTGGT…
ENSMUSG00000025935	Tram1	0.024268056516962757	translocating chain-associating membrane protein 1 [Source:MGI Symbol;Acc:MGI:1919515]	ATGGCGATTCGCAAGAAGAGCAACAAGAACCCGCCGCTGCTGAGCCACGAATTCTTGCTGCAGAATCACGCGGACATCGTCTCCTGCCTGGCGATGCTTTTCCTGCTGGGGCTTATGTTCGAGGTAACAGCAAAAGGAGCCATCATCTTTGTTGCTCTTCAGTATAATGTTACCCGCCCTGCAACAGAAGAACAAGCTACTGAATCAGCATCCCTATATCACTATGGTATCAAAGACTTGGCTACAGTTTTGTTCTACATGCTAGTGGCGATAATTATTCATGCCATAATTCAGGAGTATGTGTTGGATAAAATTAACCGACGGATGCACTTCTCCAAAACGAAGCACAGCAAGTTTAACGAGTCTGGTCAGCTCAGTGCATTCTACCTTTTTGCCTGT…
ENSMUSG00000021978	Extl3	0.09981543101938498	exostosin-like glycosyltransferase 3 [Source:MGI Symbol;Acc:MGI:1860765]	ATGACAGGCTATACCATGTTGCGGAATGGGGGAGTGGGGAACGGTGGTCAGACCTGTATGCTGCGCTGGTCCAATCGCATCCGGCTGACATGGCTGAGTTTCACGCTGTTCATCATCCTCGTCTTCTTCCCCCTCATTGCTCACTATTACCTCACCACTCTGGACGAGGCAGACGAGGCTGGCAAGCGCATCTTCGGCCCTCGGGCTGGCAGTGAGCTCTGTGAGGTAAAGCACGTCCTCGATCTCTGTCGGATTCGTGAGTCTGTGAGCGAAGAGCTTCTACAGCTCGAAGCCAAGCGGCAGGAGCTGAACAGCGAGATTGCCAAGCTGAACCTCAAGATTGAAGCCTGTAAGAAGAGCATAGAGAATGCCAAGCAGGACCTGCTGCAGCTCAAGAAT…
ENSMUSG00000003123	Lipe	-0.3230645541884908	lipase, hormone sensitive [Source:MGI Symbol;Acc:MGI:96790]	ATGAAGCCTAGGAGACCAATTTCTTTCCCAGGGGAAATAACAACTATGGACCCAAGTTCTCCCTCAGTATCTAGGCCAGAATGGAAACCTGAGACACAGGAGAGACCTATAATTAAGCCAGATCCTGGGCCAGAAACAACCCTCACAGACCACCCAGGATCAAAGATGCTGCAGGAATCTGGTACCCCACAGAAACAAAGTCTCCCAAATGAGCCCACTGCCCAGCAAGAAGCTGAATTCCAGCAGGAACAGGGAATCCAACAATCCGCTCTGCTTCAGAAATTTCTCACCCCATTCGCCTTCCCTGCACCACAGCAATCATCCCCAAGCCAGAAAGTACACTTGGATCAACAGGAAGCCATCTCCCCTAATGGACCTGGGGCAGGAAAAGTGTATACA…
ENSMUSG00000041309	Nkx6-2	-0.3054094878757093	NK6 homeobox 2 [Source:MGI Symbol;Acc:MGI:1352738]	ATGGACGCTAACCGCCCGGGTGCGTTTGTGCTGAGCAGCGCGCCTTTAGCCGCGCTGCACAACATGGCTGAGATGAAGACGTCGCTGTTCCCCTACGCGCTGCAGGGCCCGGCGGGCTTCAAGACACCCGCCCTAGGCAGCCTTGGCGCGCAGTTGCCTCTAGGCACTCCGCACGGCATCAGCGACATCCTGGGACGGCCGGTGGGCGCAGCGGGTGGCGGCCTCCTAGGAAGTCTGCCCCGTCTCAACGGGCTCGCCTCGTCTGCAGGTGTCTACTTCGGGCCCGCAGCCGCCGTGGCTCGGGGCTACCCCAAGCCGCTGGCGGAACTGCCTGGGCGCCCGCCCATCTTCTGGCCTGGGGTGGTGCAGGGCTCTCCCTGGAGGGACCCGCGACTGGCC…
ENSMUSG00000051036	Ttc24	-0.06840785910488031	tetratricopeptide repeat domain 24 [Source:MGI Symbol;Acc:MGI:2443841]	ATGCTGAGCAGTCGGCAGTATGGACTGAGTGATGTGCTGCGGGCTCTGGAGGAGAGCCGCAAGCTTGCTGATGCTGACCGGAGCACCGACCAGGGACTGCTAGGGCCATTCTACAATGATCTAGGCATGGGTTACTTCCAACTCCAACTGTTCCCTCTGGCAGTAGAGGCCTTCCTGCAGGCCCTACCCCTGTGTCGACAGCCATCAGAGCAGGCTACAGTGCTTCAAAATCTTGGAATGACCCACAATGTCCTTGGCAACTATTGGGAAGCCCAGGAGTTTCACCAGAAGGCTGCAAGTCTGCATGGCTCTGTGGGCCAGCGGTGGGAGCAGGGTCGCAGCTTTAGCGGCCTGGCATTTTCACTGAGCCAGCTGGGGGACCACAGGGCTGCCTGGGAC…
ENSMUSG00000061798	Olfr1204	0.19589307819128912	olfactory receptor 1204 [Source:MGI Symbol;Acc:MGI:3031038]	ATGGAAATTAAGAACAACGTGACAGAGTTTGTTCTCCTGGGGCTCACACAGAATCCGCAGTTGCAGAAAATCTTGTTTGTTGTGTTTTTGGTTATCTATGTTTTCTCTGTGGCAGGAAATTTGCTCATTCTAATCACCATTACAAACAGCCAACTGTTGGGGTACCCTATGTATTACTTCCTGGCCTATCTCTCTTTTATTGATGCTTGCTACTCCTCTGTCAATACACCTAAACTGCTTGCTGATACTTTCCATAAAAGGAAATCTATTAAATTCAATGGATGCATGACCCAAGTTTTTGCAGAACATTTCATTGGAGGAACTGAAGTCATCTTGCTTACTGTGATGGCTTATGACCGCTATGTAGCCATCTGTAAACCCCTGCACTATGCAACCATC…
ENSMUSG00000015766	Eps8	-0.4679776777159218	epidermal growth factor receptor pathway substrate 8 [Source:MGI Symbol;Acc:MGI:104684]	ATGAATGGTCATATGTCTAACCGCTCCAGTGGGTATGGAGTCTACCCTTCTCAACTGAATGGTTACGGATCTTCACCACCCTATTCCCAGATGGACAGAGAACACAGCTCAAGAACAAGTGCAAAGGCCCTTTATGAACAAAGGAAGAACTATGCCCGAGACAGTGTCAGCAGTGTGTCGGACGTGTCCCAGTACCGCGTGGAACACTTGACCACCTTCGTGCTGGATCGGAAAGATGCAATGATCACTGTCGAGGACGGAATAAGAAAGCTGAAGTTGCTGGATGCCAAGGGCAAAGTGTGGACTCAAGATATGATTCTCCAAGTGGATGACCGAGCTGTGAGCCTGATTGACTTAGAGTCAAAGAATGAATTGGAGAATTTTCCTCTAAACACAATC…
ENSMUSG00000048794	Cfap100	-0.08874898894870106	cilia and flagella associated protein 100 [Source:MGI Symbol;Acc:MGI:2141635]	ATGGCGTTCAAGGCACGGTCCTCTAGGTTCTCCGTGAAAATGGTTGAAGACACAGGAGGCAGCCAGGATTTAATAAACAACAGCTTCTCTTCCTTCATTGAAGAGAAGAGCAAAGAGTCAAAGAAAAACAAAGGGAATGTGACTATTTCTGACCGCTCAAGTAACCCTTTCCACATATCAAGGGACATGGATTACTTTTTGCTCAGAGAGCAGGAGCAGAATCAAGCTATTGCAGAGCGTGAACAAAAGAAGATTTTGAGAGTGCACCAGAAGATGACCTATGCATCCAAGGTATCGGCCAAGCACACTAGCCTGCGCCGGGAGCTACAGCTGGAAGATGAGATGGAACAGCAGCTGCTGAACGCTGAGGCCAAGGAGATGAACTGCTTCCGAGAAAAC…
ENSMUSG00000062103	Olfr924	0.1606815491424898	olfactory receptor 924 [Source:MGI Symbol;Acc:MGI:3030758]	ATGAATCATTCTTCAGTGATTGATTTTATCCTCGAAGGATTAACAAAACGCCCAGAGCTTCAGCTCCCACTGTTCCTCTTGTTTCTGGCAATATATGTGATCACAGTAGTGGGAAACTTGGGCATGATCCTCTTAATCACCATTAGTTCTCAACTTCACTCTCCAATGTATTATTTTCTCAGTCACTTATCCTTCATTGACCTCTGCTATTCCTCTGTCATTACACCAAAGATGTTGGTGAACTTTGTATGTGAGAAGAACACAATCTCCTTTTTGGAGTGCATGACTCAGCTTTACTTCTTCCTCATTTTTGTTATTGCAGAAGGCTACCTGCTGACAGCCATGGCCTATGACCGCTATGTTGCCATCTGTAGCCCACTGCTTTATAACATTGTCATG…
ENSMUSG00000068037	Mas1	-0.3844706994274575	MAS1 oncogene [Source:MGI Symbol;Acc:MGI:96918]	ATGGACCAGTCAAATATGACATCCCTTGCTGAAGAGAAAGCCATGAATACCTCCAGCAGAAATGCCTCCCTGGGGAGCTCACACCCACCCATTCCCATAGTGCACTGGGTCATCATGAGCATCTCCCCTCTGGGCTTTGTGGAGAATGGGATCCTCCTCTGGTTCCTCTGCTTCCGGATGAGGAGAAATCCCTTCACGGTCTACATTACCCACTTGTCCATTGCTGATATCTCTCTTCTGTTCTGTATTTTTATCCTGTCCATTGACTATGCTTTAGACTATGAACTCTCTTCTGGCCATCACTACACAATCGTGACATTATCGGTGACTTTTCTATTTGGCTACAACACGGGCCTCTATCTGCTGACAGCCATCAGTGTGGAGAGGTGCCTATCGGTC…
ENSMUSG00000040620	Dhx33	0.12304879965647145	DEAH (Asp-Glu-Ala-His) box polypeptide 33 [Source:MGI Symbol;Acc:MGI:2445102]	ATGCCGGAGGAGGCGAGCCTCCCGCCCGCTAAGAGATTCCGGCCGGGCTCCTGCCCTCCCGGGAGACGAGTAGTGATGCTGTTGACGGCTGGCGGCGGCGGCGGAGCTGGAGGAGGCCGGAGGCAGACGCCGCCGCTGGCCCAGCCTTCGGCCAGTCCCTACCGCGAGGCCCTGGAGCTGCAGCGCCGGAGTCTGCCCATCTTCCGGGCGCGGGGGCAGCTATTGGCTCAGCTCCGAAACCTGGACAACGCGGTCCTCATCGGGGAAACTGGCTCTGGGAAAACAACTCAGATCCCACAGTACCTCTATGAAGGGGGAATTAGCCGCCAGGGCATCATCGCTGTGACCCAGCCCCGTCGAGTGGCTGCCATCTCTCTTGCCACCAGAGTCTCAGATGAG…
ENSMUSG00000054203	Ifi205	-0.09410124668168293	interferon activated gene 205 [Source:MGI Symbol;Acc:MGI:101847]	ATGGAGAATGAATATAAGAGACTTGTTCTGCTGGAAGGACTTGAATGTATCAATAAGCATCAATTCAATTTATTTAAGTCATTGATGGTCAAAGATTTAAATCTGGAAGAAGACAACCAAGAGAAATATACCACGTTTCAGATTGCTAACATGATGGTAAAGAAATTTCCAGCTGATGCTGGATTGGACAGACTGATCAACTTTTGTGAACGTGTACCAACTCTTAAAAAACGTGCTGAAATTCTTAAAAAAGAGAGATCAGAAGTAACAGAAGAAACATCACTGGAAATAAATAGGCAAGAAGCAAGTCCTGCAACACCTACATCAACTACAAGCCACATGTTAGCATCTGAAAGAGGCAAGACTTCCACAACCCAGGAAGAGACTTCCACAGCCCAG…
ENSMUSG00000030897	Cnga4	0.3609708313177249	cyclic nucleotide gated channel alpha 4 [Source:MGI Symbol;Acc:MGI:2664099]	ATGAGCCAGGACAGCAAAGTGAAGACAACAGAGTCCACGCCCCCAGCCCCAACCAAAGCCAGGAAGTGGCTGCCAGTCCTAGACCCATCTGGGGATTATTACTACTGGTGGCTGAACACGATGGTCTTCCCAATCATGTATAATCTCATCATCGTTGTATGCAGGGCCTGCTTTCCTGACTTGCAACACAGTTACCTGGTGGCCTGGTTTGTGCTGGACTACACGAGTGACCTGCTGTACCTACTAGATATTGGGGTACGCTTCCACACAGGATTCCTAGAACAGGGCATCCTGGTGGTAGACAAAAGCATGATCGCCAGTCGCTATGTACGCACCTGGAGCTTCCTGTTGGACCTGGCTTCCCTGGTCCCCACAGATGCAGCCTACGTGCAGCTAGGC…
ENSMUSG00000040848	Sft2d2	0.24428710644059384	SFT2 domain containing 2 [Source:MGI Symbol;Acc:MGI:1917362]	ATGGACAAGCTGAAGAAAGTTCTGAGCGGCCAGGACACCGAGGACCGCAGCGGTCTGTCCGAGGTTGTGGAGGCGTCGTCGCTGAGCTGGGGCACCAGAATAAAAGGCTTCATCGCATGCTTTGCTCTGGGAATCCTGTGCTCAGTGCTGGGGACTCTTCTGCTGTGGGTGCCCAGGAAGGGACTCGGCCTCTTTGCAGTGTTTTACACCCTGGGTAACATCATGTCAATTGGGAGTACCGTCTTCCTCATGGGGCCGCTGAAGCAGCTGAAGCGCATGTTTGAGCCTACGCGTCTCATCGCCACAATTCTGGTGCTGCTGTGTTTTGCACTTACCCTGTGTTCTGCCTTTTTGTGGAATAAGGGACTTGCACTCATCTTCTGTATTTTGCAGTCTTTG…
ENSMUSG00000021264	Yy1	-0.06466120891516533	YY1 transcription factor [Source:MGI Symbol;Acc:MGI:99150]	ATGGCCTCGGGCGACACCCTCTACATCGCCACGGACGGCTCGGAGATGCCGGCCGAGATCGTGGAGCTGCATGAGATCGAGGTGGAGACCATCCCGGTGGAGACCATCGAGACCACGGTGGTGGGCGAGGAGGAGGAGGAGGACGACGACGACGAGGACGGCGGCGGCGGCGACCACGGCGGCGGCGGGGGCGGCCACGGGCACGCCGGCCACCACCATCACCACCACCACCACCACCACCACCACCCGCCCATGATCGCGCTGCAGCCGCTGGTGACGGACGACCCGACCCAAGTGCACCACCACCAGGAGGTGATCCTGGTGCAGACGCGCGAGGAGGTGGTCGGCGGGGACGACTCGGACGGGCTGCGCGCCGAGGACGGCTTCGAGGACCAGATC…
ENSMUSG00000031770	Herpud1	-0.37882494828575586	homocysteine-inducible, endoplasmic reticulum stress-inducible, ubiquitin-like domain member 1 [Source:MGI Symbol;Acc:MGI:1927406]	ATGGAGCCCGAGCCACAGCCCGAGCCGGTCACGCTGCTGGTGAAGAGTCCCAATCAGCGCCACCGCGACTTGGAGCTGAGTGGCGACCGCAGTTGGAGTGTGAGTCGCCTCAAGGCCCACCTGAGCCGAGTCTACCCCGAGCGCCCGCGTCCAGAGGACCAGAGGTTAATTTATTCTGGGAAGCTGCTGTTGGATCACCAGTGTCTCCAAGATTTGCTTCCAAAGCAGGAAAAGCGACATGTTTTGCACCTTGTGTGCAATGTGAAGAATCCCTCCAAAATGCCAGAAACCAGCACAAAGGGTGCTGAATCCACAGAGCAGCCGGACAACTCTAATCAGACACAGCATCCTGGGGACTCCTCAAGTGATGGTTTACGGCAAAGAGAAGTTCTTCGGAAC…
ENSMUSG00000029468	P2rx7	-0.10731450956815322	purinergic receptor P2X, ligand-gated ion channel, 7 [Source:MGI Symbol;Acc:MGI:1339957]	ATGCCGGCTTGCTGCAGCTGGAACGATGTCTTGCAGTATGAGACAAACAAAGTCACCCGGATCCAGAGCACGAATTATGGCACCGTCAAGTGGGTCTTGCACATGATCGTCTTTTCCTACATTAGCTTTGCTTTGGTGAGCGATAAGCTGTACCAGCGGAAAGAGCCTGTTATCAGCTCCGTGCACACCAAGGTCAAAGGCATAGCAGAGGTGACGGAGAATGTCACAGAGGGTGGGGTGACGAAGTTAGGACACAGCATCTTTGACACTGCAGACTACACCTTCCCTTTGCAGGGGAACTCATTCTTTGTCATGACAAACTATGTCAAGTCAGAAGGCCAAGTGCAGACGCTGTGTCCTGAGTATCCCAGGCGCGGTGCACAGTGCTCTTCTGACCGG…
ENSMUSG00000000530	Acvrl1	-0.43828784513675856	activin A receptor, type II-like 1 [Source:MGI Symbol;Acc:MGI:1338946]	ATGACCTTGGGGAGCTTCAGAAGGGGCCTTTTGATGCTGTCGGTGGCCTTTGGCCTAACCAGGGGAGACTTGGCGAAGCCTTCCAAGCTGGTGAACTGCACTTGTGAGAGCCCACACTGCAAGAGACCATTCTGCCAGGGGTCATGGTGCACAGTGGTGCTGGTTCGGGAGCAGGGCAGGCACCCCCAGGTCTATCGGGGCTGCGGGAGCCTGAACCAGGAGCTCTGCTTGGGACGTCCCACAGAGTTTCTGAACCATCACTGCTGCTATAGATCCTTCTGCAACCACAACGTGTCTCTGATGCTGGAGGCCACCCAAACTCCTTCGGAGGAGCCAGAAGTTGATGCCCATCTGCCTCTGATCCTGGGTCCTGTGCTGGCCTTGCCGGTCCTGGTGGCC…
ENSMUSG00000045381	Olfr433	-0.15201399862017526	olfactory receptor 433 [Source:MGI Symbol;Acc:MGI:3030267]	ATGGATCATGTCAACTACACCTGGACACGGACCTTCATCCTTGCTGGTTTCACTACCTCTGGTGCCCTCCGACCTCTTGCCTTCCTGGGGACCCTGTGCATCTATCTCCTCACACTGGCAGGGAACTTGTTCATCATTGTCTTGGTTCAGGCAGATTCAGGGCTGTCCACTCCCATGTACTTCTTTATCAGTGTCCTCTCCTTCCTGGAACTCTGGTATGTCAGCACCACAGTGCCCACCTTGCTGCACACCCTGCTCCATGGGCATTCACCCATCCCCTCGTCTGCATGCTTCGTCCAGCTGTATGTCTTTCACTCCTTGGGCATGACCGAGTGCTACCTGTTAGGTGTCATGGCTCTGGACCGCTACCTTGCTATCTGTCGTCCACTGCACTACCAT…
ENSMUSG00000021832	Psmc6	0.4031989328956781	proteasome (prosome, macropain) 26S subunit, ATPase, 6 [Source:MGI Symbol;Acc:MGI:1914339]	ATGGCGGACCCTAGAGATAAGGCGCTTCAGGACTATCGCAAGAAGCTGCTAGAGCACAAGGAGATTGACGGCCGTCTTAAGGAGCTAAGGGAACAATTAAAAGAACTTACCAAGCAGTATGAAAAGTCTGAAAATGATTTGAAGGCACTACAAAGTGTTGGACAGATTGTAGGTGAAGTGCTAAAACAGTTAACAGAAGAAAAATTCATCGTTAAAGCAACAAATGGACCAAGATACGTTGTAGGTTGTCGTCGTCAGCTTGACAAAAGTAAGCTGAAGCCAGGAACCAGAGTTGCTTTGGATATGACCACACTAACCATCATGAGATATCTGCCAAGAGAGGTGGATCCATTGGTTTATAACATGTCTCACGAGGATCCTGGAAATGTATCTTATTCT…
ENSMUSG00000056413	Adap1	0.2260541710821691	ArfGAP with dual PH domains 1 [Source:MGI Symbol;Acc:MGI:2442201]	ATGGCCGGGGAGCGGCGCCGGGCGCTGCTGGAGCTACTGACGCGGCCGGGGAACACGCGCTGCGCTGACTGCGGAGCCCCGGATCCTGACTGGGCGTCCTACACCCTGGGTGTGTTCATCTGTTTGAGCTGCTCTGGGATCCACCGGAACATCCCCCAGGTCAGCAAGGTGAAGTCAGTCCGTCTGGATGCCTGGGATGAGGCCCAAGTTGAGTTCATGGCATCTCATGGGAACGAGGCTGCCAGAGCCACATTTGAGTCCAAAGTACCGCCCTTCTACTACCGGCCCACGTTCTCCGACTGCCAACTCCTACGTGAGCAGTGGATCCGTGCCAAGTATGAGAGGCAAGAATTCGTTCATGTGGAGAAGCAGGAACCATACTCTACAGGCTACCGTGAG…
ENSMUSG00000059327	Eda	-0.0785496185665254	ectodysplasin-A [Source:MGI Symbol;Acc:MGI:1195272]	ATGGGCTACCCAGAGGTAGAGCGCAGGGAACCCCTGCCTGCGGCAGCGCCAAGGGAGCGGGGCAGCCAGGGCTGCGGCTGTCGCGGGGCCCCTGCTCGGGCGGGCGAAGGGAACAGCTGCCGGCTCTTCCTGGGTTTCTTTGGCCTCTCGCTGGCCCTCCACCTGCTGACGCTGTGCTGCTACCTAGAGTTGCGGTCCGAATTGCGGCGGGAACGGGGAACCGAGTCCCGCCTCGGTGGCCCGGGTGCTCCTGGCACCTCTGGCACCCTAAGCAGCCCTGGGAGCCTCGACCCGGTGGGTCCCATCACCCGCCACCTGGGGCAGCCGTCCTTTCAACAGCAGCCTTTGGAACCGGGAGAAGATCCACTCCCCCCTGACTCCCAGGACCGGCACCAGATG…
ENSMUSG00000068290	Ddrgk1	-0.016787284460255767	DDRGK domain containing 1 [Source:MGI Symbol;Acc:MGI:1924256]	ATGGTGGGGCCCTGGGTGTATCTGGTGGCGGCAGTTTTGCTCATCGGCCTGATCCTCTTCCTGACTCGCAGCCGGGGTCGGGCGGCAGCAGCTGACGGAGAACCACTGCACAATGAGGAAGAGAGGGCAGGAGCAGGCCAGGTAGGCCGCTCTTTGCCCCAGGAGTCTGAAGAACAGAGAACTGGAAGCAGACCCCGGCGTCGGAGGGACTTGGGCAGCCGTCTACAGGCCCAGCGTCGAGCCCAGCGAGTGGCCTGGGAAGACGGGGATGAGAATGTGGGTCAAACTGTTATTCCAGCCCAGGAGGAAGAAGGCATTGAGAAGCCAGCAGAAGTTCACCCAACAGGGAAAATTGGAGCCAAGAAACTACGGAAGCTAGAGGAAAAACAGGCTCGAAAG…
ENSMUSG00000047108	Dnajb7	-0.04764666846349072	DnaJ heat shock protein family (Hsp40) member B7 [Source:MGI Symbol;Acc:MGI:1914012]	ATGGTGGACTATTATGAAGTTCTAGGAGTGCAGAGATATGCGTCACCAGAAGACATTAAAAGAGCTTATCGTAAAGTAGCACTTAAATGGCATCCTGATAAAAATCCAGAAAATAAAGAGGAAGCGGAGCGAAAATTCAAAGAAGTCGCCGAGGCATATGAAGTGTTATCAAATGTTGAGAAACGGGACATTTATGACAAATACGGCAAGGAAGGATTAGACGGCAGAGGTGCAAGCCATCTCGACGATGAGCGTGAGTACCGCTTCACATTCCGGAAGGCAGACGATGTCTTTAAGGAAATTTTTGGTGAAAGGGATCCGTTTTCATTCCACCTCTTTGAGGACTCCCTCGAGGGCCTTTTAAACAGTTCAAGAAGCCCCAGTGGAAGCAGAGGCAGA…
ENSMUSG00000035878	Hykk	-0.12573310220623232	hydroxylysine kinase 1 [Source:MGI Symbol;Acc:MGI:2443139]	ATGTCAAGTGGAGCTGGCTGGCAGTCACAGGCTTCTGCCAAGCCCGTTTTTACTGAGGCACAAGCCTCTGCACTGGTAGAATCGGTATTTGGGTTCAAAGTTTCCAAGATCCAGCCACTCCCTAGCTATGAGGACCAAAACTTTCGTGTTCACATTGCAAGAGGCAAAGAGACTACAGATGACCCAGTTGAATATGTCCTCAAAATAAGCAATACGGAGTCTAGCCAAACTCCAGAGCTGATTGAAATGCAGAACCATGTCATCATGTTCCTGAGAGCAGCTGGATTCCCAACAGCCTCCGTATGCCGAACTAAAGGGGACAACACCATCTCTCTCATATCCATTGACAGTGGATCTGGAGTCAAAAGCTACTTGGTAAGAATGCTCACTTACCTCCCA…
ENSMUSG00000030292	Smco2	-0.23433355128387942	single-pass membrane protein with coiled-coil domains 2 [Source:MGI Symbol;Acc:MGI:1916621]	ATGATGTCTCTGCAGTTGGGGACAGCTGGGAAGGAACGTCAGCTGGCTGAGAAGAGCCGTGATCTCCAAAATGTCAGCATGACCGAAGGTTCGGAGGAAGTTTCGGAAATGGACCACATCTCAGACAGACCAGATGAAAAAGACAAACCTTCTGAAAACCTACAAACCGATTCCCTTTATAAGATGGACACTGAAAAATGGGATGGGTTGGAGCAGGAGTCCGAGCACAGCCAGGACCCACCAAGCAAACCCGATGAGCAAGAAGTGACTCTAGTTTGCGAGGGCCCTCAAGTGTCTCAGCTGTCACCGTCTACGGATGAGAGCACCCCGATCCCAGAGAGCTTGACCCACAAGCTGAACTACTGGCATGCAAAGATGGGTCTCCAAATGAAAGAACTC…
ENSMUSG00000090093	Gm14399	-0.5554239046934891	predicted gene 14399 [Source:MGI Symbol;Acc:MGI:3650082]	ATGGATTTAGTCACCTATGATGATGTGCAGGTGAACTTCACTCGGGATGAGTGGGCTTTGCTGGATCCTTCTCAGAAGAGTCTCTACAAAGGTGTGATGCTAGAGACCTATAGGAATCTCACAGCTATAGGTTACATTTGGGAAGAACATACAATTGAAGACCATTTTCAAACTTCTAGAAGTCATGGAAGGCATGAAAGAAGTTGTTCTGCAGAGCAACCCTCTGAGTTTATTCAATGTGGTAAAGCCTTTGCATATGAGAGTGGTAGACAAAGGCATCAAATTAAACATAATGGAGAGAAACACCATGACTGTAACCAATGTGGTAAGGACTTTAGAACATGGAATGTCCTGCAAATACATAAGCGAACACATACAGGAGAGAAACCCTATGACTGT…
ENSMUSG00000044309	Apol7c	0.16059237650379757	apolipoprotein L 7c [Source:MGI Symbol;Acc:MGI:1920912]	ATGAGCACCCCAGAGAGAAAGCGCTTCATTCCCACTGTGGCTCAGCACCTCCTGGACAGGAAGAGCCTAGAGGTCCTGCAGCTCCTGCTGACTGAAGAGGAAACCTGGAAACAGTTTGTGGCAGAAGTTGATTTGTCCAGGGAAGAGGAAGCTGCCTTGCGAGAGTCTCTTGCTGAGATCTTTGCAGATCCTGATGGAGAAGATGAAGATGAACTCCAAATTGACCTGCAGGACAAGAACGAGAGGAAAGAGGAAGATGCCTTGAGTGAAGCCCTGACTGAGACCATAGCTGATACTGATGCAGAAGATGAAGAGGAGATCCAAAATGACCTGTGGCACAAGGAAAGGTTCTTGGATGCTTATCCTTGGGTGAAACTGGAGATTGAGGAGAGCATCAGG…
ENSMUSG00000034457	Eda2r	0.04199783611006272	ectodysplasin A2 receptor [Source:MGI Symbol;Acc:MGI:2442860]	ATGGATTGTCAAGAGAATGAGTACCGGGACCAATGGGGGCGCTGTGTCACCTGCCAACAATGTGGCCCTGGACAGGAGCTCTCGAAGGATTGTGGTTATGGAGAAGGTGGAGATGCACACTGCATAGTCTGCCCTCCCCGAAAGTATAAAAGCACTTGGGGACATCACAGATGTCAGACATGCATCACTTGTGCTGTCATCAATCGGGTCCAGAAGGCCAACTGCACAAATACCTCTAATGCTATCTGTGGAGACTGTCTGCCCAGGTTCTACCGAAAGACACGCATTGGGGGCCTGCAGGACCAAGAATGCATCCCATGTACAAAGCAGACTCCTTCTTCCGAGGTTCAGTGTACCTTCCAGTTGAGCTTAGTGAAGGTAGATGCACACACTGTTCCC…
ENSMUSG00000062791	Gm382	-0.20575867463917516	predicted gene 382 [Source:MGI Symbol;Acc:MGI:2685228]	ATGAATTCCAAAAGAAATTCTGCTTCACAACAAAACAAGTCTGCTCAAAAAGAAAATCATTATAAAAATCCAAATGATGTGGTTCGTATGTCCAGAAATGACAAGGAAGTCAATCAACACCTAGAGCAAGGAAACTTTTCAGGAAATCCTGAAGAAACTGCAGAATCATCAAACAGTAATATTTTTAAGGCTGGGGAAATTTCAAACCTTACTCGGATTTTTCATGTATTACTAGAAGAAGAAAAGTATTTGACTCAATTTGGAGAAGGTACATTAGCAAAGTTCTATGCACATATCATGGAAAACACTGGTGTCAACTTAGAATCATCTTTTGTCAAAGACCAAGGTCTTTATGTGACAGTTTTTGGCAACCCAGAAGCTGTCACAAATGCTGAGAAT…
ENSMUSG00000001844	Zdhhc4	-0.22572607771650252	zinc finger, DHHC domain containing 4 [Source:MGI Symbol;Acc:MGI:1920131]	ATGGACTTCCTGGTTCTCTTCTTGTTCTACTTGGCCTTCTTATTGATTTGTGTTGTCCTGATCTGCATCTTCACAAAAAGCCAGCGTTTGAAGGCCGTGGTCCTTGGAGGAGCACAGGTGTGCTCCAGGGTAATCCCGCAGTGCCTCCAGAGGGCCGTGCAGACGCTTCTTCATCAGCTCTTCCACACACGCCACCCCACCTTCATCGTCTTGCACCTGCTCTTGCAAGGGCTAGTGTATGCAGAATACACCTGCGAGGTCTTCGGCTATTGCCGGGAGCTGGAGTTCTCTCTGCCTTACCTTCTCCTGCCCTATGTGCTGCTAAGCGTGAACCTGGTGTTCTTCACCCTGACTTGTGCCGCCAATCCTGGTACCATCACTAAAGCAAACGAATCATTT…
ENSMUSG00000090688	Vmn2r12	-0.09161409765397951	vomeronasal 2, receptor 12 [Source:MGI Symbol;Acc:MGI:3761377]	ATGAAGAAGCTATGTGTTTTCATTCTATTCTTTATGCTCCTGAAGTTTTCTCTCATCTCGCACCACTTAACTGAACCCATTTGCTTTTGGAGGATAAAGAATAATGAAGATAATGATGGAGATTTGAGAAGTGACTGTGGTTTTTTCCTTGCAGCAGTTGAGGGACCCATTGACCAAATTTATAATATTTCTAATTTTAGAATACCAGCAAGAAGATATGAGTTTTTCCTAGTACTGTTTTTTGCTACTGATGAAATCAACAAGAATCCTTATCTTTTACCCAACATGTCTTTGATATCCCCCATTGCTTCTGGTCAGTGTGAAAAAACATTGGAAAATCTGGATAAAATATATTCAGAAAAAAACCATACTGTACAATTTACTGATAATATCTGTGTA…
ENSMUSG00000020907	Rcvrn	0.6823364426579624	recoverin [Source:MGI Symbol;Acc:MGI:97883]	ATGGGGAACAGCAAGAGCGGTGCCCTGTCCAAGGAGATCCTAGAGGAGTTGCAACTGAACACCAAGTTCACAGAGGAGGAGCTGAGTGCCTGGTACCAGTCCTTCCTGAAGGAGTGCCCTAGCGGCCGCATCACGCGGCAGGAGTTCGAAAGTATCTATTCCAAGTTTTTCCCGGACTCCGACCCCAAGGCCTACGCGCAGCACGTGTTCCGCAGCTTCGATGCCAACAGCGATGGTACGCTGGACTTCAAGGAGTACGTGATTGCTCTGCACATGACCACGGCGGGCAAGCCCACGCAGAAGCTCGAGTGGGCCTTCTCGCTCTACGACGTAGACGGCAATGGGACCATCAGCAAAAATGAAGTGCTGGAGATCGTCATGGCTATCTTCAAAATGATC…
ENSMUSG00000047667	Olfr26	-0.022824172812861396	olfactory receptor 26 [Source:MGI Symbol;Acc:MGI:109309]	ATGGGCACTGGGAATCATTCTGCAGCAGTTGTGTTTGTCTTGGTGGAATTAACACAGCAGCCTGAACTCCTGCTGCCCCTCTTCATTCTGTTCCTGGGCATCTATGTGGTAACAGCAGTGGGAAACCTGGGCATGATCCTGCTGATCACAGTCAGTCCACTGCTGCATACTCCCATGTACTATTTCCTCAGCAGCTTATCCTGTGTTGATCTCTGCTATTCCACTGTCATTACACCCAAAATGCTGGTGAACTTTCTTGGGAAGAAAAATGTGATTGTCTACTCAGAGTGCATGGCCCAGCTCTTTTTCTTTGTGATCTTTGTGGTGGCTGAGGGCTACCTGCTGACTGCCATGGCGTATGATCGCTATGTGGCCATCTGTAGACCATTGCTGTATAAT…
ENSMUSG00000035181	Heatr5a	-0.3197450811347272	HEAT repeat containing 5A [Source:MGI Symbol;Acc:MGI:2444133]	ATGGAATTGGCTCACAGCTTGCTGCTCAATGAAGAAGCATCCAATCAGCTAGGTGCCGTTCAGAAGGCTGAGTTTATTTTTGAGTGGTTGAGATACTTGGAGAAGCTCTTGCTAGCAACAAACAGGGAGGACGTCAGGGAGAAGCAGAAGACTCTTGTTGGGCAGCTCCTGTCCTTGCTGAACAGCTCCCCGGGACCCCCCACGCGCAAGCTCCTTGCTCAGGACCTGGCCATCCTTTATAGTGTTGGAGACACAGTCTCTGTTTATGAGACGATCGATAAATGTAATGATCTTATTCGGAGCAAAGATGACTCTCCAAGTTACCTTCCCACCAAACTTGCTGCTGTGGTGTGCTTGGGTTCCTTGTACAAGAAATTGGGTAGAATCCTGGCTAATGGC…
ENSMUSG00000096606	Tpbgl	-0.3916723021163059	trophoblast glycoprotein-like [Source:MGI Symbol;Acc:MGI:3646425]	ATGGCCCCGCGCGCGGGACAGCGGGGGCTCTGGAGCCCGCTGCCAGGGCTGCTGCTCTTGGCGGCGGCGCTGAGCCGGCCCGCCGCGCCCTGTCCCTTCCAGTGTTACTGCTTCGGCAGCCCCCGGTTAATGTTGCGCTGCGCGTCGGGCGCGGAGCTCCGGCAGCCGCCCCGGGACGTGCCACCCGACGCGCGCAACCTCACCATCGTGGGCGCCAACCTGACCGTGCTGCGCGCCGCAGCCTTCGCGGGAGGGGGCGAGGGGGCGACGGACGGCGTGCGCCTACCGCTCCTTACCGCGCTGCGCCTCACACACAACAACATCGAGGTAGTAGAGGACGGTGCCTTCGACGGGTTGCCCAGCCTGGCGGCACTCGACCTAAGCCACAACCCGCTACGC…
ENSMUSG00000049815	4921511C20Rik	0.14331027824365875	RIKEN cDNA 4921511C20 gene [Source:MGI Symbol;Acc:MGI:2685229]	ATGAAAGACTTAGATCATGTGGTGGAGGACAGCATACTGATAAATCGCAAGTTTCACCATTATTTTGTCATGCGAAGGGACCAGCTTATAAGAGAAATGACTGAAGTCTATGCTGGTATGATAATTCACTTCACATATGAAGGAAAACAGAGCATTAGAGTTACAATGAAAGGAGAAAAGGCTTGTGTTGAAGCAGCGAAGAAACACATCCAACATATTTTTGAGCCCTTGGGTTCCCATGTCACAACACAGTATGTTATTCCTCAAAAGTTTTATACATTTTTCATGGGACCACTGTGTTCCAAAGTTCAGCAAATTGCTAGAGATTTCAAAGTTCAACTCGCATTTCCAGACAAAGAAAAGCCAACTACGTATATACATCCAGTGATTCAGGAAGCT…
ENSMUSG00000024349	Sting1	-0.11440539828526139	stimulator of interferon response cGAMP interactor 1 [Source:MGI Symbol;Acc:MGI:1919762]	ATGCCATACTCCAACCTGCATCCAGCCATCCCACGGCCCAGAGGTCACCGCTCCAAATATGTAGCCCTCATCTTTCTGGTGGCCAGCCTGATGATCCTTTGGGTGGCAAAGGATCCACCAAATCACACTCTGAAGTACCTAGCACTTCACCTAGCCTCGCACGAACTTGGACTACTGTTGAAAAACCTCTGCTGTCTGGCTGAAGAGCTGTGCCATGTCCAGTCCAGGTACCAGGGCAGCTACTGGAAGGCTGTGCGCGCCTGCCTGGGATGCCCCATCCACTGTATGGCTATGATTCTACTATCGTCTTATTTCTATTTCCTCCAAAACACTGCTGACATATACCTCAGTTGGATGTTTGGCCTTCTGGTCCTCTATAAGTCCCTAAGCATGCTCCTG…
ENSMUSG00000090894	Olfr110	0.043558186583338904	olfactory receptor 110 [Source:MGI Symbol;Acc:MGI:2177493]	ATGGAAGGAAAGAATCAAACAGCTCCATCTGAATTCATCATCTTGGGGTTCGACCACCTGAATGAATTGCAGTATTTACTCTTCACCATCTTCTTTCTGACCTACATATGCACTTTAGGAGGCAATGTTTTTATCATTGTGGTGACCATAGCTGATTCCCACCTACACACACCCATGTATTATTTCCTAGGAAATCTTGCCCTTATTGACATCTGCTACACTACTACTAATGTCCCCCAGATGATGGTGCATCTTCTGTCAGAGAAGAAAATCATTTCCTATGGAGGCTGTGTGACCCAGCTCTTTGCATTCATTTTCTTTGTTGGCTCAGAGTGTCTCCTCCTGGCAGCAATGGCATATGATCGATATATTGCTATCTGTAAGCCGTTAAGGTACTCA…
ENSMUSG00000023830	Igf2r	-0.20547542147340678	insulin-like growth factor 2 receptor [Source:MGI Symbol;Acc:MGI:96435]	ATGCGGGCCGTTCAGCTGGGACCGGTGCCCTCCGGGCCGCGCGTCGCGCTCCTGCCGCCGCTCCTGCTGCTGCTGCTCCTGGCGGCCGCGGGCTCCGCGCAGGCCCAGGCCGTCGACTTGGACGCCCTGTGCAGTTACACATGGGAAGCTGTTGACTCCAAAAACAATGCAGTTTATAAGATCAACGTCTGTGGAAATGTGGGTATTTCCAGCTGTGGGCCTACAAGTGCTATCTGTATGTGTGACCTAAAGACAGAGAACTGCCGCTCAGTGGGTGACTCACTTTTGAGAAGTTCAGCCAGATCACTCCTGGAATTCAACACCACTATGGGCTGCCAGCCTTCAGATTCACAGCACAGAATCCAGACTAGCATTACATTTCTGTGTGGGAAGACCCTG…
ENSMUSG00000078902	Gm14443	-0.564411722205929	predicted gene 14443 [Source:MGI Symbol;Acc:MGI:3652324]	ATGGATTTAGTCACCTATGATGACGTGCAGGTGAACTTCACTCAGGAAGAGTGGGCTTTGCTGGATCCTTCTCAGAAGAGTCTCTACAAAGATGTGATGCTAGAGACCTATAGGAATCTCAAAGCTATAGGGTACATTTGGGAAGGACATACAAGTGAAGACCATTTCCAAACTTCTAGAAGTCATGGAAGGCATGAAAGAAGTTGTACTGCAGTGAAACCCTCTGAGTTTATTCAATGTGGTAAAGCCTTTGCATATCAGAGTCTTAGACAAAGGCATGAAAGAACACATAAAGGAGAGAAAGACTATTACTGTAACCAATGTGGTAAAGCCTTTATAATAAGCAGTCATCTCCAAATACATAAACGAAGAAATACAGGAGAGAAACCCTATGAATGT…
ENSMUSG00000091636	Akain1	0.4717437902278231	A kinase (PRKA) anchor inhibitor 1 [Source:MGI Symbol;Acc:MGI:2444600]	ATGGTGTTCGCTCCAGGTGAGAAGTCTGGGAAGGAGCTAGAGGAGGTGAAGCTGCAGAACACCAGCAAGCAGATTGTCCAGAATGCCATCCTGCAAGCCATGCGGCAAGTCTCCCAGGAGAGCCTGCGGAGGGAAGGCAGACCCGGTGACAGCAGGGCCTGGGGCCAGCTGGGAGGGTGCGAGCTGACCAAGAAACATGAAAAGAAGTAA
ENSMUSG00000091635	Vmn2r13	-0.14895999046033034	vomeronasal 2, receptor 13 [Source:MGI Symbol;Acc:MGI:3761379]	ATGAAGGAGCTATGTGTTTTCATTCTATGCTTTTTGCTCCTGAAATTTTCTCTCATCTTGTGCCATTTAACTGAACCCATTTGCTTTTGGAGGATAAAGAGTAATGAAGATAATGATGGAGATTTGAGAAGTGACTGTGGTTTTTTCCTTGCAGCAGTTGAGGGACCTATTGACCAAATATATAATATTTCTGATTTTAGAATACCAGCAAGAAGATATGAGTTTTTCCTAGTACTGTTTTTTGCTACTGATGAAATCAACAAGAATCCTTATCTTTTACCCAACATGTCTTTGATATCCCCCATTACTTCTGGTCAGTGCGAAAAAACATTGGGAGATCTGGACAAAATATATTCAGAAAAGAACATTACTGTGGAATTTACTGATAATATCTGTGTA…
ENSMUSG00000049928	Glp2r	-0.033947752088685584	glucagon-like peptide 2 receptor [Source:MGI Symbol;Acc:MGI:2136733]	ATGCGTCGGCTCTGGGGCCCTGGGACGCCCTTCCTCGCCCTGCTTCTGCTGGTTTCCATCAAGCAAGTTACTACAGGATCTCTCCTTGAGGAGACAGTTCAGAAGTGGGCTCAGTATAAGGAGACGTGTCTGAAAGACTTGCTCGAGAAACCTTCTGGTGTATTTTGTAATGGAACATTTGATAAGTACGTGTGCTGGCCTCATTCTTTTCCTGGAAATGTCTCTGTCCCCTGTCCTTCATACTTACCTTGGTGGAATAAAGAGAGCCCAGGAAGGGCCTACAGACACTGCTTGGCTCAGGGGACTTGGCAGAAGCAAGAGAACTCCACAGATACTTGGCAGGATGAGTCAGAATGCTCAGAGAACCACAGCTTCAAACAAAACGTGGATCACTATCAC…
ENSMUSG00000043569	Cldn34c4	-0.10600107974140335	claudin 34C4 [Source:MGI Symbol;Acc:MGI:1921184]	ATGGTCTTCTTCAACAAGTCTGCCAATTACCAAATAAGAGGTTTCGCCTTGGCCACCATTGCATGGATAATGTGCAGCACATCTATGGGCCTTCCAGAATGGCGAATTTGGTATTTCGAGGAACCCATGGTTTCCTCCCCAAACATGGCTTTTATAGGTATGTGGAGGGCCAGTATCTGCAACCACGTTGACAACTCCAGCCACAAGAGTGTTTGCCAGCACTACTCCTACCATGATGCCCTCGTTCCTTTGGACATTCGGTTAGCGCAACATCTGCTCCTGGTTGCAAACATTATTGGTCTGATTGGGACAGTTTGTGCTGTCTTTGCTCTACAGCAGTTATACACAGAGAAACTGGAGACAAATAATGACGACAATCCATTTCTTCTTTCAGCTGTT…
ENSMUSG00000034731	Dgkh	-0.20324734665196606	diacylglycerol kinase, eta [Source:MGI Symbol;Acc:MGI:2444188]	ATGGAGCCTCAGCACGTGCGCCCCGTGCTTGGAGCCCAGAGCCCGGCCTGGGAGGAACCGGAATCAGAGAGGATGGCCGGGGCCGGCAGCCAGCACCACCCTCAGGGCGTCGCGGGAGGAGCGGTCGCTGGGGCCAGCGCGGTTTCCCCCACTGCTGCAGGACCGGGAGAGGATTCGTCCGACAGTGAAGCGGAGCAGGAGGGGCCCCAGAAGCTGATCCGTAAAGTGTCCACCTCTGGACAGATGCGGACCAAGACTAGTATTAAGGAAGGACAACTGCTGAAGCAAACCAGCTCTTTCCAAAGGTGGAAGAAGAGATACTTCAAGCTTCGCGGCCGCACACTTTATTATGCGAAAGACTCCAAGTCCTTGATATTTGATGAAGTTGACCTCTCAGAT…
ENSMUSG00000031701	Dnaja2	0.37491406143505324	DnaJ heat shock protein family (Hsp40) member A2 [Source:MGI Symbol;Acc:MGI:1931882]	ATGGCGAACGTGGCCGACACGAAGCTGTACGACATCCTGGGCGTCCCTCCCGGCGCTAGCGAGAACGAGCTGAAGAAGGCATACCGAAAGTTAGCCAAAGAATACCACCCTGATAAGAATCCAAATGCTGGAGACAAATTTAAAGAAATAAGTTTTGCATATGAAGTATTGTCAAATCCAGAGAAGCGAGAGCTGTATGACAGATATGGAGAACAAGGCCTACGGGAAGGCAGCGGCGGAGGCGGTGGCATGGATGATATCTTCTCACATATTTTTGGTGGAGGATTGTTTGGCTTTATGGGCAATCAGAGTAGAAGTCGAAATGGCAGAAGAAGAGGCGAGGACATGATGCATCCACTAAAAGTATCTTTAGAAGACCTGTACAATGGCAAGACAACC…
ENSMUSG00000027500	Stmn2	0.49452304449774764	stathmin-like 2 [Source:MGI Symbol;Acc:MGI:98241]	ATGGCTAAAACAGCAATGGCCTACAAGGAAAAAATGAAGGAGCTGTCTATGCTGTCACTGATCTGCTCCTGCTTCTACCCGGAGCCGCGCAACATCAACATCTACACCTACGACGACATGGAGGTGAAGCAGATCAACAAGCGGGCCTCTGGCCAGGCTTTTGAGCTGATCTTGAAGCCACCATCTCCCATCTCAGAAGCTCCACGAACTCTAGCTTCTCCAAAGAAGAAAGACCTGTCTCTGGAGGAGATTCAGAAAAAGCTGGAGGCTGCAGAGGAGCGAAGAAAGTCTCAAGAGGCTCAGGTGCTGAAGCAGTTGGCAGAGAAGAGGGAGCACGAGCGAGAGGTGCTCCAGAAGGCGCTGGAGGAGAACAACAACTTCAGCAAGATGGCGGAGGAG…
ENSMUSG00000064333	Olfr926	0.006067367052867392	olfactory receptor 926 [Source:MGI Symbol;Acc:MGI:3030760]	ATGAATCATTCTTCAGTGACTGATTTTATCCTCGAAGGACTAACAAAACGCCCAGAGCTTCAGCTCCCACTGTTCCTCTTGTTTCTGGGCATACATGTGATTACAGTGGTGGGAAACTTGGGCATGATCCTCTTAATCAACATTAGTTCTCAACTTCACTCTCCAATGTATTATTTTCTCAGTCACTTATCCTTCATTGACCTCTGCTATTCCTCTGTCATTACACCAAAGATGTTGGTGAACTTTGTATGTGCAAAGAACACAATCTCCTTTAAGGAGTGCATGACTCAGCTTTATTTCTTCCTCCTTTTAGCTATTTCAGAAGGCTACCTGCTGACAGCCATGGCCTATGACCGCTATGTTGCCATCTGTAGCCCACTGCTTTATAACACTGTAATG…
ENSMUSG00000061838	Suclg2	0.7177157939851136	succinate-Coenzyme A ligase, GDP-forming, beta subunit [Source:MGI Symbol;Acc:MGI:1306824]	ATGGCGTCCCCGGTGGCCATCGCGGCGCAGGCTGGGAAGCTTCTGCGAGAGCGAGCGCTGCGGCCGCTCCTGGCGGTCAGGTCCCAGGCCGGTCACTTAACCCCCCGAAGATGGCTGAACCTGCAGGAGTACCAGAGCAAGAAGCTCATGTCAGAGCACGGAGTGAGAGTGCAGAGGTTCTTTGTTGCCAACACTGCTAAAGAGGCTCTGGAGGCAGCCAAGAGATTGAATGCAAAAGAAATTGTTTTAAAAGCCCAGATCTTAGCTGGAGGAAGAGGAAAAGGTGTCTTCAATAGCGGTTTGAAAGGAGGTGTTCATTTAACAAAAGACCCTAAAGTAGTGGGAGAGTTGGCTCAACAGATGATTGGTTATAATCTAGCAACGAAACAAACTCCAAAA…
ENSMUSG00000091059	Vmn2r14	-0.05635227694464859	vomeronasal 2, receptor 14 [Source:MGI Symbol;Acc:MGI:3649151]	ATGAAGAACCTGCGTGGTTTTGGTCTTTCCTTTATGCTCCTGAAGTTTTCTCTCATCTGGTGCCATTTGACTGAACCCATTTGCTTTTGGAGGATAAAGAATAATGAAGATAATGATGGAGATTTGAGAAGTGACTGTGGTTTTTTCCTTGCAGCAGTTGAGGGACCTATTGACCACACTTATAATATCTCTGATTTTAGAATACCAGCAAGAAGACATGAGTTTTTCCTAGTACTGTTTTTTGCTACTGATGAAATCAACAAGAATCCTTATCTTTTACCCAACATGTCTTTGATATTCCCTGAAGATCCTGGTCAGTGTGAAAAACTATTGGGAGAACTGGATAAAATACATTCAGAAGCAAAATTTACTGTGGATTTTACTGATTATATATGTGCA…
ENSMUSG00000047048	Olfr432	0.14066761303130174	olfactory receptor 432 [Source:MGI Symbol;Acc:MGI:3030266]	ATGGATCATGTCAACTATACCTGGACACGGACCTTCATCCTTGCTGGTTTCACTACCTCTGGCACCCTGCAACATCTTGCAGTTTTTGGAACCCTGTGCATCTATCTCCTCACACTGGCAGGGAACTTGTTCATCATTGTCTTGATCCAGGCAGATTCAGGGCTGTCCACTCCCATGTACTTCTTTATCAGTGTCCTCTCCTTCCTGGAACTCTGGTATGTCAGCACCACAGTGCCCACCTTGCTGCATACCTTGCTCCATGGGCCTTCACCCATCCCCTCGTCTGCATGCTTTGTCCAGCTGTATGTCTTCCACTCCTTGGGCATGACCGAGTGCTACCTGCTAGGTGTCATGGCTCTGGACCGCTACCTTGCTATCTGTCGTCCACTGCACTACCAT…
ENSMUSG00000078903	Gm14391	-0.5912473037632927	predicted gene 14391 [Source:MGI Symbol;Acc:MGI:3709324]	ATGGATTTAGTCACCTATGATGACGTGCAGGTGAACTTCACTCAGGATGAGTGGGCTTTGCTGGATCCTTCTCAGAAGAGTCTCTACAAAGATGTGATGCTAGAGACCTATAGGAATCTCACAGCTATAGGTTACATTTGGGAAGAACATACGATTGAAGACCATTTTCAAACTTCTAGAAGTCATGGAAGGCATGAAAGAAGTTGTTCTGCAGAGCAACCCTCTGAGTTTATTCAATGTGGTAAAGCCTTTGCATATGAGAGTGGTAGACAAAGGCATCAAATTAAACATAATGGAGAGAAACACCATGACTGTAACCAATGTGGTAAGGACTTTAGAACATGGAATGTCCTGCAAATACATAAGCGAACACATACAGGAGAGAAACCCTATGACTGT…
ENSMUSG00000075602	Ly6a	0.2303824434561104	lymphocyte antigen 6 complex, locus A [Source:MGI Symbol;Acc:MGI:107527]	ATGGACACTTCTCACACTACAAAGTCCTGTTTGCTGATTCTTCTTGTGGCCCTACTGTGTGCAGAAAGAGCTCAGGGACTGGAGTGTTACCAGTGCTATGGAGTCCCATTTGAGACTTCTTGCCCATCAATTACCTGCCCCTACCCTGATGGAGTCTGTGTTACTCAGGAGGCAGCAGTTATTGTGGATTCTCAAACAAGGAAAGTAAAGAACAATCTTTGCTTACCCATCTGCCCTCCTAATATTGAAAGTATGGAGATCCTGGGTACTAAGGTCAACGTGAAGACTTCCTGTTGCCAGGAAGACCTCTGCAATGTAGCAGTTCCCAATGGAGGCAGCACCTGGACCATGGCAGGGGTGCTTCTGTTCAGCCTGAGCTCAGTCCTCCTGCAGACCTTG…
ENSMUSG00000025321	Itgb8	-0.48795161242931495	integrin beta 8 [Source:MGI Symbol;Acc:MGI:1338035]	ATGTGCGGCTCGGCCCTGGCTTTTCTGACTGCTGCACTGCTCTCTCTGCACAACTGCCAGCGAGGTCCAGCCTTGGTTCTTGGGGCAGCCTGGGTATTTTCACTTGTTCTCGGACTGGGCCAAAGTGAACACAATAGATGTGGCTCTGCAAATGTGGTCTCCTGTGCCAGGTGCCTCCAGCTGGGTCCGGAATGCGGATGGTGTGTTCAAGAGGATTTTGTTTCAGGTGGATCAGGAAGTGAACGTTGTGATACTGTTTCCAGTTTGATAAGCAAAGGCTGTCCAGTTGATTCAATAGAATACCTGTCTGTGCATGTTGTAACGTCAAGTGAGAATGAAATCAATACCCAGGTGACACCGGGAGAAGTCTCAGTCCAACTGCATCCAGGAGCTGAAGCT…
ENSMUSG00000036932	Aifm1	0.31472949939558514	apoptosis-inducing factor, mitochondrion-associated 1 [Source:MGI Symbol;Acc:MGI:1349419]	ATGTTCCGGTGTGGAGGCCTGGCGGGTGCTTTCAAGCAGAAACTGGTGCCCTTGGTGCGGACGGTGTACGTCCAGAGGCCGAAACAGAGGAACCGGCTTCCAGGCAACTTGTTCCAGCAATGGCGTGTTCCTCTAGAACTCCAGATGGCAAGACAAATGGCTAGCTCTGGTTCATCAGGGGGCAAAATGGATAATTCTGTGTTAGTCCTTATTGTGGGCTTATCAACAATAGGAGCTGGTGCATATGCCTACAAAACTATAAAAGAAGACCAAAAAAGATACAATGAAAGAGTGATGGGATTAGGACTGTCCCCAGAAGAGAAACAGAGAAGAGCCATTGCCTCCGCTACAGAGGGAGGCTCAGTTCCTCAGATCAGGGCACCAAGTCACGTCCCTTTC…
ENSMUSG00000068696	Gpr88	-0.6106085141364356	G-protein coupled receptor 88 [Source:MGI Symbol;Acc:MGI:1927653]	ATGACCAACTCCTCCTCCACTTCGACCTCCACCACTACCGGGGGATCGCTGCTGCTGCTCTGCGAGGAAGAAGAATCGTGGGCGGGCCGGCGGATCCCGGTGTCTCTCCTGTACTCGGGCCTGGCCATCGGGGGCACGCTGGCCAACGGTATGGTCATCTATCTCGTGTCGTCCTTCCGAAAGCTGCAGACCACCAGCAACGCCTTCATCGTGAATGGCTGCGCCGCGGATCTCAGCGTCTGCGCCCTCTGGATGCCACAGGAGGCGGTGCTGGGGCTCCTGCCCTCGGGCTCCGCGGAGCCCCCGGGGGACTGGGACGGTGGCGGAGGCAGCTACCGCCTGCTCCGGGGCGGGTTGTTGGGCCTCGGGCTCACTGTGTCCCTTCTGTCCCATTGCCTC…
ENSMUSG00000034430	Zxdc	-0.8718783030826981	ZXD family zinc finger C [Source:MGI Symbol;Acc:MGI:1933108]	ATGGACCTCCCGGCGGTGCTGGCCGCCCCGGCCACGCGCGGAGACCAACATGGCGGTGGCCCGAGCCGACTTCGCCGCGGCGCGGGGCCGTCCCTCGGTGCCGGTCCCGGGCGCCGTCGCCTGCTGCTGCTGAGGGGCCCGGAAGATGGCGGGCCCGGGCCGCGTCCAGAGGAGGCCCCGGGGCCCAGCCCGCCGCCCCCGGAGGACGGCGGCGACTCCTTCGTGGTACTGCTGGAAGTGCCGCGCGCGGCCGACACCCATGGTCAGGAGGAGGCCGAGCCCGATTCGGGCGCGAGCCCCACGGAACAGGTCCCGGCCGCCGCCCCCGGCGCAGCTCTGGCAGGCACGGTCACCATCCACAACCAGGACCTCCTGGTGCGCTTCGACCGCGGCGTCTTC…
ENSMUSG00000032078	Zpr1	0.4050308706431788	ZPR1 zinc finger [Source:MGI Symbol;Acc:MGI:1330262]	ATGTCTGCCAGCGGGGCTGTGCAGCCGGGACACCCGGGGGCCGCCGTCGGGCCCTCGCCCGCTGCGGCTGCGTCACCAGCCACCGGGCCTTTGTTCCGGCCCCTCAGCGCCGAGGATGAGGAGCAACAGCCCACCGAGATCGAGTCACTGTGCATGAACTGTTACCGGAACGGCACGACGCGACTTCTGCTCACCAAGATCCCCTTCTTTAGAGAAATCATCGTGAGCTCCTTTTCCTGCGAACACTGTGGCTGGAACAACACGGAGATCCAGTCTGCAGGCAGGATCCAGGACCAGGGAGTGCGCTACACCTTGACCGTGAGAAGCCAAGAGGACATGAACAGAGAAGTGGTAAAGACAGACTCTGCCACCACAAGGATCCCCGAGCTGGATTTTGAG…
ENSMUSG00000021900	Btd	-0.1426646511688637	biotinidase [Source:MGI Symbol;Acc:MGI:1347001]	ATGCGAAGCAGATTTATGGTCTGCATTATGTCTGGAGCCCGCACTGCGCCTGCTCTCTTCTTCCTCGGCTGTTCTGCGCTTGCGTTGGGCGTCAGCTCGGCCTCCCAGGAGCACCGCGAGGCTGAGTACTACGTGGCTGCTGTGTACGAGCATCCATCGGTCCTGAGCCCAAACCCCCTGGAGCTCGTTAGCCGCCAGGAGGCCCTGGAGCTCATGAAGCAGAACCTCGACGTCTATGAACAGCAAGTGATGGCTGCAGCCCAGAAGGGTGTGCAGATTATAGTGTTCCCAGAAGATGGTATCCACGGATTCAACTTTACAAGAACATCCATTTACCCGTTCTTGGATTTTATGCCGTCTCCCAAGCTGGTCAGGTGGAACCCGTGTCTGGAGCCCTTT…
ENSMUSG00000091375	Vmn2r15	-0.07469985465390003	vomeronasal 2, receptor 15 [Source:MGI Symbol;Acc:MGI:3649165]	ATGAAGAAGCTACGTGTTTTTACTTTTTCCCTTTTGCTCCTGAAGTGTTTTCTCATCTCGTGCCATTTGACTGAACCCATTTGCTTTTGGAGGCTAAAGAATAATGAAGATAATGATGGAGATTTGAGAAGTGACTGTGGTGTTTTCCTTGCAGCAGTTGAGGGACCTATTGACCAAATATATAATATTTCTGATTTTAGAATACCGGCAAGAAGATATGAGTTTTTTCTAGTAATGTTTTTTGCTACTGATGAAATCAACAAAAATCCTTACCTTTTACCCAACATGTCTTTGATATCCCCCGTTGATCATGGTCAATGTGAAGAAACATTGGGACTTCTCGATGAAATATATTTAGAAAAAAACAATAGTGTGGAATTTACAGATTATATCTGTGTA…
ENSMUSG00000032624	Eml4	-0.37365656557639537	echinoderm microtubule associated protein like 4 [Source:MGI Symbol;Acc:MGI:1926048]	ATGGACGGTTTCGCCGGCAGCCTCGATGATAGTATTTCTGCTGCAAGTACCTCTGACGTTCAAGACCGCCTCTCAGCTCTTGAGTCACGAGTTCAACAACAAGAAGATGAAATCACTGTGCTAAAGGCAGCATTGGCTGATGTTTTGAGGCGTCTTGCAATCTCTGAAGATCATGTAGCCTCAGTGAAAAAGTCCATGCCAAGTAAAGGCCAACCAAGCCTTCGAGAAGCTATTTCTATGTCCTGTATAACCAATGGAAGTGGTATAAGCAGAAAACAGAATCATACCAGCTCTGTATCAATAGCAAGAAAAGAAACTCTTTCTTCAGCTGCTAAAAGTGGTACAGAAAAAAAGAAAGAAAAGCCACAAGGACAGAGAGAAAAAAAAGAGGATTCTCAT…
ENSMUSG00000070388	Fbxo39	-0.16436188456095832	F-box protein 39 [Source:MGI Symbol;Acc:MGI:3505735]	ATGGATGAAGACTGTGAAGTGACCCAGCTCCAAGAGCAGAGCTGCTGGGCCACTCTGCCAGATGTGTGCCTGCGACGTGTTTTCTGGTGGCTGGGAGACAGGGACAGGTCCAGAGCTGCCCTGGTCTGCAGAAAGTGGAACCAGATTATGTACTCAGCTGACCTCTGGCGATACAGGACCATCACGTTCAGCGGAAGGCCGTCCAGGGTACACGCATCTGAATTCGAGTCGGCACTGTGGTACATTAAGAAATTTGGCCGATACCTGGAACACTTGGAAATCAAGTTCCTGAACCCTTACAATGCCGTCTTGACCAAAAAGTTCCAGGTCACCATGCGAGGCCTCCTGTCATGCCTGGGCAAGAGTAACAACCGCCTGCGGTCACTCTCTATCCAACAC…
ENSMUSG00000023122	Sult1c2	0.24922345325247444	sulfotransferase family, cytosolic, 1C, member 2 [Source:MGI Symbol;Acc:MGI:1916333]	ATGGCCTTGACCCCAGAACTGAGCAGACAAACCAAACTGAAAGAGGTAGCAGGGATCCCACTGCAGGCTCCAACTGTGGACAACTGGAGGCAGATTCAGACCTTCGAGGCCAAGCCAGACGACCTCCTCATTTGTACTTACCCTAAATCAGGGACAACATGGATTCAAGAAATTGTGGACATGATTGAGCAGAATGGTGATGTAGAGAAGTGCCGGCGAACCATCATTCAACACCGACACCCTTTTATTGAGTGGGCACGGCCACCCCAACCATCAGGTGTGGACAAAGCCAATGAGATGCCAGCTCCAAGGATATTAAGGACCCATCTTCCCACTCAGCTGCTGCCACCATCTTTCTGGACAAACAACTGTAAGTTCCTTTATGTAGCTCGAAATGCT…
ENSMUSG00000038975	Rabggtb	0.3200246740044783	Rab geranylgeranyl transferase, b subunit [Source:MGI Symbol;Acc:MGI:99537]	ATGGGATCTCTGCTTTTTTCTTGGAAGGGCACACAGCAGAAAGACGTTACTATCAAGTCAGATGCGCCTGACACCCTGTTGCTGGAGAAGCATGCCGATTATATTGCTTCCTATGGCTCAAAGAAAGATGATTATGAATACTGCATGTCTGAATACCTGAGAATGAGCGGCGTCTATTGGGGCCTGACTGTGATGGACCTCATGGGACAGCTTCATCGCATGAACCGAGAAGAAATCCTGGTGTTTATCAAGTCGTGCCAGCATGAGTGTGGGGGAATAAGTGCTAGCATTGGGCACGACCCCCACCTTCTGTACACGCTCAGTGCTGTCCAGATTCTTACTCTGTATGACAGTGTTCATGTTATCAACGTAGATAAGGTCGTGGCCTATGTTCAGAGC…
ENSMUSG00000028134	Ptbp2	0.27192738201687283	polypyrimidine tract binding protein 2 [Source:MGI Symbol;Acc:MGI:1860489]	ATGGACGGAATTGTCACTGAGGTTGCTGTTGGTGTGAAGAGAGGATCTGACGAGCTACTCTCAGGCAGTGTTCTCAGCAGCCCCAACTCTAATATGAGTGGCATGGTAGTTACAGCCAACGGTAACGATAGTAAGAAATTTAAAGGAGAAGATAAAATGGATGGGGCTCCCTCTCGTGTACTTCACATTCGAAAGTTACCTGGTGAAGTGACTGAAACAGAAGTTATTGCTTTAGGTTTACCTTTTGGTAAGGTGACTAACATCCTTATGCTGAAAGGAAAAAACCAGGCATTTTTGGAACTGGCAACAGAGGAAGCAGCTATTACTATGGTTAATTACTATTCTGCTGTGACACCTCATCTTCGTAACCAACCAATTTACATCCAGTACTCCAATCAC…
ENSMUSG00000005102	Eif2ak4	-0.25026871131014794	eukaryotic translation initiation factor 2 alpha kinase 4 [Source:MGI Symbol;Acc:MGI:1353427]	ATGGCTGGGGGCCGCGGGGCCTCTGGACGCGGCCGGGCTGAGCCACAGGAGAGCTATTCGCAGCGACAGGACCACGAGCTGCAGGCCCTGGAGGCCATTTACGGCTCGGACTTCCAGGATCTGCGGCCGGATGCGCGCGGACGGGTGAGAGAGCCTCCTGAAATCAACTTAGTTCTTTACCCTCAGGGCCTAGCTGGTGAAGAAGTATACGTGCAAGTGGAACTGAGGGTTAAATGCCCACCTACATACCCAGATGTAGTTCCCGAAATAGACTTAAAAAATGCTAAAGGCCTGTCGAATGAAAGTGTTAATTTGTTAAAATCACACCTGGAAGAACTGGCCAAAAAGCAGTGTGGAGAGGTGATGATATTTGAACTGGCACACCATGTGCAGTCGTTT…
ENSMUSG00000028680	Plk3	-0.1550376948393107	polo like kinase 3 [Source:MGI Symbol;Acc:MGI:109604]	ATGGAGCCCGCCGCCGGCTTCTTGTCTCCGCGCCCCTTCCCGCGCGCGGCTGCCCCGTCCGCGCCCCCCGCCGGCCCGGGGCCGCCTGCCAATGCCTCCCCGCGATCGGAACCTGAGGTGCTGGCCGGGCCACGGGCGCCGGATCCTCCTGGTCGCCTCATCACCGACCCTCTCAGCGGCCGTACCTACACCAAGGGTCGCTTGTTGGGCAAGGGGGGCTTCGCACGCTGCTATGAAGCCACTGACACCGAGTCTGGTATAGCCTACGCGGTCAAAGTCATCCCACAGAGTCGCGTCGCCAAGCCGCATCAGCGCGAGAAGATCCTAAATGAGATAGAGTTGCACCGAGACCTACAGCACCGCCATATCGTTCGCTTTTCACATCATTTCGAGGATGCT…
ENSMUSG00000041733	Coq5	0.16983149338813955	coenzyme Q5 methyltransferase [Source:MGI Symbol;Acc:MGI:1098643]	ATGGCGGCGCCCAGGTGCTGCGTTCTATGGCGCGTCTGCGGCCGCGGGTGGTGGCGAGCCACGGGACACTGCAGGCTCCCCGGGTGTCATAGATCCTGGCCATGGGCCACGCTGGGAACGCGGTCCTTGTCCCAGGAGAAGCGAGCCGCGGAAACGCACTTCGGGTTTGAGACCGTGTCGGAAGGGGAGAAAGGAAGCAAAGTCTACCAGGTGTTTGAGAACGTGGCCAAGAAGTACGATCTGATGAATGACATGATGAGTCTCGGCATCCATCGAGCTTGGAAGGATTTGCTTATCAGGAAGATGCACCCGCTGCCCGGGACCCAGCTGCTCGACATGGCTGGAGGCACAGGTGACATTGCGTTCCGGTTCCTTAGTTACGTTCAGGCACAACATCAG…
ENSMUSG00000055371	Stam2	0.003219622795667034	signal transducing adaptor molecule (SH3 domain and ITAM motif) 2 [Source:MGI Symbol;Acc:MGI:1929100]	ATGCCTCTGTTCACTGCCAACCCGTTCGAGCAAGATGTGGAAAAAGCCACAAATGAGTACAACACCACAGAAGACTGGAGTCTGATCATGGACATCTGTGACAGGGTTGGAAGCACTCCCAGTGGAGCAAAAGATTGCCTAAAAGCCATAATGAAAAGGGTAAACCATAAGGTCCCTCACGTTGCTCTGCAGGCATTGACCCTTCTTGGAGCTTGTGTGGCAAACTGTGGAAAGATATTTCATTTAGAAGTATGTTCCCGTGATTTTGCAACGGAAGTACGTTCTGTGATAAAAAATAAGGCTCATCCTAAAGTATGTGAAAAACTAAAATCTCTAATGGTGGAATGGTCAGAAGAATTCCAGAAGGACCCCCAATTTAGTCTGATATCTGCAACTATT…
ENSMUSG00000021884	Hacl1	0.03523558510635985	2-hydroxyacyl-CoA lyase 1 [Source:MGI Symbol;Acc:MGI:1929657]	ATGCCAGAAAGTAACTCCGCAGAGGGTAGCGACAGAAGCGAGGAGCAGGTGTCTGGTGCTAAAGTCATCGCCCAGGCTCTAAAAACTCAAGATGTGGAGTACATGTTCGGTGTCGTAGGCATCCCCGTGACCGAAATCGCCCTTGCTGCCCAGGAACTGGGCATCAAGTACATTGGGATGCGGAATGAGCAAGCGGCTTGTTATGCTGCCTCTGCAGTTGGATACCTGACAGGCAGGCCAGGAGTGTGCCTTGTTGTTTCTGGTCCCGGTCTCATCCACGCCTTGGGCGGCATGGCAAATGCAAACATGAACTGTTGGCCCTTGATTGTGATTGGTGGTTCTTCTGAAAGAAATCAAGAAGCTATGGGAGCCTTCCAGGAGTTTCCACAGGTTGAAGCT…
ENSMUSG00000021189	Atxn3	-0.2833386597962543	ataxin 3 [Source:MGI Symbol;Acc:MGI:1099442]	ATGGAGTCCATCTTCCACGAGAAACAAGAAGGCTCACTTTGTGCTCAGCATTGCCTGAATAACCTATTGCAAGGAGAGTATTTTAGCCCTGTGGAGCTATCCTCAATTGCACACCAGCTGGATGAAGAGGAGAGGCTGAGAATGGCAGAAGGGGGAGTCACTAGTGAAGACTACCGCACATTTTTACAGCAGCCTTCTGGAAATATGGATGACAGCGGCTTTTTCTCTATTCAAGTTATAAGCAATGCTTTGAAAGTTTGGGGTTTAGAACTAATCCTGTTCAACAGTCCAGAGTACCAGAGGCTCAGAATTGATCCTATAAACGAAAGATCCTTTATATGCAATTATAAAGAACACTGGTTTACAGTTAGAAAATTAGGCAAGCAGTGGTTTAACTTG…
ENSMUSG00000021182	Ccdc88c	-0.4928923031582765	coiled-coil domain containing 88C [Source:MGI Symbol;Acc:MGI:1915589]	ATGGACGTGACGGTGTCGCAGCTCGTTGAGCTGTTTCTGCAGAGCCCTCTGGTGACCTGGGTGAAAACTTTTGGATCGTTTGGAAGCGGCCACCAGGACAACTTGACTCTGTACATGGATTTAGTGGACGGCATCTTTTTGAATCAAATCATGCTGCAAATAGACCCCAGGCCCAGCAATCAGCGCATCAACAAGCATGTCAACAATGATGTCAACCTGCGCATCCAAAACCTGAGTATCCTGGTGAGAAACATCAAGACCTACTACCAGGAAGTTCTCCAGCAGCTGATCGTAATGAATTTGCCCAATGTCTTGATGATTGGCAAAGACCCGCTGTCTGGGAAGAGCATGGAGGAGATTAAGAAGGTCCTGCTGCTGGTGCTGGGCTGTGCCGTTCAG…
ENSMUSG00000026628	Atf3	0.17659297839936763	activating transcription factor 3 [Source:MGI Symbol;Acc:MGI:109384]	ATGATGCTTCAACATCCAGGCCAGGTCTCTGCCTCAGAAGTCAGTGCGACCGCCATTGTCCCCTGCCTCTCACCTCCTGGGTCACTGGTATTTGAGGATTTTGCTAACCTGACACCCTTTGTCAAGGAAGAGCTGAGATTCGCCATCCAGAATAAACACCTCTGCCATCGGATGTCCTCTGCGCTGGAGTCAGTTACCGTCAACAACAGACCCCTGGAGATGTCAGTCACCAAGTCTGAGGCGGCCCCTGAAGAAGATGAGAGGAAAAGGAGGCGGCGAGAAAGAAATAAAATTGCTGCTGCCAAGTGTCGAAACAAGAAAAAGGAGAAGACAGAGTGCCTGCAGAAAGAGTCAGAGAAACTGGAGAGTGTGAATGCTGAGCTGAAGGCCCAGATTGAG…
ENSMUSG00000002100	Mybpc3	0.2221352097727949	myosin binding protein C, cardiac [Source:MGI Symbol;Acc:MGI:102844]	ATGCCTGGTGTGACTGTTCTCAAGATGCCGGAGCCAGGGAAGAAACCAGTGTCAGCCTTCAACAAGAAGCCAAGGTCAGCGGAGGTGACCGCTGGCAGTGCTGCCGTGTTCGAGGCTGAGACGGAGCGGTCAGGCGTGAAGGTGCGGTGGCAGCGGGATGGCAGCGACATCACCGCCAATGACAAGTATGGTTTGGCAGCAGAGGGCAAGCGACACACACTGACAGTGCGGGATGCGAGCCCTGATGACCAGGGTTCCTACGCGGTCATTGCAGGCTCCTCAAAGGTCAAGTTTGACCTCAAGGTCACAGAGCCAGCCCCTCCAGAGAAGGCAGAATCTGAAGTTGCTCCAGGAGCCCCCAAAGAAGTCCCTGCTCCAGCCACTGAGTTGGAAGAAAGT…
ENSMUSG00000030166	Rad52	-0.32640061390516506	RAD52 homolog, DNA repair protein [Source:MGI Symbol;Acc:MGI:101949]	ATGGCTGGGCCTGAAGAAGCAGTCCACAGAGGGTGTGACAACCATCCTCCCTTTGTTGGTGGGAAGTCTGTGCTCCTCTTTGGACAGAGCCAGTATACAGCGGATGAATACCAGGCCATCCAGAAAGCTCTGAGACAGAGACTGGGTCCAGAGTACATTAGCAGCCGCATGGCTGGAGGAGGTCAGAAGGTGTGTTATATTGAAGGTCATCGGGTAATTAATCTGGCCAATGAGATGTTTGGTTACAATGGCTGGGCACACTCCATCACCCAGCAAAATGTGGATTTTGTTGACCTCAACAATGGCAAGTTCTACGTGGGAGTCTGTGCATTTGTAAAGGTGCAGTTAAAGGATGGTTCCTATCATGAGGACGTGGGCTATGGAGTTAGTGAGGGCCTC…
ENSMUSG00000022722	Arl6	0.11106384155644858	ADP-ribosylation factor-like 6 [Source:MGI Symbol;Acc:MGI:1927136]	ATGGGCTTGCTGGACAGACTTTCAGGTTTGCTTGGCCTGAAGAAGAAGGAGGTTCATGTTCTGTGCCTGGGGCTGGATAACAGTGGGAAAACCACAATCATTAACAAGCTGAAGCCTTCCAACGCTCAATCTCAAGATATAGTTCCAACCATAGGATTTAGCATAGAGAAATTCAAGTCCTCCAGTTTGTCTTTTACAGTGTTTGACATGTCAGGTCAAGGAAGGTACAGGAATCTCTGGGAACACTATTATAAAGATGGACAAGCCATTATTTTTGTCATTGATAGTAGTGATAAGTTAAGAATGGTTGTGGCCAAAGAAGAGCTTGATACCCTTCTGAATCACCCAGATATTAAGCACCGTCGAATTCCAATCTTGTTCTTTGCAAACAAAATGGAC…
ENSMUSG00000019261	Map1s	-0.3983720693677636	microtubule-associated protein 1S [Source:MGI Symbol;Acc:MGI:2443304]	ATGGCGGCAGTGATGGCGGCGCCGGAGGCTGTGGAGGCGCCCAGCTCCCTACTGTTGCTGGTGGTGGGTGGCGAGTGTGGCTGCCCCGGGCTGCTGGCCTACGTCATGGAGGAGTTGGAACGAGGTGTTCGCTCCTGGGAGGATGTGGACCCCGCTGTCTGCAGCCTGGATGAGCAGCTCAAGGCCTTCGTGTCCCGGCATTCAGCCACCTTCTCCAGCATTGTGAAAGGGCAGCGGAGCCTGCACCACCGTGGAGAGACCTTGGAGACGCTGGTCCTGCTGAACCCCTCAGACAAGTCCCTGTGTGATGAGCTCCGGAACCTCCTGATGGACCCCGCCCCTCACAAGCTGCTGGTCCTGGCCGGGCCCTGCCTGGAGGAGACTGGGGAACTGCTGTTG…
ENSMUSG00000074397	Foxr1	-0.2680520646958394	forkhead box R1 [Source:MGI Symbol;Acc:MGI:2685961]	ATGGGCAACGAGTGCTTCTTGACCTTCACCACGACACACTTGTCCGAGGCCGAGCAGAAACTTGCCCTGTACAGACTCCAACTTGTTGAACCACCAAAACTGCCTTTGGAAAAAAAAACCAACCCTGATAAAGATGGTCCAGACATTAAGCCCAATCTGTGGATGTGGGTGAACCCAAACATGGTGTATCCTCCCGGCAAGCTGGAGGTCGCAGTGAAAGAGGAAGACCAGAGTGCGCTGTCTGCCTTCCAGCCAGCCCTGAAAGAGGAAGAAGACAGCTGTTCAGAAGCTTCGGAGGTACAGCAGCCATTGCCTCCTTGCAGGCAGAAGAGGAAGCAGAGGAGAAGCACAGTGCCTCTTCCCCTAGCACCTGGGAGGAGGGCTCCACTCGAGAATCCG…
ENSMUSG00000030187	Klra2	-0.3643645230675844	killer cell lectin-like receptor, subfamily A, member 2 [Source:MGI Symbol;Acc:MGI:101906]	ATGAGTGAGCAGGAGGTCACTTACACAACTCTGAGATTTCATAAGTCTTCAGGGTTGCAGAACCCAGTGAGGCCTGAGGAGACTCAAAGGCCCAGAGATGTGGGCCACAGAGAGTGTTCAGTCCCCTGGAAGTTCATTGTGATAGTTCTTGGAATCCTCTGTTTCCTTCTGCTGGTAACTGTGGCAGTGTTGGTGATACACATTTTCCGGGATGGACAAGAGAAACATGAACAGGAGAAAACTCTAAATAACCTCCGTCAAGAGTACCAGGTCATGAAAAATGACAGCTCCTTAATGGAAGAAATGTTAAGAAATAAGTCTTCAGAGTGTAAGGCCCTCAATGATAGCCTGCACTACCTCAACAGAGAACAGAACAGATGCCTCAGGAAAACCAAGATT…
ENSMUSG00000031010	Usp9x	-0.3985062994205818	ubiquitin specific peptidase 9, X chromosome [Source:MGI Symbol;Acc:MGI:894681]	ATGACAGCCACGACTCGTGGCTCTCCAGTTGGAGGGAATGACAACCAGGGCCAAGCCCCTGATGGACAGTCTCAGCCCCCCCTCCAACAGAATCAGACTTCATCGCCTGATTCGTCCAATGAAAATTCCCCTGCAACTCCTCCTGATGAGCAAGGTCAAGGTGATGCTCCTCCACAGATTGAAGATGAGGAACCTGCATTTCCACACACTGACTTGGCAAAGTTAGATGATATGATCAACAGGCCTCGATGGGTTGTTCCAGTTTTGCCGAAAGGGGAATTAGAAGTGCTTTTAGAAGCTGCTATTGATCTTAGTAAGAAAGGCCTTGATGTTAAAAGTGAAGCATGTCAGCGATTTTTCCGAGATGGGCTAACGATCTCATTTACAAAAATCCTGACA…
ENSMUSG00000037594	Clba1	-0.43838727973969627	clathrin binding box of aftiphilin containing 1 [Source:MGI Symbol;Acc:MGI:2443738]	ATGCAAGGCGGGCAGGAGGTGGGGAGAGAGTCAGTGAGTGACCTCGCAGAGGAGCCTGGAGAGGGGTCCCCCCACCAGACAGCTAGAGGACAGAGTGGTGATGGTTTGGAACGGAGGCGGATCTGCTGCGACGGTCCCGTGGTTCTGCCGGACACGAACGCTAACAGCTCCAGGCTGGATGAGGGTCTTCCCACCAGCTGTCCACACCCGGGGGAGCTCAGCGGCGGGTGGGGAGAGTTCGAAGGCTTCCGGGAGTCTTCAGCTAAGTCGGAGCAGTTTTCTCAGTCTTTTGAACTCCTGGGGAGAGCCACGGAATGTCAGCCGCTGAGAACCCCTTCAGTCCCCGAAGAGGGCAGTTCTTGCCAGGTGCAGCAGGGTGGACCCTGGGTGACAGGAACT…
ENSMUSG00000027893	Ahcyl1	0.5094681179967965	S-adenosylhomocysteine hydrolase-like 1 [Source:MGI Symbol;Acc:MGI:2385184]	ATGTCGATGCCTGACGCGATGCCGCTGCCCGGTGTCGGGGAGGAGCTGAAACAGGCCAAGGAGATCGAGGACGCCGAGAAGTACTCCTTCATGGCCACGGTCACCAAGGCTCCCAAGAAGCAAATCCAGTTTGCTGATGACATGCAAGAGTTCACCAAATTCCCTACTAAGACTGGCCGGAGATCTTTGTCTCGTTCCATCTCACAATCCTCCACAGACAGCTACAGTTCAGCTGCATCCTATACAGATAGCTCTGATGATGAGGTTTCCCCTCGAGAGAAGCAGCAAACCAACTCGAAGGGCAGCAGCAATTTCTGTGTGAAGAACATCAAGCAGGCAGAGTTTGGACGCCGGGAGATTGAGATTGCAGAGCAAGACATGTCTGCTCTGATTTCACTC…
ENSMUSG00000101113	1700025B11Rik	0.16066608998134926	RIKEN cDNA 1700025B11 gene [Source:MGI Symbol;Acc:MGI:1923659]	ATGTCTACCAAAAACGAGGAACAGAATGAAGACCAATCTGAGAGTGTCGTCATCCCACATATCCAGGACCACCACTGCCTAGCCATTCTGGCTTTCTGTTTTTTCTTTCCACTAGGCTACTTAGCCTATCGCTCTTCTTGCAAGACAAGAACATACATAGAACAGAAGGAATATGAAAAGGCCAAAGCCACCTCCAGATGCACCTTCGCTTTTGTCTTGAGCTCCATCGCTGGAGGGTCCATCATCTTTTTCTGCTTATTCTCCCGACTCTTCTTTATGTGA
ENSMUSG00000000409	Lck	0.11900599516647761	lymphocyte protein tyrosine kinase [Source:MGI Symbol;Acc:MGI:96756]	ATGGGGGCCTCTGAGCTGACGATCTCGGGGATCATGGGCTGTGTCTGCAGCTCAAACCCTGAAGATGACTGGATGGAGAACATTGACGTGTGTGAAAACTGCCACTATCCCATAGTCCCACTGGACAGCAAGATCTCGCTGCCCATCCGGAATGGCTCTGAAGTGCGGGACCCACTGGTCACCTATGAGGGATCTCTCCCACCAGCATCCCCGCTGCAAGACAACCTGGTTATCGCCCTGCACAGTTATGAGCCCTCCCATGATGGAGACTTGGGCTTTGAGAAGGGTGAACAGCTCCGAATCCTGGAGCAGAGCGGTGAGTGGTGGAAGGCTCAGTCCCTGACGACTGGCCAAGAAGGCTTCATTCCCTTCAACTTCGTGGCGAAAGCAAACAGCCTG…
ENSMUSG00000050134	Olfr430	0.043871368040400066	olfactory receptor 430 [Source:MGI Symbol;Acc:MGI:3030264]	ATGGATCAACACAACTTCTCAAGCCTGACTGAGTTTGTGCTTCTTGGCTTCCCCAATGTGGAACACATCAGAAGCTGCCTTTTTGTCTTGCTGCTGTTGGTATACCTGTTCACCATTGGTGGTAATATGCTCATCTTCCTAGTCATACGACTGGATGCAGCCCTCCACAAACCCATGTACCACTTTGTCAGTGTTCTCTCTTTCTTGGAGTTATGGTATACAGCCACCACCATCCCTAAGATGCTAGCTAATCTTCTCAGTGAGAAGAAGACAATTTCTTTTGCAGGATGCCTCCTTCAGACCTATTTTTTCCACTCCCTTGGGGCCTCTGAATGCTACCTTCTTACAGCCATGGCCTATGATCGATACCTGGCCATCTGCCGACCCCTCCACTACCCT…
ENSMUSG00000032580	Rbm5	-0.11594151487902157	RNA binding motif protein 5 [Source:MGI Symbol;Acc:MGI:1933204]	ATGGGTTCAGACAAAAGAGTGAGTAGAACAGAACGTAGTGGAAGATATGGTTCCATCATAGATAGGGATGACCGTGATGAGCGTGAATCTAGAAGCAGGCGGCGGGACTCAGATTACAAAAGATCAAGCGATGATCGGAGAGGTGATAGATATGATGACTATCGGGACTATGATAGTCCAGAGAGAGAGCGTGAAAGAAGGAACAGTGACCGGTCTGAAGATGGCTATCATTCAGATGGTGACTATGGAGAACATGACTATAGACATGACATCAGTGATGAGAGAGAGAGCAAGACCATCATGCTCCGTGGCCTTCCTATCACCATCACCGAGAGCGATATTCGAGAAATGATGGAGTCCTTTGAAGGCCCTCAGCCTGCAGATGTGAGGCTGATGAAG…
ENSMUSG00000041523	Upk2	0.07686876105066612	uroplakin 2 [Source:MGI Symbol;Acc:MGI:98913]	ATGGCATCCACACTGCCTGTCCAGACCTTGCCCCTGATCCTGATTCTGCTGGCTGTCCTGGCTCCGGGGACTGCAGACTTCAACATCTCAAGCCTCTCTGGTCTGCTGTCTCCGGCGCTAACAGAAAGCCTGTTAATTGCCTTGCCCCCATGTCACCTCACGGGAGGTAATGCCACATTGATGGTCCGGAGAGCCAACGACAGCAAAGTGGTTAAGTCAGACTTTGTGGTGCCTCCATGTCGCGGGCGCAGGGAGCTTGTGAGCGTGGTGGACAGTGGGTCTGGCTACACCGTCACAAGGCTCAGCGCATATCAGGTGACAAACCTAACACCAGGAACCAAATACTACATATCCTACCGAGTACAGAAGGGGACATCCACCGAGTCCAGTCCAGAGACT…
ENSMUSG00000030049	Gkn2	0.7774019972586886	gastrokine 2 [Source:MGI Symbol;Acc:MGI:1913534]	ATGAAACCCCTCGTGGCATTTCTGGTGGTGCTGTCCATCTTTGGAATACAATCGCAGGCAGAGGAGATTTTTAATATCTTCGTCCCAAGCAAAAATGGAGGCAATATCCAGGAGACAGTGACCATCGACAACCAGCAGAACACGGCCACCATCAACATCCACTCAGGCTCGTGCTCCTCCACCACGATTTTTGACTATAAGCATGGTTACATCGCATCCCGGGTGCTCTCCCGGAGAGCCTGTTACGTCATCAAGATGGACCACAAAGCCATCCCTGCTCTGGACAAACTCCAACGGTTCCTCTACGAGAAGCAGACAATGAATGCTATCGACTCCCCAGAGTATACCTGGGTCAGGTACAACCCTCTGAAGTCTCTGATCACGAAGGTGGACTGGTTC…
ENSMUSG00000037499	Nenf	0.5253004654968908	neuron derived neurotrophic factor [Source:MGI Symbol;Acc:MGI:1913458]	ATGGCGCGCCCCGCGCCCTGGTGGCGGCTGCGGCTGCTGGCGGCGCTCGTCCTGGCGCTGGCTCTGGTCCCAGTGCCCTCAGCCTGGGCTGGGCAGACGCCGCGCCCCGCAGAGCGCGGGCCCCCGGTGCGGCTCTTCACCGAGGAGGAGCTGGCCCGCTACGGCGGCGAGGAGGAGGATCAGCCCATCTACTTGGCAGTGAAGGGAGTGGTGTTCGATGTCACCTCTGGGAAGGAGTTTTATGGACGAGGAGCCCCCTACAATGCCTTGGCCGGGAAGGACTCCAGCAGAGGTGTGGCCAAGATGTCACTGGATCCAGCAGACCTCACTCACGACACTACTGGTCTCACGGCCAAGGAGCTGGAGGCCCTCGATGACGTCTTCAGCAAGGTGTACAAA…
ENSMUSG00000035382	Pcsk7	-0.11594572742534223	proprotein convertase subtilisin/kexin type 7 [Source:MGI Symbol;Acc:MGI:107421]	ATGCCGAAAGGGAGGCAGAAAGTCCCACACTTGGATGCCCACCTGGGCCTGCCCATCTGCCTCTGGCTGGAATTAGCCATCTTCTTTCTGGTTCCCCAGGTCATGGGCCTATCAGAGGCAGGTGGGCTTGACATCTTGGGCACAGGGGGGCTGAGCTGGGCCGTACATCTGGACAGCCTAGAAGGTGAGAGGAAGGAAGAGAGTCTGACGCAACAGGCCGATGCTGTGGCCCAGGCAGCAGGGCTTGTGAATGCTGGGCGCATTGGAGAACTCCAGGGGCACTACCTCTTTGTCCAGCCTACTGGGCATAGGCAAGCCATGGAGGTGGAGGCCATGCGGCAACAGGCAGAGGCTGTGTTAGCCAGGCATGAAGCTGTGCGCTGGCACTCGGAGCAAACG…
ENSMUSG00000054385	Ceacam2	-0.3103173262044795	carcinoembryonic antigen-related cell adhesion molecule 2 [Source:MGI Symbol;Acc:MGI:1347246]	ATGGAGCTGGCCTCAGCACATCTCCACAAAGGGCAGGTTCCCTGGTTTGGACTACTGCTCACAGCCTCACTTTTAGCCTCCTGGAGCCCTCCCACCACTGCACAAGTGACTGTTATGGCTTTTCCACTCCACGCTGCTGAAGGCAACAATGTTATTCTAGTTGTTTACAATATGATGAAGGGAGTCTCGGCCTTTAGCTGGCACAAGGGATCTACTACGTCTACAAATGCTGAAATTGTACGATTTGTAACAGGCACTAATAAGACTATAAAAGGGCCTGTACACAGTGGCAGAGAGACACTATACAGCAATGGATCCCTGCTCATCCAAAGGGTCACCATGAAGGATACGGGAGTCTACACAATAGAAATGACAGATCAAAACTATCGTCGTAGGGTC…
ENSMUSG00000042404	Dennd4b	-0.32787432958531426	DENN/MADD domain containing 4B [Source:MGI Symbol;Acc:MGI:2446201]	ATGGAGGCAGATGCAGTGAGTGAAGCAGAGGCCATGGCAGAGGAGCGGCCTCCCCGGTTGGTGGATTACTTTGTGGTGGCTGGGCTTGCAGGAAATGGAGCGCCTATACCTGAGGAGAAGTGGGTTCCCGAGCCTACCGGGCCCCTGCGCCCTCCCCGGCCAGCTGAACCTATTACAGATGTGGCAGTCATCGCTAGGGCACTGGGCGAGGAGGTGCCCCAGGGCTATACATGCATTCAGACTTCTGCGGGTGGCCACCCCTTGGAGCTCAGTGCTGGGCTCCTGGGTGGAACTCAACCAGTCATCTGCTACCGCAGGGGGCGTGACAAGCCCCCCCTCGTTGAGCTGGGGGTGTTATATGAAGGGAAGGAACGACCCAAGCTTGGGTTCCAAGTGCTT…
ENSMUSG00000028581	Laptm5	0.08941420334689357	lysosomal-associated protein transmembrane 5 [Source:MGI Symbol;Acc:MGI:108046]	ATGGCCTCCCGTGCAGCGCCGGTCAGACAGACATGCTGTTGTTTCAACATCCGAGTCGCCACCATAGCCCTGGCCATTTACCACATAGTCATGAGTGTCCTGCTGTTCATTGAGCATGTGGTGGAGGTGGCCCGCGGTAAAGTGTCCTGTAGGTTCTTCAAGATGCCGTACCTCAGGATGGCTGACCTGCTCTCCAGCTTCCTGCTCATTGGCGTGCTCTTCATCATCAGCATCAGCCTGCTGTTCGGCGTGGTCAAGAACCGGGAGAAGTACCTGATACCCTTCCTGTCCCTTCAAATCATGGACTTCCTGCTCTGCCTGCTCACACTGCTGGGCTCCTACATCGAATTGCCAGCGTACTTGAAGCTTGCCCGGCCCCGGCCTGGTCCTTCTAAGGTC…
ENSMUSG00000049528	Olfr429	0.03850648304117846	olfactory receptor 429 [Source:MGI Symbol;Acc:MGI:3030263]	ATGGGCACTGGAAACTGGAGCCAAGTAATAGAATTCATCATTTTGGGCTTCCCTCACTTCCAAGGTGTCCAGATTTACCTGTTTTTCTTGCTGCTTTCCATTTACTTCACTACTATATTGGGAAACTTGCTGATATTCTTGGTGGTCTACCTGGACTCTCGGCTCCACACGCCCATGTACAGATTTGTCAGCATCCTTTCCTTCTTGGAGCTGGGCTACACAGCTGCCACCATTCCCAAGATGCTAGCGAACTTGCTGAGTGAGAAGAAGACGATTTCCTTTTCTGGATGTCTCCTACAGATCTACTTCTTTCACTCTCTTGGAGCTACTGAGTGCTACCTCCTGACAGCAATGGCATATGACAGGTACTTAGCCATTTGCAGGCCTCTCCACTATCCC…
ENSMUSG00000063972	Nr6a1	-0.25938925841547233	nuclear receptor subfamily 6, group A, member 1 [Source:MGI Symbol;Acc:MGI:1352459]	ATGGAGCGGGACGAACGGCCACCTAGCGGAGGGGGAGGCGGCGGGGGCTCGGCGGGGTTCCTGGAGCCGCCCGCCGCGCTCCCTCCGCCGCCGCGCAACGGTTTCTGTCAGGATGAATTGGCAGAGCTTGATCCAGGCACTAATGGAGAGACTGACAGTTTAACACTTGGCCAAGGCCATATACCTGTTTCCGTCCCAGATGATCGAGCTGAACAACGAACCTGTCTCATCTGTGGGGACCGCGCTACGGGCTTGCACTATGGGATCATCTCCTGCGAGGGCTGCAAGGGGTTTTTCAAGAGGAGCATTTGCAACAAACGGGTGTATCGGTGCAGTCGTGACAAGAACTGTGTCATGTCCCGGAAGCAGAGGAACAGATGTCAGTACTGCCGCCTGCTC…
ENSMUSG00000018476	Kdm6b	-0.5740470603032403	KDM1 lysine (K)-specific demethylase 6B [Source:MGI Symbol;Acc:MGI:2448492]	ATGCATCGGGCAGTGGACCCTCCAGGGGCCCGCTCTGCACGGGAAGCCTTTGCCCTTGGGGGCTTGAGCTGTGCTGGGGCTTGGAGCTCCTGCCCACCCCATCCTCCTCCCCGAAGCTCATGGCTGCCCGGAGGCAGATGCTCTGCCAGCGTTGGGCAGCCCCCACTCTCAGCTCCTTTACCCCCATCTCATGGCAGTAGCTCCGGGCACCCTAACAAACCCTATTATGCTCCTGGGACACCCACCCCAAGACCCCTTCACGGGAAGTTGGAATCCCTACATGGCTGTGTCCAGGCATTGCTCCGGGAGCCAGCGCAGCCAGGGTTGTGGGAACAGCTTGGACAGTTGTATGAATCAGAGCACGACAGTGAGGAAGCCGTATGCTGCTACCATAGGGCC…
ENSMUSG00000046532	Ar	-0.37014892180986825	androgen receptor [Source:MGI Symbol;Acc:MGI:88064]	ATGGAGGTGCAGTTAGGGCTGGGAAGGGTCTACCCACGGCCCCCATCCAAGACCTATCGAGGAGCGTTCCAGAATCTGTTCCAGAGCGTGCGCGAAGCGATCCAGAACCCGGGCCCCAGGCACCCTGAGGCCGCTAACATAGCACCTCCCGGCGCCTGTTTACAGCAGAGGCAGGAGACTAGCCCCCGGCGGCGGCGGCGGCAGCAGCACACTGAGGATGGTTCTCCTCAAGCCCACATCAGAGGCCCCACAGGCTACCTGGCCCTGGAGGAGGAACAGCAGCCTTCACAGCAGCAGGCAGCCTCCGAGGGCCACCCTGAGAGCAGCTGCCTCCCCGAGCCTGGGGCGGCCACCGCTCCTGGCAAGGGGCTGCCGCAGCAGCCACCAGCTCCTCCAGAT…
ENSMUSG00000024601	Isoc1	-0.17662601677589204	isochorismatase domain containing 1 [Source:MGI Symbol;Acc:MGI:1913557]	ATGGCGGCGGCGGAGCCCTCGGTGGCCGCGCTGGCGGGCGGCGGTGTGGGCGCGGGGGCGCCGTCGGGCGGCGTGCCGGTGCTCTTCTGCTTCTCGGTGTTCGCGCGGCCCGCGTCGGTGCCCCACGGCGCGGGCTACGACGTGCTCATCCAGAAGTTCCTGAGCCTGTACGGCGATCAGCTCGACATGCACCGCAAATTCGTGGTGCAGCTCTTCGCCGAGGAGTGGGGTCAGTACGTGGACCTGCCCAAGGGCTTCGCGGTGAGCGAGCGCTGCAAGCTGCGCCTGGTGCCGCTGCAGATCCAGCTTACGACCCTGGGAAATCTCACACCTCCGAGCACTGTGTTTTTCTGCTGTGACATGCAGGAAAGGTTCCGTCCAGCCATCAAATACTTTGGG…
ENSMUSG00000002014	Ssr4	0.19491210833462594	signal sequence receptor, delta [Source:MGI Symbol;Acc:MGI:1099464]	ATGGCGGCGATGGCATCTTTCGGCGCCCTGGCACTACTCCTGCTGTCTGGCCTATCTTGCTGCTCAGCAGAGGCCTGCCTGGAACCACAGATCACCCCTTCTTACTATACAACTTCAGATGCCGTCATTTCTACAGAGACTGTATTCATCGTGGAGATTTCACTGACCTGCAAGAACAGGGTCCAGAACATGGCTCTTTATGCCGACGTTAGTGGAAAACAATTTCCTGTAACCCGCGGCCAGGATGTGGGTCGATATCAGGTGTCCTGGAGCCTGGAGCACAAGAGCGCTCATGCGGGCACCTATGAGGTCAGATTCTTTGATGAAGAGTCCTATAGCCTCCTAAGGAAGGCTCAGAGAAATAATGAGGACGTTTCTATCATTCCACCCCTGTTCACA…
ENSMUSG00000033014	Trim33	-0.7599375036853405	tripartite motif-containing 33 [Source:MGI Symbol;Acc:MGI:2137357]	ATGGCGGAAAACAAAGGCGGCGGTGAGGCAGAGAGTGGCGGCGGGGGCAGCGGTAGCGCGCCGGTAACCGCCGGGGCCGCCGGGCCCACGGCGCAGGAGGCGGAGCCGCCTCTCGCCGCGGTGCTGGTGGAGGAGGAGGAGGAGGAAGGCGGCAGGGCTGGCGCGGAGGGCGGTGCGGCTGGGCCCGACGACGGGGGGGTGGCCGCGGCCTCCTCAAGCTCGGCCCCGGCCGCCTCGGTCCCCGCGGCCTCAGTGGGCTCCGCGGTCCCCGGAGGCGCGGCATCGACGCCGGCTCCAGCTGCTGCCCCAGCCCCGGCCCCGGCCCCGGCCCCGGCCCCGGCCCCCGCTCCCGCCCCGGCTCCTGGTTCCTCGTCGGGGCCACCTCTCGGACCACCAGCC…
ENSMUSG00000031411	Prame	-0.4402610709286664	preferentially expressed antigen in melanoma [Source:MGI Symbol;Acc:MGI:1923079]	ATGATGATGGATGAAAGAGACCCATCCTCGCTTTTGGATCTGGCTATACAGAGTCTACTAAGTAATGAGCTTGTAGCAATTCATTCTCTGGGGGAGATCCCAAGGGAGCTTTTTGTTCCATTGTTCTCTGCTGCCTTCACGGGAGGATATAGGAAGATACTGACTTCAATGGTGAAGATTTGGCCTTTTACCTGTCTCCACATTGGAACATTAAGTGTACAGGAACCCCAGCGTGAACTCCTGAAAGCCATGGTTGAGAGTCTTCAGTTTCTTCCTGCCCAGGACTGTTCTTCTGGGGGCCCTAAGTTGAGGATCCTAGATGTAAGGCAGGGTGTTGACTGCAAGACAACATGCCCTGATTTTGGTGCCAGATCTCCAACTTGTTTTCATGGTTGTACT…
ENSMUSG00000017428	Psmd11	0.30401862777775523	proteasome (prosome, macropain) 26S subunit, non-ATPase, 11 [Source:MGI Symbol;Acc:MGI:1916327]	ATGGCGGCCGCAGCGGTGGTGGAGTTCCAGAGAGCCCAGTCTCTACTCAGCACCGACCGGGAGGCCTCCATCGACATCCTCCACTCCATCGTGAAACGTGACATTCAAGAAAATGATGAGGAGGCAGTCCAGGTCAAAGAGCAGAGCATCCTTGAACTGGGTTCTCTCCTGGCGAAGACTGGACAAGCTGCTGAGCTTGGAGGACTCCTGAAGTATGTACGGCCTTTCTTGAATTCCATCAGTAAAGCTAAAGCAGCTCGTCTGGTCCGGTCTCTTCTTGATCTGTTTCTAGATATGGAAGCAGCCACAGGGCAGGAGGTCGAGCTATGTTTAGAGTGCATCGAATGGGCCAAATCAGAGAAAAGAACTTTCTTACGCCAAGCATTGGAGGCAAGGCTG…
ENSMUSG00000058252	Tcp11x2	-0.3258182768554275	t-complex 11 family, X-linked 2 [Source:MGI Symbol;Acc:MGI:1919091]	ATGCCCAAGAGTGAGAAAATTATATCCAAAAAGGACTCCAGTCCATCTGAAAATGGATCCCCAAAACCAGAAACATCAAGCAAGAACCAGGAAGATAAGACCAGTTCAGAGGTCCACTCTGCAGAGAACCAGCTTGCAGCAATTTCTAATGAAGATACAGGAAAAGTTAATGAAGTTTCCAAATTGAATGTTGCTTCTGAAATTGCCATAGAAAAGAATGATTTACCTGAAGACAGTCCAGAAAGCCAATTCGTGGAGACAATGTACAATGCATTTTGGGACCACTTGAGAGATCAACTGTCACAAACCCCTCCTGACTTTTCTTGTGTTCTTGAACTTATAAAAAACATAAAACAGATTTTAATGGCACTACTATTACCACGTCAGAATCTTCTAAGA…
ENSMUSG00000000532	Acvr1b	0.4795245165957863	activin A receptor, type 1B [Source:MGI Symbol;Acc:MGI:1338944]	ATGGCGGAGTCGGCCGGAGCCTCCTCCTTCTTCCCCCTTGTTGTCCTCCTGCTCGCCGGCAGCGGCGGGTCCGGGCCCCGGGGGATCCAGGCTCTGCTGTGTGCGTGCACCAGCTGCCTACAGACCAACTACACCTGTGAGACAGATGGGGCTTGCATGGTCTCCATCTTTAACCTGGATGGCGTGGAGCACCATGTACGTACCTGCATCCCCAAGGTGGAGCTGGTTCCTGCTGGAAAGCCCTTCTACTGCCTGAGTTCAGAGGATCTGCGCAACACACACTGCTGCTATATTGACTTCTGCAACAAGATTGACCTCAGGGTCCCCAGCGGACACCTCAAGGAGCCTGCGCACCCCTCCATGTGGGGCCCTGTGGAGCTGGTCGGCATCATCGCCGGC…
ENSMUSG00000047671	Tctex1d4	-0.07194183908788707	Tctex1 domain containing 4 [Source:MGI Symbol;Acc:MGI:3045358]	ATGGCTTGCAGGACCCTGCCATCCAGACGCCAGGAAGAGGAGACTACCAAAGACCTGGCTCTGAAATTACCACCAGGGAAACCTGGAGGTCACCTGCCCAGCATTGATGAGACCCGACCTATAGGCCCAGGCCCAGCCTCCCGTCGTGGCTCCCTGCCGGGCCTACACCCATCCTTTTCGCGCCGCAACTCACTGGCGGGACCCTTAGTGGGTCCTGGAGGTCGACGACCATCCCTGGGCCCAGTGCCCCCTCTAGGTTCACGAGTTAGTTTTTCTGGGCTGCCCCTGATGCTTCCCCGTAGGATGGCACCCTCATACCGCTTAGAACCGGCGCCTGGGGAACACTGGGAAGCTGCAGGTGCCCAGCGGGCCCTGGAGGCAGCACTGACCACACAGCTG…
ENSMUSG00000038900	Rpl12	0.6938255063813671	ribosomal protein L12 [Source:MGI Symbol;Acc:MGI:98002]	ATGCCGCCCAAGTTCGACCCCAACGAGGTCAAAGTCGTGTACCTGAGGTGCACCGGAGGCGAGGTCGGCGCCACATCCGCCTTGGCCCCGAAGATCGGTCCTCTGGGTCTGTCTCCGAAGAAAGTTGGCGATGACATTGCCAAGGCTACCGGTGACTGGAAGGGTCTCAGAATTACAGTGAAACTGACCATCCAGAACAGACAGGCCCAGATCGAGGTGGTGCCTTCTGCCTCAGCCCTGATCATCAAAGCCCTCAAGGAGCCACCGAGAGACAGGAAGAAGCAGAAGAACATTAAACACAGTGGGAACATTACTTTTGATGAGATTGTCAACATTGCCCGGCAGATGAGACACCGGTCTTTGGCTAGAGAACTTTCTGGAACTATCAAGGAGATCCTG…
ENSMUSG00000055540	Epha6	-0.18301559173757073	Eph receptor A6 [Source:MGI Symbol;Acc:MGI:108034]	ATGCAATTCCCCTCGCCTCCAGCCGCCAGGAGCTCCCCGGCGGCGCAGGCAGCATCGTCCCCGCAAGCAGCTGCTCCAGCACCTGGGCAGCCTGGACCCTCGTGCCCTGCGCACCGGGCCTCGCGCGGGGGGCGCCCCGGGACTTCCCCTGCGGACCGGGTGGAGGAGGAAGAGGAGGAGGAGGAAGAAGAAGAGAGCTTGGTTCAGGACCCCCACGCTACTAGGAACACCTGGCTGCGCTGCTGCCACTTCTTTTTAAGGAGGAGAAGAGAACCAACCAGAGCCATGGGGGGCTGCGAAGTCCGGGAATTTCTTTTGCAATTTGGTTTCTTCTTGCCCCTGCTAACGGCTTGGACCGGCGACTGCAGTCACGTCTCCAACCAAGTTGTGTTGCTTGAT…
ENSMUSG00000030603	Psmc4	0.7805324600819971	proteasome (prosome, macropain) 26S subunit, ATPase, 4 [Source:MGI Symbol;Acc:MGI:1346093]	ATGGAGGAGATAGGCATTTTGGTGGAAAAGATTCAGGATGAGATTCCAGCACTGTCCGTGTCTCGGCCGCAGACCGGCCTGTCCTTTCTGGGACCCGAACCTGAAGACCTGGAGGACCTGTACAGCCGCTACAAGAAGCTGCAGCAGGAGCTGGAGTTCCTGGAAGTGCAGGAGGAGTATATCAAGGACGAGCAGAAGAACCTGAAGAAGGAATTCCTCCACGCCCAGGAGGAGGTGAAGCGGATCCAGAGCATCCCCTTGGTCATCGGTCAGTTCTTGGAAGCTGTGGATCAGAACACAGCCATCGTGGGCTCCACCACAGGCTCTAACTATTATGTGCGCATCCTGAGTACCATCGACCGGGAGCTGCTCAAGCCCAACGCCTCGGTGGCCCTGCAC…
ENSMUSG00000039849	Pcif1	-0.5259109182768825	PDX1 C-terminal inhibiting factor 1 [Source:MGI Symbol;Acc:MGI:2443858]	ATGGCCAATGAGAATCACGGCAGCCCCCGGGAAGGAGCCTCCCTTCTAAGTCACTCTCCAGGCACCTCCAGTCAGAGCCAGCCCTGTTCTCCAAAGCCAGTTCGCCTGGTACAGGACCTTCCAGAGGAGCTGGTACATGCAGGCTGGGAGAAGTGCTGGAGCCGGAGGGAGAGCCGTCCCTACTACTTCAACCGATTCACCAACCAGTCTCTGTGGGAGATGCCCGTGCTGGGTCAGCACGACGTGCTTTCGGACCCTCTGGGGCTGAATGCAACCCCACTGCCCCAAGACTCAAGCTTGGTGGAAACGCCCCCAGTAGAGAACAAGTCCAGAAAGCGACAGCTCTCAGAGGAGCAGCCAAGTGGCAACGGAGTGAAGAAGCCCAAGATTGAAATCCCT…
ENSMUSG00000026504	Sdccag8	-0.40162803165751926	serologically defined colon cancer antigen 8 [Source:MGI Symbol;Acc:MGI:1924066]	ATGGCGAAGTCCCCAGGGAACTCTACCCTGGAGGACAGTCTGGGGCAATACCAACGGAGTCTCCGGGAACGTGCCAATAGAAGCATTCACCAGTTGAAATGTGCCCTGAGAGAAGTGGATGTCACTGTAGAAGAAGATGCACTGGATCCTTCCACCAGCATCAACGTAGAAAATGAGGACACAGGGGTGGCCTGGCATGAGCTGCAGCACAGCCATGCTGTCAATCAACTGAAAGCTTTGTTGCGTCAACAAACAAATAAGGAAAATGAGACATCTCCACCGCGAAGACGAAAGTTGTCCCCTTCGCGGCCGTCAGAATGTGACGATGGCAGCATGCCCACCATGCACAACCTCGTTCCTATCATTAACGACCAGTCTCAATATATCCACCACTTAGAA…
ENSMUSG00000038994	Hils1	0.09266536177236909	histone H1-like protein in spermatids 1 [Source:MGI Symbol;Acc:MGI:2136691]	ATGGCTCAAATGGTGGCTGGAGACCAAGATGCCGGCACACTGTGGGTCCCAAGCCAGAGTGAGAGTCAAACTGAGTCCGACATCAGTACCCAAAGCCTGCGGAAGCCCACCATGTCGTATGTGATTCTGAAGACTTTGGCTGACAAGCGGGTACATAATTGTGTGTCCCTTGCTACCTTGAAGAAAGCTGTGTCTATCACAGGGTACAATATGACCCATAACACCTGGCGCTTCAAGCGTGTGCTCCAGAATCTACTCGATAAAGGCATGATCATGCATGTGACCTGCTGCAAGGGTGCCTCCGGCTCCCTCTGCCTGTGCAAGGAGCGGGCCCTCAAGTCCAACCACAGGGCCAAGAGATGCCAGGACAGACAGAAGAGCCAGAAGCCTCAGAAGCCT…
ENSMUSG00000035576	L3mbtl1	-0.6273876053533173	L3MBTL1 histone methyl-lysine binding protein [Source:MGI Symbol;Acc:MGI:2676663]	ATGGAGGGGCACACTGACATGGAGATACTAAGGACAGTGAAAGGGTCTTCCACAGGGGAGGTCAACGTGCACCTGGTGGCCAGAGACAGCGCAGGTCCCCACCCTCAGCTGCCTACAACCGCCTTCATTATTCCTACCAATGCAGCTACGCTTGGTCTGCCTAGCACTGCCCTGGATGTGCCCTATCCCCGGGAGCCAGTCCACGTGGGTGCCCTGGAGCGGGTGGCTGGCAGCGAACCCGTAACAGCTACTATTCTGCCACAGCTAAGCACTGGAACGGGGACCAATAGCACAGTCAGGCTTCTGGATTGGACTGGCGTTTCTGCACCTTTACCTGGTAGCGGCATGCGGTTCCGGATAAATGAGTACGCGCCACTGAACATGATAGGAGTGGAGCGA…
ENSMUSG00000001508	Sgca	-0.20923708903936786	sarcoglycan, alpha (dystrophin-associated glycoprotein) [Source:MGI Symbol;Acc:MGI:894698]	ATGGCAGCAGCAGTAACTTGGATACCTCTCCTGGCAGGTCTCCTGGCAGGACTGAGGGACACCAAGGCCCAGCAGACAACTTTACACCTACTTGTGGGTCGTGTGTTTGTGCATCCTTTGGAACATGCCACCTTCCTGCGCCTTCCAGAACACGTTGCGGTGCCACCCACTGTCCGACTCACCTACCACGCTCACCTCCAGGGACATCCAGACCTGCCCAGGTGGCTGCACTACACACAGCGCAGTCCCTATAACCCTGGCTTCCTCTACGGCTCCCCCACTCCAGAAGATCGTGGGTACCAAGTCATCGAGGTCACAGCCTACAATCGAGACAGTTTTGACACCACTAGACAGAGGCTGCTGCTGCTGATTGGGGACCCCGAAGGTCCCCGGTTGCCA…
ENSMUSG00000012117	Dhdds	0.10542791823337563	dehydrodolichyl diphosphate synthase [Source:MGI Symbol;Acc:MGI:1914672]	ATGTCATGGATCAAAGAAGGAGAGCTGTCACTGTGGGAACGGTTCTGTGCTAACATCATAAAGGCTGGCCCAGTACCCAAACATATCGCGTTCATAATGGACGGCAACCGTCGCTATGCCAAGAAGTGTCAGGTGGAGCGCCAGGAGGGCCACACACAGGGCTTCAATAAGCTTGCTGAGACTCTCCGCTGGTGTTTGAACCTGGGCATCCTAGAAGTGACTGTCTACGCATTCAGCATTGAGAACTTCAAACGTTCCAAGAGTGAGGTTGACGGACTCCTGGATCTAGCCAGACAGAAGTTCAGCTGCTTGATGGAAGAACAGGAGAAGCTGCAGAAGCACGGGGTGTGCATCCGCGTCCTGGGTGATCTGCATCTGCTGCCCTTGGACCTCCAGGAG…
ENSMUSG00000026796	Fam129b	0.014128004818949515	family with sequence similarity 129, member B [Source:MGI Symbol;Acc:MGI:2442910]	ATGGGAGACGTACTGTCCACACACCTGGATGACGCACGGCGCCAGCACATCGCAGAGAAAACCGAGAAGATCCTCACAGAGTTCCTTCGCTTCTATGAGGACCAGTATGGTGTCTCCCTCTTCAATAGCATGCGCCATGAGATCGAGGGCACCGGGCCACCGCAGGCACAGCTGCTCTGGCGCAAGGTGCCCCTGGATGAACGCATCATCTTCTCCGGAAACCTTTTCCAGTACCAGGAAGACAATAAGAAGTGGAGAAACCGCTTCAGCCTGGTGCCCCATAACTATGGGCTGGTGCTATATGAGAACAAAGTGGCCTATGAGCGGCAGATACCACCCCGGGCCGTCATCAACAGCGCGGGCTACAAGGTTCTCACCTCTGTCGACCAGTATCTGGAG…
ENSMUSG00000021338	Carmil1	-0.35066118240061106	capping protein regulator and myosin 1 linker 1 [Source:MGI Symbol;Acc:MGI:1915982]	ATGACCGACGAGAGCTCCGATGTCCCCCGGGAGTTAATGGAAAGCATCAAGGATGTTATTGGCAGGAAGATCAAAATCTCAGTGAAGAAGAAAGTGAAGTTGGAAGTGAAGGGCGACAGGGTGGAAAACAAAGTGCTGGTGCTCACATCATGCCGAGCCTTCCTCCTGTCAGCACGCATCCCCAGCAAGCTCGAGTTAACCTTCAGTTATCTAGAGATTCATGGAGTCATCTGCCACAAGCCAGCCCAGATGGTTGTGGAGACTGAGAAGTGTAACATGTCCATGAAGATGGTGTCCCCAGAGGATGTGAGTGAAGTGCTGGCTCACATAGGCACCTGCTTGCGGAGGATATTCCCAGGCCTTTCCCCACTGAGAATCATGAAGAAAGTCTCCATGGAG…
ENSMUSG00000000531	Grasp	-0.32793411558406593	GRP1 (general receptor for phosphoinositides 1)-associated scaffold protein [Source:MGI Symbol;Acc:MGI:1860303]	ATGACCCTCCGCCGACTCAGGAAGCTGCAGCAGAAGGAGGAGGCGACTGCCGCGCCGGACCCCGCTGGCCGGGCTCCCGACTCCGAAGCCGCTCGCGCCGCCCCGCTACCCTCCGGCCCTCCGGCTGCCGCCGCTCCGCCCGGAGCCCCCGGGGAGGAGCTGTACGCAGCACTGGAGGACTATCACCCTGCCGAGCTGTACCGCGCGCTCGCCGTGTCCGGGGGTACCCTGCCTCGCCGAAAGGGCTCAGGATTCCGTTGGAAGAATTTCACTCAGAGTCCTGAACAGCAACGGAAGGTTCTAACTTTGGAGAAAGGGGACAACCAGACCTTTGGCTTCGAGATCCAGACATATGGCCTTCACCACCGAGAGGAGCAGCGTGTAGAGATGGTGACCTTC…
ENSMUSG00000027575	Arfgap1	-0.30903597255141213	ADP-ribosylation factor GTPase activating protein 1 [Source:MGI Symbol;Acc:MGI:2183559]	ATGGCCAGCCCAAGAACCAGGAAAGTTCTTAAGGAAGTCCGGGCACAGGATGAGAATAATGTTTGCTTTGAGTGTGGTGCGTTCAATCCTCAGTGGGTCAGCGTGACTTATGGCATCTGGATCTGCCTGGAATGCTCTGGGAGACACCGTGGGCTTGGGGTGCACCTCAGCTTTGTGCGCTCTGTTACAATGGACAAATGGAAGGACATTGAGCTGGAGAAGATGAAGGCTGGTGGGAATGCTAAGTTCCGAGAGTTCCTGGAGACACAGGACGACTATGAGCCTAGCTGGTCACTGCAGGACAAGTACAGCAGCAGAGCCGCGGCGCTCTTCAGGGATAAGGTGGCTACTTTGGCAGAAGGTAAAGAGTGGTCTCTGGAGTCATCGCCTGCACAGAAC…
ENSMUSG00000004530	Coro1c	0.11391422906697271	coronin, actin binding protein 1C [Source:MGI Symbol;Acc:MGI:1345964]	ATGCGGCGAGTGGTGCGGCAGAGCAAGTTCCGCCACGTCTTTGGACAGGCGGTGAAGAATGACCAGTGCTATGACGACATCCGTGTCTCCCGAGTCACCTGGGACAGTTCCTTTTGTGCCGTCAACCCCAGATTCGTGGCCATCATCATAGAAGCGAGTGGGGGAGGGGCCTTCCTGGTGCTCCCTCTGCACAAGACGGGACGAATTGACAAATCCTACCCTACAGTGTGTGGCCACACAGGACCAGTGCTGGACATAGACTGGTGTCCACATAATGACCAGGTCATTGCCAGCGGCTCAGAGGACTGCACTGTTATGGTTTGGCAGATCCCGGAAAATGGACTCACCCTTTCCCTGACCGAGCCTGTGGTGATTCTAGAAGGGCACTCAAAAAGAGTT…
ENSMUSG00000005882	Uqcc1	0.13883550975283745	ubiquinol-cytochrome c reductase complex assembly factor 1 [Source:MGI Symbol;Acc:MGI:1929472]	ATGGCGTTGCTGGTGCGAGTCCTTAGGAACCAGACTAGCATCTCTCAGTGGGTTCCAGTATGCAGCCAACTGGTATCAGTGTCTCCTACCCAAAGACAGTGGAGCAGCACTTCCCAGTGGCTCCAGAAGAATCAGTCTCGAGTGTGTTTGGGATCAGAACAGACTGTTGGAGCGGACACAGCGCAGAATAGGAAATACCACAACACAAGTAAGCTTCTTACTACCCAAGATTTCCCACAGCCTGTTGAAGAGAAGGTCGGTCCCTTCACGAAGATAATAGAAGCCATGGGATTCACTGGACCTTTGAAATACAGTAAATGGAAGATCAAGATCGCGGCCCTCCGCATGTACACGAGCTGCGTGGAGAAGACTGACTTCGAGGAGTTCTTTCTGAGGTGT…
ENSMUSG00000033208	S100b	0.746459520045983	S100 protein, beta polypeptide, neural [Source:MGI Symbol;Acc:MGI:98217]	ATGTCCGAGCTGGAGAAGGCCATGGTTGCCCTCATTGATGTCTTCCACCAGTACTCCGGGCGAGAGGGTGACAAGCACAAGCTGAAGAAGTCAGAACTGAAGGAGCTTATCAACAACGAGCTCTCTCACTTCCTGGAGGAAATCAAGGAGCAGGAAGTGGTGGACAAAGTGATGGAGACGCTGGACGAAGATGGGGATGGGGAGTGTGACTTCCAGGAGTTCATGGCCTTCGTCGCCATGGTGACCACGGCCTGCCATGAGTTCTTTGAACATGAGTGA
ENSMUSG00000057021	Vmn2r-ps159	-0.2940268963839864	vomeronasal 2, receptor, pseudogene 159 [Source:MGI Symbol;Acc:MGI:1316735]	ATGAAGAAGCTCTGTGCTTTCACGATTTCATTGTTGTTTCTGAAGTTTTCTCTCATCTTGTGCTGTTGGAGTGAACCAAGTTGCTTTTGGAGGATAAAGAATAGTGATGATAATGACGGAGATTTGCAAAGGGAATGTCATTTTTACCTTGGGGCAGCTGATACACCAGTTGAAGATAATTTTTATAGTTCACTTTTAAAATTTAGAATTGCAGCAAGTGAATATGAGTTTCTTCTCGTAATGTTTTTTGCTATCGATGAGATCAACAGGAATCCTTATCTTTTACCCAACATAACTTTGATGTTCTCCTTCATTGGTGGAAACTGTCAGGATTTATTGAGAGTTATGGACCAAGCATATACACAAATAAATGGACATATGAATTTTGTTAATTATTTC…
ENSMUSG00000021440	Cts7	0.12646265851767993	cathepsin 7 [Source:MGI Symbol;Acc:MGI:1860262]	ATGACTCCTACTGTCTTCCTGTCCATCCTGTGCTTGGGAGTGGCCTTGGCTGCTCCAGCACCTGATTACAATTTGGATGCCGAGTGGGAGGAGTGGAAGAGGAGCAATGACAGAACATACAGCCCAGAGGAAGAAAAACAGAGGAGAGCAGTGTGGGAAGGAAATGTGAAATGGATCAAACAGCACATTATGGAGAATGGCCTGTGGATGAACAACTTCACCATAGAAATGAATGAATTTGGTGATATGACTGGTGAAGAAATGAAAATGTTGACAGAAAGCTCATCTTATCCTCTAAGAAATGGGAAACACATCCAGAAACGCAACCCCAAAATCCCCCCAACTTTGGATTGGAGAAAGGAAGGCTATGTGACTCCAGTGCGAAGACAGGGAAGTTGT…
ENSMUSG00000070034	Sp110	-0.05177999792283314	Sp110 nuclear body protein [Source:MGI Symbol;Acc:MGI:1923364]	ATGTTCACTCTGACCAAAGCCTTGGAAAAGGCTCTTCTCCAGCATTTCATATACATGAAGGTGAACATCGCCTATGCCATCAACAAGCCATTCCCCTTCTTCGAAGCGCTCCGGGACAATTCCTTCATCACTGAGAGAATGTACAAGGAATCTCTGGAAGCCTGTCAAAATCTGGTCCCTCTGTCCAAAGTGGTGCACAATATTCTCACCAGTCTGGAGCAGACTTTCCACCCGTCAGTGCTGCTGACGTTGTTCAGCAAGGTCAACCTCCGGGAATACCCCAGCCTGGTGGCAATTTTCAGAAGCTTCAGAAACGTTGGTTATACCTACGAAGAGAAAAACAGACCCCCACTGACCCTGCTTGAAGACCTGGCCAACCCAGCAGAAGGGTGCTCCCTT…
ENSMUSG00000003283	Hck	0.35357719059260573	hemopoietic cell kinase [Source:MGI Symbol;Acc:MGI:96052]	ATGGGATGCGTGAAGTCCAGGTTCCTCCGAGATGGAAGCAAGGCCTCAAAAACAGAGCCAAGTGCCAATCAGAAGGGCCCTGTGTATGTGCCGGATCCCACGTCCTCCAGCAAGCTGGGACCAAACAACAGCAACAGCATGCCCCCAGGGTTTGTGGAGGGCTCTGAGGATACCATTGTGGTCGCACTGTACGACTATGAGGCTATTCACCGTGAAGACCTCAGCTTCCAGAAGGGAGACCAGATGGTGGTTCTGGAGGAGGCTGGGGAGTGGTGGAAGGCACGGTCCCTGGCTACCAAGAAGGAAGGCTACATCCCAAGCAACTATGTGGCTCGAGTTAACTCTTTGGAGACAGAAGAGTGGTTCTTCAAGGGGATCAGCCGGAAGGATGCAGAGCGC…
ENSMUSG00000020231	Dip2a	-0.045404127262856336	disco interacting protein 2 homolog A [Source:MGI Symbol;Acc:MGI:2385920]	ATGGCCGACCGCGGATGCCCTCTGGAGGCGGCGCCGCTGCCCGCCGAGGTGCTCGAGAGCCTGGCGGAGCTGGAGCTGGAGCTGTCCGAAGGTGACATCACTCAGAAAGGATATGAGAAGAAGAGGGCGAAGCTGCTGGCTCGGTACATCCCCCTCATTCAAGGAGTAGACCCATGTCTGCAGACAGAGAATAGAATTCCCGGGCCCTTGCTGACGGCAGCTACCGCTAAACCACAGAAGTCTCGGGCTACCAACTCCAGGGATGAGCGCTTCCGGTCAGATGTTCACACGGAAGCCGTGCAAGCAGCTTTGGCCAAGTACAAGGAGAGGAAGATGCCCATGCCTTCAAAGAGACGCTCCGCCCTTGTGCACTCCTCCGTTGAGACCTACACGCCTCCA…
ENSMUSG00000025937	Lactb2	0.2846243513659621	lactamase, beta 2 [Source:MGI Symbol;Acc:MGI:2442551]	ATGGCTGCCGCTCTGCAGCGCATCGAGCAGCTGTCCAGTCGGGTGGTGCGCGTGTTGGGCTGCAACCCGGGTCCCATGACCCTGCAAGGCACCAACACGTACCTGGTGGGGACCGGCAGCAGGAGAATCCTCATTGACACTGGTGAGCCATCAGTTCCAGAATATATCAGCTGTTTAAAGCAAGCCTTGGTTGAGTTTGACACAGCAATCCAGGAAATCCTGGTGACACACTGGCATTCTGATCATTCTGGAGGCATTGTAGACATTTGTAAAAACATCAATAATGACACCACCTACTGCATTAAAAAACTTCGACGGAATCCCCAGAGAGAAGAAATTATAGGAAATGGAGAACAGCAATTTATTTATATAGAAAACGGAGACGTGGTTAAGACCGAG…
ENSMUSG00000022951	Rcan1	-0.016111809763719263	regulator of calcineurin 1 [Source:MGI Symbol;Acc:MGI:1890564]	ATGGAGGACGGCGTGGCCGGGCCGCGGCTCGGAGAGGTGGCGGAGGCGGTCGAGGCACGGGCGCCCCGTAGGGTGACTCTGCGGCCCTTCGCGCCCTTCTCTGCGGCTGCCGAGGGGGACGGGGGCGGCGGCGGCGACTGGAGCTTCATCGACTGCGAGATGGAGGAGGTGGATCTGCAGGACCTGCCGAGCGCCACCATCGCCTGCCACCTGGACCCGCGCGTGTTCGTGGACGGCCTGTGCCGGGCCAAATTTGAATCCCTCTTCAGAACATATGACAAGGACACCACCTTCCAGTATTTTAAGAGCTTCAAACGTGTCCGGATAAACTTCAGCAACCCCTTATCTGCAGCCGATGCCAGGCTGCGGCTGCACAAGACCGAGTTCCTGGGGAAGGAA…
ENSMUSG00000021012	Zc3h14	-0.867884859931065	zinc finger CCCH type containing 14 [Source:MGI Symbol;Acc:MGI:1919824]	ATGGAAATCGGCACCGAGATCAGCCGCAAGATCCGGAGTGCCATTAAGGGGAAATTACAAGAATTAGGAGCTTACGTAGATGAAGAACTTCCTGATTACATTATGGTGATGGTGGCCAACAAGAAAAGTCAGGACCAAATGACAGAGGACCTGTCCCTGTTTCTAGGGAACAACACAATTCGATTCACCGTATGGCTCCATGGTGTATTAGATAAACTGCGCTCTGTCACGACTGAGCCCTCTAGTCTAAAGTCTCCTGACGCCAGCATCTTCGATAGTCACGTGCCTTCAAACAAGAGCAGTTTCAGTCGGGGAGATGAGAGAAGGCACGAAGCTGCCGTCCCTCCCCTTGCTGTTTCTAGTTCTAGACCTGAAAAGAGGGATTCCAGAGTTTCTACA…
ENSMUSG00000008429	Herpud2	-0.2527425778940403	HERPUD family member 2 [Source:MGI Symbol;Acc:MGI:1915393]	ATGGACCAAAGTGGGATGGAGATTCCTGTGACTCTCATCATTAAAGCACCGAATCAGAAATACAGTGACCAGACTATTAGCTGCTTCTTGAACTGGACCGTGGGGAAACTAAAAACGCATCTATCTAACGTGTACCCTAGCAAACCATTGACAAAGGACCAGAGGTTGGTGTATTCTGGCAGACTGCTTCCTGACCATCTGCAGCTGAAAGACATCCTCAGAAAACAAGATGAGTATCATATGGTTCATCTAGTCTGTGCTTCTCGGAGTCCTCCCAGTTCTCCAAAATCCAGCACCGATAGAGGAAGTCACGAAGCACTGGCATCCAGCACCAGCTCTAATTCAGACCATTCGGATTCAACAACTCCATCACCCAGTCAGGAGAGTTTGTCATTAGTT…
ENSMUSG00000026792	Lrsam1	-0.25707962258794537	leucine rich repeat and sterile alpha motif containing 1 [Source:MGI Symbol;Acc:MGI:2684789]	ATGCCCCTCTTCTTTCGGAAGCGGAAACCCAGTGAGGAGGCTCGAAAACGCCTGGAGTACCAGATGTGTCTGGCAAAAGAAGCTGGGGCAGATGACATTCTCGACATCTCTAAATGTGAGCTCTCTGAGATTCCATTTGGGGCTTTTGCAACGTGCAAAGTTCTACAGAAAAAGGTGTTGATTGTCCATACAAACCACCTCACCTCCCTGCTTCCCAAGTCCTGCAGCCTCTTGAGCCTTGTCACCATCAAGGTTCTGGATCTCCATGAGAACCAGCTGACAGCCCTTCCTGATGACATGGGGCAGCTGACAGTCCTGCAGGTATTGAATGTGGAAAGAAATCAACTCACGCATCTCCCTCGCTCTATTGGGAACCTGCTGCAGCTCCAGACGCTCAAT…
ENSMUSG00000032571	Pik3r4	-7.575709980095248e-4	phosphoinositide-3-kinase regulatory subunit 4 [Source:MGI Symbol;Acc:MGI:1922919]	ATGGGAAATCAGCTGGCTGGCATCGCTCCTTCCCAGATCCTGTCTGTAGAGAGTTATTTCTCAGACATCCATGACTTTGAGTATGATAAGAGCCTGGGAAGCACTCGGTTTTTTAAAGTCGCTCGAGCCAAGCACCGGGAAGGCCTGGTGGTTGTGAAGGTCTTTGCAATTCAGGATCCCACGTTACCCTTAACTAGTTATAAACAGGAGCTGGAGGAACTGAAAATCAGGCTCCACTCCGCCCAGAACTGCCTCCCCTTCCAGAAAGCAGCAGAAAAGGCGTCTGAGAAAGCAGCCATGCTGTTCCGGCAGTATGTGAGAGACAACCTCTACGATCGCATCAGTACCCGCCCGTTCCTAAACAACATCGAGAAGCGCTGGATCGCCTTCCAGATCCTG…
ENSMUSG00000022311	Csmd3	-0.3087839790239292	CUB and Sushi multiple domains 3 [Source:MGI Symbol;Acc:MGI:2386403]	ATGAAAGGGAGCCGCAAAGGAGAAAGCAGAGCAAAGGAATCCAAACCCCGGGAGCCTGGCACGCGAAGATGCGCTAAATGTGGCCGCCTAGACTTCATCCTGAAGAAGAAAATGGGGATTAAAAGTGGATTTACGTTTTGGAACCTCGTCTTTTTATTGACGCTGTCTTGTGTAAAAGGATTTATTTATACATGTGGTGGAACTTTAAAAGGACTCAATGGCACCATAGAAAGCCCTGGTTTTCCATATGGATATCCAAATGGTGCGAACTGTACATGGGTAATAATAGCAGAAGAACGAAATAGAATACAAATTGTTTTTCAGTCGTTTGCACTAGAAGAGGAGTACGACTACTTATCTTTGTATGATGGACATCCTCATCCGACGAACTTTAGGACA…
ENSMUSG00000018169	Mfng	-0.140066924308719	MFNG O-fucosylpeptide 3-beta-N-acetylglucosaminyltransferase [Source:MGI Symbol;Acc:MGI:1095404]	ATGCACTGCCGACTTTTTCGGGGCATGGCGGGAGCCCTCTTTACCCTCCTGTGCGTGGGGCTCCTGTCTCTACGATACCACTCAAGTTTGTCCCAGAGGATGATACAGGGCGCGCTCAGGCTGAACCAACGGAACCCAGGACCCCTGGAGCTGCAGCTAGGCGACATCTTCATCGCAGTCAAGACTACCTGGGCCTTCCATCGCTCCCGCCTGGACCTGCTACTAGACACGTGGGTCTCCAGGATCAGGCAACAGACATTCATCTTCACTGACAGCCCAGATGAACGCCTCCAGGAGAGACTAGGCCCGCACCTCGTGGTCACCAACTGTTCTGCAGAGCACAGTCATCCTGCTCTGTCCTGCAAGATGGCTGCAGAGTTCGATGCCTTCTTGGTCAGT…
ENSMUSG00000027298	Tyro3	-8.012587783420046e-4	TYRO3 protein tyrosine kinase 3 [Source:MGI Symbol;Acc:MGI:104294]	ATGGCGCTGAGGCGGAGCATGGGGTGGCCGGGGCTCCGGCCGCTGCTGCTGGCGGGACTGGCTTCTCTGCTGCTCCCCGGGTCTGCGGCCGCAGGCCTGAAGCTCATGGGCGCCCCAGTGAAGATGACCGTGTCTCAGGGGCAGCCAGTGAAGCTCAACTGCAGCGTGGAGGGGATGGAGGACCCTGACATCCACTGGATGAAGGATGGCACCGTGGTCCAGAATGCAAGCCAGGTGTCCATCTCCATCAGCGAGCACAGCTGGATTGGCTTACTCAGCCTAAAGTCAGTGGAACGGTCTGATGCTGGCCTGTACTGGTGCCAGGTGAAGGATGGGGAGGAAACCAAGATTTCTCAGTCAGTATGGCTCACTGTCGAAGGTGTGCCATTCTTCACAGTG…
ENSMUSG00000039834	Zfp335	-0.6164696094490573	zinc finger protein 335 [Source:MGI Symbol;Acc:MGI:2682313]	ATGGAGGAGAACGAGGTGGAGAGCAGTAGCGACGCGGCCCCTCGGCCCGGCCAGCCTGAGGAGCCTTCTGAGAGCGGCCTGGGTGTGTGCACCTCGGAAGCTGTGTCCGCGGACAGCAGCGACGCTGCGACCGTCCCAGGATTAACGGAGGCTGACGACTCTGGCGTCGGGCAGAGCTCGGACGGTGGCAACCACTCTGTGGAGGAGGTATCTGAGAGCATCTCAACAGACCCTTTGCCTCATGGCTGCCTCCCTGATTCATCTTCTGTGTCCCGGGGACCAGTAGCAGAGATGCCTGGTGGCCCCCCAGCTCTGGTGCATTCCAGTGTTCTCCCAGACCCCAGCATGCTGGTGTCTGACTGCACAGCCTCCTCTTCAGACCTAGGCTCTGCCATTGAC…
ENSMUSG00000057074	Ces1g	0.18769771642696556	carboxylesterase 1G [Source:MGI Symbol;Acc:MGI:88378]	ATGTGGCTCTGTGCTTTGAGTCTGATCTCTCTCACTGCTTGCTTGAGTCTGGGACACCCATCCTTACCGCCTGTGGTACACACCGTTCATGGCAAAGTCCTGGGGAAGTATGTCACCTTAGAAGGATTCTCACAGCCTGTGGCCGTCTTCCTGGGAGTCCCCTTTGCCAAGCCCCCTCTTGGATCTCTGAGGTTTGCTCCACCAGAGCCTGCAGAGCCCTGGAGCTTCGTGAAGCACACCACTTCCTACCCTCCTTTGTGCTACCAAAACCCAGAGGCAGCATTGAGGCTCGCTGAGCTCTTCACCAACCAAAGGAAGATCATTCCCCACAAATTTTCTGAGGACTGTCTCTACCTCAACATTTATACTCCTGCTGACTTAACACAGAACAGCAGGTTG…
ENSMUSG00000021806	Nid2	-0.21442946344885758	nidogen 2 [Source:MGI Symbol;Acc:MGI:1298229]	ATGTTTCGGGACCCGACAGCCGGGTGGCTAACACCGCCATCACCGCTATCGCTGCTGGTGATGCTGTTGCTGCTGTCGCGAGTCGGGGCTCTGCGTCCCGACGAGCTCTTTCCTTACGGGGAGTCGTGGGGAGACCAGCTGCTGCCGGAGGGCGACGACGAAAGCTCAGCAGCTGTGAAGCTGGCAATACCCCTGCGTTTCTACGATGCCCAGTTCAGCAGCCTCTACGTGGGCACCAACGGCATCATCTCCACCCAGGACTTCCCCAGGGAGACTCAATATGTAGATGATGATTTTCCTACTGACTTCCCAGCCATCGCCCCTTTCCTGGCTGACATCGACACTAGTCACAGCAGGGGCCGGATCCTGTACCGCGAGGACACCTCCGGAGCTGTGCTG…
ENSMUSG00000026469	Xpr1	0.2245235891104236	xenotropic and polytropic retrovirus receptor 1 [Source:MGI Symbol;Acc:MGI:97932]	ATGAAGTTCGCCGAGCACCTCTCCGCGCACATCACTCCCGAGTGGAGGAAGCAGTACATCCAGTATGAGGCATTCAAGGATATGCTGTATTCAGCTCAGGACCAGGCACCTTCAGTTGAAGTTACAGATGAGGATACAGTTAAGAGATATTTTGCCAAGTTTGAAGAAAAGTTTTTCCAAACCTGTGAAAAGGAACTTGCCAAAATCAACACATTTTATTCAGAGAAGCTGGCAGAGGCTCAGCGCAGGTTTGCTACACTTCAGAATGAGCTTCAGTCATCGCTGGATGTGCAGAAAGAAAGCAGTGGTGTCACGACATTGCGACAGCGCAGAAAGCCAGTGTTCCACCTGTCCCACGAGGAGCGTGTCCAACATAGGAACATTAAAGACCTTAAGCTG…
ENSMUSG00000028012	Rrh	0.11703600507976467	retinal pigment epithelium derived rhodopsin homolog [Source:MGI Symbol;Acc:MGI:1097709]	ATGCTGAGTGAGGCTTCGGATTTTAACAGCTCGGGCTCTAGGAGCGAAGGTTCTGTCTTTTCAAGGACTGAGCACAGCGTCATAGCGGCTTACCTGATTGTGGCAGGTATCACGAGCATTCTCAGCAACGTAGTAGTCCTGGGTATCTTCATCAAGTACAAGGAGCTGCGGACACCCACCAATGCAGTGATTATCAACCTGGCTTTCACGGATATAGGGGTCAGTAGCATCGGCTATCCCATGTCTGCGGCTTCAGATCTGCATGGAAGTTGGAAATTTGGACATGCAGGCTGTCAGTTCCAGGGAAGAAACGACAGGCAGGTGACTGGGTGCCTGTATACATGTCTTGTACCGCATGTATGCAATGCTGGTGGAGCCAAGAGGAGGGCAGTGGATCTC…
ENSMUSG00000028369	Svep1	-0.3263960152228279	sushi, von Willebrand factor type A, EGF and pentraxin domain containing 1 [Source:MGI Symbol;Acc:MGI:1928849]	ATGTGGTCGCGCCTGGCCTTTTGTTGCTGGGCTCTGGCACTGGTGTCAGGCTGGACCAACTTCCAGCCCGTGGCCCCTTCGCTCAACTTCAGCTTCCGCCTGTTCCCCGAGGCCTCTCCGGGGGCTCTGGGCAGACTGGCGGTACCTCCCGCGTCCAGTGAGGAGGAGGCAGCAGGGAGCAAAGTGGAGCGCCTGGGCCGCGCGTTCCGGAGCCGCGTGCGGCGACTGCGGGAGCTCAGCGGCAGCCTGGAGCTCGTCTTCCTGGTGGACGAGTCGTCCAGCGTGGGCCAAACCAACTTCCTCAACGAGCTCAAGTTCGTGCGCAAGCTGCTGTCCGACTTCCCCGTGGTGTCCACGGCCACGCGTGTGGCCATCGTCACCTTCTCATCCAAGAACAAC…
ENSMUSG00000040428	Plekha4	-0.5006129061644694	pleckstrin homology domain containing, family A (phosphoinositide binding specific) member 4 [Source:MGI Symbol;Acc:MGI:1916467]	ATGGAGCAGGGCCGACCCCGGAGCAGCCTCAGCCTGGCCAGCAGTGCTTCCACCGTCTCCTCTCTGAGTAGCCTGAGCACCAAGAAGCCTACCCGTGCAGTACACAAGGTCCATGCCTTTGGAAAAAGGAACAATGCACTTCGACGAGACCCCAACTTGCCGGTGCACATCCGTGGCTGGCTGCACAAACAGGACAGCTCAGGCCTCCGGCTGTGGAAGCGCCGTTGGTTCGTCCTTTCAGGCCATTGCCTCTTCTACTATAAGGATAGCAGAGAAGAGAGTGTCCTGGGCAGTGTATTATTACCCAGCTACAGTGTCAGGCCAGATGGGCCCGGAGCCCCTCGTGGCCGGCGATTCACCTTCACAGCAGAGCACCCGGGCATGAGGACCTATGTCCTT…
ENSMUSG00000025082	Vwa2	-0.17920320320689384	von Willebrand factor A domain containing 2 [Source:MGI Symbol;Acc:MGI:2684334]	ATGCCTCCACTTCTGCTTCTACCAGCCATCTACATGCTCCTGTTCTTCAGAGTGTCCCCGACCATCTCTCTTCAGGAAGTGCATGTGAACCGGGAGACCATGGGGAAGATCGCTGTGGCCAGCAAATTAATGTGGTGCTCAGCCGCGGTCGACATCCTGTTTCTGTTAGATGGCTCTCACAGCATCGGGAAGGGGAGCTTCGAGAGGTCCAAGCGCTTCGCCATCGCTGCCTGTGATGCCCTGGACATCAGCCCTGGCAGGGTCAGAGTCGGAGCCTTGCAGTTTGGTTCCACTCCTCATCTGGAATTCCCCTTGGACTCCTTCTCAACTCGACAGGAAGTGAAGGAAAGCATCAAGGGGATAGTTTTCAAAGGTGGGCGCACCGAGACGGGCCTAGCC…
ENSMUSG00000115022	Gm49387	0.554816727789125	predicted gene, 49387 [Source:MGI Symbol;Acc:MGI:6121612]	ATGCCAGAAAGTAACTCCGCAGAGGGTAGCGACAGAAGCGAGGAGCAGGTGTCTGGTGCTAAAGTCATCGCCCAGGCTCTAAAAACTCAAGATGTGGAGTACATGTTCGGTGTCGTAGGCATCCCCGTGACCGAAATCGCCCTTGCTGCCCAGGAACTGGGCATCAAGTACATTGGGATGCGGAATGAGCAAGCGGCTTGTTATGCTGCCTCTGCAGTTGGATACCTGACAGGCAGGCCAGGAGTGTGCCTTGTTGTTTCTGGTCCCGGTCTCATCCACGCCTTGGGCGGCATGGCAAATGCAAACATGAACTGTTGGCCCTTGATTGTGATTGGTGGTTCTTCTGAAAGAAATCAAGAAGCTATGGGAGCCTTCCAGGAGTTTCCACAGATACAAGGA…
ENSMUSG00000028641	P3h1	0.014936695775338207	prolyl 3-hydroxylase 1 [Source:MGI Symbol;Acc:MGI:1888921]	ATGGCGGTGAGCGAAAGGAGGCTGCTGGCAGCGATGCTAGCGGTCGCCGCCGCCGCCGCCTTACGGGTTGCGGCGGAGTCTGAGCCGGGATGGGACGTGGCAGCCCCTGACCTGCTTTACGCAGAGGGGACCGCGGCCTACTCGCGCGGGGACTGGCCCGGGGTGGTCCTGAACATGGAGCGGGCGCTGCGCTCGCGGGCGGCCCTGCGTGCCCTCCGCCTGCGCTGCCGCACACGCTGTGCCACCGAACTGCCGTGGGCACCGGACCTGGATCTCGGTCCGGACCCCAGCCTGAGCCAGGACCCGGGCGCCGCCGCCCTGCACGACCTGCGCTTCTTCGGAGCCGTGCTGCGCCGTGCCGCCTGCCTACGCCGCTGCCTCGGGCCGCCCTCTGCCCAC…
ENSMUSG00000057606	Colq	0.14104730688816672	collagen-like tail subunit (single strand of homotrimer) of asymmetric acetylcholinesterase [Source:MGI Symbol;Acc:MGI:1338761]	ATGGTGGTCCTGAATCCAATGACTTTGGGAATTTATCTCCAACTCTTCTTCTGCTCCATCGTGTCTCAGCCAACTTTCATCAACAGTGTGGTCCCAATCTCAGCAGCCCTTCCTGGCCTGGATCAGAAGAAGCGGGGCAGCCACAAAGCATGCTGCCTACTCATGCCCCCACCGCCCCCACTCTTCCCACCGCCGTTCTTCAGAGGCAGCCGGAGCCCGCTTCTCTCCCCAGACATGAAGAACCTTCTGGAACTTGAGGCGTCACCATCACCCTGCATTCAAGGCTCGCTCGGCTCTCCTGGGCCCCCTGGGCCCCAGGGTCCACCTGGGCTTCCTGGCAAGACAGGACCAAAGGGAGAAAAGGGGGACCTTGGCCGCCCAGGAAGGAAGGGTAGACCT…
ENSMUSG00000040284	Gzmg	0.7933974072582334	granzyme G [Source:MGI Symbol;Acc:MGI:109253]	ATGCCACCAATCCTGATTCTCCTGACCCTACTTCTGCCTCTCAGAGCTGGAGCAGAGGAGATCATCGGCGGCCATGAGGTGAAGCCACACTCCCGCCCCTACATGGCGTTCATTAAGTCTGTGGATATCGAAGGGAAGAAGAAATACTGCGGAGGCTTCTTGGTTCAAGATGATTTTGTGCTGACGGCTGCTCACTGCAGAAACAGGTCAATGACAGTCACACTGGGGGCCCACAACATCAAGGCTAAGGAGGAGACACAGCAGATCATCCCTGTGGCAAAAGCCATTCCCCATCCAGCTTTTAATAGAAAGCATGGCACCAATGACATTATGTTATTAAAACTGGAGAGTAAGGCCAAGAGAACTAAAGCTGTGAGGCCCCTCAAGTTGCCCAGACCC…
ENSMUSG00000060188	Cxcl17	-0.21839666807121824	chemokine (C-X-C motif) ligand 17 [Source:MGI Symbol;Acc:MGI:2387642]	ATGAAGCTTCTAGCCTCTCCCTTCCTTCTGTTGCTTCCAGTGATGCTCATGTCCATGGTCTTCAGCAGCCCGAACCCAGGGGTCGCCAGAAGCCACGGGGACCAACACCTGGCTCCTAGGAGGTGGCTCTTGGAAGGTGGCCAAGAATGTGAATGCAAAGATTGGTTCCTGCAAGCCCCAAAGAGAAAAGCCACAGCAGTGCTGGGGCCACCAAGGAAGCAGTGTCCCTGTGATCACGTCAAGGGCAGGGAGAAAAAAAACAGGACACCAAAAGCACCACAGGAAGTCGCAAAGACCCTCCAGAGCCTGCCAGCAATTTCTCAAACGATGTCACCTGGCAAGCTTTGCGCTGCCCTTATAGTACTGAGACTCTGCTCCTCTAGTTAG
ENSMUSG00000027716	Trpc3	-0.08540994538985211	transient receptor potential cation channel, subfamily C, member 3 [Source:MGI Symbol;Acc:MGI:109526]	ATGTCCACCAAGGTCAAGAAGTGCCGGGAGCCCGCGAGGGTGACCTTGCCCGCTCCGGAGGAGGAGGAGGATGGCGAGGCCGAGGGAGGCGAGTCGCAGCGCCGCCGCCGGGGCTGGAGGGGCGTCAACGGCGGGCTGGAGCCGCCCTGCCCGCGCGCGCCGCCGTCCCCGGGGCCCGACGCGTCGTCGGAGGGCAGCCCATCCAGGTGGCGCACTGCGGGGATGCGTGACAAGGGCCGGCGCCAGGCAGTGCGTGGCCCGGCCTTCATGTTCGGTGCTCGTGGGCCCAGCCTCACAGCTGAGGAGGAGCGCTTCCTGGATGCTGCGGAGTACGGCAACATCCCTGTGGTGCGCAAGATGCTGGAGGAGTCTCGCACGCTCAATGTCAACTGCGTGGAC…
ENSMUSG00000026622	Nek2	-0.347640937668935	NIMA (never in mitosis gene a)-related expressed kinase 2 [Source:MGI Symbol;Acc:MGI:109359]	ATGCCGTCCCGGGTGGAGGACTACGAGGTGCTGCACAGCATCGGCACCGGCTCCTACGGCCGCTGTCAGAAGATTCGGAGGAAGAGCGACGGCAAGATCCTGGTGTGGAAAGAGCTTGACTATGGCTCCATGACGGAGGTGGAGAAGCAGATGCTTGTGTCTGAAGTGAACTTGCTTCGGGAGCTGAAACATCCAAACATCGTCAGTTACTATGATCGCATTATTGACCGAACCAACACAACCCTGTACATCGTAATGGAATACTGTGAGGGAGGGGACCTGGCTAGTGTCATTTCAAAGGGGACCAAGGATAGACAGTACTTGGAGGAAGAGTTTGTCCTTCGAGTGATGACTCAGTTGACGCTGGCCCTGAAAGAGTGTCACAGAAGGAGCGATGGT…
ENSMUSG00000074272	Ceacam1	-0.1791883435696154	carcinoembryonic antigen-related cell adhesion molecule 1 [Source:MGI Symbol;Acc:MGI:1347245]	ATGGAGCTGGCCTCAGCACATCTCCACAAAGGGCAGGTTCCCTGGGGAGGACTACTGCTCACAGCCTCACTTTTAGCCTCCTGGAGCCCTGCCACCACTGCTGAAGTCACCATTGAGGCTGTGCCGCCCCAGGTTGCTGAAGACAACAATGTTCTTCTACTTGTTCACAATCTGCCCCTGGCGCTTGGAGCCTTTGCCTGGTACAAGGGAAACACTACGGCTATAGACAAAGAAATTGCACGATTTGTACCAAATAGTAATATGAATTTCACGGGGCAAGCATACAGCGGCAGAGAGATAATATACAGCAATGGATCCCTGCTCTTCCAAATGATCACCATGAAGGATATGGGAGTCTACACACTAGATATGACAGATGAAAACTATCGTCGTACTCAG…
ENSMUSG00000022496	Tnfrsf17	-0.34330966442746325	tumor necrosis factor receptor superfamily, member 17 [Source:MGI Symbol;Acc:MGI:1343050]	ATGGCGCAACAGTGTTTCCACAGTGAATATTTTGACAGTCTGCTGCATGCTTGCAAACCGTGTCACTTGCGATGTTCCAACCCTCCTGCAACCTGTCAGCCTTACTGTGATCCAAGCGTGACCAGTTCAGTGAAAGGGACGTACACGGTGCTCTGGATCTTCTTGGGGCTGACCTTGGTCCTCTCTTTGGCACTTTTCACAATCTCATTCTTGCTGAGGAAGATGAACCCCGAGGCCCTGAAGGACGAGCCTCAAAGCCCAGGTCAGCTTGACGGATCGGCTCAGCTGGACAAGGCCGACACCGAGCTGACTAGGATCAGGGCTGGTGACGACAGGATCTTTCCCCGAAGCCTGGAGTATACAGTGGAAGAGTGCACCTGTGAGGACTGTGTCAAGAGC…
ENSMUSG00000058729	Lin9	-0.3965426617067912	lin-9 homolog (C. elegans) [Source:MGI Symbol;Acc:MGI:1919818]	ATGCACCGGGGCGGGCAGCCTTTGAAAAAGCGGCGCGGCTCGTTCAAGATGGCGGAGCTCGACCAGTTGCCTGACGAGAGCTCTTCAGCAAAAGCCCTTGTCAGTTTAAAAGAGGGAAGTTTATCTAACACATGGAATGAAAAGTACAGTTCTTTACAGAAAACTCCTGTTTGGAAAGGCAGGAATGCGGGCCCTGCTGTAGAAATGCCTTTCAGAAATTCAAAAAGAAGTCGACTCTTTTCTGATGAAGATGACAGACAAATAAATACAAAGTCACCTAAAAGAAACCAGAGAGTGGCAATGATCCCACAGAAATTTACAGCAACGATGTCAACACCAGATAAGAAAGCATCACAGAAGATTGGTTTTCGATTACGGAACCTACTCAAGCTTCCCAAA…
ENSMUSG00000091239	Vmn2r76	-0.227941962890415	vomeronasal 2, receptor 76 [Source:MGI Symbol;Acc:MGI:3761332]	ATGATAGACATGTTCTCCTTCATTTCTGTCTTCTTGGTCTTAAAGGCTTCCATGCTTTTCTGCTCTTTGAATGAACCCAAGTGCTTTTTGAGAATAAAAGACAAGAAAAACAAGGATGGCGATAAGGAAGTTGATTGCTTTTTTTCCATTTATACTAAGCATGGACATATGAAGAATGAACATTTTAGTGGAAATCTAGACAAGCAGTTGACAACTAAGAACATCCACTTGATTTTATCACTTTATTTTGCTATTGAAGAAATCAATATGAGCCCCCATCTATTACCTAATATTTCTCTATTAGTTAAAGTTGAGTGTAAGTTATTGGCTGATGGGAGTAAAGTCAGTTTATCCTCAAGAAGAGGTGATTATTTTCCTAACTACAACTGTGGAAACCAC…
ENSMUSG00000092080	Vmn2r16	-0.09542910542158597	vomeronasal 2, receptor 16 [Source:MGI Symbol;Acc:MGI:3647194]	ATGAAGAAGCTGCATGCTTTCACTATTTCCTTCTCACTCCTGAAGTTTTCTCTCATCTTGTACAGTTTGACTGAACCCAATTGCTTTTGGAGGATACAGAGTAATGAAGATAATGATGGAGATTTGCGAAGTGACTGCGGTTTTGTTCTTTTCACATACGAGGGACCTATAGAAGAAAAGTTTTATAATAATGTTATCCATTTTAGTGGAACAATGAATAATTTGGACTTAATCTGGAATGCACAACAATCCAGAAATGGAGGGCACACTTGTGATCCAGATCTTGAGGATGGAAGATCCAGTCTTTTAATCTGGATGTTGAAGAATAGTGGCCATGAAAAGCATAGAATACCAGCAAGAAGATATGAGTTTCTTTTGGTAATGTATTTTGCTACTGAT…
ENSMUSG00000018362	Kpna2	0.19859503880004506	karyopherin (importin) alpha 2 [Source:MGI Symbol;Acc:MGI:103561]	ATGTCCACGAACGAGAATGCTAACTTACCAGCTGCCCGACTTAACAGGTTCAAGAACAAGGGGAAGGACAGCACAGAAATGCGTCGCCGCCGAATAGAAGTTAATGTGGAACTCAGGAAAGCTAAAAAAGATGAGCAGATGCTGAAAAGAAGAAACGTCAGCTCCTTTCCTGATGATGCTACTTCTCCGCTACAGGAAAACCGGAACAACCAGGGTACTGTAAATTGGTCTGTTGAGGACATTGTTAAAGGCATAAACAGTAACAATTTGGAAAGCCAGCTCCAAGCTACTCAAGCTGCTCGGAAATTGCTTTCTAGAGAGAAACAGCCTCCTATAGACAACATCATCCGGGCTGGTTTGATCCCAAAATTTGTGTCCTTCTTGGGCAAAACTGATTGT…
ENSMUSG00000078901	Gm14440	0.5609682255605332	predicted gene 14440 [Source:MGI Symbol;Acc:MGI:3702430]	ATGGATTTACTCACCTATGATGACGTGCATGTGAACTTCACTCAGGAAGAGTGGGCTTTGCTGGATGCTTCTCAGAAGAGTCTCTACAAAGGTGTGATGGTAGAGACCTATAGGAATCTCACAGCTATAGGTTACAGTTGGGAAGAACATACAATTGAAGACCATTTCCAAACTTCTAGAAGTCATGGAAGGTAA
ENSMUSG00000021621	Zcchc9	-0.265524898073359	zinc finger, CCHC domain containing 9 [Source:MGI Symbol;Acc:MGI:1916335]	ATGACCAGGTGGGCTAGAGTTACTACTTCAAATAGTAAGCGACCCCTGTCAGCAACATCATGGGAGGACATGAAGAAGGGGTCTGTGGAGAGAGCAGACCAAAGCCTTCCAAATCGTAAGCAGTGTCAAAGCAGTAGGCTGCCCCTTAGAAATGACTCACCTCAAGCAAAACGCAAAAAGAACAAAAAGAAAAAAGAGTACTTGAATGAAGACGTGAACGGCTTCATGGAGTACCTGAAGCAGAACTCACAGGTACTTCACAATGGACAGCTGATAGCAGCTGACAGCCAGGAAGTGAGGGAAGAAATTGCCGTGGCCTTAAAGAAGGACAGTCGACGGGAAGGAAGGCGGCTAAAGAGACAGGCGGCAAAGAAGAATGCAATGGTGTGTTTCCATTGT…
ENSMUSG00000057540	Olfr310	-0.42758879438388353	olfactory receptor 310 [Source:MGI Symbol;Acc:MGI:3030144]	ATGGCCAATTCCACCCTAGTGACTGAGTTCTTCCTGGAGGTTTTTGCTGAGATTTGGGAGCTCAGGATCTTAATCACTGTGCTGTTCCTGCTGGTGTATCTGTGCAGCCTGTTAGGGAACCTTACCATCATCATTGTTACTACAGTTGACCAGACCCTGAACACACCCATGTACTTCTTCCTCAGGAATCTGTCCATTTTAGACATGGGCTACATTTCTATCACTGTCCCCAGTACCTGTATCAACTCTCTCACTAACCACAGGAATATGTCTGTGGCTGGGTGTGCAGCACAAATCTTTTCGTTCTTATTTTGTGCATGTGTAGAGATTCTAGTTTTTTCCATCATGGCCCAAGACCGCTATGTGGCCATCTGCAAGCCTCTGCTCTATCCTGTGATC…
ENSMUSG00000094805	Olfr311	0.2046418577860474	olfactory receptor 311 [Source:MGI Symbol;Acc:MGI:3030145]	ATGGCCAATCACACAAGAGTGACTCACTTCATCCTCAGGGGCTTCTCAGATGTCCCACAGCTGAGATTGGTGCTCATCCCATTTTTCTTGCTCTTTTACACTTTCGGCATCCTGGGGAACTTCTCCATCATCACGGCTGTGATAAGAGACAGTCGGCTCCACTCTCCCATGTACTTCTTCCTGAAGAATCTGTCTTTCCTGGACATTTGCTACACCTCAGCCACCATCCCCAAGGCAGTGGTGATATCCCTCACAGGCTCAGGGGTCATCTCCTATCAAGAGTGTGTAGCACAGCTCTACATGTTTATCACACTGTGTGGTACTGAATGCTTTCTGCTCACGGCCATGGCTTATGACCGGTGCCTGGCCATCCTCAGACCACTGATCTATGGAACCATC…
ENSMUSG00000000568	Hnrnpd	0.32057775053288906	heterogeneous nuclear ribonucleoprotein D [Source:MGI Symbol;Acc:MGI:101947]	ATGTCGGAGGAGCAGTTCGGAGGGGACGGGGCGGCGGCGGCGGCAACGGCGGCGGTAGGCGGCTCGGCGGGCGAGCAGGAGGGAGCCATGGTGGCGGCGGCGGCGCAGGGGCCGGCGGCGGCGGCGGGAAGCGGGAGCGGCGGCGGCGGCTCTGCGGCCGGAGGCACCGAAGGAGGCAGCGCCGAGGCAGAGGGAGCCAAGATCGACGCCAGTAAGAACGAGGAGGATGAAGGCCATTCAAACTCCTCCCCACGACACACTGAAGCAGCGGCGGCACAGCGGGAAGAATGGAAAATGTTTATAGGAGGCCTTAGCTGGGACACCACAAAGAAAGATCTGAAGGACTACTTTTCCAAATTTGGTGAAGTTGTAGACTGCACTCTGAAGTTAGATCCTATC…
ENSMUSG00000072778	Vmn2r27	-0.10534744806357707	vomeronasal 2, receptor27 [Source:MGI Symbol;Acc:MGI:3761517]	ATGAAATTACTCATTGCCTTCTCTCTAGTGATTGTTCTCATTTCATTCCAGGAAAAAATGTCTTGTTTCTACATAAGTGTACCTGATTCTCCTGGCTACAATCAAGATGGGGATTTTCTTATTGGAGGATTCTTTTCCCTTAGAGTGACTGGTCGAGAAGACAGAACTGAATTTTGCTTTAATGAGACAATGAATATGACATATGGTAGTTATTTCAATCTACCTAAACATTATCAGCACATATTGGCAATGGTTTTTGCTGTAGAAACAATCAACAAGGACCCAAATATTCTATTCAATATGTCCTTGGGATTTTATCTCTTTGATGTTGACTTTATTGTGATGAAGGCCATGGAAAGTTGTATGGTGTTGATCTCAGGAGAGAGACCACCAATTCCT…
ENSMUSG00000019699	Akt3	0.1592412228121514	thymoma viral proto-oncogene 3 [Source:MGI Symbol;Acc:MGI:1345147]	ATGAGCGATGTTACCATTGTGAAAGAAGGTTGGGTTCAGAAGAGGGGAGAATATATAAAAAACTGGAGGCCAAGATACTTCCTTTTGAAGACAGATGGCTCATTCATAGGCTATAAGGAGAAACCTCAAGATGTGGACTTACCTTATCCCCTCAACAACTTCTCAGTGGCAAAATGTCAGTTAATGAAAACAGAACGACCAAAGCCAAATACATTTATTATCAGATGTCTTCAGTGGACCACTGTTATAGAGAGAACATTTCATGTAGATACACCAGAGGAAAGAGAAGAGTGGACGGAAGCTATCCAAGCCGTAGCCGACCGATTGCAGAGGCAAGAGGAGGAGAGGATGAATTGTAGCCCAACCTCACAGATTGATAATATAGGAGAAGAAGAGATG…
ENSMUSG00000078899	Gm4631	-0.489706192842826	predicted gene 4631 [Source:MGI Symbol;Acc:MGI:3782813]	ATGGATTTAGTCACCTATGATGACGTGCATGTGAACTTCACTCAGGATGAGTGGGCTTTGCTGGATCCTTCTCAGAAGAGTCTCTACAAGGGTGTGATGCTAGAGACCTATAAGAATCTCACAGCTATAGGTTACATTTGGGAAGAACATACGATTGAAGACCATTTTCAAACTTCTAGAAGTCATGGAAGGCATGAAAGAAGTTGTTCTGCAGAGCAACCCTCTGAGTTTATTCAATGTGGTAAAGCCTTTGCATATGAGAGTGGTAGACAAAGGCATCAAATTAAACATAATGGAGAGAAACACCATGACTGTAACCAATGTGGTAAGGACTTTAGAACATGGAATGTCCTGCAAATACATAAGCGAACACATACAGGAGAGAAACCCTATGACTGT…
ENSMUSG00000072915	Gm12258	-1.5934466452532037	predicted gene 12258 [Source:MGI Symbol;Acc:MGI:3651534]	ATGGATACATCTGAGGGGTTGGTGTCATTTGAGGATGTGTCTGTGGACTTCACCTGGGATGAGTGGCAGGACCTGGATGACAGTCAGAGGAAGCTCTACAGGGACGTGATGCTGGAGACCTACAGCAGCCTGCTGTCCTTGAATCAGTGTGATGCCAAACCTGAGTTGATCCTGAAGTTGGAGAAAGAAGCTGAGCCATGGAAGGAAGACGATGCCCCAGACCAGAGCCTCCCAGATATGCAGAATGTGGATGACCGGAATGAGGTCAGTCAAGACAGCCAAAAGATACGCAGATGCAGTCTGGTAATTGCCAAGAGCAGCGTGTCAGCTGAGAGGGCTCCAGCAGGAAAAGCATTGAGTAGCTCACACCGTGTTTTAGATCTGGCCATAAAGAACAGC…
ENSMUSG00000035491	Fthl17a	-0.0458826291201265	ferritin, heavy polypeptide-like 17, member A [Source:MGI Symbol;Acc:MGI:1919246]	ATGGCCGCTTCTGTTCCACAGCTCGAGCAGACTTACCTGTCGGAGTCTAACGCTGCCCTCAACTCACAGATCCAGTTGCAGCTGTATGGCAGTTACATCTACCTCTCCATGGCCTCGTTCTGCAATAAAGAAGAGGTGGCCCTGGGGTCCTTCGCGCTCTTCTTCCTGCGTCAGTCTCAGAAGTGGATGGAACGCACCGAGATGCTCTTCTCCCTGCTGACCGAGCGCCAGGGCTCCCTGACCCTTGGGAGAATTGCCAATCAAGACCGCCAGGACTGGTTGGATGGCCTCATGGCGATGGAGTGCGCGTTCCATCTGGAGAAAACACTCAACCAGAGCCTTCTGCAGCTGTATGGCCTGGCTAACAGCAAAGGTGACCTCTACCTGTGCAACTTCCTG…
ENSMUSG00000032808	Cyp2c38	-0.005575069841927769	cytochrome P450, family 2, subfamily c, polypeptide 38 [Source:MGI Symbol;Acc:MGI:1306819]	ATGGATCTTGTCACATTCCTGGTGCTCACTCTCTCCTCTCTCATTCTCCTCTCACTATGGAGACAGAGGTCTAGAAGAGGGAGGCTCCCTCCTGGCCCCACTCCTTTCCCGATTATTGGTAATTTCCTTCAGATTGATGTGAAGAACTTCAACCAATCCTTAACCAATTTCTCAAAAACCTATGGCCCCGTTTTCACTCTGTATTTGGGCTCACGGCCCATTGTTGTATTGCATGGGTATGAAGCAGTGAAGGAAGCTCTGATTGATCATGGGGAGGAGTTTTCTGGTAGAGAAAACATCCCAATGTCTGAAAAGATTAATAATGGCCTTGGCATTACTTTTAGCAATGGAAACAGTTGGAAAGAGACAAGACGTTTCACACTCATGACCCTAAGGAAT…
ENSMUSG00000078898	Zfp968	-0.7324504083164306	zinc finger protein 968 [Source:MGI Symbol;Acc:MGI:3782903]	ATGCGTGACTCTACTGGGTGTTGTGAGAGGAGGTTAGTCAAGCTCAGAACTCCAAACATGGATTTAGTCACCTATGATGACGTGCATGTGAACTTCACTCAGGAAGAGTGGGCTTTGCTGGATGCTTCTCAGAAGAGTCTCTACAAAGGTGTGATGGTAGAGACCTATAGGAATCTCACAGCTATAGGTTACAGTTGGGAAGAACATACAATTGAAGACCATTTCCAAACTTCTAGAAGTCATGGAAGGCATGAAAGACGTTCTTCTGCAGAGCAACACTCTGAGTTTATTCCATGTGGTAAAGCCTTTGCATATCAGAGTCGTAGTCAAAGGCATGTAAGAATACACAATGGAGAGAAACACTATGAGTGTAACCAATGTGGTAAAGACTTTGGAACA…
ENSMUSG00000035469	Rcbtb1	0.19885264880303247	regulator of chromosome condensation (RCC1) and BTB (POZ) domain containing protein 1 [Source:MGI Symbol;Acc:MGI:1918580]	ATGGTGGATGTAGGAAAGTGGCCAATCTTCACTCTGCTCTCACCCCAGGAAGCTGGATCTATCAGGAAAGCATGTGTCTTTGGTACCTCTGCCAATGAGGCGATCTATGTCACTGACAATGATGAGGTCTTCGTGTTTGGACTGAACTACAGTAACTGTCTAGGAACTGGAGATAACCAGAGCACTCTGGTGCCCAAGAAACTAGAAGCTTTGTGTGGAAAAAAGATCAAAAGTCTTAGTTACGGGAGTGGCCCCCATGTCCTCCTCACCACTGAAGATGGAGTCGTCTATGCCTGGGGCCATAATGGATACAGCCAACTGGGAAATGGGACCACCAACCAAGGCATTGCTCCTGTCCAAGTCTGTACTAATCTCTTGATCAAGCAGGTGATTGAAGTA…
ENSMUSG00000048495	Tyw5	0.03599888923832176	tRNA-yW synthesizing protein 5 [Source:MGI Symbol;Acc:MGI:1915986]	ATGGCTGAGCAGCGTCTTCCGGTACCCCGGCTGCGGGGCGTCTCCCGGGAGCAGTTCATGGAGCATCTTTATCCACAGAGAAAGCCTCTTGTGTTGGAAGGACTCGACTTAGGATCTTGTACAAGCAAATGGACAGTGGATTACCTGAGTCAAGTTGGAGGAACGAAAGAAGTGAAAATTCACGTTGCTGCAGTTCCACAGATGGACTTCATTAGTAAGAATTTTGTCTATAGAACTTTACCTTTTAACAAGTTGGTCCAGAGAGCAGCCGAAGAAACACATAAAGAATTCTTCATTTCAGAGGATGAGAAATACTACTTACGGTCACTTGGAGAAGACCCAAGGAAGGATGTTGCAGACATCAGACAGCAGTTCCCATCATTAGGAGGAGATATTACA…
ENSMUSG00000022108	Itm2b	0.7494495952338242	integral membrane protein 2B [Source:MGI Symbol;Acc:MGI:1309517]	ATGGTGAAGGTGACGTTCAACTCGGCGCTGGCCCAGAAGGAGGCCAAGAAGGACGAGCCCAAGAGCAGCGAGGAGGCGCTCATCGTCCCTCCGGATGCCGTGGCGGTGGATTGCAAGGACCCGGGTGACGTGGTTCCGGTTGGACAGAGGAGAGCGTGGTGTTGGTGCATGTGTTTCGGACTGGCCTTCATGCTTGCTGGCGTCATCCTCGGAGGGGCGTACCTGTACAAGTATTTTGCTCTTCAGCCAGATGATGTGTACTACTGTGGACTAAAGTACATCAAAGATGACGTCATCCTGAACGAGCCTTCTGCGGATGCCCCAGCTGCTCGCTACCAGACAATTGAAGAGAACATTAAGATCTTTGAGGAAGACGCAGTGGAATTCATCAGTGTGCCT…
ENSMUSG00000078695	Cisd3	0.26449268904350465	CDGSH iron sulfur domain 3 [Source:MGI Symbol;Acc:MGI:101788]	ATGGGCTTCCGGCGTCTCTCCTTCCCCACTGATTTTATTTTTCTGTTTCCAAATCATATCTGCCTGCCTGCCTTGTCGAAGCCGTATCAGAGGCGGGAAATCTCTTCTTGGCTGGCCCGATGGTTCCCCAAAGACCCAGCCAAGCCAGTGGTGGCACAGAAGACACCCATCAGATTGGAGCTGGTTGCCGGGAAAACCTACAGGTGGTGTGTATGTGGCCGAAGCAAGAATCAGCCCTTCTGTGATGGCTCCCACTTCTTCCAGCGTACTGGCCTTTCTCCACTCAAGTTCAAGGCCCAAGAGACACGCACAGTGGCCCTATGTACCTGCAAGGCCACTCAGCGGCCCCCTTACTGTGACGGTACCCACAAGAGTGAGCAGGTACAGAAAGCAGAAGTA…
ENSMUSG00000060594	Layn	0.03198921640382216	layilin [Source:MGI Symbol;Acc:MGI:2685357]	ATGCAGCCGGGAGCAGCGCTGCAGGCTATGTTGCTGGCGGTGCTGCTGGCCAAACCGAGGGATTCGAAGGGTCGCCTGCTGAGCGCCTCGGACTTGGACCCCAGAGGAGGGCAGCTGGTCTGCCGAGGAGGAACACGGAGGCCTTGCTATAAAGTCATTTATTTCCATGACGCCTTTCAAAGACTGAACTTTGAGGAAGCCAAAGAAACCTGCATGGAGGATGGGGGACAGCTCGTCAGCATTGAGACAGAGGATGAGCAGAGGTTGATAGAAAAGTTCATTGAAAACCTCCTGGCATCTGATGGTGACTTCTGGATTGGCCTCAAGAGGCTGGAGGAGAAACAGAGCAATAACACAGCCTGCCAGGACCTTTATGCTTGGACAGATGGAAGCACATCA…
ENSMUSG00000071235	Vrtn	-0.2499232777456407	vertebrae development associated [Source:MGI Symbol;Acc:MGI:3588197]	ATGACGTCTCGGGATCAGCTGGTGCAGCAGGTGCTGCGCGACCTGCAGGAGGCAGTGGAGTCCGAGGGCTTAGAGGGTCTCATCGGTGCTGCCCTGGAGGCCAAGCAGGTCCTATCTTCCTTCACCCTTCCCATCTGCCAGAAGGGCGGCCCTGGCGCTCAGGTGCTGGAGGTGGACTCAGTGGCCTTGAGTCTGTACCCGGAGGATGCTCCTCGGAACATGCTGCCCTTGGTGTGCAAGGGTGAGGGGAGCCTGTTGTTTGAAGCGACCAGCCTGTTGTTGTGGGGGCACACGGGTCTCAGCCTGGAGCTGCGAGCCCGCACTGTGGTGGAGATGCTGCTGCACAGGCACTATTATCTGCAGGGCATGATCGACTCCAAGGTGATGCTGCAGGCTGTG…
ENSMUSG00000020491	2810021J22Rik	-1.7276213116328745	RIKEN cDNA 2810021J22 gene [Source:MGI Symbol;Acc:MGI:1917194]	ATGAGCAGTATTGTGGGGTTGGTGTCATTTGAGGATGTGTCTGTGGACTTCACCTGGGATGAGTGGCAGGACCTGGATGACAGTCAGAGGAAGCTCTACAGGGACGTGATGCTGGAGACCTACAGCAGCCTGCTGTCCTTGAATCAGTGTGATGCCAAACCTGAGTTGATCCTGAAGTTGGAGCAAGGAGCTGGGCCATGGAAGGAAGACAATGCCCCAGACCAGAGCCTCCCAGCTCTGCAGCCTATGAAGAGTCTGAAGGAAGCCAGAAGGGACACTGGGAAGAAACATTTGAGCCACCTGCTAGTCACTGGCAGTGCATCAGCTGAGGAGAGGGGCAGACTTGGGGAAATACTTAGTATGAATTCAAACCATGTTTTGCACCTGGCTCTTAAGACT…
ENSMUSG00000021265	Slc25a29	0.08476455471765112	solute carrier family 25 (mitochondrial carrier, palmitoylcarnitine transporter), member 29 [Source:MGI Symbol;Acc:MGI:2444911]	ATGGCGCTCGACTTCCTGGCTGGATGCGCCGGAGGTGTGGCAGGTGTGATCGTGGGACACCCTTTTGACATAGTCAAGGTGCGGCTGCAAGTTCAGAGCACAGAGAAGCCTCAGTACAGAGGGACGCTGCACTGCTTCCAGTCCATCATCAAGCAGGAGAGTGTGCTGGGCCTGTATAAAGGCCTGGGCTCGCCACTAATGGGACTCACCTTCATCAATGCACTGGTGTTTGGGGTGCAAGGTAACACCCTCCGGGCCCTGGGCCAAGACTCACCACTCAATCAGTTCCTGGCCGGTGCAGCAGCAGGCGCCATTCAGTGTGTCATCTGCTGCCCCATGGAACTGGCCAAGACGAGGCTGCAGCTCCAGGCCGTGGGTCCTGCCCGTACCTACAAGGGC…
ENSMUSG00000029649	Pomp	-0.1141542829903531	proteasome maturation protein [Source:MGI Symbol;Acc:MGI:1913787]	ATGAACGCCAGAGGTCTTGGGTCGGAGCTGAAGGACAGTATTCCAGTCGCGGAGCTCTCAGCCAGCGGGCCTTTCGAGAGTCACGATCTTCTCCGGAAAGGGTTTTCTTGTGTGAAAAATGAACTTTTGCCCAGTCACCCTCTCGAGTTATCAGAAAAAAACTTCCAGCTCAACCAGGACAAGATGAACTTTTCCACGCTGAGGAACATCCAGGGTCTGTTTGCTCCCCTGAAGTTACAGATGGAATTCAAGGCAGTGCAGCAGGTTCACCGTCTCCCGTTTCTCCCGAGCTCAAACCTCTCACTGGATATTTTGAGGGGCAACGATGAGACCATTGGTTTTGAGGATATTCTTAATGATCCATCACAAAGTGAACTGATGGGTGAGCCCCACGTGATG…
ENSMUSG00000060012	Kif13b	-0.15920529423890936	kinesin family member 13B [Source:MGI Symbol;Acc:MGI:1098265]	ATGGGAGACTCCAAAGTGAAAGTGGCGGTACGGGTCCGGCCAATGAACCGACGAGAAATTGACTTACATACCAAATGTGTGGTGGATGTTGAAGCGAACAAAGTTATTCTGAATCCTGTAAATACAAATCTTTCCAAAGGAGATGCCCGGGGCCAGCCAAAGATCTTTGCTTATGATCACTGTTTCTGGTCCATGGATGAATCTGTCCGAGAGAAGTATGCAGGTCAAGAAGATGTTTTCAAGTGCCTTGGGGAGAACATTCTTCAGAATGCATTTGATGGCTACAACGCCTGTATCTTTGCTTATGGGCAGACAGGGTCTGGAAAGTCTTACACCATGATGGGCACTGCTGACCAACCTGGATTAATCCCAAGGCTCTGTAGTGGACTCTTTGAACGA…
ENSMUSG00000066500	Izumo2	0.32722436257052623	IZUMO family member 2 [Source:MGI Symbol;Acc:MGI:1922760]	ATGCCTTTGGCCTTGGCCCTGGTGCTTTTGTGTGGCCTGGGCGGCCCCGGGGCATGGGGCTGCCTGCAGTGCGACCAGTCAGTGCTACTGGAGCTCAGGCAGTTGCGTGATGCCATCGTCACCAAGCGCTTCCATCTGGAAGGGCTGCAGGCGCGCGCGCAGGCCCTGCTGTTGAGCATGGAGGGGCCTTTCTTCAGGGACTATGCAATGAACGCTTTCGTGGGGAAAGTGGTCGTGGATCAACTGGAAAAAGTGGCGACATCCTTCAAGAACCAAGCCCAGTATATAAAGGCTAACTCTAAGACAGACGTTCCTCTGCTGGAAGAGCTGGTGAGCTTCAGGGAACATGCCATCAAGGAACTAAAGGGAGCATTAAGAGACTATGAAATGAAAGCCTGT…
ENSMUSG00000071234	Syndig1l	-0.19566716928788672	synapse differentiation inducing 1 like [Source:MGI Symbol;Acc:MGI:2685107]	ATGGAGAGCCTGAGTGAACTACAGAACCCACTGCTGCCTAGAAGCCCCACCCACCTCCACAGACCCTACCCCTACCCGGAGGCCCCGCCCGGCTGGTCCTGCCAGGAGCAGCTTTATTCCTTTCTCCTAGGAGGTGCTGGTCCCGCCCGTGCCCACCAGCTCCTAGACCCAGGGTCCCTGCAACTGGCCGTGGAGGCCTGGTATCGGCCTAGCTGCCTCCTGGGGAGGGACAAGGTCAAAGAGCCCAAAGCAGGCAGCTGTGAGACCAGCTTCACCGAAGCCAGGGAACCTTTAGCGGGACCTGCAGAGGAGGGCTCAGAACCTGGTCAAGCTGCGGAGGACGTAACCATCCACACTGTGTCCTACGGGGTTCAAGAGGAGTTGCAGGGCCAGGAGGAC…
ENSMUSG00000032056	Btg4	-0.2957484295497982	BTG anti-proliferation factor 4 [Source:MGI Symbol;Acc:MGI:1860140]	ATGAGAGACGAAATTGCAACAGCAGTTTTTTTTGTCACAAGATTGGTGAAAAAGCATGAGAAACTGAGTACTCAACAGATAGAAACCTTTGCACTAAAGCTGATGACCATCTTGTTTGAAAAGTACAGAGGTCACTGGCACCCTGACTGCCCTTCCAAGGGGCAGGCTTTTAGGTGTATCAGGATAAACAACAATGAGAATAAAGACCCTGTTTTAGAAAGGGCTTGTGCTGAGAGTAATGTGAATTTTTTTCATCTGGGACTTCCAAAGGAGATGACCATATGGGTCGATCCCTATGAGGTGTGCTGTAGGTATGGTGAGAAAAAGCATCCCTTTACAATTGCTTCTTTTAAAGGTAGATGGGAGAACTGGGAGTTGGCTCAGCATGTCAGCTGTGCA…
ENSMUSG00000016940	Kctd2	-0.1769918531296147	potassium channel tetramerisation domain containing 2 [Source:MGI Symbol;Acc:MGI:1917632]	ATGGCGGAGCTGCAGCTGGACCCGGCAGTGGCGGGGCTGGGAGGGGGTGGCAGCAGTGCGATGGGCGACGGCGGCGGCTCGGGCCGCGGACCCCCCAGCCCTCGCCCTGCGGGCCCGACACCCCGCGGACACGGCCGCCAGCCCGCCGCCGCCGCGCAGCCGCTGGAGCCCGGGCCCGGACCTCCGGAGCGGACGGGAGGCGGCGGGGCCGCCCGCTGGGTCCGGCTCAACGTGGGCGGTACCTACTTCGTGACCACCAGACAGACCCTAGGCCGGGAGCCCAAGTCCTTCCTCTGCCGCCTGTGCTGCCAGGAGGACCCGGAGCTGGACTCCGACAAGGACGAGACTGGAGCGTATCTGATTGACAGAGACCCTACCTACTTTGGTCCTATCCTAAAC…
ENSMUSG00000037001	Zfp39	-1.5856221981540999	zinc finger protein 39 [Source:MGI Symbol;Acc:MGI:99183]	ATGAGGAACTTGCAGCCTGACAGTGTGGAGAACTCCTTGAGTCAACTCCCCAGTCGATGTCTTGAAACTAGAAAGCGTAAGAGAAGCTACAAGAAGAGGCCAGTCACCTACAGTTACTGGAGACGGACCCAGCGGAATAGAGCAAGAAAACACAAGGCACCAGTAAAGGGGTTGGTGTCATTTGAGGATGTGTCTGTGGACTTCACCTGGGATGAGTGGCAGGACCTGGATGACAGTCAGAGGAAGCTCTACAGGGACGTGATGCTGGAGACCTACAGCAGCCTGGAGTCCTTGGGCCACTGCATTACCAAACCTGAGGTGATCTTTAAGCTGGAGCAAGGAGCTGAGCCATGGAGAGCAGAAGACGTCCCAAAGCAGAGCCGAGCAGATGTACAGAAG…
ENSMUSG00000022760	Thap7	-0.3601620370915558	THAP domain containing 7 [Source:MGI Symbol;Acc:MGI:1916259]	ATGCCGCGACACTGCTCCGCCGCCGGCTGCTGCACACGGGATACGCGCGAGACTCGCAACCGCGGCATCTCCTTCCACAGACTTCCCAAGAAAGACAACCCCAGGCGCGGCTTGTGGCTGGCCAACTGTCAGCGGCTGGACCCCAGCGGCCAGGGCCTGTGGGATCCGACCTCTGAGTACATCTACTTCTGCTCCAAACACTTCGAGGAAAACTGCTTTGAGCTGGTGGGAATCAGTGGGTATCACAGGCTGAAGGAGGGGGCAGTCCCCACCATATTTGAGTCTTTCTCCAAGTTGCGTCGAACAGCCAAGACCAAGGGGCATGGTTATCCACCTGGCCTGCCTGACGTCAGCCGGCTCCGGCGATGCAGGAAGCGCTGCTCCGAAAGACAAGGACCC…
ENSMUSG00000078812	Eif5a	0.7745949000584981	eukaryotic translation initiation factor 5A [Source:MGI Symbol;Acc:MGI:106248]	ATGGCAGATGATTTGGACTTCGAGACAGGAGATGCAGGGGCCTCAGCCACCTTCCCAATGCAGTGCTCAGCATTACGTAAGAATGGTTTTGTGGTGCTCAAAGGCCGGCCATGTAAGATCGTCGAGATGTCTACTTCGAAGACTGGCAAGCATGGCCATGCCAAGGTCCATCTGGTTGGCATTGACATTTTTACTGGGAAGAAATATGAAGATATCTGCCCGTCAACTCATAATATGGATGTCCCCAACATCAAACGGAATGACTTCCAGCTGATTGGCATCCAGGATGGGTACCTATCCCTGCTCCAGGACAGTGGGGAGGTACGAGAGGACCTTCGTCTGCCTGAAGGAGACCTTGGCAAGGAGATTGAGCAGAAGTATGACTGTGGAGAAGAGATC…
ENSMUSG00000058600	Rpl30	0.5296447272666319	ribosomal protein L30 [Source:MGI Symbol;Acc:MGI:98037]	ATGGTGGCCGCAAAGAAGACGAAAAAGTCTCTGGAGTCGATCAACTCTAGGCTCCAACTTGTTATGAAAAGTGGGAAGTACGTGCTGGGCTACAAGCAGACTCTGAAGATGATCAGACAAGGCAAAGCGAAGTTGGTTATCCTTGCCAACAACTGTCCAGCTTTGAGGAAATCTGAAATAGAGTACTATGCCATGTTGGCTAAAACTGGGGTCCATCACTACAGTGGCAATAATATTGAACTGGGCACAGCGTGTGGAAAATACTACAGAGTATGCACACTGGCTATCATTGACCCAGGTGATTCTGATATTATTAGAAGCATGCCAGAACAGACTGGTGAGAAGTAA
ENSMUSG00000025003	Cyp2c39	-0.006896018992917783	cytochrome P450, family 2, subfamily c, polypeptide 39 [Source:MGI Symbol;Acc:MGI:1306818]	ATGGACCTTGTCACATTCCTAGTGCTCACTCTCTCTTCTCTCATTCTCCTCTCACTATGGAGACAGAGCTGTGGCAGAGGGAGCCTCCCTCCTGGCCCCACTCCTTTCCCGATTATTGGTAATTTCCTTCAGATAGATATAAAAAACGTCAGCCAATCCTTAACCAATTTCTCAAAAGCCTATGGCCCTGTGTTCACTCTGTATTTGGGCTCACGGCCCACTGTTGTATTACATGGGTATGAAGCAGTGAAGGAAGCTCTGATTGATCATGGGGAGGAGTTTTCTGATAGAGGAAGCATTCCAATGGTAGAAAAGATTAATAACGGCCTTGGCATTGTTTTTAGCAATGGAAACAGATGGAAAGAGATTAGGCGCTTCACACTCACGACCCTGCGAAAT…
ENSMUSG00000064057	Scgb3a1	0.43287265374161976	secretoglobin, family 3A, member 1 [Source:MGI Symbol;Acc:MGI:1915912]	ATGAAGCTTACCACCACCTTTCTAGTGCTCTGTGTGGCTCTGCTCAGTGACTCTGGTGTTGCTTTCTTCATGGACTCATTGGCCAAGCCTGCGGTAGAACCCGTGGCCGCCCTTGCTCCAGCTGCAGAGGCTGTGGCAGGGGCTGTGCCTAGCCTACCATTAAGCCACTTGGCCATCCTGAGGTTCATCCTGGCCAGCATGGGCATCCCATTGGATCCTCTCATAGAGGGATCCAGGAAGTGTGTCACCGAGCTGGGCCCTGAGGCTGTAGGAGCTGTGAAGTCACTGCTGGGGGTCCTGACAATGTTCGGTTGA
ENSMUSG00000090675	Olfr111	0.04114979765341112	olfactory receptor 111 [Source:MGI Symbol;Acc:MGI:2177494]	ATGGAAGGAAAGAATCAAACAGCTCCATCTGAATTCATCATCTTGGGGTTCGACCACCTGAATGAATTGCAGTATTTACTCTTCACCATCTTCTTTCTGACCTACATATGCACTTTAGGAGGCAATGTTTTTATCATTGTGGTGACCATAGCTGATTCCCACCTACACACACCCATGTATTATTTCCTAGGAAATCTTGCCCTTATTGACATCTGCTACACTACTACTAATGTCCCCCAGATGATGGTGCATCTTCTGTCAGAGAAGAAAATCATTTCCTATGGAGGCTGTGTGACCCAGCTCTTTGCATTCATTTTCTTTGTTGGCTCAGAGTGTCTCCTCCTGGCAGCAATGGCATATGATCGATATATTGCTATCTGTAAGCCGTTAAGGTACTCA…
ENSMUSG00000044597	Mycs	-0.3381161860968388	myc-like oncogene, s-myc protein [Source:MGI Symbol;Acc:MGI:1332242]	ATGCTCAGCTGCACTACATCCACCATGCCCGGAATGATCTGCAAGAACTCAGACCTGGAGTTTGACTTGCTGAAACCCTGCTTCTACCCGGAAGAAGATGACATCTACTTTGGTGGTCACAACTCGACGCCTCCAGGGGAGGACATCTGGAAGAAGTTTGAACTGTTGCCCACCCCGCGATTGTCACCTGACAGTGCCTTGGCAGAGCACAGCCTGGAGCCGGTGAACTGGGCCACGGAGATGCTGCTGCCTGAGGCCGACCTATGGAGTAACCCGGGCGAGGAGGAGGTTTTCGGCCAGGGAGGACTCCGCGGCTGCACCAGCAACCCGATCATCCTTCAGGACTGCATGTGGAGCGGCTTCTCCAACCCGGGGAAGCCAGAAAGTGTGGTGAGCGAG…
ENSMUSG00000021807	Rtraf	0.6772115653599621	RNA transcription, translation and transport factor [Source:MGI Symbol;Acc:MGI:1915295]	ATGTTCCGACGCAAGCTCACGGCCCTGGATTACCACAACCCCTCAGGCTTCAACTGCAAAGATGAAACAGAATTTAGAAACTTTATCGTTTGGCTTGAAGACCAGAAAATCAGACACTACAAGATTGAAGACAGAGGTAACTTGAGAAACATCCACAGCAGTGACTGGCCCAAGTTCTTTGAAAAGTATCTCAAAGATGTTAACTGTCCTTTCAAGATTCAGGATCGGCAAGAAGCGATTGACTGGCTTCTTGGTTTAGCTGTTAGACTTGAATATGGAGATAACGCTGAAAAGTACAAGGACTTAGTACCTGATAACAGGAAAAATACTGACAACGCAGCTAAAAATGCAGAGCCACTGATCAACTTGGATGTAAATAATCCTGATTTTAAGGCGGGT…
ENSMUSG00000029650	Slc46a3	-0.057449172593776326	solute carrier family 46, member 3 [Source:MGI Symbol;Acc:MGI:1918956]	ATGAAGATTTCATTCATAGAGCCCGCCATTCTCCTGAACGCGTTTGCTATGACTCTGACCATCCCGCTGACAGCGCAGTACGTGTACCGGAGGATCTGGGAGGAAACCGGTAACTACACCTTTGCTTCCAATAGCAATGGCTCTGAGTGTGACCAAAACAAAAGCAGCTCCATCTTTGCATTCCGGGAGGAAGTTCAGAAAAAGGCATCTCTCTTCAACCTGCAGGTGGAAATGAGTGCCTTAATTCCTGGTCTGGTGTCTACCTTCATGCTTTTAGCGAGCAGCGACAACCACGGACGGAAACTTCCCATGGTCCTGTCATCTCTTGGCTCTCTGGGTACCAACACTTGGCTGTGCATGATGTCCTACTTTGACCTTCCTCTCCAGCTTCTGATAGCA…
ENSMUSG00000033430	Terf2ip	-0.06998751669070699	telomeric repeat binding factor 2, interacting protein [Source:MGI Symbol;Acc:MGI:1929871]	ATGGCGGAGGCGATGGATCTGGGTAAAGACCCCAATGGGCCCACTCACTCCTCCACTCTGTTCGTGAGAGAAGACGGCAGCGCCATGTCGTTTTACGTGCGGCCCAGCTCGGCCAAGCGCCGGCTGTCGACGCTCATCCTGCACGGCGGCGGCACCGTGTGTCGGGTGCAGGAACCCGGAGCCGTGCTTCTCGCCCAGCCCGGGGAGGCGCTGGCCGAGGCTTCGGGCGACTTCATCTCCACGCAGTACATCCTAGACTGCGTGGATCGCAACGAGAAGCTGGACCTGGAGGCCTATCGGCTGGGCCTGACGGAGCAGGCGTCCGATCCGAAGCCCGGGGCTTCCACCGAGGGCTCCACGGAACCGGAGCCGCAGCCCCTGACCGGGCGCATCGCCTAC…
ENSMUSG00000037034	Pax1	-0.20953207552213957	paired box 1 [Source:MGI Symbol;Acc:MGI:97485]	ATGAAGTTCACCTTGGGCCTGGGGTCGCGGGCCTGGAGAGTGTCCTGGGAGCGGGCGGCGGCGGCTGCGGCAGGCCCTGGGGCGGGCGGCGCGCTGGGCAGCGGCTCACTGCGCGTCTCCAGCCGCCGCGGCCCACGGCTCGCGCGCGCCCTCCCTCTATGCCTCTCCGGCGGTGGCGGCGCCCGAGCTCTCCCGGACTGCGCCGGGCCCAGCCCCCGCCGCTCCGGCGCCAGGCAGCTGGCCGGCCCGCGCGCGATGGAGCAGACGTACGGCGAAGTGAACCAACTTGGTGGCGTGTTCGTCAACGGCCGTCCCCTGCCCAATGCCATCCGCCTACGAATCGTGGAGCTAGCACAGCTGGGTATCCGACCCTGTGACATCAGTAGGCAACTGCGGGTC…
ENSMUSG00000060510	Zfp266	-0.8211584254578429	zinc finger protein 266 [Source:MGI Symbol;Acc:MGI:1924769]	ATGGCAGCCATTGATTTGTCCCATGGCCTTCTTTCTAGAGAGCCTATCTACGTCTACGAAGCAAACATAGAGGTAGACGGGACGGTGACTGACAACCAGGCAAATTGTTACCAGGATTCAGTGACCTTCGATGATGTGGCTGTGGAGTTCACCCCGGATGAGTGGACTTTACTGGACCTGACTCAGAAGAATCTATACCGAGAGGTCATGCTGGAGAACTACGAGAACTTGACTTCAGTAGGATGTCAGTTATTCATTCCTAGTCTGACCCCCTGGTTAAAACAAGAAGAGTCCGAGGTGGCGGAAAGTGCTGTTCCTCAACAATTGGAACTACAACCTACAATTGACGATTCAGAGCTTGAGAATTATTTTAGGATGCAAAGTTCCAGTGCAACAGAA…
ENSMUSG00000032057	4833427G06Rik	0.031948466123479596	RIKEN cDNA 4833427G06 gene [Source:MGI Symbol;Acc:MGI:1921013]	ATGGAAACGGGGCCCAGAGGCTGTCCTAGCGGCAGGAAGGAATCCCAGGAAATCTGCTCCCCTGGATTACTGGTGTTCACCGGCTGCTCTGAGCAGGATGCCAATTTGGCTAAGCAGTTTTGGCTCGGGGCGTCCATGTACCCCACTACCGAATCTCAGCTCGTGCTGACCCGAGGCAGCAGTCAGAGGCTACCGGTGGCGCGGAACTCTAAAGTCGTTCTGAGAGAGAAAAGTTCTGTCCAGCCCTTTCCCTTTGATCAGGACAAGGATGCAATTATCTTTGCTAAAGCCCAAAGGATTCAGGAATCTGAAGAGAGAGCAAAGTATCTCCAAAAGGCCAAAACGCGAGATGAGATTCTCCAACTTTTAAGGAAACAAAGAGAAGAAAGGATCTCGAAA…
ENSMUSG00000053907	Mat2a	0.2909255772447239	methionine adenosyltransferase II, alpha [Source:MGI Symbol;Acc:MGI:2443731]	ATGAACGGGCAGCTCAACGGCTTCCACGAGGCGTTCATTGAGGAGGGGACGTTCCTCTTCACTTCCGAGTCTGTAGGGGAAGGTCACCCAGATAAGATTTGTGACCAAATCAGTGATGCTGTCCTTGATGCACACCTTCAACAAGACCCTGATGCTAAAGTGGCTTGTGAAACTGTTGCTAAAACTGGAATGATTCTTCTTGCTGGGGAAATTACATCCAGAGCTGCCATTGATTACCAGAAAGTGGTTCGTGAAGCCATAAAGCACATTGGATATGATGACTCTTCCAAAGGGTTTGACTACAAGACTTGTAATGTGTTGGTTGCCTTGGAACAACAGTCACCAGATATTGCCCAAGGTGTTCATCTTGACCGGAATGAGGAAGATATTGGTGCAGGA…
ENSMUSG00000061887	Ssbp3	-0.19880525966903448	single-stranded DNA binding protein 3 [Source:MGI Symbol;Acc:MGI:1919725]	ATGTTTGCCAAAGGCAAAGGCTCGGCGGTGCCCTCGGACGGGCAGGCTCGGGAAAAGTTAGCTTTATACGTCTACGAATATTTACTGCACGTAGGAGCACAGAAATCTGCACAGACCTTCTTATCAGAGATTCGATGGGAAAAAAACATCACACTGGGTGAACCGCCTGGGTTCCTGCACTCGTGGTGGTGTGTATTTTGGGACCTTTACTGTGCAGCTCCTGAAAGGAGAGACACTTGTGAACATTCAAGTGAAGCAAAAGCCTTTCATGATTATAGTGCAGCAGCTGCCCCAAGCCCTGTGCTTGGCAACATTCCCCCCAATGATGGGATGCCCGGAGGCCCCATCCCGCCAGGTTTCTTTCAGGGTCCTCCGGGGTCACAGCCCTCGCCGCACGCA…
ENSMUSG00000008658	Rbfox1	0.06193371242685766	RNA binding protein, fox-1 homolog (C. elegans) 1 [Source:MGI Symbol;Acc:MGI:1926224]	ATGTTGGCGTCGCAAGGAGTCCTTCTGCATTCTTATGGCGTGCCCATGATTGTGCCTGCTGCCCCCTACTTCCCGGGACTGATGCAGGGTAATCAGGAAGCAGCCGCCGCCCCTGACACAATGGCTCAGCCTTATGCCTCAGCGCAGTTCGCACCACCCCAGAATGGCATCCCTGCAGAATACACGGCCCCTCATCCTCATCCCGCGCCAGAGTACACCGGCCAGACCACTGTCCCTGACCACACATTAAACCTGTATCCTCCTACACAGACGCACTCGGAGCAGAGTGCTGACACCAGTGCGCAGACCGTCTCCGGCACCGCCACACAGACAGATGATGCAGCCCCGACCGACGGCCAGCCCCAGACACAACCTTCTGAAAACACAGAAAGCAAGTCC…
ENSMUSG00000036251	Trpm8	0.2298359074437806	transient receptor potential cation channel, subfamily M, member 8 [Source:MGI Symbol;Acc:MGI:2181435]	ATGTCCTTCGAGGGAGCCAGGCTCAGCATGAGGAGCCGCAGAAATGGTACTATGGGCAGCACCCGGACCCTGTACTCCAGTGTATCTCGGAGCACAGACGTGTCCTACAGTGACAGTGATTTGGTGAATTTTATTCAGGCAAATTTTAAAAAACGAGAATGTGTCTTCTTTACCAGAGACTCCAAGGCCATGGAGAACATATGCAAGTGTGGTTATGCCCAGAGCCAGCACATCGAAGGCACCCAGATCAACCAAAATGAGAAGTGGAACTACAAAAAACATACCAAGGAGTTTCCAACAGACGCCTTCGGGGACATTCAGTTTGAGACTCTGGGGAAGAAAGGCAAGTACTTACGCTTGTCCTGTGACACCGACTCTGAAACTCTCTACGAACTGCTG…
ENSMUSG00000047832	Cdca4	-0.10041566423169365	cell division cycle associated 4 [Source:MGI Symbol;Acc:MGI:1919213]	ATGTTTGCTAGAGGGCTGAAGAGGAAATATGGTGACCAGGAAGAAGGAGTAGAGGGTTTTGGCACTGTCCCTTCCTATAGCCTGCAGCGACAGTCACTCCTGGACATGTCCCTTGTCAAGCTCCAGCTCTGTCACATGCTAGTGGAGCCCAATCTCTGCCGCTCGGTCCTCATCGCCAACACAGTCCGGCAGATCCAGGAGGAAATGAGCCAGGATGGTGTGTGGCATGGGATGGCACCCCAGAATGTAGATCGGGCACCAGTTGAACGCCTGGTGTCCACAGAGATCCTGTGTCGTACAGTGAGGGGAGCTGAGGAAGAGCACCCTGCTCCTGAACTGGAAGATGCTCCCTTGCAAAACTCGGTTTCCGAGCTCCCCATCGTTGGCTCAGCACCAGGG…
ENSMUSG00000032194	Kank2	-0.30641592025551934	KN motif and ankyrin repeat domains 2 [Source:MGI Symbol;Acc:MGI:2384568]	ATGGCCCAGGTCCTGCATGTGCCCGCCCCATTCCCAGGAACCCCTGGTCAGGCCTCCCCAGCGGCCTTCCCCAGCAAGGAGCCAGACCCACCGTACTCAGTGGAAACGCCCTATGGCTACCGCCTGGACCTGGATTTTCTTAAGTACGTGGATGACATTGAGAAGGGCCACACACTGCGCAGGGTGGCGGTACAGCGCCGGCCGCGCCTGGGTTCCCTGCCACGGGGCCCGGGCTCCTGGTGGACGTCCACAGAGTCTCTGTGCTCTGATGCCAGTGGGGACAGCCGGCACTCGGCCTACTCCTACTGTGGCCGCGGCTTCTACCCACAGTACGGAGCCTTGGAGACCCGAATCGGCTCCAACCCTCGTGTGGAGCGCACGCTGCTGGATGCGCGGCGC…
ENSMUSG00000026627	Pacc1	-0.0460241519582186	proton activated chloride channel 1 [Source:MGI Symbol;Acc:MGI:1914200]	ATGATCCGACAAGAACTCTCCACGTCCTACCAGGAGCTCAGCGAGGAGTTGGAGCAGGTGGTTGAGAACTCGGAGCAGGCAGACGAACGAGACAAGGAGCTGGTCCAAGTACAAGGTCCAGGTGTCGTGCCAGGCGTGGACAACGAGTCCGCCTCCAGCAGCATCCGCTTCAGCAAGGCTTGCCTGAAGAATGTCTTCTCGGTCCTGCTCATCCTCATCTACCTGCTGCTCATGGCGGTGGCCGTCTTCCTGGTCTACCAGACCATCACGGACTTCCGGGAAAAGCTCAAGCACCCTGTCATGTCCGTGTCTTACAAGGAGGTGGATCGCTACGACGCTCCAGGGATTGCCTTTTACCCTGGTCAGGCTCAGCTGCTCAGCTGTAAGCACCACTATGAG…
ENSMUSG00000037206	Islr	-0.21263955039219215	immunoglobulin superfamily containing leucine-rich repeat [Source:MGI Symbol;Acc:MGI:1349645]	ATGCGGGCACTGTGCCTGCTTTGTTGGGCTGTTCTCCTGAACCTGGTGCGAGCTTGTCCAGAGCCCTGTGACTGTGGGGAGAAGTATGGCTTCCAGATTGCAGACTGTGCCTATCGTGACCTAGAGGGTGTGCCACCGGGCTTCCCGGCCAATGTGACCACACTGAGCCTGTCAGCCAACAGGCTGCCAGGCCTGCCGGAGGGAGCCTTCAGGGAAGTGCCCCTATTGCAGTCGCTGTGGCTGGCACACAATGAGATCCGCTCGGTGGCTATTGGTGCTCTGGCCCCTCTGAGCCATCTCAAGAGTCTGGACCTCAGCCACAACCTCCTCTCTGAGTTTGCCTGGAGCGACCTGCACAACCTCAGCGCTCTGCAGCTGCTCAAGATGGACAGCAACGAG…
ENSMUSG00000053441	Adamts19	-0.4590520060258124	a disintegrin-like and metallopeptidase (reprolysin type) with thrombospondin type 1 motif, 19 [Source:MGI Symbol;Acc:MGI:2442875]	ATGGGCCCGGAGATGCGCCTGACTCGCATCTGCTGCTGCTGCTGCCTCCTCTACCAGCTAGGCTTCCTGTCGCATGGGACCACCTCAGGGTTGCAGCTCACCCCGGATCTCGAGGAATGGGAAGTCGTGTTTCCTGCACTCTGGCGCCGGGAGTCGCTGAACGCCACGGGCCTCAGCGGGGGCAGCTCAGACCCGGGATCCGGGCGCAGCTCTGGGGGCGGCGGCCGGGGGCAGGCTTCGGGCAGCTCGCGGGAGGTGCGCTCGGTGGCCCGAGCACCGCAGGAAGAAGCCACCAGAGGCCAATCTGAGCCCTGGTTCGGGTCTCCCCTGGAGCCAGGTGCTGAGGACGAGGAGGAACTCGAATCTCAGGAGCTGCCTCGGGGATCCAGCGGAGATACT…
ENSMUSG00000031808	Slc27a1	0.2287340003468115	solute carrier family 27 (fatty acid transporter), member 1 [Source:MGI Symbol;Acc:MGI:1347098]	ATGCGGGCTCCTGGAGCAGGAACAGCCTCTGTGGCCTCACTGGCGCTGCTTTGGTTTCTGGGACTTCCGTGGACCTGGAGCGCGGCGGCGGCGTTCTGTGTGTACGTGGGTGGCGGCGGCTGGCGCTTTCTGCGTATCGTCTGCAAGACGGCGAGGCGAGACCTCTTTGGCCTCTCTGTTCTGATTCGTGTTCGGCTAGAGCTGCGACGACACCGGCGAGCAGGAGACACGATCCCGTGCATCTTCCAGGCTGTGGCCCGGCGACAACCAGAGCGCCTGGCACTGGTGGACGCCAGTAGTGGTATATGCTGGACCTTCGCACAGCTGGACACCTACTCCAATGCTGTAGCCAACCTGTTCCGCCAGCTGGGCTTTGCACCAGGCGATGTGGTGGCTGTG…
ENSMUSG00000007989	Fzd3	-0.6389831368985274	frizzled class receptor 3 [Source:MGI Symbol;Acc:MGI:108476]	ATGGCTGTGAGCTGGATTGTCTTTGATCTTTGGCTCTTGACTGTGTTTCTGGGGCAGATAGGTGGGCACAGTTTGTTTTCTTGTGAACCTATAACCTTGAGGATGTGCCAAGATTTGCCTTACAATACTACCTTCATGCCTAATCTTCTGAACCATTATGACCAACAGACTGCAGCTTTAGCAATGGAGCCCTTCCACCCTATGGTGAACCTGGATTGTTCTCGGGATTTTCGGCCATTTCTTTGTGCACTCTATGCCCCTATTTGTATGGAATATGGACGTGTCACACTTCCCTGCCGTAGGCTGTGTCAGCGTGCCTATAGCGAGTGTTCAAAACTCATGGAGATGTTTGGTGTCCCGTGGCCTGAAGATATGGAGTGCAGTAGGTTTCCAGATTGT…
ENSMUSG00000040843	Tiprl	0.12837580583504052	TIP41, TOR signalling pathway regulator-like (S. cerevisiae) [Source:MGI Symbol;Acc:MGI:1915087]	ATGATGATCCACGGCTTTCAGAGCAGCCACCAGGACTTCTCCTTCGGGCCTTGGAAGCTGACGGCGTCCAAGACCCACATCATGAAGTCTGCGGATGTGGAAAAGTTAGCTGACGAGCTGCACATGCCATCCCTCCCTGAAATGATGTTTGGAGACAACGTTCTAAGGATCCAGCATGGCTCTGGCTTTGGAATAGAGTTCAATGCTACGGACGCACTGAGATGTGTGAACAACTATCAGGGCATGCTCAAAGTAGCTTGTGCTGAAGAGTGGCAGGAAAGTAGGACGGAGGGCGAACACTCCAAAGAAGTTATTAAACCATATGACTGGACCTATACAACAGATTATAAAGGAACGCTGCTTGGAGAATCTCTTAAGTTAAAGGTTGTACCTACAACA…
ENSMUSG00000051243	Islr2	-0.18572553459470117	immunoglobulin superfamily containing leucine-rich repeat 2 [Source:MGI Symbol;Acc:MGI:2444277]	ATGCACTCCCCCTTTCTCCCCACCGCCACAGCAACAGATGCCAGAAGCTCCCTTAGACTGTCACCTGAGTCTGGAGACCGGCTCGCAGCCCCACAGCATCACACTGCAAGTCAGAGAGCAGCAGGAGTCACGATGGGGCCCTTTGGAGCCCTGTGTTTGGCCTGGGCTTTGCTAGGAGTGGTCAGAGCGTGTCCCGAGCCTTGCGCCTGTGTTGACAAGTACGCCCACCAGTTTGCAGACTGTGCCTACAAGGAGCTGCGCGAGGTCCCAGAAGGACTGCCAGCCAACGTGACCACGCTTAGTCTGTCTGCCAACAAGATTACGGTACTAAGGCGGGGGGCCTTCGTCAACGTCACGCAGGTCACTTCGCTGTGGCTGGCTCACAGTGAGGTACGCACG…
ENSMUSG00000038168	P3h2	-0.05780481427355663	prolyl 3-hydroxylase 2 [Source:MGI Symbol;Acc:MGI:2146663]	ATGCGGGAGAGCACGTGGGTGTCGCTGCTGTTGCTGCTACTGCTGCCCACACCGCAGCGGGGCGGCCCCCAGGACGGTCGCCGGTCCCCGGAGCCAGAGCCCGAGCGCGGCCCGCTGCAGCCCTTCGACCTGCTCTACGCCAGCGGCGTGGCTGCCTACTACAGCGGCGACTATGAGCGAGCGGTGCGGGACCTGGAAGCCGCCCTGAGCAGTCACCGGCGCCTACGGGACATCCGCACGCGCTGCGCCCGCCACTGCGCGGCGCGCCGTCCGCTCGCGCCCCCCGGCGCCGGCCCCGGAGCCGAGCTGCCCTTCTTCCGCGCGGTGCTGGAGCGGGCGCGCTGCTCCCGCAGCTGCCAGAGCCAGCGCCTGGGCGGCCCCGCGTCCCGCCACCGCGTC…
ENSMUSG00000074129	Rpl13a	0.4493641771118494	ribosomal protein L13A [Source:MGI Symbol;Acc:MGI:1351455]	ATGGCGGAGGGGCAGGTTCTGGTATTGGATGGCCGAGGCCATCTTCTTGGCCGCCTGGCGGCCATTGTGGCCAAGCAGGTACTTCTGGGCCGGAAGGTGGTGGTCGTACGCTGTGAAGGCATCAACATTTCTGGAAACTTCTACAGAAACAAGTTAAAGTATCTGGCCTTTCTCCGGAAGCGGATGAATACCAACCCCTCCCGAGGCCCCTACCACTTCCGAGCCCCCAGCCGCATTTTCTGGCGCACTGTGCGAGGCATGCTGCCCCACAAGACCAAGAGAGGCCAGGCTGCCCTGGAGCGCCTCAAGGTGTTGGATGGGATCCCTCCACCCTATGACAAGAAAAAGCGGATGGTGGTCCCTGCTGCTCTCAAGGTTGTTCGGCTGAAGCCTACCAGA…
ENSMUSG00000032243	Itga11	-0.10177887767334157	integrin alpha 11 [Source:MGI Symbol;Acc:MGI:2442114]	ATGGACTTTCCCAGGGGCCTCCTGGTGGCCTGGACCCTCAGCCTTTGGCCAGGATTCACGGACACCTTCAATATGGATACCAGAAATCCCCGGGTCATTGCTGGTCCCAGTGCTGCCTTCTTTGGCTACACAGTACAGCAGCATGATATCAGTGGCAAGAAGTGGTTGGTTGTGGGTGCCCCAATGGAAACCAATGGCCATCAGAAGACAGGAGACGTATACAAATGTCCGGTAACCCAGGGCAACTGCACCAAGCTCAACCTGGGCAGGGTCACTCTGTCCAATGTGTCTGAGAGGAAGGACAACATGCGCCTCGGCCTGAGCCTTGCCACCAACCCCAAGGACAACAGCTTCCTGGCCTGCAGCCCTCTCTGGTCGCACGAGTGTGGAAGCTCCTAC…
ENSMUSG00000095814	Btbd35f7	-0.3750679723476481	BTB domain containing 35, family member 7 [Source:MGI Symbol;Acc:MGI:3709265]	ATGGGGCTTTTAGTCAGCAGGGTCTTGAGTTGCAGGGATTCCAGTCTGTTAGAGCCACAGCCAGAAGCCATAGCCGGTGCCAGCTACATTCCTGGCAGTCGCAAGCGAAAAAGAAACAGTTTGGAGGAGTTGGCAACAAGTTCTAATGTTCATGGACCTCAAAACCAGGGAATGTATCCACATCAAGTTCTCAACTACATCTACTGGAAAAGGGTTAAGATCTCATCTAATGATGCTTATCAAAACTTATTTTTGGACGGGCATGATAGCGACATTAAAATCCGTGCTCTGGGAAGAACATGGTGTTTACACAAAGTATTTTTATGTCAGTCAGGCTACTTTGCTAACATTCTCAAAGGTACTTGGAGAGAATCACACCATGGTGTTATAAATCTGATC…
ENSMUSG00000026626	Ppp2r5a	-0.19565852728302166	protein phosphatase 2, regulatory subunit B', alpha [Source:MGI Symbol;Acc:MGI:2388479]	ATGTCGTCGCCGTCGCCGCCCGCACCAGTTGCCTGCGCCGCCATCTCGGCCTCGGAGAAAGTGGACGGCTTCACCCGGAAATCGGTGCGCAAGGCGCAGAGGCAGAAGCGCTCTCAGGGCTCGTCGCAGTTCCGCAGCCAGGGCAGCCAGGCGGAGCTGCACCCCCTGCCCCAGCTCAAAGATGCCACTTCAAATGAACAGCAAGAGCTTTTCTGCCAGAAGCTACAACAGTGCTGTGTACTGTTTGATTTCATGGACTCTGTCTCAGACTTGAAGAGCAAAGAAATTAAAAGAGCGACGCTGAATGAACTGGTTGAGTATGTTTCAACTAATCGTGGTGTAATTGTTGAATCAGCGTATTCTGATATAGTAAAAATGATCAGTGCTAACATCTTCCGG…
ENSMUSG00000090841	Myl6	0.7696044265278411	myosin, light polypeptide 6, alkali, smooth muscle and non-muscle [Source:MGI Symbol;Acc:MGI:109318]	ATGTGTGACTTCACCGAGGACCAGACCGCAGAATTCAAGGAGGCTTTCCAGCTGTTTGACCGAACAGGTGATGGCAAGATCCTGTACAGCCAGTGTGGGGATGTGATGCGGGCCCTGGGCCAGAACCCTACCAACGCCGAGGTGCTCAAGGTCCTAGGGAACCCCAAGAGTGATGAGATGAATGTGAAGGTGCTGGACTTTGAGCACTTCCTGCCCATGCTGCAGACCGTGGCCAAGAACAAGGACCAGGGAACCTACGAGGATTATGTTGAAGGCCTTCGTGTGTTTGACAAGGAAGGAAATGGCACCGTCATGGGTGCTGAAATCCGTCATGTCCTAGTCACACTGGGCGAGAAGATGACAGAGGAAGAAGTAGAGATGCTAGTGGCGGGGCATGAG…
ENSMUSG00000022216	Psme1	0.6170172802564456	proteasome (prosome, macropain) activator subunit 1 (PA28 alpha) [Source:MGI Symbol;Acc:MGI:1096367]	ATGGCCACACTGAGGGTCCATCCCGAAGCCCAAGCCAAGGTGGATGTGTTCCGTGAAGACCTGTGTAGCAAGACAGAGAACCTGCTTGGGAGCTATTTTCCCAAGAAAATCTCAGAGTTGGATGCGTTCTTAAAGGAGCCAGCTCTCAATGAAGCCAACCTGAGCAATCTGAAGGCTCCATTGGACATCCCAGTACCCGATCCAGTCAAAGAGAAAGAGAAGGAGGAGCGGAAGAAGCAACAGGAGAAGGAAGAGAAGGAAGAGAAGAAGAAAGGGGACGAAGACGACAAAGGTCCCCCCTGTGGCCCAGTGAACTGCAATGAGAAGATTGTGGTCCTCCTGCAACGCCTAAAACCTGAGATCAAGGATGTCACTGAGCAACTCAATCTGGTCACTACC…
ENSMUSG00000026020	Nop58	0.2986395273375537	NOP58 ribonucleoprotein [Source:MGI Symbol;Acc:MGI:1933184]	ATGTTGGTCCTGTTTGAAACGTCCGTTGGCTACGCCATCTTTAAGGTTCTGAATGAGAAGAAACTTCAAGAGGTTGATAGTTTGTGGAAAGAATTTGAAACTCCAGAGAAAGCAAATAAAATAGTAAAGCTAAAACATTTTGAGAAATTTCAGGATACAGCAGAAGCATTAGCAGCATTCACAGCTCTGATGGAAGGCAAAATCAATAAACAGCTGAAGAAAGTTTTGAAGAAAATAGTAAAAGAAGCCCATGAACCTCTGGCTGTCGCTGATGCTAAACTAGGAGGGGTAATAAAGGAAAAATTGAATCTCAGCTGTATCCATAGTCCTGTTGTTAATGAACTTATGAGAGGAATCCGATCACAAATGGATGGCTTGATTCCTGGGGTAGAACCACGT…
ENSMUSG00000040616	Tmem51	0.008592116641285143	transmembrane protein 51 [Source:MGI Symbol;Acc:MGI:2384874]	ATGATGGCCCAATCCAAAGCCAACGGCTCACACTACGCACTGACGGCCATCGGCCTGGGGATGCTGGTCCTCGGGGTCATCATGGCCATGTGGAACCTGGTTCCTGGTTTCAGCCCTGCGGATAAGCCAACGTCTCAGGGCAACAAGACAGAGGGAGGTGGTGGCATCCTCAAGAGCAAGACGTTTTCAGTGGCGTACGTGCTGGTCGGGGCTGGCATGATGCTGCTGCTGCTAGCCATCTGCCTGAGCATCCGGGACAAAAGGAGGATGCGGCAGAGTGAGGAGCTGGCTCGAATTCAGCAGCAGGCAGGAACCGTGCCCCACTCCCAAGAAGAAGACAGCCAGGAGGAAGAGGAGGATGTCTCCTCACGGTACTACGTACCGAGCTACGAGGAAGTG…
ENSMUSG00000023034	Nr4a1	-0.3888991436485564	nuclear receptor subfamily 4, group A, member 1 [Source:MGI Symbol;Acc:MGI:1352454]	ATGCCCTGTATTCAAGCTCAATATGGAACACCAGCAACGAGCCCAGGACCGCGTGACCACCTGACCGGTGATCCCCTGGCCCTTGAGTTCGGCAAGCCTACCATGGACCTGGCCAGCCCCGAGACAGCACCTGCCGCACCTGCTACACTGCCCAGCTTCAGCACCTTCATGGACGGGTACACCGGAGAGTTTGACACCTTCCTCTACCAGCTGCCGGGGACGACCCAGCCGTGCTCCTCAGCTTGTTCCTCTGCCTCCTCCACGTCTTCTTCCTCATCCTCGGCCACCTCCCCCGCTTCGGCGTCCTTCAAGTTTGAGGACTTCCAGGTGTACGGCTGCTACCCGGGCACCCTGAGCGGCCCATTAGATGAGACCCTATCCTCCAGCGGCTCTGAGTAC…
ENSMUSG00000026421	Csrp1	0.5720332672793654	cysteine and glycine-rich protein 1 [Source:MGI Symbol;Acc:MGI:88549]	ATGCCAAACTGGGGAGGAGGCAAGAAATGTGGGGTATGCCAGAAGACGGTCTACTTTGCTGAGGAGGTCCAGTGCGAGGGCAACAGCTTCCATAAATCCTGCTTCCTGTGTATGGTCTGCAAGAAGAATCTGGACAGCACCACCGTGGCAGTGCATGGAGAAGAGATCTATTGCAAGTCATGTTACGGCAAGAAGTATGGGCCAAAAGGCTACGGCTACGGGCAGGGCGCAGGCACGCTGAGCACAGACAAGGGGGAGTCTCTGGGCATCAAGCATGAGGAAGCCCCTGGACACAGGCCCACCACCAACCCCAATGCATCCAAGTTTGCCCAGAAGATTGGCGGCTCTGAGCGCTGTCCCCGCTGTAGCCAGGCGGTCTATGCTGCGGAGAAGGTGATC…
ENSMUSG00000025971	Maip1	-0.2130367471662261	matrix AAA peptidase interacting protein 1 [Source:MGI Symbol;Acc:MGI:1915365]	ATGGCGCTGGCCGCCCGTCTCCTACCTCTGCCCCTGCTTTCCCGGCCGCTGCCCGGCCCGGTCACCCGACTCCGGACTCTCGGTAGCACCGAGGTGAGGCTGACGCTGACTGAAATTTGCTGCCTGTGCCGCCGTCGCCTGGGCTCAAGCGCGGCTCCGATCCCTCGCTACACTCGGGCCTGGACAAGCCCTGCGTTGCGTTCCTGGAGCTCCCGAAGATCCCTTCTCGGCCGGGTAGAACATCCTCCAGCCCTCGCTTCTTTACCCGCTAGTCCCAGCCGCAGCTACAGCACCGAGGAGCAGCCCCAGCAACGCCAGAGAACCAGAATGATCATTCTGGGATTTTCCAATCCCATCAACTGGGTCCGGACTCGAATTTACGCCTTCCTTATTTGGGCC…
ENSMUSG00000074797	Itpa	0.1998575341204565	inosine triphosphatase (nucleoside triphosphate pyrophosphatase) [Source:MGI Symbol;Acc:MGI:96622]	ATGGCTGCGTCTTTGGTCGGGAAGAAGATCGTGTTTGTGACGGGAAACGCCAAGAAGCTGGAGGAGGTCATTCAGATTCTCGGAGATAATTTTCCATGCACTTTGGAGGCTCAGAAAATTGACCTGCCTGAGTACCAGGGAGAACCGGATGAGATTTCCATACAGAAGTGTCGGGAGGCAGCTCGACAGGTGCAGGGCCCTGTCCTGGTGGAAGATACCTGTCTGTGCTTTAACGCACTTGGGGGACTGCCTGGCCCCTACATAAAATGGTTCCTACAGAAGCTGAAGCCTGAAGGTCTCCACCAGCTCCTGGCCGGCTTTGAAGACAAATCGGCCTATGCACTCTGCACATTCGCTCTCAGCACTGGGGACCCAAGCCAGCCAGTGCTTCTCTTCAGA…
ENSMUSG00000051611	Olfr112	-0.19774440487434494	olfactory receptor 112 [Source:MGI Symbol;Acc:MGI:2177495]	ATGATAGTGGAAAATATAACCACAATGAGAGGATTCCTCCTCATGGGATTCTCTGACAACCATGAGCTGCAGATCGTACAGGCTGTGCTCTTCTTGGTGACATACCTAGTCGGCTCAGCAGGGAACGTCATCATTATCACCATCACAACACTAGACCCACAGCTCCAGTCTCCAATGTATTACTTTCTGAAGCACCTTTCCATTCTGGACCTCTCATCCCTCTCTGTCACAGTTCCCCAGTATGTTGACAGTTCCCTGGCACAAAGTGGCTACATTTCATATGCACAGTGCATGCTGCAGATTTTTTTCTTCACAGCTTTTGCCTGGGGTGAGCTGGCCATTCTCACAGTGATGTCTTATGACCGCTATGTGGCCATCTGCCTCCCATTGCACTATGAG…
ENSMUSG00000006818	Sod2	0.11528236493791014	superoxide dismutase 2, mitochondrial [Source:MGI Symbol;Acc:MGI:98352]	ATGTTGTGTCGGGCGGCGTGCAGCACGGGCAGGAGGCTGGGCCCTGTGGCCGGTGCCGCGGGCTCCCGGCACAAGCACAGCCTCCCAGACCTGCCTTACGACTATGGCGCGCTGGAGCCACACATTAACGCGCAGATCATGCAGCTGCACCACAGCAAGCACCACGCGGCCTACGTGAACAATCTCAACGCCACCGAGGAGAAGTACCACGAGGCTCTGGCCAAGGGAGATGTTACAACTCAGGTCGCTCTTCAGCCTGCACTGAAGTTCAATGGTGGGGGACATATTAATCACACCATTTTCTGGACAAACCTGAGCCCTAAGGGTGGTGGAGAACCCAAAGGAGAGTTGCTGGAGGCTATCAAGCGTGACTTTGGGTCTTTTGAGAAGTTTAAGGAG…
ENSMUSG00000030532	Hddc3	0.19745499294838578	HD domain containing 3 [Source:MGI Symbol;Acc:MGI:1915945]	ATGGGCTCGGAGGCAGCTCAGCTGCTGGAGGCTGCTGACTTCGCCGCTCACAAACACCGACAGCAGCGACGAAAAGATCCTGAAGGGACTCCCTACATTAATCACCCCATCGGTGTAGCCCGGATCCTAACCCATGAGGCTGGAATCACTGATATTGTGGTGTTACAGGCCGCCCTGCTCCATGACACAGTAGAAGACACAGATACTACCCTGGATGAGGTAGAGCTGCACTTTGGAGCACAGGTTCGACGCTTGGTGGAGGAGGTAACAGATGACAAGACTCTGCCCAAACTGGAAAGAAAGCGGCAACAGGTGGAGCAGGCACCACACAGCAGCCCAGGGGCCAAACTGGTGAAGCTGGCAGACAAGCTATACAATCTGAGGGACCTGAATCGCTGC…
ENSMUSG00000035476	Tab3	-0.8325196725951397	TGF-beta activated kinase 1/MAP3K7 binding protein 3 [Source:MGI Symbol;Acc:MGI:1913974]	ATGGCGCAAAACAGTCCACAGCTTGATATTCAGGTTCTCCATGATCTTCGACAACGTTTTCCTGAAATTCCAGAGGGTGTGGTATCCCAGTGCATGTTACAGAATAACAACAATCTAGAAGCCTGTTGTCGAGCCCTTTCCCAGGAGAGCAGCAAATACTTGTATATGGAATACCATAGTCCAGAAGACAATAGAATGAATAGAAATCGCCTTTTGCATATTAATTTGGGTATTCATTCTCCTAGTAGCTACCACCCAGGAGATGGAGCTCACCTTAATGGTGGTCGGACACTGGTACATAGCTCAAGTGATGGACATATTGATCCTCAGCATACAGCAGGCAAACAGCTGATATGTTTAGTTCAGGAACCACACTCAGCTCCAGCTGTTGTGGCTGCT…
ENSMUSG00000051582	Otud6a	0.2139000830513438	OTU domain containing 6A [Source:MGI Symbol;Acc:MGI:3644685]	ATGTCTGACACCGAGCAGGAACTCCAACGGGTGATCCGTCGCCACTATCGCGAAAAAAGGGAGCTACAAGCACACATCCAGACTTTGAAAGCTTCCGTCCCAAAGAACGACAAGGGCAGACGGAAGCAGATGCTCGCGGACATCTCCCGCCTCGAGGCCGAGATGGAGCAGAGGCACAAGCAGGAGCTGGAGAAATTTGGAGAAAATCCTGACAGCAGTGTGGATTCGGTTACAGCCGACCTCGAAAAGATGAATCTCGAGAATATGCCTCCACGCCCACCCAAGGCCCAGAAACGGCGCGACCGAAGAGCTCACCAGGAGAGACGGCACCAGGAGAGGATGCCTGCGGCCCAGGCCGAACAACTGGCTGCCAACCGTCGTGAGGAGGAGGAAAAGGTC…
ENSMUSG00000021750	Fam107a	0.07952031798609785	family with sequence similarity 107, member A [Source:MGI Symbol;Acc:MGI:3041256]	ATGGCGCAGAAGCTGGGCGAGTGGGCCAGTGCGCCCGCCGAGGCCACCGGGCTGTACCGAGCCGTGCTGCTCAGGTCAGCCTCCATGTACTCAGAGATCCAGAGGGAGCGGGCTGACATCGAGGGACTCATGGCCAGACCAGAGTACAGAGAGTGGAACTCAGAGCTCATCAAACCCAAGAAGCTGCTGAACCCTGTGAAGGCTTCTCGGAGCCATCAGGAGCTGCACCGTGAGCTGCTTATGAACCACAAAAGGGGCTTGGGTATGGACAGCAAGCCTGAGCTGCAGCGAGTTCTAGAGCACCGTCGCAGGAATCAGCTGATCAAAAAGAAGGAGGAGGAGCTAGAGGCCAAGCGGATGCAGTGCCCCTTCAAGCAGGAGCTGCTGAGGCGGCAGCAG…
ENSMUSG00000030397	Mark4	-0.45983465287230707	MAP/microtubule affinity regulating kinase 4 [Source:MGI Symbol;Acc:MGI:1920955]	ATGTCTTCGAGGACGGCGCTGGCCCCGGGCAACGATCGAAACTCGGACACGCATGGCACATTGGGCAGTGGACGATCTTCGGACAAAGGGCCGTCCTGGTCCAGCCGTTCCCTGGGTGCCCGTTGCCGGAACTCTATCGCTTCCTGCCCTGAGGAACAACCCCATGTGGGCAACTATAGGCTGCTAAGGACCATCGGGAAGGGCAACTTCGCCAAAGTCAAGCTGGCTCGGCATATCCTCACGGGCCGGGAGGTCGCTATTAAGATCATTGATAAGACCCAGCTGAACCCCAGTAGCTTGCAGAAGCTGTTCAGAGAAGTCCGAATTATGAAGGGACTCAACCACCCCAACATCGTGAAGCTTTTTGAGGTGATAGAGACGGAGAAGACGCTATACCTG…
ENSMUSG00000031220	Awat2	0.2645977716934278	acyl-CoA wax alcohol acyltransferase 2 [Source:MGI Symbol;Acc:MGI:3045345]	ATGTTCTGGCCCACCAAGAAGGACCTCAAGACCGCCATGGAGGTCTTTGCTCTTTTCCAGTGGGCCCTCAGTGCCTTGGTTATAGTCACCACTGTGATCATTGTCAACCTCTACTTGGTGGTGTTCACATCTTACTGGCCTGTCACCGTGTTGATGCTCACCTGGCTGGCTTTTGACTGGAAGACCCCTGAGCGAGGTGGCCGCAGGTTCACCTGTGTGAGGAAGTGGCGTCTGTGGAAACACTATAGCGACTACTTCCCACTCAAGATGGTGAAGACGAAAGATATTTCACCTGACCGCAACTACATCCTTGTCTGCCATCCTCATGGGCTCATGGCCCATTCATGTTTTGGTCACTTTGCCACTGACACAACAGGCTTTTCCAAGACCTTTCCTGGT…
ENSMUSG00000025873	Faf2	-0.27473361407381713	Fas associated factor family member 2 [Source:MGI Symbol;Acc:MGI:1923827]	ATGGCGGCGCCTGAGGAGCAGGATCTAACTCAGGAGCAGACCGAGAAGCTGCTGCAGTTTCAGGATCTGACTGGCATAGAGTCCATGGAGCAGTGTCGCCTTGCTTTGGAGCAGCATAACTGGAACATGGAGGCTGCTGTCCAGGACAGACTGAATGAGCAGGAAGGTGTACCAAGTGTTTTCAATCCACCGCCAGCTCGGCCCCTACAGGTTAATACAGCTGACCACAGGATCTACAGCTATGTTGTCTCAAGACCACAACCAAGGGGCCTGCTTGGATGGGGTTATTACTTGATAATGCTTCCATTCCGGTTTACCTATTACACGATACTTGATATATTTAGGTTTGCTCTTCGTTTTATACGGCCTGACCCTCGCAGCCGGGTCACTGACCCTGTT…
ENSMUSG00000070332	Trim80	-0.6845450042263589	tripartite motif-containing 80 [Source:MGI Symbol;Acc:MGI:3588186]	ATGAAACAGCGGCCACAGAGAAAGGAGAGAAGACGGCAATCATCGGTCCACAGGGCAACAAAATATCTGGCTCTCATGGACATGCAGAAGATCTCAAGATCAGCCCAGGACAAACCCCCCTCACAGCTCTCTTCCCAGCCCTCCAGAACCCCGCTCCATCTCCTGATGGGCAGCAACAGCAGTCAGCACATGTTGGAAGACCAAGTCCTCTGTCCCATTTGCCTGGAGGTGTTCTGCAACCCAGTCACTACCGCCTGCGGCCATAACTTCTGTATGACTTGCCTTCAGAATTTCTGGGACCACCAGGCTGCCATTGGAGAGACTTACTATTGCCCCCAGTGCAGAGAGGCCTTCTCCAGCAGGCCCCGCCTCTGCAAGAACGTCATCCTCGGGGAGATG…
ENSMUSG00000063221	Olfr930	-0.10647771552544558	olfactory receptor 930 [Source:MGI Symbol;Acc:MGI:3030764]	ATGGCCACTGGGAATCATTCTGCAGCAGTTGTGTTTGTTTTGGTGGGATTAACACAGCAGCCTGAGCTCCTGCTGCCCCTCTTCATTCTGTTCCTGGGCATCTATGTGGTGACAGCAGTGGGGAACCTGGGCATGATCCTGCTCATCACAGTCAGCCCACTGCTGCATACTCCCATGTACTATTTCCTCAGCAGCTTATCCTTTGTTGATCTCTCCTATTCCACTGTCATTACACCCAAAATGCTGGTGAACTTTCTTGGGAAGAAAAATTTCATCACTTATTCGGAGTGCATGGCTCAGTTCTTTTTCTTTGCGGTCTTTGTGGTCACTGAGGGTTACCTCCTGACTGTTATGGCGTATGATCACTACGTGGCCATCTGCAGACCATTGCTGTATAAT…
ENSMUSG00000092292	Olfr113	-0.09897567222241319	olfactory receptor 113 [Source:MGI Symbol;Acc:MGI:2177496]	ATGATAGTGGAAAACATAACCACAATGAGAGGATTCCTCCTCATGGGATTCTCTGACAACCATGAGCTGCAGATCTTACAGGCTTTGCTCTTCTTGGTGACATACCTATTGGGCTCAGCAGGGAACGTCATCATTATCACCATCACAACACTAGACCCACAGCTCCAGTCTCCAATGTATTACTTTCTGAAGCACCTTTCCATTCTGGACCTCTCATCCCTCTCTGTCACAGTTCCCCAGTATGTTGACATTTGCCTGACACAGAGTGGCTACATTTCATATGCACAGTGCATGCTGCAGATATTTTTCTTCACAGGTTTTGCTTGGGGTGAGGTGGCCATTCTCACAGTGATGTCATATGATCGGTATGTAGCTGTTTGTCTTCCACTTCACTATGAA…
ENSMUSG00000044770	Scml4	-0.13306615689418963	Scm polycomb group protein like 4 [Source:MGI Symbol;Acc:MGI:2446140]	ATGCAGACACAGAGGGTGCCAGGGAGGAAACGTGGCCGGCCTCCACTTCACTCCACACGGGTGCAGATGGCCGTCCATAACCTCTATTCTGCTTCTGCTGCCTCTGTGCCAGCAGTGACAATCCCAAAGAAGAGAGGACGGAAGCCCAGGTACAAGATCAAGTCTCCAGTGCTCATGACTCCCTTGGCCCTGTCACCTCCACGGAGTACCCCGGAACCCGATCTCAGCTCCATCCCTCAGGATGCAGCCACCATTCCCAGCCTGGTGGTCCCAGAGGCTCTCACAGTATGCCTCTACATAAACAAACAGGCCGATGTGGGGCCGTACCTGGAGAGGAGGAAGCTACAGCAGCTTCCGGAGCGCCTGGGACCTGAGCGGCCCGCCACCGTCCTGCAGCAG…
ENSMUSG00000054054	Olfr309	-0.07409608924180996	olfactory receptor 309 [Source:MGI Symbol;Acc:MGI:3030143]	ATGATGAACTTCAGCATTGTTAGTGAGTTTATGATTCTGGGACTTACTCAAAAGTCTGAACTTCAGGGAATACTTTTCATTGTTTTTCTTTTTATCTACCTTGTGGCTCTACTTGGTAATATGCTAATTGTTGTTGCCATAATCTATAACACCACCTTGCACACACCCATGTATATTCTCCTTCTGGCCTTGGCTGTGGTGGACATAATCTGCACTACAAGCATCATACCCAAAATGTTGGGAACTATGTTAACATCAAAAAATTCAATTTCATATGGGGGTTGCATGTCCCAGCTCTTCTTTTTCACATGGTCCTTGGGGGCTGAGATGGTGCTCTTTACTACAATGGCCTATGACCGCTATGTGGCCATTTGCTTCCCACTTCGCTATAGTACTATT…
ENSMUSG00000024223	Armc12	-0.13197326331217737	armadillo repeat containing 12 [Source:MGI Symbol;Acc:MGI:1914895]	ATGGGCAAGACCATTCCCCGGTTCCTGGAGCAACTGGACCTCATCAAAAGCTTCGTGGGCCTGGCTACAGGCGCCGGGGCCTTATACCTGCTGTACAAGGCCGTCAGGACTGGCTTAAAATGTCATCCGCCACTCTGCTCCAACTCGCCGATCTGCATTGCCCGTAAGTGTCCAGGTCCTGGGGAGAGGGCTCTGCCCCAGGAAGCCTCCCTAAGGCCTCCCCTGGGGGGTGGGGGCAAAGGCCTGGCCATCGAGAGAGAGCGCCACGGGCGGGACTCCGGTGAGATTCGAAGACTTCTCAACTCTCTAGACTGCAAACAGGATGAGTATACCAGGAGCATGATCCTTCATAACATCACCCGCTGCGTGTACTTGCTGGAGGCTGAGGCCTCTTCTTGT…
ENSMUSG00000059371	Olfr427	0.5436418333701257	olfactory receptor 427 [Source:MGI Symbol;Acc:MGI:3030261]	ATGGATAAGAAGAATCAGACGAAGGTGACAGAGTTTTATTTTTCTGATTTCCCTCAGTTTGAGGATGGTGGCCTTTTGCTCTTCATCCTTCTGCTCTGTGTCTACCTCTTCATTGTTGTTGGGGATGCTGTGATCTTCTTGGATGTGCAGCTGGATGTCCGTCTGCACAATCCCATGTACAGTTTCATCAGCATCTTCTCCTTCCTGGAGATTTGCTACACCACAGTGACCATTCCCCAAATGCTCTACAACCTGGTCAGCAAAGAGAAAACCATCTCCTTCATTGGCTGTCTGCTGCAGATGTATTTTTTCCATTCCTTTGGAGTCACAGAAAGCTTAGTCCTCACAATAATGGCCATCGACAGGTATGTTGCCATCTGTAACCCACTTCGCTATGCA…
ENSMUSG00000050014	Apol10b	0.2748250202852196	apolipoprotein L 10B [Source:MGI Symbol;Acc:MGI:3043522]	ATGGCTAGAGCTTGGTGCTCAACAGACCTCAAGCAAGGAGTAGCTCGAAGTGTTGATGGAGTCGCTGATATTGTCACGGAAAAATTCTTGAAAACAGATCTGAGGAGCCTGATAACTGAAGATGGAGCCTGGAAGGCATTTGAGGAAGCAGCAGAATTGTCAAGTGAGGAGGGAGCTATACTTCGTGATGCTCTGAAGGAGAGTTTAGCACAGGAGCCCTCAGATGAAAATGACGGACCTGAAAGGAAGCAGCAGAATGAGCGGTTTCTGCGAGAGTTTCCTGAGTTGAAGAAGAAACTTGAGGACCACATCAGGAAGCTCCGAGACCTGGCTGATCATCTTGACCAGGTGCACAAGGACTGCACCATCTCCAATGTGGTGTCCACCTTTGCTAGTGCT…
ENSMUSG00000050493	Fam167b	-0.05373652981751373	family with sequence similarity 167, member B [Source:MGI Symbol;Acc:MGI:2668032]	ATGTCCCTAGGGCCGCTGAAATTCCAGGCAGTGGGAGAGAAGGGTGAGGAGGATGAGGAAGAGAGCTTAGATTCTCTGAAGGCCCTGACTGCCAAGCTTCAACTGCAGACCCGACGGCCCTCATACCTCGAGTGGACTGCCAGAGTCCAGAGCCGGGCTTGGTACAGAGCCCAAGCTAGACCTGAGCCAGTCGGACCCGGGGCCATCTGTGGCTTTGACTCCATGGATTCTGCGCTTGAGTGGCTCAGACGGGAGCTGCAGGAGATGCGGGCTCAGGACCGGCAGCTGGCAGGGCAGCTGCTCAGGCTGCGGGCCCGGCTGCACAGACTGAAAGTGGACCAAGTCTGTCACCTGCACCAGGAGCTTCTGGATGAGGCTGAGCTGGAGATGGAGTTAGAG…
ENSMUSG00000051510	Mafg	-0.005583631922154362	v-maf musculoaponeurotic fibrosarcoma oncogene family, protein G (avian) [Source:MGI Symbol;Acc:MGI:96911]	ATGACGACCCCCAATAAAGGAAACAAGGCCTTAAAGGTGAAGCGGGAGCCAGGCGAGAATGGCACCAGCTTGACCGACGAGGAGCTGGTAACCATGTCGGTGCGAGAGTTGAACCAGCACCTGCGAGGCCTCTCCAAGGAAGAGATCATCCAGCTGAAGCAGCGGAGGCGCACACTGAAGAACCGGGGCTACGCGGCCAGCTGCCGCGTCAAGCGGGTGACACAGAAGGAGGAGCTGGAGAAGCAGAAGGCGGAGCTCCAGCAGGAGGTGGAGAAGCTGGCCTCGGAGAATGCCAGCATGAAGCTGGAGCTCGATGCCCTGCGCTCCAAGTACGAGGCCCTGCAGAACTTTGCCAGGACCGTGGCCCGCAGCCCTGTGGCCCCAGCTCGGGGTCCCCTT…
ENSMUSG00000037204	Atg101	0.22463468357087593	autophagy related 101 [Source:MGI Symbol;Acc:MGI:1915368]	ATGAACTGTCGATCAGAAGTGCTGGAGGTGTCGGTGGAGGGGCGGCAGGTGGAGGAGGCCATGCTGGCGGTGCTGCACACGGTGCTCCTGCACCGCAGCACGGGCAAGTTTCACTACAAGAAGGAGGGCACGTACTCCATAGGCACCGTGGGCATCCAGGATGTAGACTGTGACTTCATCGACTTCACCTATGTGCGCGTCTCCTCAGAGGAGCTGGACCGTGCCTTGCGCAAGGTTGTTGGGGAATTCAAGGATGCACTGAGGAACTCAGGTGGTGATGGCCTGGGCCAGATGTCCTTGGAATTCTATCAGAAGAAAAAGTCTCGATGGCCTTTTTCGGATGAGTGCATCCCCTGGGAGGTGTGGACTGTCAAGGTGCACGTGGTAGCCTTGGCCACA…
ENSMUSG00000030898	Cckbr	-0.018284835197602243	cholecystokinin B receptor [Source:MGI Symbol;Acc:MGI:99479]	ATGGATCTGCTCAAGCTGAACCGCAGCTTGCAGGGACCAGGACCCGGGTCAGGGTCTTCTTTGTGCCGCCCGGGTGTCTCCCTCCTCAACAGCAGTAGCGCCGGCAACCTCAGCTGCGAGACCCCTCGTATCCGCGGAACCGGGACCAGAGAATTGGAGTTGACCATTCGAATCACCCTTTATGCGGTGATCTTTCTGATGAGTGTTGGCGGAAACGTGCTCATCATTGTGGTCCTGGGACTGAGCCGACGCCTAAGAACGGTCACCAACGCCTTCCTACTCTCCCTGGCAGTCAGCGACCTCCTGCTGGCTGTCGCTTGCATGCCCTTCACACTCCTGCCCAACCTCATGGGCACATTCATCTTCGGCACAGTCATCTGCAAGGCCGTTTCCTACCTC…
ENSMUSG00000054690	Emcn	-0.36709152118737387	endomucin [Source:MGI Symbol;Acc:MGI:1891716]	ATGCGGCTGCTTCAAGCGACTGTTCTTTTCTTCCTTTTGTCCAACAGTCTCTGCCACAGTGAGGACGGCAAAGATGTTCAGAATGACTCTATTCCAACACCGGCAGAAACTTCCACAACAAAAGCCTCTGTCACAATACCAGGCATCGTGTCAGTGACAAATCCTAACAAACCAGCAGATGGAACACCTCCCGAAGGAACGACCAAAAGTGACGTATCCCAAACATCTTTGGTGACAACAATTAATTCACTGACAACACCAAAACATGAAGTGGGAACAACAACTGAAGGTCCCCTAAGGAATGAAAGTTCCACTATGAAAATAACAGTGCCAAATACTCCAACTTCAAATGCTAATTCAACGCTACCAGGTTCCCAGAACAAGACTGAGAATCAGAGT…
ENSMUSG00000048581	E130311K13Rik	-0.39985367250770876	RIKEN cDNA E130311K13 gene [Source:MGI Symbol;Acc:MGI:3607716]	ATGGCGCGGCCGCCCGCGAGCCTCGGGTCGCAGGCGCCGGACCGCGACCGAGGGGAGGCCAACGTGGTGACACGGGTGTCGCAATGGGCAGACAACCATCTGCGCCTTGTCCAGAACATCAGCACGGGAATGGCCATAGCTGGGATAATGTTGCTGATAAGGAGCGTCCGGCTGACCTCAAAATTTACAACCTCTTCAGATATTCCAGTAGAATTTATAAGAAAGAAAGTTAAACTACGTGGCCGATTACAGCGGATAACTGAGTGTGGTCTAGAAATTGAACATATACCTATTACTTTACCTTTCATATCTTCATGGAAAGAAGAACCACGTGGAGTTTTGCTGGTTAAACTGGCTGGAGTAGAACTCACTGAAAGTGGTAAGGTGTGGCTACAGGCA…
ENSMUSG00000022949	Clic6	0.17237327195904298	chloride intracellular channel 6 [Source:MGI Symbol;Acc:MGI:2146607]	ATGGCTGAGGCCACGGAGCCCAAGGAGGTCGCTCCAGGTTCCCAGGGGCAACCCGAAGGTGCGACAATCGAGGGACCAGGAGAGCCAGGAGCTGCGGACCTGGAGGGGCGGGAAGCGAGCGAGGAAGCTGCAGAGGCACCTAGGGACCTGGGGGCGGGCGTAGAGGCCAGGGCCTCGGGGAAGGAGGAAGGAGGCTGTGGGCAGGACGAGGGAACTGGGGGAGCGCAGGCGCAGGACCCGCGCACCGGCCCTGAGGCCGAGACGCCGGGCGCCAGCGGAGCTCCAGGTGAAGCGGAGGCTGCGGAGCGCGACCCCGAGGGCGCGATCCCGCAGGGAGCGGAGGAGGCGCCAAGCGCCCAGCAGGTGCAGGGGATGAGCTCTGGGTTAGACTCTCAGGGT…
ENSMUSG00000030533	Unc45a	-0.015491794518783217	unc-45 myosin chaperone A [Source:MGI Symbol;Acc:MGI:2142246]	ATGGGCCTCCAGGGGAGAGGTCCAGGGCTCCTGCTGACAGGCCTGTGTGGGGGACTGCTTTTCAGTTGGATGAATCTTGCCCAGCCAACCGACCTCTCAGCCCTGGCTCACCACCCCCATTTGTGCCAGACTACACGGGATGCAGAAGGCGGCCACTACCCTGGTTTTTTCTGTCCGCGCCTCTCTGACACTCCCGAGGAAGCCTACTGTTGCCACCTGCAGGCTGCCGGGGGTTCCTGCTGTACCCTGGATGAATTTGAGGCCCTGTACCAAGTTAACTTGTCTTCGCTTCAGCCACCACCCATCCTCAGGGGTCCAGGCCCGCTCCTAGCACTGGGCATCTACACTCTACTGCTGATGGCACTGATGACTACAGATTTCGTGCACTTCTGCCGTGGT…
ENSMUSG00000023943	Sult1c1	0.5317778638608309	sulfotransferase family, cytosolic, 1C, member 1 [Source:MGI Symbol;Acc:MGI:102928]	ATGCCCTTGGAAAAATTGAAAGACCTCCACCTCGATGAACAGAACATGCAGCCAGAAACCAGGGAAGTGAATGGGATTCTAATGTCCAAGATGATGAGTGAAAACTGGGACAAAATTTGGAACTTCCAAGCAAAGCCCGATGATCTCCTCATTGCAACCTATGCAAAGGCAGGTACCACCTGGACACAGGAAATTGTGGACATGATCCAAAATGATGGGGATGTTCAAAAGTGCCAGCGGGCCAATACCTATGACCGACACCCTTTCATTGAGTGGACTTTGCCTCCACCCCTCAACTCAGGTCTGGATCTGGCTAACAAAATGCCTTCACCTAGAACTCTGAAGACTCATCTGCCTGTTCAAATGCTTCCACCTTCCTTTTGGAAAGAAAACTCAAAG…
ENSMUSG00000019929	Dcn	0.27774366890900115	decorin [Source:MGI Symbol;Acc:MGI:94872]	ATGAAGGCAACTCTCATCTTCTTCCTTCTGGCACAAGTCTCTTGGGCTGGACCATTTGAACAGAGAGGCTTATTTGACTTCATGCTAGAAGATGAGGCTTCTGGCATAATCCCTTATGACCCTGACAATCCCCTGATATCTATGTGCCCCTACCGATGCCAGTGTCATCTTCGAGTGGTGCAGTGTTCTGATCTGGGTTTGGACAAAGTGCCCTGGGATTTTCCACCCGACACAACCTTGCTAGACCTGCAAAACAACAAAATTACAGAGATCAAAGAAGGGGCCTTCAAGAACCTGAAGGACTTGCATACCTTGATCCTTGTCAACAACAAGATCAGCAAAATCAGTCCAGAGGCATTCAAACCTCTCGTGAAGTTGGAAAGGCTTTACCTGTCTAAG…
ENSMUSG00000075408	Smim41	0.12020873893205933	small integral membrane protein 41 [Source:MGI Symbol;Acc:MGI:1924967]	ATGAACGGCTCACAGGTGGGAGCTGCAGCCAAGGCTGCCTGGCTGAGCTGCTGCAACCAGTCCGGGCTGCCACTCGGACCCCCAGAGGGGCCACGCATGGTGCAGGCAGTCGTGCTGGGCGTCCTGTCACTTTTGGTGCTCTGTGGGATCCTGTTCCTGGGTGGTGGACTCCTCCTCCGCGCTCAGGGCCTGATAGCCCTGCTGGCCCGAGAAAGGCATTCAACCCCGAGGCTGAGCCTGGTGCCTGTGGAGGGGATGACGACTCCTAGGTGTCAGCTGCTCTTGAGATTCAGCCTGTTCTGTGCCACGCCATCCAGAGTTCATTTCTGTGAGGCACAGCGGAAGGTCCAACCCACAAGCTCTTATTTCCCGCACAGGTGCTGGACATCTCCCCTCGCC…
ENSMUSG00000028010	Gar1	0.46912930533786457	GAR1 ribonucleoprotein [Source:MGI Symbol;Acc:MGI:1930948]	ATGTCTTTCCGAGGCGGAGGTCGCGGAGGCTTTAATCGCGGTGGTGGAGGCGGAGGCTTCAACCGTGGCGGCGGCAGCAACAACCACTTCCGAGGGGGCGGCGGAGGCGGCGGCGGCAGTTTCAGGGGCGGAGGCGGCGGCGGCGGCGGCAGTTTCAGGGGCGGCGGCCGAGGAGGATTTGGACGAGGGGGCGGTCGTGGAGGCTTTAATAAATTTCAAGATCAAGGGCCTCCAGAACGTGTCGTCTTGTTAGGAGAATTCATGCATCCCTGTGAAGATGACATCGTGTGTAAATGTACCACCGAGGAGAACAAGGTGCCCTACTTCAACGCCCCTGTTTACTTAGAAAACAAAGAGCAAGTCGGGAAAGTGGATGAGATATTTGGACAGCTTAGAGAT…
ENSMUSG00000038872	Zfhx3	-0.6879482363323236	zinc finger homeobox 3 [Source:MGI Symbol;Acc:MGI:99948]	ATGGAAGGCTGTGACTCGCCCGTCGTCTCGGGGAAGGACAATGGGTGCGGGATCCCTCAGCACCGGCAATGGACTGAACTCAACAGCGCCCACCTCCCCGACAAACCCAGTAGCATGGAGCAGCCCACAGGCGAGAGCCATGGGCCCCTGGACAGCCTGAGGGCCCCCTTCAATGAGCGCCTGGCGGACAGCAGCACCTCCGCTGGGCCGCCCGCCGAGCCCGCCAGCAAGGAGGTCAGCTGCAACGAGTGCTCAGCCTCCTTTTCCAGCCTCCAGACCTACATGGAGCATCACTGCCCTGGCACGCATCCCCCGCCGGCCCTGCGAGAGGAGAGCGCCAGCGACACCAGCGAGGAGGGCGAGGAGGAGAGCGATGTGGAGAACCTGGCCGGGGAGATC…
ENSMUSG00000068876	Cgn	-0.3894318258048409	cingulin [Source:MGI Symbol;Acc:MGI:1927237]	ATGATGGCTGATCCCCGGGGCCCCGTAGACCATGGAGTTCAAATTCGATTTATTACAGAGCCAGAGGGTGCTACTGAAATGGGCACCCTTCGTCGTAGTGGGCGGCGCCCTGCAAGGGATGCAAGAGCCAGTACCTATGGGGTCGCTGTGCGTGTGCAGGGCATCGCCGGGCAACCGTTTGTGGTTCTTAACAGTGGAGAGAAAGGGACTGACTCCTTTGGGGTCCAGATCAAAGGGGGCAACAACCGGGGGTCCCCAGGTGCACTGAGCTCCGATTCAGAGCTCCCCGAAAACCCCTACTCTCAAGTCAAGGGACGCCCTGCCACTTCTCGGAGCAGCACATCTGATGAGGAGCCCAAGGACCACTTGAATGGAAAACTGATCCGTTCCCAGTCGCAA…
ENSMUSG00000078896	Zfp965	-0.7188847460785946	zinc finger protein 965 [Source:MGI Symbol;Acc:MGI:3779822]	ATGCGTGACTCTACTGGGTGTTGTGAGAGGAGGTTAGTCAAGCTCAGAACTCCAAACATGGATTTACTCACCTATGATGACGTGCATGTGAACTTCACTCAGGAAGAGTGGGCTTTGCTGGATGCTTCTCAGAAGAGTCTCTACAAAGGTGTGATGGTAGAGACCTATAGGAATCTCACAGCTATAGGTTACAGTTGGGAAGAACATACAATTGAAGACCATTTCCAAACTTCTAGAAGTCTTGGAAGGCATGAAAGACGTTCTTCTGCAGAGCAACACTCTGAGTTTATTCCATGTGGTAAAGCCTTTGCATATCAGAGTCGTAGTCAAAGGCATGTAAGAATACACAATGGAGAGAAACACTATGAGTGTAACCAATGTGGTAAAGACTTTGGAACA…
ENSMUSG00000037434	Slc30a1	-0.19320029745646447	solute carrier family 30 (zinc transporter), member 1 [Source:MGI Symbol;Acc:MGI:1345281]	ATGGGCTGCTGGGGCCGCAACCGCGGCCGGCTGCTGTGCATGCTGCTGCTGACCTTCATGTTCATGGTGCTGGAGGTGGTGGTGAGCCGGGTGACCGCGTCGCTCGCCATGCTGTCCGACTCCTTCCACATGCTGTCGGACGTGCTGGCGCTCGTAGTGGCGCTGGTGGCCGAGCGCTTCGCCCGGAGGACTCACGCCACGCAGAAGAACACGTTCGGCTGGATCCGCGCTGAGGTGATGGGCGCACTGGTGAACGCCATCTTCCTCACGGGGCTGTGCTTCGCCATCCTGCTGGAAGCCGTCGAGCGCTTCATCGAGCCGCATGAGATGCAGCAGCCGCTCGTGGTGCTGAGCGTCGGCGTGGCGGGGCTGCTGGTCAACGTGCTGGGGCTCTGTCTG…
ENSMUSG00000084957	Bbip1	0.503193351583966	BBSome interacting protein 1 [Source:MGI Symbol;Acc:MGI:1913610]	ATGGCAGAAGTGAAGTCGATGTTCCGAGAAGTCCTTCCAAAACAAGGGCAGTTGTCTGTGGAAGATGTAACCACAATGGTGCTGTGTAAACCCAAGCTCTTGCCCTTAAAATCTCTGACGCTGGAAAAACTGGAGAAAATGCAGCAAGCAGCACAGGATACAGTCCGTCAACAAGAAATGGCAGAAAAGGCAACGAGCAAATAA
ENSMUSG00000078652	Psme3	0.09923587369847989	proteaseome (prosome, macropain) activator subunit 3 (PA28 gamma, Ki) [Source:MGI Symbol;Acc:MGI:1096366]	ATGGCCTCGTTGCTGAAGGTGGATCAGGAAGTGAAGCTCAAGGTTGATTCTTTCAGAGAGCGGATCACAAGTGAGGCAGAAGACTTGGTGGCAAATTTTTTCCCAAAGAAGTTACTAGAACTTGATAGTTTTTTGAAGGAACCAATTCTAAATATCCATGACCTAACTCAGATCCACTCAGACATGAACCTCCCAGTCCCTGACCCCATTCTCCTCACCAATAGCCACGATGGACTGGATGGTCCCACTTACAAGAAGCGCAGGTTGGATGAATGTGAAGAGGCCTTTCAAGGAACCAAGGTGTTTGTGATGCCCAATGGGATGTTGAAAAGCAACCAGCAGCTTGTGGACATTATTGAGAAAGTAAAACCCGAGATTCGGCTGCTGATCGAGAAATGT…
ENSMUSG00000043715	Olfr1326-ps1	0.13564977273187565	olfactory receptor 1326, pseudogene 1 [Source:MGI Symbol;Acc:MGI:3031160]	ATGACACCATTGAAGAAAAACCACACCTTAAGCTCTGAATTTATTATTTTAGGCTTTGGGGACCTGGCTGAACTACAGTTTCTCTTTTTTGGACTCTTTCTAATTATGCATCTCATCACCCTAGCAGGCCATACAACTATTGTACTCATCACCCTTATTGACACCTGTCTCCAGACACCTATGTATTTCTTCCTTCGGAACCTATCTGCCATTGAAATTTGCTACATATTAGTTATTGTCCCTAACATGCTGGCCAACTTCCTGTCCAGAAACCAGCGAATGCCATTCCTGGGATGTGCTCTGCAAATGCACCTATTCATTGCTCTGGGTGGAGCAGAATGTTTCCTCCTTGCTGCAATGGCATATGACCGTTTTGTGGCCATCTGTAACCCACTGCGT…
ENSMUSG00000022607	Ptk2	-0.33639301331061733	PTK2 protein tyrosine kinase 2 [Source:MGI Symbol;Acc:MGI:95481]	ATGGCAGCTGCTTATCTTGACCCAAACTTGAATCACACACCAAGTTCGAGTACTAAGACTCACCTGGGTACTGGCATGGAACGGTCCCCTGGTGCAATGGAACGAGTATTAAAGGTCTTTCATTATTTTGAAAGCAGTAGTGAGCCAACCACCTGGGCCAGTATTATCAGGCATGGAGATGCTACTGATGTCAGGGGCATCATTCAGAAGATAGTGGACAGTCACAAAGTAAAGCACGTGGCCTGCTATGGATTTCGCCTCAGTCACCTGCGATCGGAGGAGGTGCACTGGCTGCACGTGGACATGGGTGTCTCCAGTGTGAGGGAGAAATATGAACTCGCCCACCCACCAGAGGAGTGGAAATATGAGTTGAGAATTCGTTACTTGCCAAAAGGATTT…
ENSMUSG00000032244	Fem1b	0.039160299458789544	fem 1 homolog b [Source:MGI Symbol;Acc:MGI:1335087]	ATGGAGGGCCTGGCTGGCTATGTGTACAAGGCGGCCAGCGAGGGCAAGGTGCTCACTCTGGCTGCCTTGCTCCTTAACCGGTCAGAGAGCGATATCCGCTACCTGCTGGGCTATGTCAGTCAGCAGGGAGGACAGCGCTCCACACCCCTCATCATCGCAGCCCGCAATGGGCACGCCAAGGTGGTGCGCTTGCTGTTAGAACACTACCGTGTGCAGACCCAGCAGACCGGCACCGTCCGCTTCGACGGGTATGTCATTGACGGTGCCACTGCTCTTTGGTGTGCTGCGGGAGCCGGACATTTTGAAGTTGTTAAACTTCTAGTCAGCCATGGAGCCAACGTGAACCACACCACAGTCACTAACTCAACTCCATTGCGGGCAGCATGCTTTGATGGCAGA…
ENSMUSG00000043719	Col6a6	0.20187157826210148	collagen, type VI, alpha 6 [Source:MGI Symbol;Acc:MGI:2444259]	ATGCTGCTGGTTTTGTGCCTGACAATGATTTGTTTCCACGTGTGTGTGAACCAAGATTCTGGCCCCGAGTACGCAGACGTGGTGTTTCTGGTGGACAGCTCCGATCACCTAGGGCTTAAGTCCTTTCCTCTTGTGAAAACTTTCATCCACAAGATGATCAGCAGCCTCCCCATAGAGGCCAACAAGTACCGCGTGGCCCTGGCCCAGTACAGCGATGCTCTCCACAATGAGTTCCAGCTGGGCACCTTCAAGAACAGGAACCCCATGCTGAACCACCTGAAGAAGAACTTCGGGTTCATCGGTGGCTCCCTGAAGATAGGGAACGCCCTGCAGGAGGCTCACAGGACCTATTTCTCTGCTCCCACAAATGGAAGAGACAAGAAACAGTTCCCCCCAATC…
ENSMUSG00000015441	Gzmf	0.5348205711356829	granzyme F [Source:MGI Symbol;Acc:MGI:109254]	ATGCCACCAATCCTGATTCTCCTGACCCTTCTTCTGCCTCTCAGAGCTGGAGCAGAGGAGATCATCGGGGGCCATGAGGTCAAGCCCCACTCCCGCCCTTACATGGCACGTGTGAGGTTTGTGAAAGATAATGGAAAAAGACATTCCTGTGGAGGCTTCCTGGTTCAAGACTACTTTGTGCTGACGGCTGCTCACTGCACTGGAAGCTCAATGAGAGTCATACTGGGGGCCCACAACATCAGGGCTAAGGAAGAGACACAGCAGATCATCCCTGTGGCAAAAGCCATTCCCCACCCAGCTTATGATGATAAGGACAACACCAGTGACATCATGCTATTAAAGCTGGAGAGTAAGGCCAAGAGAACTAAAGCTGTGAGGCCCCTCAAGTTGCCCAGACCC…
ENSMUSG00000025138	Sirt7	-0.3662367351834067	sirtuin 7 [Source:MGI Symbol;Acc:MGI:2385849]	ATGGCAGCCGGTGGCGGTCTGAGCCGCTCGGAGCGCAAAGCTGCTGAGCGGGTCCGGAGGCTGCGGGAGGAGCAGCAGCGGGAGCGCCTCCGCCAGGTGTCACGCATCCTGAGGAAGGCGGCTGCAGAGCGCAGCGCGGAGGAGGGCCGGCTCTTGGCCGAGAGCGAGGATCTGGTGACCGAGCTGCAGGGTCGAAGTCGGCGGCGTGAGGGCCTCAAGCGCCGCCAGGAGGAGGTGTGTGATGACCCGGAGGAGCTGCGGAGGAAGGTCCGCGAACTGGCCGGAGCTGTCCGAAGTGCCAGGCACTTGGTTGTCTACACGGGCGCTGGAATCAGCACAGCAGCTTCTATCCCAGATTATCGGGGTCCTAATGGAGTATGGACACTGCTTCAGAAAGGA…
ENSMUSG00000041801	Phlda3	-0.13930699596300897	pleckstrin homology like domain, family A, member 3 [Source:MGI Symbol;Acc:MGI:1351485]	ATGACGGCGGCGGCGACCGTGCTGAAGGAGGGCGTGCTGGAGAAGCGCAGCGGCGGGCTGCTGCAGCTGTGGAAGCGGAAGCGCTGCGTGCTCACCGAGCGCGGGCTGCAGCTCTTCGAGGCCAAGGGCACGGGCGGCCGGCCCAAGGAGCTCAGCTTCGCCCGCATCAAAGCCGTGGAGTGCGTAGAGAGCACCGGGCGCCACATCTACTTCACGCTAGTGACCGAAGGCGGGGGCGAGATCGACTTCCGCTGCCCCCTCGAAGACCCTGGCTGGAACGCTCAGATCACCCTGGGCCTGGTCAAGTTCAAGAATCAACAGGCCATCCAGACTGTGCGGGCCCGGCAGAGTCTTGGGACTGGGACCCTTGTGTCCTAA
ENSMUSG00000063382	Bcl9l	-0.3022301332371341	B cell CLL/lymphoma 9-like [Source:MGI Symbol;Acc:MGI:1933114]	ATGAGGATCCTGGCTAACAAGACAAGGTTACCCCACCCCAGGAGGAGAGAGGCTCCAGGGAGTCCACCGCTGTCCCCTCGGGGCCACTGCCCCCCTGCCCCAGCCAAGCCAATGCACCCAGAAAATAAACTGACCAATCATGGCAAGACAGGGAATGGAGGGGCCCAATCCCAGCACCAGAATGTGAACCAAGGACCCACCTGCAACCTGGGCTCCAAGGGCGTGGGGGCGGGGAGCCATGGGGCCAAGGCCAACCAGATCTCACCTAGCAACTCAAGTCTGAAGAACCCCCAGGCAGGAGTGTCTCCTTTCAGCTCACTCAAGGGCAAGGTGAAGCGCGAGAGGAGTGTGTCTGTGGACTCTGGAGAGCAGCGGGAAGCTGGGACTCCATCCCTCGAT…
ENSMUSG00000015443	Gzmn	0.6064571588416822	granzyme N [Source:MGI Symbol;Acc:MGI:2675494]	ATGCTACCAGTTCTGATTCTCCTGATCTTTCTTCTGCCAGTAGGAGATGGAGCAGAGGAGGTCATCGGGGGCCATGAGGTCAAGCCCCACTCTCGCCCTTACATGGCATTAGTTGTGTTTCTGAAAGTTAATGGGATTGGAAGTTCCTGTGGCGGCTTCCTGGTTCAAGACTACTTTGTGCTGACGGCTGCTCACTGCATTGGAAGCTCAATGACAGTCACACTGGGGGCCCACAACCTCCGTGCACAGGAGGAGACTCAGCAGATTATTCCTGTGAATAAAGCTCTTCCCCACCCAGACTATAATCCTCTGGATCACACCAATGACATCATGCTATTAAAGCTGGAGAGTAAGGCCAAGGGGACTAGAGATGTGAGGCCCCTCAAGTTGCCTGGGCCC…
ENSMUSG00000024224	Clpsl2	-0.291258462071431	colipase-like 2 [Source:MGI Symbol;Acc:MGI:2685595]	ATGGCATTCACTCAGGCCTTGGTCACCGTCCTGGCTTTGCTTGCTGGGACCCTGCCACACAGACACAGTGAAAACTCACCTCCCAAAAAGGCCAACGGAGACAAGTGTGTCCACCACACTCAGTGCTCCAGTGACTGTTGCCTCATAGACCTGGAGAGAAGCGGAGCCTTCTGCACCCCCAAGTCCCGCATAGGCATGGGGTGCTTGCCACAGACCAAGGGGAGCCTGAACATCATGTGTCCCTGTCGATCTGGCTTGAATTGTCATTCTAAGGACCCCACATGTCCCCGCCGATGTCAAATGATATAG
ENSMUSG00000042282	Gucy2f	-0.08063898820295243	guanylate cyclase 2f [Source:MGI Symbol;Acc:MGI:105119]	ATGTTCCTCGGACCCTGGCCTTTTTCTCGCCTTCTGTCCTGGTTTGCCATTTCCAGCAGACTGTCAGGACAGCATGGCCTCCCTTCCTCCAAGTTCCTGAGATGTTTGTGCCTCTTGGCCCTTTTGCCTCTCCTTCGGTGGGGGCAAGCACTCCCCTACAAGATCGGGGTCATAGGTCCCTGGACATGTGATCCGTTCTTTTCCAAGGCCCTGCCTGAGGTTGCTGCTGCTTTAGCAATTGAGCGAATCAGCCGGGACAAGACATTTGACAGGAGTTACTCCTTCGAATACGTGATTCTTAACGAAGACTGTCAGACTTCAAAGGCCCTCGCCAGTTTCATTTCCCACCAGCAGATGGCCTCAGGATTTGTTGGGCCTGCCAACCCTGGCTTCTGCGAG…
ENSMUSG00000020062	Slc5a8	0.0772883285956775	solute carrier family 5 (iodide transporter), member 8 [Source:MGI Symbol;Acc:MGI:2384916]	ATGGACGCGTCGCGGGACATCGGCAGTTTTGTGGTGTGGGACTACGTGGTGTTCGCAGGCATGCTGCTCATCTCGGCGGCTATAGGCATCTATTACGCCTTCGCGGGGGGCGGCCAGCAGACCTCCAAGGACTTTCTTATGGGCGGTCGCAGTATGTCCGCCGTGCCTGTGGCTCTGTCCCTCACCGCCAGCTTCATGTCCGCTGTCACTGTCCTGGGCACTCCTGCCGAGGTCTACCGTTTTGGGGCGATATTCAGCATCTTTGTCATCACCTACTTTTTTGTAGTGGTTATCAGCGCGGAGGTCTTCCTTCCAGTGTTCTATAGGCTGGGGATCACCAGCACCTACGAGTATTTGGAACTTCGATTTAATCGATGCATTCGTCTCTGTGGCACAATC…
ENSMUSG00000073294	AU022751	-0.7535567447586101	expressed sequence AU022751 [Source:MGI Symbol;Acc:MGI:2147968]	ATGGCCAGCTCTTCGTCTCCAGAGAGGGGGCTGGAGGCGCTCAGAGACACTGACGAGTCCGAAGGTGAAGCTCCGGGGCCTTCGGGGCCCAGAGGCCGAGGTGGTCCCTCGGGGGCAGGCAGCGCGCTGCGTCTCCGGAGCCTCGAAGCCGAAATGGCGGCGGCCTGCGTCACCTCCACGGCCGGTGAGGACCTGGGGACATTTTCTGAGCCTGGGAGTCAACATGGCGACCCTGAGGGTGGCGGTGGCCCAGACCTAGAACTTGGACATGCAAGGCCCATGATGAGAAGCCAGAGAGAGCTCGGCCTGACCCCGAAAGGCGGCGGGAAAGCCGACCAAGGCGGGAAAGGCAGGAAAGGCGGCAGCGGCTCCCCGCCTCACACCAAGAGCAGTAGAAAG…
ENSMUSG00000054498	Olfr308	-0.09860901369008665	olfactory receptor 308 [Source:MGI Symbol;Acc:MGI:3030142]	ATGATCACAGAGAATTGGACTCTAGCCCAAGACTTCCTTCTCTTAGGCTTCCCTGGATCTCAGGTCCTCCAGTTTTCTCTTTTTCTCTTCTTTTTGGTGATGTACCTCCTCACCATTGGTGGTAATATGGCAATCTTGCTATTGGTTAGTACTTCACACCAGTTACAGACGCCCATGTATTTCTTTCTGAGCAACCTGTCATTCTTAGAGATCTGGTACACAACAGCTGCAGTCCCAAAAGCTCTGGCCATTCTGGTGGGGAAGAGTCAATCCATATCATTTTTGGGGTGTCTTTTTCAGATGTACTTGGTTTTCTCATTAGGTTGCACAGAATACTTCCTCTTGGCAGCCATGGCTTATGACCGCTACCTTGCCATCTGTTTTCCTCTACACTACCAG…
ENSMUSG00000044726	Erich5	0.029958695490434197	glutamate rich 5 [Source:MGI Symbol;Acc:MGI:2447772]	ATGGGCTGCTCCAGCAGCGCCCTCAACAAAGCGGGCGACAGCAGCAGGTTCGGCAGCGGAGTAACTTCGAATGAGAATTCTTCCACTGTAGAACATAACAAGTTCTGTGTAGACCAACCTAAACCATGTACACCAGGAGGAGAAGCTGCCTTTCATGGCAACACACAAAGGGAAAGCCATCCTTCACTCGAGAGGCCCAAGGCTTCAGTGGTGCCTACAGCAAATGGTGTTAAATCCTACCATCAACCATCTCTGGCAAATGATGAGACCCCTGGAAAGGAAGCCACAGATCACTCAAGACCCACAAAGAAGATTGAGCCTCTAGTGCAAGGCGGGGAGTGTGAGCAACCTCAGCCAGGAGGCAAAGATGATATGTTGGGAACTGAGGAAGTGAAGAAA…
ENSMUSG00000022860	Chodl	-0.23909274946555711	chondrolectin [Source:MGI Symbol;Acc:MGI:2179069]	ATGATCCGCATCGCCTCACTCTTGCTGGGAGCTGCGCTGCTCTGTGCCCAGGGAGCCTTTGCCCGAAGGGTGGTCAGTGGTCAAAAGGTGTGTTTTGCTGATGTGAAACATCCCTGCTACAAAATGGCGTACTTCCATGAACTGTCTAGCCGGGTGAGCTTCCAGGAAGCAAGGCTGGCTTGTGAAAGTGAAGGGGGTGTCCTCCTGAGTCTTGAGAATGAAGCTGAACAGAAGTTAATAGAGAGCATGCTTCAGAACCTGACAAAACCCGGAACAGGTATTTCAGATGGTGACTTCTGGATAGGACTTTTGAGAAGCGGAGATGGCCAAACATCGGGTGCCTGCCCAGATCTCTACCAGTGGTCTGATGGAAGCAGCTCCCAGTTCCGAAACTGGTAC…
ENSMUSG00000049420	Tmem200a	-0.23034682769857903	transmembrane protein 200A [Source:MGI Symbol;Acc:MGI:1924470]	ATGATAGCCACTGGTGGGGTCATCACCGGCCTGGCGGCCTTGAAGCGGCAGGACTCTGCCAGGTCTCAGCAACACATTAACCTCAGCCCACTGCCTGCTACCCAGGATCAGAAACCCGTCAGACGGCGCCCACGAGCAGATGTTGTGGTGGTCCGTGGGAAAATCCGACTTTATTCTCCATCTGGCTTTTTCCTCATTCTGGGAGTGCTGGTGTCCATCATAGGAATCGCCATGGCAGTCCTTGGATATTGGCCCCAGAAGGAGCACTTCATTGACGCAGAGACCACGCTGTCCACCAATGAGACCCAAGTGGTTCGGAACCAGGGCGGTGTGGTGGTGCGCTTCTTTGAGCAGCATCTACATTCCGATAAGATGAAGATGCTTGGCCCGTTCACCATG…
ENSMUSG00000055610	Olfr307	-0.41764904453985474	olfactory receptor 307 [Source:MGI Symbol;Acc:MGI:3030141]	ATGCCCAATATCACTGCCTTCACTGGATTTCTCCTGACGGCGTTCTTTGACAGCCAGGAGTTACAGACTTTATGGGGAGTGTTCTTCCTTGGGATATACCTGGAAGCCCTAATGAGTAACCTCATCATCATCACTCTTATCACCCTTGACCTACAGCTCCAAACACCCATGTACTTTTTCCTGAAAAATTTGTCCCTGTTGGATGTCTTTTTTGTTTCTGTTCCAATCCCAAAGTTCGTTGTTAATAGCCTAATTCATAATAATTCTATTTCCGTTCTGGCTTGTGCCTTCCAGGTATTTTTAATGACTTCTTTTTCATCAGGAGAAGTATTTGTCCTGACTGCCATGTCCTATGACCGCTATGTTGCCATTTGTTTTCCCCTGAACTATGGTGCCATC…
ENSMUSG00000078889	Gm14288	0.22552342456682475	predicted gene 14288 [Source:MGI Symbol;Acc:MGI:3706570]	ATGGATTTACTCACCTATGATGACGTGCATGTGAACTTCACTCAGGAAGAGTGGGCTTTGCTGGATGCTTCTCAGAAGAGTCTCTACAAAGGTGTGATGGTAGAGACCTATAGGAATCTCACAGCTATAGGTTACAGTTGGGAAGAACATACAATTGAAGACCATTTCCAAACTTCTAGAAGTCATGGAAGGCATGAAAGAAGTTCTTCTGCAGAGCAACACTCTGAGTTTATTCAATGTGGTAAAGCCTTTGCATATCAGTCATAG
ENSMUSG00000051706	Olfr1325	-0.14523288576948054	olfactory receptor 1325 [Source:MGI Symbol;Acc:MGI:3031159]	ATGAAGAAAATGAATTACCAGGAAATTGGAAACTATACCAAAGTGACTGAATTCATTCTTGTGGGACTCTCTAGGCATCCCACATCCCAGAGTGTTGTCTTCTGGACACTGATGTTTCTCTATATAGTTACTTTGGCAGGAAACAGTTTGATTATTTTCCTAGTAGGAGGCAACTCTCAATTGCACACACCAATGTATTTCTTTCTTGGTAACTTGTCTTTACTGGATCTTCTATTTTCCACCAGTGTTGTACCCTTGATCATGGTGAATTCATTGTATAACTTCTCCACTATCTCCTACAGCTCCTGTTTTACCCAGCTTGCTTTCAGGGCTTTCTTAGCACTGGCCGAATGTTTTCTGCTTGCCATTATGGCTTATGATAGATTTGTAGCTATTTCA…
ENSMUSG00000024976	Shoc2	-0.5167122328617667	Shoc2, leucine rich repeat scaffold protein [Source:MGI Symbol;Acc:MGI:1927197]	ATGAGTAGTAGTTTAGGAAAAGAAAAAGACTCTAAAGAGAAAGACCCCAAAGTACCGTCTGCCAAGGAAAGAGAAAAGGAGTCAAAAGCCTCAGGAGGCTTTGGGAAAGAGAGCAAAGAAAAGGAACCTAAAGCCAAAGGGAAAGACGCCAAAGATGGAAAGAAGGAGTCCAGCGCTGCCCAGCCAGGTGTGGCTTTTTCAGTCGACAATACCATCAAACGGCCAAATCCAGCACCCGGCACTAGAAAAAAGTCCAGCAATGCTGAGGTCATTAAGGAGCTTAACAAATGCCGGGAGGAGAACTCAATGCGGTTGGACTTGTCCAAGAGGTCTATACATATACTGCCACCATCAGTCAAAGAGTTGACTCAACTCACAGAACTTTATTTATACAGTAAC…
ENSMUSG00000033055	Ankrd54	-0.2215975733157066	ankyrin repeat domain 54 [Source:MGI Symbol;Acc:MGI:2444209]	ATGGCAGCCACCGGCGGGGGCGCGGACGACGAGTCGCGATCCGGCCGCTCGAGCTCGGACGGCGAGTGCGCGGTGGCGCCGGAGCCTTTGGCGGAAGCCGGAGGCCTGGTGTCTTTCGCGGACTTCGGCGTTTCGCTGGGCAGCGGCGCCGGCCTCCCGGGCCGGTCGGTGGGCAGGGCCCAGTCCTCGCTGCGCTACCTCCAGGTCCTGTGGCAGCAGGACGTCGAGCCTCGCGACGAACTGCGTTGCAAGATTCCCGCCGGGCGGTTGAGGCGTGCCGCCAGGCCCCACCGTCGGCTCGGGCCCACCGGCAAGGAGGTACACGCTCTGAAGAGGCTGAGGGACTCTGCCAATGCCAACGACGTAGAAACAGTGCAGCAGCTGCTGGAAGATGGGGCG…
ENSMUSG00000073295	Nudt11	-0.20597297866190808	nudix (nucleoside diphosphate linked moiety X)-type motif 11 [Source:MGI Symbol;Acc:MGI:1930957]	ATGAAGTGCAAGCCGAACCAGACGCGGACCTACGACCCCGAGGGCTTCAAGAAGCGCGCCGCGTGCCTGTGCTTCCGCAGCGAGCGCGAGGACGAGGTGCTGCTGGTGAGCAGCAGCCGCTACCCCGACCGCTGGATCGTGCCGGGAGGGGGCATGGAGCCCGAGGAGGAGCCGGACGGCGCGGCGGTGCGCGAGGTGTACGAGGAGGCGGGAGTCAAGGGGAAGTTGGGCCGCTTGCTGGGCGTCTTCGAGCAGAACCAGGACCGCAAGCACCGGACCTACGTGTTCGTGCTCACCGTCACCGAGCTGCTGGAGGATTGGGAAGACTCGGTCAGCATCGGCAGGAAGCGCGAGTGGTTCAAGATCGAAGATGCCATCAAGGTCCTGCAGTGCCACAAG…
ENSMUSG00000079534	Gm5640	-0.3471681418420641	predicted gene 5640 [Source:MGI Symbol;Acc:MGI:3645126]	ATGGACTCGTCAGAATATGTACTCTGTGGCTGGAAGAGCCAGCTGTGTCCTGCAAGGGTGTTGTCCAGACCCAGGACCCCAGCCCATAGTAAGAGGAGAGGGGTGCCCTTCCTGGAGGTCCAAATACTGCCTGTGGGTGAGAAGAGGAGAGTGAGGAGCTCCAAGGTGAGGCCCCTAGCCAAGTCTGAAATCATAAGCATCAACTCCTTGGCAGGAAAGGAGTCACGGGGCAGGGGCTCGCCAGGGCAGACCAGGGCATCCAGGAGAGCCCTCAAGGTGGCCCTGGATGGTCTGGGTGAGGGAAGCAGCTTCTTTCAAGGAGGAAGAGCAGGTAGCCGAAGAACCAGCACCTTGGCTCCAAAGGTTCCAAAAGAGCAGGCCAGCTCCAGCAGCTCCAGC…
ENSMUSG00000032012	Nectin1	0.09392867860933177	nectin cell adhesion molecule 1 [Source:MGI Symbol;Acc:MGI:1926483]	ATGGCTCGGATGGGGCTTGCGGGCGCCGCTGGACGCTGGTGGGGACTCGCTCTCGGCTTGACCGCCTTCTTCCTCCCAGGCACTCACACGCAGGTGGTGCAGGTGAACGACTCCATGTATGGCTTCATCGGCACAGATGTGGTACTGCACTGTAGCTTTGCCAACCCACTGCCCAGTGTGAAAATCACCCAGGTCACATGGCAGAAGGCCTCCAATGGCTCCAAACAGAACATGGCCATCTACAACCCGACTATGGGTGTGTCCGTGCTGCCTCCCTACGAGAAACGAGTGGAGTTCCTGCGACCCTCCTTCATCGACGGCACCATCCGCCTCTCCGGTCTGGAGCTGGAGGACGAGGGCATGTACATCTGTGAATTTGCCACCTTCCCTACGGGCAAC…
ENSMUSG00000022109	Med4	-0.35389398640538283	mediator complex subunit 4 [Source:MGI Symbol;Acc:MGI:1914631]	ATGGCGGCTTCTTCAAGTGGTGAGAAGGAAAAGGAGCGGATGGGAGGCGTTTCGGGAATGGCCGGCCTTGGCAGTACGCGAGAGCGGCTTCTGTCTGCGCTGGAAGATCTGGAGGTCTTGTCGAGGGAACTCATAGAAATGCTTGCAATTTCAAGAAATCAGAAGCTATTACAGCTGGAAGAGGAAAACCAGGTCTTGGAGTTGCTAATTCACCGAGATGGGGACTTCCAAGAACTAATGAAATTAGCACTTAATCAGGGAAAAGTTCACCACGAAATGCAGGCTTTAGAGAAAGAAGTAGAGAAGAGAGACAGTGATATTCAGCAGCTGCAGAAACAGCTGAAAGAGGCCGAGCAGATCCTGGCAACAGCTGTTTACCAGGCAAAGGAAAAACTCAAG…
ENSMUSG00000055571	Olfr305	0.007817154738268075	olfactory receptor 305 [Source:MGI Symbol;Acc:MGI:3030139]	ATGCCCAATGTCACTGCAGTAACTGGATTCATACTTATGGGTTTCTCTGATATCCATGAGCTACAGATTCTATGTGGAGTGTTATTTTTAGTACTATACCTGGGAATTTTAATGAGTAACCTGCTCATCATCATTCTCATCACTGTGGATCTGAAGCTCCAAACACCCATGTACTTCTTCTTGAAGAATTTATCCCTTTTGGATGTCTTTCTTGTGTCTGTTACAATTCCAAATTTCTTTGTCAATAGCCTTATGCACAAAAATTCCATTTCCATACTTGGATGTGCATTTCAGGTATTTTTCATGGCTCTCCTTGGATCAGGAGAAGTATTTGTTCTTACTACAATGTCATATGATCGCTATGTTGCCATTTGCAGTCCCCTACATTATGAGGTCATT…
ENSMUSG00000004127	Trmt10a	-0.1549542078114526	tRNA methyltransferase 10A [Source:MGI Symbol;Acc:MGI:1920421]	ATGAATATGTCATCTGAAATGCTGCCAGCATCCATCGAGTCTACTAATGTGGAGGAAAAGCTGGGTACGAGTGACGGTGAAGAGGAGAGACAGGAGCCTAGAGTGGATGCAGGGGCTGAGCCAATATCTAAACGGCAACTGAAGAAGCTGATGAAACAAAAACAGTGGGAAGAGCAACGTGAACAGCGCAAGGAGAAACGAAAAGAAAAACGGAAGAGAAAGAAATTAGAACGACGCCAGCTGGAGTCCAACTCAGATGGCAACGACAGGAAGCGCGTTCGGAGAGATGTTGCTCGCAGCAGCCTCCGCCTGGTCATCGACTGTAGCTTTGATGACTTGATGGTGTTAAAGGATATTAAGAAACTTCATAAACAGATTCAACGATGTTATGCAGAAAAC…
ENSMUSG00000007207	Stx1a	0.3235371112773633	syntaxin 1A (brain) [Source:MGI Symbol;Acc:MGI:109355]	ATGAAGGACCGAACCCAGGAGCTCCGCACGGCCAAGGACAGCGATGACGACGACGATGTCACTGTCACTGTGGACCGAGACCGCTTCATGGATGAATTCTTTGAACAGGTGGAAGAGATCCGGGGCTTTATTGACAAGATTGCCGAAAACGTGGAGGAGGTGAAGCGGAAACACAGCGCCATCCTGGCCTCCCCGAACCCCGATGAGAAGACAAAGGAGGAACTGGAGGAGCTCATGTCGGACATTAAGAAGACAGCGAACAAAGTTCGCTCCAAGCTAAAGAGCATTGAGCAGAGCATCGAGCAGGAGGAAGGTCTGAACCGCTCATCAGCCGACCTGAGGATCCGGAAGACGCAGCACTCCACGCTGTCCCGAAAGTTTGTGGAGGTCATGTCCGAG…
ENSMUSG00000062426	Olfr304	-0.3204409113729453	olfactory receptor 304 [Source:MGI Symbol;Acc:MGI:3030138]	ATGCCCAATGACACTAGAGTAACAGGGTTCATCCTTATGGGATTCTCAGCTGCTCCTGAACTACAGACTGTATGTGGGCTGTTCTTTCTGGTAATGTACCTAGCAGTCATAATGAGTAACCTGCTCATCATCACGGTCATCACTCTGGATCTGAAACTCCAAACACCCATGTACTTTTTCCTAAAGAATTTGTCCCTGTTGGATGTCTTCCTTGTGTCCATCCCAATCCCAAAGTTCATCATCAATAACCTAACTCACAACAATTACATTTCGATTCTGGGTTGTGCCTTTCAGATACTTTTAATGACTTCGTTCTCAGCAGGTGAGATATTTGTACTGACTGCAATGTCTTATGACCGCTATGTTGCCATTTGCTCTCCTCTGTGTTATGAGGCAATC…
ENSMUSG00000031512	Tex29	0.15060985216177583	testis expressed 29 [Source:MGI Symbol;Acc:MGI:1922778]	ATGAATAATGGAATTAACAGACCCGCGGTTCAATCTGGCAGACTCCCAGTGCACCCCACCCCCATGCCCGCCTTGTTTTTTGCCAAGTCAGTGCTGTGTCTGTGCCTTGCAGTGTGTGACATCCCTCTGTATGACATCTGTGACTACAATGTCACCAGGGAGCGCTGCAGGAGTCTCGACTGCTGTTTCTACAGGGGCGTCTGCTACGAGAAAGCTGTTCCCATTTATGTACAGGTGTTCTTCACTCTGATTTGGTTCGTGGCAGGGGCCTTCATCATTGCCGTCATTTATAGGGTTATACAGGGGACTAAAAAAGAGAAGAAGCCTTTACTCCCAGAGGACTCACAGGTTGAAATACTGAAGTCTCCCACTCCAGAACTCATTCCAGAACCCATTCCA…
ENSMUSG00000022439	Parvg	0.034418874696217655	parvin, gamma [Source:MGI Symbol;Acc:MGI:2158329]	ATGGATTGGGGAACACGTCTGGGTGGCTTTGGCCTTCAGCCTGGTCCACCCCATCTACATCTGGGAGAGTCTGGTCTGTTTTTTACCTGTCTTGGATTCAGGGACCCTGAAGGGATGGATGGACGGCCACTTCACCCCACTGGGAAGGCAAGGAAGAAGATGGAGTTAGAGTTCCTCTATGACCTGTTGCAGCTCCCAAAGGAGGTAGCTCAGCCCACGGAGGAAGAGCTTCCACGAGGAGGAAAGAAGAAATATCTGTCACCCAATTCCAAGAGGAACCCCAAGTTTGAAGAACTGCAGAAGGTGCTGATGGAATGGATCAACACCACACTCCTCCCGGAGCACATCGTGGTCCGCAGCCTGGAGGAAGACATGTTTGATGGACTTATTCTGCACCAC…
[truncated: 20,548 more rows]
