# Supplementary material for: iCodon: ideal codon design for customized gene expression
Source: Research Square preprint supplement (doi:10.21203/rs.3.rs-598844/v1), 2021-06-21
Supplement: Supplementary file 4 [file ba64c9dfe70daa4b697fcd8e.csv]

ensembl_gene_id	external_gene_name	predicted_mRNA_stability	description	coding
ENSXETG00000012456	XB5829846 [provisional:mfsd1]	0.3084026931094489	provisional ortholog of major facilitator superfamily domain containing 1 [Source:Xenbase;Acc:XB-GENE-5829847]	ATGGCTGTGGCTGCCGAGAAAGCATATTACCGTTTTGTGGTTCTATTCTTCAACTGCCTGCTCACTTTCGGTTCTTACTTCTGCTTCGATATACCCAGTGTTCTGCAGGACCAGTTTCAGGGGGATTTAAACTGTACCAATGCAAGCCAGCCTAACAGCACGCACACTGGGTGCGTGGAAGGGCTAGGAATGAGCCCTGAACAGTACAATCTGCTCTATGCAATCTATGCTTGGACTAATGCCCTGGTAGTGATTGTGGCTGGATTTCTCATCGACAAGCTGGGAAACCGATTCGGCCTGTTTCTGTTCTCCTTTCTAACTGTCCTGGGCTCAACTATATTTGCATTGGGATCCCACTTTAAAGGCACACCCTACCTGCTGCCACTTATGCTCACCGGA…
ENSXETG00000023332	galnt2	0.17998980730877898	polypeptide N-acetylgalactosaminyltransferase 2 [Source:Xenbase;Acc:XB-GENE-980077]	ATGAGAAGGAAATCTAGAATCCTGCTGTGCTTCGCTTTCCTCTGGCTACTTGGCATTGCCTATTACGTGTACTCTGGAACCAATGGGAGCAGCCGGAAGGAAGACTGGAATGAAATTAATCCAGTTAAAAAAAGAGATCCTCACAATACCAATGGTGAAGAACAGAATCTAGAGACTCTGCCTCCAGGTAAAGTTGTTTTTAATATGTTGAATATAGATTTATGCTCTACTGTAGTACGACCTGGCCAGGATGCCTATGCACGTAACAAGTTTAACCAAGTTGAAAGTGATAAACTCCTGATGGACAGAAGTGTTCCTGACACGAGACATGAACAATGTCGGAAAAAAACGTGGAGAGTTGATTTACCAGCAACCAGTGTTGTTATCACATTTCATAAT…
ENSXETG00000024002	b4galt5	-0.2337594004736862	UDP-Gal:betaGlcNAc beta 1,4- galactosyltransferase, polypeptide 5 [Source:Xenbase;Acc:XB-GENE-982971]	ATGCAAGATGGTAGAATAAAGCATTTTCATGGGCTTAAAGGGGTTAGTTCACCTTTACCTTTCAGCATGGTACAAGCAGTGATATCCCAAGACAGTGTGTTAAATAAAGAATGTGGCTTTGATTTCTCTGCAGTTAACACTTACCTGTTCATGATGCAAGCCCGTGGGATCATTATTCGAGAGAACATGCGGACAATCGGGGCTCAGGTGTACGAGCAAGTAGTCCGCAGTGCATATGCCCGGAGGAACAGCAGCATCAATGATACAGATTACGGACTTGATTTCAATCACAGTGAATCCTATCTCCAAACAACCACGTTTCTACCTGAAGATTTCACCTACCTGCCCAACCAATCTTGCCCCGAACGACTCCCATCAATGAAAGGGCAAATGGAAGTG…
ENSXETG00000012950	cbln1	-0.1619572591292801	cerebellin 1 precursor [Source:Xenbase;Acc:XB-GENE-978378]	ATGTGGGGTTTTGAGCTGCTGCTTGGGGCGCTGTACCTGCTCGGGCTCACCTGTGGCCAGAACGAAACGGAACCTATCCTGCTGGAGGGCAAGTGTCTAGTGGTTTGTGACTCCAACCCTATGTCTGACCCCACTGGCACAGCGCTGGGCATTTCGGTGCGCTCGGGCAGTGCCAAGGTGGCATTCTCTGCTATTCGAAGCACCCATCACGAGCCATCGGAAATGAGTAACCGGACAATGATCATCTACTTCGATCAGACTTTGGTCAATATTGGAAGCAGTTTTGACTCAGAACGAAGCACTTTTACATCACCAAGAAAGGGGATTTACAGTTTTAATTTCCACGTGGTGAAAGTATATAACCGGCAAACCATACAGGTTAGTTTAATGTTAAATGGT…
ENSXETG00000015756	thap5	-0.02672192039506341	THAP domain containing 5 [Source:Xenbase;Acc:XB-GENE-491348]	ATGACTCGATACTGCGCAGCCACGTGTTGTAAGAACCGGGGAGGGCAGGCGGCTAGCACCAAGCACAAACTCTCATTTTACCCGTTTCCTTTGCATGACAGGGGAAGACTTAAAGAATGGCTGTGTAATATGAAACAGAACAAATGGTATCCCACGAAGCATCAGGTCTTGTGCAGTGATCATTTTACCCCTGATTCCTTCAGTATGAGATGGGGTATTCGGTATCTGAAACCTAATGCTATACCTACTATATTCTCGTTTACAAATAATTCCCAGGATACATCTGAGTTGGACGTTTCTACAAAGGAAGGAATGCAGGATGATGCAGAAATTGATACAGACACTTTGATGTCACATGTTTTTTGTCCCAATGTGACAAACAAATTGAATCATGGTTTT…
ENSXETG00000021725	arhgap4	0.12213184236087513	Rho GTPase activating protein 4 [Source:Xenbase;Acc:XB-GENE-5965169]	ATGGCATCTCATGGAAAGCCCCGGAGGGACCGGGCATCGGAGTATGAGAACCAGATCAAAGAAATCCGGGCTCAACTGACTGACCAGGTCAAATGCCTGGACACGCAAGTGGACTTCCGCCAGCAGCTTCTGCAGGACATGAGCGAATTCCTACGCAGAAAGGCAGAGATCAATCTGGAGTACTCCCGGAGTCTTGAGAAACTGAGTGACCGCTTCTCTTCAAAAATCCGCAATTCCAAGGATCACCATATCTTCAGGAAAGAACAGAACCTGCTGTCTCCTGTTAATTGCTGGTATACAATTATGAATCATACAAGACAGGAAAGTCGGGATCATGGAGCTCTTAGCGACGTGTACACTTCACATCTCATCCCACGCCTTGCACATATCGGAGAGGAT…
ENSXETG00000026530	man2a1	0.23946318302493105	mannosidase, alpha, class 2A, member 1 [Source:Xenbase;Acc:XB-GENE-961025]	ATGAAGCTGAGCCGGCAGATCACGGTTCTCGGCAGTGCTATATTCTGTGTGGTTATCTTCTCCCTTTACCTGATGTTGGACAGGGGGCAGTTTGACCAGCCCAAGAGCCCCCGCCGGGAAGGGGCTCTACCCAAGGGTCAGCTGTCAATATTACAAGACAAAATAGATCACCTAGAGCGCCTTTTAGCAGAAAATAATGAGATCATTTCAAATATAAGAGACTCTGTAATCAACCTAAGTGAGTCTGTGAAAGATGGCCAAAAGAACTCAGACTCTCAAAATTTTAGCCGAGGTTCATCCTCTCAGCTTGAGCCATCAGCCCCTGCTTTCCTTCCAATAAATAATGAGGACTGTCAGTTTGCATCTGTAACTGGAGGCCACAAATCCAATGTTCAGATG…
ENSXETG00000038056	art1	0.2879753149017493	SH3 and PX domains 2B [Source:NCBI gene;Acc:549321]	ATGCCCAGGAGAAGCATCGTGCAAGTCAGTGTGCAGGACGTGCAAAAGCGGCGCAGTCCCAACAAGCATTATATGCAAATTTTGGACAAGTTTCCAGTTGAAGGCGGTCAGAAGGATCCAAAACAGCGAATTATCCCTTTCTTGCCAGGTAAAATTCTCTTCAGAAGGAGCCACATACGTGATGTTGCAGTGAGGAGACTGATCCCAATAGATGAATACTGCAAGGCACTTATCCGGCTGCCAGCATATATCTCCCAGTGTGATGAAGTCCTGCAGTTTTTCGAAGCCAGAGTAGAAGATTTCAACCCACCTAAAGAGGAACCTATTGGAAGGAAGAAGCTGGGTGGCGACTCTTCCTCATCTGATGCTTTAGTCCTTGATCAGTATGTTGTGGTGGCA…
ENSXETG00000015752	dnajb9	-0.028641624055478238	DnaJ heat shock protein family (Hsp40) member B9 [Source:Xenbase;Acc:XB-GENE-493656]	ATGGCATCAGCACAATCAGTCATCACATTTGCTGTTTGTATTTTGCTGATATCAGAAATAATTCTGGCAAAAAAGACTTATTATGACATTTTGGGAGTTCCAAAAAATGCCTCCGAGCGACAGATCAAAAAAGCTTTTCACAAACTTGCAATGAAGTATCACCCTGACAAGAATAAAAGCCCTGATGCTGAGGCAAAATTTCGAGAAATAGCTGAAGCTTATGAGACGCTTTCAGATGAAAGTAAACGGAAGGAGTATGATCAGTTCGGCCATGATGCCTTTGCAAATGCTGGAAAAGGAAGCAGTGACCAACATTTCCACAAACATTTTAACTTCAACTTTGATGATTTATTTAAAGACTTTGACTTTTTTGGTGAAACCCAAAGTAGTAGATCGAAA…
ENSXETG00000008073	lrp8	0.2409080481371327	LDL receptor related protein 8 [Source:Xenbase;Acc:XB-GENE-980035]	ATGAGGATAGGTTGCTGCTGCGGGGCAATGCCCGGCCTCCTCTTATTGCTAGTGTTGGGGACGCGAGGTGGCAGAGGGCCAACAACCTCAGACTGTGAGGAGGGCCAGTTTCAGTGCAGGAACCAGCGATGTATACCCAGCGTGTGGAGATGTGATGAAGATGATGACTGTGCTGATAACAGCGATGAAGATGACTGCCCTAAAACAACTTGTGGGGAAGATGAGTTCACATGTAACAGTGGTCACTGTATATCTGCACGTTGGAAGTGTGATGGGGAAGAGGAGTGCCCTGACAAAAGTGATGAGTCTGAGGCCACTTGCAGTAGTGCAAAGCAGGTATGTGCTGCACAGAAGTTCAGCTGTGGAGGACCAAGCAATAAATGTATCCCAGTATCCTGG…
ENSXETG00000039606	NA	0.7456808204498961	NA	ATGGGAAAGACCAAAGAGCTGTCCAAGGATGTCAGAGACAAAATTGTAGACCTGCACAAGGCTGGAATGGGCTACAAAACCATTAGCAAGAAGCTGGGAGAGAAGGTGACAACTGTTGGTGCGATTGTTCGAAAATGGAAGGAGCACAAAATGACCATCAATCGACCTCGCTCTGGGGCTCCACTCAAGATCTCACCTCGTAGGGTGTCAATGATTCTGAGAAAGGTGAAAAAGCATCCTAGAACTACACGGGAGGAGTTAGTTAATGACCTCAAATTAGCAGGGACCACAGTCACCAAGAAAACCATTGGAAACACATTACACCGCAATGGATTAAAATCCTGCAGGGCTCGCAAGGTCCCCCTGCTCAAGAAGGCACATGTGCAGGCCCATCTGAAG…
ENSXETG00000019578	vav2	0.07073289594700513	vav guanine nucleotide exchange factor 2 [Source:Xenbase;Acc:XB-GENE-6067166]	ATGACCGAGGGTTGGCGGCAGTGCGGACGCTGGCTCATAGACTGCAAAGTTCTCCCAGTGGACCACCGGGTCGTGTGGCCTTCTGCCGTGGTCTTTGACCTGGCCCAAGCTCTGCGGGATGGAGTCCTGCTCTGTCAGCTGCTCCACAACCTGTCCCCTGGATCTATCGACCTCAAGGACATCAACTTCAGGCCCCAGATGTCACAGTTCTTGTGCCTGAAGAACATTCGAACATTCCTCAAAGTTTGCCACGACAAGTTTGGATTACGGAACTGCGATCTCTTCGACCCCTTCGACCTGTTCGACGTCCGGGATTTCGGAAAGGTGATTGCCGCTTTGTCCAAGGTGTCCTACCACAACATTGCCCAAACCAAGGGGATTCGGCCTTTCCCTTCTGAG…
ENSXETG00000027596	aimp2	0.004020336242408357	aminoacyl tRNA synthetase complex-interacting multifunctional protein 2 [Source:Xenbase;Acc:XB-GENE-998779]	ATGCCCATGTACAGAATGCAGCCCTATTGTGGTGGGGAGATCCAGGTGGACTTGCCCACATGCATGTATAGGTTGCCCAATGTGCATCAGGCCGTGTCGGAAAACCTTGAGCAGGCTGCTGACCCAGCAATCCAGGCGCTGGAATCCAGACAAGAGGATATCCTAAAGAGACTGTATGAATTGAAAGCTGCTGTAGATGGACTGTCAAAGATGATTCAAACCCCTGATGCAGATCTTGATGTGACAGATATTATTCAGACAGATGAGCAGTCGGCTCCGGGACCTGTGGTTGCAGATCTGGACTCTGTACTTGGGAAGGAATATGGAGCTCTCAGGGACATTGTGATCAATGCAAACCCTTCTTTGCCTCCACTGTCCCTGCTGATATTGCACAGCTTG…
ENSXETG00000013833	rasa3	0.13475113143293158	RAS p21 protein activator 3 [Source:Xenbase;Acc:XB-GENE-920756]	ATGGCTGTGGAGGAAGAAGGAATACGGGTGTTCCAGAGTGTCAAGATCAAAATAGGTGAAGCAAAAAATCTGCCATCTTATCCTGGGCCGAACAAGATGCGAGACTGCTTCTGTACTGTAAACCTGGACCAGGAGGAGGTGTTCAGGACCAAGATAGTCGAGAAATCACTTTGCCCATTCTATGGAGAAGACTTTTACTGTGAGATCCCTCGGAGCTTTCGCCATCTATCCTTTTACATATTTGACAGAGATGTTTTCCGGAGGGATTCAATCATGGGCAAAGTCTCAATTTTAAAAGAAGATCTGCAGCAGTACAATAACAGGGACACTTGGTTCCAGGTTCAGCACGTGGATGCTGATTCAGAGGTTCAGGGGAAAGTACACCTGGAGCTGAGGCTA…
ENSXETG00000038940	NA	0.15915574704956362	uncharacterized LOC100498497 [Source:NCBI gene;Acc:100498497]	ATGGCTTTAGTCAGTGGTAATAGCACTAAGGGAGAAATGGTCAGCACCTGGTTGGTTAGTTATATTAAAAATCATGGGGGACCATATGAAATCCCTCAAGAATGTAAAAATTCATGGGATTTAATGAAAGATTTTATAGCTGACAGTGTTTTTGATAAGAAAACTAAGGAAGCAAAACGCAAAGGACTTATCATACAGGGATTGGTCTCCTGCTGTTTAAAAATGGCAGAAATTATTAAACAAAAGGAGACTGATATCACAGAACAGGCAGATAAGTATAAGACTTTACTGAGAGAGTCAAATGAAAAGATCTCAGAGTTAAGGTTACATGCCATAACCACTGGGGAGGCATTGCTTGAGAAGGCCAATCTATGTGACCACTTAACCGGTGTAAATGAC…
ENSXETG00000032850	lrrn3	0.04791344226178737	leucine rich repeat neuronal 3 [Source:NCBI gene;Acc:779981]	ATGAGGGATATGTTCCTCAGAATACACTTGTTACTTGGATTAGCTATTGCTACCCATGGGCACACTACACCAAAAAAGATGGATTGTCCTCATTCATGTTCATGTGAAATAAGGCCCTGGTTTACTCCAAAATCTATTTATATTGAGGCTCTTACAGTGGATTGCAATGCATTAGACCTTTACAGTGTTCCAGACAAACTACCTGCAAAAACACAGATCCTACTCTTACAAGCAAACAACATTGAAGAAATAAAAAACACTGATCATTTTCCTGTTAATCTAACAGGCTTGGATTTGTCACAAAACAATTTATCACTGATTGCAAATATCAATTTTACAAACATGCATCAAATTCTTTCGGTGTACCTTGAAGAAAATAAACTCACTGAACTGATGGAG…
ENSXETG00000007012	grhl1	0.15175863821408128	grainyhead like transcription factor 1 [Source:Xenbase;Acc:XB-GENE-486576]	ATGGAAACCTCAACTGTAATAAATAAGGTATATACTACAGACTGTGGTCACAAACGGCCGGTGTTGGTGCTTCAGAACGATGGGCTGTACCAGCAGAGGAGATCCTACACCAGTGAGGATGAAGCCTGGAAGTCCTTTCTTGAAAACCCCCTCACGGCGGCCACCAAAGCGATGATGAGCATAAATGGAGATGAAGACAGTGCAGCCGCCTTAGGCCTTTTATATGATTATTACAAGGTTCCCAGGGAAAGGAGGCCGTCGGCAGCAAAACAGGAGCATGATCATGCGGATCAGGAGCACAACAAAAGGAATGGTTTGCCTCAGATCAATGAACAAGCCCTGCTTTCAGAGAACAGAGTGCAGGTACTGAAAACAGTGCCCTTTAACATTGTGGTACCC…
ENSXETG00000021460	srek1	-0.16537351975008202	splicing regulatory glutamic acid/lysine-rich protein 1 [Source:Xenbase;Acc:XB-GENE-491758]	ATGAGCCCCGGGCAGACCACGGTCATTCAGGTTACAAACCTTTCTGCGGCTGTTACAAGCGATCAAATGCGGACTCTCTTCTCCTTCCTGGGGGATATAGAAGAACTGAGGCTCTATCCGCCTGACAATGCTCCTCTTGCATTTTCCTCCAAAGTTTGTTATGTTAAGTATCGCGAGCCTTCGAGCGTCGGCGTGGCCCAGCACCTAACTAACACGGTTTTTATTGACAGAGCTCTGATAGTTGTGCCCTGTGCAGAAGGTAAAATCCCTGAAGAAACTAAGGCGCTTTCTCTTCTGGCTCCTGCTCCATCATTGTCAAGCTTGCTTCCTGGGGCTGGCCTGCTGCCCATTCCGGCACCAACTCCAACCCCTCCTATTGCATCTTCCCTTGCTTCGGTG…
ENSXETG00000039936	gphb5	0.3659580832097069	glycoprotein hormone beta 5 [Source:NCBI gene;Acc:100494400]	ATGAACAAGAAGAGTGTAATGGTCCCTGTCCTGCTGCTTCTGTGTTGCGGCAACACTGCAGGTTCCAATATAAGCCTGAGAACTTTCATTGGATGTGCTGTGAGGGAATTCACATTCTTAGCAAAGAAACCAGGCTGCAAAGGCCTGCGTGTTACTACTGATGCCTGCTGGGGGCGCTGTGAGACTTGGGAGAAGCCAGTCCTAGATCCTCCTTACATAGAAGCCCACCACAGAGTCTGCACCTACAATGAAACCAAACTGGTTACAGTAAAACTGCCCAACTGCAGCCCAGACATTGACCCATTCTTTACCTACCCTGTTGCCGTTAGATGTGACTGTGACATTTGTTCGACATCAACAACAGAGTGTGTGACGTTTTAA
ENSXETG00000041335	CCR8	-0.11623992844210579	C-C motif chemokine receptor 8 [Source:HGNC Symbol;Acc:HGNC:1609]	ATGTTTTTTGGCAGTATACGATTCAACATACTAGATACAACAAATGACTATATCTATTCAGAGTCAACTGAAACTTTTGAGAATTCCAGAACTTTTACTTTTCACTTTCTGCCTGTACTTTATTGCTTGGCATTTACCTTTGGACTGGTGGGAAATATTTTGGTCATCTTCGTACTGGTATATTGTAAGAAATTACGAACAACCACTGATGTTTATCTCTTTAACATGGCAGTCTCAGACCTATTGTTTGTTGTCTCACTTCCATTTATTGCCTACACAATCATAAATGAATGGATATTTGGAAATATAATGTGTAAAATATTATCTACCATATATTTTGTTGGTTTTTTTAGCAGTATATTCTTTATAACGGTTATGAGTGTAGACCGCTATTTTGCA…
ENSXETG00000003585	rhoj	0.15654471037403658	ras homolog family member J [Source:Xenbase;Acc:XB-GENE-957540]	ATGAATATGAGGGAGGAAAATGACAGCACGGGATGCAGCAGTATGAGCAGCATGAAGAGGATGCTCAAGTGTGTGGTGGTTGGAGACGGCGCAGTTGGCAAAACCTGCCTGTTGATGAGTTATGCCAATGATGCTTTTCCTGAGCAGTACGTTCCCACTGTATTTGACCACTATGCAGTAACAATAACCGTTGGAGGGAAGCAATATCTCCTGGGACTCTATGACACTGCAGGACAGGAAGACTACGATCAACTTAGACCTCTGTCGTACCCCAACACGGACGTGTTCTTAATCTGTTTCTCTGTGGTCAATCCTGCTTCTTATCACAATGTCCATGAAGAATGGGTATCAGAGCTGAGGGCATGTATGCCACATGTTCCTTATGTCCTCATAGGAACA…
ENSXETG00000041180	ddx25	0.1385268355859995	NA	ATGGTAACTTTAAGCAACATATTTTTTTGTCTGACGTTACATTGTTTCCTAATTAAATCACATATTTATTTTCTCTCCAAAACAGGACGAGGCGAAAAGAAACAGGTCAGTTTCAGTTTATTTACTGTTTTATTTTGTACTTTGCCGGGATGCTTTGGGTACCCACTGAGCATTTTCTTTATTGTCATCAATGAGTTCTGTGAAAGGTTTTCCTACTATGGAATGCGAGCGGTGTTGGTGTTGTACTTCAAATATTTTCTGCACTGGGACGATAACCTTGCCACTGTTATATATCACACCTTCGTTGCCATCTGCTACCTGACTCCAATTCTCGGGGCCATAATTGCTGATTCTTGGCTTGGAAAATTCAAGTAA
ENSXETG00000024055	eif2ak1	-0.15409616143656696	eukaryotic translation initiation factor 2 alpha kinase 1 [Source:Xenbase;Acc:XB-GENE-962479]	ATGGCAGGCAGCCCGCGAATGGCAGCCGGCGGAGAACATGGGAACAAAGTCATGAAGAAGTCAGAGGGAATGCCCGAGTTCGAGTTCCCTGCGGAGGGCGACCTGGGGTTTGACGAATCTGATTCTCCTTCTGAATTGAAAGTGCTAAAAGGCCAACGACGGTTCCCAAATGTGACAACAGTCCCCAACCAGCTCCTTCTTGTGTCCCTGGTTGAACACCTGTGCTATGTTCATGAGCAGAATCCCCAGCGTGCCAAGCACCTATTTAAATTGTTATGCCACACTTTCACCAGAATGGGCCTGTTAACCCCTTTTGCCTTCAGCGATGAGTTCAGCACAGTGAGACTGCAGCACAGCACGGCTGTCACTGAACTGCTTAAGGCAGCCAAACGTCACATG…
ENSXETG00000036408	thdl18	-0.3761288505274116	NA	ATGGCACAGCTTCATGGAAGAAGATATGTTCGAGCCTTCATAAGTGGCTTTTTTGTGGCTGTTCCAGTTACTGTGACTTTTCTTGACCGAGTAGCATGCATAGCAAGAGTGGAAGGTGTATCAATGCAGGTATAG
ENSXETG00000025610	asb12.2	0.1830147943358512	ankyrin repeat and SOCS box containing 12 [Source:Xenbase;Acc:XB-GENE-941205]	ATGGATGGCCAAATTGGGCAAATATCCTCTTTTCTGATAACCCCACCAAAGGAGTGGATCTTGCCATGTATGACTAGTTTGAGCCTTCTCTCTTTTGTGGAGAATGTAAAGTTATTTGATCGCTACACAAATAAGAGACCTGCCGTTGGGACTTTGTATTTAACAGCAACTCACCTCATCTATGTGGAGTCTGGAGTTGGAGCCCGTAAGGAAACATGGATCCCACATCATCACATTTCCTTAGTGGAGAAGCTGGCACTTAACACCACTGGCTGTCCACTTGTAATTCGCTGCAAGAACTTTCGAGCAGCACATTTTGTCATCCAGCGAGAAAGAGACTGCCACAAAGTGTACACGTCGTTGCTTAAGCTTTCCCAACCAGCAAAATATGAAGACTTG…
ENSXETG00000023538	ubac2	-0.41246487863731224	UBA domain containing 2 [Source:Xenbase;Acc:XB-GENE-953099]	ATGATTGCCAGTACTGGTTCGAGCGGGCTCTATAAAGCCCCGCTGTCCAAAGGACTCTTACTTATCCCAAGCTTTCTCTCCATTGTGTTGACATTTTTGTTTCAACAGCAACAAGAGTTGTTTCTCTATAATATAAAAGCAATAAAAGACGATTTTCATATATGGAAACTGATATCTGGGAGAATTATTTGTCTGGATCTGAAGGACACGTTTTGTAGCAGTTTACTAATATATAATTTTAGAACACTGGAAAGAAGATTTGGTAGTCGAAAATTTACGTCATTTTTGTTGGTGGCCTGGATACTCTCTGCAGTTTTTGATTTTCTACTTGTTGAAGCTGTACATTTTATATTAGGAGCAACACTTACCACTTTACCTTCAGGATTCCTAGCACCTGTG…
ENSXETG00000016464	pkdcc.1	0.16413842024697592	protein kinase domain containing, cytoplasmic homolog, gene 1 [Source:Xenbase;Acc:XB-GENE-5993401]	ATGAAGGGAGCCGTTATCCTGTGCGGAGCCGCAGTGACTGTGCTGGTTGCGCTCTATTTGCGCTTCTCCTACACGGAACCACTGGCCCATAATGGGAGGCACAAGTCCTTGCTGCGAGCCCAGCGCAACCCCGGGCTGGAGAGGGAAATCATGGAGAGACACGGAGACATGATGATCTTACTCACTTCACTACTGGCGGGTTCGGGGGAAGATGGAGCAAGGGGAGAGGATCAGCTGCTTCCCAGGGCGATGGGGCAGGGGGCTCTAGGCTGTAAGGACCTCACGTATATATCTGGGCTCCAATATGTGGGCTCCGGCTTCACTAAACTTGTCCTGAGGGGAACTCTGCTCAACGGCAAGGAAATTGCCCTCAAATCCGTGCACAATGGGGGCAACGAT…
ENSXETG00000019391	rfc4	0.2474589730026807	replication factor C subunit 4 [Source:Xenbase;Acc:XB-GENE-955724]	ATGCAGGCTTTTCTAAAAGGAGGAACATCTATCAGCACCAAGCCTGTGAAAGATAAAGCATCTGCATCTGGCACAGGGAGCACCGGGGAAAGCAAAAAACAGAAGCCTGTTCCATGGGTGGAAAAATACCGACCCAAATGTGTAGATGAGGTTGCCTTTCAAGAAGAAGTTGTTGCTGTACTAAAAAAATCACTGGAAGGTGCAGATCTCCCAAACCTATTATTTTATGGCCCACCTGGCACTGGAAAAACATCAACAATTTTGGCAGCATCCAGGGAACTCTATGGGCCTGAATTGTTTCGCCAGCGAGTTTTGGAGCTGAATGCATCTGATGAAAGGGGGATACAAGTGGTACGGGAAAAAGTTAAAAATTTTGCTCAGCTCACAGTTGGAGGGACA…
ENSXETG00000026979	sar1a	-0.08716024753396467	secretion associated, Ras related GTPase 1A [Source:Xenbase;Acc:XB-GENE-944263]	ATGTCTTTCATATTTGAGTGGATTTATAACGGCTTCAGCAGCGTGCTGCAGTTTTTAGGATTATACAAGAAGTCTGGGAAGCTAGTGTTTTTAGGCTTGGACAATGCTGGAAAAACCACACTGCTACATATGCTAAAAGATGACAGGCTCGGTCAGCATGTTCCTACACTACATCCAACATCAGAAGAGCTGACCATTGCAGGGATGACCTTTACCACTTTTGACCTCGGTGGACATGAGCAAGCTCGTCGTGTTTGGAAGAATTATCTGCCTGCAATCAATGGAATTGTCTTTCTTGTGGACTGTGTAGATCATGGGCGCCTTATGGAGTCTAAAGTTGAGCTCAATGCACTCATGACAGATGAAACAATATCTAATGTGCCAATCCTCATCCTGGGG…
ENSXETG00000039795	actn4	0.04948887406158495	provisional ortholog of PTTG1 regulator of sister chromatid separation, securin [Source:NCBI gene;Acc:100498440]	ATGGCAACTATAGTTTTTGTCGATCAAGAGAATGGTGATATTCGCAGCATGTTGCCTAAAGATCATGGAACATTCTTGAGCTCAAAACCTCAATCCAGAAAGGGTGTGGTGTCTTTCCCAGGTAAAGTATTTGGTGATTCTGAAATCGTGTCCAAGCCTTCCAGAAAAGCCCTGGGAAATGTAAATAAGCAGATCTTGCAAAACAAAGCAGTGATGGCGCAGAAAATCAACTTTAAACAGAACACTGGATCCATTGGCAAAAAGGTGACTTCTTCAAACCTGCAACCTGTGAAAGACTTGTATCCTGAAATTGAGCACTACTTTCCTTATAATCCTTTAGACTTTGAGAGTTTTGATATTCCAGAAGACCATAAACTCAGTCACTTTTGCTTAGCAGGT…
ENSXETG00000014422	pole4	-0.027354285740658263	polymerase (DNA-directed), epsilon 4, accessory subunit [Source:Xenbase;Acc:XB-GENE-5722002]	ATGGCGGCAGCGGTAGCGGAGCCGGAGTCGCTGGAGGGAAGTGGCAGCAAGGAAGAAGGGGAACCAAGCAGTCCGTCTGCACAGCCGGCTCCTCAGAAACAAGCCAGACTGCCGCTGTCCCGGATAAAAGCTTTGATGAAAGCGGATCCGGACCTTTCATTGGCTAGTCAGGAGTCAGTGTTTGTCATTAGTAAAGCGACGGAATTATTTATTGAAACCATTGCCAAGGACGCTTATCTGTATGCGCAGCAGGGAAAGAGAAAAACACTGCAAAGGAAAGACTTGGGTATGTATATTGCAGAGGACCCCTTTTCTCTATGTGAATTTTGTGGTCACAGTCTCATTGCACCCCCACCTGATGATTAA
ENSXETG00000039156	dnajc28	0.28228101597287447	solute carrier family 2 member 2 [Source:NCBI gene;Acc:496943]	ATGGGATGTGTGATCTCTGATGTTTGCACTCATTCTAAAAATTGTAACTGTTCCCTGTTAGACAATAAGATGTATTACATTAACTTGACTGGGACCCTGGTGTTTGCTGTCTTTACAGCTGTGTTGGCCTCACTACAGTTTGGATATGGTATCGGCGTCATCAATGCTCCTCAAAAGATTATTGAGAATCACTATACGCGGGTTTTACTGGAAGGCAGTGAAAATCAGACAGATACAACGCCTGTACAATCGTCTGTCAAGATGTATTGGTCCCTCTCTGTATCTGTGTTCTCCTTGGGTGGGATGGTGTCATCATTCTTCGTTGGATGGATTGCAGATAAACTCGGAAGGATTAAAGCCATGATGGTCGTAAACATTCTGGCAGTTATTGGGGCCCTT…
ENSXETG00000030958	pias3	0.11889423562594556	potassium voltage-gated channel subfamily H member 5 [Source:NCBI gene;Acc:100151738]	ATGCACAGGATGCCGGGGGGAAAACGAGGGCTGGTGGCACCGCAGAACACGTTTTTGGAGAACATTGTCAGGCGCTCAAATGAATCAAGTTTCTTGCTGGGGAATGCACAGATTGTGGACTGGCCTGTAGTTTATAGTAATGACGGTTTTTGCAAGCTTTCTGGGTATCACAGAGCCGACATCATGCAGAAGAGCAGTACTTGCAGCTTCATGTACGGAGAATTGACAGACAAGAAAACCATTGAAAAGGTCAGGCAGACATTTGAGAACTACGAGTCAAATTGTTTTGAAGTCCTTCTTTACAAGAAAAGCAGAACACCAGTTTGGTTCTATATGCAGATTGCTCCCATAAGGAATGAACATGAAAAAGTTGTTTTATTTCTGTGTACCTTTAAAGAT…
ENSXETG00000036741	NA	0.11029974435967524	NA	ATGCGTATGGCGTATATTTTTGGCAAGCCGAAAACGCTACCTGTGCCTGCACCCGAGCCCCTGAGCTCAAAGATTGGTTCTGTCTCATATGTTTCCCTAGATTCCAATCATATACAATGCCAACATTACCTCATGACCACAAGGGAGCTTCAGATGTACTGGAAGAAGGAAAAGCACAGCAGCAAACCAGATACACTTCTCTTTGAAATACAGTCTGCACGCATAGCTGAGGATTTTTTATCCAAGTTTGTGGTATATCAAATCGTCATTATCAGAACAGGCAGTTTTGATGAAAACAATGTCTTCATTGAGCGAAGATACTCTGACTTTGAGAAGCTTCACAGAACTTTATTAAAAGAGTTTAAAGAAGAAATGGAAGATGTGGTATTTCCAAAGAAA…
ENSXETG00000032224	gpr18	-0.1961687934741702	G protein-coupled receptor 18 [Source:NCBI gene;Acc:105946540]	ATGCATTTTATAAAAAAAAACAAAAAACAAACATGGCTGGAGCACAACTGGCATTATGAAGAGTATCGGGTTCCTGCACTTATTTATTACAGTGTTATGTTACCCATTGGGCTTTTAGTCAATATCACAGCTATTTGGGTATTTAGCTGTACCACAAAAAAACGCACAACAGTCACTGTGTACATGATGAATGTTGCACTGCTTGACTTAATGTTCTTAATATCTGTTCCTTTCCGCATAATATACTACGCAAAACAATACTGGCCCTTTGGAGATATATTCTGTCGGATTCTGGGTGCTCTCACTGTGTTCTATCCAAGTGTTACACTGTGGCTCCTTGCCTTTATAAGTGCTGATAGATACATGGCTATCGTGCAACCTAAGCACATCAAAGAACTG…
ENSXETG00000010147	gnrh1	-0.1167064225006435	gonadotropin releasing hormone 1 [Source:Xenbase;Acc:XB-GENE-960286]	ATGTACTCAGTTGGCCAATGTATCTACTTTAATCGCTGTATAAACACAAAGAGAATTCAATGCTACTTTATAGGATATATCAGTACTAGGGTACTTTGTTACTCAGAGGAGTACGGTGCCATCATGTGCCATAAATCTTTTGAGCAGTTACACAGACCCCTTTCTCTCTGCAGGATGAAGGCCATTTCCACCTATGCTCTTCTGCTCCTTGTCCTTCTATTTTCTGCCCACGTTGGTCATGCCCAGCATTGGTCCTATGGTCTCCGGCCAGGAGGGAAGAGGGACGCTGAAAGTCTCCAGGACATGTACCCTGAGACTCCAAATGAGGTTCCTTTGTTTCCGGAACTCGAGCGCTTGGAGTGTTCTGTCCCCCAGAGCCGACTCAACGTACTGAGAGGA…
ENSXETG00000006146	tysnd1	-0.04949194528075021	trypsin domain containing 1 [Source:Xenbase;Acc:XB-GENE-972865]	ATGCTGGAAGCTGCTGAATGGAGTGGCTGTGTTGTGACCACCGCCCAGGCATCACAAGGCAGCATACACAAGAGACATGAGAGAGGCTTCAGGAATAAGGAGCATTATATTGTTGAGAAGAGAAACCCATCTCTGTACAACAAAGCACCTCAAACAGAATGTGACGGCCAGTGGAGCTGCAGTGGGGTTATCCTAGACAGAAGCTTAGCCCTAGTACTTTGTCATGGAGCCATTTTTTTCCCATTCCTTAAAAACAACGAAAATGCATTTTCTAAAAACAACCTTCTTGCTGAGGACTTTGAGTCAGATCTTATAATACAGGTGGAATGCCCTTCCCTCCATGGAACCAGTTCTGATTCTAAAATCAAGCTGGACGCTGAGGGCCTGCAGCAGAGACCA…
ENSXETG00000024051	ocm4.3	0.4548140315069724	oncomodulin 4 gene 3 [Source:Xenbase;Acc:XB-GENE-5768036]	ATGTGGTTTCAGCCAAAAAATGTCCCTTGGTTATCAGAATTCCTGATTCCAGAATTAGCCTGCTGTATTCCTGCAAATTACTGTAACAATGACCTTAATGTTTTGCTCTTTCTCCCTAGACTGACCATGGCATTCGGTGGTATCCTGAGTGATGCTGACATCTCTGCTGCTCTGAAGAACTGCCAAGCTCCTGACTCCTTCAACTTCAAAACTTTCTTTACCCAGTCTGGCCTGAGCAGCAAGTCCGACAATGATGTGAGGAACGTCTTTGCCATCATTGACCAGGACAAGAGCGGCTTCATTGAGGAAGATGAACTGAAACTGTTCCTCCAGAACTTCAGCGCAGGTGCCAGGGCTTTAACCGATGCTGAGACCAAGGCCTTCCTGAATGCTGGTGAC…
ENSXETG00000006333	tef	0.1510490061773234	thyrotrophic embryonic factor [Source:Xenbase;Acc:XB-GENE-962732]	ATGGAGGCCTCTTCCTGCCCTTCCAGTCCGGTTACTCCATCTCCGCTTCTCGGCGGCTCCTTCCCAATTGTGCTAAGAAAGCTCTTAGAGAACCCGCCCAAGGACTTTCTGGAGACTAGAGATGAGAAAGACAAGAGCAAATTGGACAAGGATGATGATCATGATTGTAACTCTCTGGTGGCCTCTGCATCACTCATGCCCCCTATCTGGGACAAAACCATTCCATACGATGGGGAATCCTTTCACCTTGAGTATATGGATCTAGATGAGTTCTTACTGGAGAATGGAATCCCTTCCAGCCCAACACAGCTTGCTCAAGCCCTTCAGAATCCACTTGTGCCTGTCTCTGAGCTTGAAAGTGACAGTGAACCAGCTTCAACTTCAGCTGCCTCACCACTG…
ENSXETG00000035423	tyro3	0.73718757263781165	NA	ATGGGAAAGACCAAAGAGCTGTCCAAGGATGTCAGAGACAAAATTGTAGACCTGCACAAGGCTGGAATGGGCTACAAAATCATTAGCAAGAAGCTGGGAGAGAAGGTGACAACTGTTGGTGCGATTGTTCGAAAATGGAAGGAGCACAAAATGACCATCAATCGACCTCGCTCTGGGGCTCCACGCAAGATCTCACCTCGTGGGGTGTCAATGATTCTGAGAAAGGTGAAAAAGCATCCTAGAACTACACGGGAGGAGTTAGTTAATGACCTCAAATTAGCAGGGACCACAGTCACCAAGAAAACCATTGGAAACACATTACACCGCAATGGATTAAAATCCTGCAGGGCTCGCAAGGTCCCCCTGCTCAAGAAGGCACATGTGCAGGCCCATCTGAAG…
ENSXETG00000023896	chrna5	0.3078561928436202	cholinergic receptor nicotinic alpha 5 subunit [Source:Xenbase;Acc:XB-GENE-5755296]	ATGCTGCTTCCCGGGACTGAACAAAAGGACTGTGTGATACAAAGGATGCCTTGGTGTGCAGAGTATTTGCTTTGGCTGTTTCTATGCCTGGATATCCTGCATGGAGCTTGCGGAATATCAGAACCATCGTATATTGCCAAAAGTGAAGACCGATTATTCAAATATTTGTTTCAGCAGCAAGACTACCAAAGATGGGTTCGCCCAGTTGAACACTTGAATGATACAGTGAAAGTGAAGTTTGGCCTTGCCATTACACAGCTTGTGGATGTAGATGAAAAAAATCAACTAATGACTACAAATGTATGGTTAAAGCAGGAATGGGTTGATGTTAAGTTGAGATGGGACCCAAATGAGTTTGCTGGAATAACATCAATTCGTGTCCCCTCCGATTCTATTTGG…
ENSXETG00000006147	spock2	0.16949998825996163	SPARC (osteonectin), cwcv and kazal like domains proteoglycan 2 [Source:Xenbase;Acc:XB-GENE-1003767]	ATGTGGAACCCGGGGGGCTCCTGTCTCATTCTCCTGCCCCTATTGCTTCCTATCGCCTGGGCACAGGGAGATGGCAAGGAGGTGGAAAATACCGGCAATTTTATGGAGGATGAGCAATGGCTGTCCTCTATTAACCAGTACAGCGGCAAGATCAAGCACTGGAACCGCTTCAGAGATGACGACTATATCAAAAGTTGGGAGGATAACCAGCCTGGAGATGAAGCTCTGGACACTACAAAGGACCCTTGCCAGAAAGTGAAATGCAGCCGACACAAAGTTTGCATCGCACATGGTTACCAAAAAGCAATGTGCATAAGCCGTAAGAAGTTGGAGCACAGAATCAAACAACCTAGCATGAAGATTCATGGAAACAGAGACAGTCTTTGCAAGCCCTGCCAT…
ENSXETG00000006078	ccdc85a	-0.7361145053038101	coiled-coil domain containing 85A [Source:Xenbase;Acc:XB-GENE-954470]	ATGTCGAAGGTTGTTGGAGAAAGTTGTGCCGAAGACCTGGCGAAGGTTTCTGACGAGGAGCTGATGAAGTGGAGTAAAGAGGAGCTGATTGTCCGGCTCCGCAGGGCAGAGGCGGATAAGATGAGTGCCATGCTGGATCACAGTAACCTGATCCGGGAGGTGAACAGGAGACTGCAGCTGCATCTGGGGGAGATCAGAGGGCTCAAGGATGTAAATCAGAAGCTGCAAGAAGATAATCAAGAACTCCGAGACCTATGTTGTTTCTTGGATGATGACAGGCAGAAAGGGAAAAAAATTTCCAGAGAATGGCAAAGGCTGGGAAGATATACATCAGGAATCATGCAAAAAGAGGTTACTTTATACCTACAGAAACTGAAGGACCTTGAAGTAAGACAAGAA…
ENSXETG00000034720	NA	0.0789001737188467	galanin receptor 3 [Source:NCBI gene;Acc:100488248]	ATGTCTCAGGCGTGGAATAGCTCAGTGTCATCAGAGCTCCCTCCAGGCGGGATCATTGTGCCTGTGGTATTTTCCCTGATATTTGCCCTGGGGACGGTGGGCAATGGGCTTGTCCTGGCAGTGTTACTGAGGAATGGGCAGACCAAGTACAACACAACTAACCTCTTCATCCTGAACTTGGGCGTAGCAGACCTGTGCTTTATACTACTGTGCGTCCCTTTCCAGGCCACCATATACACCCTGGATGGATGGCTATTCGGGGCTTTCCTCTGCAAAGCTGTGCACTTCTCTATCTACCTATCAATGTATGCCAGCAGCTTCACCTTGGCTGCCGTCTCAGTGGACAGGTACCTTGCCATCCGCTACCCACTAAAGTCTAGAGACCTTCGCACCTCTCGA…
ENSXETG00000019217	pdlim5	0.21625445125726048	PDZ and LIM domain 5 [Source:Xenbase;Acc:XB-GENE-854114]	ATGAGTAACTACAGTGTGTCTCTGGTTGGCCCAGCTCCCTGGGGTTTCAGGCTGCAAGGAGGCAAAGACTTCAACATGCCTCTAACGATCTCCCGGCTAAGTGATGGAGGGAAAGCTTCTCAGGCACACATTGGCATTGGTGATGTGGTTCTTACAATAGACGGTATAAGCACAGATGGGATGACTCACTTAGAGGCACAAAACAAGATTAAGGCATGCACTGGTTCACTAAATTTGACCCTACAAAGAGCTTCAGCTGCGCCAAAAGCCAATCCAAATCCTCCACAAACTGAAACACCTAAGGAAATTATTAAGCCTGTGCCAATAGCATCTCCCACACCTGTTGCACCCAAAGTCTCCAATGTGGCATACAATAAAGCACCTAAGCCATTTGGATCT…
ENSXETG00000040745	lrrc57	0.7632370267682917	NA	ATGGGAAAGACCAAAGAGCTGTCCAAGGATGTCAGAGACAAAATTGTAGACCTGCACAAGGCTGGAATGGGCTACAAAACCATTAGCAAGAAGCTGGGAGAGAAGGTGACAACTGTTGGTGCGATTGTTCGAAAATGGAAGGAGCACAAAATGACCATCAATCGACCTCGCTCTGGGGCTCCACGCAAGATCTCACCTCGTGGGGTGTCAATGATTCTGAGAAAGGTGAAAAAGCATCCTAGAACTACACGGGAGGAGTTAGTTAATGACCTCAAATTAGCAGGGACCACAGTCACCAAGAAAACCATTGGAAACACATTACACCGCAATGGATTAAAATCCTGCAGGGCTCGCAAGGTCCCCCTGCTCAAGAAGGCACATGTGCAGGCCCGTCTGAAG…
ENSXETG00000012208	mgc89226	0.12103695406064538	mgc89226 protein [Source:Xenbase;Acc:XB-GENE-5804925]	ATGCACCATATGGACAAGCTCCAGGAGGAATATACCCAGGTTTCCCTACAGGGCCCCAGCCTGCCACACCAAATGCCCCATCAGGCCCTACTGCACCCTATCCAGGGGCTCCTGCTGGAAATTACCCAGGAGCACCAAATGCCCCATCTGGTCCCACTGGGCCTTTTCCAGGAGCACCTGCTGGGCATTATCCCACAGCGCCAAATGCCTCAATTGGACCAGCTGCTCCCTATCCAGGAGCACCCGCGGGTCAGTACCCAGCAGCACCGAATGCCCCATCTGGACCTGCAGGACCTTACCCAGGAGCTCCAGGAGGTCAGCACCCTTCAGCACCTAATGCTCCTTGTGGGCCTTATCCAGGAGCTCCTCCTGGACAGCACCCAGGAGCACCTACAGGAC…
ENSXETG00000005759	znf462	0.12328139472539709	zinc finger protein 462 [Source:Xenbase;Acc:XB-GENE-976911]	ATGGAGGTTCTTCAGTGTGATGGCTGTGACTTCAAAGCTCAGACCTATGAAGACCTAAAATCTCATATTCAGGATGTCCATACAGCATTTTTGCAACCCACAGATGTAACTGAGGAAGGTGCTACCCAGGCAAAAACTGTGGATACGCATTCCAGCAACCAGTCAGAAGGAGTGTTTACTTCTGTTAAGGATGAATATGCATCAGCTGAAGAAAATCATGCGCCAAGTACTCCTCAGGCTGCAAGTGGATCATACTATGGCCATAGCCCAAGTTATTTTAGTCAGTCTAATCATGCAGGAAATTCGAAGCCAACCAGCAAGTTTTTTCAGTGCAAATTCTGCATTCGATATTTTAGATCAAAAAACCTTCTTGTGGAACATACTAGAAAGGTTCATGGG…
ENSXETG00000017289	clcn2	0.2909659945147073	chloride voltage-gated channel 2 [Source:Xenbase;Acc:XB-GENE-494657]	ATGTCCGGGAACGGGATGCAGCATCGAGCTCTGAAATATGAGCAAACGCTGATGTATGGCAGGTATACACAGGACCTTGGAGTTTTTGCCAAAGAGGAGGCAGCACGTATTCGACAAGAGAGAGAAGTCCACAGACCTGCCACAAAACCGCAAACTGTAGAACTGCGAGAGTATGATGAGAGTCGCTGTGCCAAGTGCAAAATCTGCTGTGTGCACTCCCAAAGACTTGTGCTCTCCCGAGTTGGGGAGGATTGGATTTTCCTAATTCTCCTGGGTTTGCTGATGGCTCTGGTGAGCTGGGCCATGGATTTCACAATTGCCATATGCCTACAAGCTCACAAGTGGATGTATGGTGGCTTGGACAATAATGTTTTTCTGCAGTATCTAGCATGGGTCACA…
ENSXETG00000023808	arhgef11	0.06328630217375139	Rho guanine nucleotide exchange factor 11 [Source:Xenbase;Acc:XB-GENE-992398]	ATGAGAAGGCGAGGGCAGATAAATGCGGAAATTCAGCCCATACTCACGAATATATTGATTGACACCAGTGATGTGACTTCCAGGTTGAGTAGCCTGTCATCGGCTAGTGACGGAGCGGCTGAACGAAGGTCTCCTGGGCACCAGCGTCAGCCTTGTGAGAGTAACGAGTCTACAGGCTTGGTCCAGCGCTGTGTCATTGTACAAAGGGACCAGAATGGATTTGGTTTCACGGTCAGCGGGGATCGAATTGTTCTGGTTCAGTCCGTACGTCCAGGTGGGGCAGCAATGCGAGCTGGGGTGCAGGAGGGAGACCGTATTGTGAAGGTCAACGGCACGCTGGTGGCGAACAGCTCACACATCGAAGTTGTCAAGCTGATCAAATCCGGCGCTTATGTTGCT…
ENSXETG00000033676	c1orf159	-0.4569534674689465	phospholipase A2 inhibitor subunit gamma B [Source:NCBI gene;Acc:100494201]	ATGAGAAGAACCCTGATATTCACTTTCCTCCTGACTCTCCCAACTTGCTGCTACTCTCTGTCCTGTGTGCACTGCAAAGTAGAAGGGGAGAACTTCTGTCAGGGGCCAGAAAGGAAATGTCCCACGTGGGGAGATTTTGTGTGCGCCTCCACTAGCACAATCACCATAATGGGTACTGTCTTGTTTGGGGGGGTCAACACTGTATATCCATTATACACTTTTGCAGTTTTATACGCTATTATCTTGCTCCTCATCTATATGTGGGGTCTTTGTCATCCCTGCACCAGCCAATCATCCTTCTTTACTGTACCAGGACCAATCAGCATGCCTGATACAAAGTCAATGTACAGTATGTGCCCTATTACAGAGTTGTGTTGTGCTTTATCCACAGAGGGAGTA…
ENSXETG00000004914	slc49a3	0.020930739501988066	solute carrier family 49 member 3 [Source:Xenbase;Acc:XB-GENE-5740366]	ATGGCTGAGGATGTGAGCAGCGGGGAACAGACAGAGGACCAAGCTGGGCAGCCGCTTCTTAATGGGGAGATAATAGCCTCGAACGGGGATAAGTGCCAATTTCGGACCTACAAGCGAAGATGGTTTGTTCTGGGCGTAATATGCCTGCTGAGCTGTACCAATGCCATGCTGTGGATCAGTTTTGCCCCAGTGGCTGATGTGACGGCAAGTTTCTTCAAGTGTAGCCTTGACGTTGTCAACTATCTGTCTCTTGTGTACCTCATTATTGCAATTCCAGTGGGATTTGGAGCATCGTGGCTGATAGATACTCTTGGACTAAAATATGCTGTAATCTTTAGCTCTTGGCTTAACATGATTGGAAGCATCATACGTTGTGGTGCTATTGTACCTTACCTCAAT…
ENSXETG00000031941	NA	0.023062227127251894	SERTA domain-containing protein 2 [Source:NCBI gene;Acc:100496857]	ATGCTTGGTAGAGGACTTAAACGCAAGCTGAATGATTGTGAGGAGACCATGAACGACTTTTCTAGTGCCTGTGACTTTAACAGAAATATGCCATACAGTCATCAGAGGCAGCTGGTGCTGAATATGTGCCTCAACAAATTACAGAGAAATGATTCCATAGAAAACCCTGTGAATTTCTTGATGGAAGTCACTGATGACGACATGTCATCTGCTATATCATCTATTCTAAAGGATCTGGACTTTGTGGAAGACATTAGCCCATCTCAGACACCGGCCTCTTTTGGCGACAAACAGGACATAAAAGGAGGGGAATGTGTTTTTGGTTCCTTTGAAATCACAAGTTCTATAAGTTATTTGAAAGATTTATCTGTAGATGACATTTTTGAAGATATTGATACA…
ENSXETG00000035717	rad54l2	0.4524085348426057	NA	ATGCAACTGAGCCAATCAGCAGACAGAGTAGATTCTATAAAAGGAGAACAGAAAAGCGCGGCTGGTATATTTCTATTTTCTGAAAAGAACGATAGAAGATTTGCAATGGCTGAAGCAGCTGAGACGGCGCCTGCTCCTCCCCCGGCTGAACCCGCAGCCAAGAAGAAGAAACAGAGCAAGAAAGCAGCGGGGGCCACTAAATCCAAGAAGCCATCTGGGCCCAGTGTGTCCGAACTGATAGTCAAAGCCGTATCCGCTTCCAAGGAGCGCAGCGGGGTGTCCCTGGCAGCTCTGAAGAAGGCTCTGGCTGCAGGAGGTTACGATGTGGAGAAGAATAACAGCCGCCTCAAGCTGGCTCTCAAGGGCTTGGTCAGTAAGGAGACCCTTGTCCAAGTGAAA…
ENSXETG00000009511	wdr61	0.20421973707032545	WD repeat domain 61 [Source:Xenbase;Acc:XB-GENE-5751496]	ATGAGTACACAGTACAGCATTCTTTTCAAGCAGGAACATGCCCATGAAGATGCAATATGGTCAGTAGGATGGGGGAAAAACTCAAATGATGGGTCAGAGCTGGTGATCAGTGGTTCCCTGGATGATTTGGTCAAGGTGTGGAAATGGTCTGATGAACGGTTGGAGCTACAGTCTACACTGGAAGGCCATCAGCTAGGTGTGGTGTCAGTGGATGTCAGCCCTAGTGGGAACATAATGGCTTCCAGTTCCTTAGATGCTCACATTCGCCTGTGGGATCTTGAGAGTGGGAAGCAGATCCGCGCCATTGATGCAGGACCAGTGGATGCTTGGTCTGTAGCTTTTTCTCCTGACTCCCAACACCTTGCAACTGGAAGCCATGTGGGAAAAGTAAACATCTTT…
ENSXETG00000003340	f2rl2	-0.07039771541432013	coagulation factor II (thrombin) receptor-like 2 [Source:Xenbase;Acc:XB-GENE-6458172]	ATGAGTCCCTTCCTTGTCCTATTCCTTTTGTGTGGGGTTGCTCTGGGGCTCAAAGATGAGGATACGCTGGAGAAAAATGAATCTGCTGTCCCCAAGACATTTCGGGGAAAGAAAGAAGGTGGGGAATATGAAGAGCTTTCCCATAGCATTCTGCATGGCCTGCCAGACACCACGACCAATAATAATCCTTTTCTAAGAATCTCCAGCAATAATGCCTTTAAAGTCGCCAGCGAACACACCATCACTAAAGTCAGCAATTCAACCTTGGTGTACCTAAGTGGCAAAGTAAGCAGGGAACTGATACCGGGCATCTATATCATTGTTGTGCTCATTGGTGTGCCAGCCAATGCCTTGGTACTATGGATGCTGTTCCATCAGGTGACATCTGTGTGCACCACT…
ENSXETG00000034506	manf	-0.0983242696121499	phospholipase A2 inhibitor and Ly6/PLAUR domain-containing protein [Source:NCBI gene;Acc:100494026]	ATGGGTGGGATGGAGGTCTCTAAACTGTTTATTAGACAATGTGAATCGAAGGAGAAGTGCGACAAAGCCGGGACTATGAGCATCCCCAATGGCAAAGTCAAAATGAGCAACGTGTGTTGTAAGTCCGACAACTGTAATCCAGGAATTCCCAAATTGCCTCTAGAGAAAACCTTGAAGAATGGCATCATGTGTGAAGGCTGCATTGATACAAATAAGAAGTCTTGTCAGTCGGGTCAACCCCTGGAATGTGTTGGAGATGAGACGAGGTGCATTACATACGTTACCTCCATGTCAGGTCTCATATCCACGTCGATGGCGGCACGTGGCTGTGCAACAAAAGATTTCTGTGAGATTGGGGAACAGGAGATGGGAAACGATTTGGTGAAAGTGGAGGTGGAC…
ENSXETG00000035542	dock3	-0.0321436151260647	NA	ATGGTTGAACGTGATGAACATACTCTCTTCCGGGAGTATCTGAAGATTCAAACAGTGCAGCCAGATCCTGATTACGGTAACAATGGAGCAATGAATTTCCTGACTCGGGTGGCAGAGGACATTGGGCTGGAAAGCAAGAAAATAGAGGTACTGGGACGTGTTATACTCGTACTAACCTGGCGAGGAACAGAACCCCAACTCAGATCAGTAATCCTCAACTCTCACATGGATGTGGTTCCAGTATTTGAGGAATCCTGGATGTACCCGCCATTTTCTGCCCATAAAGATAAAGCCGGTAACATCTATGGGAGAGGGGCACAGGACATGAAGTGCGTTTCGATTCAGTACCTGGAAGCTGTGCGCCGGCTAAAATCTATGGGACGATGCTTCCCACGCACC…
ENSXETG00000021518	kcnn2	-0.5309755692139807	potassium channel, calcium activated intermediate/small conductance subfamily N alpha, member 2 [Source:Xenbase;Acc:XB-GENE-6077411]	ATGCCATTTGTTTTGGTTCGCCCGACCAATCGGACGCGCTGCCTGGATTCTACGGGTGCCGAAATGGCCCCTTCCTCTCGAGTTGAGGGCTTCGCCATCCCTAGCAGCGCGCATTGCGCTGGGCTCAGTGCCTGGCAAGACTCCTGCAGCTTTAACAGCTCTGACATGGACACATCGCTGCAGTTCCAGCGCGGCTTCTCCCCAGAGCAGCAGCACAGTCTCCCCCGGCCGCAGCACCTGCACTGCCAGAGCCCGGACGAGCAGCTCCTGTACCAGGCGGACGGTCCTTGTGTGCAGTGCAACAGCTGCTCCTTCCAAGGGGACAATCTCCCTCTTCTTCGCACCTCTTCGCCCATTATCGGAGCTTTCCGCACCGGCTCCTCTCCTCTCTCGTCCGGC…
ENSXETG00000005312	kcnh6	0.23579076782049255	potassium channel, voltage gated eag related subfamily H, member 6 [Source:Xenbase;Acc:XB-GENE-990943]	ATGCCAGTAAGAAGGGGGCACGTAGCCCCTCAGAACACTTATCTGGACACCATCATACGGAAGTTTGAAGGGCAAAGTCGCAAGTTTCTGATTGCCAATGCCCAAATGGACAACTGTGCCATTATTTACTGCAATGATGGTTTTTGTGACATGTTTGGGTACTCAAGGGTGGAAGTCATGCAGAGACCCTGCACGTGTGACTTTTTGACTGGCCCAGAGACAACAAGCAACAGCATTACCCAACTCACTGAGGCTCTGCTGGGGTCAGAGGAACGCAAGCTGGAGATCCTCTACTACAGAAAGGAAGGTTCATGTCTACGATGTTTGGTGGATGTAGTTCCAGTGAAGAACGAAGAGGGAGATGTCATCATGTTTATCCTAAACTTCGAGGACCTGGCG…
ENSXETG00000041179	NA	0.4384637059431231	NA	ATGCCCGAACCCGCCAAATCCGCCCCAGCGCCAAAGAAAGGCTCTAAGAAAGCGGTGAGTAAAACGCAGAAGAAAGATGGGAAGAAGCGCAGGAAGAGCAGGAAGGAGAGTTACGCCATCTACGTGTACAAAGTGCTGAAGCAGGTGCACCCTGATACCGGCATCTCTTCCAAGGCCATGAGCATCATGAACTCCTTTGTTAACGATGTGTTCGAGCGCATCGCAGGGGAAGCCTCCCGCCTGGCTCATTACAACAAGCGCTCCACCATCACCTCCCGGGAGATCCAGACCGCGGTCCGCCTGCTGCTGCCTGGGGAGCTGGCCAAGCACGCTGTGTCCGAGGGGACAAAGGCTGTGACTAAATACACCAGCGCCAAGCACGCTGTGTCCGAGGGGACA…
ENSXETG00000002935	mogat1	0.10655526908974008	monoacylglycerol O-acyltransferase 1 [Source:Xenbase;Acc:XB-GENE-1004226]	ATGGGAATGAAGCTTGAATTTGCTCCTATCAATATTCCCCTGGCCCGGAGGTTGCAGACAACTGCTGTGTTCCAGTGGGTATTTTCCTTTCTGTTACTAGCACAGTGCTGTATAGGGATATTCCTCTCTCTGGTGCTGGCAAGATTATGGCTCATTTTAGCACTATATGTTCTCTGGCTGTACCTCGACTGGGAGACCCCCCAGGCTGGAGGCCGAAGGTGGGAATGGGTACGGAACTGGACTGTATGGAAGTATTTTAAAGATTATTTTCCTATCCGGCTTGTGAAAACATGTGATTTAGATCCACAGCACAACTATATAATGGGGTTCCACCCACATGGAGTGCTTGTCGCTGGGGCCTTTGGTAACTTCTGTACTAACTACACTGGCTTTAAGGAA…
ENSXETG00000024582	ggact	0.04753647701500027	gamma-glutamylamine cyclotransferase [Source:Xenbase;Acc:XB-GENE-961428]	ATGGAAAAAATGACAAATATATTTGTGTATGGAACACTGAAGAGGGGACAGCCAAATCACACAGTAATGACATGCTATAAACATGGAAAAGCTGTTTTTAAAGGAATGGGTAAAACAGTAGAAAAATACCCACTGGTGATAGCGGAGGAAGCCAACATCCCATTCTTACTAAACATTCCAGGAACAGGGAGACGTATTATAGGAGAGATATACTCCGTTGATGACTCTATGCTACAATTCCTGGATGATTTTGAAGGCTGCCCAAACTGGTACCAACGTACTTCTCAGGGCATCGAAATATTAGAGTGGGACGGTACAGAGGATTCACCAGAGGAGAGACCAGCTGTTAAAAGTATCATTACCTGCTTTCTCTATAGCACAACCTGCTACCAGCCCCAT…
ENSXETG00000031680	cacna2d2	-0.20994462002266218	provisional ortholog of phospholipase A2 inhibitor and LY6/PLAUR domain containing [Source:NCBI gene;Acc:100145442]	ATGGGGGCCATTCTACTGTTCAGCTGTCTCCTCTCTTCCATCATAGCCAGAGGTTCCTCCCTGCAGTGCGTAGAATGTATGAATCAAGAAGGTGAGACCTGTACCGGGGCCTTGGTGACGTGTCCAAGTGGGGACTATGTCTGCTCCTCAACCTACACCCTGACCATGATGCAGGGGGCAGGTACCAGCAAGCAGTTTGTCAGACAGTGCGAAAGTCGAACGAGTTGTGGGAAAGCCGGAAGCATCACCATGCCCGGGGGCAGGATTAAAAGCAACTCCGCATGTTGTTCCACCGATGGCTGCGATCCCGGAACCATTTCATTTCCACCCGATAAAACTGGAAAGAACGGGCAAGTTTGTGAAAGCTGCTTAGCTATTGGCTCCGAGACCTGCAGCTCG…
ENSXETG00000006623	lrrc15	0.03703945299848574	leucine rich repeat containing 15 [Source:Xenbase;Acc:XB-GENE-990725]	ATGAAGTGGAATTCATTCAGCATTCAAATTTTCTCTTTATTTGCAATAACTTTGGTTTATGGGCAGTGTCCGAGTGACTGCATATGCCCTAGGCCTGGCCAGGTGGATTGTTCTGGACCAGAAGTCTTAGTGATTCCAGATAACATTCCTCAGAACATCAGAACACTGCAGATAGTCAACACTGAGGTTACAGAGCTACCAAATGGCATTCTTCAGAATATGACTGCCTTACTGATTTTAAGGATTGAAAAAAATGAACTGTCTACCGTGGGATCCACAGCATTTCACAACCTAATATCTCTCCGATATCTCAGTCTGGCAAACAATAAACTGCAAGAACTTCATGGCAATTTGTTTAAAGACTTGGCAAAACTGGAGACCCTTATTTTGTCCAACAAT…
ENSXETG00000003446	GP5	0.033510465725424016	glycoprotein V platelet [Source:HGNC Symbol;Acc:HGNC:4443]	ATGGTGACTTTCATATACCTGCTGATTGCTACCCACCTTCTGTTTGTGGGTGCCACTTGTCCTACTCTGTGTAACTGTGATTTGAAAGATGCAATTATTTGCAGAGGAACATCTATTAAAGACATTGGCTCATTACTTCTTCCATCTAACTTTACATACATTCATATAATGGAAACCCTTGCAACAGAGATAACAGATAAAAGCTTTGGTAACATGCCGGTCACGTTACGTCTTCGCTTGGAGGCCAATCACTTGACTTCCATAACCAGAAATGCATTTAAAAGTTTTCCTCATTTAAAAAGCCTGAAACTTACAGACAACAAGTTAAAGACCTTGCCCGCTGGTATGTTTGATTCATTAATTAGCCTGGAGCAGTTGTTTCTTGATAAGAATTGTTTG…
ENSXETG00000006803	cdca4	0.19198029616309106	cell division cycle associated 4 [Source:Xenbase;Acc:XB-GENE-992111]	ATGCCTTCTCAAGAGGTTACAATGTTTACTAGAGGAATTAAGAGAAAAAGTTGTGACCCCGAGGAAGATAATGATGGCCCTCTAGCTGAGGTGAAAACCGTTCCTTCATACACTCTTGAACGACAGTCATTACTAGATATGTCTCTGGTTAAGCTTCAGCTATGTCACATGCTTGTTGAACCCAACCTTTGTCGCTCTGTACTTATTGCTAATACAGTACGGCAGATTCAAGAAGAGATGACTCAAGATGGTAGCTGGCACATTTTTGATCAAAGAAGAACTGATCAGTTTCCATTAGATCGTCTGGTTTCCACAGACATCCTTTGTCGTTCAACCAAAGAACAGGATGAAGGGAGAATGAATGATGAATATATTGCTTACAGTGAAGAACTGGAAGTG…
ENSXETG00000012560	c2cd3	0.22990410381086654	C2 calcium-dependent domain containing 3 [Source:Xenbase;Acc:XB-GENE-5904944]	ATGAAGAGTCGGAAAGTGAAGAGTGTCCGGCCGGGGAGAGGGCGCAGAAAAGGGCTCACAGATGTTACTCCATCCACCAGTCTCCCTCCGCTTGTAGAAGGCCAGGTCCGCAGTTTCTTGCAGGTGACAGTTAGTAAAATCCTTTGGACCGTCCCCAAGCCTCCACCCTCGGTATTGGTGAGACTGCGCTGGTGGGGAGAGACAGCCAATGGCACTGTTTTTCGACCTCGCGACTCTTCACAGACTGAGCAAAAAGGAGCAAAGACAACAACCCGCTATGCTGTTCGATGCGGCCCAAAGCAGTTCACCTCCTACCTGACAGACATGGGCATGCTTGTGTTTGAAGTCATGACAAAGCTGGATCACTTTCCCATTGGCCGTGCCCAGATCAGCGGCATC…
ENSXETG00000010932	skiv2l	0.40870014914821473	Ski2 like RNA helicase [Source:Xenbase;Acc:XB-GENE-486233]	ATGAATACTTTAGACCTGTCGAATAGAGATCCACTTGATCTACCACTTTCAGTGCTAGAACTGGGTATTGCTGGCAGATTGGAACTTATAACAGATCATGCCAAATGCGATGGACATTCCACTCCTTTATCTACGATCCCCAATGGGCTACCACCTTATGATGTTGATTTGTCCTATGAAGTTATCCATAAGTATCTTGCTGATCCTGAATGGCTTTCTATCCATCACTTTGACAGGTGCCAGAGGTCCTGGCCTCGAGTGAAGAACCTGGACTCCCTTTATCACATGGAGGTCACAGCTCCACACAATGAACTCAGTGTGGAACGAAATGCAGCTACGGGGGAGTTACATGGAATAAATGAGACCTCTGTGGATCACTGCAGTCTTTCAGCTCAGAAC…
ENSXETG00000017697	birc6	0.3916349866374307	baculoviral IAP repeat containing 6 [Source:Xenbase;Acc:XB-GENE-1001894]	ATGGCGGCGGGGGCCTCGGAGTGGCTGCTCCTAAGAGACGGCTGTTTTCGCTGCGACGAGCAGGGTGTGAGCAGCTTGTCCTACCACCCGTCTCTTAATGCGATCCTGGCTGTCACTAACCGGGGCAGCATTAAAGTGATCGACGGCACGTCAGGGGCCATTCTGCAGTCGTCAGCTGCACACGTGAAACCTGGTGGTCGAGTGAGATGTCAGTATTTCCCAACAGTGGATAAAGTTATTTTTGTAGATGATTATGCAGTGGGCTGTAGAAAAGATCTAAATGGAATTTTATTGCTAGAGACAGCACTTCAAACCCCAGTTTCCAAACCAGATGATGTGATCCAGCTTGAGTTGCCTGTTACGGAGGCACAACAGCTGTTGTCTGCTTGCCTGAAGAAG…
ENSXETG00000033354	gpr132	-0.2960046922878618	G protein-coupled receptor 132 [Source:NCBI gene;Acc:100145370]	ATGGGCACCAGTGCTACACACCAGACATGGATTTTGAACCAAACAGGAAATACAAGTACTTGCAACCCAGAATACAACAAGAGTGTGCACTTTGTGACGGCAATGTACAGTGTTGTTTTGGTTATTGGATTCCCAGCAAACATGTTAACTTTGTGGTTAACAATACTGCAGATACGTAGAAAAAACGTACTGGCTGTCTATCTGTTCAGCCTATCTTTAAGTGAATTGATGTACTTGGGGACGCTACCTCTCTGGATCCTTTACGTGAAGAATGACCATAAATGGCAATGGGGTGCTCTGGCTTGCAAGATCACTGGGTACATCTTTTTCAACAACATATACATTAGCATACTCCTGTTGTGCTGCATTTCTCTAGACCGATTTGTGGCAGTTCAGTAC…
ENSXETG00000001617	lpin2	0.15696237834688107	lipin 2 [Source:Xenbase;Acc:XB-GENE-1032006]	ATGTTCACATTGGACAATCAGGAGTCACATGCAGAGGATATAGTCGATGAATACACGCAAGAAGGGACCTCTTATAGCCTGCTGTCCCAAACAATGAACTATGTCGGGCAACTAGCTGGGCATGTCCTGGTTACAGTGAGGGAATTGTACAAAGGCATCAACCAGGCTACCCTGTCCGGCTGCATTGACGTTATAGTGGTTCGTCAGCGGGATGGCACCTACCTGTGCTCTCCATTTCATGTGCGATTCGGGAAGCTCGGAGTTCTACGTTCAAAGGAGAAAGTGATTGATATTGAAATCAATGGAACCCAAGTAGATTTGCATATGAAACTCGGTGACAATGGAGAAGCCTTCTTTGTGCAGGAAACAGAAGAAGAAAGTGAACAAGTCCCAGCATAT…
ENSXETG00000040201	syt3	0.082238758153197	NA	ATGTCAGGAAGAGGCAAACAAGGCGGGAAGACCCGGGCAAAGGCCAAGACTCGCTCATCTCGGGCTGGGCTGCAGTTCCCAGTCGGCCGTGTTCACCGGCTGCTGAGGAAAGGCAATTATGCTGAGCGGGTGGGAGCCGGAGCTCCAGTCTATCTTGCCGCAGTGCTGGAGTATCTGACCGCTGAGATCCTGGAGTTGGCCGGGAACGCTGCCCGGGATAACAAGAAGACCCGTATCATCCCCAGGCACCTGCAGCTCGCTGTGCGCAACGATGAGGAGCTGAACAAACTGCTCGGAGGGGTGACTATCGCTCAGGGCGGTGTCCTGCCCAACATCCAGTCCGTGCTGCTCCCTAAGAAAACCGAGAGCACCAAAGCGGCCAAGAGCAACGGCTCTTCA…
ENSXETG00000005751	rad23b	0.2065279941534682	RAD23 homolog B, nucleotide excision repair protein [Source:Xenbase;Acc:XB-GENE-984319]	ATGCAGATCACTCTGAAGACCCTTCAGCAGCAAACATTTAAGATAGACATCGACGGAGAGGAGACGGTCAAAGCACTGAAAGAAAAGATTGAACTAGAAAAAGGGAAGGATGCATTTCCTGTTGCTGGTCAAAAGTTAATTTATGCAGGTAAAATTCTAAATGATGACACGGCCCTTAAAGAATATAAAATTGATGAGAAGAACTTTGTGGTGGTTATGGTGACAAAACCAAAAGGTGCAGCATGTTCTTCAACTCCTACTCCTGCAGCATCCCAGCCAGCCAGTGCTGCAGCTCCAGCTCCGGCCTCACCCCCTCTAACATATACACCAATTGCCCGACAAAACGCCCCTATACCCTTGCCTGTACCTTTCTCCATACCCGCTGTTCCTGCTCCTGCT…
ENSXETG00000006631	ncald	-0.3093791289998202	neurocalcin delta [Source:Xenbase;Acc:XB-GENE-948387]	ATGGGGAAGCAGAACAGCAAGTTGCGCCCTGAAGTCATGCAGGACTTACTAGAAAGCACAGACTTTACCGAGCACGAGATCCAGGAGTGGTACAAGGGTTTCTTGAGAGACTGTCCAAGCGGGCACCTAACCATGGAGGAGTTTAAGAAAATATATGGGAATTTTTTTCCATACGGGGACGCTTCTAAGTTTGCAGAACATGTATTCCGCACATTTGATGCGAACGGCGACGGGACAATTGATTTTAGAGAATTTATTATTGCTCTGAGCGTGACTTCAAGGGGGAAACTGGAGCAGAAGTTGAAGTGGGCATTTAGTATGTATGACTTGGATGGAAATGGGTACATCAGCAAAGCAGAAATGCTGGAAATCGTACAGGCAATCTATAAAATGGTTTCT…
ENSXETG00000032120	NA	0.21524775885398303	aminoacylase-1 [Source:NCBI gene;Acc:101735201]	ATGTATTCAGCTAGTCAAACTGAAGATCCAGCCACAAGTCTCTTCCGGGAGTATCTGAAGATTCAAACAGTGCAGCCAGATCCTGATTACGATGGAGCAATGAATTTCCTGACTCGGGTGGCAGAGGACATTGGGCTGGAAAGCAAGAAAATAGAGTTGTCCTCAGGACGTGTTATACTCGTACTAACCTGGCGAGGAACAGAACCCCAATTCAGATCAGTAATCCTCAACTCTCACATGGATGTGGTTCCAGTATTTGAGGAATCCTGGATGTACCCGCCATTTTCTGCCCATAAAGATAAAGCCGGTAACATCTATGGGAGAGGGGCACAGGACATGAAGTGCGTTTCGATTCAGTACCTGGAAGCTGTGCGCCGGCTAAAATCTATGGGACGATGC…
ENSXETG00000032892	awat1	-0.01406558001597516	acyl-CoA wax alcohol acyltransferase 1 [Source:NCBI gene;Acc:100127622]	ATGCAGGTGCTCGCTGTACTGAAGTGGATTCTGACATTCCTATTTCTTGGCCCAATTTGCGTTCTTATAATCATTTGGATTTCCTGCAGCCCATTATGGCCTTTACTCGCATTGTACATGGTATGGCTAGTATCTGATCGGAAAACACCAGAGAGAGGTGGAAGAAAATCTGTGTGGATGAGCAAATGGACCATATGGAAACATTTTAGAGACTATTTTCCTGTAAGGCTTCACAAAACAGCAGAACTGGATCCACAGCAAAATTACATCTTAGGGTACCACCCTCATGGAATTATGAGCATTGGTGCCTTCTGTAATTTTGGCACAGACAGTACAGAATTTTCTCAATTGTTTCCTGGACTGAAAACATATCTTACCACTCTAGCTGGGAATTTTAAG…
ENSXETG00000036552	hist1h4c	0.3934714672102	histone H4 [Source:NCBI gene;Acc:100495739]	ATGTCTGGCAGAGGCAAGGGCGGTAAGGGCCTGGGGAAAGGAGGCGCCAAGCGCCACAGGAAGGTGCTGCGGGATAACATCCAGGGGATCACCAAGCCCGCCATCCGCCGCCTGGCACGCAGAGGGGGAGTCAAGCGCATCTCCGGCCTCATTTATGAGGAGACTCGGGGGGTGCTGAAAGTTTTCCTGGAGAACGTTATCCGGGACGCTGTCACCTACACCGAGCACGCCAAGAGGAAGACTGTTACCGCTATGGATGTGGTGTATGCTCTCAAGCGCCAGGGCCGCACTCTCTACGGATTCGGGGGTTAA
ENSXETG00000003447	atp13a3	0.4913424236304482	ATPase type 13A3 [Source:Xenbase;Acc:XB-GENE-6045268]	ATGGAGAAAGGAGAAAAAATTAATAAGGGGGAGGAGGATGAAATGGAGATTGATGGATATAATCTGTGCCGCTGGAAGCTAGCTCTTGTAGCTATAGGAGTGTTGTGTAGTGGTGGCTTCCTCCTCCTCCTCCTGTATTGGATGCCTAAGTGGCGTGTCAAGGCAACATGTACTCGAGTGACACTGAAAGACTGTGATGTTGTGCTGTTGAGAACAACTGATGAATTCAGGCAATGGTTTTGTGCAAAGGTGCGCATTCTCTTGTCTCCGGTGACTCATCCATTCCAGATTCCTGAATCCGTAGCAGGCAAAGTGACAAATGGGCACATAGGACACCTTCCAGAGAGCCACACAGAGCACCATGAAGACCATCCAATGAATAATGCAACAGTTCCATTA…
ENSXETG00000002680	dennd5b	0.25438525506809884	DENN/MADD domain containing 5B [Source:Xenbase;Acc:XB-GENE-1009600]	ATGAGCGGCCCCTCGGGCACGGCCGGACCCCCCTGCCGCCTGGCTCATTACTTCGTTATCTGCGGGACGGACGCGGACAGTGGGCTCGAACCGGATGAACTGGCGGTTTTGTACCAGTGGCTCGAAGCAGACCGGCATGGCAAGGGCCACGACACAGGGGAAAACTTTGAGCAGAGTCCACTGAGGAGAACCTTCAAGTCTAAAGTTCTGGCCCACTATCCGCAGAACGTCGAGTGGAGTCCATTCGATCAAGATGCTGTCAACATGCCCTTTCCTTTACCCGACACCCCGTGGAAGCGGCTGCGTAAGGGAAAATGCCATTACAGAGCCGAGCTATTAAAGGGAAAGCTATCCCTACCGTTCCGTTTCTGTTCTATGGGCAGATTTGCTTGTTACTCA…
ENSXETG00000016774	azi2	-0.046320899054062364	5-azacytidine induced 2 [Source:Xenbase;Acc:XB-GENE-981676]	ATGGAATTAATACCAAATTCTTATTGTAATACATCTGACATGGATTCAGCCCTGGATGATGATATCTGCATCCTGACCCATGAGAAAGCCGACTGCATGCAGAGGAGAGATCAGCGCACTCCCTTCTCTGCTTCTTCTGGAGAGGCTTCTGTTGCCTCACATTTTGCACTTGTCACAGCCTATGAAGACATCAAGAAACGCCTGAAGGAGACTGAAAAAGAAAATTATAGCCTAAAGAGAAGGTTAAGGCAACTGGAAGAAAAGCTAAGTGGAAACAATGAAACAAGCATGGTGGAGAAAAGTCTTCAAGAAATGTATATTGAACGTGACAGTTTGCTAAACAGATTGAATATTATGGAAAAGGAGAGACTTGAATGTACAAAAACTCTGAATGAACAG…
ENSXETG00000018474	gars1	0.13302114454169298	glycyl-tRNA synthetase 1 [Source:Xenbase;Acc:XB-GENE-963079]	ATGCTTCTGCTCCGAGCCCTCCCCGCCCTCCTGCTGCACCGCCAGCCCCGCTCTCTACGCACCTCCCTCCTTCCTCTCCTCTCCCGGCGGGGCAAAGCCAGCTCCCCAGCAGCCCCAGCCCGACACCGGCAGCACCTCCGCCCGGTACCACTCACCCGTCCAGCAGCGCCCAGCAGCACCATGCAGCCCGCAAGTGTGGAGGAACAGCTGGCACCGCTCAGACTGGCAGTCAGAGAGCAGGGGGATATAGTCCGGAAGCTGAAAGAGGAGAAGGCGCCGCAGGTGGATGTGGATCGCGCGGTGGCGGAGCTGAAAGCGAGAAAAAGAACATTAGAAGCGAAGGAATTATCCCTCCAGCCAAAAGATGACATCGTGGACCGGGCTAAAATGGAGGACACG…
ENSXETG00000025651	eif4ebp2	-0.4249200617464584	eukaryotic translation initiation factor 4E binding protein 2 [Source:Xenbase;Acc:XB-GENE-485270]	ATGTCAGCCGGACACCAGCACAGCCAGAGCCGGGCCATCCCCACTAGGACCATCCCCATCAGCGACTCCTCTCAGCTACCTCATGACTATTGCACCACCCCCGGGGGCACCCTCTTCTCCACCACCCCTGGAGGTACTCGTATCATATATGATCGCAAGTTTCTCTTGGACCGTCGCAACTCCCCTCTGGCTCAGACACCTCCTCGCCGCCTGCCAGATATTCCAGGAGTAACCAGCCCTAACACTGCTGTAGAGGAATCCAAAGTAGAAACAAACAACTTGAACAATCATGACACAAAGACAGCAGCAGGTGATGATTCTCAGTTTGAAATGGACATCTGA
ENSXETG00000018984	tph1	0.13070075544516344	tryptophan hydroxylase 1 [Source:Xenbase;Acc:XB-GENE-996926]	ATGAACCCACCTGGTCTATGGAGGGTTAATGTTCCAAATCCCCCCAGGAGAATGGTGATACCCCCAAAGTACTCTAGTGTGGTCTTCTACTGTCCCCATCTCCTCCAACTGTCCCTATCTCCTCCAACTTTCAATAAGTCAACTTACATCAAGATCGAAGACAATAAAGAATATAACGACAATGTCTGCGAGAGGGGCAAGGCCTCCGTCATCTTCTCCCTGAAGAATGAGATTGGGGGGCTGGTCAAAGCGCTGAAGCTTTTCCAGGAGAAACACGTTAATCTCATTCACATCGAGTCCCGAAAGTCAAAGAGAAGAAACTCCGAGTTCGAGATCTTCGTGGATTGTGACAGCAACAGGGAACAACTGAATGAGATCTTCCATCTGCTCAAGCCCCAC…
ENSXETG00000007529	rap1gds1	0.16792181262591735	RAP1, GTP-GDP dissociation stimulator 1 [Source:Xenbase;Acc:XB-GENE-1004455]	ATGGACAATTTAAATGACGCCCTAGAAAAATTGAAGATCACTGGAACTGAGTGCACGTCTGACAAGCTGGATGGGTGTTTAGATTGTCTGCTTCAAGCTCTTGGCCATAACAATACAGAGAGCAGTGAAAAGATTCAGCAATCTGGGATTCTTCAGCTGTTTGCCAGTATTTTGAATTCAGAATCATCTTGTTCTTCGAAAGTCGCTCACATAGTAGCAGAGATAGCAAAAAATGAATTAATGCGTATACCATGTGTAGAAGCTGGTTTAATTCCACCACTGGTGCAGCTTCTACACTCTAAGGATCAGGAAGTTTTACTGCAAACAGGACGAGCTCTTGGAAATATATGCTATGATAACCATGAGGGCAGGCGTGCAGTTGACCAAGAGGGTGGTGCA…
ENSXETG00000037440	rbbp9	0.3453958613786281	retinoblastoma binding protein 9 [Source:NCBI gene;Acc:100491567]	ATGTCGGGGGCTGAATGTATACCTGTGAAAGCTGTCATAATTCCGGGAAACGGGGCAGGAAATGTAGAGCGCTGTCTGTGGTATGGATGGACCAAAAAGAGGTTGGAAAAGATTCCAAATTTTAGGTGTTTGCTTAAAAACATGCCAGATCCATTTACAGCAAGAGAAAATATATGGCTGCCGTTTATGGAATCAGAGTTGGAATGTGATGACAAAACCATAATAATCGGACACAGCTCTGGAGCTGCTGCAGCTATGAGGTTTGCTGAAACACACAAGGTTTATGCCATTATTTTAGTGTCTGCCTATACCTCGGACTTGGGAGATGAAAATGAGAAAGAAAGTGGCTATTTCAGCCGGCCATGGCAATGGGAGAAGATAAAAAACAACTGTGGTCAT…
ENSXETG00000030792	taar1	0.5554008498651486	synaptic vesicle glycoprotein 2C [Source:NCBI gene;Acc:100490137]	ATGGAAGATGCCTACAGGGATAGGACTTCATTAGTGAAAGGTGCTAAAGATATCGCCAAGGAAGCAAAAAGACACACAACAAGAAATACGAACAGAGCTGTGGACATAGAACGAGATGGGTACACACAACAGTCCCACAACCAGTACCACAACGAACAAGATGACAGATACTACTCGCAAGGAAATTATCATGAAGAAGCAAATGATGATGAAGGTTCAAGTGAAGCAACAGAAGGTCATGATGAAGATGATGAGATATATGAAGGAGAATATCAAGGAATACCTGGTATGGGGCAAGGCAAAGATGGTATGGTTGCTCTTGGACAACCTATGACTGATGAATACAAAGACCGGCGCGAGTTAGAAACCGAAAGGAAGGCTGATGAAGAAGAACTGGCA…
ENSXETG00000037229	NA	0.20658692123023611	histone H2A type 1 [Source:NCBI gene;Acc:101733656]	ATGTCAGGAAGAGGCAAACAAGGCGGGAAGACCCGGGCAAAGGCCAAGACTCGCTCATCTCGGGCTGGGCTGCAGTTCCCAGTCGGCCGTGTTCACCGGCTGCTGAGGAAAGGCAATTATGCTGAGCGGGTGGGAGCCGGAGCTCCAGTCTATCTTGCCGCAGTGCTGGAGTATCTGACCGCTGAGATCCTGGAGTTGGCCGGGAACGCTGCCCGGGATAACAAGAAGACCCGTATCATCCCCAGGCACCTGCAGCTCGCTGTGCGCAACGATGAGGAGCTGAACAAACTGCTCGGAGGGGTGACTATCGCTCAGGGCGGTGTCCTGCCCAACATCCAGTCCGTGCTGCTCCCTAAGAAAACCGAGAGCACCAAAGCGGCCAAGAGCAAGTGA
ENSXETG00000009883	osgepl1	0.12859856989151716	O-sialoglycoprotein endopeptidase-like 1 [Source:Xenbase;Acc:XB-GENE-948324]	ATGGTGTGCAGTTCACATCATCCCGGAAATTTCTCACTATATCTCCCATCATTTTGCTGTGTTACAAAAATAAAGACACTGCAGTGGAAAACTATGGCAAAATATATTTCTAACCTATCCAGGATTGCTGTTGTCAGAGGAAGAGTTTCAGTAAGTACTTTGGTGAAATATCCCAGAATAGTGCTTGGGATAGAAACAAGCTGTGATGATACCGGGGCTGCAGTTGTAGATGAAAATGGAACAATACTTGGGGAAGCCCTTCATTGTCAAAAGGACATACATTTAAAGACTGGAGGTATTATTCCTACTGTGGCCCAGCACCTTCACAGAGACAACATTACAAAAGTTGTGAATAAAGCCATCCATGCCAGCGGGATTTCTCCTTATGAACTTTCTGCT…
ENSXETG00000023748	nodal	-0.16032459899525814	nodal growth differentiation factor [Source:Xenbase;Acc:XB-GENE-483209]	ATGGCTGGGACTGCTGCATGGCTCCTGGGGCTGAAAGGAGCGGCTCCGTATCCAAGAGACAACGAGTTTAGTGGAAGTTGCTGCAAAAGGGAGAATGCCAGACGAGGAAACAGCCTGGGGTTCAACAGCTACCTGAAACACATGTCCAGCAAGCCTCAGGATCATGTCAACAGAACTAAGGCAGTGGGTTCCAAGGATTTTGCTGCTCTACCTCTGCCAAGCTACATGCTTAACCTCTATCAAAGCTTCCACCATTCAGAACTGAGCCATGGCATGGAGGCTGCTCCATCACCACCATCTAACCATCGATCTGATATTATCAGAAGCCTGGCTGCAAAAAGTTTTGACCATGGAGGAAGTTTGTGGACCCTTGTATTTGACTTCTCATCCCTCAGTCAA…
ENSXETG00000034602	eya4	0.128679851518228	NA	ATGGTACATAGTGTATATATCCTTATTGTATATCAACTGGGTTATTCCCCAGCACAATGTATTGACCCAAATCATTATATCCTTACTGTATATCAACTGGGTTATTCCCCAGCACAATGTATTGACCCAAATCATTATATCCTTACTGTATATCAACTGGGTTATTCCCCATCTGCCCCTGGGGGCAATACAGAGGGTCCCACTGCCCCTGAGGGCAATACAGAGGGTCCCACTGCCCCTCAGGGCAATACAGAGGGTCCCACTGCCCCTGAGGGCAATACAGAGGGTCCCACTGCCCCTGAGGGCAATACAGAGGGTCCCACTGCCCCTGAGGGCAATACAGAGGGTCCCACTGCCCTTCAGGGCAATACAGAGGGTCCCACTGCCCCTGAGGGCAAT…
ENSXETG00000003753	orai2	-0.1703873987964319	ORAI calcium release-activated calcium modulator 2 [Source:Xenbase;Acc:XB-GENE-5781666]	ATGTTCCCTGAGTGCGGAGTGGCAGCTAAATCCCGCCCGTGCCCCCCACAGCTGCAGGAGGAGGAGGTGTCCTACCCGGAGTGGATTAGCCGGAGTTACGTGGAGCTCATGAGTCTGAACGAGCACTCAATGCAGGCGTTGTCCTGGAGAAAGCTGTACCTGAGCCGGGCCAAGCTCAAAGCCTCAAGCCGAACTTCGGCGCTGCTTTCCGGCTTCGCCATGGTTGCAATGGTGGAAGTTCAGCTAGAAGCCGATCACGCCTATCCTCCTGGACTTCTTATTGCATTCAGTGCCTGTACCACTGTTCTGGTTGCTGTCCATCTATTTGCACTTATGATAAGCACCTGCATTCTCCCTAATATAGAAGCAGTGAGCAATGTACATAATCTCAATTCTGTG…
ENSXETG00000006632	grhl2	0.11995054889188314	grainyhead like transcription factor 2 [Source:Xenbase;Acc:XB-GENE-485995]	ATGTGCTTGAGGGTTATTCTATCACAAATTTCTTGGGTTTTTTGGCATTTTGTAAATAAAAAACATTGTTTTGGTTTTATTTATCCCCTTTATTTTAGTAAACGACTTGTGGTCTTGGTTCCAAATGACGCTGTGTTTAACCCTCGCCGTGCCTACACCAGTGAAGATGAGGCCTGGAAATCATACCTGGAGAATCCCTTAACGGCCGCAACAAAGGCAATGATGAGTATAAATGGGGATGAGGAAAGTGCAGCGGCCATTGGACTATTGTATGATTATTACAAGGTTCCAAGAGAGAAAAGGTTGTTATCGTTAAATAAAATAAACGAAGGCCATGAAGATCAGGATAAAAGAAATTGCCTTCCAGCCAATGAAACACCAAGCAACTTGAGCACAGGA…
ENSXETG00000005739	klf4	-0.1616585561835095	Kruppel-like factor 4 (gut) [Source:Xenbase;Acc:XB-GENE-1015049]	ATGGCTCTCAGCAGGACCCTGCTGCCCTCCATCTCAACCTTCACAGCGGGGACCCCAAGCAAGGACAAGGCACTGAGACAGGCAAGTTCAGGCAATAGGTGGAGGGAAGACCCACCCCACATGAAGAGGCATTCTGTGCCTAACCAGTCTCGTGCTTATGATGGTTTGGAGATGGATTCTCCAGCTCTGGTGACTCGAAGGGAACCTGAGGAATTTAATGAGCTTCTGGACTTTGATTTTATCTTGTCCAATTCCCTTATCCACCAAGAGTCCATGACTGTGGGTTCTTCTTCTTCATCTTCGTCGGTCACTGCTTCCTCACCTCCACCTCCTGCCACACTTCCTGATACAATGTCTGCTCTCTCGTCTACCACTTGCAACTTTGTATACCAGGTACGT…
ENSXETG00000036994	hist2h3c	0.14987381358106364	histone H3.v1 [Source:NCBI gene;Acc:100486653]	ATGGCCCGTACTAAACAGACCGCCCGCAAATCCACAGGCGGGAAGGCTCCCCGCAAGCAGTTGGCCACCAAGGCAGCCAGGAAGAGCGCCCCGGCCACTGGCGGAGTCAAGAAACCCCATCGTTACCGCCCAGGGACTGTGGCTCTCCGGGAAATCCGCCGCTACCAGAAATCCACTGAGTTGCTGATCCGCAAACTGCCTTTCCAGCGTCTGGTCCGGGAGATCGCCCAGGACTTCAAGACCGATCTGAGGTTCCAGAGCTCAGCCGTTATGGCTCTGCAGGAGGCCAGCGAGGCTTATCTGGTGGGGCTCTTTGAGGACACCAACCTGTGCGCCATCCACGCCAAGAGGGTCACCATCATGCCCAAGGATATCCAGCTGGCCCGCAGGATCCGAGGG…
ENSXETG00000026985	cmc1	0.3495907362962958	C-x(9)-C motif containing 1 [Source:Xenbase;Acc:XB-GENE-971040]	ATGGATTCTGCTAAGTCGGAAGATCAATTTCTGCGGCATGTGGAAAAAGATGTTCTTATTCCAAAGATCATGAGAGAGAAGGCAAGAGTGTTGTGTTCTGATAAAGTAGAAGCTTTTACAAAATGTTGCAAGGAGAGTGGCCTCCTGATGGTGGTGAAATGCCGAAATGAAAACGCAGCGCTGAAGGAGTGCCTGACTCTTCACTACAAAGATCCGGCTTTATATGAAGAATGCAAGCAGGAATATTTAAAAGAAAGGGAAGAGTTTCAAAAAACAGGAATCTCGTCAAAGAAAAGGCAAGAGAAAGTGCCAAATAGTATGTAA
ENSXETG00000000091	bap1	-0.04752654864108888	BRCA1 associated protein 1 [Source:Xenbase;Acc:XB-GENE-494978]	ATGGAAATACTTCTTTCCTTGAAGTTTCTTTGCCTTGCTGCCCCTTACATTGGGAATGCCCTCCCTGATTTCCTCCGGAGAGAATCCTCCCCCAGTCTTTTTAAAACTAAACTTAAAGACTCCCTTTTGGACGTCGATCGCGCAGGAAAGTCTCCACTTTGCTGGATGATACCTCCGTTATGGAAGATGAAGTTGTCAACAACATGTTCTTTGCCCATCAGGTATGATGGAAGATTATATTTGATAAAGTATATTTATTGTCTGATCCCTAATTCATGTGCTACCCACGCCCTTCTGAGTGTGTTGCTGAACTGTAGTGGGGTTCACCTGGGGCCCACACTGAGCCGCATCAAGGAATTCACCAAAGGATTCAGCCCAGAGAGCAAAGGGTATGCAATT…
ENSXETG00000026973	ubl5	0.4812549598413456	ubiquitin like 5 [Source:Xenbase;Acc:XB-GENE-997305]	ATGATGATCGAGGTTGTCTGCAACGACCGGCTGGGGAAGAAGGTCCGAGTAAAATGCAACTCGGATGACACCATTAAAGATCTAAAGAAACTCATTGCAGCACAAACTGGGACTCGGTGGGATAAGATTGTACTTAAGAAATGGTACACGATATTCAAAGACCATGTGACATTATGTGACTATGAGATTCATGATGGAATGAACCTGGAGTTGTACTACCAGTAA
ENSXETG00000023751	pald1	0.1707349548216596	phosphatase domain containing paladin 1 [Source:Xenbase;Acc:XB-GENE-5740535]	ATGCAGCAGTCCCAGCCATGGCGCTTGTGGAGTATGGGTACAACTGCCAGTGCAGCTCAGCAGGTGCCCTCAACAGTGCCCTCTAGTGAAAACGTTCAGGGTAATGGAAGTGGAAGCTCAAATGTTGAAGATCGCAATTCCCTGAGCACACAGTCATTTCAGAATGTCAGCATCCACAACAAGGCAAAGTCAATAATCACCAATAAGGTGGCACCTGTAGTAATCACGTATAATTGCAAAGAAGAGTTTCAGATTCATGATGATCTACTCAAAGCTAATTATTCAGTTGGAAGAATTTCAGAGACAATGCCAGAACACTATCTTGTCCAGGGTAAATATTTTATGGTACATGACGTATATAGCAAATTGGATGTGTTAAACACTACTAGTAGTTGTGGT…
ENSXETG00000005311	dcaf7	0.31809607592984535	DDB1 and CUL4 associated factor 7 [Source:Xenbase;Acc:XB-GENE-973762]	ATGTCCCTGCACGGGAAAAGGAAGGAGATTTATAAGTACGAGGCGCCATGGACCGTCTATGCTATGAACTGGAGTGTGAGGCCGGACAAGAGGTTCCGCTTGGCGTTGGGGAGCTTTGTTGAGGAATATAACAATAAGGTACAGCTAGTAGGACTGGATGAAGAGAGCTCTGAATTCATTTGCCGAAACACATTTGATCACCCTTATCCTACAACAAAGCTTATGTGGATCCCCGACACTAAAGGAGTATATCCTGATCTGTTAGCCACCAGCGGGGACTACCTCCGTGTCTGGAGGGTTGGAGAGACAGAGACCCGTCTGGAGTGTTTGCTAAACAACAACAAGAACTCTGATTTCTGTGCCCCCCTCACCTCATTTGATTGGAATGAAGTAGACCCC…
ENSXETG00000021517	ythdc2	0.20480714918832085	YTH domain containing 2 [Source:Xenbase;Acc:XB-GENE-5881731]	ATGTCACGCCCAAATAGCACTTCACCAAGGCCCAATGTTGTTAAAAAGCCAAGTCCTGCTAACCCAGGTCGCTCTAAGGGTCTTAAAGATATCCGTATAGATGAAGAAGTAAAAATAGCTGTCAACATTGCACTGGAGAAGTTTCGTTATAGTGATCAAAAAGAAATGGAATTTCCTTCATCGTTGACAAGTACTGAGAGAGCATTTATTCATCGACTGGCACAGTCACTGGGACTTGTGTCTAAAAGCAAAGGGAAAGGTCCAAATCGGTGCCTGACATTGAAAAAAAAGAATGGATCAGAAGCTTCAAGCTCGCTGATGTCCTGCACTCTGACCCAAAATACAAAGAAAGCAGTATGTAACCTCATCCAGAGATTTCCTCTCACAAATAAGGAAAGG…
ENSXETG00000006271	hps6	-0.12958048815316164	HPS6, biogenesis of lysosomal organelles complex 2 subunit 3 [Source:Xenbase;Acc:XB-GENE-854592]	ATGATGAAGTTCGGCCCTCCGCAGTTAGAGTGCGATTTCCAAGCCTTTGGCCGGCAGCATGTTCTTCGGGAAGCCTTGCACACCCCGGGGTCTCGGTTATACCACAGCCCGGACGGGAGGCACCTTTTCGTGCTGCTGCCTCACAAAGTGTTGTCATTCCTCCGCTTGCCTTCCCAAGCCCCGCTCTCTCCCTCCGCCTACCTGGAGAAGTCCTGGGCTGCACACTCCCCTCCGCTGTCGGCGCTTCTCTTCCCGCAGTGTGTCCCGCACGGCTGGGCGCTTACCCTGCTCTGGCAGAACGGCCGAACGGAGATATGGAGTCCGCCCAGAAGCGCCCTCAGTAAGGGCTGGGAGTTGCTACAGTCGCTGGATCTGTGCAACAGCCCCCGGGCTCGACTT…
ENSXETG00000009510	cnpy2	0.10812742099586367	canopy FGF signaling regulator 2 [Source:Xenbase;Acc:XB-GENE-943173]	ATGACTTCCCGAACATTCAGCTGCCTTTTACTCCCGATTGCATTGGTTGCTCTTGTTGGCTATGCCTGTGCTAGGAGGGGCCAAGATGTACATTGTGGAGCTTGCCGTGCTCTTGTTGATGAGCTGGAGTGGGAAATATCACAGGTGGATCCCAAAAAGACAATCCAAAAAGGATCTTTTCGTATAAACCCAGATGGCACTCAGTCAGTTATTGAGGTACCGTATGCAAGGTCAGAAGCACATCTGATGGAAGTACTTGAACAAATATGTGAGAAAATGACAGAGTATGGGGAGAAAATAGACCCATCAACGGACCGCAAAATTTATGTTCGCGTTGTGTCTCGTGATGGCAAAAAAATGGATGCATCTGGGACCAACATTGACATAGAAGTGACATCA…
ENSXETG00000012205	ero1a	0.27768213639182304	endoplasmic reticulum oxidoreductase alpha [Source:Xenbase;Acc:XB-GENE-978124]	ATGATGGTGAGTGGGTGCTGCAGGTTAGACATGAGCTCGTACGTCTCCGTGCTGGTCCTCTGCTCCTTGCTCTTATGGGGATCCAACTCTCAGCAGGAACAGTCCTCTGCTGCTCAGAGATGCTTCTGCCAGGTGACTGGCTACTTGGATGACTGTACTTGTGATGTAGAAACAATTGACCACTTCAACAATTACGGGCTGTTTCCTAAATTACAACAACTGGTGGCCAGCGACTATTTCCGATACTACAAGGCGAACTTAAAAAAACCATGCCCGTTTTGGGAGGATAACTCTCACTGTGGTGTAAAAGATTGTGCTGTGAAACCATGCCCTACTGATGAAGTTCCAGGACTTAAACCTCCAGGATTTAAGTACACAGAGGAAGCAAATCGTGCACAT…
ENSXETG00000025109	ankar	0.40873994013227	ankyrin and armadillo repeat containing [Source:Xenbase;Acc:XB-GENE-1010351]	ATGGACAAGTATAGGTCAGTAAAGATGGTAGCAAGTAAACCACCTGTGAAAGATGAAACCTTTATTGCTGAAATGTCACTTCAGAGAAACGCTCATGCCTTTTTTGAAAGATTCAGTCAAAGCGAAATACAAGAACTTTTAGTTTACACCACATCAAGTTGGCTTGCTAACATGGAAGACATCCAGTTCCAGCTTCCAAGTGGTTTGATATGTCAGATGAAAAATCAATGTAATTCCAGTGTATTTCTGCTAGCTCCTGTGGAATCTGAGGTTAGACTTGACTACCGAGATGTTCATCAGATAATAAGGGAACTGGCCGTTGGAATTTACTGCTTTAATCAAGTTCCCTCCATCAGTCTAGATGCTAATTATGACCGAAGCACATCTTGCAATATTCCT…
ENSXETG00000020627	lpar2	-0.21943394192352045	lysophosphatidic acid receptor 2 [Source:Xenbase;Acc:XB-GENE-5791365]	ATGAGTCAGTGCTTTTATAATGAGAGCATAAAGTTCTTCTACAACAATAGCGGGAAAGAACTCTATGACACATGGAGGACCAAAGACATGCTGGTGGTGGGCTTGGGACTTACAGTGTGCGTCTTTGTGTTGTTATTCAACCTGCTTGTGATAGCAGCCATTATCATCAACAGACGATTCCACTATCCAATCTACTATCTCCTGGGGAACCTGGCTGCAGCCGATCTGTTCGCCGGGGTTGCTTATACATACCTCATGTTCCACACGGGTCCAAATACGTCTAAACTAACAATAAAGACCTGGCTAGTTCGACAGAGTCTGCTGGACACTAGTTTGACAGCATCGGTGGCCAACTTGCTGGCCATAGCTGTGGAGAGGCACCAGACAATATTTACCATG…
ENSXETG00000026450	pold3	0.15772829543480568	polymerase (DNA-directed), delta 3, accessory subunit [Source:Xenbase;Acc:XB-GENE-1017222]	ATGATGGACAGGGACAAAAACCGGGTGACTGAGAAGATCTTGGACCTCACCCTGGAGATTATCTGCCTGCTGACAGGGGAGGACTATATTGTTGTGAAGAAGACAGACCATGACCAAGATCTGTGCTTGGCACATCCACTGGCATCACTCATGCAAGAGAAGAAAAAAGACAAGAAGAGCCCAAAGCTAACAGACAAGATCCATAAGAGATCCACTACAGAGGTTCCAGCCTATTGTCAGAACAACGGTGCATGTCCCCCAGCAGCGCAGCCGGAACCTTCCAAAAGGAACATGGAACAGTATGAGGATGTTGCCATGGAAAATCAAGAGCCTCTCTGCCCCGGGAATATCTGCAGTGCTCCAGAGAGATGCCCTGTGCCCCCATTCCCACAGGCTGGT…
ENSXETG00000006272	NA	0.26783934013232413	prominin 3 [Source:NCBI gene;Acc:100488690]	ATGGAGTTCACAAACATAACAACACCAAACTATAGACCAGAAGCTGACCCAGCTAATGGCATTATTAAAGTTTTTCGGGATATGGTACACTCCTATCTTAATATTGTACAAAGAAATGCTTTCCCACCAGATTTTCTTCAAAACCTGCAAGACCTGCAAGACACATCTCAAAATTCCAGTGAGACAGTTAAAAAGGCCCTGACCTATGAAATTGGATTCCTGGTAGCTCTGGCTTTTGGAGTCCTGTTTTTTGTACTTATGCCTTTGACAGGATTTTGTTTTTGCTGCTGCCGATGCTGTGGGAACTGTGGGGGGAAGATGCATCAGAAACAGACAAAGAAGATGGCCTGCAAGCGCAGATTTATTTACATTTTCCTACTTTGTATAACACTTATTATG…
ENSXETG00000004913	dgkq	0.19170104367252913	diacylglycerol kinase theta [Source:Xenbase;Acc:XB-GENE-868466]	ATGGCTGCAGACGGAGCTAGATCTCGGTTTGGCAATCTTGGCTATCGCGGAGGTGGAGGCAGCAGTAACAGCAGCCCGTCTTCCAGCCCCAAGCTCGGAGGGGGAAAGATCAGGACCCCGCCGCTACAGCAAAGGCGAACGGCATCCCCCCACTCTGGCTCCTCGTCCTCCTCTTCACCTGGAGCCAAACACCAGCAGCTCAAACAGGCGCCCTTCTCCCCGGCTCACAGCTTCAGGAAAGTCACCCTCACCAAGCCCACCTTCTGCCACCACTGCACAGATTTTATATGGGGGCTCGCCGGCTTCCAGTGCGAAGTTTGCAACTTCATGTCTCATGAAAAGTGTCTTAAACATGTGAAGACTGTTTGTTCATGCATGGCTCCAAGTCTGGTGAGGGTT…
ENSXETG00000000782	anapc1	0.4418462004720347	anaphase promoting complex subunit 1 [Source:Xenbase;Acc:XB-GENE-5894738]	ATGTCGAACATCTATGAAGAAAAACAAACAATGATTGCAGCAGGGGATTTGCAGGAGTTTGTTCCTTTAGGCCGTGACCACAGCAAGCACCACCCCAATGCACTGAACCTTCAGTTACGGCAGCTGCAGCCAGCCTCTGAACTGTGGTCCTCTGATGGGGCAGCAGGCTTGGTAGGATCACTTCGGGAGGTAACCATTCACGAAAAGAATAAGGAAAGCTGGCAGCTAAGGAAAGGTGTTGGTGATCCTGGAGAAGATGCAGAGTATGATGAAGAACTATATGTAGCTGGGAATGTGGTGATATGGAGTAAAGGGAGTAAAATCCAAGCATCTACTGTATATAAGGCATTTACTGTTGACAGCCCAGTGGTACAGGCTCTGTGGTGTGATTTTACCATA…
ENSXETG00000031488	pcdh19	0.33048263317201987	protocadherin 19 [Source:NCBI gene;Acc:100494505]	ATGTGGTTGTGGCTGAGCAGGGAGATGGATTTGTTGCACATTTTGCTTTTGCTGGTAGTGTCCTGGACTCGATCCCGAGCTCTGATCAACTTGAAATACACAGTGGAGGAGGAGCAGAGAGCTGGGACTGTAATTGCCAATGTAGCTAAGGACGCTAAAGATGCTGGCTTTGTGCTGGACCCCAGGCAGCCTGCCTTCAGAGTGGTCTCTAACTCAGCCTCCCATCTGGTGGACATCAATGCATCGGGCTTGCTAGTCACCAAGCAGAAGATAGACAGAGATATGCTGTGCAGGCAGATCCCCAAGTGTGTCATCTCATTGGAGGTCATGTCCAACTCTATGGAGATTTGTGTCATTAAAGTAGAGATCAAGGATCTTAATGATAATGCCCCCAGTTTT…
ENSXETG00000005467	mtap	0.2579713260618933	methylthioadenosine phosphorylase [Source:Xenbase;Acc:XB-GENE-971776]	ATGGCTGGTGTTTGTGCAGTGAAGGTTGGGATTATTGGTGGATCTGGTTTGGATGACCCTGATATTTTGGAAGGAAGATTAGAAAAATATGTTGACACCCCATTTGGCAAGCCATCTGATGCATTGGTTTTAGGAAAGATAAAAAATGTGGACTGTGTTCTGCTTGCAAGGCATGGTCGGCAGCATACCATAGCACCCACAAATGTTAACTACCGTGCCAACATCTGGGCACTGAAATCAGAGGGATGTACCCACATTTTAGTAACTACGGCTTGTGGATCCCTGAGGGAAGAAATTCAACCTGGAGATATTGTCATAGTGGACCAGTTTATTGATAGGACTACCAAAAGAGAGCAAACATTTTATGATGGAGGACCTTCTTGTCTACCTGGAGTGTGT…
ENSXETG00000028016	znf333	-0.822194068644825	zinc finger protein 333 [Source:Xenbase;Acc:XB-GENE-1015481]	ATGAATGAAGATACATGCCCTTGTCCCAGAGGAGTGGAAAGCAAATCGAGTGGCCACAGAAAGCAGAGGAACCCTAGGCGAATATCTCCTGTGGCTTTTACTCTGACAGGAAGAGAAGGTGCAACAACCACACCTGAGTATAATATGCGAGATCGTGTGGCTTTGAATTATGCGTTTGACGTAAATGATGATACTGAGGATCCAATCAAAACCTCTAACTGCTCAGATTGCACGCTGCGGCTCAGAGCTTCGTCTTCCAGGAAACAATACCTCTGCCATGACTGCGAGAAGTCTTTCTCTGATAGTTTTAGGCTGACTATTCACCAGAGGAGCCACACGGGGGAGAGGCCGTATGTGTGCACCGACTGCGGGAAAAGTTTCACCCAGAGTTCCAATCTT…
ENSXETG00000009881	XB5749127	0.27767317733791985	uncharacterized XB5749127 [Source:Xenbase;Acc:XB-GENE-5749128]	ATGAAAGTTGTTATTCTTGCTGCTGGTTATGGAACAAGACTGCTTCGCGATCTGCAAAATCAGGAAAAGTTTGCACAGCTGATTAGCATCCCAAAACCTTTGCTTCCCATTGGTGGACTCCCTTTGATTTCATATTGGGTAGAAGCCTTGAAAGCAAGAAATGACGTTTCAGATCTTACCGTGATTACCAATGATCTTTACTTAAAAAAATTCAAGGACTGGGCACAGAAATATCCTTACATTACAGTCCTAACTGATGGGACATCCTGCAATGAGGATCGTTTAGGTGCTGTCTTTTGCCTGCAGCTAGCCATTGAACAACTAAAAGCAGATGATCATGTTATGGTGATTGGAGGGGATACATTGTTTTTTGAGGATTTCCATCTTAATGAAGTTGTA…
ENSXETG00000033126	acsl3	0.4514332556302856	acyl-CoA synthetase long chain family member 3 [Source:NCBI gene;Acc:100036652]	ATGAATAGGATTGTAATAGTTATAAAGGAAGATATGAATCCAGTTCTTCTCTACCTTCTACATTTTTTCATGTGGCTTTATGGGGTTGTTACATTTGTGCCGTGGTTCTTGCTGTCAGGTGCCCGAGACAGGCAGGCCCGGGCCAGTCGTGTAAAGGCAAAATCTGTGGCCGACAAGCCAGAGAGTGCGTATAGATCAGTGGACAGCTTCCATTCGCTCGCCTCTTCTCTGTACACAGGATGTGACACCCTTGACAAGGTCTTTAAACATGGTACTGAACTATTCAAACACAAGGACTGCTTGGGAACACGAGAGGTGCTGAGCGAGGAAGATGAGGTCCAGCCTAATGGCAAAGTTTTCAAAAAGGTGATCTTGGGAAGGTACAACTGGATGTCCTAC…
ENSXETG00000034740	shisa7	0.2589643603101047	uncoupling protein 3 (mitochondrial, proton carrier) [Source:NCBI gene;Acc:100495495]	ATGGTTGGACTGAAGCCCACGGAGGTGCCACCAACCCCACTGGTCAAGTTTGTAGGCGCCGGCACTGCGGCCTGTATAGCCGACTTATTCACCTTTCCCCTGGATACTGCCAAAGTACGACTACAGATACAAGGAGAGGGGACATCTGTGAAGGACACCAAGGTTCTTCGTTACAAAGGCGTTTTTGGCACAATCAAAACCATGGTGAAGACGGAGGGGGCAACCAGCCTGTACAATGGGCTAGTGGCCGGCCTACAAAGACAGATGAGCTTTGCCTCCATCCGGATTGGTCTCTACGACTCTGTCAAACAGTTTTATTGCCGCCAATCGGAAAGTTCCGGAGTCGCTTGCCGGCTGCTGGCCGGATGTACCACGGGGGCCATGGCCGTCACCTTGGCT…
ENSXETG00000033434	isoc2	0.2680761746611676	calcium voltage-gated channel subunit alpha1 B [Source:NCBI gene;Acc:100489231]	ATGGGTAGGGGGTGCCATAGTGTTTCCCTTAGACAGTACAGTATGGGGGTACAGCTTATTGTGTGCCCAGAACATTCCTTCTCTGCATATTTGTATTTTATACATATGGGTAGGAGGTGCCATAGTGTTTCCCTTAGACAGTACAGTATGGGGGTACAGCTTATTGTAAACGTGTTGACCATGTCTTTCTTCTGCCCTTCATTTCTTTCCTTCTGTAGCAAACAGCAGAATTCGACCAAGTGTCGCTCCGTGTGGGAGCAGCGAACCAGCCAGATTCGAAAGCACAATTTCCGCGCCAGCTGTGAGGCCCTCTACAGTGAGTTGGAACCCGAGGACCGTCTGCGTTATGCCACCACCCTACACCTAAGGCCTGATATGAAGAGTCATATGGACCGGCCA…
ENSXETG00000026447	ucp2	0.13469018935682117	uncoupling protein 2 (mitochondrial, proton carrier) [Source:Xenbase;Acc:XB-GENE-1010081]	ATGGTTGGATTCAAGCCCACCGACATCCCACCCACAGCGGCCGTCAAATTCGTCGGCGCTGGGACAGCAGCATGCATCGCCGATCTGTTCACCTTCCCTCTGGACACGGCCAAAGTCCGACTCCAGATTCAAGGAGAGAACAAGGTGGTTAACGTGAAGGCGGCCCAGTACAAGGGAGTGTTTGGCACCATCTCTACCATGGTGAAGACGGAAGGGCCCAAGAGTCTGTACAACGGCTTGGTTGCCGGCCTGCAGCGCCAGATGAGCTTCGCCTCCGTCCGGATCGGACTCTACGACTCGGTCAAGCAATTTTACACCAAAGGATCCGAACATGTTGGGATTGGGAGCAGGCTGGCTGCTGGGTGCACCACGGGTGCTATGGCAGTGGCAGTGGCCCAG…
ENSXETG00000016662	cdr2	0.02584455647888459	cerebellar degeneration related protein 2 [Source:Xenbase;Acc:XB-GENE-970806]	ATGCTGACCGACAGCAACGTGGAAGAGTTCGAGATTAAGGAGGATGAGCCGTGGTACGACCAGCACGACTTGCAGCAAGATTTGCAGCTTGCTGCGGAACTGGGCAAGACATTACTGGATCGCAACACGGAACTAGAGGAATCCCTGCAGCAGATGTACAACACCAATCAAGAACAGTTCCAAGAAATTGAATACCTCACAAAGCAAGTAGAGCTCCTGCGTCGGATGAATGAGCAGCATGCCAAGGTATATGAGCAACTGGACATCACTGCCAGGGATCTGGAGAATGCTAATCAGAAGCTGGTACTGGAAAGTCGGGCTTCACAGCAGAAAATAATGAGTTTAACAGAAACAATAGAAAACCTGCAAGTCCATATTGAGGAGCTTCAGAGACAGGTG…
ENSXETG00000009878	asnsd1	0.002609941728728943	asparagine synthetase domain containing 1 [Source:Xenbase;Acc:XB-GENE-940928]	ATGTGTGGCATTTGTTGCTTGGTTAGTTTTGCAGGTAGCTCTATAGACAGATCATGTCTTCAGGATGATGAAAATCTTAGAAACAGAGGTCCCAGCAGCAGCCAACAGCTAAATAGGAATAACCCATCACATGGATACAATTGTTATTTCTCTGGACATGTTTTACACCTTAGAGGACCGTTGACACCTCAGCCTCTGAAAGACAAAAATGGAAATGTGTTTCTATGGAATGGAGAGTTGTTTGGTGGAATTGAAGTACCATATGCTGAAAATGACACTCAGATAATGTTTCAGCACCTCTCTAAATGTGATGATGAATCCAAAATCATGTCTCTCTTTGCTAAGGTGAAAGGTCCATGGGCCTTTATCTACTATCAGGCTAACTATCACCAATTATGG…
ENSXETG00000012189	bicdl1	-0.1614804039341679	BICD family like cargo adaptor 1 [Source:Xenbase;Acc:XB-GENE-5811431]	ATGGAGCTTCCTATCAGCTTCCTGTCAGACAGCAGCCGCCCTGCAGCCTCCTCGGAGCGGGGAGATCAGGCAGCTTTGGGGCGGGGGGAGCTAGAGTTTGATGAGGAGCTGGTGTTTCTGGCAGCTGAAGGAGAGGGGGACCCTGAAGAAATTGAGGGCCCGGAGGTGAGGGAACAGTCGGAACTTCTGTGCATCATAAGGCAGAAGGAGAAGGATCTGGTGCTGGCAGCCAGGCTGGGAAAGGCGCTGCTAGAGAGAAATCAGGACATGAGCAGGCGCTATGAGGAGATGCAGAGAGAGATGACCGACAAGCTGGAGCATCTGGAACAAGAGAAACATGAATTAAAGCGCAAACTGGAGAATCGTGAGGGAGAGTGGGAAGGAAGGGTGTCAGAACTG…
ENSXETG00000020566	gmip	0.21908324333254434	GEM interacting protein [Source:Xenbase;Acc:XB-GENE-977540]	ATGAGGAGCATCTACCAGGGATCAGGTTTCCCCACTTCTGACCAGACTGGGGGGAAGTTATCTGCTTTACTTCAGTCTGTTGTATTTCTCCTGTACAAATATCCAGCTCTCAACTCCCGTTGTGTGCAAGAGGCTATGACTACCCTTATACACGGAGTGCGAGTTTCAGATACCAGCACACCAAGTGGCTCCTCGGAGGGTCGGAAGAGATTCAGTGAAATATTCCGAGATTTGGATGCACTGGAGATAAGCCTTGGAAACGAGACGGTGGAAATGTTCTTGAATGATTCAGAGCAGTTGGAATCCCATCCAGATGAGGAAGAGGAGTCACTGATCAGCACACCGTTGGAGCTATCACGGACATCAGCTGATCACGTTGAGGAAGCTGATGATGTCCTG…
ENSXETG00000015477	ddx3x	0.3061076843033138	DEAD-box helicase 3 X-linked [Source:Xenbase;Acc:XB-GENE-999731]	ATGAGTCATGTGGCCGTGGAAAATGTCCTCAGTCTAGACCAGCAGTTTGCTGGCCTAGATTTGAATTCAGCTGATGCCCAAAGTGGTGGTTCTGCAACAAAAGGACGTTATATCCCTCCACATTTGAGAAACAAAGAAGCCTCAAGGCAAGGTTATCCAAGGTGTCAATACCCAGCAGTAGATGTGTATAAGGGATACGGTGATTGGTGGTCCCAAAGAACTGACGCCAACTGGGACGCTGGCCGTGGCGGGAATGGCTACGTTAATGGTACAAACGATGACCGTGACAGTCGCATGAATGGTTATGATCGAAGTGGCTATGGAAATCGTGGTTCTGGACGAACTGACAGAGGCTTTTATGATAGAGAGAATTCTGGGTGGAATTCAGGCAGAGACAAA…
ENSXETG00000005305	crhr1.2	0.2700519982064432	corticotropin releasing hormone receptor 1, gene 2 [Source:Xenbase;Acc:XB-GENE-968267]	ATGGCAGCAGCCCTGTGCTACAAAAGACATTACCTTCATATTCTCCAGCTGTTTATCATCTGGGCCCGTACCTGGCTCTTGCACCCCAGATCAGCATATATACATTCACATACATGCTCAGATCATACATACATACACATCCATGCAGCAGTCCTGTTCTACAAGTATACTGTCTCCTTTTCTCCTACAGGTCTCGCCTGTAACGCTTCCATTGATATGATCGGCACTTGTTGGCCTCGCACTGCAGCTGGACAGATGGTGGCCAGACCCTGCCCTGAGTACTTCCAGGGGGTGCAATACAATACAACAGGGAATGTCTACAGAGAGTGTCACCTGAACGGCAGCTGGGCTGGGAGAGGAGACTACACTCAGTGCCAGGAGATTCTGAAGCAGGAGAAG…
ENSXETG00000016188	slc26a6	0.22672103259317086	solute carrier family 26 member 6 [Source:Xenbase;Acc:XB-GENE-919879]	ATGTTTTTTCTCTTTTCCAGATGTTCGGTATCTGCAGCTAAGCACATACTCTTTCAGTTCATTCCTATTCTCCACTGGTTGCCCCGTTACCCTGTCAAGGAATGGCTTCTGGGCGATATTGTGTCTGGGGTGAGCGTGGGAATTCTCCAGCTTCCACAAGGTCTGGCGTACGCTTTACTGGCTGGAGTGCCCCCAGTGTTTGGATTGTATTCATCTTTTTTTCCAGTCATGGTCTATTCCATCTTTGGGACATCTAGACATGTATCTATAGGAAGCTTCGCTGTTGTCTCCATCATGATTGGCAGTGTGACCGAGTCCTTGGTGCCCAATGATAACTTCATTTTGCCCGGAAATGACAGCCTACATATTGATACAGTTGCAAGAGATAAAGCCAGGGTT…
ENSXETG00000016661	NA	0.05016431225500936	transmembrane protein 180 [Source:NCBI gene;Acc:100486607]	ATGGCCTTGTTGTTTGGAATCAATAGGCCTGCAGTGGCTTATTCTATGACCACGCTTGGTTCAGGGATGATGAACGCTGTATTTTATTTCTACTATGTGAAGCTTTTCCTTAACCGGTACAAGATATCTGAGGTTGCGTTTCATCAAGCACAGGTTGTATTCATGATTTGGAATGCCATCAATGACCCGCTGTTTGGTTACATACAAGATAACTCCAAAGTACAGTGCTGCAATCGACGTCGCCATTCCATACTGTATGGAGCCCCATTGTATGCCTTAGCCTTCCTGCTTCCCTGGTTCCCATGGAAAGATTATTCTGCAGGTGAATGGCTTATTGGCCTTCATCTTGTGGTGGCACTGTGTGTGTTTGACGGCATGCTTACATTTGTTCTTCTAGCA…
ENSXETG00000030725	tmem44	-0.004669406416109606	transmembrane protein 44 [Source:NCBI gene;Acc:100145595]	ATGGACGAGACCAAGAATGGAAGCGCCGATAGCGCGGGGGGAGTCGGAGTATGGAGCTGGGACTATATGATCGCCTGCTTCGCTGAGGAAAAAGTTTGCGTGTCCTTCGTGCTGTGGCTCCTTTCCTGCATCTTCTGGCTCACCTCCTGCTCCATACAAATTAACTTGCGATGTACAAGGAAATCCAGTCATGAGGCAACCGTGTTTTGGGATATATATAGATTTTTTGGCTCCATGTGTAACACTATTGGAGCACTGCTGTCCAAGCAACTCACTATCCAGGTCATTACTGGATTCTATATGGCCTTAACAGATGTTGTACACTTTTTATTAACCCTTTTCCCTGTTTGCACCTACAAAGATAGACCCCGATCTAACCATCGTTCTCGGACAAGGAAA…
ENSXETG00000041077	spint2	0.014786540938415443	NA	ATGAAGTCCAAAGAACACACCAGACAGGTCAGGGATAAAGTTATTGAGAAATTTAAAGCAGGCTTAGGCTACAAAAAGATTTCCAAAGCCTTGAACATCCCACGGAGCACTGTTCAAGCGATCATTCAGAAATGGAAGGAGTATGGCACAACTGTAAACCTACCAAGACAAGGCCGTCCACCTAAACTCACAGGCCGAACAAGGAGAGCGCTGATCAGAAATGCAGCCAAGAGGCCCATGGTGACTCTGGACGAGCTGCAGAGCTCTACAGCTCAGGTGGGGGAATCTGTCCATAGGACAACTATTAGTCGTGCACTGCACAAAGCTGGCCTTTATGGAAGAGTGGCAAGAAGAAAGCCATTGTTAACAGAAAACCATAAGAAGTCCTGTTTGCAGTTT…
ENSXETG00000014581	akap11	0.06814547301148419	A-kinase anchoring protein 11 [Source:Xenbase;Acc:XB-GENE-968300]	ATGGCCACTTGCACAAGAAAACAGGGATGCCAAGCGAAGCCTAAATTATCAATGAAAAAGGAAAATATAAGCGATGCCTTTTTGATGTCACTGAAGTCACTATTGGAAAGCAAGAAAGAACTGTGCAGAATTGCAGAGGGTTTCAAAGGTGTCAAGAAAGAAAATGTAATGGAGCTTACATTTCTTGGACTTTCTGAGGAGTCAGAGCCTCTTCAGGATGTTGAAGCTTTACACCTGGATCTGCCAGAACTGATCAGATCACTTCATCTCTGCAGTTTAAATGACTGCGAAGTTATCCTGCTAAAGCATGGCAAAGAAGGTACAACATCTTGTGCAACCCAGGGTTGTTTTTCTGGAGCACTGTGTGTCATGTCATCTCCCACCTTTACATATTTAAAA…
ENSXETG00000016137	grap2	0.0013066696833464453	GRB2 related adaptor protein 2 [Source:Xenbase;Acc:XB-GENE-6086850]	ATGGAAGCCCAGGCAATGTACGAGTTTAATGCCTCTGGGGAAGATGAACTGAGCTTCAAAAAAGGAGACGTGCTAAAGATATTAAGTTCTGACGATAACTGGTATAAATCTGAACTCAATGGATCTGAAGGATATGTTCCCAAAAACTATGTGGAAGTGCATTTCCCCAGGTGGTACTGTGAGAACATTTCCCGTGGAGAGGCTGAGAGTATACTCATAGGCAGATTTGTGGGAGCATTCATCATACGTGCCAGCCAGACTTCTAAAGGGGAATTCTCTATGTCAGTAAGGGATGAAGATGATGTGCAGCATTTCAAGGTCATGAGGGACATTCGAGGCAACTATTACTTGTGGACAGAGAAGTTCAAGTCCCTTAATAAGTTAGTGGAGTACTACAAA…
ENSXETG00000016660	mettl9	-0.1316191827134125	methyltransferase like 9 [Source:Xenbase;Acc:XB-GENE-5749473]	ATGAAACTGTTCGTGTGCTGGATAATTAGCTACCTGCTCTGCCTGGCCGGGCTGAGGAAGATGTGGAGTGGCCGGTACCTGAGGAGTCACCTCAGCAGATCCCTGTACATGAATATGATGAGCCACAGCCAGGCCCCGTACTGGGATGGGAATCAGCAGTGGTACTTTTGCGACACAGAAAAATTAAGTGATTGCCTTCGGCCGGTTTTCATCCAGAGTTACTTAGACCATGGAACCCAGACATTCCTGAACAGAAGTATTGAGAAATCTGGCTGGCTTTCCATTCAGCTCTACCATTCCTTCATGTCCTCTGTGTTCAGTATGTTTATGTCCAGAACATCAATCAATGGGTTGCTTGGAAGAGGGTCAATGTTTGTGTTTTCACCAGAACAGTTCCAA…
ENSXETG00000001714	ldb1	-0.14197033627999905	LIM domain binding 1 [Source:Xenbase;Acc:XB-GENE-493239]	ATGGCAGAAGAATTTGAGTTGGCAGGCTGTTCCTCTAAGTCATTCAAGCTGTACTCACCAAAGGAGCCCCCCAACGGCAACGCCTTCCCCCCCTTCCACCCAGGCACCATGCTGGATCGAGATGTGGGGCCCACCCCGATGTATCCACCAACATATTTGGAGCCCGGGATAGGGAGGCATACGCCATATGGGAACCAGACAGACTACAGAATATTTGAGCTGAACAAACGTTTGCAAAATTGGACAGAGGAATGTGACAATTTGTGGTGGGATGCTTTTACCACAGAGTTTTTTGAAGATGATGCAATGTTAACCATCACTTTTTGTTTGGAGGACGGACCAAAGAGATACACAATTGGACGGACGCTGATCCCTCGGTATTTCCGCAGCATCTTTGAG…
ENSXETG00000020966	kdm2b	0.01874583269425298	lysine (K)-specific demethylase 2B [Source:Xenbase;Acc:XB-GENE-990506]	ATGTACGCAGAGCACGAAGACCTGTCAGACGTGGAGGACATGGTGAGCATCAGGGGCTTCAGCCTGGAGCAGAAGATCAGCAGCAACTCCTACCGAGGGGACTTCGTACGCTACATGGAAGGCAAAGAATTTACCTATGAATATGTTCAGAGAGAAGCCCTTCGAGTACCTTTACTTTTCTCCACCAAAGAAGGACTGGGTATTAAAATGCCAGGACAAGATTTCACTGTTCGGGATGTGAAGCTCTTAGTTGGAAGCCGCCGGGTAGTTGATGTGATGGATGTGAACACTCAGAAGAGCATAGACATGAGCTTGTCACAGTTTGTTCGATACTATGAAACACCAGAAACGGAAAGGGAAAAACTGTACAATGTGATCAGTCTGGAGTTTAGTCATACA…
ENSXETG00000020685	pcca	0.5063485057322885	propionyl-CoA carboxylase subunit alpha [Source:Xenbase;Acc:XB-GENE-944987]	ATGACGCACTTTCGTCAGCTGTGGCACTCACTGGCAGCAATGGCGGCGCTCAGGGTGCTTGCAGATGTGCAGAAACTGGTGTTAACCTGGCAGCAATCCACCATTAGGTCAAGATGGTGCTGCTTGTCATTTGTCCAGTATTCAACAGCTCATGATCCTAATGAGAAGACATTTGACAAAATTTTAATCGCAAACAGAGGAGAAATTGCATGTAGAGTCATAAAAACGTGCCGAAAAATGGGTATAAAAACAGTTGCTGTACACAGTGATGTTGACTCGGCTTCAGTTCATGTGAAAATGGCCGATGAAGCTGTCTGTGTTGGCCCAGCTCCCACAAGCAAAAGCTACCTCAACATGGATGCCATCATGGATGCCATTAAGCACACCGGTGCACAAGCT…
ENSXETG00000034556	fam83f	0.1275589566434304	family with sequence similarity 83 member F [Source:NCBI gene;Acc:101732355]	ATGGCCGATTCCCAGGTGGAGTGCCTGCAAGACGATCATGTTAATAGGAAGGTGACAGAGGATATGTGCCAGTTCTATTACAGTGAGGAGCACCGGCGCTGTCTGGAGGTGCTTTCCCAGCATGGGATTCAGAGTTACAGGGAGTACATTAAGGAGTTGAATATTAGGGGCTTCCTATCCACCAAGGAACTCATTGACTTGAAGAATTCATGGAAAAAATACGACACTGAGCCAAAAAGCCCCAAAAAGGCAAAGCCAAAGTCCAACAAGCTAGACCTGGAGCCCAAAGAGGAAAAAGTCTCTCTGCAATACTGGCCTGATAAGTCCGATACGGAAATCCCACCCCTGGACCTTGGCTGGCCTGAGAATGGTTTCTATAGAGGGGTCTCCCAGATGCTG…
ENSXETG00000003451	lsg1	0.11374709928336255	large 60S subunit nuclear export GTPase 1 [Source:Xenbase;Acc:XB-GENE-990730]	ATGGGGAAGAAAAAAGCAACGTGCGGCCTTGGAAGAGCACTAATCAAAGAAAGAGCCCAGAGCCAACGTGGACTGAGGGCGAAAGATTCATGGCTCCACACCAGTGAATTAAATGATGGATATGACTGGGGTCGGTTGAATTTGCAGTCTGTGACTGAGCAAAGCTCTATTGATGACTTTCTTGCAACAGCAGAACTTGCAGGGACAGAGTTTGTTGCAGAGAAACTTAATATTAAGTTTGTCTCTGCTGAGGCAAGAACGGAATTGCTTACAAGTGAGGAGACCAAGAGGATTCATAAACTCCAAGAGGAAAACAAACAATTTTTGTGTATTCCAAGAAGGCCTCACTGGGATGAAAGCACCAGTGCAGAAGTTCTCAGGGAGACTGAGAGAGAGACC…
ENSXETG00000012541	dnajb13	0.20224833772529535	DnaJ heat shock protein family (Hsp40) member B13 [Source:Xenbase;Acc:XB-GENE-996716]	ATGCCAGTGACAGGAGAAGGCGGACTGCGGCTCCCAGGGTACACCGCGGCGAGGGTTGCCATAGTAACCCAGAAAGCGTATAGACTCACAGGAGGAGAAGCAGCCATGGGGCAGGATTATTACTCTGTGCTGGAAATTACTCCTAGTGCGGGGGATTCCGACATTAAAAAGGCGTACCGCAAGTTGGCCCTAAAGTACCATCCACTCAAGAACAAGGAACCCTCCGCCCCACACAGATTCAAACAGATTGCAGAAGCCTACGATGTGCTGAGTGACTTGAGGAAAAAAGCCACGTATGATAAATTTGGAGAAGAAGGCCTGAAGGGTGGCGTCCCCCCCGAGTTCGGAGGAGAGGAGGCCTGGACCTCCGGCTATGTGTTTCACGGGAACCCAGACAGA…
ENSXETG00000031559	cenpn	0.3328839253362068	centromere protein U [Source:NCBI gene;Acc:780000]	ATGAAACGTTCAAAAACAAAAAATGTGGCAAAGAAGACTGCTAGAAAAGACTTGAATGTCATTGCCGAAGAAGTGCACACAGATGGAAAATACAGGTGGACCTTTTTACATTTATCATGCTACATGAATAGTATTGCCTTAAAAACCCCAAAAGTGCAATTTTCACTGATTGAACTGAACCTTGTGATTGTAAATAAGACCTTACAGACCCTGGCAAGGGACCCATATAACATTCTGCTTCTAGATCCACCCTTACACAGCACAGCAGTTTATACTGATGCAGATGAGCCCCTAGAAAAAGACTTAATTGAGGAAAGGCCTATGGTGGAACAGTCATTACGTTCTTCAGCGAGGAAAGGCAAAAGTCAGAGCACTACGTCATCAAAGAGCAAAACTTCA…
ENSXETG00000006327	tnrc6b	0.3555520504986691	trinucleotide repeat containing 6B [Source:Xenbase;Acc:XB-GENE-951772]	ATGAGATTTATAGCCTTGCAAAAACATAGTACTTTTTGTTATCCTAGAGAGAAGGAGCAAGAAAGGGAAGAACAGTTAATGGAAGACAAGAAAAGGAAGAAAGAGGATAAAAAGAAGAAAGAAGCTGCTCAGAAGGTCACAGAACAAAAAACCAAAGTGCCCGAAGTGACGAAACCAAGTTCAAGCCAAGCGACGGCCGCCAGCCTACCTGGCAGCTCCCCCTCGCCACCAGTCAATGGTGGCAACAATGCCAAAAGGGTGGCAGTGCCGAACGGACAACCGCCCAGCACCGCCCGCTATATGCCTCGGGAGGTGCCGCCGCGATTCCGCTGCCAGCAGGACCACAAAGTGTTACTGAAGCGTGGACAGCCTCCTCCAGCGTCCTGTATGCTGCCGGGG…
ENSXETG00000026943	rab35	-0.37801015507707375	similar to RAB35, member RAS oncogene family [Source:Xenbase;Acc:XB-GENE-489018]	ATGGCCCGGGACTACGACCACCTCTTCAAGTTGCTCATCATCGGAGACAGCGGTGTTGGAAAGAGCAGCTTACTTCTAAGATTTGCAGATAACACATTTTCAGGCAGCTATATTACAACAATTGGAGTTGACTTCAAAATCCGGACAGTAGAGATTAATGGAGAGAAGGTGAAACTTCAGATTTGGGACACTGCAGGGCAAGAAAGATTTCGGACCATAACCTCCACGTATTACAGAGGGACCCATGGTGTCATCGTTGTTTACGATGTGACCAGCGCAGAATCATTTGTCAATGTTAAACGATGGTTACATGAAATAAACCAAAATTGTGATGATGTATGTAGAATATTAGTGGGTAATAAGAATGATGACCCTGAACGGAAAGTGGTGGAGACAGAG…
ENSXETG00000005465	cdkn2b	0.01995106183512871	cyclin-dependent kinase inhibitor 2B [Source:Xenbase;Acc:XB-GENE-478746]	ATGGCTTTCAATGCCAATACACTGTGTAGTGCTTGTGCTCGAGGAGATGTGGACCTGGCAAGACAGATGCTTCAGAGCGGCATCCCTGTAAATGCCACAAACTCCCATGGAAGGACCCCAATCCAGGTCATGATGATGGGGAGTCCTAAAATGGCTCAATTGCTGCTAGATCACGGTGCTGACCCAAAACTTCCTGACCCCTGTACTGGAGCATGCCCAGTTCATGATGCAGCCCGTGAAGGCTTTTTGGACACTCTGCTAGTGCTGCTCAATAATGGGGCAAGTCTCTACGAACCACGTGACAACTTTGGTCAGAGACCCATAGACCTGGCTCCACCACACCTGAGAGCACAATTACTGCTGCTAGGATATAACTGA
ENSXETG00000025365	tnfsf11	-0.011693190725372254	TNF superfamily member 11 [Source:Xenbase;Acc:XB-GENE-481654]	ATGAGCCCCGGTGGGTACCTGCGCGGTGCCGCGGAGATACAGTTGGCTCCGGAGAGCGCACACCGGTCCCGTACCGTCCCCAGGTCTGTGTTCGTCGCACTGTTCACCTTGGCAGTGGCGCAAGTTGGTTGCACGCTTGGGCTGTTCCTGTACTTTAAGGCACAGGGGGACTCGAGCCGAATGCCTGAACTTCATTGCTGGAAAGCAATTGCGAAGAAAAGAGAACATGAACATATAAAAGATTCTTCTACGCAAGATGAATTTATGTTATGTGAAGGGATAAAGCAAGCATTCAGCACAGCAGTTGAAAAGGAACTGCATGGATTTCTTTCTAGCAAACAGTTCCAAGTAGGAAATGCTAGAACTGAGACACGGTATGGGTCAAGGAACAACAGCTGG…
ENSXETG00000021515	mcc	-0.2872125441774713	mutated in colorectal cancers [Source:Xenbase;Acc:XB-GENE-953990]	ATGTCCGCCGAGCTGCGCACTATGGCGGCAGCTGTGGAAGTTAACGGGAGTACGAGTTGCAGCGGTAGCAGCGACACTTCCAGTACCGGAGAGGAGGAGAGAATGAGGCGCCTGTTTCAGACGTGCGATGGGGACGGCGACGGATACATAAGCAGAAACGATTTGATGATGGTGTGCCGCCAGCTTAACATGGAGGGATCTGTTGCGGAGATCATGCACCAGCTCGGAGCAGATGAAAGTGGGAAGATCTCTTTCCAAGACTTCACTCGGTGCCGCATGCAGCTCGTGCGGGAAATCCAGAAGGAGGAAGTGGATCTATCCGATGACTCCTGCAAAAATAAAAAACTTCGGGGTAGAATCACCTCATGGCCAACTGGAAGTGAAAACAGCATAGGGGCC…
ENSXETG00000035529	epsti1	-0.03799131032525152	epithelial stromal interaction 1 (breast) [Source:NCBI gene;Acc:100486740]	ATGTACGGACAAGGTGCTGAGCCTGGACGCGGAGGGGAGAATGGTCGCAGGTTGCACAACGGAAACCTATATGGAGCCCAGCGGAGTCATCCAGATGAAGGGAGATGGGGCACTGAAAGAATGGGGGATCGGCCAATCTCTGAACAAAGTTCCTTTGGGCAAGATGTTCAGCAGCAGTGCCAAGATACCTCCAGGGATCCGCAGTACATGGGAGGCTTCAGTATGATATCACCAAATCAATCCAAAAGAGAAAAAACTCAGACAATTGCTAAGCAAGAGCTGGAAAACTGGGAGCATTTTAAACAGGGTCAGAAACATGGACCAATTAACCTAACACCAAAGAAGCTAGGTGGTGGAATAACACAAGGTGAAGCTAGATGGAACCAACAAGTGACGCAG…
ENSXETG00000034136	pygm	0.7015515638304488	phosphorylase, glycogen; brain [Source:NCBI gene;Acc:100491051]	ATGTCTCGTCCCCTCACTGACCAGGAGAAGCGCAAACAGATCAGCGTGCGCGGATTGGCCGGCGCAGAAAATGTCTCCGACCTCAAGAAAAACTTTAACCGGCACCTCCATTTCACTCTAGTCAAGGACCGAAATGTGGCTCTGCCCCGCGATTATTACTTTGCCCTTGCAAATACCGTACGGGATCACCTGGTGGGACGCTGGATCCGAACTCAGCAGCATTACTATGAGCATGACCCCAAGAGGATTTATTATCTGTCTCTTGAATTCTATATGGGCCGGACACTGCAGAATACCATGGTGAATTTAGGTCTTGAAAATGCTTGTGATGAAGCAGCCTACCAGCTTGGGCTGGATATGGAAGATCTGGAGGAGATTGAAGAAGATGCTGGATTGGGA…
ENSXETG00000005462	dmrta1	-0.40846248235991683	DMRT like family A1 [Source:Xenbase;Acc:XB-GENE-984361]	ATGGACTGCAAAAGCCCAAACATTAATCCCAGACCTTTGCTACATCCAGGTTTGCTCTCCTCTACACCATCCCTACCTTCTTCTTCAGTTTTATCTATGCCTCCCAATGTACCGATGCCTGCCTCATTCCTGAGACCCCCTACACTGCTACTGAGAGCTGCTGCAGCAAATGCTACCTGTAGTCCAAGGGTTACAGTATCACTAGACAGAGGGTCAGGCAATGCGTTGTATCCACGAACACCGAAGTGTGCCCGCTGCCGCAACCATGGTGTTGTATCAGCCCTTAAGGGCCACAAACGATTTTGTCGCTGGAGGGACTGTTCGTGCGCCAAGTGCACCCTTATAGCAGAAAGGCAGCGGGTGATGGCTGCCCAAGTGGCGCTTAGAAGGCAACAGGCA…
ENSXETG00000014585	dnajc15	-0.259332776812569	DnaJ heat shock protein family (Hsp40) member C15 [Source:Xenbase;Acc:XB-GENE-5716026]	ATGGCGACGTCCAGCACCGGCATGGGGACATCTGAAGCGCTGCGCTATTCTGAGTATATGCCAGGTCCGAATGCGGGCTCATCCACTGATATTGATCGACGACTGGGTGGAACATTAATAGCGGTGGGACTTGGTGTTGCAGCTGCGGCTTTTGCAGGTCGCTTTGCATTTCAGCTGTGGAAACCTTTGGGTCAAGTTATAGCAGAAAGCGCTAAAAAAATCCCAACCCCAAGCCTTTCTTATTATTACAAAGGAGGATTTGAACAGAAAATGAATAGGCGGGAAGCTAGCCTTATTCTAGGTGTCAGTCCGTCTGCTAGCAAATCCAAAATTCGCGCAGCTCATCGAAAAATCATGATTTTAAATCATCCAGATAAAGTCCTGAGAAGTGGTACAATG…
ENSXETG00000037553	NA	0.1000341201681901	NA	ATGGAATTTTTTATTGATGCCTCTCATGGAATCCTTACAGCATCTGTTTCTTTTGACCGGGAACAAAAAACATCTTACACTCTATGGATTGAAGCTCATGACAAAGGTAACCCACCCTTGAGTTCCACAGTAAAAGTAAACATTATGGTGTTAGATATGAATGATAATGCACCACTGATTTTGCTGCCAGATTCAAATTTCTCATATGTGTTAGTGCCCCCAGATACTTTAAAGGGGTCCTCTGTAACTAAGGTTCATGCAGTTGATTATGATGCTGGCATGAATGGAGCAATACAGTATAGTGGCTTTGGGGAGCTGGGCCCCCTTGGTGATCTCTTTACAATTGATAACATTACAGGTAACATCACACTAAAAGAAAGCATCATAGGACACCACTGT…
ENSXETG00000039751	atmin	0.7216628468221629	NA	ATGGGAAAGACCAAAGAGCTGTCCAAGGATGTCAGAGACAAAATTGTAGACCTGCACGAGGCTGGAATGGGCTACAAAACCATTAGCAAGAAGCTGGGAGAGAAGGTGACAACTGTTGGTGCGATTGTTCGAAAATGGAAGGAGCACAAAATGACCATCAATCGACCTCGCTCTGGGGCTCCACGCAAGATCTCACCTCGTGGGGTGTCAATGATTCTGAGAAAGGTGAAAACGCATCCTAGAACTACACGGGAGGAGTTAGTTAATGACCTCAAATTAGCAGGGACCACAGTCACCAAGAAAACCATTGGAAACACATTACACCGCAATGGATTAAAATCCTGCAGGGCTCGCAAGGTCCCCCTGCTCAAGAAGGCACATGTGCAGGCCCGTCTGAAG…
ENSXETG00000027589	kdelr1	-0.006618224872430606	KDEL endoplasmic reticulum protein retention receptor 1 [Source:Xenbase;Acc:XB-GENE-941343]	ATGAACGTCTTTAGGCTGAGTGGGGACCTGTCCCACCTGGCAGCCATCATCATCCTGCTGCTGAAGATATGGAAGAGCCGGTCCTGTGCCGGTATATCTGGAAAGAGTCAGCTACTCTTTGCACTGGTGTTTACCACCCGGTACCTGGATCTCTTGACATCATTTATTTCATTGTACAACACATCTATGAAGGTAATCTATATCGGATGTGCATATGCAACAGTCTATCTGATATACATGAAATTCAAGGCTACATATGATGGGAACCATGACACTTTCCGAGTGGAGTTTCTTGTAGTCCCTGTTGGTGGATTATCAGTCCTGGTCAATCACGACTTTTCTCCTCTTGAGATCCTGTGGACATTTTCCATCTACCTGGAGTCTGTTGCAATCCTGCCT…
ENSXETG00000025777	sec22b	0.18021303241217476	SEC22 homolog B, vesicle trafficking protein (gene/pseudogene) [Source:Xenbase;Acc:XB-GENE-999421]	ATGGTCCTGCTAACGATGATCGCCCGAGTGGCTGACGGGCTCCCGCTGGCTGCCTCCATGCAGGAGGACGAACAGTCAGGCAGGGACCTGCAGCAGTACCAGAACCAGGCCAAGCAGTTGTTCCGCAAGCTGAATGAACAGTCTCCAACGCGGTGCACCCTGGAGGCAGGAGCCATGACCTTCCACTATCTGATTGAGAAAGGTGTTTGTTATCTGGTTCTCTGTGAAGCTGCTTTCCCCAAGAAGCTGGCCTTTGCTTATCTGGAAGATCTGTTTTCTGAATTTGACGAACAACATGGGAAGAAAGTGCCCACCGTGTCACGGCCATACTCCTTTATAGAGTTCGATAACTACATCCAGAAGACAAAGAAGTCATACATCGACAGCCGAGCCAGAAGA…
ENSXETG00000037323	gcsh	-0.21263102916755255	family with sequence similarity 181 member B [Source:NCBI gene;Acc:100498232]	ATGGCGGTGCAAGCTCCAATCATGAACCACCAGTTTATGTCCTTGTACATCCCCGGATCCATTGCAGATTATGAGAAAAATTACCAAGAAGGAGTGGACTACCTTGGTTCCGTTGAAAGTGGCGACTTCAAAGAGGCAACCAAGGACCTGCTCAGCTTCATCAACACGGCCTCCAGCAACATAAAGCTGGCTTTGGACAAACCGGTAAAGTCCAAGAGGAAAGTCAACCATCGGAAGTACCTGCAGAAGCAGATTAAGAGGTGCACAGGTTTGATGGGCAACGGGAATACAAATCAGGGATCTCCTAAAAGGTCACCTACATCTCCCAGCAATAGCAGTATGAGCCCGTCGGGCTTTCCCTGCAAGCCCCCTACAAAGAGAGACAGCTCGCAGTCCAAT…
ENSXETG00000038739	NA	0.5715270514802324	NA	ATGACCATCAATCGACCTCGCTCTGGGGCTCCACGCAAGATCTCACCTCGTGGGGTGTCAATGATTCTGAGAAAGGTGAAAAAGCATCCTAGAACTACACGGGAGGAGTTAGTTAATGACCTCAAATTAGCAGGGACCACAGTCACCAAGAAAACCATTGGAAACACATTACACCGCAATGGATTAAAATCCTGCAGGGCTCGCAAGGTCCCCCTGCTCAAGAAGGCACATGTGCAGGCCCATCTGAAGTTTGCCAATGAACACCTGAATGATTCTGTGAGTGACTGGGAGAAGGTGCTGTGGTCTGATGAGACCAAAATACAGCTCTTTGGCATTAACTCAACTCGCTGTGTTTGGAGGAAGAAAAATGCTGCCTATGACCCCCAAAACACCGTCCCC…
ENSXETG00000030678	NA	0.8127321824334288	caspase 3, gene 1 [Source:NCBI gene;Acc:100486222]	ATGGCTGAGGCAGATGCACCCGATGCCTCTGGGTTCACTAGAAAAATGCCAGATAAGATGAATGTTACACCTGCAAAACCAGACAACTCAATGGTGTATAAAATGAATTATAAACAAAAAAGTATTTGCTTGATTCTGTGCATGGAGAAGTTTGATAATGATCCCAAAGGAAAGCGCTCCCGAAACAGCAACGATGATAAGATCTTCCTTAATAATATCTTTGTAAAGATGGGATTTGAGGTGCGACTTGAGGAAAATAAAACTGCTGATGAGATTGAGAGTCTGTTGAAAGACATTGCAAGACAGGATCACAGTGAAAGAGGTTGCTTCGTGTGCGTTGTCATAAGTCACGGCGATAAAGACTTTTTTTATGCTCGTGACCAAGAATTTAAAATAGAT…
ENSXETG00000035056	tusc3	0.14475646954193597	NA	ATGAGGGTCGAGGAACCCAAGAAAAGTGAAAGTGGGGGGTTTATAAAGGAGTCACATTACCGGATCCCCTCAGGTCCTGGGAACCAACTAGCAAAGATCACGTGTGAGGCCTATCATGAGACTTTGCACCATCCGGTCACTGAGACACTACAGATTGCAAAAAGTTACAGGCACTATTATTGCACTGGGGCCGCCATATTGTTCATTCTCTTGGTCATCCTGTGCTTAGTCAAAAGTCTCCAGAACTTCCCAGTGAGTTCCATACACACCTTGATGTCGGACGATGGAGAGAAGGTGACTCTGTACTGTGTGGCCTCCGACTGCCCAGAGGAACCCCGGGTGACATGGACAGTGACAGAAGGCAGTGAAACAAAGAAGAAGGTGATAAGGACCGGGACA…
ENSXETG00000010062	chchd2	-0.11822222743119143	coiled-coil-helix-coiled-coil-helix domain containing 2 [Source:Xenbase;Acc:XB-GENE-5851215]	ATGCCGAGAGGAAGCCGCAGCCGCACATCTAGGGTAGCCCCCCCAGCCAGTAGAGCACCAGCAATGAGACCAGCACCCCCTCCTGCTGCTCACCCACCTGCCCCTGTTGCTCAGGCTCCTTCTGCCCTTGGTCCAGCAGCAGCAGCACCCAGACAGCCAGGTCTCATGGCCCAAATGGCTACAACTGCTGCAGGGGTGGCTGTGGGCTCTGCAGTGGGACACACAATAGGCCATGCAATTACTGGTGGTTTTGGTGGAGGAAGCAGTGCTGAGCCAGCAAGGGCAGATATTACATACCAGGAACCAGCACAGCCTATGTATCAGCAACAGCAGCAATCTCAGTATACACCTTGTCAGTATGAGATGAAGCAATTTCTCGAATGTGCGCAGAATCAAAGT…
ENSXETG00000039207	cplx1	-0.46732150878308476	purinergic receptor P2Y, G-protein coupled, 2 [Source:NCBI gene;Acc:394636]	ATGAACGCGTTTGGAGGCAGAGAGAACTCCACGTACAAGTGTACATTCAACGAGGATTTTAAGAAAGTCCTCCTCCCCGTGTCGTACGGCATTGTGTTCTGCGTGGGGCTGATCCTGAACATTCTGGCCCTGTACATCTTCCTGTTCCGGATCAAGCCCTGGAACGCCTCCACCACCTACATGTTCAACCTGGCCATTTCCGACATGATGTACGTCATCTCCCTCCCGCTGCTGGTCTATTACTACTCGCAGGGGGACAACTGGCCGTTCGGCGTGGCCTTGTGCAAGATCGTCAAGTTCCTTTTCTACACCAACATGTACTGTAGCATCTCCTTCTTGCTGTGCATCAGCATCCACCGCTTCCTCGGGATCTGCTACCCAATGAAGTCGCTGGGTTGG…
ENSXETG00000038538	imp3	0.49525479472586564	IMP3, U3 small nucleolar ribonucleoprotein [Source:NCBI gene;Acc:448133]	ATGGTTCGCAAGTTAAAGTATCACGAGCAGAAGCTGCTGAAAAAGGTAGACTTTATTAACTGGGAGGTGGATAATAACATCCATGAAGTCAAAGTGCTGCGAAAATACCATTTGGATAAGCGAGAAGACTATACTAAGTACAACAAACTCAGTAGAAATATCCGAGAACTTGCCCAAAAAATTAGAGACCTGGATGAAAAAGATAAATTTCGTGTCCAAAGTACTGCAAAGCTCCTAGAGAAACTATATTGCATGGGGCTGATACCCACTAAACAGAATCTTCAGCTTTGCCAAAATGTCTCTGCGTCTTCATTTTGCAGGAGAAGACTTCCCACCATCGTGGTCAAACTGAGAATGGCACAAAACCTGAAGACAGCCATCACGTTTATAGAGCAAGGT…
ENSXETG00000039339	fam43a	-0.12891558587063917	family with sequence similarity 43 member A [Source:NCBI gene;Acc:100135352]	ATGCTGCCCTGGAAGAAAAGCAAATTCGACCTGATCGAGGAGGATCCGAAGCAGGCGAAGCAGAAGGGCTATGCAGTGAGTCTCAACTACAGCGCCCTCACCTCCTTCGCCAAGTCGTGTCCGGAGGGGGCCCTGACTCGGGTGGGCAGCATGTTCAAGTCCAAGAGGAAGAAGATCAAGATTACGGGGGAAGACCCTACATACACAGTGCTGTACCTAGGCAACGCTACCACCCTGCAGTCCAAGGGAGAGGGCTGTACGGACCTAGCAGTGAGCAAGATCTGGAGCAAAAGCGAGATGGGCAAGCATGGCACCAAGATGAAGCTGACCATCAGCTCGCAGGGTATCCGCATGGTGCATGTGGAAGACAAAGCCAAGCGACCCGGGCACCTGTATTTG…
ENSXETG00000007610	bcorl1	0.135307592611663	BCL6 corepressor like 1 [Source:Xenbase;Acc:XB-GENE-983529]	ATGCTATCGGCCGCCCCGCTTTACAGCGGTGTGCACAACTGGACCAGTGTGGACCGTGTGCGCATGTGCGGCATTAACGAGGACAGGAGAACATCACTATCTGATGAGGAGTCTAAAACCAGCTGTTCCCAGCACCGGGGGTCTGAAGATCATTGTGTAAACAGCTTCTTATCCAAGGTGGAGTTCACGTCAGGAGCCAAACAAAGTGATGCTCTGATGCTTCAGGAAGATGGGGGTGCAGTGGAAACTGGGCAGAGACTAGAGGAGAAGCCCCCAGATTCTATATTAACTTCAGGAGACACAGTGGTACCCAAGGTCCATGATAATACGTTGCCATCAGACAGCAAGCAAGTTACCAACATGTTGGATATCTCCATCCAAGCAACTTCAACTCCAGAC…
ENSXETG00000038617	trerf1	0.2552643054008722	ELAV like neuron-specific RNA binding protein 2 [Source:NCBI gene;Acc:594913]	ATGGCAGTCAGACTGTGTGATGTGGCTTCTCTGCTTAGAAGTGGCTCGTGGGCAGCAGAGCCTTGGACTGGGCAGGTAATTGCTGCCATGGAAACACAGCTGTCCAATGGACCCACTTGTAATAACACAGCAAATTGTCCAAACACCATAAACAACTGTTCATCACCAGTTGAATCTAGCAACACAGAAGACAGCAAGACCAATCTTATAGTGAACTACCTTCCGCAGAACATGACACAGGAAGAATTGAAAAGTTTGTTTGGGAGCATTGGTGAGATAGAGTCCTGTAAACTAGTAAGGGACAAAATTACAGTAGGACAAAGCTTGGGTTATGGCTTTGTGAACTACATTGACCCTAAGGATGCTGAGAAGGCTATCAATACGCTGAATGGACTGAGA…
ENSXETG00000037399	cxcr3	0.1628081050851086	peroxisome proliferator-activated receptor gamma, coactivator-related 1 [Source:NCBI gene;Acc:100488852]	ATGGCGGCGCGGTGGGGAGCAGGAGAGGAGACTTTAACCATCGGAGGAATGGAGCTCTTCACCGCCGGAGGCCCTCTCCAGTGCAATACCCTGGAGGATCATGAGCCTTGTTCCGGCCTTTCAGACCTCAGCCTGGATGCAGGAGGATTCCTGGGAACTTTCCAGGGCTACGTGGATCATTCTATCATATCTATCATTGATGATACTGGTGCATTGGCTGAAAACAAAGGTCACTTTGATGAAGAAAACGAGCTGTCACTTCTGAATGCTCTAACAGAGATTCTGGACAATGCCGATGATGAGAATATGTCTCCATTTGACACCATCCCAGATACAGAACTACTCGTTTCCCCAAAAGACAAAGAAAACTCTACATTTCAGAGATTTTTAAGTCTATCC…
ENSXETG00000001535	primpol	0.2821620101193473	primase and DNA directed polymerase [Source:Xenbase;Acc:XB-GENE-5933880]	ATGGAACGGAAATGGGAAGAAAAAATGAAGCATGTGGAGGAACTGGCAGATTATTATAGAAGACATCCGCTTAGTTTTCCTTACAGGCCAAAGCTTGCCAAGCCATGGCTGCCATCTTCTGTCTGGAAACTTTTCCCTCGACAGGCTCTAGCATTTAACTTTGCCAAAATGTGTAAGGAGACCTTTCACTCTTTTGCCATTGCCACAACAAGAGATGATACAGAGCGAAGATTATATCTTGTAACAACATATGCAGAATTTTGGTTTTATTACGTCAAACAACCAATTTCCCTGAGTCACTGCTATGAAGTCATTCCTGCTGACACTGTGTGTAAGCTTTACTTTGACATTGAATTTTACAAACCTGCAAATCCAGAAGTAGATGGTAAAAAAATGGTT…
ENSXETG00000003454	xxylt1	0.15340819069875464	xyloside xylosyltransferase 1 [Source:Xenbase;Acc:XB-GENE-5831761]	ATGGCCTGTAGGATTACTGGCATGAGAGCCCTTCACGGGATATTATTGCTGGCCGCTGCCCTGGCGGTTTTTGCCTTTTATTACCTGGGGTCAGGAAAGGAGAATTTCTCTAGTACCACCAGGCGGATTAAAGAGAACCGGGCAGCCCAGAGCACCAGCACTGAACTAGACCTCATTGACGCCGCCTCCTCAGAACTGAAGCTGAGTGAGAAGGGAAAGATCCTAGAGAGCCGGGGGCCACTGGACTATCACTTACTCATGATGTTTACTAAGGTGCACAGGAACCCAGGGCTCCGGGACAAGTTCCAGGTCGCACTCAGTTCGCTCATCAAATATGGCAAGTTTGAAAGTAACGAGGTGCTCTGCCTTCACTTTGTGTCCGACGAGCCCAGCAAAGAG…
ENSXETG00000010064	phkg1	0.19586899083967854	phosphorylase kinase, gamma 1 (muscle) [Source:Xenbase;Acc:XB-GENE-987485]	ATGACAAAAGATGAAGAATTACCAGACTGGCAGACGTCACAGGAATTCTATGAGAAGTATGAGCCAAAAGAGATCTTGGGAAGAGGAGTGAGTAGTGTTGTGCGGCGCTGCATTTTCAAGCCCTCCAGAGAAGACTTTGCAGTGAAAATCATAGACATCACTGGAGATCACTTATCCTCAGAGCAGATTGCAGAACTGCGGGACTCAACAGTCAAGGAGATCGACATCCTAAAAAAAGTATCAGGGTTCCCTAATGTCATCCAGCTAAAGGACAGCTATGAATCCCACACTTTCTTCTTTCTTGTGTTTGACTTGATGAGGAGAGGAGAACTGTTTGATTACCTTACAGAGAAGGTCACACTGAGTGAGAAGGAAACAAGGAAGATCATGAGGTCACTG…
ENSXETG00000000472	slc30a5	0.31010383689994747	solute carrier family 30 (zinc transporter), member 5 [Source:Xenbase;Acc:XB-GENE-962722]	ATGGAGGAGAAGTACAGCAGTAATGTAATGAGCAGTGGCCGGCTGGGGCCAGTAGATGCCCCAGAGTCCAGGTTAACCCGATACATTGTGCTCCTGTGCTTCACAAAGTTTTTGAAGGCTCTTGGAATATTTGAATCTTATGATCTATTAAAAGTCGTCCACATTGTACAGTTTATCTTTATATTAAAACTAGGTTCTACATGTTTTATGGTTTTGTTTCAAAAGCCATTTTCATCTGGAAAGTCAATTACAAAACGGCAGTGGGTCAGTATTGTAAAACATGCTTTTGTAAGCTGCATTATCTCACTCCTGTGGTTCTTTGGCCTGACGCTCTGTGGCCCATTAAGGACCTTGCTGCTTTTTGAACATAGCGATATTGTAGTCATTTCATTGCTCACT…
ENSXETG00000003457	NA	0.4036723448444528	D-beta-hydroxybutyrate dehydrogenase, mitochondrial [Source:NCBI gene;Acc:100497276]	ATGGGGTTCCGTGTTACCTGTGCCAGGGCGGTGCTGCTGGTGCTCCTATCCCTCGGCCTCACCCTAGCTCTTGGCTTCGCACTCCCGGAGGCGCTAAAGCTCATCTTCAGGATTTTGGGGTTCCCCAGTGACAGTGTGACACATGGCATTGTGCTGCTGTACGTGGTGTTTGTGCTGTGGCTTGCCATGCCAGCTATACCCAGGGGCAGTCTGCCAGTCGAGGGAAAGGAGGTGCTGATCACAGGCTGTGATACTGGATTTGGATTTGCTTTGGCAAAGCACTTGCATAAATTAGGATTTACAGTATTTGCTGGGTGTTTGTTAAAAGATAAAAATGGAAATGGAGCCGAAGAGCTACAAGGAATGCAGTCTGATCGCATGCATGTTTTCCAACTGAAT…
ENSXETG00000036380	prkab2	0.3258039071129921	protein kinase, AMP-activated, beta 2 non-catalytic subunit [Source:NCBI gene;Acc:100127782]	ATGGGTAACACAGCAAGTGATCGCTTATCTGGAGATCGGCATGGCAAGTCCCACCGTGCAGATGGAGCAACTGGGGGACACTCTACTAAGGAGCATGAGGAAAACAAAATCATGGTTGGAAGCACAGACGACCCAAATATCTTTAGTACTCAAGAATCTAAGCACCCTGGTGACTCAACGTGGCCCCAGGAATCAGAGGATCCTGGAAAATCAGCTCAGCAAGGTCGTCCCACTGTAATCCGTTGGACAGAAGGTGGCAAAGAAGTCTTCATATCTGGGTCATTTAACAACTGGACTGCCAAAATTCCACTGATTAAAAGCCACAATGACTTTGTTGCCATTTTGGACCTTCCAGAGGGAGAGCATCAGTACAAGTTTTTTGTGGATGGCCAATGGGTA…
ENSXETG00000014586	enox1	0.20134037464763418	ecto-NOX disulfide-thiol exchanger 1 [Source:Xenbase;Acc:XB-GENE-955953]	ATGGCCACATGGGCTGATTTTCAGCCCCATGCTCTGAATAGCCTTTCCATGTGCCTGTGTCCAGATATTGTATTGCTTATTTTATTTAATTGTTCAGCAGCGGATGCTCTTGGGAGTATAGCTATCGATGCTACACACCGCACTATGTCAGTCACAGACCCCACAGCTTGGGCCACAGCAATGAACAACCTTGGGATGGTGCCTGTAGGACTTGCTGGACAACAGCTTGTATCAGATTCAATCTGTGTGCCGGGCTTTGATCCAAGCCTAAGCATGATGACTGGTATAACTCAGATCAATCCAATGATGGCAGGAATGGGCCTTTTACCGCCACCACCAACCCAGTTGCCTATTGTCAAAGAGATTATCCACTGCAAAAGCTGCACCCTCTTCCCTCCC…
ENSXETG00000001537	casp3.2	0.1443778729261674	caspase 3, gene 2 [Source:Xenbase;Acc:XB-GENE-479960]	ATGGAAGAATCCCACAATGGTGTACAATATGGAGAAGATACAGCAGATGCAAAAACATATTTTACAAATCAGCAGATAAGCCTGCAAAACTGTGATATAAAAGACATGGAAAAAAAAACAAAGTTTGCTCATCTCCACAAGTACAGAACTGATTACCCTGAGATGGGAATTTGCCTCATCATTAACAATAAGAATTTTCAGTCATCTACAAACATGGGAGTACGAAATGGTACTGATGTGGATGCTCGCAAGTTACATGAAACTTTCACAGGTTTGGGATACAAAGTAAAGGTTTGCAATGATCAAAAGTCTAACGACATCTTTACACTTTTGAAAAAAATGTCCGAGGAAGATCATAGCAAGAGAAGCTCCTTTGTATGTGCTATATTGAGCCATGGA…
ENSXETG00000040487	NA	-0.034323665877072834	NA	ATGAGAGAATCCCTATTGGTGCTACAGGGGAGGATCTACAGCCCACCGCACAGGGCTCTATGGGCCGCACAGGGCTCTATGGGCCGCACAGGGTTTATGGGCCGCACGGGGCTCTATGGGCCGCACTGGGCTCTATGGGCCGCTCAGGGCTCTATGGGCCGCTCGGGGCTCTATGGGCCGCTCAGGGCTCTATGGGCCGCTCGGGGCTCTATGGGCCGAACAGGGCTCTATGGGACGCTCAGAGCTCTATGGGCTGAACAGGGCTCTATGGGCCGCACAGGGCTCTATGGGCCGCACTGGGCTCTATGGCCCGCACTGGGTTTATGGGCCGCACAGGGCTCTATGGGCCGCACTGGGCTCTATGGGCCGCACAGGGTTTATGGGCCGCACGGGGCTCTA…
ENSXETG00000020568	nxnl1	-0.18706031810979312	nucleoredoxin like 1 [Source:Xenbase;Acc:XB-GENE-961004]	ATGGCTGATTTATTTTTGGGCAAAGTTTTGGTGAAAAATAACCGTGACCAAGACGAGCTGGACACAGAGCGAGAGATTTGGGAGCGCCTGCAAAACCGCGTGATCCTTCTGTTCTTCGCAAGATCAAGGGACTCACAATGCCAAGAATTCGCGCCCCTTCTGAAGGATTTCTTTGTGCGGCTGACTGACGAGTTCTACGTAAACCGAGCGTCCCAGCTTGCCTTAGTCTATGTGTCGCTGGACCAGAGCGAGGAGGAGCAGGAGAAATTTCTTAAGGATATGCCAAAACGCTGCTTGTTTGTTCCCTTTAAAGATGAAGAATTCAGGAGAAATCTTGAAGCTCAGTTTGCAGTGTCTCATGTTCCGGTCCTTGTTGTCCTTAAGCCTTCTGGTCATGTG…
ENSXETG00000009506	cs	0.41464813255381605	citrate synthase [Source:Xenbase;Acc:XB-GENE-943160]	ATGTCTCTCATTACAGCTGGACGCCTGTGCGCCCGTATCCTCGGAGCCAAGAACTCCCCTTGTGCTCTGATTGCTGCCCGGCAGGCTAGCTCTTCTGCGAATCTAAAAGATGTCCTGTCAGATTTAATCCCCAAAGAACAAACTAGAATTAAGAATTTTCGGCAGCAGTATGGCAAGAACGTGATAGGACAGATCACTGTTGACATGATGTACGGTGGTATGCGAGGGATGAAGGGTTTGGTTTATGAAACATCTGTGCTTGACCCTGATGAGGGTATCCGTTTCCGAGGCTACAGCATTCCAGAGTGTCAGAAGTTGCTCCCCAAGGCTCCAGGTGGAGAAGAGCCATTACCTGAGGGACTCTTCTGGCTTTTGGTGACCGGGGAGGCACCTAGTCAA…
ENSXETG00000038450	mfsd9	-0.02706586988372442	major facilitator superfamily domain containing 9 [Source:NCBI gene;Acc:100494544]	ATGTCAGCATCAATAGGAGTCGAGAAAATGAAGGCAAACGGGCGATTCTTCCATCACTGCCTACACGTTGTAGGCTTCCTGGACCTTTTTGGAGTAAGCATGATCATTCCATTGTTGAATCATCACATTAAATCCCTTGGAGCAAGCCCAACTACAGCTGGCATAATAGGTTCTTGCTATGGTGTGTTGCAACTATTCTCTAGCTCAATTGTGGGTAGTTGGAGTGACATTGTTGGAAGACGATTTTCACTTATTACCTGTATTCTTGTCAGTGCTTTTGGCTATGCCCTTCTTGGTTTATCCACCACCATATTTATATGTGCTATTGCTAGAATCCCAGTAGGAATCTTTAAACACTCACTTTCCATATCAAAAGCCTTACTCTCCGACTTGGTGGCA…
ENSXETG00000024066	pms2	0.09674838613518241	PMS1 homolog 2, mismatch repair system component [Source:Xenbase;Acc:XB-GENE-998793]	ATGACTGACAGCCCCAGCTCTGAGCTTGCAAAAGCAATAAAGCCTATTGACCGGAAGTCAGTCCATCAGATTTGTTCCGGACAGGTGGTGCTGAGTCTTGCCACTGCTGTGAAAGAACTCCTGGAGAACAGCATTGATGCTGGTGCCACAAGCATTGATATAAAACTTAAGGAGTATGGAGCAGAGTCTATTGAGGTGTCAGATAATGGCTGCGGTGTTGAAGAAAACAACTTTGAAGGTTTAACTCTTAAGCATCACACATCCAAGCTACAGGATTTCTCGGATCTTATTAGTGTGGAAACATTTGGATTCCGTGGAGAGGCTCTCAGCTCTCTGTGTGCATTAAGTGATCTTTCAATTGTCACCTGCCACAAGACTGCTAAAGTCGGAACTCGTTTG…
ENSXETG00000040748	NA	-0.06567971923267404	NA	ATGAAGTCCAAAGAACATACCAGACAGGTCAGGGATAAAGTTATTGAGAAATTTAAAGCAGGCTTAGGCTACAAAAAGATTTCCAAAGCCTTGAACATCCCACGGAGCACTGTTCAAAGGATCATTCAGAAATGGGAGTATGGCACAACTGTAAACCTACCAAGACAAGGCCGTCCACCTAAACTCACAGGCCGAACAAGGAGAGCGCTGATCAGAAATGCAGCCAAGAGGCCCATGGTGACTCTGGACGAGCTGCAGAGATCTACAGCTCAGGTGGGGGAATCTGTCCATAGGACAACTATTAGTCGTGCACTGCACAAAGTTGGCCTTTATGGAAGAGTGGCAAGAAGAAAGCCATTGTTAACAGAAAACCATAAGAAGTCCCGTTTGCAGTTTGCC…
ENSXETG00000007609	thrsp	-0.1302811531215417	thyroid hormone responsive [Source:Xenbase;Acc:XB-GENE-6258595]	ATGCAGAGAATGGAGGTGTCAGTGCTCAACCCTCAGCGCCAGTCTTTGCTGGATGCAATCCAACGCTTTAACACTGCCACGACAATCATGGATGAAACCATCATGGTGCCTAGTATGTTGCGGGATATCCCTCCTGTTCAGGAAGAATGTGGAGAACAGTCTAACCAAATCATGGAGCAGAAAAGCCTCTATGAATCCTATCTTCTCCTAAAATCTCTCAGGAATGACATGAAATGGGGGACTCACCAGGACAGTAAAACTACACAAGAACACTACACCGAGAAAGAGGAATCTCCTGAGGATGAAACAAGCGATCTTGTAGAGCAATTCCAGCAACACTTAAAGGGACTTCTGTCTGTACTTACCAAACTGACAAAAAAGGCCAATCTACTGACAAAC…
ENSXETG00000039661	slc44a2	0.7237860277091823	NA	ATGGGAAAGACCAAAGAGCTGTCCAAGGATGTCAGAGACAAAATTGTAGACCTGCACAAGGCTGGAATGGGCTACAAAACCATTAGCAAGAAGCTGGGAGAGAAGGTGACAACTGTTGGTGCAATTGTTCGAAAATGGAAGGAGCACAAAATGACCATCAATCGACCTCGCTCTGGGGCTCCACGCAAGATCTCACCTCGTGGGGTGTCAATGATTCTGAGAAAGGTGAAAAAGCATCCTAGAACTACACGGGAGGAGTTAGTTAATGACCTCAAATTAGCAGGGACCACAGTCACCAAGAAAACCATTGGAAACACATTACACCGCAATGGATTAAAATCCTGCAGGGCTCGCAAGGTCCCCCTGCTCAAGAAGGCACATGTGCAGGCCCGTCTGAAG…
ENSXETG00000037821	syt14	0.35482167576210455	NA	ATGAGAACAAAAGTAATTGAGATCTATCAGTCTGGTAAAGGTTATAAAGCCATTTCTAAAGCTCTGGGACTCCAGCGAACCACAGTGAGAGCCATTATCCACAAATGGCAAAAACATGGAACAGTGGTGAACCTTCCCAGGAGTGGCCGGCCGACCAGAATTACCCCAAGAGCGCAGAGACAACTCATCCGAGAGGCCACAAAAGACCCCAGGACAACATCTAAAGAACTGCAGGCCTCACTTGCCTCAATTAAGGTCAGTGTTCACGACTCCACCATAAGAAAGAGACTGGGCAAAAACGGCCTGCATGGCAGATTTCCAAGGCGCAAACCACTTTTAAGCAAAAAGAACATTATGGCTCGTCTCAATTTTGCTAAAAAACATCTCAATGATTGCCAA…
ENSXETG00000037273	NA	0.09780335822087446	NA	ATGCCATTATATCCCATTATATCCCATTTTATCCCATTATATGCCATTATATCCTATTTTATGCCATTATATCCCATTATATCCCATTATATCCCATTTTATCCCATATTATCTCCTGCAGAGTTTGGGCACGGTACTGACCCAATATGGCTCCCTGCAGGTTCTGCACTGAAGGTATCGGATCCTCCCTCTCACAAAGCCCTTCTGGGTTCTACAACTTCCCTCCCTTGCACCTTCTCTTTGGGCAAATCTCCCATTGACCACTCGGTGTTGTCCATCATCTGGACCTTCAGAGACAAGGAGATTCTTAGGTACAACAAGGGTCGGACCCTCTCCCAAGCCGGACTGTCTCTGGATGTTCAGGCCATAGAGGAAGGGAGGGTGTCTCTGTCGGTCTCC…
ENSXETG00000030826	tmem182	0.19666616190543804	transmembrane protein 182 [Source:NCBI gene;Acc:779857]	ATGAAGATGAAGCTAAGTATTGGCATATTTTTTGGTGGTCTCTTTGGTGCATTGGGGATTTTAATCTATCTCGTAGCCTTTGGAAGTGACTATTGGCTTCTTGCCAAGGAAATTGAGAAATGCTCAGAAAACCAAGAAACTGGGGATAATGCAACCCACTCGGTTCTCTTGCACCATGAAGGATTTTTCTGGAGATGTTGGTTTAATCATGCTGAAGAAGAAAACTCAAACACCATGGAGAATTTCTGGTTCACTAACCAAGCACCAACTAAGAACTGCACCCATGCATACCTCTCCCCATTTCCACAGAATAGAGACAACAGTAACTCCACCTCGTATCATTCTGCACTTGTATACCGTGGCTTCTGGAACATATTCATGCTTCTTGGTGTAGTAACA…
ENSXETG00000007608	tspan6	-0.09113270404992024	tetraspanin 6 [Source:Xenbase;Acc:XB-GENE-868432]	ATGGCGTCTCCTTCGCGAAGGTTGCAGACCAAGCCTGTAATAACGTGCCTAAAGAGCGTGTTGCTTATCTACACCTTTATCTTTTGGATCACAGGTGTCATCCTTCTAACAGTTGGTGTCTGGGGAAAAGTCAGCCTTGATATATATTTCTCTCTCCTGAATGAGAATGCCACCAATGTTCCATATGTTCTTATCGGCACTGGAGCGGTCATCATCCTCCTGGGCACATTTGGCTGTTTTGCCACATGTCGAGCAAGTACTTGGATGTTGAAATTGTATGCAATGTTCCTGTCCATCATTTTCCTGGTCGAACTGATAGCAGCCATTGTTGGTTTAGTTTTCAGGCATGAGATTAAGAACAGTTTTGAACAGGGTTACTTGCAAGCTCTCAAGCAGTAC…
ENSXETG00000039051	NA	-0.46189481346311256	NA	ATGGGCAAACCTAACAAAAGCAGGTCGGAAAGGGAGAAAACCCCAAACAAAAAGCAGTCAGCAGCCCAGAGCGATATTGCTCCGTTATTTCTAAAGAGAAAAACGGACCGCCTGGAATCCAAGATGGCGCCCGTCCGAGAAATGAGAGAGGAGGAAGCAGACTCCAACAGAGAACTCTCAGAACAAGAAAGCGACACGGAAGAGGGAATCGATTTACAAGCATATATATCTAATCTACCCTCTAAAGCTGATATTAAAGATATGCTTCGTGAAATGACTGACACCATCAAGGAGGAAATCCAGGATATAAAGAAAGACATGTTAACATTAGCTGCACGCACAGATGACCTAGAGAACGGCATAAGTAAGTGCACAAGCAACCAAAAAACTATATATATG…
ENSXETG00000038389	pgls	-0.05758162777322942	6-phosphogluconolactonase [Source:NCBI gene;Acc:548361]	ATGTCCTCCTCCCATCAGATCTGTGTGTTCTCCTCACCTGCAGAGCTTGCGCTCTCCCTTACTCAGCTCCTGGTTCATGAGTCCCAGGGCACCTGTAGCTTCCGGCTGGCTTTATCTGGTGGGAGCCTGGTGCAGCTGCTAAGCCGGGAGCTACCGAAGACCGCAGGGCTCAATACAGCCGGGTGGAAAGTTGCCTTCTGCGATGAAAGGCTTGTACCATTCTCAGATCCCGAGAGTACATATGGCGAGTATAAACGCCAGCTGGTTCCCCTTGGGCTTCTTTCCGAGTCGCAGTTTGTGACTATTGACCCAGCGCTGCCTGTAGAAGAAGCCGCAGTGGATTATACCAAGAAAGTGCGGGAGCTGTTCCCTGGGGATGACCATCCAGTGTTTGACCTT…
ENSXETG00000001536	irf2	0.21956996275004367	interferon regulatory factor 2 [Source:Xenbase;Acc:XB-GENE-942910]	ATGCCAGTAGAAAGGATGCGAATGCGACCTTGGCTAGAAGAACAAATAAATAAAGATCTAATTCCTGGTTTAAAATGGTTAAATAAGGAGAAAAAGATATTTCAGATTCCATGGATGCATGCTGCTCGTCATGGCTGGGATGTTGATAAGGATGCTCCTTTATTCAGAAACTGGGCTATACACACAGGGAAGTATCAACCTGGAATAGACAAGCCAGACCCAAAGACATGGAAAGCAAACTTTCGCTGTGCTATGAACTCTTTACCAGACATTGAAGAAGTTAAGGATAAAAGTATGAAAAAAGGAAATAATGCTTTCAGGGTGTACAGGATGATCCCAGTAGCAGAAAGGCCATCAAAAAGAGGTAAAAAAAACAAAGCAGATAAAGAAGACAAAATC…
ENSXETG00000034561	NA	0.7244906084884302	NA	ATGGGAAAGACCAAAGAGCTGTCCAAGGATGTCAGAGACAAAATTGTAGACCTGCACAAGGCTGGAATGGGCTACAAAACCATTAGCAAGAAGCTGGGAGAGAAGGTTACAACTGTTGGTGCGATTGTTCGAAAATGGAAGGAGCACAAAATGACCATCAATCGACCTCGCTCTGGGGCTCCACGCAAGATCTCACCTCGTGGGGTGTCAATGATTCTGAGAAAGGTGAAAAAGCATCCTAGAACTACACGGGAGGAGTTAGTTAATGACCTCAAATTAGCAGGGACCACAGTCACCAAGAAAACCATTGGAAACACATTACACCGCAATGGATTAAAATCCTGCAGGGCTCGCAAGGTCCCCCTGCTCAAGAAGGCACAGGTGCAGGCCCGTCTGAAG…
ENSXETG00000035837	lcor	0.12775522694172867	ligand dependent nuclear receptor corepressor [Source:NCBI gene;Acc:100125102]	ATGGCGGCGAGTCTGTGTAAGAGCCAGCAATGTTCCATCGAGAGGCGCGGTTTTCGTCAGGAACTTGACTCGTGGCGGCACAAGCTCATTCACTGTGTAGGCTTTGAGAGCATTTTAGAAGGGCTCTTTGGACCTGGATTACTGAAAGATATCAGCCTATATAAAGACTGTGAGCCAACGGGTGTATGTGATTGGTCCTTTGATGAAAACTGCCTTTTCTGCTGCTTGAGAAGAGAAAAAGTCAAGGAACACTTGGCTGATTTGCATAAGCCAGTGACTGATGTGGGGCCAGAAAATTTACTTAAACAAGAAAAGTTAAGAATTATTCGGCTAGAAAAACAAGCTGAAGAATTCATCAATGCGGTATTTTATAAGAAAGATACTCCTAGGGTCTCGGAC…
ENSXETG00000004912	rbfox1	0.09384991005960006	uncharacterized LOC100144954 [Source:NCBI gene;Acc:100144954]	ATGATGTGTGTGCTGCCGCTGGCCGGCAGCCTATCAGAGAGGCCGCCGGACCGCGATGACGTCATCGCCGCCAGCGCTGAAGAGGAGGACCGGGCTGAAGCCAGACTGCAGGAGGACCGGGCTGAAGGGAGGCGCGTGATTCGCTCTCAGGAGAGTGAAGATATTGATGAGTGGGATGATGCTGCCCTCATTAAATCCTATGAAAAGGCAGTACAATCCTTCCAGGATATGCTAAGATGCAGCGACAAGAATAGGAGACAAGAGGGTGCCTCTGCTGCAGGGGACTCCCAGAAGGATGGCAAGCGGGAAACAAATCGGGAAACAGAATGGGACAGAGAGGGCCACAAGGACATGCAAAAAGAGGAGGCTGAGAAGTGGAACAAGAAGAAGAAGGCACAA…
ENSXETG00000007921	kcnv1	-0.13122401079323714	potassium channel, voltage gated modifier subfamily V, member 1 [Source:Xenbase;Acc:XB-GENE-956997]	ATGGAATGCGGTGAAAGTGCCGGCAAAGTGCCGGCGTCCTCCCGTGATGGAGATTCGGACTCAGCGCTTTCCTTGGACTCCAGTGTATTCTGTAGCGACTACTTTCCGGCACCCAAAGATCATTTAACCATCAACGTCGGTGGGAGCCGATTTATCCTGTCCCACAAGGTCCTCTCCAACCACCCAGAGACCCGCCTAGGACGGTTAGTATCTTCTGGAGGGCAGGAGGTATATGAGTTGTGTGATGATGCCAACCTAATGGACAATGAGTATTTCTTTGACCGTAGCTCCCAAATGTTCAAGTATATCATGAACTTCTACAAGACTGGACACCTTCATGTTATGGAGGAACTGTGTGCTGTGTCCTTCCTACAGGAGATCCAGTACTGGGGCATTGAT…
ENSXETG00000041375	NA	-0.19667103604402575	POU class 3 homeobox 3 [Source:NCBI gene;Acc:100497507]	ATGGCCACGGCTGCCTCTAACCCCTACCTCGCTAGCAACAGCATCCTCTCCCCGGGATCCATCGTGCACTCAGACTCAGGGATTGGCATGCAGCCTGGAAGCGCCGCCGTTACCTCAGTGGCAGGCGGCTACCGGGGGGACCCCACGGTGAAGATGGTGCAGAGTGACTTCATGCAGGGGGCGATGGCTGCCAGTAATGGGGGGCACATGCTGAGCCACGCACACCAGTGGGTTACTGCCTTACCCCACGCAGCGGCAGCGGCGGCGGCAGCAGCTGCAGCAGCGGCAGAGGCAGGCTCTCCCTGGTCCAGCAGCCCGGTGGGCATGACCGGCAGCCCGCAGCATCCTCAGCAACAACAGCAGGACGTGAAAGGGGGAGCTGGGAGAGACGAACTGCAC…
ENSXETG00000024193	elk1	-0.1185106178151753	ELK1, member of ETS oncogene family [Source:Xenbase;Acc:XB-GENE-5992134]	ATGAGAGAGTCAGTCATGGACCCCTCTGGGACCCTCTGGCAGTTCCTCCTGCAGTTGCTGGAAGAGCAGAGCCACCGGCACCTCATCTCCTGGACCTCCAACGACGGGGAATTCAAGCTCCTGGATGCGGAGGAGGTGGCGCGACTGTGGGGGCTGCGAAAGAACAAGACCAACATGAACTACGATAAACTCAGCCGCGCTCTCCGGTATTACTATGACAAGAACATTATTAAGAAGGTGAGTGGGCAGAAGTTTGTGTACAAGTTTGTTTGTTACCCGGATCCCGGCAACAGTGAGGTCTCTAAGGACGATGGCAAGTGCAGAGAGAGTGTGAGCGAGCCCAGCCAGCCCCCCAAATCCGCCGACAGCTCCCCCTTTGTCCCCAAGATGGTTCGGAGC…
ENSXETG00000001534	enpp6	0.38707929826708654	ectonucleotide pyrophosphatase/phosphodiesterase 6 [Source:Xenbase;Acc:XB-GENE-977063]	ATGGCAAAGTACAGCACCTTCATCCTCCTCATCCTCTGCCTGTTGCCCCCATCCTCTGCACGCAGAAAGCTATTGCTGTTTCTGATTGACGGCTTTCGCTTTGACTACATCAGTGATGGAGAAATTCAGCATCTTCCCGGCTTCAGGCAGTTTGTGGAAAGTGGGGTTAAAGTAGATTACACAACCCCAGACTTCCCAAGTCTTTCCTACCCCAATTATTACTCTCTGATGACTGGGCGCCACTGTGAAGTGCATCACATGACTGGAAATTTTATGTGGGACCCTAAGAAGAATATTTCATTCAACATTGGTGAGAATGAAGACAGTCGACTGCCACAATGGTGGAATGGAGCAGAGCCTCTTTGGGTCACCATGGAAAAGGCAAAAAAGAAAGTCTCT…
ENSXETG00000020999	acvr2b	0.09827434367933927	activin A receptor type 2B [Source:Xenbase;Acc:XB-GENE-484248]	ATGGGTTATTCTGCCAGGCAGCGGCTCAGACAATGGCTGTTATTTCCGTGCCCAGTGTTTACACGATCTTGGCAGCGGCGGCGTTTGAGAAGCTGTTTTCGAGGAAAATGCCGTCTACTTGGCTCCACTTTTTGTCTCCGATTTATTTTGTGCTCCGGACATGACGAGGTGGAGACGAGGGAGTGCATCTATTACAATGCCAACTGGGAGCTGGAGAAAACCAACCAAAGTGGGGTAGAAAGCTGCGAAGGGGAGAAGGACAAGCGACTCCACTGTTATGCATCTTGGAGGAACAACTCGGGCTTCATAGAGCTGGTGAAGAAAGGGTGCTGGCTGGATGATTTCAACTGTTACGACAGACAGGAATGTATTGCCAAGGAAGAAAACCCCCAAGTGTTT…
ENSXETG00000008388	rgs17	-0.4527289742069044	regulator of G-protein signaling 17 [Source:Xenbase;Acc:XB-GENE-984104]	ATGAGAAAGAGGCAGCAGGCACAAAATGAAGAAATCTCGACAGTGTCTCAAGCTCCTGGTGGGAATCAAAGGCCAAACACATGCTGCTTTTGTTGGTGCTGTTGTTGCAGCTGCTCATGCCTCACTGTTAGGAATGAAGAAAGAGGGGAGCAAGCAGGACGACCGACACATACAACAAAAATGGAGAATATACAGGTTGAAGAAGAATGCCAAACTCCTACTGCTGAAGAAATTTTGTCCTGGTCCCACAATTTTGACAAGATGATGAAAAGCCCTGCAGGACGAAACCTCTTCCGAGAATTTTTACGTACAGAATATAGTGAAGAAAATCTTCTGTTCTGGTTAGCATGTGAAGACTTGAAGAATGAACAAAACAAGAAAATAGTTGAAGATACAGCT…
ENSXETG00000002583	mrps9	0.42072027096411824	mitochondrial ribosomal protein S9 [Source:Xenbase;Acc:XB-GENE-995324]	ATGGCTGTAGTGTGCCGTGGTCTAGGGTTTGCAGCTGTATTACGGGCAGCCGGTACCTGTAGTAGGAAATCGACATTGACTGCTGGAGCCTGTGGCGAGGCTTCTCGACTAATACATAACAGTGCTGCAGTACACAGGAAAAATGTTGCAGCCCCAGGATGCGAAAAGTACACAGAGGCCTTTATTAAAAAACAGATTGAAGAGTACAACATTGGAAAGAGACATTTAGCCAACATGATGGGAGAAGATCCAGAGACATTTACCCAAGAGGATATTGATAGAGCCATTGCATATCTTTTCCCTTCTGGCTTATTTGATAAGAAGGCACGACCAATTATGAAGCATCCAGAGGACATTTTTCCAAAACAGAGAGCAATTCAGTGGGGAGAAGATGGCCGT…
ENSXETG00000007607	sox3	-0.30116612019626604	SRY-box 3 [Source:Xenbase;Acc:XB-GENE-484815]	ATGTATAGCATGTTGGACACAGACCTCAAGAGCCCGGTGCAGCAGAGCAATGCACCGAACGGGGGCCCCGGCACCCCAGGGGGCAAAGGCAATGCTTCTATCCCGGATCAGGAGCGGGTGAAACGGCCGATGAACGCGTTTATGGTGTGGTCCCGGGGCCAGCGGAGAAAGATGGCCCAGGAGAACCCCAAGATGCACAACTCGGAGATCAGTAAGAGGCTGGGGGCTGACTGGAAGTTGTTGAGCGATTCCGAGAAAAGACCCTTCATCGACGAGGCCAAGAGGCTGAGAGCAGTCCATATGAAGGAGTACCCGGATTACAAGTACAGACCCCGCAGGAAGACCAAGACCCTCCTGAAAAAGGACAAGTATTCCCTGCCTGGCAACCTTTTGGCTCCA…
ENSXETG00000008401	oprm1	-0.17139371987212132	opioid receptor, mu 1 [Source:Xenbase;Acc:XB-GENE-1011391]	ATGGACGGTACCCCGAACAGCTCCCTTCGATCTGCCGACAGCCTGCTCAATAGCACCCTTAGCGGCTTGGGTGACAATGGCTCTCAGATTCCAATGATATGTCCGGTTGGCGGCATGGGCAACTGGAGCAGACTGGAAGGCAACCAGTCATACTTGTGCAACCAGTCAGAGACTTTCCCGGAGGACAGCGATTCCATTATTATAGCCATCATCATCACCGCTCTCTACTCCATGATCTGTGTGATGGGACTCTTTGGCAACGTCTTGGTCATGTATGTCATTGTCAGGTACACGAAAATGAAGACTGCAACCAACATCTACATTTTTAATCTTGCCCTAGCTGATGCCCTCGCAACGAGCACCCTCCCTTTTCAAAGTGTAAATTATTTGATGGGAACG…
ENSXETG00000012579	polg2	-0.0407210893404745	polymerase (DNA directed), gamma 2, accessory subunit [Source:Xenbase;Acc:XB-GENE-1009985]	ATGAACTTTCTTCTGTTATCAGCACAATATTGTCTTTATTCCCACCCAGTCAATTGCTTGGGTACTCACCCAAATGTTATGCTGCCAGGGGATGGCCAGGAAAGGAGAAAATCAATTCATACTTACCGAGATTTTCTTTTCCTGGCCATCCTCCCTGGCAGCATGCCCACCCTTTCATTGTCTGTCCAGAAAATCAGGCAAAGACTGAGGAGGACAGGAAGGGGTGGGTATTTAATGCATTGCTTTATTAACCCTTCTGTAATAGGAGAGAGGACAGTGGCCTCCCTTGTCTGGTTCATTTCCCCAAAATCCTCAGGGCAGTGGCAGGATTACTGGCTCCGGCACCGACTCCAGTGGTGGCAAAAGTTTGCTCAGAGCCCGTCGGGGTTCGGCTGCAGG…
ENSXETG00000018164	sema4a	-0.20710732812564164	sema domain, immunoglobulin domain (Ig), transmembrane domain (TM) and short cytoplasmic domain, (semaphorin) 4A [Source:Xenbase;Acc:XB-GENE-5914424]	ATGCCCACGTGGAAGCGCTGTTGGGGGCTGCTCCTGGCGCTCCTGGCGTTGCTGCCCTGTTTGCCCTCCGACCTGGTTCCCAGGATCACATTCAGGCACGGTGAGTGGTGGGATGGGGGGGCGGGGTTAGGGGGGGTGGGATTCAGGATGATAAAAGCCCACATGACAGTTCTGCCCCGCGGGGTAACTCTCCTGCTAATTTGCCCCCCGCAGACGGAGTGCTTTAACTTCATCCGGATCCTGGCCCCAGTGAATGGCAGCCACCTGTATACCTGTGGGACCTACGCCTTTAACCCTACCTGCACCTACATTGAGTTGGACCATTTCTCAATGCCCAAGAACCCCAATGGAACGATTATCACAATGGATGGAAGAGGCCAGTCACCCTTTGACCCCCAA…
ENSXETG00000016213	XB5957220	0.36055142206769664	uncharacterized XB5957220 [Source:Xenbase;Acc:XB-GENE-5957221]	ATGGGTAACACAGCTCTGATAGCTACCATGACTTCCTTTGTCTTTCTGCTGGTGTGTTGGATCATCAAAGACAGTATTAAAATCAAAAATATCCATGAAAAGCACGTGCTCATCACTGGATGTGATTCTGGGTTTGGGAATCTGTTGGCACAAAGGCTTCATCGGAAGGGTTTTGGTGTTATTGCTGCCTGCTTAACTGAAAAAGGATGCCAGGATCTGATAGCTTGCACCTCCCCATCAATGAAAACTGTGATATTAAACGTGACTAATGCAAGAAGCATCGATCAAGCCGTGCAATTTGTTGCAGCGGAAACAGGGAGCAAAGGGCTCTATGGCTTGGTCAATAATGCTGGAAGAGCCACACCCATTGGACCCACTGATTGGTTGGATATGGAAGAC…
ENSXETG00000012352	slitrk4	0.12305553142677525	SLIT and NTRK like family member 4 [Source:Xenbase;Acc:XB-GENE-983538]	ATGATTTCTCCCAGAAGTCTGAGGCTGTTCTGTCACTGCCAGAAGATGTTTGTGTGGCTTTTCCTCTTTCTCTGCACTCCAATCTCCTCCACCAACCCTGACTCTGAACTGTCCCTTGAGATCTGCAATGTCTGCTCCTGCCTGTCAGTGGAAAATGTTATGTATGTCAACTGTGAGAAGGTGGCATTGTACAGACCAAACCAGCTCAAGCCACCCCCCTCCAATTTCTATCACCTGAACTTTCAGAACAATCTGCTAATCATTTTATACCCCAACACCTTCCTCAATTTCACGCATGCTGTTTCTCTGCAGCTCGGCAACAATAAATTGCAAAATATAGAGGGAGGAGCTTTCCAGGGACTCAGTGCACTGAAACAGTTGCACTTGAACAACAATGAA…
ENSXETG00000016189	celsr3	0.3052025559168069	cadherin EGF LAG seven-pass G-type receptor 3 [Source:Xenbase;Acc:XB-GENE-852799]	ATGAGACAAGGTACTATGGCTGCTCTGCTGAGGGGAGCCAGCCTGCCTTGCCATCTCCTCCCGCTGCTTCTCATCCTCCTCATCCCTTTGTTCACTTCCAGCCGGGGAAAGCATGCAGGGACCTGGGACACAGCTGGGCCGCCCCCTGCCCATCCTCTAGGCACCGACCGGCACAGCCTTGCCCACAACAGGTCTTCCATTCAAGGGCTTGTGTGGGAGATCTACTGGGCTACTATGGCTCAGTGTGAGGCCAAGAGGAATGGCAGCCAGGAGGGGCTCTTGGGGGGCCCTTGGAATTTAACCCTTTGTTTGCAAGGAAACTCCACAGGACCCAATGCCACAGGGACGCTTGATGGATTTAGGGGGTGCAGTTTTGCCAAGTGTCTACTCAGGACAGCT…
ENSXETG00000025752	rnf4	-0.6414372119284901	ring finger protein 4 [Source:Xenbase;Acc:XB-GENE-1016982]	ATGACCATGAAACAGGCTCAAAGAAAACGTAAAGGAGCAGAGCCAGGTCACTCAAAGTCGTCCAAGAGAAGGGCGCCAGGTTCCACTGCCGCAATGACAGCGGCGACGGAGCCCATTGAACTGGAAAGTGGGGAAGAAGTTGTTGATCTTACGTGTGAATCCACGGAACCAGTCGTTGTCGACTTGACTAACAATGACTTGAGTATCAATGACTCTGTTGTTGTAAATACCCCCAGGCAAAGAAGGGCTCTATCTAGACCTTCCCAACAAACAACCAGCTGTGTATTAAGTAGTGATGATGAAGACTCAAGACACGCTGACCACTTTGCTGCAAATAAAGATATTTCCTCACAAGCCTATGGTAGTTCAAGATCTTCTTCAGGTAAAGTGAGTTGTCCG…
ENSXETG00000018016	sybu	-0.18919485124720764	syntabulin [Source:Xenbase;Acc:XB-GENE-979776]	ATGGGACCCCTGCAGGAGAGCAAGAAGATGCAGGAGAGAGAGCTTGCTCGCAGCCGCATCCCTCGCCTGGTCCTGCGCCCTTACTTACCCAAACAGAAAAAGTCCCCGTCTTCCGAATCTCCTTTCTCCGAGGAAGAGAGCAAAGATTTCCATTCCAGCCGATCTGCAAGGACCATAAGTAGCAACAGCTTCTGCTCAGATGACACCGGTTGCCCCAGTAGCCAGTCGGTGTCCCCAGTGAAAACTCCCTCAGACGCCGGCCTCAGCCCAATGGAATTCTGCACTGGAAGTGAAGATGATTTTGGCCGTAAGAGAGTCAGTGTTGGCACCTTTGCCGATACCAGTGCTCAGCCTGCCCGATTCAAGAAGGAAATGAAGATTTGTCTCCTCAAGACAGGC…
ENSXETG00000001533	stox2	-0.315187307868012	storkhead box 2 [Source:Xenbase;Acc:XB-GENE-5852839]	ATGCCCCAGGAGATGAAACATTCCCGTCAGATTGCCCCGCATTCCCTGGCTGTGGTGCTCAGTCACTTGGGTTCATGTGAGAGGCTGGGGCTGCCGGAGGAAAAGCTGCAGCGGCACCATGTTGGTTATGAGATCTTTGCGGACTTTAAAGCGGAGAACATGCAGCATTTCTGGAACAGAAGGGTGACCCATGCCATCTCCGAGACCTTCTTCCTGGGCTGGATAGACGAACATGTGCTGCTCATCCAGGGCAAGGAGGAGCACCTAGGGGTGCTGAGGGAGGGCTGGGTCAGGAGGTCCCTAAAGCCCCCGCCTGGATTTACAATCAAGTATCTGGGTGATGTGTCGCCCATCAGCATGTCTCCAATCAGCCAGTCACAGTTTATTCCTCTTGGGGAA…
ENSXETG00000001613	emilin2	0.1622024038047362	elastin microfibril interfacer 2 [Source:Xenbase;Acc:XB-GENE-978931]	ATGATCCCGTTCCGCGCAATGCAGTCTGGCGGGGCTGCCCCTGCTCCGCGCTCCTCGGCTCCTCTGCTACTGGCGCTGCTCTGTGCTGTCCTAGTACTGAGCGGGGCCACTCCGCCCCTCACCTATCAGCGGTCGGGCCAGAAGGGCAAGAACTGGTGCGCTTACATTATCAATAAGAATGTCAGCTGCACAGTCATGGATGGGACGGAGAGCTTTATTCAGCCTCAGTACAGATGCGCCTGGAATCAGATCCACTGTCAGCCAACAATGGCATATAGAGTGGGTTTCCGACCAAGATACACCACGTCGTACAAAGTAGTCACAGAGTTGGAATGGAGGTGCTGCCCTGGCTTTAAGGGGGTGGATTGCAAAGATGGTCCGTCTGAAGAGGCCAAGTCT…
ENSXETG00000010706	myo7a	0.6877997929922843	myosin 7a [Source:Xenbase;Acc:XB-GENE-494060]	ATGTACCAACGCCGTGGAGTGGAGGAAACGTTGGAGAAGGATCAGGGCAAGTGGGCTCTGCTGCGTAACGTTAATCAGGCTCTGAAACCAAGCACTTTGCTGCCGGGTGATTATGTCTGGTTGGACCTCAAAACAGGGCGTGAGTTTGATGTCCCGGTGGGAGCTGTGGTCAAACTTTGTGACTCTGGTCAGATCCAAGTGCTGGACGATGAAGGCAATGAACATTGGATTTCGCCCCAAAATGCGTCTCATATCAAACCGATGCACCCGACATCAATCCATGGGGTGGAAGACATGATCCGTCTGGGAGATCTCAATGAGGCGGGAATCCTGCGTAACCTGCTCATCCGATACCGCGAGCATCTGATATATACTAACTGCGGCGGTAGGACATATACC…
ENSXETG00000020570	colgalt1	0.20354925262216014	collagen beta(1-O)galactosyltransferase 1 [Source:Xenbase;Acc:XB-GENE-952955]	ATGTCCCAGCCCGGAGTGGAGCGGCTCCTGAAGGGGCTGCAGTTACTGCTGCTGGTAGTGCTGGGGCTCAGCGCAGGATACTTCCCGGAAGAGCGATGGAACCCGGAGTCTCCGCTCCGTCGCCCTACGGTCCTGATCGCCCTGTTGGCCAGGAACTCCGAAGGTTCCCTTCCTGAGGTGCTGGGAGCGCTGGAACGGCTGCACTACCCGAAGGAGCGTATCTCGCTATGGGTTGCTACAGATCATAATATTGACAATACGACCCAGATGTTGCGCGAGTGGCTGATCAATGTGCAGAATCAGTACCACCACGTGGAGTGGAGACCGCAGGAGCACCCAAGGTGGTTCAGGGACGAGGAAGGCCCCAAGCATTGGTCCCACGGCCGGTACGAGTATATC…
ENSXETG00000010068	sumf2	0.4473997217034553	sulfatase modifying factor 2 [Source:Xenbase;Acc:XB-GENE-5815462]	ATGGCGGCGAATTTAGCTTCCGGTTTAAAAAGGTCATGTTGTGATAAAGCCATTGGCTGGCAGAGTTATATGTCAGTACGGAATAGTTCAATTGTGAGAATGAGCGGTACAATTGTGGTTCTGCTGGGTCTGGTTGTTTTAGGAATAACGCAGGGCCACGAGGATGCTGATAACATGGTACAGCTTGATGGAGGACAGTTTGATATGGGAACAAAGGCCTCTGATGGTAAAGATGGTGAAAGCCCTGTCAGGCAGGTGAAAGTTCTGCCTTTTGCTGTTGACAAGTATCCAGTTACCAACAAAGATTTCAGGGAATTTGTGCGGGCAAAGAAATACAAGACTGAAGCAGAGGCATTTGGGTGGAGTTTTGTATTTGAAGACTTTGTATCAGAGGAACTG…
ENSXETG00000030163	ADGRG6	0.17857063978379686	adhesion G protein-coupled receptor G6 [Source:NCBI gene;Acc:100489626]	ATGGTCTCATATTTGTTTTCTTCTGGCTCCCACATGGATCCAGTGCAAGTTTTTGCTTTCATTAGCCACAGGCATGTACTTTGTGCTGTCTGCAGGTTAACCCTGACAGCACCTACTGGAAATGTCACTTCGCCTTGCTATCCCCAATTATACCCAAACAACCAGGACTGCAAGTGGATTATACAGGCTCCAAAGGGATTTATCATTCAACTCACATTTGTGGATTTTGATGTTGAGGAAGCTCAGAACTGTGTGTATGACTATGTTTCTATAAGCAATGGAGAAACAACAACCAAATATTGTGGTGTAACAGCAAGAGGCCTTACATATAACTCCACTGGGAATATGATGAATATATCCTTTGTTAGTGACTTTAGTATCCAAAGGAAAGGTTTCACT…
ENSXETG00000003455	acap2	0.19502347996762523	ArfGAP with coiled-coil, ankyrin repeat and PH domains 2 [Source:Xenbase;Acc:XB-GENE-990716]	ATGAAGATGATAGTGGATTTCGAGGAGTGCCTAAAGGATTCGCCTCGCTTCAGGGCATCTTTAGAAGATGTTGAAGGCGATGTGGCCGAGTTAGAAATGAAGCTTGATAAGCTGGTGAAGCTTTGCATTGGAATGATTGATGCTGGAAAAGCTTTTTGTGCTGCCAATAAGCAGTTTATGAATGGAATTCGGGACCTTGCCCAGTATTCTAGCAAAGACTCTGTGATTGAAAGCAGCTTGACAAAGTTCGCAGACAGTTTACAGGAGATGATAAAGTACCATGCAATGTTATTTGACCAAGCCCAACGATCAATCAAAACACAGCTTCAAACATTCGTTAAAGAAGATCTTAAAAAATTTAAAGATGCCAAAAAGCAATTTGATAAAGTCAGTGAGGAA…
ENSXETG00000004288	slitrk2	-0.011405556549462986	SLIT and NTRK like family member 2 [Source:Xenbase;Acc:XB-GENE-964776]	ATGCTGAGCAGCATTTGGTTGCTAAGTGTTATATCACTGACTGGGATCTTAAAGACAGAGAGTCGGAAAACTGCCAAAGACATATGCAAGATCCGCTGTGTGTGCGAGGAAAAGGAGAATGTGTTAAACATAAATTGTGAGAATAAGGGGTTCACCAGCGTCAGTTTGCTCCTGCCTCCCCAGTCTAGAATCTATCAGCTTTTCCTTAATGGTAACTTACTAAGCAGACTGTATCCCAATGAGTTTGTCAATTACTCCAACGCTGTGACTCTCCATCTAGGCAACAACGAACTACAGGAGATCAAGACTGGGGCTTTCAACGGGCTAAAGACTCTGAAACGGCTGCATCTAAATAATAACAAACTGGAAGTGCTCAGGGAGGAAACTTTTCAGGGCCTC…
ENSXETG00000009386	caap1	0.36302300831409684	caspase activity and apoptosis inhibitor 1 [Source:Xenbase;Acc:XB-GENE-5731696]	ATGGCTGGTGCCAAGAAAAGCTCTAAAGAAAAGAAAAAAAGGCGAAGGTCAGACTCTTGCGAAGGTGGAACCCGAGTTGAAAGAAAGAGGAGGTCCACGGATGTCAGCCACACTCAGCATGAATCTGATATTTCCCATTTAGCTGCTGCCACCAAGGAAGAGGAAGAAGACGAACCTAGTGACATAGAAGAAGGAGGCCTAGACCTAAATGTTCCTCTTAAGCCAATTAGCTTCTATATTTCTGATAAAAAGGAAATGCTTCAGCAGTGCTTCAGAGTGGTAGGGGAGAAAAAACTGCATAAAATGCTTCCTGACTTATTAAAGGTCTATTCTACTGACGAGATCAAACAGATGTGCCTGGAACAGCTGGAGTTGCTTTCTGAAAAGAAGCTTCTGAAA…
ENSXETG00000023752	adamts14	0.13319365890480714	ADAM metallopeptidase with thrombospondin type 1 motif 14 [Source:Xenbase;Acc:XB-GENE-490125]	ATGAACGCTAAAAGTTCTAAACCATTAAAAGTTCTTATTTATTTATTCCTTGTAGAATCCATATCTGGGAAGCTAAGTGAATACGGGGTGATTGTCCCATTCAGTACGGATCACCTAGGGCATTATATTTCGCACGTGGTGTCAGCAGCAGGAAGTAGCAGAGGCGGTCTGACCTCAGAGCACCCTGGCCAGACTCAGAGGGTTGCCCGCAGTGCGCCCGAATCATATGATAGGCACTTATACTTCAATGTCACAGTATTTGGCAAGCAGCTGCATCTTCGTCTCAAGCCTAATAGACATCTGGTTTCTCATGGGGCTACTGTGGAGTGGCAGGAGGACTTCCAAGAGACCTCTCAAGGGTCACTCCATGCTGGGTGTGTGTACACAGGAGACATCACC…
ENSXETG00000037896	pheta2	-0.4259010979230871	cocaine- and amphetamine-regulated transcript protein [Source:NCBI gene;Acc:100492550]	ATGGGCATCTTAAAACAGAGAGCATCTTTTATCAGCACAATGGCAAGCCACCGACTACACCTGGTCTGTCTTTCCCTGTCTTTACTCCTGTTTCTGGTCTACAGTGATGAGTCAGTTGGGGTCAGATCAGCAGAACCAGCAGACAGCAGCCAAGAGGAAAAAGAACTGATAGATGCTTTACAGGAGGTACTGGAGAAGCTAAAAAGTAAAAGGATCCTTCCTCTGGACAAGAAACTAGGATGGGTGCCATCGTGTGATGCTGGTGAGCAGTGTGCTGTAAGGAAAGGGGCACGAATTGGCAAGCTCTGTAACTGCCCAAGGGGAACTGCCTGCAACTTTTATATTTTGAAATGCTTATGA
ENSXETG00000026942	rplp0	0.8354693824593524	ribosomal protein, large, P0 [Source:Xenbase;Acc:XB-GENE-976211]	ATGCCCAGGGAAGACAGGGCTACCTGGAAGTCCAACTATTTCCTGAAAATCATTCAATTGCTGGATGATTATCCAAAATGCTTCATTGTGGGGGCGGACAATGTTGGTTCAAAACAAATGCAGCAGATCCGTATGTCCCTGCGTGGAAAAGCTGTGGTGCTCATGGGAAAGAACACAATGATGCGCAAGGCTATTCGTGGTCATCTGGAAAACAACCCAGCTCTGGAGAAACTTCTATCTCACATCAAGGGTAATGTGGGCTTTGTTTTCACAAAGGAAGATCTTACTGAGGTCAGAGACATGTTGCTGGCAAATAAGGTTCCTGCCTGTGCCCGTGCAGGAGCAATAGCACCTTGCGGGGTCGTTGTGCCCGCTCAGAATACTGGATTGGGCCCTGAA…
ENSXETG00000036392	map1s	0.24498946090650073	microtubule associated protein 1S [Source:NCBI gene;Acc:100494497]	ATGGCGGCGACTCGGGCGGGTCCCGGGCATCTGCGGTGCTCCGTGCTCATAGTGTACGGGGAGATCCGCCGGGGGCCTGGCCTTGTGCGCAGGGCGGTGAGCGAACTAAAGAGAGGCTTCTGTTCATGGGATATCGATCCATCCTTCTGTAATCTGGATGAGCAGCTGAAGTTGTTTGTATCCCGTCACTCTGCCAGTTTCTCCTCGGATGTGAAAGGTATGTTTGCTATTTTAAATAATCAAACAGCATTGCTTTTTACCCTATCCCTTATTACCCCATCCAAAACACACACCTATATCCATAAATTGATTTGCTATGAATCTCAACACAAGTTACTGATTTTCATTGGCCCTTTCCTGGAAGGAACTGGGGAGATACTCCTTCAAGATGGTGGAAAC…
ENSXETG00000021514	dcp2	0.2405564366053222	decapping mRNA 2 [Source:Xenbase;Acc:XB-GENE-966970]	ATGATGCAATGTTCTGGATGGCATCACTTTCTGCGCTTGATGCTAGTGTTTCACTGGCCTTTCAGTTCTGCTTGCGGAAGTGACGCAGCACTCACTGTCACTGTTGTTGTTTCGCTTCCTCCACTGGCTCCTCCCTCGTTCCCGAGTCGCAGCCGGGCTCTTGGACCGCGCTGTCTCCGTAATGTTCCTCTGTCCGACATGGAACCCAAACGCTTGGAGGTGCCGGACGGAGTCCTTGATGACCTATGCAGTCGGTTTATTTTACACATTCCCAGTGAAGAAAGAGACAACGCTATTAGACTTTGCTTCCAAATTGAACTGGCCCACTGGTTCTATCTGGACTTCTGGATGCAGAACATTCCAGGCCTGCCTCAGTGTGGGATAAGAGATTTTGCCAAA…
ENSXETG00000012584	cep95	0.07625323303274975	centrosomal protein 95kDa [Source:Xenbase;Acc:XB-GENE-962343]	ATGGGGACGGCTGTATCTTGGGTGGATGTTGCCAACAGCCTTCTGAGTAAATGCCACATTAACCTGCAAGTCCAGGAAGTGTCGGGATGTGACGCTCGTGTATTTCTTGCTCTCTACGAAGCTATTTTAGGAGAGAAGGTACCAGATTTTATTCCTGACGCTCAGAATCCAGAAACCAACGCTCACAATGTGCAGTCTGTTATCGACTCTCTTGCTCTGGATTATCTGCAGGTCAGCCTGTCCCATATCACAGGGGAAAACATTGTGCGTGGGGATACTGAATCCATCCAAAACCTTTTGGAAATATTTGACGGCTTGCTGGAGTATCTCACCGAACAAATCAGTGAAGCGTCTTCCCAAAATGGAGAGGATTTAGATGATCGTGACTTCAGCCAAAGG…
ENSXETG00000002582	gpr45	-0.27542917219539226	G protein-coupled receptor 45 [Source:Xenbase;Acc:XB-GENE-1009027]	ATGGGCTGCAATAATACTGCCCTAGACAGTTGCATGCTTCCCAATCTCAGCATTGCTACTGCTCCTCCAGACTCTAGGTTTGCATTTTCCACCCCACTCAGGATATTGTTGGCAATAATAATGATAGTGATGATTGCTATTGCTTTTTTGGGCAATGCCATTGTTTGCCTTATTGTCTATCAGAAGCCAGCCATGCGTTCAGCAATCAATCTTCTCCTGGCAACACTAGCATTCTCTGACATCATGTTGTCCCTTTTCTGTATGCCCTTTACCGCAGTAACAATTATAACTGGGAGCTGGCTATTTGGAACTCAGTTTTGCCAGATATCAGCCATGCTGTACTGGTTTTTTGTGTTAGAAGGTGTAGCCATTCTACTTATCATCAGTGTGGATCGTTTC…
ENSXETG00000001891	elk3	-0.24929268336509341	ELK3, ETS transcription factor [Source:Xenbase;Acc:XB-GENE-853037]	ATGCTCTGGTCGGAAACATTAGAGTTACGGGATATGGAAAGATCAGCATCGTTATGTTGCCATGAGAAACTGTTCCCCCAAGTACAGTGGGTATGTATGGAGAGTGCAATCACACTGTGGCAGTTCCTGTTGCAATTGCTACTGGATCAGAAACATGAGCACCTTATCTGCTGGACATCAAACGATGGGGAATTCAAGCTGCTCAAGGCTGAAGAGGTGGCCAAACTCTGGGGGCTTAGGAAGAATAAAACTAACATGAACTACGACAAACTGAGTCGGGCCCTTCGGTATTACTATGATAAGAATATTATCAAAAAGGTTATCGGACAGAAATTTGTGTACAAGTTTGTTTCCTTCCCGGAGATACTAAAGATGGATCCGCACTCGGTGGAAGTCAGC…
ENSXETG00000010192	pde4dip	0.29469840935735203	phosphodiesterase 4D interacting protein [Source:Xenbase;Acc:XB-GENE-982015]	ATGAAGGAGTCCTGCCGGATCTGCGGCCGGGAGCTGTGCGGGAATCAGCGCCGCTGGATCTTTCACACCGCCTCGAAGCTCAACCTGCAGGTGCTGCTGTGTCACGTCCTGGGCAGGGAGGTGCCCCGCGATGGCAGAGCCGAGTTCGCCTGCAGTAAGTGCGCTTTCATGCTGGAGCGGATGTGCCGCTTTGACACTGTCATCGCCCGCATCGAGGCGTTATCCATTGAGCGGCTGCACAAGCTGATTTCCGAGAAGGAGCGCCTCAAGCACTGCCTGGCCGGCCTCTATAGGAAGCATAACAGCGAGGAGGATGGGCCAGACACCGGGCCAGACACCGGGCCAGACAGCAGACCAGCGGCAGAGGGCGGCACAGTGGACATATCCGAGCTGCCAGAT…
ENSXETG00000035081	cbx6	0.4442696098303225	bile salt export pump [Source:NCBI gene;Acc:100489744]	ATGACAAACCTCATTTTGTACTTGATAATTTTTATGATGGTCATCGGAGCCTTGTGTGCCTTAATCCATGGTGCTGCCCAGCCATTGATGCTTTTGATATATGGTATGATGACTGACACCTTTATTACATATGACAGAGAGACGCAAGAGCTTCAGGATATAAATAAGGAATGCATCAATGATACAATCTGGTGGAAGAATGGAACTGAATACATTGTAGACAACAATGTGGTGTCTGCATTTACCTGTTCTATTCCATCTAACACATTCTACTCTCACCTCTTACTCGACAGAACTAACATTGAAAAAAAGATGACGGAATTTGCCTACTACTATATCGGTATTGGAATTATTGTTCTGGTTCTAAGTTACTTTCAGATTTCGCTATGGGTCGTGGCG…
ENSXETG00000004908	b3gnt3.1	0.12669272744262336	UDP-GlcNAc:betaGal beta-1,3-N-acetylglucosaminyltransferase 3, gene 1 [Source:Xenbase;Acc:XB-GENE-5815508]	ATGACTTTCAGCAATTCATATGGAAAGAACAGACATCAGCTGGAGCTTAAAGTCACAACTCTGCTAGGTGCTTTTCCTCATAATACAACTGCTCTGCAACAACACAGGGCAATGACAAAAAAACATTTCTGGAAATGTCTTCTGGGATCAATAGCAGCTGTCATCACCCTCCGATTCGCTTTGCACTTCAATAGCTTCTATGTTCTTAATAATGTTATTGATAAAACAGAAGAGTTATCTTTTTCTAATGCGATAATGTCAAACCAACCTATAATCGAGTTACCCTACTCTGAATGCAAGGAAGACACTTCTGCCAGAAACGTAACCAATTTTAATAAAGAACCGCAGAACATGAAGGATTTTTTGACCTACCGTCATTGCAGGAGTTTTCCACAGCTT…
ENSXETG00000021359	nup88	-0.04821193423109951	nucleoporin 88kDa [Source:Xenbase;Acc:XB-GENE-1004636]	ATGGCGGCGGGGGAACATTGGCAGAGCTCGCTTAGTGAACATGCGCTCTTCTCCCGTCTGAAAGAACGGACGAGGGAAGTCGAAGAACTTAGGGAAGAGGGTGAAAGGCGGACAAGGAAAGACAAGCAACTGAGGAACTTGCTGTGCGTCCTCGATGGAGATCTATTGGTGTGGGACTCGGAGGAGTGCGCCTTTCTCACTGTCAGACTGAGGAGTCTAAGTGTGGAGAGCACAGGGAGCAGTGGTGAGCAGAAACTGCTTTGTACAAATCCTCCACTTTTTGAAGTTAATGAGGTGTTGCTAAGCCCCACACAACATCATGTTGCTCTGGTTGGAAGCAAAGGAGTGATGGTGCTGGAGATTCCTAAACGCTGGGGAAAGAAATCTGAATTTGAGGGC…
ENSXETG00000019647	fmr1	0.19320583732103022	fragile X mental retardation 1 [Source:Xenbase;Acc:XB-GENE-977113]	ATGGAGGAGCTGGCCGTGGAGGTGCGGGGCTCCAATGGAGCCTTCTACAAGGCATTTGTGAAGGATGTACATGAGGATTCTATAACTGTCACTTTTGAAAACAACTGGCAGCAAGAGAGACAAATCCCATTCCATGATGTAAGATTTCCACCTCCATCAGGGTATAATAAGGATATAAATGAAAGTGATGAGGTAGAGGTGTATTCCAGAGCAAATGAAAAAGAGCCATGCTGCTGGTGGCTTGCTAAAGTTAGAATGATAAAGGGTGAGTTTTATGTTATAGAATATGCAGCTTGTGATGCAACTTACAATGAGATAGTCACTATAGAACGGCTGCGATCTGTTAATCCCAACAAGCCGGCAACAAAAAACTCATTTCACAAGGTTAAACTGGACGTT…
ENSXETG00000021109	vta1	0.24190737280826	vesicle (multivesicular body) trafficking 1 [Source:Xenbase;Acc:XB-GENE-984112]	ATGATAGTGCAAACCATTATTTTTTTCTCTCTACAATTCACAGGTCGTTTGTATTCCATGCAAACTGGCATGAAGATCGATAGCAAAAGTCCAGAGTGTCGCAAATTCCTCTCTAAACTCATGGATCAGTTGGAAGCTTTGAAAAAGCAGCTGGGAGATTGTGAGTCTATAACTCAGGAAATAGTTGGCAGTGCTCATGTGGAGAACTATGCTCTGAAAATGTTCCTGTATGCAGATAATGAGGACAGAGCAGGGAGATTCAATAAAAATATGGTAAAATCTTTCTATACAGCTAGTCTTCTTCTTGATACACTGGCAGTATTTGGAGAGCTCACCGAAGAGAATGTTCAGCACAGGAAATATGCTAGATGGAAGGCAACCTACATCCACAACTGTCTT…
ENSXETG00000018572	ppm1f	0.03719353208097695	protein phosphatase, Mg2+/Mn2+ dependent 1F [Source:Xenbase;Acc:XB-GENE-948958]	ATGGAGCTGGAAGACGGGGCCCTTCGGGAGTGCCTGCTGGCTCTACAGCGCCATCCCCCCGGGCAAGACGAACAGCTGCGACCTCAAAGCCGCCATGTGAGCCAAGCGGAGGCTGAAGGGGAGCTCACCGAGTTGTTGCTGAAGTTGTTAGGAAGCAGGGTCACACCTTCACATATTGCTGCCTTCCTGACCCAATCTGTTGTGCATAAAGCACTGCAAGGAGACCTGTCTTCCTTTGCAAAGAAGAATGAAACACAGACAACAGAGAACAATGAAGAGAATGAGCAGCTTCTGTGCTCAGAGTCCTTGTGTCATTACTGTCTTCAATGTCTGCAAGAGGTCATCAGCCAGTGGCTTGAGCAGCTGCCACCCTTGCCGCCGCCTCCACATGAGCTCTGT…
ENSXETG00000019069	trappc11	0.4284756954473843	trafficking protein particle complex 11 [Source:Xenbase;Acc:XB-GENE-5931148]	ATGAGCCCTACACAGTGGGACTTTCCTGTGGAGCTATGCTGCCGCCCAATGGCCTTTGTGACCCTTACAGGTTTAGATGTAACTTTTAATGCAGTTCACCGAGCTATCTGGGATGCCTTTTGTGCCAACCGAAGGGCAGATCGTGTACCTATCTCCTTCAAGGTTCTACCTGGTGATCACGAGTATCCAAAATGCAGAACAAAGAGAACGTCTTACGAATGGTACATCCCAAAGGGAATTTTAAAGACAGGCTGGATGAACAAGCATCTAAACCTGGTGCCTGCATTGGTCGTGGTGTTTTATGAACTTGACTGGGATGAGGCCCAATGGAAAGAGAAACAGTCGGAATGTGCAACCAGAGTTGAAATTGTCAGGCAGAGTTTGCAGGGGAGAAACACA…
ENSXETG00000002581	tgfbrap1	-0.008677234919008875	transforming growth factor beta receptor associated protein 1 [Source:Xenbase;Acc:XB-GENE-1009020]	ATGAGTGTGCAGGCGTTTCGGCTGGTGTGTGCATCAGAAAGGGAGCAGTTTCCCCAAGGAATTCACATTGAATGCTTGGAATGCTCTGGCCATGATCTGTACCTTGGCACCAGTGACTGTGTTATTTACCATCTTCTGCTAGTGGAACAGCAGCTCTCTGAGCCCACATCTTTAGTTCAGCAAACAGACCAGCCCTGTACCAGCTTTACTACTACTCAGCAAAGGCAGAGACAGCTTGGACTAAAGAAGCCTATTTGTGAACTAAGAGCTGCCTCAGCTTTGAGCAGGCTGCTGGTGCTCTGTGATAATACTATCAGTATACTGTGCAGTGAGTCACTTGAACCCCTTCCAGCACCCAAGATTCGGGGGGTCCTCACTTTTACCCTCAATGAGAACCCT…
ENSXETG00000037813	cfap99	0.07339965045152672	cilia and flagella associated protein 99 [Source:NCBI gene;Acc:100495334]	ATGGTTAATTATAGAAGATGCACTGAGCTTGTAGCTCACCTTCTTAGTAAGTACCACCCAGAGGAGCAGAGCCTTGAGCACTTCCTGGAAGAGTCCACAGAAGATTTCCAGAGCCTTAATGATGAAGAGGAGAGATTTGTCGGCGCGGCTCTCTGTGGAAGTGTGCAGTACAGAGCTCTCCTGGATACAGTGGTGCGCGCTTTCTATGCCAGAGACGGCAAACACTGCAAGCAGTCGGAGCAATATCTCTTTGTTGTGATTGGCTACCTGGCAACATTTCAGTTGGAAGAACTCGGCCTACAAACCTTTGTTAGAATCATCACATCTCAGGATGTCACTAAAATGTGCAAGTTTCTCAGCTTTTTCTTTAATGTTGTGAATTTGAACACGTGGATAAAA…
ENSXETG00000016431	fcho1	0.029103917958778508	FFCH and mu domain containing endocytic adaptor 1 [Source:Xenbase;Acc:XB-GENE-5946032]	ATGTCTTATTTTGGAGAACACTTCTGGGGGGATAAAAACTCTGGCTTTGCTGTTTTGTACCATAATATGAAACATGGGCAACTATCTGTCAAAGAACTGGCAGACTTTGTGCGAGAAAGAGCAGCCATTGAGGAATCGTACTCAAAATCCATGCAGAAACTGTCCAAGATGGTCAGCAGTGGGAGCCATTTAGGGACATTTGCTCCCATGTGGGAGATGTTCAGAGTGTCTTCAGACAAGCTAGCTCTCTGCCACCTGGAACTAAGCAAGAAACTGCATGACCTTATCAAAGATATCAGTCGGTATGGAGATGAACAAATCAAAATGCACAAAAAGTCCAAAGATGAGATGTCTGGTACCCTGGAGGCCATACAGTTGCTTCAGTGCAATTCTCAAATG…
ENSXETG00000036789	NA	0.7441958792987216	NA	ATGGGAAAGACCAAAGAGCTGTCCAAGGATGTCAGAGACAAAATTGTAGACCTGCACAAGGCTGGAATGGGCTACAAAGCCATTAGCAAGAAGCTGGGAGAGAAGGTGACAACTGTTGGTGCGATTGTTCAAAAATGGAAGGAGCACAAAATGACCATCAATCGACCTCGCTCTGGGGCTCCACGCAAGATCTCACCTCGTGGGGTGTCAATGATTCTGAGAAAGGTGAAAAAGCATCCTAGAACTAGACGGGAGGAGTTAGTTAATGACCTCAAATTAGCAGGGACCACAGTCACCAAGAAAACCATTGGAAACACATTACACCGCAATGGATTAAAATCCTGCAGGGCTCGCAAGGTCCCCCTGCTCAAGAAGGCACATGTGCAGGCCCGTCTGAAG…
ENSXETG00000035980	NA	-0.23237451885717392	oocyte zinc finger protein XlCOF7.1 [Source:NCBI gene;Acc:100493797]	ATGGTGAAATCTAAGAAAGCCTCCAACTTCCTCAGAGGGTTGGTAGTATCTAATAAGTTTTCAATGAGACACAAGATGAACAAAACAAGGAAGCTGGAGGATGAGCATATTTTAGATCATACCATGAAGATTATTCATCTTTTGACTGGACAGCATTATATTATTATTAAGAAGCACAAAGACTACATCATTGAGAGTAGGACCGATAATCTTGTTGTGGAGCCTGTGCCTTATTCAAATATACATGAAAGCAACAAAGACAAGAACCTGTGCTATGGGAAAATGTTAGGACTCACTAAAATGATTATTCAGCTCCTGGCTGAAGAGTTTTCTTCTGATTATCATGAAGATGCACAAGAAGAGGGTAATAAGCACTTACACAAGGAGAAGAACCAGTTC…
ENSXETG00000041050	nucks1	0.030285160500688718	gap junction protein epsilon 1 [Source:NCBI gene;Acc:100489464]	ATGTCTTTAAATTATATCAAGAACTTCTATGAAGGATGTCTCAGGCCTCCAACAGTGATTGGTCAGTTCCATACTCTCTTCTTTGGTTCTGTGCGAATGTTCTTTCTTGGTGTATTGGGCTTTGCTGTATATGGAAACGAAGCTTTACATTTTAGCTGTGAACCTGACAAGAGGGAGGTGAACCTGTTTTGTTACAATCAATTTCGACCGATAACTCCTCAGGTATTTTGGGCCCTACAGCTAGTGACAGTATTGGTCCCGGGAGCTGTATTCCATCTTTATGCAGCCTGTAAGAGTATTGATCAAGAAGACATTCTCCAGAAGCCTGTCTATACTGTATCTTACATTATATCTGTGCTGCTAAGGATTATCCTGGAGGTGGTAGCATTTTGGCTTCAG…
ENSXETG00000012607	cpt1al	0.4062762358348304	carnitine palmitoyltransferase 1A (liver) like [Source:Xenbase;Acc:XB-GENE-5770297]	ATGGCAGAAGCCCACCAGGCTGTGGCATTTCAGTTTACAGTTACTCCTGAAGGAATTGACCTCCGTCTGAGTCATGAAGCACTAAAACAGGTCTACCTCTCAGGGTTACGTTCATGGAAGAAGAAATTTGCCCGCGTAAAGAATAGCTTTATTACTGGTGTTTACCCTGCCAGCCCATCAAGCTGGCTTTTTGTTGTTATTGCTATCATGGGGACCTTGTATGCCCGTGTTGACCCATCCATGGGAATGATAGAAAAGATTAAAGAACATCTGCCTGCAAGTAGTTATCTGTCTCATCAGGGCCAGAGCATCGTAAGTGCCCTCCTATTTTCTACAGGACTTTGGTTTGCACTTATTATGACCATGAGGTTTATTCTTAAACAACTCTTATCCTATCAT…
ENSXETG00000015442	syt4	0.16337316490365308	synaptotagmin 4 [Source:Xenbase;Acc:XB-GENE-5963049]	ATGGCTCCAATCACGAGCGGCAGAGATGCTTTTGATGAAATTCCATCAGTGGTTGGACTGGTCAGCGGGTTTGGACTTGTTTTCACGGTGTCTTTGTTCTCGTGGATTTGTTGCCAGCGTAAATCAGCCAAATCCAACACGACGCCCCCGTACAAGTTTGTCCATGTGTTAAAAGGCGTTGACATATACCCCGAGAGCTTAAACAGCAAAAAGAAATTCGGAGCAGATGAAAAAACAGAACTGGCTCCTAAATCTCTCATCTCAAAGACTTCTCTTCACCTTGATCTCGAAAAAAGGGACTTAAATGGCAATTTTCCGAAAGCCAATAAAGTCAGAAGCTCTCCAGACCTTGAGGATTTCTCGCAGCCTCAATTACCAGAAAAAGACAAAGACTCCGTT…
ENSXETG00000012024	slc15a2	0.28918725768467335	solute carrier family 15 member 2 [Source:Xenbase;Acc:XB-GENE-486968]	ATGCCCCCCTCACCCACCGACCCCTCTCTGCTCTCCCCCCCAGGAAAGAAGAGCGGACTGAGCAGTTACTTCTCAACATCTGCCTCCTCTCCGACCAAGAAAGTGCCGAAACTATGCGGAACCAACTACCCCCTGAGTATCATGTTCATCGTCGTCAACGAGTTCTGCGAGCGATTCTCCTACTATGGAATGAAAGCGGTTCTCACCTTGTATTTCCTCAATTACCTGCACTGGGATGAAAACCTGTCGACGACTGTGTATCACGCCTTCAGCGGCCTCTGCTACTTCACCCCCCTCATTGGCGCCCCCATCGCCGACGCCTGGCTTGGGAAGTTCAACACCATCTTTTACCTGTCAATCCTCTACGTCATTGGGCACGTGATAAAGTCAGTGGGTGCC…
ENSXETG00000018576	mapk1	0.37238576319582983	mitogen-activated protein kinase 1 [Source:Xenbase;Acc:XB-GENE-479467]	ATGGCAGCGGCAGGGGCCTCGTCTAACCCCGGCGGGGGGCCGGAGATGGTGCGAGGGCAGGCGTTCGACGTAGGCCCGCGATATACCAACCTGTCATATATCGGGGAGGGAGCGTACGGCATGGTTTGTTCTGCCTATGACAATGTAAACAAAGTACGAGTTGCTATCAAGAAAATCAGCCCATTTGAGCATCAGACATACTGCCAGAGAACACTGAGGGAGATCAAAATCTTGCTGCGTTTTAAGCATGAAAACATCATTGGAATTAATGACATAATTCGAGCTCCAACCATTGAGCAAATGAAAGATGTGTATATTGTGCAGGATCTCATGGAGACAGATCTCTATAAACTCCTGAAGACTCAGCATCTTAGCAATGACCACATCTGCTATTTCTTG…
ENSXETG00000033727	SLC22A2	0.13177633019426924	solute carrier family 22 (organic cation transporter), member 2 [Source:NCBI gene;Acc:100487774]	ATGGCAACTTTTGATGAACTTTTGGAACACATCGGGGAGTTTGATGCCTTTCAAAAGCAGATATTTATACTTTTGTGTTTCATATCAGTTGTGTTTTCCCCCATTTACGTGGGCATAGTTTTCCTAGGCTTTGTACCTGATTACAGGTGTGTTAGTGCTGGGATTCCGGAACCAAGCAACGAGTGTGAATGGACACTTAACTATACAGGACCAAATGGCTCTACTGATTCTTTATATATGAGTCAGTGTTATCAGTATGATGTAGACTGGAATAGCACATCTCTGAACTGCACAAATTCATCATTAAATATCACCAGCAAGCTGCCAATAACAAACTGTAAAGATGGATGGGATTATAACACCACCGGATCATCCCTTGTAACAGAGTTTAATCTTGTT…
ENSXETG00000039863	NA	0.7463227071012788	NA	ATGGGAAAGACCAAAGAGCTGTCCAAGGATGTCAGAGACAAAATTGTAGACCTGCACAAGGCTGGAATGGGCGACAAAACCATTAGCAAGAAGCTGGGAGAGAAGGTGACAACTGTTGGTGCGATTGTTCGAAAATGGAAGGAGCACAAAATGACCATCAATCGACCTCGCTCTGGGGCTCCACGCAAGATCTCACCTCGTGGGGTGTCAATGATTCTGAGAAAGGTGAAAAAGCATCCTAGAACTACACGGGAGGAGTTAGTTAATGACCTCAAATTAGCAGGGACCACAGTCACCAAGAAAACCATTGGAAACACATTACACCGCAATGGATTAAAATCCTGCAGGGCTCGCAAGGTCCCCCTGCTCAAGAAGGCACATGTGCAGGCCCGTCTGAAG…
ENSXETG00000012585	bmf	-0.15840881215023467	SMAD specific E3 ubiquitin protein ligase 2 [Source:NCBI gene;Acc:100038194]	ATGTCTAACCAGGGATCCCGGCGGAACGGGCCGGTGAAGCTGCGACTGACCGTGCTGTGCGCTAAAAATCTGGTGAAAAAGGATTTCTTCACAGGACTCCCGGATCCCTTTGCCAAGGTGGTTGTGGATGGCTCGGGGCAGTGCCACTCTACCGACACCGTCAAGAACACACTGGACCCAAAATGGAACCAGCATTATGACCTCTACATTGGCAAATCTGACTCCATTACCATCAGTGTCTGGAACCACAAGAAGATCCACAAAAAGCAGGGTGCTGGCTTCCTGGGCTGCGTACGGCTTCTCTCCAATGCAATTAATCGGCTGAAGGACACTGGCTACCAGAGACTCGACCTATGCAAGCTCGGTCCCAATGACAATGACACTGTGCGAGGGCAGATT…
ENSXETG00000024161	lmna	-0.09933169105818751	lamin A/C [Source:Xenbase;Acc:XB-GENE-920722]	ATGTTTCTCCAATCTAGGAACGCCAAGAAGGAGAGCGATCTGCTGACGGCGCAGGCGCGGCTGAAGGATTTGGAGGCCCTGCTGAACTCTAAAGATGCCGCCCTCACCACGGCGCTGGGAGAGAAGAGGAATCTGGAGAACGAGATCAGGGAACTTAAGGCTCACATTGCAAAGTTGGAGGCCAGCCTCGCCGACACAAAGAAACAACTGCAGGACGAGATGCTCCGCCGCGTGGATACCGAGAACCGCAACCAGACGCTGAAGGAGGAGCTTGAGTTCCAGAAGAACATTTCTAACGAGGAGATGCGCGAGACCAAGCGCCGCCACGAGACCCGGATGGTGGAGATGGACAACGGGCGGCAGAGGGAGTTTGAGTCCAAACTGGCAGACGCCCTGCAG…
ENSXETG00000016436	b3gnt3.2	0.05190876165303612	UDP-GlcNAc:betaGal beta-1,3-N-acetylglucosaminyltransferase 3, gene 2 [Source:Xenbase;Acc:XB-GENE-996589]	ATGCTGCTGCAGGAAATTTGTGTCAATATGAGGAGGAAATTTTTTAAAACCGAGATCTTTGTCTTGCTTGCTGTGGGAATCCCATCCCTTCTTTTTATCCTGTGGGAAGATCAAAATAATCAACTAGTGTTAGAAGAAATCGAGGAACCTTCACCTGAACGTCTTGCAGACAATAATACCATCGACTCCCCTGCTGTAAAAATTGAGTGGAAATCCAGTTGTAAGGCAAATTATTCTGTTGAAAATATTAGTGGGTTTTCTGATTTGCCACCTCATATTAAAGACTTCTTAATATACAGGCATTGCAGAAGTTTTCCTATAATTATTGATGCTCCCAGTAAGTGTGGTGGCCCATCTGCATCCAAAGGAGTTTTCTTGCTACTTGCAATTAAATCTTCC…
ENSXETG00000020484	mob2.2	0.0016006555269719447	zinc finger FYVE-type containing 28 [Source:NCBI gene;Acc:779953]	ATGTATGGGGTAACACAAGGAAAGCTGCTATGGGTTACTAGACCTGGTAGGTCTGACCCGCAGCTTCTTGCACAATTCTACTATGCAGACGAAGAACTTAACCAAGTGGCTGCTGAGTTGGACAGCTTGGATGGAAGGAAGGACCCCCAGAGGTGTACACTTCTAGTCAACCAGTTCCGATCGTGCCAGGACAATGTTTTAAATATCATAAACCAGATAATGGAGGAATGTATTGCGCATGAGCGAGCAAACAGGGATTTCTGTGTGAAGTTTCCAGAAGAAATTCGGCACGATAACCTGGCGGGACAGCTCTGGTTTGGAGCCGAGTGTTTGGCTGCCGGCTCCATCATAATGAATCGTGAAATAGAGAGTATGGCTATGAGACCTCTAGCCAAAGAC…
ENSXETG00000038097	rflcii	-0.6428479117208412	relaxin family locus C type II [Source:NCBI gene;Acc:100145369]	ATGGCTTTCCGCCTCTACCACTTAGCTCTTATAATTACTCTTCTAATGCCCAATTGGTGCTTGTGTTCAGCAAGCAATGAGTTGGGGATTAAGCTGTGCGGACGAGAATTCATCCGGACTGTGGTGATGTCCTGCGGGGGTTCAAGGTGGAAGAGGTACTCACCAGAGCCAGGACAGGAGAGAGTTAATCCCTACAGAGACTTCATTGACTGGCTGAACCGAGACTTCCTTGACAACCCAGAAAGCTTTAACTCCTTGTACAACGAAGGGCATAGTGCGCGGAATGTTCTCTCTCCTGTCCGGCAGCAGCAAGATACCACCATGGAGCAGTTGCAGGGGCCCTTATATGATTCATTAGTAGGTCAAGAACCACGGAGCACCAGCCTACGGATGAGGAGG…
ENSXETG00000038798	med25	-0.35198234962266634	NA	ATGGAACCGCAGCTCTCTCTCCCAACCAATCAAGCTTCTACCCAGAACGAGAGTGGCTCTGTCTTGGTGGCTCAACCCGACTCACCTGGAGAAGGGCCGTTCCCTACAGGAACCACAGTGGCTCATCCTAACCACGGACGCCAGCCTCAAAGGCTGGGGCGCAGTCCTGGGACAGCTCTCAGCTCAGGGAACCTGGGCAGCAGCAGAATCCCAACTTCCAATCAACATATTAGAAATCAGAGCGGTACGACTAGCCTTATGCCACTGGCAGAACCGACTCACAGGACGCGACATCAAGATCCAATCGGACAACGCAACCACGGTTGCATACCTGAACCACCAGGGGGGCACAAGAAGCCGACAAGCCCTCAAGGAAGTCAGTCGCATTCTAACATGGGC…
ENSXETG00000012201	pxn	-0.1335141801626673	paxillin [Source:Xenbase;Acc:XB-GENE-941407]	ATGGATGACCTGGATGCATTGCTGGCTGACCTGGAATCTACCACCTCCCATATATCCAAACGTCCAGTATTTTTGGCAGAAGAAACGCCATATTCATTTCCAAGTGGATGTCATACATATCAAGAGATTACGATACCTGCTACATCAACAACAAAAGCTCTCAATGGGACTTTACCAGATTCACTAGATTCTTGGACAAGCAACACTCCCATCCAGCAGGAGAACCCTTTGTACTGCTCTTCTGGTGCCAAGGAGGTTTCGGGCTCACCAAGTTTTGGTGAAGAAGAACATGTGTACAGTTTTCCCAATAAACAGAGATCTGCAGAGCCATCTCCTACTGTTATGAGCTCATCATTGGGCAGCAATTTGTCTGAACTGGACCGTCTTCTCTTGGAACTA…
ENSXETG00000030684	gemin2	0.31708622212258686	uncharacterized XB5894820 [Source:NCBI gene;Acc:100135146]	ATGAAGAACCTGGTGGCCCTGTTACTGCTGAGCCTGCTGTATCTGCATGGCACTACATCACTGGCTGAAGACATTAACTCAGATGCAGAAACGCTACCTGCATTTTGTACCAGTTATAAGTGTCCAAGGTATCAACTAATCAAAAAATATGAGAAATTTGAACATAGAATTTATAATGCAACTAACTGGGTCACCACATCTCTAAAGCTGGACTTCCTTGGCATTGGACTAGCTAAAAGCTTCAAACGCCTGCTGGATTATATCAATGGGAAAAATTCTGAAGGTCTAGTGATGAAGATGACTGTCCCAGTCCGTATAAAGGTTCCACGGAGCGATATTTTATCTACTAACGCTACTATGTCATTCTTTGTGCCACCAGCTGTGGACACTCTGCCCACT…
ENSXETG00000001594	kpna2	0.43948667720568	karyopherin alpha-2 subunit like [Source:Xenbase;Acc:XB-GENE-979796]	ATGGGGCAGTGGCACTCATTGCCGTGGGTATGGGCCTTCGGCTCACTCTGGCGCTTCTTTCCATGGCAGGAAATGAGGAGGAGGAGGATCGAAGTGAACGTGGAGCTGCGCAAGGCCAAGAAAGATGATCAAATGCTAAAGAGGAGAAATGTCAGCACCTTCCCAGATGAGCCAACCTCTCCCCTACAGGAGAAGAACCAGAATGGGCAGACCTCTACACAGTGGAGTGTTGAGGAGATTGTCCGGGGTGTCGCCAGCTCCAGCCTAGAAATACAGCTACAGGCCACACAGGCTGCGAGGAAACTTTTGTCCAGAGAGCGAGAGCCGCCAATCGATCGCATCATTCAGGCGGGTCTCATTCCCAAGCTGGTAGCGTTTCTGGCCCGCACCGACTGCAGC…
ENSXETG00000040774	NA	0.09903190786505464	NA	ATGGTTGATATAACTGCTCTCTCTAACTCTCTTAGTTCTAGCCTCTCCTCCTCCTGTGCTTCCTCTGATCCTGAGTTACTGGTAAATACCTACAACTCCTCAATTTTATCATCTGCAATTAACACCCATGCCCCCCTGCAGCCCGAACGCAGTCGTGCCCGCAATCCCTGTCCCTGGCTTAACCCTCAGACGCAATTTCTGCGCTCCTGTGCACGATCTGCTGAGCGCATTTGGAGGAAATCACGCGTTAAAGCTGACTTCCTCCACTATAAATTTGTTATGGTGTGCCTCAATACTGCCCTATCCCAGGCCAAGCAAGCATACTATAACACACTTATAAATAATAATAAATCAAACCCGTGGCGCTTATTCTCCATATTTAACTCGCTACTTCATCCC…
ENSXETG00000022667	fam83g	0.03467346389373946	family with sequence similarity 83 member G [Source:Xenbase;Acc:XB-GENE-6258742]	ATGGCGCTGTCACAGCTCCAATGCCTGGACAATAACCATGTGAACTGGAGGGCCAGCGAGAGCAAAGCCGAGTTCTTCTACAGCGAGGAGCAGAGGCTGGCCCTGGAGGCGCTGCTGGCCCGGGGGACCGACGCTTTCTATGGGGTCGTCAAGCAGGAGAACATCAGGGACTTCCTCTCCGAGCTGGAGCTGAGCAGGATCGCCGGCCGGCTGGAGCCCTTTGACCCCGACTCTGGCCACTGCAGGGCGGCCGGGGAGGATGGCGAGCTGGATAGTGGGGAGGAAGAGGAGGATGGGGGGCAGTCGCTGGAGTACTGGCCCGAAAGATCGGACTGTTCCATTCCAGAGCTGGACTTGGGCTGGCCCGAAGCTGTAGCCTATCGGGGGGTGACCAGGGCC…
ENSXETG00000003349	poc5	-0.04296463276481957	POC5 centriolar protein [Source:Xenbase;Acc:XB-GENE-5850620]	ATGGCCTGCAAAAAATTTATTCACATGAGCAAAAAGAAAGTTATGAAGTGTGATGTTTCCATGCAGATGTCTTCTGATGAGGAGTATCGTGAAAGTCCCATTTTGCCAAAAGATTCAGACCATGGCAGTTCAGTGTCCTCAGATCTTCAGGATGAATATGATGAGCTTCTCCGCTATGCAGTTGTAACCCCAAGGTTTGGCCCTCATTTCCTTGGGCAGAATCAGCTCATCACTGAACAAACTAGAATTGACAAGGTTTCAAGCCCAAAGGATCCAGTGCAAGATCAATCTCCAGCAAGAAATAACTCAGAGGAAAATATTCCAGACTGTTCAGCAGTGAGCACTTCTCAGCGCAGGTCTCCATCAACAGCAAACGAGGAAGAAAGGGTCATGTCGGAA…
ENSXETG00000004971	cobl	0.14145963888976584	cordon-bleu WH2 repeat protein [Source:Xenbase;Acc:XB-GENE-490658]	ATGGAGACTGCACTTAAACCACCTACTGGAAAAAAGCTAAAGGCAAGAGCGCCTCCTCCTCCAAATCAAACTTCTCTGCCAACACCATCAATAGAACAGAGATCATCCTTAGATTTTGATGAGACAGACAGCCAGAGCCCTGAAGATTTAAAGGAGAACATGCTGCACAGGAAAATGGACCTCAGAATATATTTACCTGATGGTCGAGGAAAAACAGTCACTGTGGATGGAAGTAAAGCAGTGATGGACCTGCTGGTGGATTTATGCAGTCAGTACCATTTGAATCCTGCTCAGCATATCATTGAGGCAAAATCTGGCGAGTCCCAGCAACCGTTCACTTTGAGGCCAAATACTCTCATTGGAACACTGGATGTTCAAACAGTATGTCTGAAGGAGAAA…
ENSXETG00000022549	brf1	0.19416348377692247	BRF1, RNA polymerase III transcription initiation factor 90 kDa subunit [Source:Xenbase;Acc:XB-GENE-946065]	ATGAGCAGCCGGGTGTGTAAGAACTGCGGTTGTACCGATATAGACGTAGATGCGGCCCGCGGGGATGCGGTGTGTACGGGCTGCGGCTCGGTGCTGGAGGATAATATCATCGTGTCTGAGGTGCAGTTCGTGGAGGGCGCAGGCGGGATCTCCTCGGCAGTTGGACAGTTCGTCTCCTCGGAATGTTCTGGTAAAACTCCATCACTGGGAGAAGGATTTTACACCAGCGTGGGAAAGGAGTCCCGTGCACAAACTCTACAGAATGGGAAGCGTCAGATTCACAACTTGGGAGTGCAGTTACAGCTAAATAAGCATTGCCTGGACACTGCCTTCAACTTCTTTAAAATGGCTGTCAGCAAGCACCTTACCCGTGGTAGGAAGATGACCCATGTCATAGCC…
ENSXETG00000014775	lacc1	0.025403207807888822	laccase (multicopper oxidoreductase) domain containing 1 [Source:Xenbase;Acc:XB-GENE-989463]	ATGTGCACAGAAGAAGTTGTACTTGTTGACTTGTTTGATCCAGGGTATCTCTTATACAACAATAACTATACAGAGCCTATTGAACATGTTTTGGACATATCTAAAAAATATTACAGCCGAAATCTCCCATTTACTTATATAATGTGCTTTTGTGATTCATCTTGCTCACCTGAAGCTCAAGAACTTTTCCATGGCGCTTCTATCCAGTATCTGGAGGGTTTAAGAAATGGATCTAAAATTGTGAGTGACTCCAGTATGGCTGCTATTCTGTACTCCATCAAACAAGATATAGATGCTTTAAACTTGAGTAAAATTCTTGTTATCATGCCCAAGAACAGAAGAGCACAAATGGACATATTTGTAGATTATTTGTTTACTGACCTATACAAGTTTACCTTT…
ENSXETG00000000784	hebp2	0.25853321783517147	heme binding protein 2 [Source:Xenbase;Acc:XB-GENE-489461]	ATGTATCAGAGCACTTGGCTGCGCTTGCTGCTCACTGACAACCTCTGTGTCCTGCATTTTATCATGAACAATATGGGTCCCCTGCTGCTGCTGAGCCTGCTCTCTCTCTGGGGCACTGCAGTGAGGGCTGAAGATGGGGCATCTACTGATGGCAAGTCTCCTGCATTCTGTGGTGAACGAGAATGTCCCAAATTTCAACTGATACAGCAATACGATTCTTTTGAGCTCCGAGCTTATGAAGGAAGCCAGTGGGTCACAACAGAGCTGGATGATGGTTTCCTTGGCTTTGGAATGGTCACAAGCTTCAGGCGCTTATTTAATTATATCTCTGGCAAGAATTCCCAAGAAAAAAAGATTGAAATGACGGTGCCAGTACTCATACAGTACCCATTAAAAGAT…
ENSXETG00000023113	scyl1	0.4892138893495357	SCY1-like, kinase-like 1 [Source:Xenbase;Acc:XB-GENE-5843537]	ATGTGGTTCTGGTCTCGGGATCCGGCCCGTGATTTTCCCTATGACGTCACCGGGGAGCGGGAAGAGTTACCGGCAGGATGGGGGGTGCAGAAGGGCAAAAAGAAGACTGGCGGAGATGCCGTGTCAGTATTCACGTACGAGATCCGGCCTGGGGCTGAAGAGCAAACACAAGCCGCCAAAACAGCCTTAAAAAGGATCAAAACCCTGAAACACCCCAATATTTTATCATACGTAGATGGACTGGAGACCGACAAATGCCTGTACATTGTGACAGAGCCTGTTACACCGCTGGGGACATATGTGAAACTGAGAACGGACAGTGGAGGAGTCAGTGAACTTGAGATATCGTGGGGGCTCCATCAGATTGTGAAAGCTCTGAGTTTCCTGGTGAATGACGGT…
ENSXETG00000041151	psph	-0.015703873907463667	phosphoserine phosphatase [Source:NCBI gene;Acc:549747]	ATGTCCGCAAACTTCAGTTTGTGCAAGAAAATTCCACTCAGAATGGGCTCCCTCTCTGAGATTAAGGAAACATTCCGGAGTGCAGATGCAGTTTGCTTTGATGTGGACAGCACAGTGATAAAAGAGGAGGGCATCGACGAGCTAGCAAAGTTCTGCGGTGTTGGTGATGCAGTGGCAGAGATGACACGCAGAGCGATGGGGGGATCTCTAACCTTCAGGGCAGCTCTAACAGAGAGACTTGCATTAATCCGGCCTTCAAGAGAACAGGTGCAAGCCCTGATCACAGAACACCCTCCAAGGCTCACCGAGGGGATAAAGGAACTGGTCTGCAGGCTGCACCAAAGAAATGTCCAGGTCTTCCTCATATCTGGTGGATTTCGAAGCATTGTGGAGCATGTA…
ENSXETG00000039530	wdr47	-0.15261068218393475	enoyl-CoA hydratase domain containing 3 [Source:NCBI gene;Acc:100490288]	ATGTCGTGGCTGTGGTTCTGTGGCGAGCGGGCAGCAGCTCCAGCAGTGAGAGGCATATGCAGCAGTTTCGCTGGGCTAAGCAGACATGTCAGTAGCTCAACGCACTTACAACACCCTCCCCTTACTGTCCTCCAGCAGGAGCATGGGATAAGGAGGATCATATTAAATAATCCTCAGCAAAGAAATGCACTTTCTCTCCCTATGCTTCAGTCCCTTCAGAATGACATCCTTCATGAAGCTGATGATGTGAATCTAAGGGCTATTATCATATCAGCTGAAGGACCTGTATTTTCATCTGGCCACAACCTTAAAGAATTGACAGCTGAATATGGCCAAGGTTATCATATGGAAGTATTTAACACCTGTGCCAAGCTTATGACCTTATTTCAGACTCTTCCA…
ENSXETG00000022668	grap	-0.048721906115324704	Xenopus tropicalis GRB2 related adaptor protein (grap), mRNA. [Source:RefSeq mRNA;Acc:NM_001345939]	ATGGAGGCAACGGCAATATACAACTTTAAGACTACAGAAAGGGATGAACTGCCATTTAAAAAAGGGGATATAATAAAGATACTCAACATGGAAGATGACCAAAACTGGTTTAAAGCAGAACTTTTTGGAAGAGAGGGCTATATCCCAAAGAACTACATCAAAGTGAAACCCCATCCGTGGTACGCGGGCAGGATCTCCCGGCAAGTGGCAGAGGAGATACTGCTGAAACGGAACTTTGTAGGAGCCTTTTTGATCAGGGACAGTGAGAGTTCCCCAGGAGACTTCTCCATCTCTGTCAACTATGGGCACCACGTGCAACATTTCAAGGTCCTGAGAGACACTGAGAGCAACGGGAAATACTACCTGTGGGAGGCCAAATTCAACTCCTTGAACGAGCTG…
ENSXETG00000025658	mrpl13	0.028038665295676196	mitochondrial ribosomal protein L13 [Source:Xenbase;Acc:XB-GENE-1016174]	ATGGCGAGTTACAGCCGGAGCGCTCAGCAATGGGCTACCTTTTCCAGAATGTGGTACCTAATTGATGCCAGAATGCAGCCTCCTGGGAAGGTCGCCTCACTGTGTGCTGTGCACCTCAAGGGGAAACACAAGCCCATGTACCATGCCCTGAGTGACTGCGGGGACCATGTGGTGGTGGTGAATACCAGGCATATTGCTTTCTCTGGCAATAAATGGGAGCAGAAAGTGTACTCTTCTCACTCAGGTTATGCCGGAGGGTTTCAGCAAGTGACGGCAGCGCAGCTTCACCAGAGGGACCCCACAGCCATTATGAAACTTGCTGTATACGGAATGTTACCCAAAAACCTCCACAGAAGGACAATGATGCAGAGATTGCACCTCTTCCCAGAAGATGACATT…
ENSXETG00000038969	serp2	-0.21070787976386657	stress-associated endoplasmic reticulum protein family member 2 [Source:NCBI gene;Acc:779835]	ATGGTGGCGAAGCAGAGGATTCGGATGGCTAACGAAAAGCATAGCAAAAACATCACCCAAAGAGGCAACGTAGCCAAAACCTTGAGGCCACAAGAAGAGAAATATCCTGTAGGACCTTGGCTTCTGGCACTGTTTGTTTTTGTTGTCTGTGGATCAGGTATGAACAAAGAACAAAGTCTGGACTTGAGTATGTGCTGTAAATGA
ENSXETG00000040685	nr5a2	-0.20300855895046993	NA	ATGATTGGGTATAAAAAGAGCTTCTTAGAGTTGCAGTGTCTCTCAGAAGCCAAGATGGGTAGAGGATCACCAATTCCCACAATGTTGCGCAGAAAGATAGTGGAGCAATATCAGAAAGGTGTTACCCAGCGAAAAATTGCAAAGATTTTGCATCTATCATCATCAACTGTGCATAACATCATCCGAAGATTCAGAGAATCTGGAACAATCTCTGTGCGTAAGGGTCAAGGCCGTAAAACCATACTGGATGCCCGTGATCTCCGGGCCCTTAAACGACACTGCACCACAAACAGGAATGCTACTGTAAAGGAAATCACAGAATGGGCTCAGGAATACTTCCAGAAACCATTGTCAGTGAACACAATCCACCGTGCCATCCGCCGTTGCCAGCTGAAACTC…
ENSXETG00000022670	syngr3	-0.5320811024516637	synaptogyrin 3 [Source:Xenbase;Acc:XB-GENE-949635]	ATGGAAGGAGCCTCATTTGGTGCTGGCCGGGCAGGTGGAGGATTCGAGCCAGTGGAATTCCTGAAGCAGCCCCAGACCATCCTGAGAATCATATCCTGGGTGTTCTCCATTGTGGTTTTCGGTTCGTTAGTGAACGAGGGATCAATTAACGTCGACAGCCCCGAGCTTTATTGCGTTTATAACCAAAACGACGATGCCTGTAACTACGCCATCACCATCGGAGTCGTCGCTTTCTTCGCCTCCATCTGCTTCTTCGTCGTGGATATCTACTTCCCACAGATCAGCAGCGTGAAGGATCGGAAGAAAGCCGTGATGATCGATATTGGCTTCTCAGCGATATGGAGCTTCCTGTGGTTTGTGTCGTTCTGTTTCCTGGCTGACCAATGGCGAAAGACGTCT…
ENSXETG00000032144	ptprc	0.6571621584533811	ankyrin repeat and death domain containing 1B [Source:NCBI gene;Acc:100145596]	ATGAAAATGGTTATGAGAAAAAAAGCAACAGCCCAGCAAGAACAGTGGGCATCAGAAACAGGGGAGGAAGAACCAAGCAAGCAGAACCATGCTCAGAAGGTGCTGAATACGGTGACTGGGCTCGTACAGTCTGTACGCAATAGAAATGTCACTGAAAATGACTCAGGAGACCACCATGAAATATTGCTGCATAAAGAAATGGCCTTTCATGACGCTGCTAAAAAGGATGATGTGCTAGCCATGACTCGGCTGCTGGAACAAAAAGCTAACATTAATGCCAAGAATAATCTCAACAGGACAGCGCTTCACTTTGCTGTAGCTGCAAATAAAATGCAGGCCGTGTCCTTCCTCCTGAGCCACAAAGCACGAGTAGATATTGCTGATAAGCATGGCCTGACT…
ENSXETG00000036633	thap2	-0.07512721655230747	THAP domain containing, apoptosis associated protein 2 [Source:NCBI gene;Acc:100380030]	ATGCCTACCACGTGCGCAGCTTCTGAATGCAAAAATAATTCCAAAAAGGACAGCCAGGTCACTTTTCACAGATTCCCAGCAGACCCAAAACGGAGAGCAGAATGGTTGAAACATCTTAACAGAGAGAACTTCTTTCCCACATTGCACACCTTCTTATGCTCAAAACATTTTGAAGAGTCTTGTTTTGACCGAACAGGACAGACTGTGCGTTTGAGGGCAAATGCTGTGCCAACAATATTTATCTATCCCGAACACATGAAGGAGAAGATTTCTTGCCTGAAGGTGACTAGCATTGCAAAGCCAGAAGAACATCTGCCACAGCCCAGAGCAATCTCCCAGAAGCAAACAGATTCCTTCCCAGATCACAATTATTGCCTTCCAAGTCCTGCAGCAATTAAA…
ENSXETG00000022671	znf598	0.01453631639790362	zinc finger protein 598 [Source:Xenbase;Acc:XB-GENE-999290]	ATGGCTTCCAAGGTGGGGAAAACCGTGGACTTGGAGCGAAGTTGTGTGCTCTGCTGTCAAGACCTGGACATTTATGCCGTGGGAAAATGTGATCACCCAATCTGCTACCGCTGTTCGACTAAAATGCGGGTCCTGTGCGAGCAGAAGTACTGCGCTGTGTGCAGGGAAGAACTCGATAAGGTGGTGTTTGTGAATAAGCTGGCTCCTTTTACAAGCCTCCCTTTGCAGCAGTTGCAATACGAGAAGAAATACGACATTTACTTTGAGGATGGAAAGCTGTTTTCTCAGTTTAGGAAGCTCCTGCAGCACGAATGCACTCTGTGCCCCTCCATGCGACCCTTTCATGCATTTGCTGACCTGGAGCAGCACATGCGGAAAAACCATGAACTGTTCTGCTGC…
ENSXETG00000024940	ypel1	0.3150274435843069	yippee like 1 [Source:Xenbase;Acc:XB-GENE-998682]	ATGGTGAAGATGACAAAATCAAAAACTTTCCAGGCCTACCTGCCAAATTGCCACAGAACTTACAGTTGTATTCACTGTAGGGCACATTTAGCTAACCATGACGAGCTGATATCCAAGTCATTTCAGGGAAGTCAAGGGAGAGCCTACCTCTTTAATTCAGTGGTGAATGTGGGATGTGGTCCAGCAGAAGAGAGGGTTCTTCTAACAGGACTGCACGCAGTGGCTGATATATACTGTGAGAACTGTAAAACTACCCTCGGCTGGAAATATGAGCATGCCTTTGAAAGCAGTCAGAAATACAAGGAAGGCAAATTTATCATTGAACTGGCTCACATGATAAAAGACAATGGCTGGGAGTAA
ENSXETG00000009385	plaa	0.30117112103814725	phospholipase A2-activating protein [Source:Xenbase;Acc:XB-GENE-1011438]	ATGTCTCAGGCAGGAAGAGATGGCGGTGACAACTGTTACCGGCTGCGCTGCTCCCTCCTGGGGCACGAATTGGATGTGCGGGGAGTGGCGCGCTGCCCCCTTTGGCCGGGCGAGGGGTTCGTGTCCGTGTCACGTGACAGGAGCGCACGCCTCTGGGTACCAGACAGTCCTAACCAAGAATTTGTGGAATTGCAACGTATGAGTGGCCACTCCAACTTTGTGTCCTCTGTATGTATTTTACCTCCAAGTGACCTATACCCCAGAGGATTGATTGCCACTGGAGGGAATGACCATAACATATGTGTGTTCAGCTTGGACAGTGCAAAGCCTTTATATACACTAAAAGGTCACAAGAATACTGTGTGCAGTCTTTCTTCTGGAAAATTTGGTACCCTGCTA…
ENSXETG00000021513	reep5	0.20128578840915487	receptor accessory protein 5 [Source:Xenbase;Acc:XB-GENE-944534]	ATGGCTGCGGCACTGAAAGACAGCTTCGAGAAATTCCTTCATCAGAAGAACGTATGCACTGACGTCTTGGAGAAGATTGAAGCCAAGACTGGGGTGAACAGGCGTTACATAGCCCTAGCAATCATCGGTATTGTGGCAATTTACCTTGTGATCGGATATGGTGCCTCCCTGCTCTGCAACCTGATTGGATTTGCCTATCCTGCATATGTTTCAATCAAAGCCATTGAGAGCGCCACTAAAGATGACGACACACAGTGGCTGACCTACTGGGTTGTGTATGGAATCTTCAGCATCATTGAATTCTTTGCGGACATATTCCTGTCTTGGTTCCCTTTCTACTACATGATCAAGTGTGGATTTCTGCTGTGGTGCATGTCTCCCAGTCCCTCCAACGGCGCC…
ENSXETG00000001609	smchd1	0.6068730539080289	structural maintenance of chromosomes flexible hinge domain containing 1 [Source:Xenbase;Acc:XB-GENE-968672]	ATGGAGCGTGGCCGTCAGGGCCCTGACAGCGGCGCAGGCAGCTACAAAGGCCGCATGGTGACCCTGTTTGATAGGCGCCTGGAGCAAACACAGTGCTGCGAAGAGAAAACACTCAGCGTGTATGGCGGCGGCTACGCGGAATTCCGTGCGGATATGTGCCAGGCTTTTGGCATTGACCCAGAAGACCAATTTGTTATAACCACTACAGACAGGAAACAAGTCACCCATACAAACTTTGATCTAATTGTTCAAGATGGTATCACTTTATATCTTCTTCAGTCACCAAACCAGTCTCTATTTTCTCCAACCAAAGAAAAAATTGACTTTTTGCCACATTATGATACTTTGGTCAAAAGTGGGATGTATGATTATTATGCTAGTGAAGGGCAAAATCCACTA…
ENSXETG00000004976	dclk3	0.11433954988165271	doublecortin like kinase 3 [Source:Xenbase;Acc:XB-GENE-983282]	ATGGGCCCGAGACCATTTGCCAAGCCATTCTTGGGAATAAACAATTACACGTCTCCCTATCTTCACTCACAAAATGGTTTTCACACAATTCATTCTGAAAACAGCCCTGTAAAACCAAGAATTGTTACCGTAGTAAAGCCAGGAAGCCATCCTTTGAAAAAGATCACATTACTTCTAAACAAGAGGTCTGTCCAGACTTTTGAACAACTGGTTGCTGATATATCAGAAGCACTTGGTTTTCCGAGGTGGAAAAATGACAGAGTGAGGAAACTTTATAACCTCAGAGGCAAGGAGATACGAAGTATATCTGATTTCTTTCGTGGGGATGACATTTTTATAGCATTAGGAAGAGAAAAGCTGACAACAAAGTGTACTGAATCTGTTTTTAATGAACTTTAC…
ENSXETG00000000991	numb	0.17977776453239755	numb homolog [Source:Xenbase;Acc:XB-GENE-854791]	ATGAACAAACTGCGTCAGAGTTTTCGGCGGAAGAAAGATATCTATGTCCCAGAGGCAAGCCGACCCCACCAGTGGCAAACTGACGAAGAATCGGTCAGGAATGGGAAATGTAGCTTTCAAGTTAAGTATCTCGGCCATGTGGAAGTAGAGGAATCAAGAGGGATGCACATCTGCGAAGAAGCAGTGAAAAGATTAAAATCTGAAAGGAAGTACTTCAAAGGCTTCTTTGCAAAAAGCGGCAAGAAAGCAATCAAGGCCGTCCTGTGGGTTTCAGCTGATGGACTTCGAGTTGTGGATGAAAAGACAAAGGATCTTCTGGTTGACCAGACTATTGAGAAAGTCTCCTTCTGTGCTCCAGATAGAAATTTTGACAGAGCCTTTTCTTATATCTGTCGTGAT…
ENSXETG00000000783	sec23b	0.11014482263007483	Sec23 homolog B, COPII coat complex component [Source:Xenbase;Acc:XB-GENE-974663]	ATGGCAACCTACTTAGAGTTTATTCAACAAAATGAGGAGCGGGATGGCGTTCGCTTCAGCTGGAATGTGTGGCCCTCCAGCCGACTGGAAGCCACACGGATGGTTGTACCTTTGGGCTGCCTTTTTACTCCTCTGAAGGAACGTCCAGATCTCCCACCAGTTCAATATGAGCCAGTGCTTTGCACAAGGCCAACCTGCAAGGCAGTACTTAATCCACTTTGTCAGGTGGACTACAGAGCTAAACTGTGGGCATGTAATTTCTGCTTCCAAAGAAACCAGTTCCCTCCAACATATGCAGGGATATCAGAAGTAAATCAACCTGCGGAATTAATGCCACAGTTTTCCACAATTGAATACATAGTGCAGCGAGGTCCTCAGACACCACTGGTATTCTTATAT…
ENSXETG00000015460	fes	0.06796553162215932	FES proto-oncogene, tyrosine kinase [Source:Xenbase;Acc:XB-GENE-6067138]	ATGGGGTTTGCGGAAGAGTTACAGTGCCCCAATGGACACGGCGCCTTGTTGCGTTTACAAGACGTTGAACTGAGATTAATGGAGACCATGAAAAAATGTTTTTTACAGCGTGCAAAGAGTGACAAAGAGTATTCAAATATGCTTCACCACATGTCTGTGCAAGTTGACAAGCTGGATCACTCGCCAACCCCTGGATTATCTGAATACACAAGCCAGCTTAATGAGTCCTGGGCAACATTGGTGTCTCAGACGGAGAACCTAAGCCAGATCTTACGGAAACATTCCGAGGATTTAAATTCAGGACCCCTGAACAAATTAACCATTCTCATTCGGGAAAAGCAGCAGCTAAAAAAGTCTTATAGTGAGCAATGGCAACTTCTCAACCAGGATTACATCAAG…
ENSXETG00000031425	NA	-0.37576945574209025	BCLAF1 and THRAP3 family member 3 [Source:NCBI gene;Acc:100490423]	ATGGCGAAATCACGGTCAAGATCACCTAGTTGGAAACACAGGCAACCAGCTTATAGAAGTCCTGAAAACCATAGGCAAAAGCACTTTCAGGATGATTATACTCAAGACAATGGATTTAGAAGAAATTCTAGGAGACCCATACACTGGGAAGAAGGAAGACACAGGCAGAACAACACAAGGACACCAAATTATAATAGGTTTAATGATAATCTTTATGATAAACCTTATGAGCAGAATTCCTTCCCTACAAATGCAAGAAAATCGCCTGGGGAAAAATTTGATCGAGACAAAGGGATATACTCTCCAGAGAGGCACAGAGATAACAATAAATCTCCTGTAGAAAAGTTTGATCGAGAAAAAAAGATATACTCCCCAGAGAGGCACAGGCATAATAATAAA…
ENSXETG00000010077	cct6a	0.5776782118048669	chaperonin containing TCP1 subunit 6A [Source:Xenbase;Acc:XB-GENE-987462]	ATGGCCGCAGTCAAAGCCCTCAATCCGAAAGCCGAGGTAGCCCGAGCCCAGGCGGCCCTGGCTGTGAACATCAGTGCGGCAAGGGGGCTCCAGGACGTGCTCCGGACCAACCTCGGGCCTAAAGGCACCATGAAAATGCTTGTTTCTGGTGCTGGAGACATCAAGCTTACCAAAGATGGCAATGTCTTGCTTCATGAAATGCAAATTCAACATCCAACAGCCTCGCTGATTGCTAAAGTAGCCACAGCACAAGATGACATTACTGGAGATGGAACCACATCAAATGTTCTGATCATTGGAGAGCTGCTGAAGCAAGCAGATCTCTACATCTCAGAGGGTCTGCACCCCAGAATAGTGACTGAAGGTTTTGAAGCAGCAAAGGTCAAAGCACTTGAAGTT…
ENSXETG00000001892	cdk17	0.00909639161912476	cyclin-dependent kinase 17 [Source:Xenbase;Acc:XB-GENE-920552]	ATGAAAAAATTCAAGCGAAGGCTTTCACTCACATTGAGAGGCAGCCAGACAATTGACGAATCGCTCTCAGAGCTGGCAGAACAAATGACCATTGAAGAAAATAGCAGTAAAGATAACGGATCCTTCAAGAAGCCTCCGCTGAGAAGACCCCATAGTGTAATAGGTGGAAGCCTCGGTTCGTTCATGGCCATGCCAAGGAATGGGAGCAGACTAGATATAGTACATGAAAACCTAAAGATGGGATCAGATGGTGAAAGTGACCAAGCATCTGGGACATCATCAGATGAAGTTCAGTCACCAACAGGAGTGTGCCTCAGAAATCGAATACACAGGCGCATTTCAATGGAGGACCTGAACAAGAGGCTGTCACTTCCAGCTGATATTAGGATACCTGATGGA…
ENSXETG00000011993	srp19	0.20123030697484587	signal recognition particle 19kDa [Source:Xenbase;Acc:XB-GENE-5919686]	ATGGCGAACTTGGAGAAATCCCATGCAAGTGTTGACAGGTTCATCTGCATTTATCCAGCTTACTTAAACAGTAAGAAAACTATTGCTGAGGGAAGGCGCATTCCCATAGAAAAGGCTGTGCAGAACCCGACATGTTCTGAGATTGCAGATATCTGTCGTGCCAACAAGCTGAATGCAGTTGTGGAGGGGGATAAAATGTACACTCGGGAGTGGAACAGAGATACACAATTTAGGGGCAGAGTGCGGGTGCAGCTTAGGAACGAAGATGGAAGCAGTTGTGTCGATAAACTTTCATCAAGGAAAGCCATAATGCTGCGAGTAGCGGAAGAAATTCCAAAGCTGAAGACCAGAACACAGAAGAGTGGAGGTGGAGACCAAAGTGCGCAACAGGGCGAAGGT…
ENSXETG00000020815	cdk16	-0.2662409165350938	cyclin-dependent kinase 16 [Source:Xenbase;Acc:XB-GENE-5856779]	ATGGATCGGATGAAGAAGATCAAGCGCCAGCTGTCCATGACCCTGCGGGGTGGGCGGGCCACAGAGAAGACATCCAATGAGCATTCAGAGCCAATAACGGGGGAGGAGAATAGCAGCAGTGATAATGAGCCCATCGTCAGAAATGGGAGAAGCCTCTCGTCCCACAGCATGCAATCCTTCCTGCACCACTACACCGCCAGCTCCTTTCAAAAGCCGCCCATCCCCCGGCCTCACAGCGCCGTGTGCCGCAGCCTGAGCTCTTACCTGAATCGGACCAGCAGACTAGAGATCGTCCACGAAGACTTGAAGATGGGGTCGGATGGAGAGAGCGACCAAGCGTCCGGCTCCTCGGATGAGGTTCAGTCGCCGGTGCGAGTGCGAATGCGGAACAACGCCGCG…
ENSXETG00000010280	pik3c3	0.3167656770611934	phosphatidylinositol 3-kinase catalytic subunit type 3 [Source:Xenbase;Acc:XB-GENE-6085226]	ATGCTCAAGTTCTCGGGTCTCTATCAGGAAACCTGTTCCGATCTCTATGTGACCTGCCAGGTGTTTGCAGAAGGAAAACCTCTCGCTCTCCCTGTGAGAACCTCCTACAAGGCCTTCAGCACCCGATGGAATTGGAATGAGTGGCTGAAGCTCCCCGTGAAGTATGCGGACTTGCCCAGAAGCGCCCAAGTGGCTCTGACCATCTGGGATGTGTATGGGCCCGGGAAAGCCATTCCAGTTGGTGGAACCACTGTGTCTTTATTTGGAAAATATGGAATGTTCCGCCAAGGAATGCACGACCTTAAGGTGTGGCCCAATATCGAAGCGGATGGGTCCGAGCCGACTAAAACTCCCGGTAGAACGAGCAGCTCTGCCTCTGAAGACCAAATGAGCAGATTG…
ENSXETG00000009845	gabrb1	0.22344637707954504	gamma-aminobutyric acid (GABA) A receptor, beta 1 [Source:NCBI gene;Acc:100489344]	ATGTGGACTCTCCGGGGCAGGGGATATTTCGGGATGCTGTCGCTGCCCGTGATGATTGCCATGGTGTGCTGCGCTCAGAGCGTTAACGAGCCCAGCAACATGTCATATGTGAAGGAAACAGTGGATAGATTGCTCAAGGGATATGACATTCGCCTCAGGCCAGATTTCGGAGGCCCTTCGGTGGAGGTTGGGATGCGAATTGACGTTGCTAGTATAGATATGGTCTCTGAAGTCAACATGGATTACACACTAACAATGTACTTCCAGCAATCATGGAGAGACAAAAGACTATCATACTCTGGGATTCCATTAAATCTAACATTGGACAACAGGGTCGCCGATCAACTGTGGGTGCCAGATACATATTTTCTAAACGATAAAAGATCTTTTGTTCACGGT…
ENSXETG00000033932	dmp1	0.2438816478835398	TSC22 domain family member 1 [Source:NCBI gene;Acc:594936]	ATGCACCAGCCTGATCCAGCCGCAGATCTTGCTGCCAGGAAGATGGCGCACCCGGCAGATCTGCCCAGAAGGGGTAGTGGGACTGGTGGCAGCTCGGCTGCGCTGCATGGAGCAGTAGGGCCAGGGCTCGCCGGCCACGTCCTGTCTTCAGATGATTACCCTCCTCTGTTGGTGCAGCCTCCGCCTCCCGCCGCAGCTTCATCTCCTGGACCCCAGCAGCATCCTCCCCAAACACTGAATTTACTGCCCCAGCCACTTGTGCAGAGCGGCGCCCAGATCAAGAAGAAAAGCGGCTTTCAGATCACCAGTGTAACTTCTGCTCAAATCTCAGCCAGCATGAGCTCCAACAATAGCATTGCTGAAGATACCGAGAGCTATGACGATCTGGATGAGTCTCAC…
ENSXETG00000022556	btbd6	0.19517760119746716	BTB (POZ) domain containing 6 [Source:Xenbase;Acc:XB-GENE-6258082]	ATGCCACTAGACCCAGGCTGCCTTAATGGCAGGGTCATGAAGTGTTTGACTTTCTTTCTTCTGCTTCCAGAGACCTTAAAGAAGTCTAGAAAGAGTGCCAGGGCACAGGGCAAGGTGCAAGCATGCTATGAGATAGTGCCCTTGGCCCTCAAGAAGAAGATGGCTGCAGAGCTTTACCCTGCCAGCGCAAACACCAATATCGCTAACAGTAACGCCGCTGCCAACGCCAAGAAGAACGCCCTCCAGCTCCAGCAGGCTGCCCCGCCGCCGCCGCAACTCCACAACCTCAACAACAACAACATTGAGAGCGGCAACTGGCAGTCCTTCCACCCGACCCTGCGGGAGAGGAATGCTCTAATGTTCAACAACGAGCTTATGGCGGACGTTCACTTCATTGTG…
ENSXETG00000039371	NA	-0.1882999358955561	NA	ATGCCCCCCCAGACCCCCTCAGGCGCTATAAAGGTAAGTGTGGGGGGCCGAGGAGGGACGGAATCCCAAAAGTGGAATTTATACAGAAGTGCCCCTACGATGGTGCGACCTGCTGCTACGGTCGGTTGGTGGTTTCTTGGCTTTTTGCTGCTTCTTCTCCCCCATCCAGGGACCCCCTGGTACAAGCATTCGGCCAGCCCCCGATATCACACAGTGGGCAGAGCTTCTGGACTTCTGATTGGGGTCCGCAGGTCGCCTTATTTATGGAGAAGACAAATGACAGAGGACAAAGTTGAAGAGAACCAGCAGAGAGAAGTTGAGGGCATGAAGGTGACACAGGGTGCAGAGAGAAGCAACTTCCTTTCAGATCCCAGGGAGACCCCTGAGAGGTGGGAGAAG…
ENSXETG00000018594	ppil2	0.6860493773528806	peptidylprolyl isomerase like 2 [Source:Xenbase;Acc:XB-GENE-855860]	ATGGGGAAGCGTCAGCATCAAAAAGATAAAATGTACATCACTTGTACAGAATACACAAACTTCTATGGAGGAAAGAGACCAGATATTCCAAAATCAAATTTCAGACGCCTGTCGTTTGATCACTGCAGTTTGTCCTTACAGCCCTTTGAATATCCTGTTTGCACACCGGATGGAATAGTCTTTGATTTGCTGAGCATCATCCCTTGGATAAAGAAATATGGCACCAACCCAATCACGGGCGAGAAGCTTGAGGCCAAGTCTCTAATAAAACTGAATTTTGCCAAGAACCAAGATGGCAAGTATCACTGTCCCGTGCTCTTCTCTGTTTTCACCAACAACTCCCATATTGTGGCTGTGAACAAAACTGGAAATGTCTTTTCTTATGAGGCTGTTGAGCAA…
ENSXETG00000015923	XB5949052	0.1845474443722613	high choriolytic enzyme 2 [Source:Xenbase;Acc:XB-GENE-5949053]	ATGCACCTAGTGCTGCTGTTTGCTGCTCTCTGCGGCTCATGTCTGGCCTTTCCCACTCAAAAACCAAATGAGACACCAATAGAGCCAACTGAGAGGAACCAAGCCACGGCTGGGGAAGAAAACAAGAGCATGTTTGACAGACTCTATGAGGTCAACAAAGATGCATTGCCTTTCACTGGAAAATACATTGTCAGCAATCTGGATATTGCCTTGAAATTGGGGAAAAGTGCCAACACTTGCCCCAAGGGAATCTGCCTGTGGCCTAAATCTTCGGATGGACTTGTGCGGATCCCCTATGTTATTTCCAGTGATTACTCATCGTATTCAAATGCCCTGTTTCAAGCATCTTTCAAAGGCTTTGCCGATACAACTTGCATTCGTCTTGTGCCGCGCACATCA…
ENSXETG00000019911	slc4a7	0.4312203543482376	solute carrier family 4, sodium bicarbonate cotransporter, member 7 [Source:Xenbase;Acc:XB-GENE-963950]	ATGAGACCTCTGCTCACCACGGGACATGATGAAGAAGCTATTGTGGACTTGGGGAAGACCAGTTCTACGGTAAACACCAATTTTGAGAAGGAGGAGCTGGAAAGTCACAGAGCTGTTTACATTGGTGTTCACGTGCCATTTGCCCGACAAAGTCGTAGACGACATAGACATAGGGGTCACAGGCATCATCGAAGAAGAAGAGAGAAAGAGAACGATAAGGAGGATGGAAGAGAATCTCCCAATTATGACACCCCTTCCCAGCGTGTGCAGTTTATTCTTGGCACTGAAGATGATGATGAAGAGCACATTCCTCATGACCTTTTCACAGAAATGGATGAATTGTGTTTCCGGGATGGTGAGGAATGTGAATGGAAGGAAACTGCAAGGTGGCTCAAATTT…
ENSXETG00000001592	bptf	0.3595719882368362	bromodomain PHD finger transcription factor [Source:Xenbase;Acc:XB-GENE-6054434]	ATGAGGGGCCGCCGGGGCAGGCCGTCCAAATGCCCTGTGTTGCCCGACTGCTCCCCGGGGCCCACCGCCGGCCTGAGGTCCCGCCTCCGGGGCAGTAGCAGGGGCCGCTGGGCACCAGAGAACCAAGGGACTCCCCGTAACAGCAATAGGGTCAGCTCCCCGCCCTCCAGCACTTCCCCCCGGGGCCGGAGGCGCAGGAAGGCCGGCACAGGCCGCGGAAGGGGTCGGGGTCGGGGCGGCCCCAGAGCAGGAGCCCGGAGGAACCTGAACAAAGTGGTGTATGATGATCATGAGAGCGAAGAGGAGGAGGATGGGGTGCTGGGGGGCCGCAGGGACAGTGAGGAGGAGGAGGCAGACGAGGAGCCGGAGGAGGAGGAGGATATGGAGGATTCGGATTAT…
ENSXETG00000021501	apc	0.09586721158097786	adenomatous polyposis coli [Source:Xenbase;Acc:XB-GENE-480855]	ATGGCTGCTGCTTCGTATGACCAGTTGTTAAAGCAAGTGGCGGCACTGAAGATGGAGAATACAAACCTTCGACAAGAATTAGAAGACAATTCCAATCATCTTACAAAACTAGAGAGTGAGGCATCAAACATGAAGGAGGTTCTCAAGCAGCTACAAGGAAGTATCGAGGATGAGGCAATGGCTTCTTCTGGCCAGATTGATCTGCTGGAGCGTCTTAAAGAACTAAATTTAGACAGCAGTAACTTCCCTGCAGGCAAGACTAGGCCAAAGATGTCTATGCGTTCTTACGGAAGCAGGGAAGGCTCTCTCTCTGGTCATTCGGGTGAATGCAGTCCGGTCCCTGTGGGTTCCTTTCAAAGAAGAGGCCTTTTAAATGGAAGCAGAGAAAGTACTGGGTAT…
ENSXETG00000021586	nlrx1	-0.006373697511276838	NLR family member X1 [Source:Xenbase;Acc:XB-GENE-6039800]	ATGCAGTGTTGCTGCTCTGAGACCCTTTTTGGGGCACTGGGAAGGTGGAAGATTAGACTTTCTATTAAAGGTGAGTACAATGAAATATGTCACTACTTTGCTCTGCTCTATAAATTGAAGTCTACAGTATTCAACAGTTCATTTATTTTTGTTTTAGAAGTATCTCGATTATACCAGAAACGTGTCTATCACTCCCTGATTAGTAGGAATGGGTCCCATTTGACCCTGCTTTCCCAGGGCCAGCAATTCTGCTGTCTTCAAGGCTGGAGGGCTTCAAGCAGTGTTGCTGTAGATCCAATTCAGCAGCACCGACTGCGCCTGTCTGACTGGTTTAGCCGCTTGCCCAGTGAGGAGCAACACTTTGGTCCATCTTTCTCCCTTGATTCCATCCACGTGGAC…
ENSXETG00000037846	rbl2	-0.6737026875094414	NA	ATGGTCACCTTGATTCCTTCTTATTTGCCCTCGGATGGGGGGGCTCCGGCAGCCAGTGCGGCCCCCTCAGTGGAGGAGAGTTTGGGGGTGCAGCCCCCCCTGACCCTGCTGGTCCTCCTGCTGGTGCCCTGCGTGCTGCTGCTCTTCCTGCTCAATTGCTTCCTGCTGTTCCACCGGCTCCCGGCCCGGAGAGGGGCCCCCCGGGGCCAGTACCCCCACAGCCCAGCAAGGCTGGAGCCCCCCTATATCCCTACCCCGGGGCCAGTGCTGCGGGGGGGCCGCCTGAGCTCTGACACCATTAGCCAAGGCTTTGAGGCCACACTGGCCCTGGAGGAGGGGGTTTGTGGGCGACTAAACCGACCCCAGTCCAGAGAGAGTTGCTATAAGGGGGGCAGTACC…
ENSXETG00000035055	aoah	-0.009704551414086465	protein phosphatase 1 regulatory subunit 36 [Source:NCBI gene;Acc:100497339]	ATGGATCCTACAATAAAGCCAAATCCTGGACACTGGTTTTGGAAGGAAGACACTAAAACGTTGGAATTTTCAAGGTATATGAGTAACAACGCATTTACAGATTCCAGAGAAAGAATTAAAAAGGGCAGAGCAATACACTTCCAGGATAATCTAACCAAAGCACCAGACAGTTACTTCTGCGCTCTACCTGGAGCTAAATCCCCCATTTTCAATGACAGAATGCCCAAATCTCCCAGGCAAGCCAATAAGCGAGACGAGTATGTCACACTAGAAGATGTCAAGTGTGTTGCCTTAAATTTGTTGCAGGAACAGGAAAGACAATGCATAACTTCATTTTCTACAGCTGTAAGATCTCAGCTTCTGGATGAATTCCTTATGGCCCTACTTTATTATCTTTCC…
ENSXETG00000015931	slc9a3r2	-0.038858055650670714	SLC9A3 regulator 2 [Source:Xenbase;Acc:XB-GENE-481282]	ATGGCCCAAGAGCGGCACCGACCCCGGCTGTGTCACATCAAGAGGGGAGAGCAGGGCTACGGCTTCCACCTGCACGGCGAGAAGGGCAAGAGCGGCCAGTACATCCGCAAGGTGGAACCCGGCTCCCCCGCCGAGGCTGCCGGACTGAAGGCTGGAGACCGGGTGCTGGAAGTCAACGGGGACAACGTGGAGAAAGAGACCCATCACCAGGTGGTTCAGCGCATTAAAGCAATAGAAAACGAAACGCGGTTGCTGGTGGTGGACAGAGAAACTGATGAGTACCTGAAAAAATCCCCACCCGGCTCACCTACTGAATCCCAACCCAACTCCAGCGCCCCCTCAACTCCAACTCCAGGGAGCAACAACAACGGCGAAGTATGGAAAACAAAGGAGGACACA…
ENSXETG00000014155	dnajb5	0.5019566072518342	DnaJ heat shock protein family (Hsp40) member B5 [Source:Xenbase;Acc:XB-GENE-995211]	ATGTTCAAGTGTGAAAAACGGCAAAAAGTCGGCAACGAGTTCTTTATCAAGTCCATTGGCGACGGCACCGCCGAAAAGCGCAGAACCACGTTTTTCAGAGTCGGTATCAGCTTAGGGATCCTCTCTGCTCATTTTGGGGGGACAAGGATTCTTGACCAGAAACCCCACACGTTGGACATGGGGAAGGATTACTACAAGATCCTGGGACTCGCCTCTGGCGCCAACGAGGATGAGATCAAGAAGGCGTACCGCAAGATGGCGCTGAAATACCACCCGGACAAGAACAAGGATGCCAACGCCGAGGATAAGTTTAAGGAGATCGCAGAGGCCTATGATGTCCTGAGTGACCCCAAGAAAAGGGCTGTGTACGACCAGTATGGGGAGGAAGGGCTGAAGACA…
ENSXETG00000012909	kyat1	0.2759563023308734	kynurenine aminotransferase 1 [Source:Xenbase;Acc:XB-GENE-966486]	ATGTTCCGCTCCAGAGCACCCTTCCTAGCAGCTCTCTCTCTGCCTGGGTACAAGACTCACACTTCAGCCTTTATTCAGAACAAAGTCCAGCCTTTGCTTTCTCTGCCTCTCCATGGACTGCCAGGGTGGGGGGGTCATCGGCTGATCCCCAGAACAGACTTCGGCACTTGTCAGCCTGAGAAAAGGGGCTCAGCAGTCAGGAGCATCTCTTGTTCTGTGCAGGACGCCATGGCAAAGCAGTTGCAGGCCCGGAGGCTGAAGGGAGTGGATGAGAATATCTGGGTAGACCTGGTCAGTTTGGCCGCTCAGTACAAACCAGTGAATCTGGGGCAGGGATTCCCAGACTTCCCCCCGCCAGCGTTTGTGAGAGAAGCCTTTGCCAGGGCCGTTACTGAGGAG…
ENSXETG00000009843	commd8	0.003553320129048826	COMM domain containing 8 [Source:Xenbase;Acc:XB-GENE-942437]	ATGGAAGGAGAAGCGCATAGCGGGTTGCGTCTGATCGGGAAGCTTCCCGCAGCGCAGTGCCCACAGTTCTTTCACAAAGTCATAGATGGAGTATGTGGCCGGGCACAGCCTCGTTTCCAGGATTATGGCAATATATGGAGCCTACAGGAATGGCTGGAAGTTCTAGAAGACTCCACAGCTTTCTTCAAGAACAGTATTGGTGCTGATGTAAATGCAGATGAGGTTTCTAATGGGTTAAATGTGCTCAGTGCAGAACACCAAGAAGTGATCCTAAAGTGTTTGAAAAGTAGAAAACCTGACATAGCAGAAGCTGTTGTGGAGAAGGCGTGTGCTATGTCATCTGCATATTTACAGGATTTTGACTGGCAGTTAAAGCTTGCCCTTTCTAGTGATAAGCTC…
ENSXETG00000021587	pdzd3	0.19176815708338432	PDZ domain containing 3 [Source:Xenbase;Acc:XB-GENE-486153]	ATGTACTTTGCACCTTTCAAAGGAAGACTGCAGAAATCTAAAGCCGGAATGAAGAAGCGCTCAGAAATTGAAGATGACCTCGTATTAACCACGAGGTTTCTATTTAACCCAAAGCTTGGAATTGATAATCCTGCTTTGTGTCTGGGAGAAGACACGGGTTCTGATCCCGAGCCTGCGGCAAGGATTTGCATTTTAAGGAAAGATGCAGATGGGGATTTTGCCTTTCATTTGAGTAAGGAGCAGGAGAGAGAGGGCCATATTGTGAGGCAGGTGGTTCCTGGAGGCCCGGCCTATCTTGCAGGACTGAGGGATGGAGACCAGCTGCTACAGGTTAATGGAGAATATGTGCATGAACAGGAGTACCTAAGGGTGGTACAAAAAATAAAGTACAGTGGTTCC…
ENSXETG00000022536	hspa2	0.48591029299241395	heat shock protein family A (Hsp70) member 2 [Source:Xenbase;Acc:XB-GENE-992125]	ATGTCTGCCAACGCTCCAGCTGTGGGAATTGACTTGGGCACCACATACTCCTGTGTAGGTGTGTTCCAGCACGGCAAAGTCGAAATCATTGCTAACGAACAGGGCAACCGAACCACCCCAAGTTATGTGGCTTTTACCGACACCGAACGTCTGATTGGGGACGCGGCCAAAAACCAAGTGGCCTTAAACCCGGCTAACACTATATTCGATGCCAAACGGCTGATCGGGCGCAGGTTCGATGACCCCACGGTGCAGGCTGACATGAAGCACTGGCCATTCACTGTGGTAAGCGATGGGGGCAAGCCCAAAGTGAAGGTGGAGTTCAAAGGCGAGAATAAGACGTTCTTCCCTGAGGAGATCTCTTCTATGGTGCTAAGCAAAATGAAGGAGGTGGCCGAG…
ENSXETG00000038987	NA	0.7568735485621902	NA	ATGGGAAAGACCAAAGAGCTGTCCAAGGATGTCAGAGACAAAATTGTAGACCTGCACAAGGCTGGAATGGGCTACAAAACCATTAGCAAGAAGCTGGGAGAGAAGGTGACAACTGTTGGTGCGATTGTTCGAAAATGGAAGGAGCACAAAATGACCATCAATCGACCTCGCTCTGGGGCTCCACGCAAGATCTCACCTCGTGGGGTGTCAATGATTCTGAGAAAGGTGAAAAAGCATCCTAGAACTACACGGGAGGAGTTAGTTAATGACCTCAAATTAGCAGGGACCACAGTCACCAAGAAAACCATTGGAAACACATTACACCGCAATGGATTAAAATCCTGCAGGGCTCGCAAGGTCCCCCTGCTCAAGAAGGCACATGTGCAGGCCCGTCTGAAG…
ENSXETG00000014778	nufip1	-0.14323545417284528	nuclear FMR1 interacting protein 1 [Source:Xenbase;Acc:XB-GENE-1015991]	ATGGGTCATTATTTCTGTTCAGTTAGAATCCTATATAACAGCTTATTATACGCACGTTGTCTGATGTGTGCTCTGCTATCTGCTAGTATGGAGCACAGCAATCATTACCCGGCTCCGGTGCTTAGACCTCCGGTATTTACAGCAGGGCCCAGCTCTGGCCCTCCACCCTCCGCTCCATGGTTTGACTGCCCTCCACCTCACCCACAGGGACTGTGGGGTGGGGGATGGAACCAGTGGCGGCCTCAGTACAGACAGCAGCCGTCATACAGCGAACAGCGTGGAGGGGGACATGGATATTTTAACCATGAAAGCCGAATGCCATTTGGAAACTGTCAAAGTAGAACAAAACAACATTCGAAAAAGCAAAAGAAAGAACCAGTTTACACATACTACTGTGAC…
ENSXETG00000024630	ccdc153	-0.00202747697282582	coiled-coil domain containing 153 [Source:Xenbase;Acc:XB-GENE-6258448]	ATGCCACCAAAGCAGAAGGGAAAATCTCAAAAGAAAAAGGGGAAGAAAACAAAGAATGGAACAAGCTCAGTAGACGACCAGTACCGCAAGGCAACGTTGGAAGTTGAAGTTTTACAGAATCACTTGGCGCTGCGCAGGCAAGTAACACGGCGAACTCAGGAACACAAAGAGGAGCTGCATGCAAAACTGCAAGAGCTGCAGGGAGACCTGGAAGAGGAGAAAAGTGAAAAACAAGCTATATACAGTGAAATGACACGTCAGCAGCAGGCTTTGGAACAGCAGAGCTCAGCATCTATCCAGGCCCTGAAACAGGAGGTTGCGGAACTGAGGTTACAACTTGGTGAGTCTCAGCAAGAGCTAAAGGAAGTCCGTGAAGAATTGGAGCACACAAAATCCGAG…
ENSXETG00000004670	mvp	0.19957604473861287	major vault protein [Source:Xenbase;Acc:XB-GENE-5880837]	ATGAGTGAGGAATCCATTATCCGCATCCCTCCGTACTACTACATCCATGTCTTGGATCAGAACAGCAACATCTCCCGCGTGGTGACTGGGCCCAAAACCTACATCCGCCAGGACAATGAGAGGGTCCTGCACCACCCCCAGCGCATGGTCATGGTGCCCCCCCGCCATTACTGCGTGATCCAGAACCCCGTGCAGAGGGACGCAGACCTGAGAGTTCTGTTTGATGACGTGGGACAGACCAAGCTCAGCCACGGGGACAAGGAGATCCGACTCACCCAGGACCCGTTCCCCCTGTACCCTGGGGAGGAGCTGCTGCAGGGCATCACCCCCCTCACCGTGGTCCTTGCCAACACCGCCTTGCACCTCAAAGCCTTGTTGGACCTGGAAGAAGAGAGCGGC…
ENSXETG00000040876	tmem147	-0.11480789321477464	acrosin [Source:NCBI gene;Acc:100490933]	ATGGCCAGCATTCAGATGCTTTATAAAGACGGCTATGGGTCTGCTTGTGGCGGCGTGCTTTTGAGCAATCGTTGGGTTGTAACGGCAGCTCATTGCCTATCTGATTTAAAGAGATATCGCCACTTAGCACGAATTGTGCTTGGAGCACGTGACTTGACGCAACTGGGACCTGAGACACAGATCAGAACTATCAAACAATGGATACAGCATGAAGATTTTGATCATAAAACACATAAAAATGATATTGCGCTGATTCGGTTAAATTACCCAGTTAAATTCAGCGACTACATACAGCCGGCCTGTTTACCCCCTAAATCTTCTAATGTCTACAAGATGGATGACTGCCACATTGCCGGTTGGGGACTTCTAAATGAAAAACCTAGAACAGTCACAACTATG…
ENSXETG00000024065	usp42	-0.10208499556642392	ubiquitin specific peptidase 42 [Source:Xenbase;Acc:XB-GENE-920936]	ATGACTATAATAGATAAAGTCACAGTGGCACCCTCATCAGGAGAAATGGAAAATGGATCTTCAGTTTGGGGTGTTGTATCAGCCCTAGCTAAAATTGGGCTTGGACTGGTACCTGCTGCAGCCGTGTATTCAAGCTCATCTGTTCCTGAAAAGCCTAAACCTGGGGATGGCATTGATCCACCCGAGAAGATTCTTTTTCCCCCGGCAAAGATCTGTCTGAAGTGGCAACGTGTGCAGAAAGTTGGAGCTGGTCTCCAAAATCTTGGGAATACATGCTTTGTGAATTCTGTATTACAGTGTTTAACTTACACGGCGCCTCTTTCTAACTACCTTATTAGCCGCGAACACTCTGAAACATGTCACAGCCAAGACTTTTGCATGATGTGCGTAATGCAGACA…
ENSXETG00000001002	papln	0.1023605640662387	papilin, proteoglycan-like sulfated glycoprotein [Source:Xenbase;Acc:XB-GENE-855687]	ATGCTGAAGCCTGCATTCCTGTTACGAAGGCCCAAACGGCAAAGTGACTTTTGGGACAATTGGGGAGAATGGAAAGAGTGCAGCCGTACATGTGGGGGCGGAGTAAGCTTCAGAGAGCGCCAGTGCTACTCCCGCAGGGCAGATGGGGGATCGAATTGTATTGGACCAACCAAAAACTACCGTTCTTGCAATGAATGCCCTGACGGCTCTCGTGATATCCGTGCAGAGCAGTGTTCAGAATATGATGGAATGGAATTCCAAGGCAAGAGGTACAAGTGGCTTCCATATTATGGAGCATCCAATAAATGTGAGTTGAACTGTATCCCCAAGGGAGAGAATTTCTACTACAGACACAAGATGGCTGTGCTTGATGGGACCCCATGTGAGCCTGGAAGAAGA…
ENSXETG00000015934	nthl1	0.2751453093712505	nth-like DNA glycosylase 1 [Source:Xenbase;Acc:XB-GENE-962530]	ATGAGTGGCAGTCTCCGGCCGCTGGGAAGGAGGGGAAGGAGGGGAGTTCTTAAGGCAGTGGGGGGCAAGGATCAGCAGGATGGGACCAGCAAGGGGCAAGTCATTGATGACAGTGAAGATGAGAAGCCGAGTTCCCCCAAAGAGCGATCAAAGAGGAGAGTTAGTGTGGAATACGAGCAGGCAGCAAGCGAGACTGTAGCTAAAAGGCCAAAATGGCAACCAAAGAACTGGGCGCAACATCTGGAGAACATACGGCAGATGAGAAGCAGAAGGGATGCGCCGGTGGATCAGATGGGAGCGGAGAAGTGCTATGATCAGAATGCTGCCCCAGAGGTAATGAGGTACCAGATCCTTCTGTCGCTCATGCTCTCCAGTCAGACTAAAGATCAGGTGACCTCA…
ENSXETG00000014175	vwa5a	0.4187932088311057	von Willebrand factor A domain containing 5A [Source:Xenbase;Acc:XB-GENE-5898460]	ATGGCTCCCTTCTTTGGCCTCATTATTGTGTGCTCCAGGCAGCCAGTGCCGCTCCGTGGGATCTCGGTGGAGGTGCAGGTAAAAGGCTTCGTGGCTGATGTATGTGCCACACTGAGGTACAAGAACACGGAGGAGAAGCCCATAGAAGCCATCTTTGTGTTCCCTCTGGATCAGGACTCTGCCGTGTACAGCTTTGAGGCCACGGTGGAAGGGAAGACCATAGTGGCAGAGCTACAGGAGAGGGAGCAGGCTACCAAAACCTACGGTGAGGCCATCAGTAAGGGCCAGCAGGCCTTCTTATTGCAGGAGGATAAGAGCTCTGGCGACATCTTCAGCTGCAGCGTTGGGAACCTACCCCCTGGGCAGGAGGCCGAGGTGAAACTGAGCTTCGTGCAGGAG…
ENSXETG00000014229	cspg4	0.0559504814205499	acid sensing ion channel subunit 2 [Source:NCBI gene;Acc:100492214]	ATGACTCGGGAAGAGAGGATCCGGGCTCCAGCTGGCAGCTGCCCCTCAGGAGTGACCAGAACGGATGCCCATGTGGTTTCTCAAAAATGCCACACAAGGACACAACATCGCCATGCCTTATCTCTGCCCTCCCTGCAACACATAAAGTTGCATGGCCTAAAATACATCTGCTCGCCCAAACTAGCATTTCGGCATCGTACTTTTTGGTTTTTGGCCTTCTTCACTTCTCTGGGCTTCTTTCTGTCCTGGTCATCCAACAGACTCTTGTATTGGCTGTCCTTCCCCTCGCACACCAGGGTCCAGTTGGAGTGGAGCAAAGAGCTGGCTTTCCCAGCTGTGACATTTTGCAACAACAACCCTGTTCGATTTCATCGGCTCAGCAAAAGCGACCTGTATTTC…
ENSXETG00000040269	esm1	-0.16729684986784993	NA	ATGTATGCAGTTGTGGAACAACACTTCCAAAGTGCATACCTCTGTTGTGGATGTGAGCGAGTTGCCACTTTAGAGGCTCGCGTTAGAGCACTAGAGGAACAAGTTGCAACACTGCGTTCTATTGACAATCTTGAAAGAAGTCTCTTGCTAACTGAACAAGAACTAGCGGGGTCAGATAGTATGGGGGGAGGGGAGCAAGGAAAGGATGATAGGGCAGTAAGCTGGGTGACAGTTGGAAAATCGAGTGTGGGGAAAAGAAAAAGGGAGGCTGCTCCAGGGTTTGCGCATCCCAACAGATTTGCCAGATTGTGTGAAGAAGATGGGAGTGTGAACTCTGGACTGGCGGTTCTTGATGAGGCTGATCTCTCTAACAGCCGGGAGACCAGTTTCTCTAGTAGT…
ENSXETG00000007884	gzmak	0.22025100811600748	uncharacterized LOC100038305 [Source:NCBI gene;Acc:100038305]	ATGGAGCGAGTCCAAGCTGAAGCTAAGAGGAAAACACCAGAAGAGTTGGTAATGATTTACAAGGGCATTCCCTACCCGAGCTGTATTTGCAGTGAGGAGACCTTTTGGACAAATTGGGTAATTCGAATACTGCATGAAATGTTGTTTTTCATCGGTGGTAAAGAGCCTTCTATAGATCAAGCTATGATTGAATTTGGAAAACCAGAAAAAGTACAGGCTCTTAAAGAAGCATCTTCACCAAGAGTGTTTTCAACACATTTGCATTACAAGGACATCCCTAAGTCATTTTTGGAAAAGAAAGTAAAGACTTTGTTGATCCTTCGTAATCCCAAAGACACAGCAGTCTCTTACTTCCATTTCAGTAATAATAATCCAATACTTCCCAGCTATGACTCATGG…
ENSXETG00000021588	cbl	0.14821255410872922	Cbl proto-oncogene, E3 ubiquitin protein ligase [Source:Xenbase;Acc:XB-GENE-6258452]	ATGCTAATCATTACTACTCAGTTTTGTGCGCGTTCTCGCTTGAGAAAAGGCGGAAGTGACGGCGGCGGCGCGGTGCTCGGCCCCGGGAGAATCATCTCCCCCTCCCAGCCCGGCGCACACAGGGAGGGCTGTGTCCGGGGGCCCCGTGTTCACCAGCCGCAGGAATTCCACCCTGCTGCTCCACGCTCACTGGTCACCATGGCGACCAACCTGCGAAAGGGCGGCGGGTTGATCGGGCTGGTGAAAGATGCCTTCCAGCCCCACCATCACCATCCGACTGCGCAGCCGGGGGCTGTGGACCGGAAGACGGTGGAGAAATGCTGGAAACTCATGGATAAGGTTGTTCGGTTGTGCCAGAATCAAAGGCTAGCTCTGAAGAATAGCCCTCCTTACATTCTA…
ENSXETG00000005087	polk	0.2328166667569956	polymerase (DNA directed) kappa [Source:Xenbase;Acc:XB-GENE-985768]	ATGGATAACAAGCAAGAAGCAGCGCTTGCTCCCAGCAAGGAAGCCTTTCAGTTTAGGATGGGTCTCAATGACAACAAAGCTGGGATGGAAGGGCTGGATAAGGAAAAAATCAATAAGATCATAATGGATGCAACCAAAGGCTCAAGATTTTATGACAACGAACTGAAGAAAGACCAGCAAGTTAATCAGCGTATTGAAAAGCTGATGCAACAAAAATCTCAGCTGACAGACCAACAAATAAAGAAAGCTCAGATTCAGGTGGATAGACTTGCCTTGGAACTTGAAAGGAACCGTGATTTAAGCCGTATTATTGTCCATGTTGATATGGATGCATTTTATGCAGCTGTAGAAATGCGAGACAGCCCAGAGCTGAAAGACAAGCCAATGGCTGTTGGCTCA…
ENSXETG00000039277	NA	0.4570446247263569	NA	ATGGATCCCGAGGAAGCGGTACCGGACGTCGGAAGAGCCCTTCGCGGGCTGGCGTCCCGTATGGAGGCGTATGAATCCCAGCAAGTCAGAATTGGGCAAGTACTTGATTCCATTTTGTCCCGTTTGCCCGTTACTCCCGCTGTCGCGGAAATTCCTCCTGCTGTGGTGGTTCCTCTGCCAGCGATGCCGCCAGCTCGTGAGCCACGAATACCTCCTCCTCCGCGCTACAGTGGCAATCCGCAGGCCTGCAGGGGATTCGTGACTCAATGCCAGATTCAGTTTGAGTTCCAACCTTCCCAATTCTCCTGTGAGCGAGCGAAGGTGGGCTACGTTATGTCTCGTCTGGAGGGCAAACCACTGGAATGGGCAACTTCTCTCTGGGAGAGTCAGTCACCCCTG…
ENSXETG00000016211	dhrs9	-0.04718161447502803	dehydrogenase/reductase (SDR family) member 9 [Source:Xenbase;Acc:XB-GENE-973205]	ATGCTTCTGTGCTTCTTGATCGGTGTGGCCATTCTGTACATCTGGTGGAGAGTGAGGGATGGACTGAAAATCAATAACATCACAGAGAAATATATATTGATTACTGGATGTGACACAGGATTTGGGAACCATGCAGCTAAAACATTCGATAAACAGGGCTTCCGCATCCTTGCAACGTGCCTGACGGAGGCTGGGGCCACAGGGCTGAGAGAGGCAACTTCACAACGGCTGAAAACAACACTGCTGGATGTGACTATTGCCGAGAATGTGGTATCAATGGCTGAATGGGTGAAAGGTGAAGTTGGGAGTAGAGGACTTTGGGGTTTGATTAATAATGCTGGAGTAATGGGAACCCTGGCACCCTTTGACTGGCTGACCATTGAAGACATCAAAAAGCCA…
ENSXETG00000017990	ptpn9l	0.1576385969852697	protein tyrosine phosphatase non-receptor type 9-like [Source:Xenbase;Acc:XB-GENE-5815286]	ATGCTGATATTAGCTTCATCCTTTGCCTGCATCCGGAACTATTTTGTAAGCCTGTGTGCAGGCACACGCGGGGTTATCGGCGCTCAAACACTAGAGTTTGCATATGGGAGAAGATATTACACATGTGTGCCTGCTATCGAAGAATTTCTGGCTGAGTTGAAAAACCGAGAACAACCACAGTTGGTTTCAGTGCCTCCTAACACTGCTCTGAAGTTTTTAATGGCTCGGAAGTTTGATGTTACTAGAGCAATTGATTTATTTCAAGCCTACAGAAACACAAGACTGAAAGAAGGCATCTATAATATAAATCCTGATGAAGAACCATTAAGAGCAGAGCTGCTAAGTGGTAAATTTACAGTTTTGCCTGGAAGAGATGCAAATGGGGCTGCTTTAGCTTTA…
ENSXETG00000022532	zbtb1	-0.3482232872567314	zinc finger and BTB domain containing 1 [Source:Xenbase;Acc:XB-GENE-1006815]	ATGGACAGGTCAAGTCATTGTAGTTACGTTCTTCAGCAACTGTACAATCAAAGAGAATGGGGATTTCTTTGTGACTGCTGTATTGCTATTGATGACATTTATTTTCAAGCCCACAAGGCTGTTCTAGCTGCTTGTAGTTCTTACTTTAAAATGATGTTTATAAATCACCAGAACACTGTTTCACAAATAAATCTCAGCAGCATAAAGGTTAGTGCACAATGTTTTGATCTTATTTTACAGTTTATGTACTTGGGAAAAATACTGCACCTCCCTGAAAATTTTGATCAGCTTAAGCAAGCAATGAGCTATCTACAACTGTATGTTATTCCTGAATGCTTGGAGGATATACAGGATGCAAATTCTTCAAACCTAAAATGCTCCTCTACAGCCTCTAGTAGC…
ENSXETG00000004985	mrpl1	0.2284234290147694	mutL homolog 1 [Source:NCBI gene;Acc:100170640]	ATGGCGGGGGTTATTAGGCGTCTGGAAGAGACAGTGGTTAATCGTATAGCTGCTGGGGAGGTTATCCAGAGGCCGGCCAATGCAATCAAGGAAATGATTGAAAACTGTTTAGATGCCAAATCGACCTCCATCCAGGTGACAGTGAAGGATGGAGGCATGAAACTTATCCAGATTCAGGACAACGGAACTGGGATTAGGAAGGAAGACTTAGACATAGTGTGTGAGAGATTTACTACAAGCAAGCTACAGTCATTTGAAGATTTGTCCAATATTTCCACTTACGGATTTCGAGGAGAAGCATTGGCCAGCATAAGTCACGTGGCTCATGTTACAATAACCACAAAAACAGCAGATGGAAAATGTGCATACAGAGCAAGCTATGCAGATGGCAAGCTAAAA…
ENSXETG00000022529	zbtb25	-0.05892267548314592	zinc finger and BTB domain containing 25 [Source:Xenbase;Acc:XB-GENE-958947]	ATGGATTCTTCTTGCCACAGTCAAGTCCTTCTCCAGCAGCTGAATATGCAGCGTGAGTTTGGATTTCTTTGTGACTGCACAGTTGCAATTGGAGATGTATATTTTAAAGCACACAGAGCAGTTCTTGCAGCATTTTCAAACTACTTCAAGATGATCTTCATTCACCAGTCCAGTGAGTGTATAAAGATCCAACCAACAGATATTCAGCCTGACATATTCAGTTACCTTTTGCATGTCATGTACACTGGAAGATGCCCAAAACAGTCAGTTGATCATATTCGTTTAGATGAGGGAATAAGATTTCTCCACGCAAACCTTCTGGCACTTTCTGCCAATGAGCAAACCAAAATGTTTTCAGCTGATACTATACAGTCTTCTAATTTATATGGGATCCAGATC…
ENSXETG00000002578	c2orf49	0.03634814888155344	chromosome 2 open reading frame 49 [Source:Xenbase;Acc:XB-GENE-939822]	ATGATGGCTAAAGCTAGTAGCAGTGCTGGGGTTGTTGCGCAGGACTCTGCTCTGTTGCTGCATCCCGAACTGCTCTCCCGGGATTTCTTACTGCTTTCCCTGGAGCGGAGAAACATTCCAGTTGAAGATGCTTTTAACGACAAAGAAAAGCTAACCAAGATCTTTGTACAGCATGCTATGCCTCTGCCACAGAGGGATTTACCCAGGAACCGATGGGGTAGAATGATGGAAAGCAAGAGAGGGGAGAAGAAAATTACAACTGTGCAGAAAAGTGCTGGCACCGAAGGCGTGAGAAAACGACCCCCTATTGTTTTTGATGGATGTTCAACCAGTACGAGCATAAAGGTGAAGAGAACAGAAAATGGAGACGCATTGCAACGACTTAATCCCTCCCCGAAG…
ENSXETG00000023119	frmd8	0.04592246273314968	FERM domain containing 8 [Source:Xenbase;Acc:XB-GENE-5852953]	ATGCCATTGTGTTTGCAGATGGACGGAAGTGAAACATCGCACAGTTCTGGGCTGAATGACTTCTTACTGAGAAGCAGCGTGTCTTCTGGATCACGATCAATGGATGTGATTGTTTACCTAATTAATGATGAGATAATACAACTTACAGTAGATGGGCTTTCAGTCATCACCGCACATGAACTACATAAGTCTATACGCGAGGCTCTTCAACTACCTGAAACTGCTCAGGATGTCTTTGCTTTGTGGCTCATCTCGCCTTTCTTGGAGGTGCAATTAAAACCAAAGCATCAGCCATACAAGGTTTGCAGACAGTGGCATGATCTCTTGGCTCGCTTCACAAACTGTTCTTCCAATGACATTCTCCAAGATGAACCATTTCTGCAATTCCGAAGAAATATA…
ENSXETG00000031732	fras1	0.23327883404883729	calpain 8 gene 1 [Source:NCBI gene;Acc:733929]	ATGTCTAACATAGCCGCTAGGTTAGCCAAGAGCAGGGCGGCGGCGGCTGATGGTCTTGGTACCAATAAGAACCCAGTGCAATATCTAAACCAAGACTTTGAGAAGCTGAGGGCACAATGCTTGGCATCTGGTACCCTGTTTAAAGATGAAGAATTCCCAGCATGCCCTTCTGCACTGGGTTTCAACGAACTGGGACCCGGCTCCCCAAAAACACAAGGAGTGATATGGAAGAGACCTTCGGAGATTTGCCCCAACCCCCAGTTCATTGTGGATGGAGCAACACGCGGAGACATCCGTCAAGGGGCTCTCGGGGATTGCTGGCTCCTGGCGGCCATCGCTTCTCTTACACTGGACGCGGATCTTGTAGCCCAGGTGGTTCCAGAGAATCAAAGTTTCCAG…
ENSXETG00000024990	vepp1	-0.32352932295490117	ventral pancreatic precursor 1 [Source:Xenbase;Acc:XB-GENE-483027]	ATGACTAACCCACTTGCCCTCACTGCCCAGCTCTGGCTTCTTACAGCTACATTCCTCTGCACAGGGGAGTGTCAGCACCAGGTCCGTGTCCCCCCGGGGCCCCTACTCCGCACTGAGGGCTCCGCAGTCTCCCTATGGTGCAATGTGAGCGGCTCCCCGGCCGGGGGGTTCGAATGGTCCGTGTTCCCCTCACACTCCCCCTCCCAGAAACTGCAGATCATCAGCTCCACCGACCCGCACTTCTCCTACGCGGTGTACCGGGAGCGGCTGTCCGTGCGTAGGGAGATCTACCTGCAGGGTGTGAGTGCCGGTACCGGCAGGCTCCATATCAGCCACCTACGGGCAGGGGATGCGGGGGAGTATGAGTGCCACACCCCCAACACCCAGCACAATTACTAT…
ENSXETG00000018652	rprd2	0.35693913063301363	regulation of nuclear pre-mRNA domain containing 2 [Source:Xenbase;Acc:XB-GENE-6257583]	ATGGCGGCGGGCGGCAGCAGCAAGGCCTCGGCGGGGGCACTGGAAGCTTCTCTGGACCGAAAAATGCAGTCTGTCACCAACACCATGGACTCCATCCAGAGCCTGTCCTCCTGGTGTATCGAGAACAAAAAGTACCACAGCACCGTCGTGCACCACTGGCTCAAGTGGTTCCGCAGATCCGGCTTTGGTCATAGACTTAACCTGTTTTACCTGGCAAACGATGTCATTCAGAACTGTAAGAGAAAAAATGCCATTGTGTATCGAGAGGCATTTGCAGAAGTGTTACCTGAGGCTGCTTCCCTAGTAAAGGATGCCTCTGTGGCAAAATCTGTGGAGAGAATTTTTAAGATCTGGGAAGAAAGAAATGTTTACCAAGAGGATGTAATTGCGAATTTCAGA…
ENSXETG00000005757	sntb1	0.02792913055129906	syntrophin, beta 1 (dystrophin-associated protein A1, 59kDa, basic component 1) [Source:Xenbase;Acc:XB-GENE-1013041]	ATGGCGGTAGCTGCAGCAGGAGCGCTCCGGAGCGGCTGGCTGGAAGTGCTGGTGCGGGGCCGCTGGCACAAAGTTCTGGGCAACTTGTATGAGAGCTCCCTGGTACTGAGCAGCCCGGAGCGGCCGGAGGATGCCCCCAGCTCTAACAGCATGACCAATGGCACCAACAGCAGCCCCCAGGGGGTCCGGACTGCCTTCACCGAACTGCCCGACACCGTGCCGGAGGCCATTGCCAACAAGAAGAGGGCAGTCAAGGTGGTCAAACAGGAGCTGGGGGGGCTGGGCATCAGCATCAAGGGGGGAAAGGAAAACAAGATGCCCATTCTCATCAGCAAGATCTTCAAGGGGCTGGCAGCGGATCAGACCCAGTCCCTGTATGTGGGAGATGCCATCCTGACT…
ENSXETG00000034988	NA	0.7636336178201009	NA	ATGGGAAAGACCAAAGAGCTGTCCAAGGATGTCAGAGACAAAATTGTAGACCTGCACAAGGCTGGAATGGGCTACAAAACCATTAGCAAGAAGCTGGGAGAGAAGGTGACAACTGTTGGTGCGATTGTTCGAAAATGGAAGGAGCACAAAATGACCATCAATCGACCTCGCTCTGGGGCTCCACGCAAGATCTCACCTCGTGGGGTGTCAATGATTCTGAGAAAGGTGAAAAAGCATCCTAGAACTACACGGGAGGAGTTAGTTAATGACCTCAAATTAGCAGGGACCACAGTCACCAAGAAAACCATTGGAAACACATTACACCGCAATGGATTAAAATCCTGCAGGGCTCGCAAGGTCCCCCTGCTCAAGAAGGCACATGTGCAGGCCCGTCTGAAG…
ENSXETG00000008277	aifm3	0.39539224598489575	apoptosis inducing factor, mitochondria associated 3 [Source:Xenbase;Acc:XB-GENE-5763104]	ATGGGAGGATGCTTCTCCAAGCCCAAACCAGTTGAGGTAAAAGTTGAGGTTGTTCTGCCTGAGAAAGAAAGAGAAAAAGAAGAGATGTCTCCAAATGGAAAAGCCAGTCCTCTTGCCTACAAAGCAAATGGAACTACTCGGCTATATCATCACGAGGAGAGACCAATAGTCCTTAATCCCTACACAAATCCTAAGGATGTGGTAGAAGCCTCAGTGTGTCACGTGAAGGACCTAGAAAATGGACAGATGCGGGAGGTTGATCTAGGATGTGGCAAAGCTTTGCTGGTTAAACAGAATGGAGAATACTATGCAATGGGACACAAGTGTCCTCACTATGGTGCACCACTAGTGAAAGGTGTGCTCTCTAAAGGTCGAGTGCGTTGCCCATGGCATGGTGCG…
ENSXETG00000019630	aff2	-0.19372622150025526	AF4/FMR2 family member 2 [Source:Xenbase;Acc:XB-GENE-952102]	ATGGATCTATTCGACTTTTTCCGAGACTGGGACCTGGATCAGCAGTGTCATTATGAACAAGATCGGAGTGCTCTTAAAAGAAAAGAATGGGAGAGAAGGACACAAGAAGTCCAACAAGATGAAGACCTGTTTGCTTCTGGCTTTAATCTGTTTGGAGAACCATACAAGACAAACAAAGGGGATGCTCTTGCAAACCGTGTTCAGAACACCTTGGGAAATTATGATGAAATGAAGGACTTATTAACAAATCACAACAATCAGAGCCATCTTGTAGGAATTCCAAAGAATTCAGTGCCACAGACACCAGCTCCAGTAGAGAAAAACGAGCAGAGCTTTTTTCCAGATCAAAGAAACAGGCTGGCCCCATGCCACCAAAGCAGTAGCCATCCATCATCCTCA…
ENSXETG00000030638	fbxo40	-0.046918563016559084	F-box protein 40 [Source:NCBI gene;Acc:100492195]	ATGGGAAGAACACATCGCCCCCCTGCAGGCCATCACCAGCACTGCGAGAGGTGCTTCAACAAGCGATGCCAGGCACCAATCAACAGCGGCTTCTCTTGTATCATGATCAACTGCCGCTCCAACTGTGGCGCCACCTTCCACCTGTGCAAAGAGGAGGAGCATCGACTGCTGTGCCCCTACGAATGGGTGCCCTGCCTGAACTCCGGCTTTGGGTGCCCTTTCTCCATGTCCCGATTCAAGCTGGCAAAGCACCTTAAGGTGTGTCCGGCCAGTGTGGTCTGCTGTTCTATGGAATGGAACCGTTGGCCCGTTATGGACAAAGTAACCTCATTATACGGCAACATTGCGAGCGAGGAGCACAGCGACGAATGTCTGGACGTTGCCTTGGCAATAAGGGAT…
ENSXETG00000002577	fhl2	0.1766475705469556	four and a half LIM domains 2 [Source:Xenbase;Acc:XB-GENE-969632]	ATGACTGAGCGCTTTGACTGCCACTACTGCAAGGAGTCTCTCTTTGGCAAAAAGTACCTGCTGAGGGAGGAGAATCCCTACTGTGTGAAGTGCTATGAGAGCCTATACTCTAACTCATGTGAGGAATGCAAGAAGCCAATAGGTTGTGATGGCAAGGATCTTTCCTATAAAGACCGCCACTGGCATGAATCCTGTTTCCATTGCTTCCAGTGCAAGAAATCCCTGGTGGACAAGCCTTTTGCTGCTAAAGATGAACACCTCATTTGCACTGAGTGCTACTCTAATGAGTATTCTTCTAAGTGCAGCGAGTGTAAGAAGACAATCATGCCAGGAACTCGCAAGATGGAGTATAAAGGTAACAGCTGGCATGAGACCTGCTTTATTTGCTCCCGTTGCCAA…
ENSXETG00000016438	jak3	-0.06629109929407587	Janus kinase 3 (a protein tyrosine kinase, leukocyte) [Source:Xenbase;Acc:XB-GENE-5904698]	ATGTCTGGTGAGGAAAGTCCATTACTATGGGGGTCACGCTCATCCAGCACCTCTTCTACTGCCACAGGCTCCCTCCAGTTACTTCTGTATCACTCCTCTCTTTCTGTTAATCCCCCCACTGAATCCCAGCTGACCTTTCCTGGGGGCCAGTATTCCGCAGAAGAATTGTGTATTGCGGCTGCCAAATCATGTGGGATCCAGCCAGTCTATCATTCCCTGTTTGCATTGGCATGTCCGAAACTCAAAACCTGGTATAATCCTAATTATGTCTTTACTGTGGACAGCAGCACCTCTCATGTTCTGGTTTATAGGATCAGATTTTTCTTTCCTCATTGGATTGGGGTAGGGGGACAAAAATCTTCTCGTTGCAGTCTTATGAAGCTCCCTCCTGACCCCCTG…
ENSXETG00000014779	gpalpp1	-0.38229545938393134	GPALPP motifs containing 1 [Source:Xenbase;Acc:XB-GENE-989473]	ATGGAACAGCGCGATTTCAAGCTTCCATGCAGTCAGACTGTCATTTTCGTGCACCGGAAGTCGCGTCGCACTGAAACAACGTCAACGTTTTCCAGCTGTGTTGTGCAGAGCAGCGTAGAATACGCGATGTCTCGGGAATTGATCGGCCCTGCGCTGCCCCCTGGGTTTCAAACCCATGATCAAGAAGAGGAGCCGGAGGAAGTTGCAGGCCCAGTGCTGCCACCTGGCTACAAGTGTGACTCCAGTACCTCAGACTCGTCAGATGACAGTGATCAGGACACATCAGAATCCTACAAACGGAGTTCATACACATCTAATAAGAACGACCCCAAAAGCAGCAAGCAAAGTCTGCCTGTGGTTACCACAGAAGTGGATGATGGATTTTTTGGCCCAGCTCTT…
ENSXETG00000018076	etv3	-0.03077480843287242	ETS variant transcription factor 3 [Source:Xenbase;Acc:XB-GENE-852742]	ATGAAAACTGGCTGTAGCATTGGGGAAAAGCCTAAAGGAGGGGGAGGGTACCACTTTCCAGACTGGGCGTACAAGGCGGAGTCAAGTCCTGGCTCCCGACAGATTCAGCTATGGCATTTTATCTTGGAACTGCTGCAGAAGGAGGAATTTCGGCACGTTATTGCCTGGCAGCAAGGGGAATATGGAGAGTTTGTGATCAAGGACCCGGATGAAGTAGCCAGGCTGTGGGGCCGGCGCAAATGCAAACCTCAGATGAACTATGACAAGCTGAGCCGAGCGCTAAGATATTATTACAACAAGCGGATCCTGCATAAAACAAAAGGAAAGCGTTTTACCTACAAATTTAACTTCAACAAGCTGGTTATGCCCAATTACCCGTTCATCAACATCCGGCCCAAT…
ENSXETG00000008264	itgb1bp1	-0.37902328085049936	integrin subunit beta 1 binding protein 1 [Source:Xenbase;Acc:XB-GENE-6072966]	ATGTTCCGCAAGGGGAAGAAAAGGCACAGCAGTAGCAGCTCTCAGAGCAGTGAGATCAGCACCAAGAGCAAGTCTGTAGATTCCAGCCTTGGAGGCCTTTCCAGATCAAGCACAGTGGCTAGCCTAGACACAGACTCAGCCAAGAGCTTCGGACAAGGCACTGGTACCTCTGAAGCGCGAGCTGAGTTCCGAGTCAGATATGTGGGGTCCATTGAGAGACTGAAATCAGAAGACTCTAACAGCCTGCAGGGGCCACTGGATTTAATAAATTATATTGACGTGGCACAGCAAGATGGAAAACTGCCATTCGTCCCCCCAGAAGAGGAATTTATCATGGCTGTCTCTAAATATGGTATTAAAGTAGCCACGTCTGACCAGTATGATGTTTTGCACAGACAC…
ENSXETG00000000786	dusp12	-0.18932637738562857	dual specificity phosphatase 12 [Source:Xenbase;Acc:XB-GENE-5900067]	ATGATCTGCGTCCTGCCTGGGTTGTACCTCGGCAGCGCTAGTGATGCTGCTGATCTGCAGAGATTGCAAGAGGCCGGTATCACTCATGTGCTGACGGTGGACAGTGAAGTACCAACTGGGCTGGATGGGTTCATTACAAAGTTTGTTCATATACTGGATGACGCCAGCCAAGACCTCCTAAGTTGTTTACCTGCATGTACAGACTTCTTGAAAGAGGCTTTGGGGAAATGTGGTCGATCTGTACTTGTTCACTGTCATGCCGGGGTGAGCCGAAGTGCCGCAGTAATTGCAGCTTATTTGATGCACACCTCCAATCTTTCCTTGGAAGATGCTTGCTCAAGGCTACAGGCTCTGAAGTCGGACATCCGTATGAATGAGGAGTTTCTTGGCCAATTATCT…
ENSXETG00000006203	map7d2	0.36680787225116607	MAP7 domain containing 2 [Source:Xenbase;Acc:XB-GENE-960947]	ATGGCGGAAGGGACAGCAAAGGCTTCTCCGCAGAGCCCCAAGGTGTCACCGGTGTCTCCAGTCATGGACTGCTTTTTCAAAACTGACGAAAGGCAAAGGCTTGCAAAAGAAAGAAGGGAGGAAAAAGAGAAGTGCCTTGCTGTCAGAGAGCTACAGATTCTGGAAAAAGAAAAAAGGGCCAAACTGCAGTATGAAAAGCAGGTGGAAGAGCGCGGGAGGAGGCTGGTGGAGCAGCGAATCAGAGAGGAGCAGAAGAAAGCCGCAGTGGAAGAGAAGAGGAAGCAGAAGATCAAGGAGGAAGAAGTAAGACTGATGATTTCTTCAACAAAATGGGAGCGCTTAGAGGCCATGATGCGTCGTGCCCAGGAACGCAGTCAGCAGCTGGAGCAGAAACAGAAG…
ENSXETG00000018654	prpf3	0.46386573306155365	pre-mRNA processing factor 3 [Source:Xenbase;Acc:XB-GENE-996787]	ATGGCTCTTTCTAAGAGAGAACTGGATGATTTGAAGCCATGGGTGGAGAAAACTGTGAAAGGAGTCTTGGGCTTCTCTGAGCCTACAGTAGTCACTGCAGCTCTAAACTGTGTGGGGAAGGGAATGGACAAGAAGAAGACTGTTGATCACCTGAAACCCTTCCTTGACGACTCCACTTACCGTTTTGTGGATAAGCTGTTTGATGCAGTAAAGGAAGGTCGCAGCTCGAGGCATTCAAGATCTAGCAGTGACAGAAGCAGAAAGCGGGAGCTGAAAGAGGTGTTTGGAGAAGATCCAGACCTCTCCAAGGATTCATCCAATTCCAAGAAGAAGCGAATACCACGTTTTTCAGAAGTAGAGGAAGAGCCGGAGGTGATACCAGGCCCTCCCTCAGAAAGC…
ENSXETG00000020592	NA	-0.11880206613869654	NA	ATGCATTTTACACAACTGAAATACCCTTTTCCAAATAGGGTTTTATTGTTTGTGTGTAAAAATGATCCCCATTGCCATCTTCAGAGGTCCATTTACCACATCCTGAAATCTTCTTGCCAGAATGGAACCAATTTAGACATTGAGAACATCACAAATTCTGCCTCTCAGATCCTCAGCAACGATTCTTGGTCTAATCTCAACTCTTCTGAAGTCAGAACTGTTATCAATGGACTCCTGGGGAATGTGGAATTATCAGTATTGGAATTATTTTCTATAAATCCCACCAATCGCAATTTCAGCACCCCTGAGATAGATGTTGCTACCAAGGTGGCCCAAGAAAACTGTTCTTTCCTAACCATAACGGTGGGACTCAACAGGATGCAAGTGTCATGTGACCTC…
ENSXETG00000036976	pdzrn3	0.07202779631225517	NA	ATGACTGAGACAAAAGATAAACTGATAAATTCTAACTTTGATGGGATGTTGGAGGAAAAGAATCCCCATGTAGAAGAGGCCGAAGCTGAGGCATATTTCCAGCTTCTTAGTGATAAAAAGATTATGTCTTTCCTTCAAAAGGACCGCTTTTACAAAATAGCAGACAAATACCTTCTTGCTATAGTGCTTATATATTTCAAGCGTGTGGGACTAAAGATTGATGAATTTAATCGGCAGAACTTTGTTTTGTCCCTGTACCTGGCACACGAGATTGAGGAAGATACAGATATCCCAACGATGGCCATGCTTGCCTGGGTTTTAGGAAAGAACCTGAAAGAAAAGCGCAGAAATTTTCTTAGGAAGTGGGACAGGTTCTTACAGCAGATGGACTACAGGGCA…
ENSXETG00000015935	tsc2	0.4475279666867049	TSC complex subunit 2 [Source:Xenbase;Acc:XB-GENE-981706]	ATGGCCAAGCAGATGGGTAAAGATCCTGGCCTGAAGGAAAAGGTGAAAATGCTATTGGGATTGGTGCCTGCACGAGTTAAAACCAAGCCTTCAGAGTGGAAACATCCGGAATATGTCATTACTGCAGATTTAATGAAGGAGCTGAGCTCTGAGTCTGCTCTCCACGTTCGCATCCGTGCAATTATTCAGGTCTGTGAGCTTGCAAAGACGAAAAAATTTGAAGAGCATGCAGTAGAAGCAATCTGCCAATCAGTTGGTGACTTGATACAGCCCGAACAGCCAGTAGAAGCTCGACATCACGTTCTGCAGTTACTAAAGGCCATTATTGTGGGGCAGGGTGAAAGACTTGGCGTCCTTCGTGCCCATTTCTTCCGAGTCATAAAAGAGTATCCTATGAAT…
ENSXETG00000037785	nipsnap2	0.18458430944429013	nipsnap homolog 2 [Source:NCBI gene;Acc:733910]	ATGGCGAGCAGAACCATGTTGGTGGCTTTGAGTAGGACAAGCAGAGCCCAGGCCTGCGGGCTGAGACCTTTGGCAATCAGGGGTCTTGCATCATCGAGTCAGAAAGCCAGAGAAGACAGCTGGTTGCGATCACTCTTTGTTCGTAAAGTCGATCCACGGAAGGATGCTCACTCAAACCTTCTGGCCAAAAAGGAGATCAGTAACCTGTACAAAATTCAGTTTCACAATGTAAAGCCAGAGTGCCTGGAATCATACAATAAGCTTTGTGAAGAGGTGCTGCCAAAGATTCATGCAGATGAAGACTATCCATGTACTCTGGTGGGAACCTGGAACACATGGTATGGAGAGCAGGATCAGGCTGTTCACCTGTGGAAATATGAAGGTGGATATCCAGCCCTG…
ENSXETG00000019065	rwdd4	0.1787893404497948	RWD domain containing 4 [Source:Xenbase;Acc:XB-GENE-942899]	ATGGCTGCTAACGAGGATCAAGAGATGGAGCTGGAAGCTTTGCGATCAATTTATGAAGGGGACGACAGCTTCAAGGAGCTGGGACCTACATGTTTCCAGTACCGGGTTGGTGACAACGGTGATTCCAAAGCCTTCCTTATTGACATATCCTGGCCCGAAACGTACCCAGACGGCCCCCCTACCATTTCAATGAATGCATTTTTTAATAATCAGATCTCTCCAGCTGTTAAGCAAAGTATACTAAGCAAGTTACAGGAGCAGGTAGATGCCAATCTTGGCACAGCCATGACTTACACACTGTTTGAGTTTGCCAAAGACAACAAAGAAGATTTAATGGAAAACCACCAGCCCCATAGCAATACCAATGCACCGGGAAATGACATCACAGTAGAGACGGCA…
ENSXETG00000009839	atp10d	0.3257214703122846	ATPase, class V, type 10D [Source:Xenbase;Acc:XB-GENE-1000388]	ATGGCAGATCCTTTCCAGTGGGTACGTTACAGATGGCAGCGTTTTATGTCTGGAGATAGCAGGAACAGAGACCTAGAAGATTCCTCAACATCAAGGAAGTTACTGGGATTTAATAAAAGTAATGGCACCTCATCAAATTCTACCAAACACAGGGTTGTTATCCCATGCTTGGGCCAGTTTAAGGAAGAGTATGAGAAGTTAACCAAAGCCTACAAGAACAATCGAATACAGACTACCAAATACACTCTGCTTAACTTCATTCCGAGAAACTTATTTGAGCATGTACTTTCAATTCCTTCTGTTTTTAATCTTTTTTTTTCTTTCCTTTTTGAAAGAGCGGCCAACCTGTACTTCCTCTTCTTGGTCTTTCTCAATTGGGTACCACTGGTGGAAGCCTTC…
ENSXETG00000000790	dtd1	0.10275043455225483	D-aminoacyl-tRNA deacylase 1 [Source:Xenbase;Acc:XB-GENE-958228]	ATGAGAGCTGTCATTCAAAGGGTCACTAGGGCCAGTGTGACTGTCGGAGATGAGCAGATCAGTTCCATTGGGAGAGGCATCTGTGTCTTGTTGGGTATATCAGTGGAAGATACCCAGAAAGATATTGAGTATATGGTGCGGAAGATTCTGAATCTGCGTGTGTTTGCGGATGAGAGTGGAAAGCAGTGGTGCAAGAGTGTAATGGATAAGCAGTATGAGGTGCTTTGTGTGAGCCAGTTTACCCTGCAATGCGTCCTTAAAGGAAACAAGCCAGACTACCATATGGCTATGCCTTCTGAGCAAGCAGAGCCTTTCTACAATGTCTTTTTACAACAAATGCGGAAAGCCTACAAACCAGAACTCATTCAAGATGGAAAATTTGGTGCCTACATGCAAGTG…
ENSXETG00000036901	gtf2f2	0.3392499484607112	general transcription factor IIF subunit 2 [Source:NCBI gene;Acc:394584]	ATGGCCGCCGAGAAAGGGGATTTGGACCTGAATGGAGCAAAACAGAATACCGGAATGTGGCTTGTCAAGCTCCCAAAGTACTTGGCCCAGCAGTGGGCAAAAGCAACCGGCAGAGGAGAAGTTGGAAAGCTGAGAATTGTTAAAAATCAAGGAAAAACAGAGGTGTCCTTTACCCTTAATGAAGAACTTGCAAGCATTCAGGATATTGGAGGAAAGCCAGCATCATCCTTAGTCACTGCACCCAGGGAACATCCGTTTCTGCTACAGTCTGTGGGGGGACAAACTCTCACAGTGTTTACTGAAAGCTTATCAGGTCAATCTGATGACAAATCTGAAAACCGGGTTATAGATAAACTTGCTTTGGAGGGTATTGTGGTGCATCGTGCTGAGTGTAGACCA…
ENSXETG00000021497	epb41l4a	-0.04615948469375178	erythrocyte membrane protein band 4.1 like 4A [Source:Xenbase;Acc:XB-GENE-953979]	ATGGGTTGTTTCTGCGCCGTCCCGGAGGAATTCTATTGTGAAGTTTTGTTACTGGACGAGTCCAAGTTGCCTTTAACCTGCCAACAGCAAGGGGTGAAGAAGTCAACGAAAGGCTCTGTTGTCCTGGACTACGTGTTCCGTCACCTAAATCTCGTGGAGATAGATTACTTTGGGCTACGTTACTGTGACAGAAATCATCAGACGTATTGGCTGGATCCTATGAAGACAATTTCAGAGCACAGAGACTTGATCAGTACTGGACCTCCCTACACTCTGTATTTTGGTGTTAAATTTTATGCTGAAGATCCTTGTAAACTGAAGGAAGAAATAACAAGGTATCAGTTTTTTCTACAAGTGAAACAGGATGTTCTTCAAGGACGCTTGCCATGTCCATTTAAC…
ENSXETG00000006863	has2	0.06199864204274971	hyaluronan synthase 2 [Source:Xenbase;Acc:XB-GENE-5775581]	ATGCACTGTGAACGGTTTATATGCATCCTGAGAATAATTGGGACAACTCTCTTTGGAGTCTCCTTGTTACTTGGAATCTCAGCTGCTTATATTGTTGGTTACCAATTTATCCAAACAGACAATTATTACTTCTCATTTGGCCTTTATGGGGCAATTTTAGCCCTCCATCTTATCATCCAAAGCCTTTTTGCCTTTCTGGAACACCGAAAAATGAAAAGATCTCTAGAAACCCCCATTAAGCTGAACAAATCCGTTGCCCTATGTATTGCTGCATATCAGGAGGATCCCGACTACTTACGGAAATGTTTACTCTCGGTCAAGCGTTTGACATACCCAGGAATGAAAGTCATCATGGTGATCGATGGGAACTCGGACGACGATCTGTATATGATGGATATC…
ENSXETG00000001734	ube2ql1	-0.34659004626125006	ubiquitin conjugating enzyme E2Q family-like 1 [Source:Xenbase;Acc:XB-GENE-6073410]	ATGGCTACTCTGCTGCGGAAAATAGGGCTGATTCGTCTTCATGATAGGGATACGGAAGACCCTAAGCATCATCATCATCATAATCGCAGCCAGCAAGGGTCGCTGAAGGGTAGCAAGGGAAAGCACAGCAGCAACAAGCAGCAGCAGCAGCAGCAAGGAGGCTCAGCAGGAGGAGGTGGTGGTGGGAGTTGTGGGGGAGGCAGCAGCGGCTGCTGCAGCAGCAGCAATAACACAACAACTACTGATGGGATCCTTGGCCAACCTGAGATCAAGGGCAAAAAGGCTGAGCAGGCCCACAAGGACAAGCACTGTATAGCTGGGGGTAAAGAAAAGAGTAGCGCTAGAGAGACGAGCACCCCGACCATCACTAAGGAGTCCAAACAGCAAGGAGGTGTTGCG…
ENSXETG00000034805	erbb4	0.714770815785934	NA	ATGGGAAAGACCAAAGAGCTGTCCAAGGATGTCAGAGACAAAATTGTAGACCTGCACAAGGCTGGAATGGGCTACAAAACCATTAGCAAGAAGCTGGGAGAGAAGGTGACAACTGTTGGTGCGATTGTTCGAAAATGGAAGGAGCACAAAATGACCATCAATCGACCTCGCTCTGGGGCTCCACGCAAGATCTCACCTCGTGGGGTGTCAATGATTCTGAGAAAGGTGAAAAAGCATCCTAGAACTACACGGGAGGAGTTAGTTAATGACCTCAAATTAGCAGGGACCACAGTCACCAAGAAAACCATTGGAAACACATTACACCGCAATGGATTAAAATCCTGCAGGGCTCGCAAGGTCCCCCTGCTCAAGGCGGCACATGTGCAGGCCCGTCTGAAG…
ENSXETG00000036064	NA	0.72003634170183894	NA	ATGGGAAAGACCAAAGAGCTGTCCAAGGATGTCAGAGACAAAATTGTAGACCTGCACAAGGCTGGAATGGGCTACAAAACCATTAGCAAGAAGCTGGGAGAGAAGGTGACAACTGTTGGTGCGATTGTTCGAAAATGGAAGGAGCACAAAATGACCATCAATCGACCTCGCTCTGGGGCTCCACGCAAGATCTCACCTCGTGGGGTGTCAATGATTCTGAGAAAGGTGAAAAAGCATCCTAGAACTACACGGGAGGAGTTAGTTAATGACCTCAAATTAGCAGGGACCACAGTCACCAAGAAAACCATTGGAAACACATTACACCGCAATGGATTAAAATCCTGCAGGGCTCGCAAGGTCCCCCTGCTCAAGAAGGCACATGTGCAGGCCCGTCTGAAG…
ENSXETG00000033809	etv3l	-0.3914488171380928	ETS variant transcription factor 3 like [Source:NCBI gene;Acc:100493025]	ATGAACTATGACAAGCTGAGCCGAGCGCTAAGGTACTACTACAATAAGCGGATCCTGCACAAGACCAAAGGCAAGAGATTCACCTATAAATTCAACTTCAGCAAGTTAATCTTTGTCAACTACCCCGTGTGGGACGTGCGCTGCCCTCCCCAGCCTGTTCTAATGGGGAGCAATGTCTGTCGCTCGCCTGTAGTGCCCCCTGGTGTGCAGAGAGAGGTCCTACAGAACACCTTCCTGGCCCACAAGCTGCTGGCCAACCCGCTGACGTGCCGCAGAATGATCCCCAGCCTGATGGATTATGAGAGGTGTCTAGAGAAAAAGTCACCAAGCATTGGGCGCTGCAGTCCTGCCACATGTTTGTTGGGCCCCTACTGCCATTTTGGCCTGAATGATGGAACC…
ENSXETG00000028017	NA	-0.0288706325813807	NA	ATGTATAAACATTTTAATGCCCACCTTAAGTTTAATACTATTTTCTTTACAGATGTTGCTACCAAGGTGGCCGAAGAAAACTGTTCTTTCCTAACCATAACTGTGGGACTCAACAGCATGCAAGTGTCATGTGACCTCCTTCCTAAACCCGAAGATGGAGCTGTCTTCATTTCATACAAGAACCTCGGCTCCAGGTTAAGTGGGAGTTTTCTCAAGTTATCAGAGGACCCTGAGGATAATAACCCTGCTGTAGTTAATTCACAAGTGGTGACTGGAGGCATCACAAGCCAAACACGGGAAAACCTTAACCCCCCGGTGTCTTTCTACCTGAATAATCTGCAGGCCCCAGACTCCTTCCATATATCTTTGTGTGTATACTGGGATCCCAAGCTGAGTGGT…
ENSXETG00000021480	pik3r1	0.07313981820260004	phosphoinositide-3-kinase regulatory subunit 1 [Source:Xenbase;Acc:XB-GENE-6067221]	ATGAGCGCGGAGGGATACCAGTACCGGGCCCTGTACCCGTACAAGAAGGAGAGGGAGGAGGACATCGACCTGCGGGTAGGAGATACCCTCACCGTTAGCCGTGCCACGCTGCTGGCTCTGGGCTGCTTGGCCGAAGGAATGGAGGCTCGGCCCGAGCAGATCGGCTGGCTCAATGGATGCAACGAGAACACCGGGCAGAGAGGGGACTTCCCGGGCACCTACGTGGAGTATATTGGTCGGAAGAGGATCAGCCCCCCGACCCCCAAACCGAGGCCCCCTCGCCCGCTGCCTGTGGCTCCAGGGGCGGTACGTGGGGAGGCAGAGGCGCAGGCTTTTACACTTCCTGACCTGACTGAACAGTTCTCACCACCTGACACAGCCCCTCCAGTCCTTATCAAG…
ENSXETG00000040253	rasgrp2	0.0022973410085110613	RAS guanyl releasing protein 2 (calcium and DAG-regulated) [Source:NCBI gene;Acc:101733706]	ATGGATTCATCTGGTTTTGATAAGGGCCTCACCATTGATGAAATAGTGGCGAAATGCATCCAGAGCTTTGATAAGGATGGAAAGCTATCAGATCCAGAATTGGTCCAGATGTTTTTGATGATGCATCCATGGTATATACCATCTGGCGACCTTGCTAAAAAACTCTTTAGGATCTGTCAACTTGTGAGATTCTGGATATCTGAGTTTCCTGCAGAGTTTGATCTCAACCCAGAACTTGGGGAGCAAATCCGAGACCTAAAGAGAGCACTGGAGAACAAAGGAAACAGAAGAGAGAGTAACCTAATAGACATCGAGAGTGTCCCATCCTATGGATGGAAGCGACAGGTGACACAACGGGGCCCAAGTGGCGGCAGAGTTCGAAAGACATCCTTGTTGTTT…
ENSXETG00000002573	cdc16	0.3041196801741185	cell division cycle 16 [Source:Xenbase;Acc:XB-GENE-5755167]	ATGCTAATTAGGATTTGGATTCAGTTCAGCCAGGACCGTGGATTCGGCCGAATCCGAACCCTGCTGAAAAAGGCCAAATTCTGGCCAAATACCAAACCGAATCCTGGATTCGGTGCATCCCTAGTAAACAAAGAGCCACAGGATATTTACTGGCTGGCACAATGTCTCTACTTAACTGCTCAGTATCATAGGGCATCTCATGCTTTAAGGTCACGTAAACTGGACAAAGTACATGAGGCATGCAGATACCTTGCAGCACGTTGTCATTATGCTGCAAAAGAGTACCAGCAAGCTCTGGATATACTTGATATGGAAGAACCAATCAACAAGAAATTATTTGAGAGGAGTCTGAAAGAAGATCTAAAGGAGCCATCAGGAGAATGGCAGATGTCACAGTCT…
ENSXETG00000007745	ids	0.20285590604170464	iduronate 2-sulfatase [Source:Xenbase;Acc:XB-GENE-972154]	ATGAATTTGTTTGGATACCTTCGTTTCCTGATGTGCGCCACCACTGTGTTTGCTGTCTGGCAACAGCCCTTTTTACCGAAACATACCGCTACAGGTGGAAAGAATGTTTTAATTATAATTGCTGATGATCTACGTACAAGTCTTGGCTGTTACGGTGACAGTGCTGTGAAATCACCAAACATCGATCACCTAGCATCACAAAGTATAATATTTACAAATGCATATGCACAGCAAGCAGTGTGTGCTCCAAGCAGGGTGTCCTTCTTAACAGGAAGGCGTCCAGACACAACCAGGCTTTTTGACTTTAATTCCTACTGGAGAACACATGCTGGAAACTACACAACTCTTCCTCAGTACTTTAAAGAACATGGTTATGTGACAATGTCAGTTGGGAAAATC…
ENSXETG00000037086	smpd2	0.3859258210664165	uncharacterized LOC100492862 [Source:NCBI gene;Acc:100492862]	ATGCTGCAGCCGGGCCCCAGGCTCCTTCCCCTTGTGCTCCTCACAGCCATTCTCCATTGCTCAGCCAAGGAAGATGGCCCCATCCACGTGAGTGGCGCACTGAACCAATTTATCTTCTTGTCCAACTACCTGAGCTTGGAAGCGCCCGCCCAGCAAGTCACTTGGTTTTTTAACAACAATGGGACGAAGTCCAAGCTGGCGGAATACAAGAATCAGCATTTTGAGATCATTAGCAGCCAATTTACCGACCGGCTGGAAGAGTCGAACGATGGGACGACGTTAAAGATCAGTGACCTGAGCGTGGAGGACGGTGGAATCTACTCGGCCATCATTACTCTGGAGGATGAAGAGACAAAGGAGATTGCTTTTAATCTCACTGTGAGCGTCCCTCAAGAAAAA…
ENSXETG00000026404	med10	0.05434788835501311	mediator complex subunit 10 [Source:Xenbase;Acc:XB-GENE-950393]	ATGGCTGAGAAGTTTGACAACCTGGAGGAACATTTAGAGAAGTTCGTGGAGAACATTCGCCAGCTGGGAATCATTGTTAGCGACTTCCAGCCCAGCAGCCAGGCTGGTCTTAATCAGAAGCTAAATTTTTTGGTAACCGGCTTGCAAGATATTGACAAATGTCGACAACAACTTCATGATATCACTGTACCCTTGGAAGTTTTTGATTACATTGATCAAGGGCGCAATCCACAACTTTACACCAAGGAGTGCTTGGAAAGAGCTTTGGCTAAAAACGAGCAAGTCAAAGGGAAAATTGATACCCTAAAGAAATTTAAGAGTCTGTTAATTCAAGAATTAAGCAAGGTTTTTCCAGAAGACATGGCAAAGTACAAAGCAATAAGAGGGGAAGATCATCCT…
ENSXETG00000039273	NA	0.17749275764997244	uncharacterized LOC101730828 [Source:NCBI gene;Acc:101730828]	ATGGGCCGTGAGTCTTTTCTGCAAGAATTACAAGACTGCATAACATCTGCCAACAAGCAACTAGTGGTGGTTCATGGGGAGTCGGGTAGTGGAAAAAGCTCAATTATTGCCAAAATCGCTACGCTGGCTTCCCAGTGGATAGGAAGGGACATTAGAGTGGTGACAAGATTTATTGGTAGAACCGGAGAAAGTCGAAATCCCCGCATGTTGCTATACAGTCTTTGTTTTCAGATTGCAGAAATCTACAACATCACAATGGATTTTTCTGAGGACCTGAAAGGATTAATAAATGAGTTTTCCACGTTGCTGGAGTTTGCTAATAAATGTCGCCCTCTGATGGTAGCCGTGGATGGGATTGATGAGTTATCAGTGCATGAAGATAGTCTTTCCTGGATACCT…
ENSXETG00000010088	mrps17	0.4188553853585857	mitochondrial ribosomal protein S17 [Source:Xenbase;Acc:XB-GENE-5730000]	ATGTCAGCCATACGAGCTGCAGTCCACGCCAAATGGATTGTAGGGAAAGTCATTGGAACAAAGATGAGAAAGACCGCAAAAGTCAGAGTGACCAGGCTGGTGCTAGATCCTTACTTATTAAAGTACTACAACAAAAGAAAGACCTACTTTGCACATGATGCCCAACAGCAGTGCACCATCGGAGACATAGTTTTGTTAAAAGCGCTGCCAGAGAGGAGATCAAAACATGTGAAACATGAACTGTCTGAGATCATATTCAAAGTAGGGCGAGTGGAAGATCCCCTAACTGGGAGAAGGTGTGCTGGGAGCATGTACCTCGATAGTCTGACGACTACTGACGATTCAAATGTTGCAGACCTTAATGAACAGCTTCAGAGTCTGGATATTAAAGACACTGCA…
ENSXETG00000035680	kctd4	0.16972535631008792	potassium channel tetramerization domain containing 4 [Source:NCBI gene;Acc:100158517]	ATGGAACGCAGAATCAACAGAACAGACAAAGACTGTGATGATAAATGTCACAATTCAGAAGATGGAGACCCGAGTACAAACTGTAAAACATCCCTTGTCACTCTCAACGTTGGTGGCTATCTGTACATCACACAAAAACAGACTCTCTCCAAGTACCCTGACTCTTACCTTGAAGGTGTGGTCAATAGGAAAATTTTCTGCCCAATTGATGCAGACGGACATTACTTCATAGACAGAGACGGGCTACTATTTAGGCATGTTCTGAACTTTTTACGAAATGGGGAACTCTTGTTACCAGAGGGTTTCAAAGAAAACCATCTTTTGGCACATGAAGCAGATTTTTTCAAGCTGAAGGCACTTAATGCAGCTGTGAAAGCTAGATGGGAGAAAGAGCAGCAG…
ENSXETG00000006064	sult1e1	0.4664304152999301	sulfotransferase family 1E member 1 [Source:Xenbase;Acc:XB-GENE-5756033]	ATGGCTAAAATATTTTGTTTCCTTAGGATAAAAGATGAAGACTTTGAAGCAATTACGCGTGTTGTTTCCTTTCGAGGGGTACCAATGTCAAAATATAATGTAGAGAACTGGGAACGGATGGATTACTTTCAAGCCAGGCATGACGATGTAGTTATTGCCACATATCCTAAAGCAGGAACCACCTGGGTAAGTGAAATTATGGATATGATTTACGCTGGTGGAGATCTAGAAAAATGCCAGCGTGATGCCATATATAATCGCGTCCCATATATGGAGATCAGAGTTCCTGGAATGCCTTCAGGTGTGGATCAACTGGAGGTCTTGGCTTCTCCCAGGCTGATTAAGACCCACGTCCCCATCCATCTGATGCCGGAGTCCTTCTGGGAGAAAAACTGCAAG…
ENSXETG00000007744	tmem185a	0.061203847160437336	transmembrane protein 185A [Source:Xenbase;Acc:XB-GENE-972141]	ATGAATCTTAGGGGCCTCTTCCAGGATTTTAACCCCAGTAAATTTCTCATCTACGCATGTTTGTTGCTCTTCTCTGTTCTCCTCGCCCTGCGACTGGATAATATTATTCAGTGGAGTTACTGGGCAGTGTTTGCACCAATATGGCTGTGGAAGCTAATGGTTATTGTAGGAGCATCAGTTGGTACAGGTGTATGGGCACGTAACCCTCAATACAGGGCAGAAGGTGAAACATGTGTGGAGTTCAAGGCCATGCTCATTGCAGTGGGAATTCATTTGCTGCTTCTTATGTTTGAAGTTCTTGTTTGTGATCGTATTGAAAGAGGAAACCACTACTTCTGGTTGCTAGTCTTTATGCCTTTATTCTTTGTGTCCCCTGTATCAGTAGCAGCTTGCGTTTGG…
ENSXETG00000020611	adgre1	0.2704468771413434	adhesion G protein-coupled receptor E1 [Source:Xenbase;Acc:XB-GENE-6036068]	ATGTATAGTGACTGTATTTTGTGTTTATTTGCAGATATAAATGAGTGTCAGGAGAATGCAAACATCTGTGGTCCTGAGGCAGAATGTAAGAACACGATGGGAGGATACAAGTGTATGTGTGCCCATGGCTATCAGACAAAAGCAAACAAAACAGAATTCTGCCATAATGAAAACTATACTAAATGTGAAGATATAGATGAGTGTGATACAAACACCCACAAATGTGGCGCTAACGCAAAGTGTATAAATACAGAGGGAAGCTACCAGTGCCAGTGTGAGCGTGGATATCACTGGAAAGACAACACAACTAAATTCACTCCCACCGATAATAAGGAGCAAAATAAATGTGAAGATATAAATGAGTGTCAGCAGAATGCAGGCATCTGTGGTACTAAGGCG…
ENSXETG00000008263	cpsf3	0.508995167938098	cleavage and polyadenylation specific factor 3 [Source:Xenbase;Acc:XB-GENE-972322]	ATGTCTGTGAAAAGGAAAGCGGAGAGCGCTATCCCGGCCGAGGAGAGTGACCAGCTGCTCATTCGGCCCCTAGGCGCTGGTCAGGAGGTGGGAAGATCATGTATCATTCTGGAATTCAAAGGAAGAAAGATTATGCTGGACTGTGGGATCCACCCTGGATTAGAGGGAATGGATGCTCTCCCATACATTGACTTGATTGACCCTGCAGAGATTGATTTGCTCCTTATAAGTCATTTCCATCTGGATCATTGTGGGGCCCTTCCATGGTTCCTGCAGAAGACGAGCTTTAAGGGGCGGACATTTATGACCCATGCTACTAAGGCTATATACAGATGGCTGCTGTCAGATTATGTCAAAGTCAGTAATATCTCAGCAGATGATATGCTGTACACAGAGACA…
ENSXETG00000018917	gabbr2	0.19455630406406352	gamma-aminobutyric acid (GABA) B receptor, 2 [Source:Xenbase;Acc:XB-GENE-5815161]	ATGGCTCCGTCCCCGAGGAGGCGCTGGAACTCGCCGTGCGCTCTCCCTGGTGCTGAAACCCCACAAGCTGCTGGCGCTGGTGGTGCTGAATCCGCCACCGGCGTCTCACCTAAACCTGCCATTCAGATGCCAATGCTGCCTCCGCAATGCCTGCTGCTGGTATTGGGTTTGGGATTGGGACCTGGTTTCGTGTATGGATCAAGGGGCACGACAATCGAACAGCCTGCCAATGGCACTTCGCTATCCATCATGGGCTTGATGCCCCTCAACGAGACTGTGGCAAAGGGGAATATCGGCAGAGGCGTCCTGCCCGCAGTGCAACTGGCTATCGATCAGATCCGCAATATATCCCTCCTGCACCCTTACTTCTTGGACCTAAAGCTTTATGATACAGCGTGT…
ENSXETG00000022511	mthfd1	0.6974614189155961	methylenetetrahydrofolate dehydrogenase (NADP+ dependent) 1, methenyltetrahydrofolate cyclohydrolase, formyltetrahydrofolate synthetase [Source:Xenbase;Acc:XB-GENE-992132]	ATGCACATTATCAGCTTACCGGAGGCTTTATTTGGTAGTAAATCTTGTTTTTATTCAACCAAAACTTGCCACCAAGTCAGGAATTCAAAAATAACTACCTGGTTGGTCCGTGAGAGACTAAAAGCTGAAGTTGCTGCAATGAAGGAAAAGGTCCCTGGTTTCAGCCCTGGATTGGCCATTGTGCAGGTGGGAGACAGAGATGACTCAAATCTCTACATCAGCATGAAACTTAAAGCTGCTGCAGAGATTGGGATCAGTGCCAGTCATGTAAAGCTGCCGAAGACTGCCACAGAAGCTGAGGTACTAAGCAAGATAAACTCCATAAATGAGGACCCTAAATATCACGGGATGATTGTGCAGTTGCCTTTGGATTCCAATCATCCAATCAACACTGAAAAA…
ENSXETG00000020483	mxd4	-0.22900183039314265	MAX dimerization protein 4 [Source:Xenbase;Acc:XB-GENE-6257573]	ATGGAGTTGAACTCTCTGTTAATCCTTCTGGAGGCAGCTGAATATTTGGAAAGAAGAGATCGAGAAGCAGAACATGGCTATGCATCAGTTTTACCTTTTGACAGTGATTACTCCATGAAGAAAACCAAAGCAGCCTCCTCCTTATCTAGGAAATCTCAGAACAACAGGTCATCGCACAACGAATTAGAAAAACACAGGCGAGCAAAATTACGATTATATTTGGAGCAGCTAAAGCAACTCGTGCCTCTTGGGCCAGATAGCAACAGACATACTACTCTAAGCCTTCTGAAAAGAGCCAAAATGCACATAAAGAAACTAGAAGAACAGGACAGAAAAGCTCTCAATGTTAAAGAACAGCTTCAGAGAGAACATCGCTACCTCAAGCGCCGTTTAGAGCAG…
ENSXETG00000001008	psen1	0.21647833446723616	presenilin 1 [Source:Xenbase;Acc:XB-GENE-481916]	ATGCAGTACTTCCAATGTTTTGTAATAGATTACTCAACACTCAGTAGCGACAATCAACCCACAACCTCAGTTGTGGCATGTCTCTTTCAGAATGACACCAATGAAAGAAGAAGCAATGAGCACTCAGAGTCTCAGAGCAATGGGCAGACACAGAGCAGTTCCCAGCAAGTACTGGAACAGGACGAGGAAGAAGATGAAGAACTCACCTTGAAATATGGAGCCAAGCATGTAATCATGCTGTTTGTCCCTGTCACGCTATGCATGGTGGTGGTTGTTGCAACCATCAAGTCTGTCAGCTTTTACACACGCTATGATGGGCAGCTAATCTACACCCCATTCACAGAAGACACGGATAGTGTTGGACAAAGAGCTCTGAACTCCATACTCAACACAGCCATA…
ENSXETG00000004672	pagr1	-0.3962766705318557	PAXIP1 associated glutamate-rich protein 1 [Source:Xenbase;Acc:XB-GENE-5914139]	ATGGAGTCTTTGGCTGTAAAGGAAGGAGGAGAAGGGGAAGAGGAGGAGGAGGAAGAGGTGGAAGAACAGCAGAAAGTGGAAGAGGGAGAAGCAGAAGAACAGCAGGAAGAACATGGAGAAGAGGAAGAGGAGGGGGAAGCAGAGGAAGGGGAGGACTGGTGCATAGCGTGCAGTGATGAGGAGGTCGAGGAACCTGAGGGGTGGATCCCACCTCCGGAAGACATTAAAAAACTGTATGAGTTGTTGGCCAGCGAGGGAACGCTGCCTCTGCAAGTGGACATACTGCTTCGCCGGCCCCCCACCCCTGAACCCGACCCTCTGGATAACGAATCCGATCAGGAGGCAGAGGAGGAGGAAGAAGAGCAGGAGACGCCCAACATTCCCACTGAGTTTGATTTT…
ENSXETG00000038758	mapk14	0.16645294410254588	NA	ATGTGGCAGATACAGAATCTCAGTACCGGAACTACTTGTGTTTCATTTATTCCCATTAGTGAGAAAGGTAGGAAAGAGTTAGTTTGTGATGGGGTCGGGGAAATGAACGCAGCCAAATTTATTGCCATAGATAGGCAGCAGAAGCCAGGGAGGAAGCACTTTATAGATAGTAACCGATCAGCTTTGATTGACAGAATGTCCGTCCCCACCATTAATGCTGTTCTGGATGAGCTACTGAGCGAGGAGATCCTGAATGATGAGCAGTACAGCACTGTGAGGAGCAAGAAACTCTCCCAGGAGAAGATGAGGGAGCTTTATAGCTATGCCAAGTCCTGGAGGCACCAGGATAAGGACATGTTCTTTTCCCTTCTGTTAAAACACAATAACTCACTTGTCATG…
ENSXETG00000014661	tpt1	0.7748172924498451	tumor protein, translationally-controlled 1 [Source:Xenbase;Acc:XB-GENE-854747]	ATGATCATCTACAAGGACACCGTCACTGAGGATGAAATGTTCTCCGATATCTACAAGATCGCCGAAACCCCCGACGGCATGTGTTTTGAAGTGGAAGGGAAGATCATCCAAAGAGTAGAAGGTGCAATTGATGATGCGCTTATTGGTGGAAATGCTTCAGCTGAGTGCCAGGAGGAGGACATCGGTGGTGCAACAACAGTCAGCGGGGTGGACATAGTGATTAATCACAAACTTCAAGAAACTGGTTTCACCAAGGACTCTTACAAGAATTACATTAAGGATTATGTAAAACTAGTCAAGGCCAAACTTGAGGAGACTGATCCCGACAGAGTAAAACCCTTCATGAAAGGAATTCAAGATAGAGTAAAACTCATACTTGGAAACTTCAAAAACTATCAG…
ENSXETG00000019052	ing2	-0.3160913011976833	inhibitor of growth family member 2 [Source:Xenbase;Acc:XB-GENE-951849]	ATGTTAGGGCAACAACAGCAACACTTGCACTACTCCCCGGGGAGCTCGGCGGCGGAGGACGGCCAGCTGGTGAGCTATGTGGAGGAGTACTTGGAGTGCGTGGAGTCGTTGCCGTTGGAAATCCAGAGGAGCGTCACTTTGCTACGGGAGATCGATAGCCAGTACCGGGAAGCTCTAAAAGAAGTTGATGATGTTTTTGAAAAACATTCAAATGAAACTGATGCTAATCAGAAAAAGCGACTCTTGCAGCAGCTTCAGAGAGCCCTCATTGTGACCCAGGAGCTTGGCGATGATAAAATACAGCTAGTTACCCAAGTGTTTGAGTTGATAGAGAACAGGACGAAGCAAATGGAATCTCTCTGCCAAGGCTTCTTTGATCAAGAAGAGAGTGAAAAGTCT…
ENSXETG00000000793	slc24a3	0.3430935887870761	solute carrier family 24 (sodium/potassium/calcium exchanger), member 3 [Source:Xenbase;Acc:XB-GENE-958238]	ATGACTAGAGTAGCGCCGGGCACGGATATGGCAAAGTACAGCAAGGAGGTCGTGCTTGGTGGTTGGACTCAGGGAGAGCAGCGCCTGTACTCTGCCCACAGAAGGATGGAGCCCGCAAGGCAATGGAGGGGCAAAACTCGCAGGAAAAGGAAGGAGCTATTTTTTGGGCAATTGTGTTTTATGGGCTGCCTCCTGCTCATTGGCTCGTCTTTTTCCCAGTGGACCGAGGCATCTGGTTATAAAAGCATTGACTATTTTGACAATGACCTAAACAATGCAGTAGAAGCCAGTGACAAGTGGAGTGGACGTGGGATACTCTGGTCTAGTGATGAAAATGTGACTGAAAGCCAAAGAGAGACCAAACATCGCAAGAATTGCACAGAACCAGCTCTTCATGAA…
ENSXETG00000012212	hsd11b1l.2	0.2107553328206516	hydroxysteroid (11-beta) dehydrogenase 1-like, gene 2 [Source:Xenbase;Acc:XB-GENE-5834068]	ATGGCTGGGGTAAAATTGGTGCTTCTGTCTCTGTTTGTTGGGTACACTGTTAATTACTTCTATAGATCTGAGTCCATGAACCCAGAATTAGTTCGTGGGAAGCGTGTACTAATAACAGGATCCAGCACTGGGATTGGAGAGCAGATTGCTTATGAATTTGCCCAGATGGGTGCACACATAATGCTTACAGCTAGAAGACATCAGCGTTTGCAGGAAGTGGCAAACCAATGTTTGAAGTTAGGAGCTGCCTCTGCAGACTATGTGGCCTCTGATATGGGAAACTTGACATCAGCGCAGTACGTAGCACAAGAAACAGTGAAGAAGCTTGGGGGCTTGGATTACTTGGTTCTGAATCATATTGGAGGATCTGCATCATTTGGATTTTTCAAAGGTGACATG…
ENSXETG00000021591	mcam	0.27126902137282227	melanoma cell adhesion molecule [Source:Xenbase;Acc:XB-GENE-1002617]	ATGGGTTTAACTTGGTTTGGTAGTGCAAAACTGTTATGTGGGCTCTTTGCAGGTGCTTTGGGGCAGCCGGATGGTTTACTGCAGGTTAAAGCAAAAGTGAGTGAAACCATTAAGTTGCCATGCAGTTCATACAAAGATGGAGAGTCCAACAACAAAACCCTGGAGTGGCTCAGTAAAAAAACTACAGAGAAGGTGATTTATCGCAGGGGTCCCAATGGGCTCACTGTTCCTGATCCTGAGCTGAAGGAGCGAATGAGTGTGGATGAGCACTTCACCTTAGAAATAACAGATGTCCGTGTCCAAGATGAAATGATATTTATCTGCCGAGTGGTAGATACCAGCACCAAAGAAGATGCTGTACAGTTACTCGTTTTCAAGGCACCAGAATCTCCAGAGATC…
ENSXETG00000034665	NA	0.19197035478555477	NA	ATGGAAGAAGAGATCGAAATTTCCTTGAAACCAGGTTCGGAAACAGAAACCAACTCAGTATGGGGCGCTACAGTGAGGAGAGAGGATCTTGGTTCAAGGTCACAGGAGGCTTCTGGCATAAAGCACTTTATAGATAGTAACCGTTCAGCTTTGATTGACAGAATGTCTGTCCCCACCATTAATGTTGTTCTGGATGAGCTACTGAACGAGGAGATCCTGAATGATGAGCAGTACAGCACTGTGAGGAGCAAGAATATCTCCCAGGAGATGATGAGGGAGCTTTATAGCTATGCCAACTCCTGGAGTCACCAGGATAAGGACATGTTCTTTTTCCTTCTGTCAAAACACAATAACTCACTTGTCAAGGATCTCATGAAATAA
ENSXETG00000036927	NA	0.39010454167988007	NA	ATGGCCAAGCGGGTGAGCATTCTGGATCAGCACAAGAAGCCGTCCTCGGCCCGGGTGCGTGTTGCCGTCAGACTGAGGCCCTACATGGAGAAAGAGGATGAGAAAGCGCCCGCCGCGTGTGTCCGGGGCCTGGACTCGCAGTCGCTGGAGATTGTCAACTGGAGGAATCAGCTAGAGACCATGCAGTACCAGTAA
ENSXETG00000006328	adsl	-0.059672339651237444	adenylosuccinate lyase [Source:Xenbase;Acc:XB-GENE-1001539]	ATGGACGGGAGCAGCGGGTTAAGTGGGGAGAGCAATCCCCGAGTTACGGGCAGCGTGTCCCCGCTGACTCCCGGGCCCGAAGAGGTTATGAGGTATAGGTCGCCGCTGGTCTCCAGGTACGCCAGCCGGGAAATGGCCTTCAATTTCAGTGACAGCAAGAAATTTCAGACGTGGAGACGGCTTTGGTTATGGCTGGGGCAGGCCCAACGGAGTTTGGGGCTACCCATTACAGAAGAACAGATCCAGGAGATGGAGGCCAACCTGGAAAATATTGACTTTAAGATGGCAGCGGAGGAAGAAAAGCGCTTGCGGCATGATGTTATGGCACATGTACACACGTTTGCACACTGCTGCCCCAAAGCTGCCCCAGTCATTCATCTCGGAGCCACTTCTTGCTAC…
ENSXETG00000002388	poln	-0.2217494581669685	polymerase (DNA directed) nu [Source:Xenbase;Acc:XB-GENE-988834]	ATGTCAGCCTTAGAGCACAATACAAGCTTGTTTCTAACGTGTCTTTCTTCTTTGCTGGTAAAGTCTAATATTCTTGATAGAGAAGTAGTATATATTGCAGAGTTCTTAAACAGTAACACTCTTGTAATACAAAAAATAAATGTTGGCTCAAATTTGTTATATATCCCATTTTATAGGAATTTGCTCTCCCTTGTACTGCAAATGAACACAAATGTAATTTGCTTCAATGCCAAAGATTTTCTTCGGACAGTCCTTCTTGTCTATGGGGAGAAAGAAAGCTGGAAAAGAGTTACAAACAGCATTGTGCTGGACCCCAGAATAGCGGCGTGGCTCTTAAATCCAGCAGACTATAACCCATCTTTTGAAGATTTGGTCTGCAAATATTGCACAAATCCGGAC…
ENSXETG00000004675	maz	-0.09569368158793179	MYC associated zinc finger protein [Source:Xenbase;Acc:XB-GENE-1021005]	ATGGATGCAAATTGGAGCAGTTTTATATTCCAGACCCCTCCTCCCCCCCCTGCGGAGCCGATGCAGGTTGAGCTCTTGCCAGTCTTAGCCACTGTTACAGCGTCCCCAGATGGAACCCTCCAGTCTCAGACGATGGTGCCTACTTTGGCCACCCAGCACCCCTCAACTGTGGATGCAGCTGCTCTCAAGCAGGAGGTGACCAGCATTCCTATCTCCCAACATATTACTTCTATTACCTCGGTTGGCCACAACCAGTCCTCTCTCTGTACTGCCCTGCCATTGCAGCCCCTCATGGAACTCCCGAAGAAATCCAAGAGTCGGGGCCCTTATATCTGCTCTTTGTGCTCTAAGGAGTTTAAGAACGGATACAATCTAAGGCGACACGAAGCCATTCACACT…
ENSXETG00000012902	dnajc8	0.2812108124691449	DnaJ heat shock protein family (Hsp40) member C8 [Source:Xenbase;Acc:XB-GENE-946546]	ATGGCGGCTCCCGGGTCTGGCGGTCCGTCCGGTTCAGTGGATGATCTGTTTTCGACGTTTTACACCGAGGTTAAGCAAATTGAAAAACGTGATTCTGTATTAACCCCAAAGCAGCAGATAGAAAGACTGATTAGACCTGGGTCATCCTACTTTAACTTAAACCCTTTTGAGGTCCTTCAGATTGATCCAGAAGTAACAGATGAGGAAGTCAAGAAGAGATTTCGACAGTTATCAATACTTGTGCACCCGGATAAAAATCAAGATGATGTTGACAGAGCCCAGAAAGCTTTTGAAGCTGTAGACAAAGCCTATAAGAGTCTCCTAGATCCAGAGCAGAAAAAGAGGGCGCTAGATGTCATCCAAGCTGGATATGAATATGTTGAGCATATTGCAAAAGAA…
ENSXETG00000031529	ppwd1	-0.1381856084148924	calcitonin receptor [Source:NCBI gene;Acc:100491101]	ATGGCTATAGTAGGACATGCCTTGTCTATTGTTTCATTGATGATTTCCCTTGGAATATTCTTCTATTTCAAGAGCCTGAGCTGCCAGAGGATAACCCTACATAAAAACTTGTTTACCTCTTATGTTTTGAACTCAGTGTTTACAATTGTCCATCTTACGGCTGTAGTACCAGATACAGATCTTGTGAGGAGTGATCCTGTAAGCTGCAAAGTGCTCCAGTTTTTTAGCCAATACATGCTGGGATGTAACTATTTCTGGATGCTTTGTGAAGGAATATACCTCCATACACTGATAGTGGTTGCAGTCTTTGCAGAAGAGCAGCATTTACATTGGTATTATCTGCTCGGCTGGGGTTTCCCCTTAGTGCCTGCATCTATTCATGCGTTTGCAAGAACAAAG…
ENSXETG00000019049	cdkn2aip	0.1948073491034424	CDKN2A interacting protein [Source:Xenbase;Acc:XB-GENE-984876]	ATGGGGTCTGAGTGCGAGGTGAGCGAGTTCCTGGGCCAGAACCCTGAGACTGCCGCCTGGCTGGAGCGTGTTCGCGGGGAGTGCGAGTCGGACAAGTGGTGGCAACACCGCAGGGAATTCATTCTCCGGAACCTGCGCGATGTGTGCGGGGAAGGAGAGATCCCGCCACTGCCTGAGACCAACCACAAGGAGTTGGACCGGCTTCTTGCCTACTCCATGGCGTGGGCCAATCATGTCTTCACGGGCTGCAGGTACCCCCTTCCAGTTATGGAAAAAGTGCTTAAAATGGCAGAAAATATTAAGGTGACTGATGCACCAACCCATACAACACGTGATGAACTGGTTGCCAAGGTGAAGAAAAGAGGGATTTCAAGTAGCAATGAAGGGGTAGAAGAGGAG…
ENSXETG00000034762	cenpk	0.41037754376793445	aconitate decarboxylase 1 like gene b [Source:NCBI gene;Acc:100125311]	ATGTTCTCAGCCACCTTGCAGAATTCCAAGAAACTTCAGCAGATATGCAGACAGCTCCACAGCGCTGCTTTAAAAGTCGCTGTCAGTCCTCAGTATGAAGAATCTGTCACAAGCACTTTTGCCTCATTCATCACTGACATTCGCCCTGAGCACCTCTCAGAAGTTGTACGGCACAGAAGTAAGCGCATGATCCTGGACAACATCGGAGTCGGCCTCGTGGGCACAACCACTCATGTGTTCGACATTATTCTGCAGTACTGCCAGGATTTGCACTCTTCTGGATATGGGAAAGCAGCTGTTAGCTCAGTGTATGGAAGAAAGGACCTAATGCTGTCACCAACCCTGGCTGCCTATGTCAATGGAGTTGCAGTTCACTCCATGGACTTCGATGACACCTGG…
ENSXETG00000017701	ttc27	0.20253833261524576	tetratricopeptide repeat domain 27 [Source:Xenbase;Acc:XB-GENE-952006]	ATGTGGGTTGCATTGGAAAAGGATGTCCTCAGGGGCTTCCGAGCATCATCTCATGTTGACCAAGATCAAAGACCTTCAGATACAGAAATTGAAGCCCTCTTGCAATCGCTGTTTGAGGGCAACTTTGAAAGCATTCTGCTTTCTCCACTCATAATGGAAATGTTCACTGCACCAGTCCCAGAGGAGAATATAGAAATTTATTTGGTACGACAGATTTCTGCATTCTTAGATGGACCAGCTGATGTTCAAAACAGACAACTAATGGTGTTCCTGCTTGGAGTAAGCTGTCTTCACCTTTTTGTTCAAAGCAACTGGACAGGTCCTCCCATCATTTCAATACCACAGGACTTTTTACCATCTTCTCTCTTTGAACATTTTTCAGAGCAAAAAGCGGTGTCT…
ENSXETG00000038595	NA	0.2528996436031067	NA	ATGTCGCATCAGCAAATCAGTATCCTTGGGAAGGAGGATTTTGTGGAACCAGTGCTGGGAACTAAGCTGCTCCCGAAAATACCCTCAGTCAACAAATATGAGAGCAGGGGGCCTCCAGATCCAAGGGATATTGACATGCAAAGTAAATTCAAAAGGTACCTGAGCTTTAAGGATGTGTTTGGTATGTTTTATAGGCTCCGTTTTACATCAAGAGAAAATAAGCTGGCCAATGCAGGTTTCTACTATGTGGGCCCCAGGGACCGTGTGCGGTGTTTTTCGTGTGGGGGTCAGTTGGAGATGTGGGAGGAATGGGATTTTCCTCTCACCCGTCACCAACAAACCTTCCCTGAATGCCCCTATCTGCAGGAGCTGAAAGCCAAGGGGGAATGGAAAGATTAT…
ENSXETG00000012899	lrrc8a	0.10343699736837916	leucine rich repeat containing 8 VRAC subunit A [Source:Xenbase;Acc:XB-GENE-1012024]	ATGATTCCGGTAACAGAGTTGCGGTACTTTGCTGACACCCAGCCGGCTTACCGTATCCTCAAACCATGGTGGGACGTCTTCACGGACTACATCTCCATCGTCATGCTTATGATAGCAGTGTTCGGGGGCACCCTGCAGGTCACGCAGGACAAGATGATCTGTCTTCCGTGCAAGTGGGTCACTCATGACTCCTGCAATGATTCCTACCGGGCCTGGAATGTGCCAGAGACAGATCTCTATACAAATTCTACCCTGTCACCTCCACTTGCACCAGGACCCACAGGTATTAAATATGACCTGGATAGGCATCAGTACAACTATGTGGATGCAGTGTGCTACGAGAACCGCTTGCACTGGTTTGCCAAGTACTTTCCCTACCTTGTCCTGCTGCACACGTTG…
ENSXETG00000006053	slc25a45	0.06071279944543759	solute carrier family 25 member 45 [Source:Xenbase;Acc:XB-GENE-1006763]	ATGCCTGCTGCTGAATTCATTGCAGGATGGATTTCAGGTGCACTTGGCTTGGTTGTTGGACACCCAGTAGACACAGTTAAGGTACGCCTGCAGACACAATCAAGGTACCGTGGGATTCTGGACTGTGTCATTCAAACATACAGGAATGAAACGATTTTTGGATTTTTTAAAGGTATGAGTTTTCCAGTAGGAAGTGTGGCAATTAGTAACTCATTAGCATTTGGATCGTATAGTAATGCTTTGCTGTACCTAAGCGATCAAGAGATTAAAAACTGGAAGAATCCACCGCATAATTGCCATGTTTTTATGGCCGGATGCTTTTCAGGAATTGTACAACTTTCTTTTTCGGCTCCAGTTGACCTTGTAAAAGTTAGGCTTCAGAACCAGACGGAATCTTTT…
ENSXETG00000036154	srek1ip1	-0.13778031386102535	NA	ATGCAGTGGTTTTGGGATTTCTCCACCCTAAAGCTGGGGCCTTGTGACAGCAAAGAGCATCAAGCCTGGACCTGTGATAAAATGGGCCACTTGGTTCTCCAGCCCCACGGACTCTACCTAACGGCAAAGCCCGAGTCCAAGAAGGTATTTGTGTCCAAGGGGAGGGATAAATTCAGCAAATGGAAGACGGAGTTGAATGCCCCAGTCTGCAAGGGCTTCATCAAACCTTCTGAGCCCCTCGAGCCAAGCAAGACCCCCGAAATGGACACTGTCACACAACTGGCGTATGGATGTAAGCAAAACCAGCCAAGTATGGCAGCTCCTCCCTGGTCTTCCCCTCACACACTTTCTCCTCCCCTCACAGGTAACAGCTGGAAGGCGGCCATGTTGGTCCTGAGC…
ENSXETG00000013218	ift43	-0.011705714743158208	intraflagellar transport 43 [Source:Xenbase;Acc:XB-GENE-5909249]	ATGGAGGATGTGTTGGACCTCGGGGAGGCTCCGAGCCGGAGAAGTGGGGTAAAGATGGGACGTCGAGCACGTGCATCTCAGGAAAATCAGCAGGAAACAGCTGATGCGTCACGGAACCAGCCTGGAAGAGAGGGCCCACCTAAACCTTTGCGGCAAGGAGGATGGGCAGATGACTCTTCTGGTCCATCAAAGTCAACAAAGCGAATGACTGAGGATGTTGAAGACAGCCGCCTGAAGCAGCAAAGCCTGGATGAGTCAGATGAAGGAGAAGACATTCCAGTGATACCAGACCTTGAAGATGTACAGGAAGAGGATTTAGCACTACAGGTAGCTTCTCCTCCGAGTGTTCAAGTGAATAGAGTTTTGACATACAAGGATCTGGATAATGACCTTATGAGA…
ENSXETG00000012892	ptafr	-0.18857634338521584	platelet activating factor receptor [Source:Xenbase;Acc:XB-GENE-968925]	ATGTCTTCAGAGACAACTACAAACTACCTAAGTAAAACAGATCCTTGTAATGTGGATTCCACGTTCAGATACTCCCTCTTCACCGTGACCTATAGCATCATTTTTGTCTTCGGATTCATTGCCAACTGTTATGTCTTGTGGATATTTGGCAAAGTTTACCCTGCCAAGAATCTCAGTGAAATTAAAATTTTTATGATCAATTTGACAGTTGCAGACTTGCTGTTTTTAGTAACGCTTCCACTCTGGATTGTTTATTACCATTACGGAGGAGACTGGTTTATGCCTTCCTTTCTGTGCAATGTGGCAGGCTGCTTTTTTTTCCTCAACACATATTGTTCAGTGGCATTTCTAGGAGTCATAAGCTATAACCGATTCCAGGCTGTAACACGTCCAGTAGAA…
ENSXETG00000007743	mamld1	-0.05542826139056492	mastermind like domain containing 1 [Source:Xenbase;Acc:XB-GENE-6460427]	ATGCTGCTGGTTTCCCAGCGCATAGAAGCACCACGTATGGAGCCCTATTTACCACTGCAAGGATCCATAAAGAGAAAACTGGAAGATGACAGTTCCCCTGGGTCATCTAGCATGAATGATATCATTTTCTCAAGTGACAACAAAAGACTCTGCCTTGATGATGTAACACTTTCTATGGGCCAAACTCAAAACACCAGCTCCGGCATAACTTGCTCTGAATTACAGCACTCTCCTTTCGCAACTAATCAAAATTCAGCTACCATGGGGGTAAGTGCCCATTCAGTTGTTATGGAGAATAATCACATGAATGGTAGAAGTATGGCTTCCCCCTTTTCTGTTCCACAGAGTAATGAAATAAACCAGAAAGCAGCCTTCGAAGAAAAGGCCAGCAATTTACCA…
ENSXETG00000035262	NA	-1.0893705605818282	NA	ATGTGGCCTGTCAACATCGTGGGCTTCGTGTACTCCCTCATGTCTCGCAACAGCCTGCAGCAGGGGGATATCGATGGAGCTTTCCGGCTCGGCCGCGTGGCCAAACTCTTGAGCATTGTGGCGTTAGTTGGAGGAGTGCTGATCATCACCATATCCTGTGTCATCAATTTTGGAAGTAAGTTTGTCAGTCCATTCATTGGGCAGCAGGAAACCCCCACACTATGA
ENSXETG00000038979	NA	0.6233704556361659	probable alpha-ketoglutarate-dependent hypophosphite dioxygenase-like gene B [Source:NCBI gene;Acc:100490918]	ATGAAGGCAGAAGCCACTCAGCTGAAGGCTCTTTATGAAGCTAACGGCTTCCTGACAGCTATTGATGTGCTGGGGAAGGACGAGCTCAATCAGGCCTGCAAGGAACATGCAAAACTGGAGAACAAATTTGGCAAGGAATACACACAGTACAACCTGCACAACATCCACATGCAATATGAGTGGGTGATGAATCTGGCTGCTCATCCCAAACTACTGGATGCAATCATTGCTGTGTTAGGGCCCAACGTTATTCTCCTGGACTCCAGGTTTATCTGTAAATACCCTTCCTCTGACGTCCCCCACAAAGATAACACTGTCCCATACGTTGCTTGGCATCAGGACATCAAGTATTGGGGATTTGAGGGGGGTCCCGTGGCGTCTGTGTGGCTGGCCTTTGAC…
ENSXETG00000017290	chrd.1	0.15180838753102463	chordin, gene 1 [Source:Xenbase;Acc:XB-GENE-480638]	ATGCTTTGTTCCCCCATCTTACTTCTGTGGACCCTGTGGATTATGGCTGTGGATTGCTCTCGCCCAAAGGTTTTCCTGCCCATTCAGCCTGAACAGGAGCCCCTCCAATCTAAGACACCAGCAGGTTGTACGTTTGGTGGAAAATTTTACTCTCTGGAGGATTCATGGCATCCAGATCTTGGGGATCCATTCGGAGTTATGCACTGTGTATTATGCTATTGTGAGCCGCAGCGAAGTCGCCGGGGAAAACCATCTGGCAAAGTCAGCTGCAAAAACATCAAACATGATTGCCCCTCACCCTCCTGTTCTAACCCTGTCCTGCTTTCTGGACATTGCTGCAAGACTTGTCCCAAAGCTCCTCCTCCTCCTATAAAGAAATCAGACTTTGTTTTTGATGGA…
ENSXETG00000037435	tmem169	-0.05388466796329641	SRP receptor subunit beta [Source:NCBI gene;Acc:394639]	ATGGCGGAGCCTCAGGTTCAACATGATTCTCGGTGGTTGCCGGACATGGAGTTCATTACACAGGAGCTGCAGAAGCAAGACCCGACCTTGCTCTCCGTGGGGATCGCCCTAATTGTTGTCGTGCTTAGCTTTGTTCTATGGAAGATTCTGCGAGGCAGTCGGACCAGCCGCAGAGCAGTGCTGCTTATTGGAGTGTGTGACTCGGGAAAAACTCTACTGTTCAACAGGTTACTTACAGGAACATACAAGAAAACCCAAACCTCCATCACTGCCAATTGTGCTGCATATAAAGTGAAGAATGACAAGGGTTCCAGTTTGACGCTTGTTGACCTCCCTGGCCATGAAAGTTTGAGGCTTCAGTTCCTGGAGCAATATAAAGCATCAGCAAGGGCATTGCTG…
ENSXETG00000035337	pecr	0.2441458818450107	NA	ATGCTCAGGAACTACTATACACTTTACAATGAAATGATCATTCAGCAGTGCTTATATTGTAATCGCACTTGGGATGGATGGTTATGTTGGGACGATACCCCTGCCGGCATAAATGTTACCCAGAATTGCCCTGACTACTTTCCTGATTTTGATCCAACAGAAAGAGCGTCCAAATACTGTGATGAGAATGGCAATTGGTTCCAGCACCCTGAAAGCAACCGCACGTGGTCCAACTACACTCTCTGCAATTCATTTACCTCTGAGAAGCTGAAGGTGAGATTAACATGGCTTCATCCCCTACACTCATGCATAATGCAAAGGTGTGGTTGCTGGAACACTAACGTAGTTTGA
ENSXETG00000013217	esrrb	-0.019236079542713697	estrogen related receptor beta [Source:Xenbase;Acc:XB-GENE-483510]	ATGGACCTGCCAGAAGTCTGTGTTTCGGAATCGCTGTCCTACCACAACCAGTTCCTGGTCAGGCTGACTGCTGATGAGCGCCTCCTTACAACTGGATGCTTCATTAAGCGGGAACCATGCAGCCCATCCTCCCTTGCAGGATTTGGAAATCACCACAGTCCCAGTGGATCATCTGATACCAGTGGAGGCTACAATCCAACGTTCCAAGGGACACTTAGTGGCTTGGAATCCCCTTCCATGACTAGAAACCATAAACCTTTTGAAATACGTGATGAGACAGAGTCTCCTGCTAAGGCTGACTATACTGTGAGTGTAGCACCCAAACGTCTGTGCCTGGTTTGTGGAGATGTGGCCTCTGGGTATCATTATGGTGTGGCATCATGTGAGGCCTGTAAAGCC…
ENSXETG00000041302	slc30a5	0.2684538946840188	aldo-keto reductase family 1 member C1 homolog [Source:NCBI gene;Acc:100494522]	ATGGTGCTGCACAAAGACCCCTGCGTTGAGCTGAATGATGGGCACAAAATGCCAGTGCTTGGGTTTGGCACCTATGCCCCAGAGAAGTTCCCCAAGAGCTTGGCAGAAGAAGGCACCAAAGTGGCCATTGACGTTGGATACCGCCATATTGACTGCGCGTTTATCTATGGGAATGAGGTGGAGGTTGGACGGGCGATCAAGGCAAAGATTGCGGATGGTACTGTGAAGAGGGAGGACGTGTTCTACACTGGGAAGCTCTGGTCCACGTTCCATACCCCCGAGAGGGTCCGTCCAGCCCTGGAGAAATCTCTGACAGATCTGCAGTTGGATTACATGGATCTCTTCATCATCCATAATCCGGTGGAGTTCAAGCCTGGAGATGACCCCTTGCCATTGGAT…
ENSXETG00000034028	NA	0.027685365786329935	claudin 22 [Source:NCBI gene;Acc:100485528]	ATGGCATTGGTTAAAAGAACTAATGTTCAATTTGGAGGGATCTTGTTGTCCTTGACAGGATGGATTCTCTCCTGTGTCACTACCTATATTCCTGTCTGGAAAAACCTCAACTTGGAACTAAATGAGTTAGAAAATTGGACTATGGGACTGTGGCAAACTTGTGTGGTCCAAGACGAAGGCCCCATGCAATGCAAGGATTTTGATTCTTTTTTGGCACTGTCTTCTGAGCTCAAGATATCAAGGATCCTTATGTGCTTATCCAATGGCTCAGGTATAATTGGGCTTCTGCTCTCAATTTTTGGCCTGGACTGTGTGAGAATTGGAAAAGGAAATCAAGCACAGAAGAACCGTCTGCTACTTTTTGGAGGAATAATGCTTTGGACTTCAGGATTAAGTGCC…
ENSXETG00000035780	NA	0.7643458724048071	NA	ATGGGAAAGACCAAAGAGCTGTCCAAGGATGTCAGAGACAAAATTGTAGACCTGCACAAGGCTGGAATGGGCTACAAAACCATTAGCAAGAAGTTGGGAGAGAAGGTGACAACTGTTGGTGCGATTGTTCGAAAATGGAAGGAGCACAAAATGACCATCAATCGACCTCGCTCTGGGGCTCCACGCAAGATCTCACCTCGTGGGGTGTCAATGATTCTGAGAAAGGTGAAAAAGCATCCTAGAACTACACGGGAGGAGTTAGTTAATGACCTCAAATTAGCAGGGACCACAGTCACCAAGAAAACCATTGGAAACACATTACACCGCAATGGATTAAAATCCTGCAGGGCTCGCAAGGTCCCCCTGCTCAAGAAGGCACATGTGCAGGCCCGTCTGAAG…
ENSXETG00000002389	nat8l	-0.10343786330366	N-acetyltransferase 8-like (GCN5-related, putative) [Source:Xenbase;Acc:XB-GENE-5817008]	ATGAGTTATCTGCCCCCCAAAATGGTCTGCGAAACGAAAATCCTTGCGGATGACCTACCGGGGCACCAGAAAGAGCCCTTGCTGCTCCCCTCCTCCCAGATGTGGCCCCCTTTGCCCAGTGGCCCCGCCGGTTCTGCACTGGGGCCCCCCAGCTCCGGGGCCGAGGAGGAGATGACTAAGGAGCAAGTTTATCTCCGGGAATTCCAGCCCGCAGACCAGGAGTTTGCCAGGAGGATATTCTATGAAGGAATTAAGGAAAGGATCCTTAGCTCGGCATTCAGAGGGTTAAAATACCAGCCCCTCCTACAGAGTGTATATGCGGTGATCATAATAATGTGCTTTGTTGTGACCAAGTCCTTGCTGGTGACGTGCTGTATGCCCCTCTTTCTATTGGGCATG…
ENSXETG00000004487	ccnb1	0.38061962397967175	NA	ATGACTCAGGTATCCAGGTTAGGAAATAACAGACAGACTTCCTTGTTGGGTGATAACCCCACCTCCCTGCCTCTCTGCCATGTGTATAAAGAGCTCAGAGAGGCTTCCTTCCCACACTGTTGTGCTCCTTATCGCAGAGGCACCTTTGTGTTTGCAGCTCTCCCTGAAGCTATGGCTAAGAAGGTGGCAGTGATCCTTGCTGGTTGTGGGGTTTATGACGGCAGTGAGATTCATGAATCGTCGGCTGTCTATGTTCATCTGAGCAGAGCCGGAGCTCAGACTGAATTTTTCGCCCCAAACACAGACCAGATGCACGTAGTGAGTCACACCAAAGGGCAGCCCACAAAAGAGACACGCAATGTGCTTGAGGAGAGTGCACGGATCGCAAGAGGAAATATT…
ENSXETG00000036750	zranb3	-0.004295986544234159	NA	ATGATGTACAGTATATGCTGCATATACACAGCTAAATCATATTCAATTTATTTTGTAATATTCTTTTTAATTTCAGAGGATCTTGGTTCAAGGTCACAGGAGGCTTCTGGCTGTAATCACTTTATAGATAGTAACCGATCAGCTTTGATTGACAGAATGTCCGTCCCCACTATTAATGCTGTTCTGGATGAGCTACTGAGCAAGGAGATCCTGAATGATGAGCAGTACAGCACTGTGAGGAGCAAGAAACTCTCCCAGGAGAAGATGAGGGAGCTTTATAGCTGTGCCAAGTCCTGGAGGCACCAGGATAAGGACATGTTCTTTTTCCTTCTGTCAAAACACAATAAATCACTTGTTATGGATCTCATGAAATACTAG
ENSXETG00000036652	rab3gap1	-0.30312494714877264	NA	ATGGGAATGTGGGAGGAAGCGAGTGACCCAGTGATGGGGAAGAAGGATAAAAATGAGGAGCGGAAGGAGAGAATCCTGAATCTCACACTGGAGATTATCTATCTGCTGACTGGAGAGGGCTACGTCATCCCTAAGAAGAAGAGCCCAACTGTGGGTTTGGGGGCCCTGCATGCCCCTGGCTCCGTCATACAGAAGGAAAATGACAAGAAGATCCTGGAACTCATCTCCAACATCATCCAGCTGCTGACTGGAGAGGTTGCCATAAGGTGTGAGGATGTTTCCATCTATTTTTCCTTGGAGGAGTGGGAGTATATAAAAGAAAACAAGGCCCTTTACAGGGAAGGAATAAAGGAGGAGGAGCCCCAGCAGCTCCACCCACTGCATTGTGACAACGAAGCT…
ENSXETG00000006049	NA	0.3067998804894757	synaptotagmin-1 [Source:NCBI gene;Acc:100497338]	ATGCTGCAAATTGCCCTCGCTTCGTTCCAGATATTTCTCCCCTTTTCCAATTCAGTTAAATACATTCTTCTGGGGGTGGCAATATTCTTGTTCCTGGTGGCAATCTTCCTTTTAGTCTACAACCTTTACAAGTACCTAAGATATAAATCATCTGTTGCTAGAAATGAAAAGACATACCTTGATGGAACATATGTTGAGAAGAAAACTACGAGCAACATCCTACTGAAAAGTGTAGCTCCAACCTTTCTAGAGATAACCAGAAAAGAACAAGACTCAAAGATTCAACTAATGAGAAAGGAAATGGAAAAGTTGGAAGAGCGTCTTACTCCTTCACCTCCCAGTACAGAAAGTTTGGATGATTTGGATTCTAACCCTCCACTTATGCCTAGAGGGAAACTA…
ENSXETG00000036893	NA	0.1371148575583497	putative claudin-24 [Source:NCBI gene;Acc:100486784]	ATGACTGTGACATGGAAGCTGAAACTGCAATATGGAGCACTGTTTTTCTCAGTTTTGGGATGTGTGCTGATCTGTGTAAGCACCTTTGTTCCACTATGGAAGTTTCTGAACTTGGATCTTAATGAGATGGAGACCTGGAACATGGGATTGTGGCACATTTGTGTAGTGCAGGAAGAAGGAGGGACGGAGTGCAAATATTATGATTCCTTTTTGGCAATGCCATATGATCTCAGGATCTCAAGGATTCTGATGTTTCTCGCCAATGGCATTGGACTGACTGGCCTCGTCATGGCTAGCTTTGGCATAGACTGTTTAAAGTTTGAAAAAGAAATAAAAAAGAAGCTGTCCATCTGTGGAGGTATACTTCTGTTGTTGTCAGGCATCATTTCATTGGTCCCT…
ENSXETG00000024063	cyth3	0.14175494108396988	cytohesin 3 [Source:Xenbase;Acc:XB-GENE-941327]	ATGACTTGTATTGATGCTGAGGTGCCTGAAGATCTCTCCCCTGAAGAGCGAGAGGAACTTTTGAATATACGACGAAGGAAAAAAGAGCTCATTGATGACATTGAGAGACTGAAATTTGAAATAGCAGAGGTGATGACTGAAATCGATAATTTAACATCTGTAGAAGAAAGTAAAACTACACAAAGAAATAAACAGATTGCAATGGGAAGGAAAAAATTCAACATGGACCCCAAAAAGGGCATTCAGTTCCTCATAGAGAACGACCTACTGCAAAACACGCCAGAGGATATCGCTCAGTTCCTGTACAAAGGGGAAGGGCTCAATAAGACAGTCATTGGAGATTACCTGGGGGAGAGGGATGATTTCAACATCCATGTCCTTCAGGCGTTTGTTGAACTC…
ENSXETG00000013214	vash1	0.022794776152727486	vasohibin 1 [Source:Xenbase;Acc:XB-GENE-956494]	ATGCGTATAGGGCTTGCTTTGGCTAGTAGTTACGTGGAATGCGTTGGCAGTGTATTAACCTGTGGCAGGGGTGCAACAGAGATGTCTGAGCCGCTTCAGAATGGAGGGGATGAGGAGGATGGGGGAGCTCCTTTTTATGTGAATAGAGGGGGCCTCCCAATAGATGAACCAACATGGGAACGAATGTGGCAGTTCGTGGGCAAAACCCATCCTGACGGGGAGGCGCTGGTGAGAAGGATTCGGGAGGCGCAAGATCTGCCCCGGGTTCCAGCTCCTAGTGTTCCATCCTTTCATGTTGGAGCCACAGTTCCAGAACGCATTGAGGCTATTCAAAGATACATTCGAGAGCTGCAATACAATCACACAGGGACACAGTTCTTTGAAATCAAGAAGACACGG…
ENSXETG00000014983	XB5863530	0.09516466717445157	estradiol 17-beta-dehydrogenase 12-B-like [Source:Xenbase;Acc:XB-GENE-5863531]	ATGCAGGTAGTGGGGGCGGAGCCTAAGCCAAGCAGGCTGTTCAGCTTTGCACCTTGCCAGTATCCAGGGATCATGGTGAGTGTGCTGGAGGAAGGCTGCCTCTCCCGGGGCTTTGCGCTCATTGGGCTCATTACTGTGGGCTACGTAGCCATCACCCAAGGCTGGAGGATACTCTGCGGCTTCAGAGCCCACTTTGTGTCCCACTGGTGGAAGCCCAACCTCAGGCAGTATGGAACCTGGGCCGTGGTGACGGGGGCTACAGACGGGATCGGCAAATCCTACGCGGAAGAGTTGGCCCGGAGGGGATTCGACATTGTCCTGATCAGTAGGAGCCCAGAGAAACTGCAGAGAGTGGCAGAGGGGATAGAACAGAAGAGTGGACGCAAGACCAAGATAATC…
ENSXETG00000036019	selenof	-0.015777333185918035	NA	ATGTCGCATCAGCAAATCAGAATCCTGGGGAAGGAGGATTTTGTGGAACCAGTGCTGGGATCTAAGCTGCTCCCGAAAATACCCTCAGTCAACAAATATGAGAGCAGGGGACCTCCAGATCCAAGGGATATTGACATGCAAAGTAAATCCAAAAGGTACCTGAGCTTTAAGGATGTGTTTTATATGTTCCATTTTAAATCACCGCAAAATAAGCTGGCCAATGCAGGTTTCTACTATGTGGGCCCCGAGGACCGTGTGCGGTGTTTTTCGTGTGGGGGTCAGTTTGAGATGTGGGAGGAATGGGATTTTCCTCTCACCCGTCACCAACAAACCTTCCCTGAATGCCCCTATCTGCAGGAGCTGAAAGCCAAGGGGGAATGGAAAGATTGCCACTACGAG…
ENSXETG00000037363	ccnt2	0.08114952994715016	zinc finger protein 81 [Source:NCBI gene;Acc:100497179]	ATGCAGCACCTGTTGGACCCAATAATACTCAACACAATGAATAAAGATAAGAAGCAAATGACTGAGAAGATATTGAATCATGCCCTGGGTATTATATTCTTACTCACCGGCGAGGAATACATCATTGTGAAGAAGAATTATCCCCACAGTAGCATTCAGCTGCTAACTGGAGAGGTTCCAATAAAGTGTGGGGATGTTGCAGTCTATTTCTCCATGGAGGAATGGGAGTACATAGAAGGACACAAGAAGCATTACACGGATGTTGTAACAGACAATCAGAAGTCTTCAGAAGTTCCAGCACAAGAACACCCTGGCCTTTGTGACAGAAATCAAAACATGGCGGCAACTAATGACGTGGACAAAATGGAGAAACATGGTAATGCTGTTCAGCAGGATCCT…
ENSXETG00000005127	gata5	-0.47835775751222254	GATA binding protein 5 [Source:Xenbase;Acc:XB-GENE-484906]	ATGTACCCCAGCCTGGCCCTCACTGCCAACCATGCCCAGCCGGCCTACTCCCACGACCCCTCGAACTTCCTGCACTCTACGGGCAGCCCCCCGGTCTATGTGCCGACTAGTCGGATGCCGGCCATGCTACAGTCGCTCCCCTACCTACAGAGCTGCGACACTGCCCACCAGGGCCACCATCTGGCCAACCACCCGGGCTGGGCACAGACTGCCAACGAGAGCCACACGTTCAATGCCAGCAGCCCCCACACCCCCAGCGGATTCCCTTACTCGCACAGCCCCCCTGTGGGCAACGCCAGTGCCAGGGAAGGTGCCTACCAGAGCCCCCTGATCATGGGCAGCAGTGCCAGGGACCAGTATGGCAACTCCCTGGTGCGCACCGGCTCCTACCCCAGCCCC…
ENSXETG00000035329	NA	0.1932226027951763	NA	ATGTTAGTCCTGCTGTTTGGGATCCTGCTCACAACGGTCACGGGAGAATCGGGCGACTACCCAAATCACAATGGAAACAAGGGTGGGAACGCACACAACAGACACACGGAGCCGATCCCCAAGCCAGAAATAAGAGTGAGCCCCAAAGTGATCACTGAAGGAGCTGATGTGTCCGTATCCTGCCATTATACTCCAACCCCACCAGGAGAGATTCCATGGCTGCAGTTTGCATTATACAGAGATGGAACAATCATGGAGGGATTCAGTTCTGCCAGTGAGTGGCACATTTCCCCGGCCCGGGCGCAGGACTCAGGAAATTATACATGTGCAGTTAGACCCCAATATGGAGAAGAACAGAGAAGCGCTGCTGTCTATATTCCCATACACGGTAAGGATCCA…
ENSXETG00000037876	NA	0.7268479613551246	NA	ATGGGAAAGACCAAAGAGCTGTCCAAGGATGTCAGAGACAAAATTGTAGACCTGCACAAGGCTGGAATGGGCTACAAAACCATTAGCAAGAAGCTGGGAGAGAAGGTGACAACTGTTGGTGCGATTGTTCGAAAATGGAAGGAGCACAAAATGACCATCAATCGACCTCGCTCTGGGGCTCCACGCAAGATCTCACCTCGTGGGGTGTCAATGATTCTGAGAAAGGTGAAAAAGCATCCTAGAACTACACGGGAGGAGTTAGTTAATGACCTCAAATTAGCAGGGACCACAGTCACCAAGAAAACCATTGGAAACACATTACACCGCAATGGATTAAAATCCTGCAGGGCTCGCAAGGTCCCCCTGCTCAAGAAGGCACATGTGCAGGCCCGTCTGAAG…
ENSXETG00000037301	c4orf48	-0.6158486368506702	chromosome 4 open reading frame 48 [Source:NCBI gene;Acc:100491954]	ATGCCTTCCAGAAGCACATCAAGGTGCATCTACTCCATGCTCTTCCTCATGCTAACGATGGGGCTGCCGTTCATGAAGCTGGTCTTAGCAGATGAACCATCTGGAACAACTATTCCCCCAGAAAGTCGCCCCTGTGTCGATTGCCATGCGTTTGAATTCATGCAAAGAGCACTCCAAGACCTCAAAAAGACAGCGTACAACCTAGACTCACGGACGGAGACCCTTCTGCTTAAGGTGGAGCGGAGAAGCCTGTGCGACTGCATCACCGCCGAGGGCTTGAGCTGA
ENSXETG00000038513	rnf26	-0.24840125376333083	ring finger protein 26 [Source:NCBI gene;Acc:779652]	ATGCAGGGGATCATTCTGTTCCTCAATGGGCTTGGCTGGACCCTGGACATGTTGTTCCTGTTGCTGGACTTAAATTACATGCTTGTTTCCTCTGTTGTATCAGTTTTGTGTTGGACCATTTGCTTTATCTTTAACCTTCCCTGGACCCTGACCAATGGCATTCTTCAGTTGTGGGAAGCTGTATTGGGATTTGTGCTTATGGTTGGTGATTCTTCCTGCAGCCTTGCACTGGGCACAGTGCAGACATTAGTGGATGCTTTATGGGGATGCCTTGCTGGTTTAGACAGTTTGAAGTTGATATGGAACTTGTTGTGCCACCTACTATTCCGCAGTAGGGAGCTGATCCATCGAGGGCTGCTGAATATCACATTCTCTGTACAGACTTTTCACAGGAATTTC…
ENSXETG00000013900	tfpi2	-0.148035253434793	tissue factor pathway inhibitor 2 [Source:Xenbase;Acc:XB-GENE-1002090]	ATGCATGCCTCCCTCCAGGCTCTGATGGCAGCCAGCCTCCTCATTCAGGTTTTTGGCTCACCCATGCAAGGTAACACCACGGTCTGCTTGTTGCCCCCCGATGAGGGCCCATGTAAAGCTCTTATCCCACACTATTACTATGACCGATATACACAGACTTGCCAGGAATTTTTATACGGTGGTTGTGATGGAAACTCAAACAAATTTCTCTCTATGGAGGATTGCGAAAAATTTTGTTGGAAGATCAAAAAGGTTCCTAAAGCCTGCAGAATGGATCCTGATGAAGGACCTTGCCGGGGCTTCTTAAAGAGATACGCTTACAACATGCAGACAATGAAGTGTGAGCAGTTTTATTACGGTGGCTGCTACGGCAATGACAACAATTTCAAAGATAAAGCC…
ENSXETG00000031363	rab6b	0.019825554982519117	RAB6B, member RAS oncogene family [Source:NCBI gene;Acc:100038231]	ATGTCTGCAGGGGGAGATTTTGGAAACCCTCTGAGAAAATTCAAGCTGGTTTTTCTTGGAGAGCAAAGTGTTGGCAAGACATCTCTCATCACAAGGTTTATGTATGACAGTTTCGACAACACATACCAAGCTACAATTGGAATAGACTTTCTTTCAAAGACAATGTATCTGGAGGATCGGACGGTTAGACTGCAGCTGTGGGACACTGCTGGCCAGGAAAGGTTCCGCAGCCTCATCCCCAGTTATATTCGGGACTCCACCGTGGCCGTGGTGGTTTATGACATTACAAACCTGAACTCATTCCACCAAACATCCAAATGGATCGATGATGTCAGAACAGAAAGAGGAAGTGACGTCATAATAATGCTAGTTGGCAATAAGACAGACCTTGCAGACAAA…
ENSXETG00000027089	fut3	0.2517949354107768	fucosyltransferase 3 (Lewis blood group) [Source:Xenbase;Acc:XB-GENE-5889327]	ATGGAGCTGAAAATACAGACATTGTCATTTAAACATTGTCTTTTTTTCTTCACTTTTCAGGTAGTAGTAGCATTTTTCTTCTTCTCTGCTACATTCCAAGGCAAAGTCAAACCTGATGATATTTTTGTGACTGATGTTCCTTCTAAGCCAGAGGAGCCAGTGAAAATTATTTTGCTGTGGACTTGGCCCTTTGGTACTGCATTTCCCCTGAATCAGTGCCCGAGTCAGTTCGATGGAACTGGTTGTTTCTTTACAGTCAATCGCAGCTTGTATTCAGAAGCAGCAGCTGTTGTTCTACACAGCAGAGATGTATGTTCATCTAAGAACCAGTTACCGCAGATGCAAAGACCCCCAAATCAATATTGGATTTGGTTTACCATGGAGTCCCCAAGCCACAAT…
ENSXETG00000028038	mrps21	0.35221440007065796	mitochondrial ribosomal protein S21 [Source:Xenbase;Acc:XB-GENE-1010108]	ATGCTGCTACTAACTTTTTTTTTTGTTTTTACTTCCTTTCCTAGTGCTGCTGGGATGGCGAACCATCTGAAGTTTATTGCTCGCACTGTCATGGTCCCCAGTGGAAATGTGGACATGGCTTACAAGATGCTGAACAGGATTCTGACTGTGGATGGCATCGTAGATGAAGCAAGGCGGAGGCGATATTACGAGAAGCCTTGTAATAAGAGACGGAGAGAGAATTATGAGAACTGTCGCCGGATCTATAACTCTGAGATGGCAGGCAAGGTCTCCTTCCTCATGAGGAAGAATCGCCAGGATCCTTGGCCTGGGTGTTAA
ENSXETG00000012919	phyhd1	0.019390016479564037	phytanoyl-CoA dioxygenase domain containing 1 [Source:Xenbase;Acc:XB-GENE-966497]	ATGACAACCAAAACCCCCACTGTACCATTGCTGCTACCATTGCAACCTCCCTCTTTCAGCTGTCATTCACTTGCTTCCTTTGGTCTGTCTGTCTGCCCCCTACATCATTTAGAAATGTGCCCCCCCCACCTTACCTACACCCTAGGCATGTACCTACCCTGCCTTCCCCTAATGCCTGAATCACAAAGTGGTCTGACTCCAAATGAATGGCGCTTCTCTGTGCAGTATCACAGGGATGGGTACCTGGTACTGGAGGGGGTGTTTAGCCCCCAGGAGTGTGAGCTGATGAAGCAGGAGATTGAAAAGATCCTGGGGGGAATGGATGTGCCATCCCACTGCCGCACAGAGTTCATCACTCAGCAGGAAGACCAGCTCCGTGCCCAGGGCAGTGCTGATTAT…
ENSXETG00000026378	XB5729271	0.2587124700623077	novel C3HC4 type (RING finger) and B-box zinc finger protein with SPRY domain [Source:Xenbase;Acc:XB-GENE-5729272]	ATGGCAGCTGCTGGTGTGAGAGACGAGCTGACCTGCTCCATCTGCCTGAACCTTTATACGGACCCTATAATGCTGCCATGTGGCCATAACTTCTGCCAGGGCTGTGCCGAGAGGCTGCTGGATTCCCAGGAGGAGTCTGACGGTTATTCCTGCCCTGAATGCAGAGCGGAGTTTCAGGAGCGCCCTGAACTGCAGAGGAACAGAGCCCTGGGGAACATAGCCGAGCACTTCCGTCCTAATAAGGGAGAGCAGGGGGGGAGTGATATCTGCTGCACCTACTGTGTTTGCTCATCTGTAGCTGCTGCTAAATCCTGTCTGCACTGTGAGGCTTCCCTGTGTGACACTCACCTGAGGGTGCACAGCAAGTCAGCAGAACATGTCCTCACTGAGCCCACCACC…
ENSXETG00000013213	thbs4	-0.16657317708856895	NA	ATGATGGAAGGACAGCAAACTGTCTCTTATTTGAAACCAAACAATGATGAAGCATCACACACAAATTTAAACATGGAATGCGGTGACAAAGCAATAATTAAAGATAGCATTGGATCTTTTACAAAGAGCATGCAAAATGAGTCTTTATGTCAATGCAAAGAGAAGCATACCACAGAGTCTGATAATGAAGCAATACTTGAAACTTTGCCTCGGTCGGGCTTGCACAGTTACACAAGGCAGGATGATTCTGCTGTAAAAGAATGGGTGCTGCGTAAAGAGAAACCTTCAGAAGAGGACAGTTGGCATCTCTTAGATTTGGAGCAGTCCCTGCCACAACCTGCAATGTACTCTGGTAAAATTTTCCTTATAACTATCCCTGATGCTTTTTTAGATATATAT…
ENSXETG00000015990	NA	0.22985867406300473	NA	ATGTTCTCTAAACCAAAACTGAGAGTGAGCTCCAACCCTATTACAGAAGGCTCAGCCCTGACCCTGACATGTGGTACAACTCCCAGTACAGTCAGCACCCAGGAACTGCAGTTTGCTTTCTACTGGGATGGGCAGGAGCTGCAGGGATTCACTTCATCCAATCAGTATCGAGCTTACTCAGTTCAGCTGGAGGATTCTGGGAATTATACCTGTGAAGTGCAACATCCAGCTAAAAGCATTAATAAAACAAGTGACATGTCTTATATTCAGGTAGTAGGAGGAGCAGTCAGACCTGTGGTTTCCTTATCCCCCAACTGGGCCAACATATTAACTGGTGACAAGGTGACTCTGACATGTGATGTGGGTTCTACAGCAGGAACAGCACCCAGATATTCCTGG…
ENSXETG00000018920	elp2	0.17582399891686454	elongator acetyltransferase complex subunit 2 [Source:Xenbase;Acc:XB-GENE-5752362]	ATGACGTCTATAGCAGCTAACATGTCTGCTCCCATAGTTCAGCTTGCACATGCCGCCTTCTCTGTAAATCGCTGTCCTAGCTGTGTGAGTTGGAGCCGGACTGGAATACTCGCATGTGCGACGTGTCATTCTATTGCATTATATGACCCTCAGAAAAATGTTGTGATATCCACACTAAATGGTCATACCGGAAGAGTAAACTGTGTGCACTGGGTTCAGAAGAATGACTGTAGTGCTGAGACAGAACTGGTATCTGGTGGATCTGATAAGAAGGTGATCATATGGGCGATAGAAAAAAATAAGTGTGAGCAACCTGTTGCAGCTGAAGGTCATACAGAAGTAGTAAATGCTGTCCATGCTGTCTATACGCAAAGATCTGAGAATGAACTTCTCATTGTT…
ENSXETG00000021595	c1qtnf5	0.18693960702695386	C1q and TNF related 5 [Source:Xenbase;Acc:XB-GENE-1011870]	ATGATACCATTGCTCCATCTGCTATCCCTGGTCACTTTAATACCAATCACCAGTCCAATAGGGGATAACAAGATTGCCTCTTCCTGCTGCGGAATGCCAGGAATTCCAGGTATACCCGGGACACATGGTAATGCTGGATTACCTGGAAGGGATGGGAGAGATGGAAAGGATGGGAGCCCAGGCACAAGTGGACCTAAAGGTGATTCTGGAGAACCAGGAATCCCTGGTGCTCGAGGTTTCCCAGGTATGGCAGGTCCTCCTGGTGTACAAGGTGATAAAGGAGTGCAGGGGGAGTGTGCTGTGCCCCCCCGCTCTGCGTTTAGTGCCAAGCTATCAGAGTCCCGCACATCCCCCATACCTGGGCAGCCTGTTCCCTTTGGCAAGGTTCTAATAAATGAA…
ENSXETG00000041253	acmsd	0.2507521961729319	fucosyltransferase 6 [Source:NCBI gene;Acc:100495376]	ATGGAGCAGAAAATACAGACATTGTCCTTTAAACATTGTCTATTTTTCTTCACTTTTCAGGTAGTAGTAGCATTTTTCTTCTTCTCTGCTACATTCAAAGGCAAAGTCAACCCTGATGATATTTTTGTGACTGATGTTCCTTCTAAGCCAGAGGAGCCAGTGAAAATTATTCTGCTGTGGACTTGGCCCTTTGGTTTTGCATTTCCCCTGAATCAGTGCCCGAGTCAGTTCGATGGAACTGGTTGTTTCTTTACAGTCAATCGCAGCTTGTATTCAGAAGCAGCAGCTGTTGTTCTACACAGCAGAGATGTATGTTCATCTAAGAACCAGTTACCACAGATGCAAAGACCCCCAAATCAATATTGGATTTGGTTTACCTTGGAGTCCCCAAGCCACAAT…
ENSXETG00000025999	agmat	-0.4336380599184383	agmatinase [Source:Xenbase;Acc:XB-GENE-997016]	ATGGCCGGACTCACTAGCACCGTCAGCAGGGTGGGCTCCCTCCTCTCGGCACAGTTGTGCCCCCCCAGGGCTGTATCTCTTGGGGCCCATTTTCCCCCATACAAGCAGGAGCAGCGTTCCAGATGGGCCCCCCTGAGATCCTATCACTCCTCCCCCAGGAGCCCCCCACCTCTTCTTGGGAATAACCTGCTGAAACTCCAGGCCCCCCCCAGCCGCAGGGCATCGGGCAAGTTTAATGTGCCCCCCAGCGCCCAGTATGTGGCCCGGCCAGCGGGGGTCTGCACCATGATGAGACTGCCCTACCAGGAGACTGCACAGGGATTGGACGCCGCCTTTATTGGGGTCCCCCTGGATACCGGCACCTCCAACCGCCCGGGAGCGAGGTTTGGGCCGCGCCAC…
ENSXETG00000014651	cog3	0.24370416161374772	component of oligomeric golgi complex 3 [Source:Xenbase;Acc:XB-GENE-855843]	ATGACTGCTCTTAACTGGAAGCCCTTTATATATGGGGGGCTAGCCTCTATCACTGCTGAATGTGGTACATTCCCCATAGACTTGACCAAAACTCGTCTCCAGGTACAGGGTCAAGCTAATGATGCCAAATATAAGGAAATCCGATATAGGGGAATGCTGCATGCAATTGTGAGGATATGGAAGGAAGAAGGCGTGAAAGCACTTTATTCTGGAATAGCACCTGCAATGTTACGGCAGGCGTCGTATGGCACCATTAAAATTGGCACTTACCAGAGCTTGAAAAGATTGTTTGTTGATTGCCCAGAAGATGAAACGTTAGTCATCAATGTATTCTGTGGTGTACTGTCAGGGGTGGTTTCTTCCTGCATTGCCAATCCTACAGATGTTTTAAAGATAAGA…
ENSXETG00000035886	fut3	0.21177737631707236	fucosyltransferase 3 (Lewis blood group) [Source:NCBI gene;Acc:447987]	ATGGAGCTGAAAATACAGACATTGTCCTTTAGACATTGTGTATTTTTCTTTACCTTTCAGGTAGTAGTAGCATTGTTCTTCTTCTCTGCTACATTCCAAGGCAAAGTTAAACCTGATGATATTTTTGTGACTGATGTTCCTTCTAAGCCAGAGGAGCCAGTGAAAATTATTCTGCTGTGGACTTGGCCCTTTGGTACTGCATTTCCCCTGAATCAGTGCCCGAGTCAGTTCGATGGAACTGGTTGTTTCTTTACAGCCAATCGCAGCTTGTATTCAGAAGCAGCAGCTGTTGTTCTACACAGCAGAGATGTATGTTCATCTAAGAACCAGTTACCGCAGATGCAAAGACCCCCAAATCAATATTGGATTTGGTTTACCTTGGAGTCCCCAAGCCACAAT…
ENSXETG00000036485	tmem163	0.7065863750050285	probable alpha-ketoglutarate-dependent hypophosphite dioxygenase-like gene a3 [provisional] [Source:NCBI gene;Acc:100490235]	ATGAAGGCAGAAGCCACTCAGCTGAAGGCTCTTTATGAAGCTAACGGCTTCCTGACAGCTATTGATGTGCTGGGGAAGGACGAGCTCGGTCAGGCCTGCAAGGAACATGCAAAACTGGAGAACAAATTTGGCAAGGAATACACACAGTACAACCTGCACAACATCCACATGCAATATGAGTGGGTGATGAATCTGGCTGCTCATCCCAAACTACTGGATGCAATCATTGCTGTGTTAGGGCCCAATGTTATTCTCCTGGACTCCAGGTTTATCTGTAAATACCCTTCCTCTGACGTCCCCCACAAAGATAACACTGTCCCATACGTTGCTTGGCATCAGGACATCAAGTATTGGGGATTTGAGGGGGGTCCCGTGGCGTCTGTGTGGCTGGCCTTTGAC…
ENSXETG00000037911	mtx3	-0.10564709419400836	1 [Source:NCBI gene;Acc:105947788]	ATGAGTGAAGTTAATAGGCTGCCCCTCTGTGCCACATCTGAAGATGAGGTGAAGTTCTGCAATCCTGCCTTTGACTCTATGTCTGAGGTCTTCTTAACAGAAACTATTGGAGAAGATACTGTGCCACCAACCTCCCAGGTCAGCACTGTTCCTAGACCAAGGGGAAGGTGTTGTTCCAACAGGCCCCGAGCCAACCACACCATCATCATAATTCTTACTACACTGCTGGTTCTTTTTGTTCTGATCTTCAGCTTCACATTGGGAATCTTGATCTCCAAACACAAAGTAGAAGATTTGGCACTAACTGGTGTCTCACCAAATAACAACAGCAACATTTCATCCCCAGACTCTAGGGATTTTACAGAATCCATCTCAACAGTTTGTGGAGGCACCTTGAAT…
ENSXETG00000012216	msi1	-0.037688242503191166	musashi RNA binding protein 1 [Source:Xenbase;Acc:XB-GENE-490596]	ATGGAGACAGAAGCGCCCCAGCCCGGACTGTCGCCCCCGGACTCCGCGCACGATCCCTGCAAAATGTTCATTGGGGGACTGAGCTGGCAGACGACACAAGAGGGCCTGCGGGAGTACTTCAGTCATTTTGGGGATGTAAAAGAGTGTCTTGTCATGAGAGATCCATTGACCAAAAGATCAAGGGGATTCGGATTTGTAACTTTCATGGACCAAGCGGGAGTGGACAAAGTTTTGGCTCAATCACGACATGAGCTGGACTCAAAGACGATTGACCCAAAAGTAGCATTTCCTCGGAGAGCTCAACCCAAGATGGTAACACGGACAAAGAAGATTTTTGTAGGGGGCTTGTCAGTTAACACAACAGTTGAAGATGTGAAACAATATTTTGAGCAGTTTGGG…
ENSXETG00000019930	rrnad1	-0.10425210420473119	ribosomal RNA adenine dimethylase domain containing 1 [Source:Xenbase;Acc:XB-GENE-5845705]	ATGTATATCCTACAGGAATTTTTCACCGACAACCTGTGGGAGAAACTTCCAGAATCCTGGAGGACGTCCCTGTCGGATCTTTCATCTCCTGAATTAGCCGAGCAGCTGCTGTCTAATGGGAGGAGAGGTACTATCAGTTACAGGTCAGTATGGCCGCTGAGCCTGTTAGCGCTGAAGGCGACGGCACACTGCCTGGCGTTTCCCAGGATTCCCGTGAATGAAGCGGCCAACAAAAACCATAAAAGGCCGGAGGAATTCTGTGAAAATCACTGCCAGAGCAACAAGCTGGATCCTCTCTTCCGGAAGCATGTGAAGCCTAAAAAACAGCACGAAATCCGGCAGCTGGGCAAGCTGGTGAGAATACTGAGTGAAGTAACCGGATGTGAGCAAGTGGTGGAC…
ENSXETG00000013901	gngt1	0.6007936060678192	guanine nucleotide binding protein (G protein), gamma transducing activity polypeptide 1 [Source:Xenbase;Acc:XB-GENE-952138]	ATGCCGGTCATTAACATAGAAGATCTAACAGAAAAGGATAAATTAAAAATGGAAGTTGAACAACTCAAGAAAGAAGTGAAGCTGGAGCGACAGCTGGTTTCCAAAATGTGTGAGGAAATTAAAACCTACATTGAGGACAAGTCTGGAGAAGATCCTCTTGTCAAGGGTATTCCTGAAGACAAGAACCCCTTCAAGGAGAAAGGAGGCTGTGTGATTGCCTAA
ENSXETG00000036340	cmya5	-0.0372535502478947	NA	ATGAGTGGCAGCAACATTGAAGGTATGACACAGTGCACAGCCTGCCGCATGTATGCAGTTGTGGAACAACAGTTCCAAAGTGCATACCTCTGTTGTGGATGTGAGCGAGTTGCCACTTTAGAGGCTCGCGTTAGAGCTCTAGAGGAACAAGTTGCAACACTGCGTTCTATTGACAATCTTGAAAGAAGTCTCTTGTTAACTGAACAAGAACTAGCGGGGTCAGATAGTATGGGGGGAGGGGAGCAAGGAAAGGATGATAGGGCAGTAAGCTGGGTGACAGTTAGAAAATCTAGTGTGGGGAAAAGAAAAAGGGAGGCTGCTCCAGGGTTTGCGCATCCCAACAGATTTGCCAGATTGTGTGAAGAAGATGGGAGTGTGAACTCTGGACTGGCGGTTCTA…
ENSXETG00000020575	ptchd1	-0.15250810317292401	NA	ATGGTGAATCGCGCGATAATTATCGCGTCTATTTTAAAGGTATCAGTAACAATAACTTTGCTTTGTTTTTTTATTGAGGCCTCGAACTCCTCCCAAAAATATTTGTGTGTATTCTGGGATCCTGAGCTGAGTGGATGGTCCCAGAGAGGCTGCAATATGACACATTCCAATGTCTCCCACACCGTCTGCTCCTGTGATCATCTCTCCACCTTTGCGGTCATCATGGCTCCCTGTGATATAAAGAAAGATCGTGGCCTTCTCTTCATCTCACGCATTGGTCTTGGTGTATCTGTTCTCTGTCTCTTTCTATCTCTTGTCACATTCCTCCTGTGCCGGTCCCTAAGGAGCGCTCACACCTCCATGTTGATAGCACTATGCGGATGTCTCTTTCTGGGACAG…
ENSXETG00000002392	nelfa	0.1881614157110095	negative elongation factor complex member A [Source:Xenbase;Acc:XB-GENE-988837]	ATGGCGTCTATGAGGGAGAGTGACACCGGCCTGTGGCTTCACAACAAGTTGGGCTCCGCTGACGAGCTGTGGGCGCCCCCGAGTATCGCCTCCTTGCTCACCGCCTCCGTCATAGACAACGTGCGGCTGTGTTTCCATAACTTGTCCTCCGCCGTCAAACTGAAGCTGCTGCTGGGGATCCTGCACCTCCCGCGGCGCACAGTGGATGAGATGAAAGGCGCACTGACAGAAATCATTCAGCTCGCCACTCTAGATTCTGACCCCTGGATCCTGATGGTCGCGGATATCCTAAAATCCTTCCCTGACACAGGATCCCTGAATCTCGATCTCGAGGAACAGAATCCGAATGTGCAGGACATATTGGGGGAGCTCAGAGAGAAAGTCAGTGAATGTGAAGCA…
ENSXETG00000011065	tent2	0.18152576242337023	leucine rich repeat containing 74A [Source:HGNC Symbol;Acc:HGNC:23346]	ATGGCTGAGCTCTGCCAAAACATTGAGGCTCTTTCTCTGTGGCATTCCCTTACTCCTCTCTGCATTGCAATGTTAGAGAAGCCACACAATAAAGAGACATCTGGGGAGCTATATGTGCAGGCATGCCAAGAAGCTGGTGTTGTACCTGCCTCATATTTCATGCGCCACATGAATGACACAAGTATGGAACTTAAACATCATGGACTGGGACCCCGTGGTGCTCGGGCAATTGCTGCATCATTACTGTCCAATAAATGCATTACACACCTGAACCTAGAGGATAACTGGATTCAACCAGAGGGAGCTTCTGACCTGGTGGAGATGCTTAGAAAGAACTACTACATTCAAGACCTGGCTAATTTTCGCTTAACCGAGCTGGATCTGAGTCACAATGAGTTT…
ENSXETG00000025753	wwc2	0.1350471411937418	WW and C2 domain containing 2 [Source:Xenbase;Acc:XB-GENE-1001637]	ATGCCTAGGAAAGGGAATGGGCAGCTGCCTTTACCGGATGGCTGGGAAGAAGCGAGGGATTACGACGGGAAAGTCTTTTATATCGATCACAACAGCAGACAGACCAGTTGGATTGACCCAAGGGACAGGCTAACAAAACCTTTGTCATTTGCTGACTGCGTTGGCAATGAGTTGCCTTGGGGATGGGAGTCTTCCTATGATCCTCAGATTGGAGTCTACTTTATCAACCATATTAACCAAACCACACAGATAGAAGACCCAAGGAAGTTATGGAGGAACGAGCAAGAACGTATGCTGAAGGATTACCTCATGGTGGCTCAGGATGCCCTAAGCACACAGAAAGAACTCTACCACATCAAAGAGCAAAGGCTGGCACTTGCGCTGGATGAGTATGTGCGC…
ENSXETG00000028037	jmy	-0.34308362057032554	uncharacterized LOC100135188 [Source:NCBI gene;Acc:100135188]	ATGGATATTGAATTGCCACTTTTAATACTGTACAAAATACGAACAAGCCGCCTGTCGCAGAACAAAGAGCAGCAAAGGAGCGGGAGAAGCGCAGCGAAAAAGAGGCGCGTGTACTTGCGAAACGAAAGAAAGTTCCCCAATCGAGTGAATCTTCTCGATCTGAATGAAGAGGAGATTAAAGCAAGGTATCGATTGTCCTCCGAAGCCATTCAGTCCCTTTTTGAAAAAGTAAAAGAAAACTTGAATCCCAAAACAGAGAGAAGCCACGCCATTCCGGGCATCGTCAAGTTACTGTGCGCACTACACTTCTTCGCCAGCGGCTCTTTCCAGAACAGCGTCTCCACAGCCGGCGGCATCACGCAGTCCAGTTTCAGCAGATTTCTCTTCCAAGTCATACAG…
ENSXETG00000010090	klhl15	0.4246473314350916	merlin [Source:NCBI gene;Acc:100485014]	ATGTCCATTAGAGGATTGACTAGAAAACAGCTGAAAAATTTCAGAGTTAAAATTATGACTATGGATTCTGAGATGGAATTAACCTGTGAGATGAACTGGAAAGGTTCAGTCCTGTTTGGTTTGGCATGTGAAACATTGGGCTTAAAAGAGTCTTGGTTCTTCGGTCTACAGTTTACTTCAAATGGGATGGACACTTGGTTGAAGCTAGATAAGAAAATATTACAGCAAGATCTACCTAAAGAAGAGCCTACAAAGTTCCGCTTTTTAGCCAAGTTCTACCCTGAAAATGTTGCTGAGGAACTGGTACAAGACATCACCCGTCATCTGTTCTTCCTACAGGTAAAAAAACAGATTTTGGATGAAGAGATTCATTGTTTACCTGAGGCATCTGTTTTATTG…
ENSXETG00000006040	hras	-0.09874532843904704	Harvey rat sarcoma viral oncogene homolog [Source:Xenbase;Acc:XB-GENE-479381]	ATGAAAAGAACCCTTTCTGTTATATTTAGGGGTGGCACTATTGCCTCTTATTCCAGAACATCAATCCCAAGAGGGTCTTCAACAATGACGGAGTACAAGCTGGTAGTGGTCGGTGCTGGTGGCGTGGGGAAGAGTGCACTGACAATCCAGCTTATACAGAACCACTTTGTGGACGAGTATGATCCTACCATAGAGGATTCCTACAGAAAACAGGTGGTTATTGATGGAGAGACGTGCCTCTTGGACATCTTGGACACAGCAGGGCAGGAGGAGTACAGTGCCATGAGGGATCAGTACATGAGGACAGGGGAAGGCTTTCTCTGTGTCTTTGCCATCAACAACACCAAATCGTTCGAGGATATCCACCAGTACAGGGAACAGATTAAACGAGTGAAGGAC…
ENSXETG00000004994	lrrfip2	0.17705062634016336	leucine rich repeat (in FLII) interacting protein 2 [Source:Xenbase;Acc:XB-GENE-950912]	ATGGGGACTCCTGGATCTGGAAGAAAACGCACCCAAATTAAGGACAGGTTTTCTGCTGAAGATGAAGCTTTAAGTCATATTGCTAGAGAGGCAGAGGCAAGACTCGCCGCCAAAAGAGCAGCTCGAGCAGAAGCTAGAGATATTCGCATGCGAGAGCTGGAACGGCAACAGAAAGAGCTTACACATCGCTATCATGATAAAAAATGGGGACAGATCCAAAAGTGGATGTCCCACACCTACAGCAATTCATATGATGTCAAGAATACTTCATCCAGTTCTCATAGAGATCTGCTGAGTGGACTCTACCACGATCAAAGGAAATATACCAGCCTTAAGTATAGCAAACCAATCTCCACCCACCACACGAGGACCTCTCTGTACAAAGATGGGTTTTATAAT…
ENSXETG00000035319	ankrd45	0.05326046005021742	interferon stimulated exonuclease gene 20kDa like 2 [Source:NCBI gene;Acc:448477]	ATGGAGAGTGACGTCACAACCCGGAAGTTGGTTCACAGTTTCCTTTCCGCTTCAGCCCGTAAGCGAGGCAAGGAGATGATTTTCTCTCTCGCTCCACCCACGGGATGTTTTATATGCGAGAGAAAGAAGTCTGGGACTATGCAATTGTTTATTTTCACAGAGTTTTTTATACCCCCCGCCCCGCGATACGAGTCGGCCATGTCGGACCTGCTTTTAAACCTGAATGTGGGCGCCAGCCCGCCCTCTGGAAAGGCTGTACACACCAACGAGAAGCGTGCGCGCTCCCACACGCGAAGGAAGCTCTTGGAGAGGAAAGCTCTGCTGAAGCAAAAGCAGCGCCCTCCGAGACCAAACCGGTCTATGCCAAAGAGCGCCCCGGGGCACCAGGCCAAGTCGTGG…
ENSXETG00000006830	dnajc16	0.027732202929642596	DnaJ heat shock protein family (Hsp40) member C16 [Source:Xenbase;Acc:XB-GENE-6035331]	ATGGGCCATTGGAAATTACGCCTCCTTTGCTGGTTTCTGCTTTTCCTTGTCTTGGCTCTGAAGATCCTGTCAGCTGCAGATTTTGACCCTTATCGGATCCTTGGAATCAGCAAGTCAGCTAGTGATTATTCTCTTTCCCACTATTTAGGGGTTGGAATAGGAGTCGTCCATGCCGGTTACGAGAGAAGACTCGCTCACCACTTGGGCGCACACAGCACCCCTTCTATTCTAGGAGTAATTAATGGCAAGATTTCATTTTTTCACAATGCCGTTCTCCGGGAAAATCTCCGACACTTTGTAGAAAGCCTTCTTCCTGGGAACCTCGTGGACAAGATCAATGACAAAAACTACATTCGGTTCTTGTCCAATTGGCAACAAGAGAATAAACCTCATGTGTTA…
ENSXETG00000018471	ctdspl	-0.18162741860330262	CTD small phosphatase like [Source:Xenbase;Acc:XB-GENE-1013061]	ATGGACAACACATCTATCATCACCCAGGTCTCTAACCCCAAGGAGGAGGGAATCCTGTCTTGTGCCCAGGAAAAGGTCTCCCAATGCAATATTAGCCTAAAAAAGCAGCGGAACAGAAGCATCTTCAGCTCCTTATTCTGCTGTTTCCGCAGTTACAGCGTAGAGCCACCAACCTCAAATAATAACAGTAGCCCCCTTCCTCCGCTGGTGGAAGAAAATGGGGGCATTCAGAAGGCAGATCAGACTCAAGCCCTTACCATTCCTAGTCCACCTGCTAAATACCTCCTCCCTGAGCTGAAAGTATCCGATTATGGAAAGAAGTGCGTGGTCATCGACCTGGATGAAACCTTAGTGCACAGTTCATTTAAGCCTATAAACAATGCAGACTTCATAGTTCCT…
ENSXETG00000035435	dmgdh	0.13051759141296312	NA	ATGGAAAGGCTTCTTATCTGGAAAACTCCAGATCCCGAGCATTGCCCATACCTGTACATGGTATATATTTATAAAGGTTATCTTCAGTTCCTCTATAATGAGGTCTCATGTTTGCTTTCCAGTGAAGTGTTTAAAACCTATAATGTGGCCATGGATTACATCACGCTGGCTTTAATGATCTGGAATTTTGGCGTAGTAGGAATGATCTGCATTCACTGGAAGGGGCCCCTTCTTTTGCAGCAGGCATATCTTATTATGATTAGTGCTCTTATGGCGCTGGTGTTTATAAAATACCTTCCTGAGTGGACAACTTGGCTCATCTTAGCAGTGATATCTGTTTATGATCTTATTGCTGTCCTGTCTCCAAAAGGACCTTTACGCATGCTGGTCGAGACAGCT…
ENSXETG00000011054	ankrd34a	0.09586478118358097	ankyrin repeat domain 34A [Source:Xenbase;Acc:XB-GENE-6035402]	ATGCTTTGGAACTACGAGAAAAGAGATGGTTGTGAAACGCTCCCCAAAACCCATCTGTGTCTTTGCTTAGCAGATACTGTATCTGTTTGCACTTTACCAATGAGAGACTCTAACATGTTGCACCCAGAGGGCAGTGCCTTACTGAAGGCTGTGTGGCAGGGCAAATTCAGACTGACGCGCCTTCTGCTGGAAGGAGGTGCCTACATTAACGAAGGTAATGCCCAAGGTGAGACACCTCTAATGGCAGCCTGTTTAGCCAAATATGACGACCCTCAAAACAAATCCCGGATGGTAAAATACCTGCTGGAGAATGGGGCAGACCCTAACATGCCGGACAAGATGGGAAAAACTGCACTTATGCATGCCTGTTGCAATGTAACTGGCGCAGCGGTGGTATCT…
ENSXETG00000010597	nup205	0.23504791907885267	nucleoporin 205kDa [Source:Xenbase;Acc:XB-GENE-1009711]	ATGGCGGCGCAGTTGGCGCTAAATTCAGAAGCCAGCCTGTGGGGCCCTTATAGAGAAATATGGCAGACCGTGGTGGGCGCGCTTGTGAAGAGGCAACCGGAAGCCATTCATTCGCTCGATATCGTCTTAAAGAAATATAAACCGGACTTCATCTCTCTCTTCAAAAATCCACCAAAGAGCGCTCAGCAACATGAAAGAGTGCAGAAAGCCAGCAGCGAGGGGATTCCTATTAAAGGGACGCAGCGGACCCGGATCCTGGAAGGACAGCTCATTAAGGAAGCCTTCATCCTTAGCGACCTGTATAATATCGGAGAGGTGGCAGCCGTAGAACTTCTACTTTTAGGTGAGCAGCAGCAGCCTACCTTCCATGGCCTGACGAGGGGCTTGGTAGCCATACTG…
ENSXETG00000040299	NA	0.5248295517806816	NA	ATGGCTGAAGCAGCTGAGACGGCGCCTGCTCCTCCCCCGGCTGAACCCGCAGCCAAGAAGAAGAAACAGAGCAAGAAAGCAGCGGGGGCCACTAAATCCAAGAAGCCATCTGGGCCCAGTGTGTCCGAACTGATAGTCAAAGCCGTATCCGCTTCCAAGGAGCGCAGCGGGGTGTCCCTGGCAGCTCTGAAGAAGGCTCTGGCTGCAGGAGGTTACGATGTGGAGAAGAATAACAGCCGCCTCAAGCTGGCTCTCAAGGGCTTGGTCAGTAAGGAGACCCTTGTCCAAGTGAAAGGGAGCGGAGCCTCCGGGTCCTTCAAGCTCAACAAGAAGCAGCTGCAGAGTAAGGAGAAGGCGGCACCGGCAGCAGCCAAAGCCAAGAAACCGGCAGCAAAGAAG…
ENSXETG00000011067	irf2bpl	0.16741381479844267	interferon regulatory factor 2 binding protein-like [Source:Xenbase;Acc:XB-GENE-968642]	ATGTCGGCCGCACAGGTCTCCTCCTCACGCCGCCAGTCGTGTTACCTGTGTGACTTGCCACGGATGCCATGGGCTATGATCTGGGACTTCACTGAGCCAGTTTGTCGCGGCTGTGTCAACTATGAGGGGGCAGATCGAATAGAATTTGTCATTGACACTGCTCGGCAACTGAAACGCAGCCACAGTTTCCAGGATGGTCGTTCACCTGGACCCCAGGGCCCCGGCTCAGGAGCAGCCAACAAACAGCACCCAGCTGTGCAGGCAGCCCTCACAGCAAAAGATACTGCCCAGCTAAACCATTTAGATGGGGCTACTAAGGCAGCAGCTGCCTCTGGGCTGGAGAGATACGGATTGGCCACAGATCGAGGTCGCTTCGAGTACACATTAACTGCTCGGCTT…
ENSXETG00000011817	slco2a1	-0.06291019724006222	solute carrier organic anion transporter family member 2A1 [Source:Xenbase;Acc:XB-GENE-5814577]	ATGGGAATCAAACTGGTAGATAGCAAGGCAGACAGTAAATCAATAACTGGCTGCAAGAAAGGAATCTTCAACAATATTAAGGTGTTTGTAGTTTGTCATGCTCTCCTGCAGCTTTCTCAGCTGTTATACAGTGCTTACTTTAAGAGTTGCCTGACCACCATTGAGAAACGATTTGGGCTTTCAAGCTCCTCCTCTGGCCTTCTCTCCAGCATCCATGAGATCAGCAATGCAGTTCTTATCATCTTTGTCAGCTATTTTGGAAGCCGAGTTCACCGGCCACGAGTCATTGGTGTAGGAGGCCTTCTGCTGGCCTTGGGGACCTTTCTTCTGACGGTGCCTCATTTTGTATCAGAGAAATATCAGTACACTGAGCTAAATAGCGGAAACAGAAGTCAAGTT…
ENSXETG00000011053	polr3gl	0.25448461109491627	polymerase (RNA) III (DNA directed) polypeptide G (32kD)-like [Source:Xenbase;Acc:XB-GENE-945834]	ATGGCTGGAAAAGGCAGAGGTAGCGGTCGGGGCCAACTGACCTTTAATGTAGAAGCTGTTGGAATTACCAGAGGGGAAGCACTGCCGCCACCCACTCTCCAACCTCCCCCGTTGTTCCCGAACCTGGAATACAAACCAGTACCCCTGCAGACAGGGGAGGAGGTGGAATATATGCTGGCGTTGAAACAAGAACTCCGAGGAGCCATGAAGACTCTCCCGTACTTCATCAAGCCCGCTGCTCCCAAGAAAGATGTGGAACGCTACTCTGATAAATATCAGACGTCTGGACCTGTTGACAATGCTATTGACTGGCAACCCGATTGGAGGCTGCTGCCACGGGAGCTGAAAATAAAAGTCAGGAAGCCGCAGAAAGACAAGTCCGCCGTTGTCCTCCCCAAA…
ENSXETG00000013902	mgc147631	0.33631688115924563	acyl-CoA dehydrogenase (3J649) [Source:Xenbase;Acc:XB-GENE-5814061]	ATGACGTTGAAATGGGCCTCCCTACTGAGACGCTGGCCAGGCTTCTTTTCAAGGTTGCCCACTGGCCCCATCTACCAAACAGCTGCCAACCAGTCCACCCTCCAGGCACAGAATTCCCTCTACACCCCGGATCACATTGCCATAAGGGAGACCTTGAGAAAGATAATTGACACTGAGATTAATCCCTATGTCGACCAATGGGAAGATGCTGGGCAGTTCCCAGCTCACAAAGTCTTCAAAATCCTTGGCAATGCTGGGATATTGGGAGTAAATAAACCAACAGAATATGGAGGACTGGGTCTGGACTTTTCCTACAGTATTGCAATTGCAGAGGAGCTTGGCAATATTCGCTGCGGTGGGGTCCCTATGGCCATTGGTGTTCAGTCAGACATGGCTACA…
ENSXETG00000010931	nelfe	0.048340014438889994	negative elongation factor complex member E [Source:Xenbase;Acc:XB-GENE-482911]	ATGTTGTATATTATATGTGACATCTGTTTGTATCAATATTTATCTACAGAAGTACCCCTCTGTGCAAGCATCATGGTCCTGCTACCAACCAGCCTTACAGAAGAAGAGGAGGCTTTGCAGAGGAAGTTTGCAAAGCTGAAAAAGAAGAAAAAAGCCCTTCTTGCTTTAAAGAAGCAAACATCCACGAACCAGACAAGCCAGACGGGAATAAAAAGATCCCTCTCAGACCAGCCTGCAGTTGACACAGCTACAGCTACAGAACAAGCAAAGATGTTGGTGAAGACTGGAGCAATCAGTGCTATAAAGTCAGGGACAAAAAACAGTGGCTTCAAACGTTCTCGTACTTTGGAAGGCAAACTCAAGGACCCTGATAAGGGACCTGTTCCAAGCTTCCAGCCT…
ENSXETG00000021857	rbm25	0.2798201522975473	RNA binding motif protein 25 [Source:Xenbase;Acc:XB-GENE-490152]	ATGAGTTTAATGGCACCTGGACCAACTGTATTGGTACCAACAGTATCTATGGTTGGGAAACACTTGGGGCCTCGGAAAGACATGATTGGGCTGAAAAATAAAGAAAATGATGATAACAGTGGCCCAACTACCACAGTGTTTGTGGGAAACATATCTGAAAAGGCATCAGATATGCTCATCAGGCAGCTTTTAGCTAAATGTGGCTTAGTCTTAAGCTGGAAGAGAGTACAAGGAGCATCTGGGAAACTTCAAGCCTTTGGATTTTGTGAGTACAAGGAACCTGAATCTACTCTGCGAGCTCTACGGCTTCTTCATGATCTACAAATTGGGGAGAAAAAGCTGCTTGTAAAGGTTGATGCCAAGACCAAAGCTCAGCTGGATGAGTGGAAAGCATCTAAA…
ENSXETG00000011071	cipc	0.03566689922708796	CLOCK-interacting pacemaker [Source:Xenbase;Acc:XB-GENE-5806252]	ATGGAGAAGAATCAGAAATATGCAGCTGGACAAGAAAGATTTCAGATTAGGTCAGGTCATGGGGATGGTCAGAGATCAGAGCCCAGGAAGACACAAACTATTATAGAATCTGACAAGGACTCTGGCTACTCAGATGTTGCATCAGAGTGCCTAAGCTCTGTTGAGCAGACTGATTCAGAAGAGGGTCCAACTACATCACGCTGCAATTTAGCATGGAGCCCCTCAGGCAAAACTCCATCGCAACCACATTCATTGGTCGTCTTGAAAAACCTGCTTGTTGATCAGGGGTCCGGCCCTGAGCCTAATGCCAGCTCCTGGGCTGTCCGCCCTTCCTTTCAACTGCTTCAGACTTCTCCACAGATCCTCTTTTTTCCCCAGACTGTGTCTTCTGCCAAGCCA…
ENSXETG00000031184	xylb	0.13342637947787303	xylulokinase homolog (H. influenzae) [Source:NCBI gene;Acc:100486367]	ATGGGCAGCCAGCGAATGGGAGGATACGCTACATGGATTAAAACCCCTGGAAGAGCTGCCAGTGCTCAATTCCAAGTTTTAAAGCCTAAAAAGGATTATAGGGCTTTATACCTTGGCGCATACAAGGATATTGCACAGCTAAAGGTAATTGCCATTAATGAAGGCCTGCAGGTTGTTCTTGAAGATAATATCCAATTCGACAGAGATTTACCAGAGTTTGGGACTCAAGGTGGCATTCATACTCACAGGGATAAACTGACTGTCACATCCCCAGTCTTAATGTGGGTTAAGGCACTGGATATCATATTGGATAGACTAAAATCCTCTGGATTTAATTTTGGCAAAGTCAGAGCTCTATCAGGCTCAGGACAGCAACATGGCAGCGTCTACTGGAAAAAT…
ENSXETG00000019927	crabp2	-0.026219093793624554	cellular retinoic acid binding protein 2 [Source:Xenbase;Acc:XB-GENE-959098]	ATGCCCAACTTCTCAGGACACTGGAAAATGAAACAGTCGGACAACTTTGAGGAGATGCTGAAGGTTTTGGGAGTGAATATGATGCTGAGGAAGATCGCTGTTGCTGCCGCTTCTAAACCAGCAGTGGAGATCAAGCAGGACGGAGAAGTCTTCTACATCAAAACCTCAACAACGGTTCGGACCACCGAGATCAGCTTCAAAATTGGGGAGGAGTTTGATGAGCAGACAGTGGATGGGCGCCCTTGCAAGAGTCTGGCGAAATGGGTGAGTGAGAACAAAATGGCTTGTGAACAGAGACTTCTCAAAGGGGATGGACCCAAAACAGCCTGGACCAGAGAACTGACCAACGATGGAGAGCTTATCCTGGTAAGTCATTTATATAACATAGTCCCAACTGCA…
ENSXETG00000011050	txnip	0.3323878088740819	thioredoxin interacting protein [Source:Xenbase;Acc:XB-GENE-968442]	ATGGTTGTCTTCAAGAAAGTCAAGTGCTTCGAAGTGTCCTTCGCCGACCCGCAGAAGGTGTACTGCGGCGGGGAGAAAGTAACCGGCAAGGTCCTGGTGGAGGTGGCCGAAGTGACCCGGGTGACAGCCGTCAGAGTGTTGGCTTGTGGAGTGGCCAAAGTATTGTGGTCCCAGAACTGCAAGCAGGAGATGGAGTACTTGAGATTTGAGGACACCTTGCAGATGGAGGAGCAGCCTACAGATTCCGATGGATCTGTCATTATGAGGCCAGGCAACTTCTATGAATACAAGTTCGGTTTCGAGCTGCCCCAAGGTCCTTTGGGGTCATCATTCAAAGGAAAGTATGGTTCTGTAAAGTACTGGGTTAAAGCTTTCCTCGATCGGCCATCCCATCCTCCC…
ENSXETG00000006929	stard4	0.495583783314514	StAR related lipid transfer domain containing 4 [Source:Xenbase;Acc:XB-GENE-5944117]	ATGGATGATCTTGATATCCCTTCAAAAACCACCAGATTGCAAAATACCTTAATTCAGTACCACTGCATGCTTGAAGAGGAATGGTGTTTCGCCAAGAAATCAAGTGGAGTTACAGCATGGCGAAAACCTTCTGAGGAATTCGGTGGTTGCTTGTACAAAATTGAAGGAATAGTGGAAGATGATTATAACAGAATTGTGGATTACATTCGCCCAGGACCTTACAGACTGCAGTGGGACAGCTTAATGACCTCAATGGATATAATCAAAGAATTCAGTAAGGAGTGCTGTGTGATGCGCTACACAACTGCTGGGCAGCTGCTGAATATTATATCTCCTAGAGAGTTTGTTGACTTTTCCTACACAACGCAGTATGAAGATGGCCTTCTGACTTGTGGTGTT…
ENSXETG00000015575	nrxn2	0.3384334594509357	neurexin 2 [Source:Xenbase;Acc:XB-GENE-6039577]	ATGTGGTCCCTTCTCTGCCTCTCTTCCCTCCTTTCCCTCCCCCTCCGCTCCTTTTCCCTCCAGTTCCAAGGGGCCCCTGGCCAGTGGGTTCGGTATTCCCGGCCTACATCAGCTAGTGGCAATGGAGGTTGGGGAGAAGACCTTAATTTTCGGCTTCGGACAAATGCCAGCCGTGGCCTGCTTCTTTACCAAGATGATGAAGGGGACTGTGATTTTCTTGAGCTAGTTTTAGATGGAGGACGCCCACGCCTAAGGTTTTCCATCTCTTGTTCTGAGCCTGCGGTTGTCCGCTTACCTCGAGTAGTATCAGATGGCCTTTGGCATGCAATAGTAATTGGTGGAAATGGCCGTGAAGGCTGGCTGTCTGTAGATGGAGAGAGGGGAGTAGCTGAAGTACGG…
ENSXETG00000035354	NA	0.11884226724203292	NA	ATGTCTGGCAGAGGCAAGGGCGGTAAGGGCCTGGGGAAAGGAGGCGCCAAGCGCCACAGGAAGGTGCTGCGGGATAACATCCAGGGGATCACCAAGCCCGCCATCCGCCGCCTGGCACGCAGAGGGGGAGTCAAGCGCATCTCCGGCCTCATTTATGAGGAGACTCGGGGGGTGCTGAAAGTTTTCCTGGAGAACGTTATCCGGGACGCTGTCACCTACACCGAGCACGCCAAGAGGAAGACTGTTACCGCTATGGATGTGGTGTATGCTCTCAAGCGCCAGGGCCGCACTCTCTACGGATTCGGGGAGGGGGAGTCAAGCGCATCTCCGGCCTCATTTATGAGGAGACTCGGGGGGTGCTGA
ENSXETG00000017985	anxa3	0.4364518852564312	annexin A3 [Source:Xenbase;Acc:XB-GENE-953000]	ATGGCGTCAGTGTGGGTAGGCAGCAGAGGAGCTGTGAAAGATTTCCTAGGATTCAGTGCTGGCAGAGATGCTGATGCTATTCGAAAGGCAATCAAAGGATTGGGAACTGATGAAGATTCACTAATCAACATTCTGACACAAAGGTCCAATGCACAGAGACAGCTAATTGTAAAGGAATATCAGGCAGCCTGTGGGAAGGAGCTAAAAGATGATTTGAAAGGTGATCTTTCTGGCAACTTTGAACACATTATGGTCTCCCTTATATTGCCACCAGCTTATTTTGATGCAAAGCAGCTGAAAAAGGCAATGAAAGGCACGGGTACAGCAGAAAGCATCTTAATTGAAATTCTAGCATCAAGAACCAGCAAACAAATGAAAGAAGTAGGAGATGCCTACTAT…
ENSXETG00000034609	lhfpl2	0.23446093558096623	sperm tail PG-rich repeat containing 2 [Source:HGNC Symbol;Acc:HGNC:28712]	ATGTTAGTTAGGATCAATTACAAGGTACTGTTTTATTACTACAGAGAAAAAGGAAGGCTTTCCTTTTTATTTGACTTTCCCTTAAAAATATCACTATTGCTTGTGCAGGTGATTCAAAACCATGTTAAAAAGCAGCATGAACAATGTATTCCGTCAATTCCTATACCTGGGAAAGCCTTTGGGTATGAAGAGACTGCAGATGGTTTTCTTGTCAAGCAACTTCCACCTGAAAGAGACGATACTTTGGGGCCTGCCTACTATCAACCTATTCATAATGTGGCATATGCGACTTTGAAATATAAAGGTTCACACTTTGGAAAGTACACTGGCAAAAGGCTTGAATATCAGTGGCCTGAAGGTCCTGGGCCTGGTGAATATGAAATAGATCATGCACTGCAT…
ENSXETG00000034191	sucla2	-0.22741364553197235	zinc finger DHHC-type containing 22 [Source:NCBI gene;Acc:100489922]	ATGGTTCTTCTTAAACTGCTGAATCTTCTGGCTCCACTCTATTTCCTCTGCCTGCTATCAGTTACTTTATCCATTCAGTTCTTCTTACTACTTCCTGGCATAAGTGGGGAAACTTCATCTACCTTGTCTTTCTCTGGTTTTATTCACAATTCCCTCTTTGTTGTTTTACTTGTCAATGTGTTGGGAAATTATATACTGACAATCTGGAAGAGTCCTCATGGCAATGCAATGTATGCAGAAACTGAGCTATCAGGAAAACCATTTTGCCATCTTTGTGCCCGGGTGATGGGCGAACAGGAACATCACTGCTTTTTCACAGGAACATGTATAGGACGCAGCAATCTTCGTAGCTTTGTTCTGTTTTGCCTGCATGCTTCCTGCAGTTGTTTTCATGCTATG…
ENSXETG00000037568	med4	-0.07722096148059066	ubiquitin specific peptidase 2 [Source:NCBI gene;Acc:100216064]	ATGTCCCACTCTTCCTCTACCCTCAAGAGATATACAGATACATCTTATACCAAAAGTTATGGGAGCTTCAGCTCATACACCTCCAATCTCAATTCATCCTACATTGACCGTGATAAAATCCCATATAAGACAAGTTTTGGTAGCTCATATCTTTCCAGTTCCCCACATCTCCGATCCTACCCAGAGTTGGAGCGAAGCCTTCCTCGTCTAGATGTAACTAGCAAAAGGACTGACATTGTGGGACGTTCTACATCCAAATATGGGACGAGTAATTTCCCCACATACTCCTATGGCTACAACACTACATACTCACCCATTACAGCCTCTCCCGTCACCTCTCTGACACGCAGAAAGTCCTCCAGTCACACAGACCTGTCCCATGGACTTTCAGAGTTGCGG…
ENSXETG00000032054	Tmem17-b	-0.30010130314498856	transmembrane protein 17 [Source:NCBI gene;Acc:100124937]	ATGGCTCTTCTTACTCCACTGCCTGGCAGCGTACGGCATGGACTTGCCAGAATTAGTGGATCTCTCTTCATTCAAAATAAGACCAGAGACTGTGGAGAACAACATGCATATCAGTCAGGCCATGACCTACTGTCAAGCCTTCCACTACAGATGATGTTATATTTCAATGCTTTCTTTTTTCCTTTCTGGATTATATCAGAGATCATTACCATGGAACTCAAGTTTGGTCGGCTGTCTGGTTACTATCAAATTCTTCTGACCACATCCTTGGTTATTCTTACATTAGTAGAAAGCTTGAGATTGTATATTGGATATGTTGGAAATTTACATGAAAAGGTTCCAGAACTGGCTGGCTTTTTGATCCTGACCCTTTTAATACAGTTGCCTCTGCTCTTATTC…
ENSXETG00000012888	eya3	0.2322613045245608	EYA transcriptional coactivator and phosphatase 3 [Source:Xenbase;Acc:XB-GENE-486218]	ATGTCGGCCATGGAGGATGGACAGGATTTAACAGAGCAGCCGGTAAAAAAAGCCAAAATGCAGGATTCTGGAGAGGAAGGTTTAAGTCAAGTGGGCAACAATGAAACTGGTGATCGAAAAGCAGAGACATCTTCAAATATGTCATCAAACCACACGATACCTAGTGAAATCCTGCCCTGTGCAGATTACATTCTACGTGCAAATGACTATACATCACAGATCTATCCTGCAAAACCATATACCCACATCCTTTCAGTACCTGTAGCAGAAACGGTGGCAGCGTATACTGGACAAACACAGTATCAAACATTGCAGCCATCTCAGCCATACACAGTTTACCCTCAGGCTTCGCCAACGTATGGTCTACCTCCCTTTGGAGCTCTGTGGCCGGGTATTAAA…
ENSXETG00000019917	dnaja4.2	-0.14811198566418654	DnaJ (Hsp40) homolog, subfamily A, member 4, gene 2 [Source:Xenbase;Acc:XB-GENE-5891666]	ATGCTTTCCAGAAGAGCAAACATGGTAAAGGAAACTGGATATTACGACCTGCTTGGCGTAAGGCCCTCTGCGTCCTCAGAAGAGATAAGGCGAGCGTTCAGACGCCTTGCATTAAAGTATCACCCTGACAAGAACCCCAGCGCTGGGGAAAAGTTTAAACAGATCTCCAAAGCCTATGAAATTCTCCACGACTCGCATAAAAGAGAACTGTACGACCGCGGCGGAGAGGATGCCCTCACAGGCAACAGCACGGGGTGCAGGAGCGCCTTCGATTCCCCATTGGACATATTCAACCTGTTTTTTGGTGGCAGCACTAGAGTACACCATCAGGCAGAGAGGAAAGGGAAGAGTGTAGCCCACCACCTTCCTGTGTCATTGGAAGATCTGTACAATGGTGCA…
ENSXETG00000040701	HJV	-0.02066280887827046	hemojuvelin BMP co-receptor [Source:NCBI gene;Acc:100493945]	ATGGGTAAACGCCATCTTCCAACATGTTTAGACAGTGTCCTTTTCAAGACGGTCCTTCTGCTTATCTTCTGCGAGCAAGTGAATGCCCAGTGTAAGATCATCAAATGCAATTCAGAATATGTGTCTGCTACATTAAACTTGAGGGGTTCCGGCAGAAATGCAGAGATTCAAAAGTGCAATGCCCTGCGCTCCTATTCCCAATGTACCCGCAAAACTGCCCGCACCTGCCGCGGAGACCTGATCTACCACTCTGCAGTGCACATCATTGAAGATCTCATGATTCAGCACAACTGTTCCAAAGAGGGGCCTACAGCATCACCCAGGCCCCAACCTCCCCAGCCTCGCCCCGAAGGCCCCAGGAAACAGGAGGCCTGTGATTATGAGAGAACTTTCCGCGAG…
ENSXETG00000036100	NA	0.3446410466560228	platelet glycoprotein Ib alpha chain [Source:NCBI gene;Acc:101730428]	ATGAGACGTTTGCTCTCGTTGGTCCTCATTCTCTTGGCCACTTGGCCGGCCTGCTCCCCTTCCTGCACCACTGAGAAGAACGTAGTGAAGGACAAGCAGGAGACCCAGTGTACGCACATGGCTCTCACCTCTGTCCCCATAACGGATATCCACAAGGACACCGCCATCCTCATCTTGAAATATAACGACTTGAAATCCGTCACTGCCTCCACCTTCAAAGGTCTCTCACTGCTGCTGGAGTTGGACCTGTCTAACAACGCAATGACCAATTTTAAGGTAGAATTTGCACTGGGCTTGGAAGAACTCAACTTGGCCAACAATTCATTGGACCACATCCCAAACCTCTCCCTGCTGACCAACCTGAACAAGCTCATTCTGTCCCACAATCGCATCACCTCC…
ENSXETG00000030784	lyrm7	-0.11620075634218269	LYR motif containing 7 [Source:NCBI gene;Acc:100124785]	ATGGACAGTAGGATGAAGGTGTTAAAACTATTCAAAACGTTGCATCGTACAAGGCAGTGTGTATTTCAGAATGATTGTCGCGCCCTGGAAGCTGCCAGACGAAGAATCAATGAAGAGTTTAAGAAAAACAAAAGTGAATGTTCTCCTGCCAAAATTTCAGAGCTGCTGAAATTTGGAACTGATGTTGAAATTGTTCTCAGAACATCTGTTGTTCAGGGCATTCATACAGATTCAAATAAATTAGTGCTGCAAGCAAGGAAAGACCTTCTTTTAGATAATATACCATTTTGTGATGCACCGGAGAAGCAAACATGA
ENSXETG00000040808	NA	0.55508262770502	NA	ATGTCAGGAAGAGGCAAACAAGGCGGGAAGACCCGGGCAAAGGCCAAGACTCGCTCATCTCGGGCTGGGCTGCAGTTCCCAGTCGGCCGTGTTCACCGGCTGCTGAGGAAAGGCAATTATGCTGAGCGGGTGGGAGCCGGAGCTCCAGTCTATCTTGCCGCAGTGCTGGAGTATCTGACCGCTGAGATCCTGGAGTTGGCCGGGAACGCTGCCCGGGATAACAAGAAGACCCGTATCATCCCCAGGCACCTGCAGCTCGCTGTGCGCAACGATGAGGAGCTGAACAAACTGCTCGGAGGGGTGACTATCGCTCAGGGCGGTGTCCTGCCCAACATCCAGTCCGTGCTGCTCCCTAAGAAAACCGAGAGCACCAAAGCGTACTTCAAAGCTAAATAA
ENSXETG00000006039	lrrc56	-0.09995471320931515	leucine rich repeat containing 56 [Source:Xenbase;Acc:XB-GENE-6045468]	ATGTCCCACATGGATCTGGATGTGCGTCCTGGCACTGCCAGTGTCAAGGTGACAGATCTGGGTTGGCAAGGATTGCTAAACCCCTTTCCACTAAACAAAGATGAAGATGATGATCTTGAGGATGAGTGCCTCACACCTGCTAAGCTGCGACTTCTCACCGGTGTGGATGATCTACAGGAAGTTACAACGCTTCAGATGTGTGTTAACACCAGGGAGAACAGTCTTGGGAATTTTGGTGAGGACTATTCCTTAGGTTCTCATCTTCCCAACCTAAGGCAGCTGAAACTAAATAACAGTATCCTCACATCTGTGAGAGACCTTGGTACCTCTCTGTCACAGCTCCAGGTGCTATGGCTGGCTCAGTGTGGCCTTACCGACCTTGATGGCATTGCCTCCTTG…
ENSXETG00000034971	rcbtb2	0.267935737131788	NA	ATGGCTGTTCCCCCTCCGATACGCGTCGTGACCATTAATGTCGCGAGCGTTAAGTCTGTAGGTGCAAGAGACACGGCCTTCTTTTTTCTCTCCCGAGTTGAGGCAGACATTTTATTTTTGCAAGAGACCAGATTATGCAATCTTCAGGTGCTCCATAGGGCCAAGAAGGAATGGGTGCACGGTCCTTCTTACTGGTCTCTTGCGGCCGAGATGTACAGCGGAGTGGCGGTCCTTTTTAAGACCAGTAAGGTAACAGTCAAACGGGTGATTGAGGTAGAGATGGGCAGATGTATGGTCTTAGACGTCCTGCTGAATGGGCAGAATCTTCGCCTTATTAATGTGTACGGTCCTCAGACCCTAAAGGCGAGGAGGGACCTGTTTAGCAGGATTAAGCCCTTT…
ENSXETG00000017786	mtm1	0.018963803923736616	myotubularin 1 [Source:Xenbase;Acc:XB-GENE-1002030]	ATGGCCTCGAACTCCACACCAAAGTATAATTCAAACTCGTTAGAAAATTCTCTCCGAAGGTCTCCAGGAGATGGTATGAACCATGAACAAAACGATGAAATACCATGTCTGCCAGGAGAGGCCTTAATTACAGACAAAGATGTAATCTACATGTGCCCATTTTATGGTCCTGTCAAGGGGAGAATACATGTTACAAACTATAAACTGTACTTCAAAGGTGAGGAGATGGAGCCATTGATATCTTTCTCTGTTCCACTTGGTGTCATTGCGCGGATAGAAAAGATGGGGGGTGCATCAAGTAGAGGAGAAAATTCATATGGTCTTGACATAACGTGCAAAGATATGAGGAATTTGAGATTTGCTCTTAAACAAGAAGTTCACAGTAGAAAACAGATATTT…
ENSXETG00000034920	coq10a	-0.16836748018804476	coenzyme Q10A [Source:NCBI gene;Acc:780028]	ATGGCCGCCTCCGGTGCTACTCGCTTCTCTGGCCTAGGCGCGCGTTCCTTCAGCGACTTTGTCGGGATCGCGACATTCCAGGGGCTCCGGGGGTGCCGGACGCGAGCGCACCGCCACCCAATCAGACATTTGTCTTCCTGTGGCATTGTCATGACCAGAGCTTCTAAAAGGGATGTACAAGATATCAGCAGTCCATGTATGCAACCGTGCCGCAGTTTTCTGGGCTTCACTGGACCATTAACTAACAAGAGGAAGGAATACTCCGAGCGTAGAATTATGGGGTACTCCATGCAAGAGATGTATGAGGTGGTGTCCAATGTAGAAGAATATAAACTGTTTGTGCCTTGGTGTAAAAAATCTACAGTAATTTCCAAGCGCACAGGATATGCAAAAGCACAG…
ENSXETG00000041348	c3orf67	0.18931710750263528	complement component 2 [Source:NCBI gene;Acc:100491079]	ATGGTGTGCCCTCAGCCTGAGGCATTTGAAAATGGTGAGTTTTTTCCCAGGGGGCCCTACTACGTTGGGGCAAATGTAACATTCAACTGTAATGATGGATACACCTTGAGGGGGTCTGCGGAAAGAACATGTGGAAGGAATGCCAGATGGAGTGGAGTGACTGCAGTTTGTGATGATGGAGCTGGTCATTGCCCTAACCCAGGTATACCTCCTGGTGCTATGAAAACTGGTGTTCGATATGACATGGACAACAGCATTAAATATGCTTGTTCCCGTGGGATGTCACTGGTGGGGTCACCCCACAGGACATGCCTAGAAAGCAGACGGTGGAGTGGAACAGAAATAAGCTGTCAATACCCATACTCATTTGATCTACCAGAAGATGTGCAGGAGCAGTTT…
ENSXETG00000034616	bet1	-0.058392062196486544	Bet1 golgi vesicular membrane trafficking protein [Source:NCBI gene;Acc:549196]	ATGGACCGGGGCGGTATGAAGCACCGGGAGGGGGGTCCGAGAACAGAAATGAGCGGCTACAGTGTATACGAAGAGGAGAACGAGCGGATGACTGAGAACCTGAAAATGAAAGCCAGCGCTTTGAAATCTCTTACCATCGACATTGGAAATGAAGTGAAATATCACAATAAAATGTTAGGAGAAATGGATTCAGATTTTGACTCAACTGGTGGACTTTTAGGTGCAACGATGGGCAGACTGAAGATTTTGTCCCGAGGAAGCCAAGCAAAGCTTCTTTGCTACATGATGCTCTTTGCCTTATTTGTTTTCTTTGTTATTTACTGGTTTATTAAACTGAGGTGA
ENSXETG00000011046	nr2f5	-0.1698125095583371	nuclear receptor subfamily 2, group F, member 5 [Source:Xenbase;Acc:XB-GENE-486334]	ATGGCCATGGTGGTTAACCCTTGGCAGGAGGACATTCCTGGTGTGCCAGGGTCTCAGGTGAACAACCCACCAGGGCTCTGCAATCAAGATCCAGGGGGTACCCCTCAAACGCCCACCACCCCGAAAGGAGGTGTCCCTGGTCAGGATCCTGTTCATTCTGGGGATAAAGGCGTACCGAATGTGGACTGCTTGGTGTGTGGGGACAAGTCAAGTGGGAAACACTATGGACAGTTCACCTGTGAAGGGTGCAAGAGTTTCTTTAAGAGGTCAGTGAGGAGGAACCTGACCTACACGTGTAGGGGCAACAGAGACTGTCCTATAGATCAGCATCACCGTAATCAGTGCCAGTACTGCCGCCTGAAGAAGTGTCTCAAAGTTGGCATGAGAAGGGAAGCAGTC…
ENSXETG00000008278	hint1	1.0717724717459507	histidine triad nucleotide binding protein 1 [Source:Xenbase;Acc:XB-GENE-1014427]	ATGGCTGATGAGATCAGCAAAGCCCAGACAGCCTGCCCAGGGGGAGATACTATCTTTGGGAAAATTATCCGCAAAGAAATCCCGGCCAAGATCATCTATGAGGATGAGCAATGTATTGCTTTTCACGATATAGCTCCGCAAGCCCCAGTCCATTTCCTAGTGGTACCGAAAAAGTTCATCACCCACTTGTCCAAAGCAGATCCCGCTGATGAAAAGCTACTTGGACATCTGATGATCGTTGGCAGCAAGTGTGCAGCTGATTTGGGTTTGACAAATGGGTACCGGCTGGCGGTGAATGAGGGGCCAGATGGTGGCCAGTCTGTGTACCACCTTCACCTTCATGTTTTTGGTGGACGCCAGATGGGCTGGCCTCCAGGCTAG
ENSXETG00000004489	satpa	0.31105390621192675	succinate-acetateTransporter Protein gene a [Source:Xenbase;Acc:XB-GENE-5924815]	ATGACTGATAGTAAAGCTGAGTCCCTTCATGCCTGTATCGGCGCTCTTGCTATCAGTGCAGGCTCGTTTTTGTTGGCAGTAAATTATTACAGTTGGACAGCGGCAACCATAGTGATACCCAGCACAGCCCTCGGCATTCTGCTTCTTATTGTAGCTGCCATTCTGGCATATGTAGGTATCCGAAAATGCAGGACAAATGCCTCCCTGAATGTGTTATTTTACTGGACTGTGTCAGCTCTGTGGTTCAGTTCTGGAATCAACTTCATATTGGCAGGAAATAATGTGTTATCCGCCACTAACCAGACCATTATGTCTGGTTTTAATTCTGGAACCAACTTCCTGCTGGCAGGAAATAATGGGACAGTCAGCCCTGACATGACTAGTGCCAATGTTCCTGGG…
ENSXETG00000009700	rin2	0.0363052312102424	Ras and Rab interactor 2 [Source:Xenbase;Acc:XB-GENE-484799]	ATGGCCATGGAAGTGTCGCCTTTGGATGGCCGTGGAAATTACTTTAAGCTTATTGAAACCCTCGTCTCAGAGATCGGAGAACTGAAACAGGAGATGGTACAAACTGAATTCTGTGTCAGAGATGAAGAGTCCACAGATCGTTTAAGCAGAAAGGAAATGGAGAGTAATCACTCACCAGAAAAGAAAGAAGTGAAATCCTTCCTTCGGGACTCTGGGTATGAGAGCGTTTCCTTCAAACTCAGCATCTTAGATAAACTCCTTCATACTCACCCTGTGTGGCTTCAGCTTGGCCTCAGTGATGACAAGGTACCGGGCATCCTGCTAGAGCAGCCTCCAGCGACTTTTCTTGTTAGAAAATCCAACAAGCTTCAGAAGAAAGTGATCTCTGTCCGTATGCCA…
ENSXETG00000014955	rangrf	0.33153784574503753	RAN guanine nucleotide release factor [Source:Xenbase;Acc:XB-GENE-5760490]	ATGTCTCCCACCCTATCCCACATACTAGTGCTGCCCTTCTGGCAAATGGATGCCCAGGCCTCCGACGCCTTTCGCTACAGCGTTTGCCCGCACTTATCATGGCGGCCGCGCACTAGTTTCAATTCACATTTCCCTTTACCAAGATGTCTGCAGCAGTTCCTCATTGTACGTCAGCAGCCAGCGCGGCTTTACCCTGTTGCTACCCGGCCGCCGGTGTCACCTTGGGGGTCTCTCCGTTCAGTCGGTACCAAGATGGCAGAAGCAGGGAGGCAGCGGACCTCCCCCAAGGCTGTGAAGTTCCTGTTCGGGGGGCTGGCAGGGATGGGGGCCACTGTCTTTGTGCAGCCCCTCGACCTGGTGAAGAACCGGATGCAGCTGAGCGGGGAAGGAGCCAAAACC…
ENSXETG00000008062	gpx7	0.12685504368923647	glutathione peroxidase 7 [Source:Xenbase;Acc:XB-GENE-940915]	ATGAGAGAATTAGGTGCCATGTATCTAACAGCTCTTGTTCTGCTTCTCTTGTTGCCCCCCTCACTGCAGAAATCCCGGGATTTCTATACATTTAAGGTGGTAAATATCAGGGGCAAGCTGGTGTCGCTGGAGAAGTACCGTGGTTCGGTAACCCTGGTGGTTAATGTAGCAAGTGAGTGTGGATTTACAGATTCTCACTACAAAGCATTACAGCAGCTGCAGAGGGACCTGGGATCTTACCACTTCAATGTTTTGGCATTTCCATGCAACCAGTTTGGACAGCAAGAACCAAATAGTGACCGAGAAATTGAGAACTTTGTCAGAAAGAATTATAGTGCATCCTTTCCCATGTTCAGCAAAACTGCTGTCACTGGCACTGGTGTCAACAGTGCCTTCAAG…
ENSXETG00000037011	kiaa2026	-0.024624451166156552	zinc finger and BTB domain containing 12 [Source:NCBI gene;Acc:100038169]	ATGGCATCTGTCCCTGACATATTACGCTTCCAGCTTCCTGGCCATGAGGCAGCCACTCTCCGCAGCATGAACCAGCTTCGTTCAGAGGAACGATTCTGTGATGTCACTGTTCTCTCTGACGGTCTCAAATTCAGGGGCCATCGGGTGGTTTTAGCAGCTTGCTCGCCCTTCCTCAGAGACCAATTTCTGCTTAATCCAGGCTCAGAACTTCAGGTCTCCCTTATGCATGGCCCCAGGGTGGTCTCAGACCTTCTTCTTTCCTGTTATACAGGCCTCCTGGAATTCTCAGTGAGAGACATTGTAAACTATCTGACAGCAGCCAGTTACCTACAAATGGAGCATGTTGTAGAGAAATGTCGTCAAGCCTTGTCCCAGTTTATTGAGCCAAAGATCGGACTG…
ENSXETG00000009660	endoul2	0.41664444949141854	endonuclease, poly(U) specific like 2 [Source:Xenbase;Acc:XB-GENE-5929403]	ATGATGAAGGTCTATCTTGTTTTCTTGTGCCTTCTGCCCTCTCTGATTTCTGGAGCCAGCATCCTGCCTGAACCCAGAAAGAATGTTCGTGCTTCTGCTACAAATGCTGAAATTCAGAGTCTGGCTGAGCAGTTCTATGCAGCTGATACCAACAAGGCTGCAAGCGGGGACATTAACCTGAATCTGCAATATAAAGCCACCAGCTCCCAGAGTACCTCAGGAACGGACTATGCCAGTCAAAAGTTATTCAGTTATGTGAATGAAGCCAAACTGTTTGCTCGGCCAACCTTTGCCAAGCTTGTGGCTTTGCTTGATAATTATGTCCAGATAACTGGTACTGCAGAATCTGTGCCCACGGCTGAAGTACAAGAGCAAAATGCTTTTATCGATGAGATATTC…
ENSXETG00000039549	NA	0.3747376946657599	histone H2B 1.1 [Source:NCBI gene;Acc:100495578]	ATGCCCGAACCCGCCAAATCCGCCCCAGCGCCAAAGAAAGGCTCTAAGAAAGCGGTGAGTAAAACGCAGAAGAAAGATGGGAAGAAGCGCAGGAAGAGCAGGAAGGAGAGTTACGCCATCTACGTGTACAAAGTGCTGAAGCAGGTGCACCCTGATACCGGCATCTCTTCCAAGGCCATGAGCATCATGAACTCCTTTGTTAACGATGTGTTCGAGCGCATCGCAGGGGAAGCCTCCCGCCTGGCTCATTACAACAAGCGCTCCACCATCACCTCCCGGGAGATCCAGACCGCGGTCCGCCTGCTGCTGCCTGGGGAGCTGGCCAAGCACGCTGTGTCCGAGGGGACAAAGGCTGTGACTAAATACACCAGCGCCAAGTAA
ENSXETG00000038921	mlana	-0.0388081200860976	lamin tail domain containing 2 [Source:NCBI gene;Acc:100496703]	ATGGAAACTGGACATTTTTTAAGGTCTCCTTGTCCCCTAAAGATTGTTGAGGTGAATCCTTTCGGCCACTTTGTCAGGATATGGAACTCCTCCCCTTTCTGCCATGTTGATCTTAGTGGCTACATCCTCTGGCAGCTAGAAGGGAACTATCCAGTCTCTGTCTACCGCTTCCCACAAAACATATTTCTTCCTGCCTGTCAGCATGTTACGGTTTGGGCATCTGCTTCCAAGGTTTCCCATAACCCTCCTACAGACTTAAGATGGAAAGGAAGGCTGTACTTCAGAACCAACCCCCAATGTATCACAGTCCTTTCACGCCCAACTGGTCAGCCGGTAGCCTCATACAGACCCCTTCACTCTCTCCCAGGGGGGATCCCAGATGAGACTGGAAAGTGTGTT…
ENSXETG00000014260	niban2	0.06893594910836817	niban apoptosis regulator 2 [Source:Xenbase;Acc:XB-GENE-989691]	ATGACAGAGGCATGTCTGAAATGGGTTCTTTTTACTGATTGGTGCACCCCCTTCAGGACCTGCCACTCTCTCTGCTGGGCCATGGGGGATGTAATATCCAGTCACCTGGATGAGAGCCGGCGCAACTACATTACAGAGCGTACAGGAAAACTTCTCACAGAGTTTGGAAGGCTGTATGAAGAGCAGTATGGGGTTGCACTCTTCAATAGCGTCCGCTATGAAATTGAGGGCAATGGTGGACCTCAGACACAGCTACTCCATCGAAAAGCTCCTCTCAAAGACCGGGTGATATTTTCGGGGAACATTTATCAGTATTTAGAAGACACCAAGAAATGGAGAAGCCGATACTGTCTGGTTCCCCACCACTATGGACCAGTACTTTATGAAAACAAGACAACG…
ENSXETG00000033155	grasp	-0.4203910004958587	bolA family member 1 [Source:NCBI gene;Acc:100170577]	ATGCTACCGTTGAGCCTGCTCCGAACTAAATGCAGGATACCTTGGACACTGGCCACATTGCCGTATTCTAGATCACAGCTTTACATGGAGAGGCCAGTGGAGAACGCTATCCGATCCAAACTGACTGAGACCCTGAAGCCCAGCCACTTGGAGGTGCTGAATGAGAGCTATATGCATGCGGTGCCCAAGGGCTCGGAAACGCACTTTAAGGTGGTGGTGGTGTCGGAGAGCTTCCTCGGCAAGTCTCTGATCCAGAGGCATAGACTGGTGAATGAACTGCTGAAGGACGAGTTAGCTGGTCCTGTTCATGCCTTGTCCATCCAAGCCAAAACCCCTCAACAATGGGAGGAAAACCCTGCCATCAGCAATAGCCCAGCCTGCATGGGGGGCTCGAAGCAT…
ENSXETG00000036534	NA	0.02932288123566526	NA	ATGTTTTTGTACTCAGGTGGAGGAAAGCAGATTCACTATCATGCACTCCTTTCTGTAGCTCCATTGACAGGCATGTTGTTATCCTGTCTGGAGCTCTTTTGTTTTACCCATTTACCTCAGATTTTCCCAGACCCTTGTGAAGAGGAAGAAGTTCCAGTAAAGATGAGGGGAAGGTTACCATCCATAGTAGTGGAACCAACTGATTTGATTGCTGTAGAGAGTGGGGAGTTACGGTGGCCACCAGATTCTCTTAGAAAGTCAAAAGAAGAAGCTGGACAGGAGGAAGATTGTGAAGAAAATGAAGCAGGAGAACAAATTGGTATGATATTAAAATTTAGCACTCATACTAAATTTTTTTCCCCCTTGCTTTAA
ENSXETG00000033012	shisal2a	-0.3071550638359177	shisa like 2A [Source:NCBI gene;Acc:100496818]	ATGAGTGCAGAGTGTTCTAGTTATACTACAGCCGAGAAGGTGGTGGTAGGTGCTTTCAGCTGTCCCAAGGCAGACAGTGACATGGGTGCCATATACTGCTGTGGATTTAAGGACATAAAGTATTGCTGTGATGATCCTAATAGTTTTTTCCCGTACGAGCACAGCTACATGTGGTGGTTGAGTGTGGGAGCTCTTGTGGGCCTGTCCATAGCAGCTGTGGTACTACTGGCATTTATCATTACTGTGTGTGTTCTCTGCTATCTGTTTATCAGCAACAAACCACACAACAAGCTGGACACCGGTTTGAGCCTACAGACAGCAGGGACAGAACAAAATTCCTTAGAAGGCCCCAGCAGATCCAGCCAATCAGTTGCACCCAATGGTTTCAAACGTCATTTT…
ENSXETG00000034631	NA	0.4302478217951833	aconitate decarboxylase 1 like gene a [provisional] [Source:NCBI gene;Acc:100490060]	ATGTTCTCAGCCACCTTGCAGAATTCCAAGAAACTTCAGCAGATATGCAGACAGCTCCACTATTACGATGTTACAGTCGCTGTCAGTCCTCAGTATGAAGAATCTGTCACAAGCACTTTTGCCTCATTCATCACTGACATTCGCCCTGAGCACCTCTCAGACGTTGTACGGCACAGAAGTAAGCGCATGATCCTGGACAACATCGGAGTCGGCCTCGTGGGCACAACCACTCATGTGTTCGACATTATTCTGCAGTACTGCCAGGATTTGCACTCTTCTGGATATGGGAAAGCAGCTGTTAGCTCAGTGTATGGAAGAAAGGACCTAATGCTGTCACCAACCCTGGCTGCCTATGTCAATGGAGTTGCAGTTCACTCCATGGACTTTGATGACACCTGG…
ENSXETG00000009659	tspan31	0.12291732159508725	tetraspanin 31 [Source:Xenbase;Acc:XB-GENE-942512]	ATGGTGTGCGGAGGCTTCACGTGTTCCAAGAATGCGCTGTGTGCGCTGAATGTGGTGTACATGCTGGTGGGCCTGCTGTTGATTGGCGTGGCAGCATGGGGTAAAGGTTTTGGAATCGTCTCTAGTATACACATCATTGGTGGAGTGATTGCCATTGGAGTTTTCCTTCTACTCATTGCCATAATTGGTTTGATTGGGGCCGTTAGTCATCACCAAGTGATGCTCTTTATTTATATGGTTGTTTTGATTCTGGTCTTTATATTTCAGTTTATTGTCTCGTGTTCCTGTTTAGCAATGAACAGATCACAGCAGGAGTATTTCCTGAATACAACATGGACTCGGATGAGCAATGACACAAGGCTGAATTTAGAGAAAACGCTGGAATGCTGTGGGTTTTTA…
ENSXETG00000030580	jak2	0.058077006930274594	chondroitin sulfate synthase 3 [Source:HGNC Symbol;Acc:HGNC:24293]	ATGTTAATTATATGTGTTAATGGCGAATACTTTTTGTTTCAGATGCAGCAGTTATTCCACGAAAATTATGAACACAACAGAAAAGGATATATACAAGACCTTCACAACAGCAAGATTCATGCAGCGATAACACTGCACCCCAACAAAAGGCCAGCATATCAGTACAGGCTCCATAATTACATACTGAGCCGAAAGATTTCTGAATTACGGTATCACACTATCCAGCTTCATAGGGAAAGTGTTCTAATGAGCAAACTTAGCAACAGTGAAATAAGCAAGGAAGATCAGCAGCTTGGCATGATGCCATCATTCAACAGATTTCAACCACGAGAAAGAAATGAAGTAATTGAATGGGAGTTTCTAACAGGCAAGCATATTTATTCTGTGAATGCAAATGTT…
ENSXETG00000006926	camk4	0.1562812754288588	calcium/calmodulin-dependent protein kinase IV [Source:Xenbase;Acc:XB-GENE-5911781]	ATGCTGAAAGTCACTCTGCCCTCCTCGTCTTCGTCGTCTTCTTCCTCCTCCACAGCATCCTCCTCTACCTCCTCCTCCTCCTCTTCCTCCAGGTCTGGCAGCGCTGCTCCCGAATACTGGATCGATGGCTCCAATAAAGACACCTTGGCCCATTACTACGAGCTGGAGTCCGAGCTGGGACGGGGTGCTACGTCGGTTGTATACAGATGCAGACAGAAAGGAACCCAGAGACCTTATGCTGTCAAAATGTTAAAGAAAACTGTAGACAAGAAAATTGTCCGAACAGAAATCGGCGTACTGCTCCGTCTTTCACACCCAAACATAATCAAATTAAAGGAGATATTTGAAACCCCTACAGAGATTAGCCTTGTTCTTGAGCTGGTGACAGGAGGAGAGTTA…
ENSXETG00000011072	tmem63c	0.23351801204022835	transmembrane protein 63C [Source:Xenbase;Acc:XB-GENE-992232]	ATGGATATCCTATACAGAACTGAGAGTCCTTTGGGGGACTCCCTGTCCATGGACCCTCCAGTAAATGAGACTGAGCAATGTTATAAAGCGCATTCACACAGCACAGTTCTGCAGGGGCTTCCATTTGGTGGGATCCCTACTGTGCTAGCCATCAACTTCCTGGCTTGGCTGGTTCTACTGCTAATATTCTCCTGCCTAAGGAAGGCTGCTTGGGACTATGGACGTTTGGCATTGCTGATAGACAATGACAGCCATGCCTTGCAGCGCAGGTGGACATCATATGATCTCACTTCTCTGTTTTACGGGGAGCCTAGTGAAAAAGAGAAATCGCCCTGTGAGATCAGTCCTTCTGAAGCAAGCACCAAAGATGTGGGCCTGTGTTCCTGGCTCAGCTCCATT…
ENSXETG00000038976	NA	0.030699303465439115	NA	ATGGCATTTGTACCTCCTGAGTTACGCCTTCCCATTCTCCAGCAGACTCATAGCTCCAAACAAGCTGGCCACCCTGGTTCTGAAAAAACTCTTGAACTTCTTCAACGCCTAGTTTGGTGGCCGACCATCCGCAAGGATGTCCGAGACTTTGTCGCAGCTTGTACTGTATGTGCCACCACTAAAGCCAGCCACTCTCGACCCTGCGGTCTTCTGCATCCATTGCCAGTACCCTCTCGCCCATGGACGCATTTGGGTATGGACTTTATTGTGGAGTTGCCGCCCTCCTGTGGTAACACTGTCATTTGGGTAGTGATAGACCGCTTCAGCAAGATGGCACACTTCGTACCCCTGAGGAAACTCCCCTCGGCTGTAGAACTGGCTCAACTCTTCATACAGCAT…
ENSXETG00000006038	rassf7	-0.03696910027920311	Ras association (RalGDS/AF-6) domain family (N-terminal) member 7 [Source:Xenbase;Acc:XB-GENE-956640]	ATGGAGCTGAAGGTGTGGGTGGATGGAGTGCAACGTGTGGTCTGTGGCGTGTCGGAGCAAACCTCCTGCCAGGATGTTGTCATTGCTTTGGCTCAAGCCATAGGTCAAACTGGACGTTATGTTCTCATACAGACTCTTCGGGACAAGGAGAGGCAACTTTTGCCCCATGAAAGGCCCCTGGAGTTCCTATCTAAGAGTGGGCAATATGCCAATGATGTGCATTTTATTTTGAGGCGCACAGGACCAAGCTTAGCTGAACGTCCATCCTCTGATACAGTCCCAGTGCCCCCTGAAAGGACTTTCGTCAGATCGAGTTTGCCCCTAAATACCCGAACAGCTGGCGCAGAGATAATAAAGTCAAAGGAGCCAAAAAAGTCACTGACATTTAATTTGGGGCCT…
ENSXETG00000031305	cdc37l1	0.2699951747979489	membrane integral NOTCH2 associated receptor 2 [Source:HGNC Symbol;Acc:HGNC:33914]	ATGAAGAAACTAGAACAGCACAGAATGGATCTTTCTGTTTTGCCGAATAATAATCATCCAGACAAATTTCTTCGTCTTGATGTTCAGACTTTAATAGCTAACTCTGCATTTTTACATGCCAGACAATGGCGCAACAAACTGTATTTACAGGTAAGGGAATGCCTCACAAACATCTCTATAGAAGCTGGTGAGGAGATTCCTGTTGTGGTTGATAGGACATTACGTGAGCACTTTACACCAGAAATCATCACATCCACAATTAAAAATAACCCCTTGTACCAGGACATTGAGAGAGTGGACAAAAGTGAAGTCAAAAAGAAGAACCCTTCATGGACTGTTCAAGAGAATCTCAAGCTTTCACTATACCTTAAGGAAAATCCTAATGACTTACATTACTGG…
ENSXETG00000008063	coa7	0.3189922201195273	cytochrome c oxidase assembly factor 7 (putative) [Source:Xenbase;Acc:XB-GENE-6258829]	ATGGCTGGTCTAGTAGACTTAAAGAACGAGGAAGAGGTGAAAGAATACCTGGATAATCTGGGCACGGAGTACTCTTACCAATGTCTCAAAGAGAAGCAGCCAGACGGATGCAATCGGTTAGCTGAATATTTAGAAAACATTAAAAAGAACTTTGAGTCTGCAGCTCAGATATTGAAGATCAACTGTGACCAAAATGAACACAGCGAGAGCTGCTACAAGCTAGGTGCTTATTATGTTACTGGGAAAGGTGGGTTACCAGTAGATCTGAAGGCCGCATATGGTTGTTTCCTGAAATCATGTAACAAAGGTGGCAAAAAGTCCATTGATTCTTGTCATAATGTTGGATTGTTATCTCATGATGGACGAGTGAATGATGACAAACCTGATGCTCTAAAAGCC…
ENSXETG00000032522	pls1	0.3856870710938023	synaptic vesicle glycoprotein 2A [Source:NCBI gene;Acc:100379721]	ATGGAGGATACGTACAGAGACCGGACTGCCTTTATTCGAGGAGCTAAAGATATTGCGAAGGAAGTCAAGAGACATGCGGCCAAAAAAGTGGGCAAGGGCGTGGACAAGATGCAGGACGAGTACACAAAGCGATCTTATACAAGATTTGAGGAAGACGATGATGACGATTACCAGCCACAAGATGGATATTACCGGGGCGACCCTCTTAATGACGAGGAAGGAGCCTCTAGTGATGCCACCGAGGGGCACGATGAAGACGATGAAATTTATGAGGGGGAGTATCAAGGTATTCCTCGGGCTGACTCCATGAAGGGAGATCACCTCGCAAACAACCAGCAGCTTGTTACGGAATTCAAAGACTTCAATGATTTGGAAGGTCAAAGGAAAAAGGACAAGGAG…
ENSXETG00000036490	NA	0.5039119542779784	NA	ATGCTGAACATGGAAAGTGAAGTATGGGCGTGGCTAAATTGTGTCCAATTAGAAAGCGGTATCAGAATGTACCTGAGCCAATCAGCAGACAGAGTAGATTCTATAAAAAGAGAACAGAAAAGCGCGGCTGGTATATTTCTATTTTCTGAGAAGAACGATAGAAGATTTGCAATGGCTGAAGCAGCTGAGACGGCGCCTGCTCCTCCCCCGGCTGAACCCGCAGCCAAGAAGAAGAAACAGAGCAAGAAAGCAGCGGGGGCCACTAAATCCAAGAAGCCATCTGGGCCCAGTGTGTCCGAACTGATAGTCAAAGCCGTATCCGCTTCCAAGGAGCGCAGCGGGGTGTCCCTGGCAGCTCTGAAGAAGGCTCTGGCTGCAGGAGGTTACGATGTGGAGAAG…
ENSXETG00000009658	marchf9	-0.511461614693823	membrane associated ring-CH-type finger 9 [Source:Xenbase;Acc:XB-GENE-5813114]	ATGATGTTTAAGTACCGGCTCCGCATGTTCTTCAATGAACTGAAGGTTCTGGTTCTAACCCGATCCGGGAGAAGCGAGCCGGAGCCGGGCCAGGCCATGCGTGGGCTCGGGGTTGGGGGCTGCGGATGGCCGCCCTTTGCGGACTGCTCCTCCCGGGACGACGAGGAGGAATATTATGGGACCGACCCCAGAACCCGCAGCTTGGGGCTGGAGGAGAAGGACGGGCGGATTGGGGCTGCGCTGGACGCTGTGTCCCTGGGAAGCAGCATTGACAGTGGCATGAGAACCCCGCAGTGCAGGATCTGCTTCCAGGGGCCAGAGCAGGGTGAACTGTTGAGCCCATGTCGCTGTGACGGTTCAGTACGCTGCACACATCAGCCCTGCCTAATACGCTGGATA…
ENSXETG00000018934	ctnnal1	0.2745679586255526	catenin alpha-like 1 [Source:Xenbase;Acc:XB-GENE-5815188]	ATGGCCACTTCTCCCTGCAGCAGCAGTGGGGTCTCCTCTTCGTCTTCTTCTGGCTTCAGCATTGATACGGGATTGGAAATTAAGACCAAATCTGTGGAGCAGACTCTGATCCCTTTGGTGTCTCAGATAACAACACTTATTAACCATAAAGAGAAACCAAAGAAATCAGAGAAGACTTTGCAGGCAATCCAAAGGGTAGGCCATGCTGTTAACCAAGCTGTGGGACGGTTTGTGGCTGTGGGAGAAACGATTGCCAATGAAAACCGTGAGCTAAAAGAGGAAATGGGCTTTGCCTGCAGTGAGGCTAGACGAGCTGGAGAGACTATTGCACAGTTGACAGACATGAACATCAGTGAGCGTCCGGATCCAGATGGATGTACTACCATTTTCACTGATAAG…
ENSXETG00000037313	nes	0.5600434299472534	nestin [Source:NCBI gene;Acc:100486009]	ATGGAGGGTTACTTAGCATCAGTATCGCTGGGAGAGGAGTCCACTCAAATGTGGAGCCTTAACAAACGCCTGGAAGCCTATCTGTCTAGAGTCAAAGCCCTGGAAGAAGAGAATGAAGTGCTCAGAGCAGAAATTCACACTTTAAAGAGCAGTAAGTCTGAAAGATGCTGGAAGAGGAAGCATCACGAAGAGATGATGAAGCTGAGGGATGCTCTGGACGATGGCCACAATGCTATGGTCCAAGCAGAAATGGTAAGAGAGAGCATTTATGAAGAGATTGAATTTATAAAGCAAAGGTGCCTGGAAGAGAAGCAAGCCAGGGAAGATGCAAAGAAAGAACTGTCTGAGAGTAAGAGATTGTTGGAAGAAGAAACAAGAGCACAGACCTGGTTGAAAGAA…
ENSXETG00000032613	adamts19	0.00951111662786816	ADAM metallopeptidase with thrombospondin type 1 motif 19 [Source:NCBI gene;Acc:100494209]	ATGTGTTTTTTTTTTTTTTTTTTAGATAAAGGTTTAATGAACACAACACAGTGGTATGAAGAGTGGGAAGTTGTCTATCCAGCTCTTTGGGGATCCCAAAATCCCAAAGAGGAAGAAAGGAAAGCTTTGGTGTCATCAGGAACTCCTTCAACTGACAGAAACCATAGCAACATTCACAGTTCTTCATCATATAACCAGGCTGCTGTTAGTTCTCGGGAAGTACGCTCTGTGTCCTCTCCTTCAACTACCTCTACATATTATCACCTTAGTCAAGAAGAGGAACAGGAAAATGAAAGGTTTGAGCCCCAAGATATGTATCACTTGTCACAATTTTCATGGATTTCTAAAGAAAAAACAACCAACGCATCATCTCCCAATGCATCGATACCAGTATCAGTT…
ENSXETG00000031140	NA	0.15021442361493395	glutamine amidotransferase like class 1 domain containing 3A-like gene b1 [Source:NCBI gene;Acc:100491202]	ATGCAGGCACAGCAGCTGCCATTAAGGAGCTCGGCTGCAAACACGTCAACAAGCAAGTCAGTGAAGTTCATGTGGATGCAAAGAACAAGTTGGTCACTACCAGCGCCTTTATGTGTAACAGCCCAGTTTATGACATCTCTCCCTGAAGCTATGGCTAAGAAGGTGGCAGTAATCCTTGCTGGTTGTGGGGTTTATGACGGCAGTGAGATTCATGAATCGTCGGCTGTCTATGTTCATCTGAGCAGAGCCGGAGCTCAGACTGATTTTTTTGCCCCAAACACAGACCAGATGCACGTAGTGAGTCACACCAAAGGGCAGCCCACAAAAGAGACACGCAATGTGCTTGAGGAGAGTGCACGGATCGCAAGAGGAAATATTAAAGACCTTAAAGATCTTGAT…
ENSXETG00000037147	naa20	0.2519617370221675	N(alpha)-acetyltransferase 20, NatB catalytic subunit [Source:NCBI gene;Acc:394715]	ATGACATCGCTTAGACCGTTCACATGCGATGACTTGTTTCGATTTAACAACATCAACCTGGATCCATTAACTGAGACTTATGGCATTCCTTTTTACCTGCAGTATTTGGCACACTGGCCTGAATATTTTATTGTTGCAGAGGCACCAGGTGGAGAACTCATGGGTTACATAATGGGAAAAGCCGAGGGTTCAGTAGCACGAGAGGAATGGCATGGACACGTCACTGCACTGTCTGTCGCACCAGAATTCCGACGTCTCGGGTTAGCAGCTAAACTAATGGAGTTACTAGAAGAAATTTCTGAAAGAAAAGGAGGATTTTTTGTTGATCTGTTTGTGAGAGTCTCCAATCAAGTTGCAGTGAACATGTACAAGCAGCTGGGATACAGTGTGTACCGAACT…
ENSXETG00000026376	nsd2	0.14431528620219955	nuclear receptor binding SET domain protein 2 [Source:Xenbase;Acc:XB-GENE-988824]	ATGAAACAAGTACCTCATATCCTCGGAAGTCCAGCTGTGAAGCCATCCAATCCAGAAGTGAGTCGGGAGTGCTCTGTGTTGCTTGGGAGAGCCCAAATCTCAGCCTCTCTCCAAGAGGGTGTAATACAGAAACTCAATGGCCATGATTCCCTGCCTTTCATTCCAACGGAGAAGCTGAAGGACCTCACTTCCCGTGTGTTTAATGGAGAGTCTGGAGCCCAGGAAGCCAAAGTGCGCTTTGAGGCTCAAGAGGTTCAAGGTATTGAGACGCCACCCAGCACTACTCCTACTAAAAATGGATCTCCTGAAATAAAGCTGAAAATCACTAAGACCTACATGAATGGAAAGCCCTTGTTTGAATCTTCTATATGTGGTGATAGAGGCGAGGAAGAGCCTCAA…
ENSXETG00000018598	hira	0.057109034107426154	histone cell cycle regulator [Source:Xenbase;Acc:XB-GENE-976072]	ATGGTTACAGAGGAACGCGTGCTCTTAACTCCATGTTTCCGGCGGGACAGTTTTGACCTGTGCATCCCGCGGGCTTCCGGTCTTGGTGGTTGTGCCGGAGCGGGATGGAGCGACGCTGAGAGGCGGCTCCGAGGCGGGCAGAAGCCGCTCCTGAAACCAACCTGGGTTAATCATAATGGCAAGCCCATTTTTTCAGTGGACATTCATCCAGATGGCACCAAGTTTGCTACAGGAGGTCAAGGACAAGATTCTGGGAAAGTTGTTATCTGGAATATGCCACCTTTACTCAAAGAGGAAGATGAAAAGAATGAAAATATTCCCAAGATGCTCTGCCAGATGGACAACCACTTAGCCTGCGTGAACTGCGTCCGGTGGTCCAACAGTGGAGCTTATTTAGCA…
ENSXETG00000019908	bcan	0.12408003336582415	brevican [Source:NCBI gene;Acc:100486298]	ATGGAGAAGAACATGAGGTGGACCGCGTTGCTGCTCCTGATACTTGCTCAGGTGTCAATATCGCTAACTTCAGCACTGGAAGGAGACTCAGAGCACAGTAAGACTCTGAAAGTGACGATAGGAAGCCTTCCTGCCAGACCGGTGCTGACTGGGACCCTCACCATACCGTGTCACATCAGGTACCACTCTCCATCCGAGGTCCTCAGCGTTGGGCGCCAAGCAGTGCTGGCAACTCCTAGAATAAAATGGAGCTTCATCTCCAATGGGAAGGAGGAGGAGATACTGGTGGCACGGGGCCGGAAAGTTAAGATCAGTGAGGGCTACCGGGCCCGTGCCTTGATGCCACACTACGCCGAGTCGGGCAACGACGCCACTTTAATCATAAACAGCCTAATAACT…
ENSXETG00000037304	NA	0.22732096418478606	histone H2A type 1 [Source:NCBI gene;Acc:101733656]	ATGTCAGGAAGAGGCAAACAAGGCGGGAAGACCCGGGCAAAGGCCAAGACTCGCTCATCTCGGGCTGGGCTGCAGTTCCCAGTCGGCCGTGTTCACCGGCTGCTGAGGAAAGGCAATTATGCTGAGCGGGTGGGAGCCGGAGCTCCAGTCTATCTTGCCGCAGTGCTGGAGTATCTGACCGCTGAGATTCTGGAGTTGGCCGGGAACGCTGCCCGGGATAACAAGAAGACCCGTATCATCCCCAGGCACCTGCAGCTCGCTGTGCGCAACGATGAGGAGCTGAACAAACTGCTCGGAGGGGTGACTATCGCTCAGGGCGGTGTCCTGCCCAACATCCAGTCCGTGCTGCTCCCTAAGAAAACCGAGAGCACCAAAGCGGCCAAGAGCAAGTGA
ENSXETG00000021138	igf2r	0.4437955309040791	insulin like growth factor 2 receptor [Source:Xenbase;Acc:XB-GENE-480957]	ATGTGGTTTGGCACAAATTATACACTTTGTTTGCCTTTGATATATCTAATACTCTTTTTCTTCTTTCGTTCTGACAGGCACACTTGGGATGCCCTCGATACTGATAAGAATGTTCTCTACAGAATTAATGTCTGTGGTAGCATGCCTGCAGCAGAATGTGGAGGACACGAAGCTGCAATTTGTGCACAGGATTTAACCAAAAATACCTTAAGCCCAGTTGGAAATTCATATGTGCAGATTAGTAAAAACCTTATTTTGTTCAACACTACGCAACCATGCTCTGAGTATGAGCACAGAGTCCAAAGCAGCATCAACTTAATCTGCGGGAAAACATTGGGTACTCCTGAATTTGTTACCTCAACAGACTGTGTACATTATTTTGAGTGGAGAACATTTACT…
ENSXETG00000039163	phrf1	0.13011561078785858	PHD and ring finger domains 1 [Source:NCBI gene;Acc:100127807]	ATGGATGATGAAGAGAACCAAGATCAGCTGATGAACAGAAATGGCTCTCAAGGGAGTAATTGGCAGCAAGTGCTGCCTACCAGTGATAATGAAGAGATGGAAGACTCTGAGGATGCATCTGAGAGTGAAGATGGGGATGATGGGGAAGAAGAAGGTGATGAGGATGAAGATGTAACTGACTCTGAAGAGGAGGATGAAGAGGAGGAGGATGAGGATGCTACAACAGGAAGCCAAGATCCAACACAGCCTACAGGGGATTTAAATGAGGGGTTTAGTTCAGACGACGAAAGAGAAAGTTGCCCAATCTGCCTCAATGGCTTCAGAGACCAAGTTGTAGGCACTCCAGAAAACTGCAGTCATTATTTCTGCCTAGATTGTATTGTGGAGTGGTCAAAGAAT…
ENSXETG00000009657	cyp27b1	0.22889852833785337	cytochrome P450 family 27 subfamily B member 1 [Source:Xenbase;Acc:XB-GENE-942527]	ATGGCACAGACCCTCAAACTGGGCAGCAGCAGGTCCTCCCAGCTCTTCAGAGGGCTCCAAGAGCTCTGGGCTGAGACGGTCCTCAAGAACTCAGAGAAAGTCATCAAAGGGCACAAGTCATTGGCTGATATGCCCGGGCCCAGCACAGTCAGCTTCATTTCTGATCTGTTCTGCAGGAGGGGACTGGCACGGCTACATGAGCTGCAGCTGGAAGGGAAAGCCAAATTTGGCCCAGTCTGGAAGGCAAGCTTTGGACCCATTCTGACTGTTCACGTGGCAGAACCATCACTCATTGAGCAGGTCCTTAGACAAGAAGGAAAGCACCCTATTCGTTCAGATCTCTCCTCATGGAAAGATTACAGGCAATGCAGGGGACACTCATATGGACTCCTTACAGCG…
ENSXETG00000004478	tmem255a	-0.029392102852548257	transmembrane protein 255A [Source:Xenbase;Acc:XB-GENE-941241]	ATGCTGACTCAGCAGCCATCCCAGCGCACTGACATCCAGGCTGCAGACTCTACGGGTTCATTTAATAAAAGAAGGCGAAATTCCATTTTTGTAACTGTAACGCTCCTCATCGTATCTTCATTAATTTTTACCCTTGGCCTGGCCGCAACAACTAGAACAGAAAATGTGACAGTGGGAGGCTACTATCCAGGGGTTATTCTCGGGTTCGGGTCCATACTTGGGATTATTGGATCCAATCTGATAGAAAACAAGAGACAAATGCTTGTTGCCTCCATAGTTTTTATCAGTTTTGGGGTGATTGCCGCTTTTTGTTGTGCGATTGTGGATGGTGTTTTTGCTGCCAGGCATCTAGATCTCAGACCACTGTATGCTGGGAAATGCCGGTATTTTTCCACTACA…
ENSXETG00000034204	col22a1	0.4973166555165125	collagen, type XXII, alpha 1 [Source:NCBI gene;Acc:101730582]	ATGCCGCGTACAACTGTTTATCAAATATCTCCCTTAGCGCTTCTACTTTTCCTTTTAGCGTGCAGCGGAGGTAACACCCAAGTGCAGAGGGCAGGGTGTAAGAACGTTCACTATGACTTGGTCTTCATCTTGGACACCTCTTCAAGCGTAGGCAAAGAAGACTTCGAAAAGGTTCGGCAGTGGGTAGCAAATTTAGTGGACACGTTTGAGATCGAGCCAGATAAGACCCGCGTGGGCGTTGTACGGTACAGTGGGAAACCTTATACTGAGTTTGATTTGGGAAGATACCAGACTCTGGAAGATGTGAAAGAAGCTGCTCGAAATATTAAATATTATGGAGGAAACACCAACACTGGGGATGCACTTCGATATATAACAACGTACAGTTTCTCTGAAGAG…
ENSXETG00000020204	add3	0.25473168914350264	adducin 3 [Source:Xenbase;Acc:XB-GENE-5923007]	ATGACGTCTGCCCTCAGCCAAGGAGTGATCACGGCCCCTCCCCTTCCCAGCATGCCTCACAAAGAGCGCTACTTTGACCGCATTGATGAAAATGACCCCAGCTACCTCCGCGAGAGGAACATGTCCCCCGACCTGCGCCAGGACTTCAACATGATGGAACAGAAGAAGCGGGTCACTCAGATGCTAAAGAGCCCGGCTTTCCGTGACGACCTGGAGACCCTGATCCAGGAGCAGATGAATAAGGGCAACACCCCCACGGAGCTCCTGGCGCTGCAGCAAATCTCCGACTATATCATGGCCAGCTCCTTCTCTGGCTCCTCCCAACTCGGTAAGTCCGGTGTCGCCCCAATTAATGACATTCACCCCGCCATGGAAGCCACGATGGCCAAAGGAGAGAGG…
ENSXETG00000011818	ryk	0.08158007918334395	receptor like tyrosine kinase [Source:Xenbase;Acc:XB-GENE-485290]	ATGCTGCCCGGGGCCCCGGACCCCCTGGAGAGTAGAAGGAGGAGGAGGGGGAAGCTGCCGGGCCCCGGGCTGTGGTGCTGGTGGCCATTGCTTCTGTCCGTCCTCCTTCAGCAGCCGGAGAGGGCTCAGTCCGGACCTGGCCCATCTACTGACCCGGGACTGAACTTGTACTTGAGCGAGGAGGAGGTGCGGCGTCTAATCGGACTTGATGCAGAACTGTATTACATAAGGAACGACATAATTAATCACTATGCTCTGTCCTTCAACCTTCTGGTGCCAAGCGAGACCAACAGCCTCCACTTTACTTGGCATGCCAAGTCTAAGGTGGAGTATAAATTGGGATTTCAGGTGGACAACCCAATGGCCATGACCATGCCACTGACCAACATCTCCATGCAG…
ENSXETG00000034472	eif1ax	0.4584673564608017	eukaryotic translation initiation factor 1A X-linked [Source:NCBI gene;Acc:448063]	ATGCCAAAGAATAAAGGTAAGGGAGGCAAAAACAGAAGGCGTGGTAAGAATGAGAATGAGTCAGAAAAGCGAGAGCTGGTATTCAAAGAAGATGGACAAGAGTATGCCCAAGTAATCAAGATGTTGGGAAATGGCAGACTAGAAGCCATGTGTTTTGATGGAGTGAAAAGGTTATGTCACATAAGAGGAAAACTACGAAAAAAGGTTTGGATAAACACATCAGACATCATATTGGTTGGCTTACGAGACTATCAAGACAACAAAGCAGATGTTATTCTAAAATACAATGCAGATGAAGCCAGAAGTCTGAAAGCCTATGGAGAGCTTCCAGAACATGCTAAAATTAATGAAACAGACACATTTGGTCCTGGTGATGATGATGAAATTCAGTTTGATGAC…
ENSXETG00000037486	NA	0.3261495934947003	NA	ATGGCTGAAGCAGCTGAGACGGCGCCTGCTCCTCCCCCGGCTGAACCCGCAGCCAAGAAGAAGAAACAGAGCAAGAAAGCAGCGGGGGCCACTAAATCCAAGAAGCCATCTGGGCCCAGTGTGTCCGAACTGATAGTCAAAGCCGTATCCGCTTCCAAGGAGCGCAGCGGGGTGTCCCTGGCAGCTCTGAAGAAGGCTCTGGCTGCAGGAGGTTACAATGTGGAGAAGAATAACAGCCGCCTCAAGCTGGCTCTCAAGGGCTTGGTCAGTAAGGAGACCCTTGTCCAAGTGAAAGGGAGCGGAGCCTCCGGGTCCTTCAAGCTCAACAAGAAGCAGCTGCAGAGTAAGGAGAAGGACAGAATACAGAGAACAAAACAATAA
ENSXETG00000009655	mettl1	0.3698395401713981	methyltransferase like 1 [Source:Xenbase;Acc:XB-GENE-1000662]	ATGTCTAATAGCCAGGCAATGCCTTCCGATCCTGGTATAACCATGTGTAATACCCAGGCAACGCCTTCCGACCCTGGTATTACCGTGGCACATCCCAAGAAGCGCTATTACAGGCAGAGAGCTCACTCTAACCCAATGGCCGATCATACATTCCAGTACCCAGTGAAACCTGAAATAATGGACTGGTCAGAATACTACCCTGATTATTTCAAACCATTGGTACCAGACAGTGCCCATGATGATGCCAAGGATTTACAAGAGAGAAAGGAACAGCATCAGGTGGAGTTTGCAGACATCGGCTGTGGATATGGCGGTCTGTTAGTTGAGTTATCACCTCTATTCCCAAACACGCTTATGCTGGGACTGGAAATCCGAGTGAAGGTTTCGGATTATGTGCAG…
ENSXETG00000033772	ppp1r2	-0.005316091074170665	protein phosphatase 1 regulatory inhibitor subunit 2 [Source:NCBI gene;Acc:100038193]	ATGGCGGCGCAGACCCAGAGGCCCATTAAAGGCATTTTAAAGAATAAAGGTTCGGAGAAGCATGGGGTATGTGTCATTAGCAAGCCAGAGACGGCTTCGGATCGGGAAGAAGATCAGAGTAAAAAATCCCAAAAATGGGATGAAATGAATATTCTTGCTACTTATCACCCTTCTGACAAAGACTATGGGTTAATGAAAATAGATGAGCCCAGTACCCCATATCACAGGATGATCGGAGATGATGATGAAGGAGCAATGAGTGATTCCGAATCAAATGAAGACCTTACTGCAGATGTTCTGGCGGAAAAGTTAGCAGCAGCAGAAGGAACAGATCCTAAATTTTTGGCTCAGAGTGAAAGCAGCGATGAGGAGGAGGAGGAGCTGACAGAGGAGGAGAGA…
ENSXETG00000009698	crnkl1	0.41340138607055477	crooked neck pre-mRNA splicing factor 1 [Source:Xenbase;Acc:XB-GENE-5890911]	ATGGCGTCCACAGCGGCGGGGAAGCAGCGAATTCCAAAAGTGGCCAAGGTTAAAAACAAAGCGCCGGCAGAGGTGCAGATTACAGCCGAGCAGCTGCTGAGAGAGGCCAAAGAGAGGGAACTTGAGCTTCTGCCTCCACCTCCTAAACAGAAGATCACAGATGAGGAAGAGCTTAATGATTACAAACTAAGGAAAAGGAAGACCTTTGAAGATAACATTAGGAAGAACAGGACGGTTATTAGTAACTGGATAAAATATGCACAATGGGAGGAAAGTCTAAAGGAAATTCAGAGGGCACGGTCTATATACGAACGTGCTTTAGATGTGGATTACAGAAATATTACACTATGGCTGAAGTATGCAGAGATGGAGATGAAGAGCCGCCAGGTTAATCATGCA…
ENSXETG00000006030	irf7	0.18910299894673885	interferon regulatory factor 7 [Source:Xenbase;Acc:XB-GENE-5996133]	ATGGCAATGTGGGGATATTGCCTGTTGCCTGTGCTCTTTGGCCCATGGCTTCTCAGGCAGATTAACAGTAACATATTTGAAGGCGTTTTGTGGCTGAATTTGGAGAGGACGTTATTCCGCATCCCTTGGAAACACCTAAACATAAAGACTAAAGAAGAAAAGGATTATGGGATATTTAAGGCTTGGGCAATAGAGAGTGGAAAGTATAATAAAAAGTATGAGAATCCCACTTCTTGGAAAACGAACTTCCGCTGTGCTCTCAAAAGTGTTACCTGCAATGACATGAAAATGTTCACCGAAGTAGAAGATAATTCAAGCAGCCAAGAAGATCCCCATAAGATATACAGGGTAAACATTGTGCCTGCTGTACTACTCAACCCGGCCACTTCTTATACCGCA…
ENSXETG00000038287	hist1h4c	0.3901927630566555	histone H4 [Source:NCBI gene;Acc:100495739]	ATGTCTGGCAGAGGCAAGGGCGGTAAGGGGCTGGGGAAAGGAGGCGCCAAGCGCCACAGGAAGGTGCTGCGGGATAACATCCAGGGGATCACCAAGCCCGCCATCCGCCGCCTGGCACGCAGAGGGGGAGTCAAGCGCATCTCCGGCCTCATTTATGAGGAGACTCGGGGGGTGCTGAAAGTTTTCCTGGAGAACGTTATCCGGGACGCTGTCACCTACACCGAGCACGCCAAGAGGAAGACTGTTACCGCTATGGATGTGGTGTATGCTCTCAAGCGCCAGGGCCGCACTCTCTACGGATTCGGGGGTTAA
ENSXETG00000000118	slc2a12	-0.17887526811170534	solute carrier family 2 (facilitated glucose transporter), member 12 [Source:Xenbase;Acc:XB-GENE-1012136]	ATGCTTGCACACAGCAATGCACAGGACCTCATTCTGCAACAGACAAGCAGTGATGGTGATCCCCGCACAAACCCAAGGCAAACAGGATGTGGGGCTTTTATTCTTCTTTCATCAGTGATTGCTGCCGTAAGTGGACTGTTGGTAGGCTATGAGCTCGGAATCATCTCTGGTGCCCTTCTTCAGCTCCAGAGTTTATTAGAACTGACCTGTCAGCAGCAAGAAATAGTCGTGAGCGCATTACTGATTGGAGCTTTTGTAGCGTCACTTGTTGGGGGATCCCTTATAGACTTGTATGGCCGGAGAATCACAATCATTTTCACTTCCATATTACTTGTTTTTTCAAATCTTCTTCCAGTTGTTATTGTTTCCTATGGAAGCCTCATTGCTGGACGCATTGTC…
ENSXETG00000019910	hapln2	0.15301672398267682	hyaluronan and proteoglycan link protein 2 [Source:Xenbase;Acc:XB-GENE-6035673]	ATGGCATTCTCCATGGACTCGGCGCCGCCAAAATTTCTGCTGGATCCCATTCACCATGTGATTCTAACCCAAAGAGGAGCCAATGTCGTCCTTCCTTGCATTCTACGCATGCGACCACCGATCTACAGGGTGAAATGGAGCAAGGTCAACTCAGCTGACCCTCTGGAGAACCTCATATTGATCTCCAATGGAAAGCACCACAAGAACTATGACAGACTGAAAGGTCGGGCTCGTCTCAGGCGGAACCACCGTCTTGATGCCTCCTTGGTGATCGCCAATGTGACTCTAGAGGATGAAGGACGATACCGATGTGAGCTGGTGAATGGTCTAGAAGATCAAAGTTTAACTTTATCATTACAGTTGGAGGGAGTTGTGTTTCCATATCAGTCCAGTGGAGGG…
ENSXETG00000030218	wdr1	0.08441349235255333	RAN guanine nucleotide release factor [Source:NCBI gene;Acc:496602]	ATGAAGCTGATACTGGTTTCATTGGATCGTACAACCTCGCCTAACGTAAATTTAACTTTAAACCCTGTCTTCTTCCCTCTGCTTGCGGTACTAATCAACGTTTTCCCTCATCAAAGATGGCCGATCGCGGCCCTCCTTGTGGTACTAAGCAACGTTTTCCCTCATCAAAAATGGCCGATCGCGGTTTTTGCAGGCAAGTTTTTCCCTACGCAACCTGGCAGAATTTCTAGTGACGTAATTATTGTGCGTCCGGAGCCAGCGCTTCGAGCTGAAGTTGAGGGGAAGCACGCTGAGGATCGCAACGCTTCCAGTGCGGATTCCCCCATGGCCCAGGATTCCCAGCCGCACCCTCTCTTTGCCGGTGCTTTCTCTGCAGTGCTGCCCCCCTTCTCTCAGGAT…
ENSXETG00000000116	tbpl1	0.13838629423551727	TATA-box binding protein like 1 [Source:Xenbase;Acc:XB-GENE-488460]	ATGGATGCTGACAGTGATGTGGCACTGGATATTATAATCACTAATGTTGTTTGCGTGTTTCGAACAAGATGCCATTTAAATTTGCGAAAGATTGCCTTGGAAGGTTTAAATGTCATTTACAAGCGTGAAGTTGGTAAAGTTTTAATGAAACTAAGAAAGCCCAGGATAACTGCTACAATTTGGTCATCAGGAAAAATCATTTGCACAGGAGCTACCAGTGAGGAAGAAGCCAAGGTGGGTGCAAGGCGCTTGGCCCGTTCTCTGCAGAAACTTGGTTTCCAGGTTAAATTCACAGAGTTTAAAGTAGTGAATGTGTTGGCTGTGTGTACCATGCCGTTTGAAATAAGATTGGCAGAATTTACCAAGCAGAATCGCCCCCATGCAAGTTATGAGCCGGAA…
ENSXETG00000036149	NA	0.06381142203903231	provisional ortholog of protein kinase N1 [Source:NCBI gene;Acc:100493742]	ATGGAAGATGATAATTCCACCTCTTCCAGTCTTCCATCAGAACTCAACATCTCTGAATTTGGCTCAGATGTTGCCAATAAAATACAGGGCGCAGAAGGACCATCTACCAGCCCTGTTGAGCCCGGATCTCCCTCACTTGATCAATTCAACCTGGGTCAAGTGTTGGGAGAAGGAGGATTTGGGAAGGTATTCCTAGCCGAGCACAAGAACACCGAAGTGCTATATGCCATCAAGGCCCTAAAAAAAGAACAAGTTTTGAAAAGGGGCAACTTGGACAGTGTCTTCCATGAGAAGGAAATCCTCCAGAGGGTAAGTTCTGCTAACCACCCGTTCCTAGTGTCATTACATGGAACCTTCCAGACGGCGTCACACCTGTTCTACGTCATGGAATATCTACCT…
ENSXETG00000014953	zpy1	0.18015415096961238	zona pellucida protein Y1 [Source:Xenbase;Acc:XB-GENE-1019596]	ATGGCGGTTACCCTCCAACTTAGGTTTGCCTGGCTCTGTTTGTTGCTGCCCTGCATTGCGCTCTCTGCGAATTTCCCCAGCGGTGTATCTAAATCAGAGTGTCTCAATCGTGTCTTCTGGATATGGGTGGACAAGGACTTCGTAGGATCCAGAGAATGGTACTTAGAAGCTCTCAATGCAACTGGAACGCCAGTTCAACTTGATGATGACCTTGCCTCACAGTGTGGCTATTCCATAACTAAGGATATATACGGCAACCTGGAAATGAGGATCTCCTTCTTGGCATGTTGGGTTCTAAATGTGAATGACCTCCAGTTTGACCTTAAGGTGCAGCTTCTTGTAAGACAAAATGGTGTTGGTTTCATTCCTTACCCAGTCTCGCTGTCCTGCCGGATCACT…
ENSXETG00000003458	bdh1	0.37632603119779784	3-hydroxybutyrate dehydrogenase 1 [Source:Xenbase;Acc:XB-GENE-990740]	ATGTGTCAAGGTGAATCGACAGAAGTCATGCTGTGCGCAGGGACAGTTATGGCAAGCTGCCATCTCCCAGTGAGAGCATGTGCAAACCATTTCAGGTTTATGCCGAAATGGTCCTTTCCTCTCCAATCAGCAGTTGGAAAACGTCCCTTTGCAAGCCACACAGCTGAGGATAGTAAAGCTGTACTTGTCACAGGATGCGATTCTGGATTTGGATTTTCTTTGGCCAAGCATCTGCACAACAAAGGATTCATCGTTTATGCAGGATGTCTGTTTAAGGACAAAGGGGAAGCCGGGGTGAAGGAGCTGGACAGTATGAAGAGTGACAGAATGAGGACAATTCAGCTAAATGTTGTAAAGCAGGATGAAGTGGATAGGACTGTAGAAATCATAAGGGAAAAT…
ENSXETG00000008064	zyg11b	0.0656108889356107	zyg-11 family member B, cell cycle regulator [Source:Xenbase;Acc:XB-GENE-5829605]	ATGAGGCCTGATGAGCAGGCTCTACACAAAGAGGAATCTTCCCCAAAATCATTGCTAAATATTTCCCTGCTTTATTTGAGCACTCATCTTGAAAAGTTTTGCTGGGAGAGACAAGATGGAACCTACTGCTTACAAGATGCTGCAATATTTCCTCAAGAGGTGGCAGACCGATTGTTGCAGGCGATGGCTGTTCAAAGGCAGCTAAATGAAGTAACTGTAGGCATTTTCCGTGGGAATCAGTTGCGTCTGAAGCGTGCTTGTATTCGCAAAGCAAAGATCTCTGCTGTAGCTTTCCGAAAGGCTTTCTGTCATCATAAACTGGTAGAACTTGATGCTACTGGTGTCAATGCTGACATCACTATTACCGACATCATTAGTGGCCTCAGCAGTAGCAAATGG…
ENSXETG00000004477	atp1b4	-0.031168837299274138	ATPase, Na+/K+ transporting, beta 4 polypeptide [Source:Xenbase;Acc:XB-GENE-975977]	ATGGAGCCAAAAACGGCAACTCGTGGTGAAGATGTGAAATATCTTCATTCAGCCGACAATATAAGTGATGGAAGGCAACAGCATCCAGAGGAACCTGGGGAAACCAATCAAGAAGAACAGAAGAAGACTTGGGGGGAATGGATTCAGGACATGAAACATTTCATCTGGAATCCAGAGAAAAAAGAAGTACTGGGAAGAGACAAAAGAAGCTGGGCCCTAATTTTACTTTTTTATTCGGTCCTGTACTGTTTTCTTGCCGGGATGTTCGCTCTCTGTATGTATGGCTTGCTAGCCACAATTAGCCCTTACGTTCCCACTTATAGAGAGAGAGTTTTTCCCCCAGGTTTAACGATAAGGCCACAAGCCAATGCTCTTTATTTTGCATTCAATTCATCTGAA…
ENSXETG00000006022	polr2g	0.25929420728785113	polymerase (RNA) II (DNA directed) polypeptide G [Source:Xenbase;Acc:XB-GENE-1006751]	ATGTTCTACCATATCTCATTGGAACATGAAATTCTTCTGCACCCTAGATATTTTGGCCCTAACCTTCTCAACACTGTCAAACAGAAACTCTTCACTGAGGTAGAGGGAACATGTACTGGCAAGTATGGTTTTGTGATTGCAGTGACCACAATCGATAACATTGGTGCTGGGGTGATTCAGCCAGGGAGAGGGTTTGTGCTTTATCCCGTCAAGTACAAGGCCATTGTCTTCCGTCCTTTCAAGGGTGAGGTGGTAGATGCCGTGGTGACCCAGGTTAATAAGGTTGGATTATTCACTGAAATTGGTCCAATGTCCTGCTTCATATCAAGACATTCAATCCCATCTGAGATGGAATTTGACCCAAATTCCAATCCACCATGTTATAAGACCGTAGATGAG…
ENSXETG00000009654	eef1akmt3	0.16384185335179127	EEF1A lysine methyltransferase 3 [Source:Xenbase;Acc:XB-GENE-5830044]	ATGCATCCAGAGGCGAAGGAACCGGACTGCGGATTCAGCGAAGTGCTACCGCGGGAACTGGGCTCTCTCTTTTCCGACACCTACACGGAAGAGAGCCACTACGCCTTCTGCGGGACGGAGCTGCGCATCACCCAGCACTATGGGGCCAACCTTGGTGTTGCTGCTCCGGTGTGGGATGCTGCATTGTTTCTTTGTGGCTACTTCGAAGAACAGAAGTTGGATTTCAAAGGGAAAAAAGTAATTGAGTTGGGAGCAGGTACAGGCATTGTGGGAATTCTCGTGTCCTTGTTAGGTGGGCATGTGACTTTAACAGATCTCCCTCATGCTTTGTCTCAGATCCAAAAGAATGTCTCTGCCAATGTCTCCTCTAACAACCCTCCTCAGGTCTGTGCACTGTCA…
ENSXETG00000036206	lmx1b.2	0.10789946008804482	NA	ATGTATACCTTTAGACAGCAACAAGAGCCCCTCTCCCCCTGTCAAGGCCAGTCCTACACTCACTCAGCCCCCTGTCAAGGCCAGTCCTACACTCACTCAGCCCCCTGTCAAGGCCAGTCCTACACTCACTCAGCCCCCTGTCAAGGCCAGTCCTACACTCACTCAGCCCCCTGTCAAGGCCAGTCCTACACTCACTCAGCCCCCTGTCAAGGCCAGTCCTACACTCACTCAGCCCCCTGTCAAGGCCAGTCCTACACTCACTCAGCCCCCTGTCAATGCCAGTCCTACACTCACTCAGCCCCCTGTCAATGCCAGTCCTACACTCACTCAGCCCCCTGTCAATGCCAGTCCTACACTCACTCAGCCCCCTGTCAAGGCCAGTCCTACACTCACTCAGCC…
ENSXETG00000008281	isoc1	-0.24163984478424155	isochorismatase domain containing 1 [Source:Xenbase;Acc:XB-GENE-491284]	ATGGCAGAGAATCCAGTGTGCACCGCTCAGGTGAATATCGGGTCTGGAAGCCAGAGCAACAGCTGCATCAGTATTCTGGGAAGCAATAGCATCAACAGCAATAGTGTTCCAGTACTCTTCTGCTTCTCAGTATTTGCCCGGCCATCCTCTGTACCACACGGCTCAGGCTATGAGCTCCTGATACAGAAGTTCCTCAGTTTGTATGGAGATCAGATAGATATGCATCGCAAGTTCGTTGTGCAGCTTTTCGCTGAAGAATGGGGCCAGTACATTGACCTGCCCAAGGGTTTTATAATCAGTGAAAGATGCAAGATCAGACTGGTGCCCCTGCAGATCCAGCTCACCACCCTTGGGAACCTTACACCAGCAAGTACAGTGTTTTTCTGCTGTGACATGCAA…
ENSXETG00000024754	dolk	-0.029857879732590048	dolichol kinase [Source:Xenbase;Acc:XB-GENE-966505]	ATGGTGAATAAACTGATTGTAGCCGAGTCTCTGGTGGTGTTTGGCATAGTCCTAAGCATTCACGCCGTGGTCTGGGACCGCTTCTCGTGGTGCACGTTGGCCCTAGCCATCCAGGCTTTTTACGTGCAACACAAATGGGATCGCCTCCTGCAGTCAGGAGGGGCAGTGTTTCAGTACCGATCATCTGCCAACAGCGGCCTCCTTCCGGCCAGCATGGTTATCCCACTTCTGGGTATAGCAATGAGAGAAAGGTGTAAAATATCTGGAAGTGTGTACTTTGAACGCTTTGGAGTGGTCATATCTGCTACCGGCATGGCTCTGGCATACTTCCTGTCCATCATCGCCTTGGGTATCACTAAACCTATCCCTAGAAACACCTGCATCCTTTCTGGCATTGCC…
ENSXETG00000005433	dpep2	0.059768129730276426	dipeptidase 2 [Source:Xenbase;Acc:XB-GENE-6073530]	ATGCCTCTGTTTCTTTTCGGTACCCAAATGTCCATTAAGTGGATTTTGCTTTTTGTCCTAATCCCGTTTATTTCATCTTACAATGACAGTGAACTTGAACTTAGAACCATGAGACTGATGAAGCAGTCTCCTTTGATTGATGGGCACAATGACTTTGCACTACAGATTAGAAGACTGTACCAGAACAAACTATCAAGAATCAACCTAAGGATACTGAACAGTACAAGAACCAACATTAAGAAACTTAAAGATGGATATGTTGGAGCACAGTTCTGGTCAGCATACGTTTTGTGCAGTTCCCAAGATAAGGATGCAGTGAGGCTTGCACTTGAACAAATCGATGTAATAAAGCGGATGTGTAATGAATATGATGAGCTAGAGCTTGTGACTTCATCAGAA…
ENSXETG00000026306	fbxl12	0.5416193845111883	H1.3 linker histone, cluster member [Source:NCBI gene;Acc:549700]	ATGGCTGAAGCAGCTGAGACGGCGCCTGCTCCTCCCCCGGCTGAACCCGCAGCCAAGAAGAAGAAACAGAGCAAGAAAGCAGCGGGGGCCACTAAATCCAAGAAGCCATCTGGGCCCAGTGTGTCCGAACTGATAGTCAAAGCCGTATCCGCTTCCAAGGAGCGCAGCGGGGTGTCCCTGGCAGCTCTGAAGAAGGCTCTGGCTGCAGGAGGTTACGATGTGGAGAAGAATAACAGCCGCCTCAAGCTGGCTCTCAAGGGCTTGGTCAGTAAGGAGACCCTTGTCCAAGTGAAAGGGAGCGGAGCCTCCGGGTCCTTCAAGCTCAACAAGAAGCAGCTGCAGAGTAAGGAGAAGGCGGCACCGGCAGCAGCCAAAGCCAAGAAACCGGCAACAAAGAAG…
ENSXETG00000040579	NA	-0.18321709386631063	uncharacterized LOC101730707 [Source:NCBI gene;Acc:101730707]	ATGGCTCAGGATAACAGGTGCCGCCCAGGTATTAAGGCCAGTAGCAGCACCCAGTTCTGTGGCAGTTACGTCAAGGAGAAGATTTTGGAATTCTCTGAGCTATTTGGAAATTTGGAAGCCGACTGTGTGGTGCTGAGGAGGAGGCTGCAGAAAAAGAGAGCCGAGTGCAAGAAAGCCTTTAGCCTGAAGAGAGAGCAGATAAGGAGGGACATTGCCGAGCTGCAGGAGTTGCTGGAGGAGAAGGCCACCCGTTTGTGCCAGCTGAGGACACAAGTGAGGGGCTTGGAAGAGAAATACGGGGAGGGGAAAGTGGATGATTTTCAGGAATTTCAGAAGGACATTGAACAATGTAAGAGGTTTTGTGACAGCAAATCGGAAGAGGAGAGTGATGGTCCTACA…
ENSXETG00000000114	tcf21	-0.06652388725577221	transcription factor 21 [Source:Xenbase;Acc:XB-GENE-484805]	ATGTCCACCGGTTCTCTCAGTGATGTGGAGGACTTCCAAGAGGTGGAAATGTTGGAATGTGATGGCATCAAACTGGATCCTAATAAAGAATTTGGCATATCCAACGACAGCAATGAGGAAAGCTCAACCTGTGACAATGGTTCACCCAAAAAAGGCAGAGGAACATCAGGCAAGAGGAGAAAAGCACCCAGCAAAAAAAGTCCACTGGGCAACATTAACCAGGAGGGCAAGCAGGTCCAGAGGAATGCAGCCAATGCCAGGGAGAGAGCCAGGATGAGGGTGCTCAGCAAAGCCTTTTCTAGGCTAAAGACCACTTTGCCTTGGGTGCCTCCAGACACCAAACTTTCCAAGCTGGACACTTTGCGACTTGCATCTAGTTACATAGCTCACCTGCGTCAA…
ENSXETG00000019898	rhbg	0.4851649663569628	Rh family B glycoprotein (gene/pseudogene) [Source:Xenbase;Acc:XB-GENE-1009286]	ATGACGGGCTACTCCACCAACATGCGGATTAAGCTGCCCGTATTCTGCCTCCTCCTCGAATTCATCACTATCATCCTCTTCGCTGTGTTTGTGCGCTACGACCACGAGAGCGATGCCAAGCAGTGGCACGATGAGATGCGCAACCACAGCGTCCAAAACGCGGAGAACGACTTCTACTTTCGCTACCCAAGTTTCCAAGATGTCCACGTGATGATCTTCATCGGCTTCGGTTTTTTGATGACGTTCCTCAAGCGCTACGGTTTCAGCAGCGTGGCCTTCAACTTCCTCATCGCGGCGTTCGGCCTGCAGTGGTCAACCCTCATCCAAGGCTTTTTCCATGGCTTTCATGATGGCAAAATTCACGTTGGTATAGAGAGCATGATAAATGCCGATTTCTGC…
ENSXETG00000040216	c6h9orf152	-0.4333898696440114	chromosome 6 C9orf152 homolog [Source:NCBI gene;Acc:100486516]	ATGTACCTGACAAGTATCTTCTCCAATAAGGAGCCAGCTGACGGCACCAGGAAGCCGAGCAAAATGGATATCAGCCGGCTGGAGGAGCAGTACCACTGCATTAAGCAGAAGCAGAAGCAGCAGACCCATATCATTGTGTTCAAAGCAGGTAAAAGTGAACTGATTTCGGGAGAACCCATACTAAACACAGTTCCAGTCAATGAAGTGATCAGAAAACAAAAGTCCTTTGAAGAGCAGATGCCAGTGAAAGACGTAATGCTGGAAGTGCTGGACAAGAGTTACCTGAAAGAGAGCGACGGCTCGTGGCACACACACCTAAACATTCACCGCATGGTGCAGCTGGACTGCCAGTTTGGGATACAAAATGGCAGTGGGGACAAGGTGAAAGAGATGAACTTT…
ENSXETG00000019221	unc5c	0.11693860451438595	unc-5 netrin receptor C [Source:Xenbase;Acc:XB-GENE-921628]	ATGAGACACTATTCGGCTGTTATAGCTTTCTGTATGCATTGCAGAGGAAAAGGAATATTACCAACCATATCCTTCATTTCTATTTCAGTGCTGCTTTTGGCCCTTGCCAATGATGACTTTTTTCATGAACTCCCAGAAACCTTTCCATCCGACCCACCAGAGCCATTGCCCCATTTCCTCATTGAACCAGAAGAAGCTTACATTGTGAAGAACAAACCAGTCAATTTGTACTGTAAGGCCAGCCCTGCCACACAAATCTACTTCAAGTGCAACAGTGAATGGGTCCACCAAAAAGACCATGTGGTGAATGAAAAAGTAGATGAAACATCAGGTCTGATTGTTCGAGAAGTGAGTATAGAAATATCCCGGCAGCAAGTGGAGGAGCTCTTTGGTCTGGAA…
ENSXETG00000009653	tsfm	-0.006534673464397761	Ts translation elongation factor, mitochondrial [Source:Xenbase;Acc:XB-GENE-964861]	ATGCAACTTTATTTGTTACAAGCACAGGAACAAAGGGGCACATTTGCGTCATCATATTGCGTCTTGTCATATTTAGGGAACATGGCCGCGCTGTGCAGCAGCCTGCGTGCCAAGTTGTTGTGGCGGCAGCAGGTTGGACTGTTACACACAGGCGTGAGGCTACTGGCAGCAGACAAGGAGCTCCTGGTGAAACTCAGGAAGAGGACGGGCTACTCGTTTATCAACTGCAAGAAGGCTCTGGAACAATTTAGCAATGATTTTAAACAAGCAGAGACGTGGCTGCACCAACAAGCTCAGAAAGAAGGCTGGGACAAGGCTTCCAAACTTCAAGGAAGAAAAACTACAGAAGGTCTTGTGGGGCTGCTGCAAGATGGCAACACATCTGTGATGGTGGAAGTT…
ENSXETG00000004476	lamp2	-0.10578450703851988	lysosomal-associated membrane protein 2 [Source:Xenbase;Acc:XB-GENE-962456]	ATGGAGCGCTGTGCGTGTCCTGCAGCCTTGTTGCTACTAAGCCTAGTTCTTATGGGAGCCATGGCTTTTGACGTGGAAATAAAAGATGACAAAAATGCAACGTGTATCTATGCAAAGCTCTCGGTGAATGTAACAGTACAGTATGAAACCAATACCAGCAGCACGAAAAATGTAACCTTTTCAGTTCCAAGCGAAGTAACAACGAATGGAAGCAGTTGCGGCTCAAATGGCAAAGCACCTATACTGGTCATTAACTTTGGGAATGGTCACTCATGGAGCTTAAACTTCACTAGAAACGACAGCATGTACAGTGGGGGCGCACTCATCTTTACTTACAACACAAATGACAGCACTTTATTTCCGGATGCTTTGAAGGAAGGGTTGATTAGCTCTACTGCA…
ENSXETG00000040390	NA	-0.20937323434450023	uncharacterized LOC101730874 [Source:NCBI gene;Acc:101730874]	ATGAGTAAATTCACCATGAGCATCTCACAGGAAGAAGAGAAGCAGCGACTGGATCAGTTCCTCAGTGATTTGGCGCTTCTGGGTTCTTTACAGGGTTTCAGATACTTTCAGCCCTGGCTCAGAGGGAGAGAGGAGATCCTCCTGACTGTGGTGAACGAAGATCTTAGCTGCCCATCACTTCCATCTTCTACTTCTCTGAGCAGCAACTCCAGCTGCCAAGTTATGGTGGGCGATGAGCAAGTTCCATACAGGGTCCCGCCTCACCTTCCCCCCGCCTCCCCATGTGACAGGGAAATCGCGATCCCGGAAACCCACTGCACTCTTTTCCTATTGGCCGCTTACGCCAAGTATGGCCGACCATTTGTCTGGGTAAGGTCCAATCACCAGCGTCTGACTGGC…
ENSXETG00000019349	ltbp1	0.17041500198274387	latent transforming growth factor beta binding protein 1 [Source:Xenbase;Acc:XB-GENE-488058]	ATGGCTTGCAACAGGTGGGGAGTCGTGCTCTGTGCGGCTGTGCTTCTCTCCTCAGCTTTGGCTAATATAGAAAGCAGAGTAAGGAGGATCACTTATGTGCTCCAGCCGGGACCCCCGGGGATCTACCAGCAGCAGCACCCTGTGCCACTCAGCCACAATGTGGTGCTAAGCAGCGGGCAACAAGGCGCTGGCAGTCACATGAGCACCCAGGAAAGGAGCCGCAGGATGAGCCGGGTGATCGCCAGCCCGTCCTTGGTGCAGAGGCAACAGATCCCTGGGCAAAACGCGGCTTCCATGGTGAGCCAGTACTATTCCTTCTCCCGGGGCAGCGCGCAACAGGACGCACACAGAAGCCCCAGCCTGACGCAGACGCAGCACAAGTTCCAGCACCAAGGGGTT…
ENSXETG00000014504	pou3f4	-0.6478614385343229	POU class 3 homeobox 4 [Source:Xenbase;Acc:XB-GENE-479667]	ATGGCCACGGCTGCCTCTAATCCCTACAGCATTCTCAGCTCCAGCTCCCTGGTCCATGACTCTGCGATCATGCAGCAAGGCAGCCCTTTCAGGAATCCGCAAAAACTACTCCAAAGTGACTACCTGCAGGGAGTTCCCAGCAACGGGCATCCTCTCGGGCACCACTGGGTGACCAGCTTGAGTGATGCCAATCCCTGGTCTACCAGCCTAGGCAGCAGCCCATTGGACCAACAGGATATTAAACCCGGGAGAGAGGACCTTCAACTGGGGGCCATCATCCACCACAGGTCACCCCATGTCACCCATCACTCGCCTCATACCAATCACCCAAACGCCTGGGGGGCCAGCCCGGCTCATAACTCCTCGCTAACCTCCAATGGGCAACCTATCAATGTCTAC…
ENSXETG00000040690	tfrc	0.38282565444098715	NA	ATGTCCTTGGATAAAGTGTGGAACGATGAGCATTATGTTAAGCTACAGGAGCTTGGAAACTCACCAAATAAAGTAACAATTTTGAGCAACAGTAACCGAGAAGAGACTTTGCAGCCTTCTGCGTATGTGGCCTACAGCCCAGCAGCAAGTGTAAATGGAAAACTAGTGTATTGCCATTACGGCCGAAAGGAAGACTTCCAAGCCATACAAGAAAAGAATATTGATCTTTCGGAAAACCTGGTCCTTGTACGTTCTGGATTAATCAGCTTTGCTGAAAAGGTTAAAAATGCAGAACTCCGTGGGGCAAGAGGAGTATTAATCTATCCTGAGGCATCTGACTTTACATTCCCAGGCAGCCAAACTGGATCTATAGATTCTCCTTTTGGACATGCTCATTAT…
ENSXETG00000014951	tram2	0.029595419333565548	TNF superfamily member 13 [Source:NCBI gene;Acc:101730941]	ATGTCCCACATGGTGATCTGCGGATCTGTTAGCCTGGCACGGGGACTCTGGGGGGGTACAGGAGCCTGGCTGGGGGTCCTCATTTGCCTCATTGCTCTCATGTGCCAGTCAATCCACATCGGCAACCTGCAGGTGGAGCTCTCCCTAATGAGAAAGAGTCAAGAGGAACCGAGGCCAGAGGTGAAGAAGCACCACAATACAAAAGAAGAAGGCCTGGCAATCTGTCTCAGACAGAAAAGAGACCTCACGGGAGCCAGAAGGCCAAGACATCACGGAAACCGTTCATATGTTCACCTGGTGCCTGATCATTTCTTTACCAATGACGCCCTGGATGCCACTCTCGTCTCCTGGAAAGTGTCTATGAAGGAAGGGCGAGCATTTCAGGTTCAAGGTGTTAAT…
ENSXETG00000026716	itgb1	0.10604404443929036	integrin subunit beta 1 [Source:Xenbase;Acc:XB-GENE-946725]	ATGTATGCCCACCCCTTTAGTGTTCAACTTCTATTCACCTTTCCAAAAAAAAAAAAAAAAACAGATGTAACTAATGTCCACAACCTTGTGAGCCACAGGCCTTGTGGGACAGAATGTCTAAAAGCAAATGCCAAATCATGTGGAGAATGTATTCAAGCCGGGCCCAACTGCGGCTGGTGCACTAAAAACTTCTTACAAGAAGGAGAGCCCACGTCAGCACGTTGTGACGATTTGGCTGCTTTGAAAAACAAAGGCTGCCCTGAAGAAGACATCCAAAACCCCAGGGGACGTAAACAAAAGCTAAAAGATATCCCAATAACAAACAAAGGGAAAGGAGAACGTATGGACCCTGCAAACATCACCCAAATCCGACCTCAACAACTGGTATTCGAACTGCGA…
ENSXETG00000026497	ttll3	0.2473423110450564	tubulin tyrosine ligase like 3 [Source:Xenbase;Acc:XB-GENE-6035679]	ATGGAGAGAACTATACCCGGGAAGACTGTTAGAACACAACAAAAAAAAGAATGTAATTCAGACACCAAAACCAAAAAACAGCCTACAGCTAAGGACAAACATGATGTTTCTCCTACAAAAGGACATGTATCAAAAAAAACCCATACAAAGAAAATCAATCCGGATTCCCTTAAACAGGCTAAATTATTGGTAGAAAAAGCAATTCAGGAAAATAAAATATTTACTATCCAAGGCTATTATCCTTACATACGGAGTGGCCTGAGAAGCAGAGGATGGGTGGAGAAAAACTTTCATAAGAGCCAACATGATTATTTTGATGATCCAGAAGGTATCTGTGATCTTACATCAAGGCTTTTACGTAATCAAGATCCCAATTTTGTCTGGGTACCAACATATAAC…
ENSXETG00000026233	XB5726496 [provisional:tmem182]	0.5161302780664292	provisional ortholog of transmembrane protein 182 [Source:Xenbase;Acc:XB-GENE-5726497]	ATGAAAGTTGGAATCGCTGCTTTGGCTGCAGGTATTATTGGTGGGATTGGAGTCCTCTTATTCCTCATTGCATTTGGAACAGACTACTGGCTGTTGGCAACAGAAAACTGTACTGTTTCCAGTGAACTCTCTCCTGCTGCCGAGAATACAACTGATTCTCCAAAAACCACCTTGTTTTTTCACCACGAGGGTTTCTTTTGGAGGTGCTGGTTTAATGGGGATACATTCCAAGAGACGATTTGGAACTTCTGGTTTACTAGCCAAGCACATCCCAAGCACTGCATCCATGGGTATCTGTTTCCCATGCCCATTGCTCTAGGACCTGTCCCTCATCCATCTTATGATCCCACTGCAGTGTACAGAGGATTCTGGACTGCGTTCATCATACTAGCTGTTGCT…
ENSXETG00000036871	SIAH3	0.051781602048198566	siah E3 ubiquitin protein ligase family member 3 [Source:NCBI gene;Acc:100497552]	ATGCTTTTCTTCACTCAGTGCTTTGGGGCTGTGTTAGATCTTCTGCACCTTAGATTCCAACACTACCAGGCTAAGAGGGTATTTTCTTCAGCAGGGCAACTGGTCTGTGTGGTTAACCCAACGCAAAACTTACAGAATGGTTCTAATAGAAGTGCAGTCCCTGAGGAGGATTCCTCTGAAAGAAAGGAGCAATATCTTTGCCGTCAGTCAGTCAATGACCCACAGCTAACTTCTTGCACTTGCCCTTTGTACTCTTGCAAATGGGAAGGCCACTTGGAGGTTATTGTTTCTCATCTGACGCAATCTCACACGATTAACATTCTTCATGGAACAGAAATTGTATTTCTAGCAACAGACATGCACCTTCCAGCACCGGTGGATTGGATAATTACGCATTCC…
ENSXETG00000020986	nub1	0.2118004374306833	negative regulator of ubiquitin-like proteins 1 [Source:NCBI gene;Acc:549830]	ATGGCAGATCACTGCAAAGCTCCTGAAGGGATGGCAGAACGAAAGTTTTTGGTGGCCCAGCTGACAACATTTTTAAGAGAAGATCGGATACAGCTATGGAAAGCTCCGTATACCACAGAAACGCAAGAGACAGGTCCTGAACTCAAAGAGCTTTCGCAAAGATACTCTGACCGGCTGAAATACAATGTGGAGGACATCACCGGCGCTCTGGAGGAAATTCGCTGTTGCGCAATCCAGCGTGGAACTGGAAACCAAACGTTTAAGACAAAGGGAGTGGCCACTCTGCAAGTTTTCCTGCCAAGGAAACAGAATAAGGGCTCCAGAAACTTCATTGAGACTTCCCTAAATGTTACTGGAAAGGAGCTGAGGAGTCAGATAGCACAAACATATGGATTTCAA…
ENSXETG00000030976	usp6nl	0.14974284288943437	USP6 N-terminal like [Source:NCBI gene;Acc:100135167]	ATGAATACAGAAACAGACCAGGATGCATCTGTTAAAGCTGCTCAGGAACGAGCTGAAATAGTTGCAAAATATGACCGAGGCCGAGAAGGAGCAAAGATTGATCCTTGGGAAGATGCTGACTTTTTACTTTATAAAGTTACTGATCGATTTGGATTTTTACACAAAGAAGAACTGCCAATTCATGATGAGGTAGCACAAAAGCAAAAACTGCTTGAAATTGAAAGAACTACAAAATGGGTGAAAATGATAAAAAGCTGGGATAAGTACAAGAACAGTGAAAAGCTTCACAGGAGGATTTATAAGGGCATTCCACTTCAGCTTAGAGGGGAAGTGTGGTCTCTAATCTTGGAAGTTTCAAAGCTGAAAGAAGAGAGAAAAGATCTTTACCTGGTCCTAAAA…
ENSXETG00000005436	dus2	0.2690452459847358	dihydrouridine synthase 2 [Source:Xenbase;Acc:XB-GENE-1017020]	ATGATGGGTCTCTCTTTCCGAGATAAGAACATCTTGGGTCCCATGGTTCGAGTGGGTACACTCCCAATGCGTCTCCTTGCACTAGATTATGGTGCAGACATTGTATACTCTGAGGAGCTGGTTGATATAAAGATGCTGCAGTGCAAGCGTGTTGTTAATGATGTACTTCATACAGTGGATTATGTGTCTCCAACAGAGAGAGTCATTTTTCAGACATGTGAGAGGGAGCGTCACAGTGTTGTGTTTCAGATGGGTACGGCTGATGCAGAAAGAGCTCTTACTGTTGCCAAACTAATACAAAATGATGTTGCTGCGATTGATATTAATATGGGCTGCCCTAAGGAATATTCAACCAAGGGAGGCATGGGAGCAGCATTATTACTGTGTCCTGAGAAGATT…
ENSXETG00000014637	zc3h13	0.074356639676567	zinc finger CCCH-type containing 13 [Source:Xenbase;Acc:XB-GENE-5798641]	ATGTCAAAAATCCGACGGAAGGTCACAGTAGAGAATACCAAGACTATATCGGATAGCACATCGCGCAGACCAAGTGTTTTTGAGAGACTTGGACCTAGCGCAGGGAATAGTGCTGAGACTCAATGTCGTAATTGGATGAAGACTGGGAACTGTATATATGGTAATACCTGTAGATTCATTCATGGCCCTTCACCAAGAGGCAAAGGTTATAGTAGCACATATAGAAGGTCACCAGAAAGGCCACCAGGAGATTTGCGGGAAAGAATGAAAAATAAGCGTCAGGAAGTAGATTCTGAGTCTCAAAAACGAACTACTGAGGAATCCACATCCCCATCAAGGAAGGAGTCTTCCCGTGGTAGGCATCGTGATAAGGAAGATATTAAAATTACTAAAGAGAGA…
ENSXETG00000021849	dcaf4	-0.09205273731468522	DDB1 and CUL4 associated factor 4 [Source:Xenbase;Acc:XB-GENE-989101]	ATGGGCCCCAAAAGGGAGAACAAGCGTAACTGGAACAGAAAATACCAAGGACAACGCTTTCCTCAAAGGTCTCCATCTGAGGCATCTCAAAGCTCCACCTCCATTCAGTCAAACAAAATGGATAGAACTTCATCTTCCAGCTCTTCTCAAGCCTCAGCTGCTCCAGAGCTTCCAGGGTTTTACTTTGACCCAGAAAAAAATCGCTACTTTCGCATGCTCCCAGGACACAACAATTGCAACCCTCTGACACGGGAAGGCATACAACAAAAGGAAATGGAGTGCAAGAGACTTCAGCTCCTTGAAGAAGAGAAGAATAGGAAAAAATCTGGACCTGGATTAAATTCTGCTTTGTTGCTGAGAAAGAGACAGCTTGGATTGGTGCCTTTCACAACATATTGT…
ENSXETG00000012903	nup188	0.34608606799743113	nucleoporin 188kDa [Source:Xenbase;Acc:XB-GENE-5933085]	ATGGCGGCGGCCGGGTGTCTGTACCGGAGGACCAGCCGAGAGTTATGGACCATTCTGCTTGGACGCTCTTCCATGAAAGATGGGCATCAGATCAAAGCAGAGCTGGACAGATATGGAGACCGGCTCCTGCAGGGACTGGCATACTACAGGCCCCCCAGCACAAGCTCCACAGGCAAAGTGAAAGCCAATAAGAATCTGTCCCCTGCCCTACAGGAGCTTGGTTTGCGACTCAGCAAATTTCTGGGCCTGGATGAAGAGCAGAGCGTGGAGCTGTTACAGACTTACCTGCTGTATGATTACAGAGGGACACAGGAATCTGTAAAGGGTGTGCCACAAGATGAGAGGCAGAGTCAAGCACTGATGCTGAAGATGGTAGATTACTACTATGAAGAGAGAATT…
ENSXETG00000038735	NA	-0.3603479640629829	NA	ATGGTCGCACATGGAAGCTTTGCGTTGCCTTTGCTTGTGATGGCAATCAGCCTTAATCTCTGTAATCGCTATATCTCACCAATATCCATGCGTGGCTGCCACCTGGGCACTTGTCAAATACAGAACTTGGCCAGCATGCTATACCGCCTTGGAAACAATGGCTATAAAGATGGCTCCAACAGAGATACCAAGGATCCTTTAGGATATGGAAGGAGACGCCGCTCATTGCAACAGAATAAAAAGCGAACTGACTTACCAGGGATGTTACTGGCCACATAA
ENSXETG00000039947	NA	0.31066633762832707	NA	ATGATTTTGGAAGCCTCCCATAGGACTCAATGGCACTCTGGTCACTGTATGCAGTTGGCCTGCAATAAATATGGCAGTCATGTGTTAGATTGCATGTGGACGGCATCGACCTTAGGGTTCAAAGAGGAGATAGCGCAGAAGCTGGGTATGTCTCTCCACCAACTGCAGAACGATCCTGTCGGTCACCACATCGCCCGCAACTTTGCCCTGACGCATTTTGTGAAGTGGAGGAAATACTGGGAGGAGCACCAGCTGGGGGAGAACAAGCGCCGCAAAATGTTTTCTGAGATCCTGGAAGACTGA
ENSXETG00000019042	dctd	0.39944620209785753	dCMP deaminase [Source:Xenbase;Acc:XB-GENE-971992]	ATGAGCGAAGATTGCGCTTCAACCAATGGAATGGCAGCTAATTCTCTGTCTAAGAAGCGAGAAGACTATTTGGAATGGTGTGAATATTTTATGGCTGTAGCATTTTTAGCAGCTCAGAGATCTAAAGACCCAAACTCACAGGTCGGTGCATGCATTGTGAACTCCGAGAACAAGATAGTTGGAATTGGATACAACGGTATGCCTAATGGCTGTCACGACGATGTGCTCCCATGGGCCAGGACTGCAGAGGATAGGCTTGATACAAAATACCCTTATGTTTGCCATGCTGAGCTGAATGCCATAATGAACAAAAACACTGCTGACGTGAAAGGCTGCACCATGTATGTTGCTTTGTTTCCTTGCAATGAGTGTGCCAAACTTGTCATTCAGGCTGGTATA…
ENSXETG00000014501	slc9a2l	0.23597370059576858	solute carrier family 9 member A2 like [Source:Xenbase;Acc:XB-GENE-6464693]	ATGAAGATGGTACCATACCTGTGGATTCTGGGCATTTACTACTTGCAACTTCAATGCATCTGTGCATCCTTTGTCACAGGAAATCAAAAACAAGTCCAAATTCCTAAAAACATCAGTATATTAATCCCAAATGACTTTGGGTTGGAGCTGGCCTCTGGAGATCAGCGTGAAAGCAATGTATCATCTAGGCTGAAAATATTCTCAATGGGTTATTATCATGTCAGAATTCCATTTGAAATCACATTGTGGATAATGCTAGCTTCATTAGCTAAAATAGGCTTTCATCTCTCCTACAAGTTACCATCAGTGATACCGGAGAGTTGTATCTTGATAATTGTGGGACTCATCATGGGGGCAATTATTTATGGTGTGAAGGATAAATATGTTCCAGTGATGAAC…
ENSXETG00000014943	wrap53	0.018052248162851198	WD repeat containing, antisense to TP53 [Source:Xenbase;Acc:XB-GENE-5947963]	ATGTTGGGCAGAGAGGAGGAAGATGAGGATTTTCAGGGCCCTGCAGCCAAAGTGGCACGTCTGGATGATTCCGCGCCAGTCTGTGATGTTTGTTTGGGGGACGGAGCAGAGGAAGCAAATCTGGCGGGAGAGCAGGGAACGGAACCAGAAGCAGAGACTGAGGAACCTACTGAGCACTTGGAAGAATCCTATTGCTCCTCCCAGTTTGACTTTTCCTGTCAGCCCTGGGCACTCGCGGGAGCTTGGCATGAATATTCAGCGCTGCCCGAGAACTTCCTGAAAGGCTGCAAATGGGCCCCTGACGGTACCTGCCTGCTGACCAACAGCGATGACAACATCCTGCGGATATATAACCTGCCCTCTGAGCTGTACACAGACAACTGGGAGATAGCGGAGGAA…
ENSXETG00000008282	slc27a6	0.3097110109927991	solute carrier family 27 member 6 [Source:Xenbase;Acc:XB-GENE-491992]	ATGTCTGTATTGCCTTCAGTTTGCGATATCTTCCCTAGCCCTGTCTGTATCTGTGCTTTCATTGGTCAGTTTACTGTCTGTCAAAAAAGCTATGCCCTGATTGGAGAACCCACAAGAAGAAAGATCCAATTAGAACATAGCTGTTTACAGCAGAAACGGAGCTTGCAAGAACTGGAGAAGCTTTTTTCGCCATCAGCTGATCTCCCCATGGCTCTGCCTTGGATTGCAGCAGGGCTGGCCGGCTTGCTAGCGCTGCATTTCTTACAAAAGACATGTTTCCCTTACTTTTGGGCTGACCTCATATACCTTTTGAAAGTAGTGCGATATGGACTCCGCATTGAGATATACAAGAGGACGGGCAGTGTTGTCACAGTGGTCGATAACTTTATGGAGCAAGCT…
ENSXETG00000015945	pkd1	0.4922147719530774	polycystin 1, transient receptor potential channel interacting [Source:Xenbase;Acc:XB-GENE-483409]	ATGGTGTGTGGGGGGGGGGTGGATGTTGGAAGGAGGACCCTTGGGCCCCGAGTGTCCCACTCCGACGCTATGCAGAACCATGCTTTTCTGGCACTTAAAGCTCCTGAAGTAGCCTGTGTGCTATTGCCTTTAAGCACAATAGACCTGAGTGACAATCCTTGGCTGTGTGACTGCCACCTCTACTGGCTCCCGTGCTGGGTTAGGGACGTTGGTGTTTCAGTTCAGCAGGAAAACTCCACTCTCTGTGACCAGCCCTCGGCGTTGGCCGCTCAGCCCTTGCTGAATCTCTCCTTCCCCGGGTCTTGTGCTGATTTCATAGCTTGCCCGGACAACTCATCCATCCACAACGAATCAGTGCTGATTTTCACTCCGTACAACTCGGCAAGCGTCAATAATGTC…
ENSXETG00000010928	ehmt2	0.198316094450644	euchromatic histone-lysine N-methyltransferase 2 [Source:Xenbase;Acc:XB-GENE-487387]	ATGGAGGCGCCGGCGGGAGAAAGCGAGAGAATGCTCTCAGCAGAGGGGGCTGATAAAGAAGGCTGTCCTGAAAGAGATCTAGTTGGCTTGTCTGCAAGCATTAATAGTGGCGATGACAATGCTGAAGAGTTAAGTAACACCAGGGAAATTAGTCCAGCTGATGTGATTCCCACAGTAGAGGAGAAAGAAGAAACTGAGAAGGAAAGTGTAAACATCTCCCCGGTTGGGAGGGGACTTTCTGGCCATGCCTCAAAGTCTCTGCCAACACCTCCTTCAACTTCTTCCTCACCTATTTCCAGCAGAGCCAAGATGTCTTTAACAGGAACTGGCAAGCTCCCCCACGCTGCACAGAGCTTGGCAATGAGACTCCTGAATATCACCAGGGATGGAGCAGACAAG…
ENSXETG00000031975	sult2a1	0.16262433757908692	sulfotransferase family 2A member 1 [Source:NCBI gene;Acc:100144988]	ATGGCATTTGATTATTTCCTGTACAAAGGGGTAAAGTTTTCCCCAGGCTCGTACTCAGAAGAATTGCTTAATTCTGTAGAGAATGAATTCCAAGTGCTGGATGATGATGTTTACATTGTGACCTATCCGAAATCTGGGACTAATTGGCTGATAGAGATTTTGAGTCTTATCAAGAAAGATGCAGACCCTAACTGGGTAAACAGCGTGGTAATATGGCTGAGATCTCCTTGGATTGAAACTAAAGAGGGACAGCAGCAAATAAAGGACGTATCCCGCCCAAGGGTTCTAACATCTCACCTACCATTCCATATTTTTCCCAAGTCTTTCTTTACATCCAAAGCCAAGATCATTTATGTAATGAGGAATCCAAAGGATATTTTTGTGTCGCTCTTTTTTTTT…
ENSXETG00000027667	abitram	-0.25331178197214527	actin binding transcription modulator [Source:Xenbase;Acc:XB-GENE-6458491]	ATGGCAGAGGAGTGTAACAAGCTGCTTGAATTCCCCTCAGTGGTAGATCGATATTTTAAAAGATGGTACAAATCAGATGTAAAGGGAAAGCCATGTGAAGATCATTGCATACTTCAGCATTCAAATCGAATCTGTATTATTACACTAGCAGAATGTCACCCACTTCTTCAAAATGGAAAAACCATTAAAACTATTAGTTACCAGATCAGTGCCAATTGCAGCAGACTGCAGAACAAAGTCTCTGGAAAATCCAAAAGGGGAAGACCCTTCATTTTTCAACAAGATAATGCCAGACCACATTCTGCATCAATCACAACATCATGGCTGCGTAGGAGAAGGATCCGGGTACTGAAATGGCCAGTCTGCAGTCCAGATCTTTCACCTATAGAGAACATTTGG…
ENSXETG00000000635	atp13a1	0.424906958590223	ATPase type 13A1 [Source:Xenbase;Acc:XB-GENE-984166]	ATGGCGGCGGCTTTAGTGAATGGGGCCGGCTCGGAGGCGCAGGATGATTTGGTACGCTCCGTAACCCTGTACCGCCGCCGGCCCCATATACTGAGAGGCACGGTGCTGCCCTTCGCTCTCCTCTATCCGGCATGGCTGTACTGCTGGGTGGCGGTGTATGGGACGGACGAGTACCCGGAGGCTGGGCTAATCGCACTGGCGGCGCTTGGGCTCCTTCATGTTCTCACGGTTCTCTCCGGGCTCTGGTCGGTACACGCCCATTGTGCGCTCACCTGTGCCATGGAGCCGAATATTCATACAGCCACTTTAGCCAAAGTTGTGCCCACTCCCAACAATGGATCCCCTGAGTTAGTGCCGTTAATTAAGGAGAAGCAGGAAGATGGAAAAGAAAACATCTTC…
ENSXETG00000003464	dlg1	0.23617096324845263	discs, large homolog 1 [Source:Xenbase;Acc:XB-GENE-1016132]	ATGCCTGTCAGGAAGCAAGATACTCAGCGTGCATTGACCCTTCTGGAAGAATACCGCTGCAAACTTCACCAAACTGAAGACAAACAACTCAGGAAATCTATTGAGCGTGTAATTGGCATCTTTCAGAGCAATCTTTTCCAAGCTCTTATAGATATACAGGAATTTTATGAAGTGACCTTACTGGACAACCCTAAATCTAGTGACAATGCTAAGCCGACTGAACCAGTGCAGACTATAAATACATGGGAGTATTCCAGCCTTCCTAACTCAACAGCAACTTGTGAAACTCTACCAAGCAGCCTTATTTTAAATGTTGAGAAATATCGATATCCTGATGATGATATCACGTCACAAGAGCCCAGTTCCCCACACATGCTTAATGATGGAAGAAATGTAGAA…
ENSXETG00000036814	NA	-0.455378164279573	NA	ATGTCTCGCTACTTACGTCCTCCAAACACCTCGCTGTTCGTCAGGAACGTAGCGGATGATATTAGATCTGAAGATCTGCGTCGAGAGTTTGGTCGTTATGGTCCTATCGTTATATGCACCTTTATACCTGGTCAGCTCCCCTTACCTACATACCTGCTGCACCCCTGA
ENSXETG00000030358	glyctk	-0.144661199095742	glycerate kinase [Source:NCBI gene;Acc:780084]	ATGATGTCTTTGCAGACAGATGCCAAACAAATATTTTGGAAAGCAGTTTCTGCTGTTCTGCCACCCAACATGTTAGGGCGAAATGTAGCAGTGAAGGATAATGGTGATGCCTCTGTTCTGCAGTGTGGGGGCAAAGAGTTGCCTTTGCACAACAACCTCTACTTGGTAGGATTTGGAAAAGCCGTACTTGGAATGGCAGCAGCAGTGGAGAAAATAGTTGGAAAGCATCTGCTTCGGGGGGTAATTAGTATACCGAGAGGGATGGAAGAGACTCTTAAACAAGCTGGAAAGAGGGAAATGCTCCTGTCTCCAGACTCACGGATCCGGGTGATGGAAGGTGCAGAACACAACATGCCAGACAAAGCAGCACTGGAGGCAGCTAGAGAAATACAGAGCCTT…
ENSXETG00000020378	mef2d	-0.738530537217112	myocyte enhancer factor 2D [Source:Xenbase;Acc:XB-GENE-483879]	ATGGGGAGGAAAAAGATCCAGATTCAGAGGATCACAGATGAACGGAACCGACAGGTGACGTTCACAAAGCGCAAATTTGGCCTGATGAAGAAGGCCTACGAGCTGAGCGTCCTGTGCGACTGCGAGATCGCCCTCATCATATTCAACCACTCGAACAAGCTATTTCAGTACGCCAGCACCGACATGGACAAAGTGCTGCTAAAGTACACCGAATACAACGAGCCCCACGAGAGCCGGACTAATGCAGACATCATAGAGACATTAAGAAAGAAAGGTTTTAACGGGTGTGACAGCCCCGAGCCCGATGGGGATGACTCGATTGACCAGAGCCCCCTCATGGAAGACAAGTACCGCAAGGCCAGCGAGGACCTGGACATTCTGTTCAAACGATACGGTTCT…
ENSXETG00000026124	cpb2	0.30199167805735716	carboxypeptidase B2 [Source:Xenbase;Acc:XB-GENE-969491]	ATGAAGAACTATTTAATCATTTGTATTCTGGGGCTTTTTGTTGTGGATTTTCAAGTTTCTGCAGAAGACAGCGACCAGGTGTTATATGTCCTTCCTCGGACTGACCAACAGGTTGAAATTTTGAAGAATATAACGTCCCAGCCAGAGATTGTTCTGTGGAAGCCTGATTCTAATGAACACATAATGAAAAATAAAGAAGTTCACTTTTATGTGAATGAATCTTTCATAGACACGGTGAAGGCAGAGCTGAATGAATCTTCGATTTTGTACATGGTTTTGGTTAACAATGCCCAAGAACTTATTGAACAGCAGACATTTAATGATACTAGCAATCAACGCAGTGCTACTTCTTTTTATGAGCAATATCATACTCTTGAAGACATATACTATTGGATGCAA…
ENSXETG00000014976	slc39a6	0.2901258363813458	solute carrier family 39 (zinc transporter), member 6 [Source:Xenbase;Acc:XB-GENE-986480]	ATGATTACTCATTCGCACAATAAACCAAACTATCAGGAATATGTATCAAGAGGCTGTGAAAATAAATGCCATTCCCATTTACATGACACTCTGGGGCAGACCGATGACATGAGTCATCACCATCATGACTACCATCATATCCTTCACCACCATCACCATCAGAATCACCATCCACACAGCCATTCACAACGATATTCCAGGGAAGAACTTAAAGATGCTGGGATTGCCACTCTGGCCTGGATGGTTATTATGGGTGATGGACTGCACAATTTTGGTGATGGGTTAGCAATAGGAGCAGCCTTTACTGAAGGTTTATCTAGTGGACTAAGCACTTCCGTGGCAGTTTTTTGTCATGAATTGCCACATGAGCTAGGGGATTTTGCAGTTCTTCTGAAATCT…
ENSXETG00000023757	scd	0.5480447148020293	stearoyl-CoA desaturase (delta-9-desaturase) [Source:Xenbase;Acc:XB-GENE-988226]	ATGACTTTCAGGGGCAGTCAGACTGTGTCAACAGTAATGGAAAGTCCTTCCATAATACAGGATGAAATTGGGGCTGACAGAGTCATGACAGATGACATATTTGATACTACATACATTAAGAAAGTGGATTTTAAGCCACCCATCAAACTGGTTTGGAGGAATGTAATCCTGATGGCTCTGCTGCACTTTGGAGCATTTTATGGACTGTTTATGATACCTGCTGCAAAGCCCATCACTTTGGCATGGGCAATTCTGTGCTTCATGTTGAGTGCTCTTGGGGTGACAGCTGGTGCACATCGTCTCTGGAGTCATCGTTCCTATAAGGCCAAACTTCCCCTTAGGATATTTTTGGCAGTTGTAAACTCTATGGCTTTTCAGAATGACATTTATGAATGGGCA…
ENSXETG00000038197	kcne4	-0.15530466174532948	potassium channel, voltage gated subfamily E regulatory beta subunit 4 [Source:NCBI gene;Acc:100490086]	ATGTTGAGGATGGAGGCAACTAATGGGACCATGGCAAGCCCAACTTTCAGTTTGTCTGTGGATCACCCAAGAAAAATTAACAGTGAGAATGACAGCCATGAGTACTTCTACATTTTGATAGTTATGGCTTTCTATGGAATATTTCTTATGGGGATCATGCTGGTCTACATGAAAACTAAAAGAAGGGATAAAGAATCCAATTTATTGCTTCTTTGCAATGATGAGGAGAGACAGTGGTTGAGTGGCAAAAGGACCACTCCTGCTTTGTCAATACCTCTATCTCTACAGGCTTCCAGCATGTTCAGTGCTCTCCAAGAAAACGTGGGCCCTGCTTTCTCCTGTGCTGCCTGCAGTATGGAAGGCAGCAGTCTGAGTTCTGAGTCCTCAACATCTGATGTC…
ENSXETG00000015769	nrcam	0.541059447069588	neuronal cell adhesion molecule [Source:Xenbase;Acc:XB-GENE-489769]	ATGCAGGAGAAGAAAAGCACTTTCCCAAAAAGAGCTTCTTTGGTTCTCTTCCTGTGCCAAGTAATTACTGCGCTGGAAGTACCACTTGACCCTATACTACAAAAGGAATTGCTCCAGCCTCCAACCATAACGCATCAGTCACCAAAAAACTATATTGTGGATCCAAGAGAGAGCATTGTGATTCAGTGTGAGGCAAAGGGGAAGCCTCCACCAAGCTTTTCATGGACTCGCAATGGCACGCATTTTGACATAGATAAAGATCCATATGTGACAATGAAACAAAACTCCGGAACCCTGGTAATTAATACCATGAATGGCGCAAGAGTGGAAGCATATGAGGGTGAATATCAGTGTACTGCCAGGAATGATCGAGGTTCTGCGCTATCCAACAACATTGTT…
ENSXETG00000021846	dpf3	0.0713487391248567	D4, zinc and double PHD fingers, family 3 [Source:Xenbase;Acc:XB-GENE-6067294]	ATGGCGACTGTCATTCACAACCCACTGAAACCGCTTGGAGATCAGTTCTACAAAGATGCAATCGAACACTGCCGAAGCTACAACTCCCGCTTATGCGCCGAGCGCAGCGTCCGCCTTCCTTTCCTGGACTCCCAGACTGGTGTGGCTCAGAATAACTGTTACATATGGATGGAAAAGAGACACAGGGGGCCAGGAATGGCTCCAGGGCAGTTATATACTTACCCTGCACGATGTTGGAGGAAAAAGCGGCGTTTACACCCCCCAGAAGATCCGAGGTTGAGACTATTGGAAATAAAATCAGATGTTGACTTTCCTCTGAGGAAGGACAATGTTCTGGCAGAAGGAACGACACTGGAAGCCTTGCTACGAGGTGAAGGAATTGAGAAGAAAGATGTTCGA…
ENSXETG00000015092	gbp1	0.09991506227440991	guanylate binding protein 1, interferon-inducible [Source:Xenbase;Acc:XB-GENE-6045650]	ATGAGCGCCCAAATCCATATGACGGATCCAATCTGCCTGATAGAGAACAGGAACAGCAATGAGTTTGTGATTAATACAGAAGCAGAACAGATTCTGTCTCAGATCACTGATCCGGTGGTGGTTGTGGCGATTGTTGGGAAATACCGGACAGGGAAATCTTATCTGATGAACAAACTGGCAGGAAGGAAAACTGGTTTCCCTTTGGGATCCACCATTCAATCAAAGACTAAAGGGATCTGGATGTGGTGCGTTCCTCACCCTCGCCAACCCTCACACACCCTGGTGCTGTTGGACACAGAGGGACTGGGGGATGTGGAAAAGGGAGACAGCAAAAATGACGGCTGGATCTTCTCTCTGGCAGTTCTGTTAAGCAGCAACTTAGTGTATAACAGTATGGGA…
ENSXETG00000022907	nagpa	-0.02895218757588927	N-acetylglucosamine-1-phosphodiester alpha-N-acetylglucosaminidase [Source:Xenbase;Acc:XB-GENE-996371]	ATGGTGTTGCCCGGACACAGACACGTATTCGGATCTGATCCAAAGCAACTGATCTGCAGGGATATGCTAAAGTATTTACTGCTTTTGCATTGTTGCCTTCATATTAGTGCCAGGAATTCATTAAATGATGATTTATTATCACCATATCCACTACATTCTAAGCATGGACCAAGTCATAGTCATCGTCAAGTTCGAGATTGTCAGCCTGTTATTGATGGTAATAGAACACATGAAGAGTGGCCCAGCAGTAATTCTACCAGGCTCCCAGTTTCTACCACAAGAACCTTTGAATCAAAGTTTTCCTCTACAGGTGGTATGAAAACAGTGTATGGCCATTTCACATTCATAAGTAATCCTTTGAGGTCTTTCTCTGTATTGGAACCTGGAGGACCAGGTGGT…
ENSXETG00000004856	ube2v2	-0.028638883227614015	ubiquitin conjugating enzyme E2 V2 [Source:Xenbase;Acc:XB-GENE-1015103]	ATGTGGCATGGCTTGTGCTGTCCAACCATAAAACACTGCCATGTCCAGCTTTGTTCTGTCCCCTGCACCATCCAGTTGCCCTTCCTTCGTTTGCTGCACCCCTTCCTGCACATATTTTGCAATGGCCCTAAACATCTTTGCTCTACAGGATCCAGTGTTAAGATGCCTCGTAACTTCCGATTACTGGAAGAACTTGAAGAAGGGCAGAAAGGTGTGGGAGATGGCACTGTCAGCTGGGGCCTTGAAGATGATGAAGATATGACACTCACTAGGTGGACAGGAATGATAATTGGACCCCCTAGGACAAATTATGAAAATAGAATTTACAGCTTAAAAATAGAATGTGGACCTAAATACCCAGAAGCCCCACCGACAGTTAGGTTTGTAACAAAGATGAAT…
ENSXETG00000012222	cox6a1	0.4407244182479173	cytochrome c oxidase subunit 6A1 [Source:Xenbase;Acc:XB-GENE-855918]	ATGATGGCTGCTCTTGGAAGGCTCTCAGGAATTCTTCGTGGCTCATTGCCCAGCCGTGGTAGACTATTTTCGGCAGCAGCTTCAGAGCAAGAACATGCCGGGGCGGTTCGCACCTGGAAGATCCTGACCTACGTTGTAGCTTTGCCTGGTGTCGCAGTCTGTATGTTGAATGCCTACCTGAAGATGCAACATCATTCCCATGAGAACCCCGAGTTTATTCCATACGAGCACTTGAGAATCCGCACAAAGAAATTTCCATGGGGAGATGGAAATAAGAGTCTGTTCCACAATGCTCATGTAAATGCTCTTCCCAATGGCTATGAAGAGTCAGAACATTAA
ENSXETG00000002939	scg2	0.5775490078070264	secretogranin II [Source:Xenbase;Acc:XB-GENE-954296]	ATGCTGAGCCTGAAGCACACAGGAAAATTAAAAATGGCTTCTCCAGGTTGTTGCTACATTGAGAAATGCCTGTCCTTGTCATTTTTACTGCTTTTCACATCTTTTGCTGATGCTGCACCCTTTCAATATTACCAAGTGCCACAAGACCCCGAATACAGAATGAAAAGTATCCAGCGCCTTCCCAGCCCAGATATGCTGAAGGCTCTGGAGTATATCGAGAACCTCAGGAAGCAAGCAAACAGACCAGAGAGTCTACCGGACTATGTATCCTACCAAGGGGCACCATATCTGTCAGAGCAGAAGGATATTAGTACACCAGGCATTTCACCAGAGAATGCAAAAAGTCTAGCTATAGATGATGAATCCGAATGGATGAGAGTCATGTTGGAAGCCTTGATG…
ENSXETG00000031472	tenm2	0.337334653756193	teneurin transmembrane protein 3 [Source:HGNC Symbol;Acc:HGNC:29944]	ATGGATGTAAAAGAACGAAGGCCTTACTGCTCCCTGACAAAGAGCCGCAGAGACAAAGAAAGGCGCTACATTAATTCTTCAGTGGACAATGATGGGTGTAGAGTGCCTACACAAAAGTCCTACAGCTCAAGTGAAACCCTGAAGGCTTTTGATCATGATTCCTCCAGGCTTCTGTATGGAAACCGAGTTAAAGATCTGGTTCACCGAGAGGCAGATGAATATCCAAGACAAGGTCAGAATTTCACTCTACGGCAGTTGGGTGTCTGTGAACCAGCATCACGCCGGGGACTGGCATTTTGTGCTGATATGGGGCTTCCACACCGAGGTTACTCCATCAACGCAAGCTCCGATGCCGAGACTGAGAATGAAGGTGTCATGTCGCCAGAACATGCCATGAGA…
ENSXETG00000039796	rad1	-0.11216364977992938	NA	ATGCGCTCCCTCAGCTATGTGCAACAAGCAGTCCTGGAATTCAGCGGCTCCCTGTTCCCTCACGCCCTGTGGAGCAGACTCACGTGTGTTGGGGTAGGCGATGTTTGCAATAAAGGAAAGAATTTTGTGATTGCAGTCAGCGCAGAAGGCTGGTTTCACCTCTTTGACTTGTCCGCCAAGCCTGAAGGCCCATTGGACCCTTTGCAGGGGGATGAGCAGAAAGCAACCTATACCCAGCACCTCCCAGCCAACACGAAGCTTGCTCTGATCAGTGATATTGATGGGGACGGACTCTGTGAGTTGCTTCTGGGGTACACAGACCGAGTAGTGCGGGCTTTTTGCTGGGAAAGTCCCCCGGATGCTGACCTGACATGTGGCCAATTGGTGGCCCTAAAGAAA…
ENSXETG00000027666	tmeff1	-0.17866904017555724	transmembrane protein with EGF like and two follistatin like domains 1 [Source:Xenbase;Acc:XB-GENE-876375]	ATGGATGGATTGCACCCTGCCTCCTGGATGCTGCTGCTGGGATCCCTTGCTTTCTGGTCCGCATCCTCCTTACTCCTCTTCTCCTTAGCTCTACCGGGTGTTCGAGCATCCAACCCACTGCCCAGCGAATGTCACAATGGCAAAGGCAAAGCTGGAATTAACTGCTCAGAACTGAGCTTGAGGGAGTCTGAAGTCCGACGAGTGTGTGATGAGTCTACATGTAAATATGGAGGAGTGTGCAAAGAAGAAGGGGATGTTTTGAAATGCATCTGCCAGTTTCAGTGCCAAACAAATTATGCTCCAGTGTGTGGCTCAAATGGGGACACTTACCAAAATGAATGCTTCCTGAGGCGCTCTGCCTGTAAACAGCAAAAAGAAATCACAGTAGTAGCAAGAGGA…
ENSXETG00000002765	twf2	0.551358884952879	twinfilin actin binding protein 2 [Source:Xenbase;Acc:XB-GENE-5878659]	ATGAAGCTCACCGATAATGTGCTCCGAAGTTTCCGTGTGGCAAAGGTCTTCCGGGAAAACTCTGATAAAATAAATTGCTTTGACTTTAGTCCAACTGGTGAAACAGTCATATCCAGCAGCGACGATGATTCAATTGTGCTTTATGATTGCCAGGAGGGGAAGCCCAAGAGGACGTTGTACAGTAAAAAATATGGTGTTGACCTTATCAGATATACACATGCAGCTAATACAGTGGTCTACAGCTCCAACAAAATTGATGACACAATACGATACCTCTCTCTTCATGATAATAAATACATCCGTTATTTCCCTGGACACAGCAAGAGAGTAGTTGCTTTGTCTATGTCTCCTGTGGATGATACGTTCATTTCTGGGTCATTGGATAAAACCATCCGGTTA…
ENSXETG00000033617	NA	0.47233981963211824	multidrug resistance-associated protein 1 [Source:NCBI gene;Acc:100493583]	ATGCTGAAAGCATTCATAGGGAGCAATGTTGCCTACGAACGGATCTCTAGCAACGGCAAGAAAGACAATCCTGAGAAGAATGCATCTTTGCTCAGCCGGTTGACCTATTCCTGGTACAGCAGAATAATAACACTTGGTTACAAGAAGCCATTGGAAAGAGAAGATCTTTTTGAACTCAATGATAATGATTCCTCATACACTGTCATCCCAATCTTTGAGAAGAACTGGAGGAACGAAGTAGCAAGACAGGGCACGGTGTCCAAGAATGTGTCCCTGTTGCGCGCCTTGTGGAACACCTTCAAGTACTCACTTATCCAGGTGGCTTTCATGAAAGTGATAGCGGATATATTGGCCTTTTCAAGTCCTCAGATTTTAAAGCGAATGATAGCTTTCACCGAG…
ENSXETG00000020965	rnf34	-0.5607712574182476	ring finger protein 34, E3 ubiquitin protein ligase [Source:Xenbase;Acc:XB-GENE-955597]	ATGGTTCCGTGCTATAGTAAGGCGGGGGCCAGCTCCATGTGGGCTTCTTGCTGTGGCTTGCTGAATGAAGTCATGGGTACCGGAGCCGTGCGAGGTCAACAACCAGGTTTCGGAGGAGGAGCTGGGCCATTTCGATTTACATCAAATACGGATTTTTCTCCTTATCCTTCCTCTTCCTCTAGCAGCATTGTGTGTAAAGCATGTGGACTAGCATTCTCTGTCTTTAGGAAGAAGCATGTGTGCTGTGATTGCAAGAAGGATTTCTGCTCAGTGTGCTCTACACCTCAGGAGAACTTTAGACGCTGCAGTACCTGCCATCTGCTACAGGAGACAGACTTTCAAAGGCCTCAGCTAATGAAGTTAAAAGTAAAGGATCTGCGGCAGTATCTATCCCTTAGA…
ENSXETG00000009697	cfap61	0.11561579250625251	cilia and flagella associated protein 61 [Source:Xenbase;Acc:XB-GENE-5796298]	ATGATAACTTTAACTTCATCAAGTGGAAGAAAGGACTTTGTTACTGTCAGAAGAACAGAATCACTAGATGTTCATGGCATCATTAAGCGAAAAACAACCACCACAGAAAGGATATTTGGGAGAGTCAATGTCATATATCTGCTGGAGAAAGCAAACTTGGCTGTGACCGTCTACAGTGCAAAAAATGGTGTGGTGGCCAATGCTGTCCTCTTGGATTATCCAAACTGCGATATTGTGGATCAGGCAGAGTGGGAGGAAAAGCTGCCTACACACTATGAAGAGCTGAGCAATTGCACACCTCTGAACACACTGTTTCTGCACCTTTTTGTGGCCAAAGACGAATATTCTGAGCAGTGTATTCAGGAGATCATACGGGTGGTGTTCAATACAGCCCCATAT…
ENSXETG00000012223	triap1	-0.18412822395185396	TP53 regulated inhibitor of apoptosis 1 [Source:Xenbase;Acc:XB-GENE-949263]	ATGAACAGCGTGGGTGAGGAATGCACGGATATGAAGCGGGAGTATGACCAGTGCTTCAACCGCTGGTTTGCGGAGAAATTTTTAAAGGGAGAATGTAGTGGCGATCCGTGCACCGAGCTCTTCAGGCGGTATAGAGATTGTGTTCAGAAAGCCATTAAGGACAAGGACATCCCGGTGGACGGAGTGGACTTTATGGGGCCTAGTAAATCAAAAACAGAATCCGACGGCTCCTCCTGA
ENSXETG00000023760	wnt8b	-0.02089048425819931	Wnt family member 8B [Source:Xenbase;Acc:XB-GENE-492636]	ATGTTTTACACTGGATCCTTTTGGTTCATCGTCTTTATACTTCCAGCAATTCAGTTTTGCCACTCTTGGTCAGTGAACAATTTTCTCATGACTGGTCCCAAGGCCTACCTTATTTACTCAGGCAGTGTGGCTGCTGGAGCACAGAGTGGTATTGAGGAGTGCAAATACCAGTTTGCCTGGGATAGGTGGAACTGTCCTGAAAGGACCCTTCAACTCTCCAGTCATAGCGGGCTTCGAAGTGACTCGAACCTCCATTCCACAGGAATCTCTACTGCAGGCAGCAGCCTCTATGACACTGGACCTACTTCCCCAGTCTGGAGCACTAATTTCAACCGGATCCTCTTCTCTAAACTGGAATCCCATTTCAACAAGACCTTCTTGTCCCGTCTCCAGATCCCA…
ENSXETG00000033169	ap1s3	-0.022312607038104476	adaptor related protein complex 1 subunit sigma 3 [Source:NCBI gene;Acc:549333]	ATGGCAGCGGAGATCCGCTCCCGGTCTCCGCGGGGCCCCGTACTTCTCACTAAGATTCCCGGGCATAGGGAGCAGGTGGCTGCGGCCAGATTGATTCCGCGGGAGGATGGAGTTATCACGGCCAGTGAGGACAGGACTTTGCGAGTATGGCTGAAGAGAGACAGTGGGCAGTACTGGCCAAGCATCTATCACACAATGTCATCTCCCTGCACAGCTCTGCGGTACCATCACGAGAGCAGGAAGATTTTTGTGGGCCAAGATACTGGTGCTATAGTGGAGTTTCTTATCTCAGATGACTTCAACAAAATGAATTTTATAAAGACATACCCAGCACACCAGAGCCGGGTGACTGAAGTTATCTACTCTCCAGGGACCGAATGGGTAATCAGCACAGGGCAT…
ENSXETG00000030338	NA	0.336163457575688	calpain 8 gene 3 [Source:NCBI gene;Acc:100498169]	ATGTCTGGCATTGCGACTAAAGTGGCCAAAGACAGGATTGTGGCTCAGGGTCTGGGCACAAATAATAAGCCCCTGAAATACTTAAACCAGGATTATGGGCAGCTGAAGGCGCAGTGTCTGGCGTCTAACTCTCTGTTTGAGGATGAGCCCTTCCCTGCAAGCCAAGCGTCTCTGGGGGTCAAAGAACTCGGACCCGATTCTGACAAAACCAAAGGGATTGTCTGGCTGAGACCGATGCAAATTCATCCCAAACCGGAATTTATTATCAGTGGCGCAACCCGCTCTGACATTCGCCAGGGGTCCCTAGGGGACTGCTGGTTCCTTTCCTCCATTGCTTCCCTTACACTGAATGAAGAATATCTGTCCCAGGTCGTTCCGGGGGATCAGAGCTTTCAGACC…
ENSXETG00000038984	NA	-0.2657235189563691	NA	ATGATACGCCTGGGGAAGCTGAAGGTTGTACGGCGGCGCCTCCTGCAGCGCTATGAGCATCAGCCATTCGTATCCCTGCTGGCGGGATTGTACAGCTGCCGATGGAAACGCTATCAGCGCCAGAAGACAGAGCCCGGGCAGTGCTGCTGCAAGCTGGAGCACCTGTTCTTTATGGTTGTGCTCGTGGCCTTCTGCCTCTCCTTGATCTTCTTATATTTCTGGCAGGAAGCAAAGAACGACTACAACGACTTTGATTGGATCTCCTATTTGAAAGTGGGGTATTGGTTCCTTTGGTCCACAGTAGTTCTGGTGGTGGCAGCGGTTCTGTTTGGATACATTGCATTATTGCTGGTAAGTCTCGTGCATTATATATGTAGCACCTTTCTGAATACACCCGCT…
ENSXETG00000011038	sf3b4	-0.01569799192178048	splicing factor 3b subunit 4 [Source:Xenbase;Acc:XB-GENE-492933]	ATGGCGGCTGGGCCGATATCTGAACGGAACCAGGATGCCACGGTGTATGTCGGAGGCCTGGATGAAAAGGTGTCTGAGCCTCTTCTATGGGAGCTCTTCTTGCAAGCAGGGCCTGTAGTGAATACACACATGCCCAAAGACAGGGTCACGGGGCAGCATCAAGGTTATGGCTTTGTGGAATTTCTGAGTGAGGAGGATGCCGACTACGCCATAAAGATTATGAACATGATAAAGCTCTATGGGAAACCCATTAGAGTAAATAAAGCCTCGGCGCACAACAAAAACCTGGATGTCGGCGCCAACATCTTCATTGGAAACTTGGACCCAGAGATTGATGAGAAGTTGCTTTATGACACCTTCAGCGCTTTTGGTGTAATCTTGCAGACCCCCAAGATCATG…
ENSXETG00000036577	NA	0.11362401924083029	NA	ATGACCATGCAGAAGCTTCTATTAAGTTTGATTCTTGCCAGCTTCACCGATCCTCTTTTGTCGCTTCCATTAATTGATTCCAGAGAAATTCCATATCAGTTTCCGGATGGCAAGATGAATTTTGGAGAGTTAAGCAGCCTGGATGAGGACGACTTACTGCACAACTTACCTGCAGTCCTGGCCAAACATAACCTGATTGGGGATACAGATGCACTCATCATTTCCTTGCAAGAAAATCTCCTGCAGTCAAAAGACAAGAAACAGTACAAAAAACGTGGGAATTTATCCGAATGCTTCTGGAAGTACTGCGTCTGA
ENSXETG00000004727	prrx1	0.006500011581539539	paired related homeobox 1 [Source:Xenbase;Acc:XB-GENE-484663]	ATGACCTCCAGCTATAACCACCACGTTCTGGACAGGCAGGGCCCCCTGGGCAGCCGCTTGGAGAGTCCCATCACTGCCAGTCTGGACAATTTACAAGCCAAAAAGAACTTCTCGGTGAGTCACCTGTTGGATCTGGAGGAAGCTGGGGAAATGGTGGGGGCACAAGCCGAGGATGGATCAGGGGAAGCCGGCAGGAGCTTACTGGAGTCCCCGGGTTTGACCAGTGGAAGTGACACTCCTCAGCAAGAAAATGAACAGATGAATGCAGAACAGAAGAAAAAGAGAAAGCAAAGGAGAAACAGAACTACATTTAACAGCAGTCAACTGCAAGCTCTGGAAAGAGTGTTTGAGAGGACGCATTATCCAGATGCTTTTGTAAGAGAAGACCTAGCACGCAGA…
ENSXETG00000005600	pou6f2	-0.021802624732411374	POU class 6 homeobox 2 [Source:Xenbase;Acc:XB-GENE-853682]	ATGCTAGTAAGCACGCTTTCAAAGAAGTTTGCGCTCTTGAAAGATCCAATGATAGCCGGAAAAGTCAGTAAGAGCCTGCTGCTGCTGCGGAGTGAGATGAATGCAGAGTCGAGAGGTGAAGACAAGGCAGCTACTTCAGACAGTGAGCTGAACGAGCCCCTGCTTGCTCCTGTGGAATCAAATGATGGTGAGGACACTCCCAGCAAGCTCTTCGGAGCCAGAGGTAACTCTGTGTCAGCTGAATCAGGCACAAACGACTTGCATCAGCCCAACCAGACGCATCCAGGATTTCCACTTGGGCCTCAGCCGCTGCTTGCAGCACAACAGCTGGCATCAGCTGTAGCAGGAGTGATGCCAGGGGGTGGCCCGGCCCTCAACCAACCAATCCTCATCCCATTT…
ENSXETG00000035179	gatc	-0.48462402032960916	glutamyl-tRNA(Gln) amidotransferase, subunit C [Source:NCBI gene;Acc:100495297]	ATGTGGTTCCGAGCGCCGCTCTGCACCGCTTGGATTTCTGGTTTCCGACGTTCGTTGTCGGCGCAGAGTAAGGTACCGCCTAAACCAACATGGGACCTTCAACCCGAGATCAGAAACCAGAAACCCCTGATTAGCCTAGACACAATTGACCATCTTGAGCGGCTAGCATTAGTGGATTTCGGAAACGTAGAAGGCGTGCAGCGGCTTGAGAAGGCCATACAGTTTGCTGATCAGCTGCACAATGTCAACACAGAGGGAGTGGAACCTTTATCATCTGTGTTAGAAGACAGGACCCTATACATAAGAAATGATGCAGTTGCTGCAGGAAATTGTACCGAACTGCTCCTAGAAAATGCCAGAACTGTTGTAGAGGAATATTTTGTAGCACCTCCAGGTATT…
ENSXETG00000036668	hoxa7	0.3281293235041247	chloride channel protein D-Like [Source:NCBI gene;Acc:100488828]	ATGTCTAATGGAATATGTCACAAAAAGAAAGAATTTCAAGAGACACCTGAGAGCCTGAACTATTTACCTTCTCACAGTGAAGCATATAAAACATGGCTAGAAGAGAAGCCACTCGGATCAGACTGGGATCGCTGGTTCATGATGGGACTTATAGGAGTGTTTGTTGGGATTTTTGGATTCTTAATGCACCAGATAATTGATTTTCTCTTTGAAATGAAATGGGAGCTTGTAGAAAACTATATTCAAAACAATGATTTTCTTACAACGTGGATGGTTATAGCTGGAATTGGCTTTGCAATGATGCTGGTTTCATCTGGGCTAGTGGTGTTCTTCTGCCCATCAGGATCACCCAGTGGGCTTCCTGAGGTCATTGGTTATCTGAATGGGGCCTCAATCAGG…
ENSXETG00000037580	nacc2	0.29786900195028	golgin, RAB6-interacting [Source:NCBI gene;Acc:100485483]	ATGGCTGGCTGGGCAGGATTCTCCGAAGAGGAGCTTAGGAACCTTAAAACGAAACAAGGTACAGACTTACCACATCACCCTGATCGTCCACGAAGACAACCCACATCAGCCAAACCTACAGCAGCCAAAAGTCGACAGCAGATGCAGAGAAAGTTGGCTTTGCAGGTACAGAGTCAGCTATTGGCAAAGCAGGATGGATCCCTCTGTGTTCCTGCTGAGCAGCAGCTTTCCAGATCATCCATCACCTCATCACCGAATGTAATAACTTGCCCAGCTGAAAAAAAGCAAGTCATACATGATCAACCAGAAATGAGCACATCGGTTAGCCCTGGCATTGACCTCAAGGGAAAGGATTTATTCTCTGAACAAGATGGAGAGCTAAACAAAAAGGATATGGAA…
ENSXETG00000012274	hoxa9	0.24655219569962936	guanylate binding protein 3 [Source:NCBI gene;Acc:100489592]	ATGGAAGAACCCATATGCCTGATAGGAAACAAGGAAGGTGAAGATCTAATCGTTAACCAGGAGGCCTTACAGATCCTACTGGAAATCACTCAGCCTGTGGTGGTTGTGGCGATTGTTGGGAAATATCGAACTGGGAAATCATATCTTATGAACAAACTGGCCGGAGGCAAGAATGGATTTGCACTTGGATCAACCGTCCAGTCGAAGACTAAAGGGATCTGGATGTGGTGCGTGCCTCACCCTATTAAACAAGGCCACACCCTAGTTCTGTTGGACACAGAGGGACTGGGGGATGTGGAGAAGGGAGACAGCAAGAATGATGCCTGGATCTTCTCCCTGGCTATCTTACTCAGCAGCACTCTGGTGTACAACAGCATGGGGACCATTGACCAACAGGCC…
ENSXETG00000014231	smarcd2	-0.010147108299147473	SWI/SNF related, matrix associated, actin dependent regulator of chromatin, subfamily d, member 2 [Source:Xenbase;Acc:XB-GENE-489103]	ATGACCTCTCGGGGAGGATTACCTCTACCATCTGGGAGCCCAATGAACATGATGCGGGGACCAAACCCTGGAGCATACAGACCCCCAATGGGGCCTTACCAGAGACCAGGTATGCTTCCAGGCTCCCGAATGCCAATGCCTGGCATGCATATGGGCTCCCCCATGCTTCCTCCATATGGTGGGGGTTCTCCTATGAGACCTGCCATGAATCCAATGATTATGGAGCCATTTAGGAAGAGGCTGCTCACCCCATCAGGACACCCTGGGCCGAGCCATCGTAGGGGAGTAAAGAGAAGAAAGATGGCTGACAAGATCTTGCCACAGAGGATCCGTGAACTGGTGCCAGAGTCTCAGGCCTACATGGACCTCTTGGCATTTGAGAGGAAGTTGGATCAGACT…
ENSXETG00000026940	srsf9	0.11233508857854044	serine/arginine-rich splicing factor 9 [Source:Xenbase;Acc:XB-GENE-491310]	ATGTCAGGTTGGGATCGTGAGGCCGCGCGGACTGGATCCGGCGATGGACGAATTTATGTCGGAAATCTGCCAGCTGATATTCGGGAGAAGGAACTAGAGGATCTGTTTGACCGCTATGGTAGGATCCGGACCATTGAGTTGAAGAACCGGGGCGGCAGTAGTGCCGCTCCATTCGCATTCATCAGCTTTCAGGACCCCCGCGATGCAGAGGATGCAGTGTTCGCAAGGAATGGCTATGAATTTGGCTCATGTCGTCTACGTGTAGAGTTCCCCCGTTCATTCCGGGGATCTGGTGGTGGATATGGAGGTTCTCGGGGAAGGAATGGGCCGCCATCTCGTCGCTCTGAATACAGAGTCATTGTCTCAGGTCTTCCACCCTCAGGGAGCTGGCAGGATCTG…
ENSXETG00000012204	gpr137c	-0.07773098620848662	G protein-coupled receptor 137C [Source:Xenbase;Acc:XB-GENE-989120]	ATGAAAGCAGCCATCCCTTGGGCAGTGGAATTGGGACTGACGGTGCTGTACACGGTGCTTTGTTCTGCACTCTTCCTCACCATATACGTGCAGCTCTGGCTGCTTTTACACTACAAACAGAAGAGGTTCGGCTACCAGAGCCTCTTCCTGTACCTGTGCCTCCTGTGGGCATCTTTTAGGACCGTTCTCTTCTCGTTTTATCTTAAAAACTGTGCCCAGTCCAATGACCTGCAACCTTTCCCCAGCTGGCTCCTGTATTGCTGCCCTGTGTGCTTGCAGTTCTCCACTTTGTGTCTCCTTAATGTTTATTTTTCGCAGGTTATTTTTAAAGCCAGGTGTTCTCCAGAGTTTAACAAATACAAAACTCCTCTTCGTTTGGGATTTTTATTCACATGCCTT…
ENSXETG00000040150	hoxa10	-0.7951108006867571	insulinoma associated 1 [Source:NCBI gene;Acc:779614]	ATGCCTAAAGGGTTTCTGGTGAAACGCAGCAGGAAGTCCCCGCCGGTGTCCTACCGGGTGCGGGAAGAAGAAGAGCCCCGCGGGGAGTCGCTCCCGGGATGGATGCTCTTAGCTACAATGTGCCCGACCGGTGGGGCCCCGCCGCCCTGCAGCCCAAAAAGAGCCACCCAGGCCCCATGCTGCAGCAGCCCCCGGCCGCCCCCCGCCGGTCAGTTCGGGAACCCCGACACAGTGCAGCAGGCTCTGTACAGCCCGACCCGCCCGGTGAGCAGGGAGCAGCGGGAAAGGAAATACCTGGGATCCCCGGTGTCTGCGGAGTCCTTTCCGGGCCTGGGCACCTCCAGCGAAGCGCTACTCTACCCTCCCACAGGCACTGCCAATGGGCATCACGGACTGGCA…
ENSXETG00000010703	pak1	0.4129209330662458	p21 protein (Cdc42/Rac)-activated kinase 1 [Source:Xenbase;Acc:XB-GENE-967716]	ATGTCCAACAATGCCTTGGCAATTGAAGACAAGGCCCCACCTCCACCCATAAGGATCAATAGCACAATAGGCGGGGGCAATACGAACAAATGGAATGAAAAGGACAAAAAAATTAAAAAGGGTGAAGAGAAATCCCAACCTTTCAACTTTCCTCATAAAGGTAACAAAAAGGTTAAGAATCCCCCTCTGGTGATTTCCAGCCCATTTGGCTATGAGCATATCTATCACGTGGGGATTGATCCCTCTACAGGAGAATTTACTGGCATGCCGAAACAGTGGGCCCAGCTTCTGCAGACTGCAAACATCAGTAAAATTGATCAGAAGAAGAACCCACAGGTTGTTCTGGACGTACTGAATTTCTACAGTTCTGAGACAACCTCCAAAAGCCAAAAGTACATG…
ENSXETG00000036033	ssr4	0.2631809123652237	guanylate binding protein 5 [Source:NCBI gene;Acc:100145295]	ATGGCAGTGTTGCCAATGGAAGAACCCATGTGCCTGATAGGAAACAAGGAAGGTGAAGATCTAATCGTTAACCAGGAGGCCTTACAGATCTTATTGAAAATCACTCAGCCTGTGGTGGTTGTGGCGATTGTTGGGAAATATCGAACTGGGAAATCCTATCTTATGAACAAGCTCGCCGGAGCCAGGAATGGGTTTGCACTTGGATCAACTGTCCAGTCGAAGACTAAAGGGATCTGGATGTGGTGCGTGCCTCACCCTACTAAACAAGGCAATACCCTAGTTCTGTTGGACACAGAGGGACTGGGGGATGTGGAGAAGGGAGACAGCAAGAATGATGCCTGGATCTTCTCCCTGGCTATCTTACTCAGCAGCACTCTGGTGTACAACAGCATGGGGACC…
ENSXETG00000002955	polr2d	0.010872256016138587	polymerase (RNA) II (DNA directed) polypeptide D [Source:Xenbase;Acc:XB-GENE-1004238]	ATGGCTGCTGGCGGAGCGGAGGCGCACTCTGGGGACCCGGAGGAAGATGCTTCACAATTACTGTTTCCCAAAGAGTTTGAGAGTGCTGAGACTCTGCTGAATTCGGAGGTGCACATGCTCCTGGAGCACAGAAAGCAACAGAATGAGAGCGCGGAGGAAGAACAGGAGCTCTCCGAGGTCTTCATGAAAACCCTGAACTACACTGCCAGGTTCAGCCGCTTCAAGAACAGAGAAACCATTGCCAGTGTCAGAAGCTTGCTGTTACAGAAGAAGCTGCATCGCTTTGAGCTAGCCTGTTTGGCCAATCTGTGCCCAGAGACAGCAGATGAGGCTAAAGCCTTGATCCCAAGTCTGGAAGGGAGGTTTGAGGAAGAGGAGCTGCAACAGATCCTGGATGAT…
ENSXETG00000024006	snai2	-0.6451205216195981	snail family zinc finger 2 [Source:Xenbase;Acc:XB-GENE-487371]	ATGCCACGATCTTTTCTGGTCAAGAAACACTTCAACTCGGCCAAAAAGCCCAATTACGGGGAGTTGGACAACCATACAGTGATCATCTCCCCATTCCTGTATGAGCGGTACCCTGTGTCTGTGCTACCCCAGCCTGAACTCTACAGCTCGGTGGCCTACAGCCCCATCACCGTGTGGACAGGACTGCTTCACCCACCACTGCCCAGCGATCTCTCCCCTCTCTCAGGATACCCTTCATCTTTAGGACGGGTCAGCCCCCCTCCGCAGTCGGACACGTCGTCTAAAGACCACAGTGGCTCGGAGAGCCCCATCAGCGATGAGGAGGAAAGACTCCAGACCAAACTTTGCGACTCACATGCAATAGAGGCTGAGAAGTTCCAGTGCAGCTTATGCAGCAAG…
ENSXETG00000030290	evx1	0.13762130418465154	neuropeptide S receptor 1 [Source:HGNC Symbol;Acc:HGNC:23631]	ATGGAGCAGCTGATTACTCTCTGGATTTTGTTTATTGTCACTATATTTGGCAACTCAGTTGTTCTATATCTGACATGGAAGGAAAGAAAGCGGAAATCTCGTATGACTTTCTTTGTTACACAGCTAGCCATCACAGACTACCTTACAGGAATAATAAGCATCTCTGTAAACATTATATGGCGATTTACTGGCGAGTTCATGGCCCCTGAAATTGTCTGCAAAACTGTACGTTACTTGCAGGTTGTCCTTCTGTATGCTTCAACATATGTTTTAGTATCTCTCAGCATAGACCGATATCATGCCATAGTTCATCCAATGAAGTTTCTCCAAGGAGAAAAACAAGCAAAAGTGCTAATTGCGGTTTCATGGACTTTATCATTCTTATTTTCAATTCCAACA…
ENSXETG00000007996	dynll1	0.7173400144093627	dynein light chain LC8-type 1 [Source:Xenbase;Acc:XB-GENE-854521]	ATGTCTGAGAGAAAAGCTGTGATCAAGAATGCTGATATGTCAGAAGAGATGCAGCAGGATGCTGTAGATTGTGCTACTCAGGCACTTGAGAAATTCAACATTGAGAAGGATATAGCAGCCTTTATCAAAAAGGAATTTGACAAGAAATACAACCCTACATGGCATTGCATTGTGGGAAGGAATTTTGGCAGCTACGTTACACACGAAACAAAGCATTTCATTTATTTCTACCTGGGTCAGGTAGCCATCCTTCTCTTCAAATCTGGCTAG
ENSXETG00000012203	txndc16	0.3006514201206779	thioredoxin domain containing 16 [Source:Xenbase;Acc:XB-GENE-989133]	ATGGCTGGCCTGATCCGTTTAGCTACTTTTTTGTGTGTAAATAGTATTTTTATGACAAAGGCAATAAATACTTTGGATGAACTAAGATCAGATACCTATTATAGTGCCCTTATGCCTGGGAAGACATCACTACTTTATTTCACTAATCCAGCTTTTCCTAGTAATATTATTTTCCTGGATGAACTCCAAAAGTCTGCTGGGGCTCTTCAAGACTATGGGATTTCCGTCGCTAAGGTTAATTGTATGAAAGAAGACCTACTAAAGTACTGTGGGGAGGAGAATGCATATTTGTTTAGGGGTGCTAAGTTAGTAAGGGAATTTCCAACAGATGCACTTTTTGATGTTGATTCTATCGTGGCCAATGTCTTATTTGTTCTCCTTTATAATGAAGTTAAATAC…
ENSXETG00000004474	cul4b	0.235190756319643	cullin 4B [Source:Xenbase;Acc:XB-GENE-963628]	ATGTTTCCCACAGGCTTATCAACCCCCAACCCCCCGGCGCAGGAGGTAAGGACTGAGGGAAACAGCACCTCCAAAAAGAGAAGGTTGAATATCAGCAGCAGCGATAAGGACGATTTGGACCCCCTGTCGCCCCCCAGAAACTCCTCTTCCTCCTCTAACCACATCCAAAAGAAGCTGCGTTTTGAAGACACTTTGGACTTTCTAGGACTCGATGTGAAGATGGCCGAGGAGTCTCCTTCTTCTTCCTGCTCATCCTCCTCTACTCCCCAGGCAGTGAGGAGTAAAAACCTGCTCATCTCCCCAGTGGGCGTTGGGCATCATGCCAATGGCCTCACAAAAGCCTCACCCGTGTCCAGTTTTGCCAACAGCAAGCCTGGCTCAGCCAAGAAGTTAGTCATC…
ENSXETG00000041173	card9	0.31446607286976247	NA	ATGGGAGAACCCATGTGCCTGATAGAAAACAAGGAAGGGGAAGAATTAACAGTTAACCAGGAGGCCTTAGAGATCTTACTGGAAATCACTCAGCCTGTGGTGGTTGTGGCGATTGTTGGGAAATATCGAACTGGGAAATCCTACCTTATGAACATACTAGCCGGAGCCAGGAATGAGCACTCAGGGTTTGCTCTGGGATCAACCGTCCGGTCAAAGACTAAAGGGATCTGGATGTGGTGCGTGCCTCACCCTACTAAAAAAGGCCACACCCTAGTTCTGTTGGACACAGAGGGACTGGGGGATGTAGAAAAGGGAGACAGCAAGAATGATGCCTGGATCTTCTCCCTGGCTATCTTACTCAGCAGCACTCTGGTGTACAACAGCATGGGGACCATTGAC…
ENSXETG00000020963	anapc5	0.12607587397419148	anaphase promoting complex subunit 5 [Source:Xenbase;Acc:XB-GENE-978471]	ATGGCAAGTGTTCACGAAAGCCTATACTTTAACCCCATGATGACTAACGGGGTAGTTCACGCCAATGTGTTCGGTATCAAGGACTGGGTGACACCATACAAGATCTCAGTGCTGGTGCTGCTGAGCGAGATGACCAAGGATACGAAAATTAGCTTGGTGGAGAAGAGGCGCTTAAACAAGCAAATCCTTCCCCTCTTGCAGGGACCAGATATGACTCTCTCAAAATTAATTAAGATTGTTGAAGAGTGCTGTCCACATGTAGCAAGCTCTGTCCAGATCAGAATAAAGTTGATGGCTGAAGGAGAACTGAAGGACATGGAGCTATTCTTTGATGATCTTGCAGATTCTTTCACAGGAACTGAACCTGAAGTGCATAAAACAAGTGTTGTTGGACTTTTC…
ENSXETG00000002956	ammecr1l	-0.01780677188547744	AMMECR1 like [Source:Xenbase;Acc:XB-GENE-5787907]	ATGGGGAAGAGGCGTTGCATATCAACCACAGAGAACAAGCCATCCTCTGGATGCTGTGGAGTAAAGAAACCTAAACTGTGTCCTCCTTCTGGCGGTATCCAGTCTTCTGTCACAAATAACTGCCAGCCTACTGAAGACAAGACAGTGGGGCCTGGTGCTCTCACTCAATTCTCCCGGCCCAATGGGACCACAAGTGGCAGGGAACAGTCTGTGGTGACAGCTGAAATGGGCTGCTACTGCTTTGATGTCCTCTACTGTCACCTACATGGCTTCCCACAGCCACGCCTACCACGTTTTACCAATGACCCTTATCCTTTGTTTGTTACGTGGAAGGCTGGACGCGACAAACGTCTTAGAGGCTGTATTGGGACCTTCTCTGCCATGAATCTTCACTCAGGA…
ENSXETG00000015765	otud7b	-0.12274854294638343	OTU deubiquitinase 7B [Source:Xenbase;Acc:XB-GENE-968436]	ATGATCCCATGGCCCCAGGACACGGACACCGTCCTGTCGGAATTTGTCCGCTCAACTGGGGTGGAGCCCGGACTGGCTAGAGATCTTTTAGAAGGTAAGAAATGGGATGTGGGTGCAGCACTCAATGACTATGACCAGCTGCGCCAAACCAGCGCCGGGGGACTGGGTCATTCCTTCAGTGAAGGACGCAACTTTAAACCGCCTGAGGTTGGACGCTCGGTGAGACCAATGCTACAGCGGCAGGATGATGTTGTACAAGAAAAGCGCTTATCTCGGGGGATCTCCCACGCCAGCTCCTCCATTGTTTCCCTGGCCCGCTCCCACGTCTCCAGCAACGGAAGCAGCGAGCATCCCCTGGAGACCCCCGTCTGCACCTTCCAGCTCCCTGACCTAACCGTG…
ENSXETG00000022904	crk	-0.19794441394954493	v-crk avian sarcoma virus CT10 oncogene homolog [Source:Xenbase;Acc:XB-GENE-996357]	ATGGCGGGCAACTTCGACTCCGAGGACCGGGCGAGCTGGTACTGGGGCAAGCTGAACAGACAAGAGGCGGTCAATCTTCTGCAGGGCCAGCGGCACGGTGTGTTTTTAGTTCGAGACTCCACAACTATACCTGGTGACTACGTATTGTCTGTCTCTGAGAACTCCAAGGTTTCCCACTATATCATCAACAGCGTCAGCAACAACCGGCAGAGTGGGACTGAACCGGCGCCGTCATCCCGATTCAGAATAGGTGACCAAGAGTTTGATTCCTTACCATCTCTTTTGGAATTTTATAAGATACATTACCTGGACACTACAACTTTAATAGAACCAGTTTCCAAGTCTAAACAATCTGGTGTAATCCAAAGACAAGAAGAAGTTGAATACGTGCGAGCTCTC…
ENSXETG00000027617	ralgapa2	0.27844361993618916	Ral GTPase activating protein, alpha subunit 2 (catalytic) [Source:NCBI gene;Acc:100145357]	ATGTTTTCCCGAAGAAGTCATGGAGACCTCAAGAAATCTACACAGAAAGTTCTGGACCCAAAGAAGGACGTACCCACCCGGCTGAAGCACCTGCGGGCTGTGCTGGATAATCAGGAGTCGAGTGAACTGAAGCAGTTTTTTGAAGCTCATTATTCTCACATTTATTTTATCTTCTATGAAAATTTCATTACACTGGAAAGTAGCTTAAAGCTAAAAGGGAATAAATCACAAAGGGAGGAGCTGGACTCTATTCTCTTTCTTTTTGAAAAAATTCTACAACTACTACCTGAAAGGATATTTTATCGCTGGCAGTATCACAGTATAGGTATGTCTATGAAGATTTTCATTCATCCAGGTCATGGTATATCTAGTATAAATAAATTTAAAATACGATGTGAA…
ENSXETG00000025366	XB5776174 [provisional:5430427o19rik]	-0.08518901395857437	provisional ortholog of RIKEN cDNA 5430427O19 [Source:Xenbase;Acc:XB-GENE-5776175]	ATGTTGGCCGAAGCCTTTATCAGTACAATTATGTATCAAGAAGCAAAAAAAGGACATGAATATAATAGGTCGCTGGTGGGTCACTTTGAAAATTCGTATGGGAGTCTATCAAAAAGAAGAACTTCAAAAGTGCCAAAGGCAAGTAGAGAGGTGCTGAACTTTGTACAAGACAATCATAATTTTAGGTCTGCTGAACAGCTCTCCCCACAGCTATATGGTGATCTTACTGGTGATGCTTCACAATCAATGAGTATTCCGGGGTCTGATCAGAGAAGTTCAAACCATCTGGACTTATATACCTCATGGTCAAGCATGTATGGAAGCATTTATAAAAACTACCCTGATCTGCACATTGGAGGAGACCATTTCCTCAACAAAATGGATTCAGGTTGTATTTTG…
ENSXETG00000034619	sh3bgrl	-0.04576436582786517	SH3 domain binding glutamate-rich protein like [Source:NCBI gene;Acc:101733396]	ATGGTCATTAGAGTTTATATCGCAACGTCTTCGGGCTCCACATCTATTAAGAAGAAACAGCAAGATGTCCTAGGGTTTTTACATGCCGTTAAAATTGAATTTGAGGAGAAAGACATTGCTGCCAATGAGGAGAATCGAAAGTGGATGAGAGAGAATATTCCTGAGCATTGCCGGCCAACAAGTGGCAACTCACTGCCTCCTCAGATCTTCAACGACAGCCAGTACTGTGGGGATTATGATGCCTTCTTTGAAGCACGAGAGAATAATGCAGTCTATGCCTTCCTTGGGTTGACAGCCCCACCTGGTTCAAAGGAAGCTGAGGCTCTGGCAAAGAAGAATGCAGAATCATCATAA
ENSXETG00000025510	rps19	0.35567393211855824	ribosomal protein S19 [Source:Xenbase;Acc:XB-GENE-968799]	ATGCCTGGTGTCACAGTGAAAGACGTTAACCAGCAGGAGTTTGTCAGGGCCCTGGCTGCTTTCCTGAAAAAGTCTGGGAAGCTGAAGGTACCAGAATGGGTGGATACTGTCAAGTTGGCGAAACACAAAGAACTGGCACCATGTGATGAAAACTGGTTCTACACCCGTGCTGCTTCCACAGTTCGTCATCTGTACCTCCGGGGTGGGGCTGGTGTTGGGTCCATGACAAAGATCTATGGAGGCCGACAGCGTAATGGCGTTATGCCCAGTCACTTCAGCAAAGGCTCAAAGAGCGTGGCCAGGAGAGTGCTACAGGCTCTAGAGAACCTTAAAATGGTGGAGAAAGACCCCAATGGTGGTCGCAAACTTACTCCCCAGGGACAGAGAGACTTGGACAGA…
ENSXETG00000025574	slc31a2	-0.23279117433536406	solute carrier family 31 member 2 [Source:Xenbase;Acc:XB-GENE-5805083]	ATGCAGATGTATTTTGTCTTTTCTGAAAATGTGACGTTGCTCTTCGATTTTTGGACAGTTCAGACACTGGCAGGTCTGATACTATCCTGCGTGGTTGTCCTACTTCTCACTGTTTTATATGAAGTATCCAAGGTCTGGAAGAGCAATCTACTCGGCCAAGCACTGCAGACCTTTCCTATAAGATCTACCCATGAACCTACTCCATCCTCAACCCCTGACCCTGAGGCCAGCTCAAGCATAGTCTGTGATCCCTTGCTGCCTTCAGCCTCCCTGTCCCACCAGCATGTGGAGAGACTGCCGCCAGTGATTGTGGAGCGCACCCAACCTAGTTCCAATTCCAGATGGTGGTTCCTGCATTCTTTTCTCTCCCTGCTGCACATGTCCCAGGTTGTACTTGGA…
ENSXETG00000023477	hdhd3	-0.4043665350235662	haloacid dehalogenase like hydrolase domain containing 3 [Source:Xenbase;Acc:XB-GENE-969463]	ATGAGCCTGCGGCTGATCACATGGGATATAAAAGATACCCTGCTGCGAGTCCGGGTGCCGGTGGGGCAGCAGTATTTTGCCGAAGCCAAGAGGCAAGGTCTCTGTATGGACCCCGGTTCCTTGGAGACATCGTTCCGTAACGCCTACCGGACTCAGAGCCGGCTCTTCCCCAACTACGGGTTGGCGCAGGGCATGGACTCCCGGCAGTGGTGGTTGGATGTGGTGTTGCAGACATTCCGACTCTCCGGCGCTGAGGATGATGAGACCGTCCGGTCCGTGGCCCAACAGCTCTACCAAGACTTTTCCACTGCCCGTAACTGGGCCGTGGTACCGGGAGCCAGGGAGGCGCTGGATTCCTGCAAGGGGCTGGGGCTCAAGATGGCGGTGATCTCTAACTTT…
ENSXETG00000018470	vill	0.2001530900005549	villin like [Source:Xenbase;Acc:XB-GENE-945607]	ATGACTCAGAATCTGGAAAACATCTGTCGGAAACCCGGCCTGCAGATATGGTCCATGGAGAAAATGAAAATGGTTCCCATTCCTGAGAAGGCCTACGGAAGCTTTTTCGAAGGCGACTGCTACATCCTCTTGTATAACAAACAGACCCCCAATGGCTTGATCAGTGATATTCACTACTGGATAGGGAAGGACTCCTCCCAGGATGAGCAGGGCTCGGCCGCCTTCTACGCCACACAGATCGACGGGCTCCTCGGGGGAGGCCCAATCCAGCACCGGGAAGTGCAAGGGCACGAGTCTGCCACCTTTAAAAGTTACTTCAAGAATGGCGTCATCTACAAGAAAGGAGGGGTGTCGTCGGGGTTCAAGCACGTAGAGACAAACATGTACAACATACGGCGC…
ENSXETG00000014979	cavin4	0.43952519896659714	caveolae associated protein 4 [Source:Xenbase;Acc:XB-GENE-877091]	ATGGATTTTGAAAGAAGTTCAGAGAAAGACAGGGTCAACTTGAATCGTTTATCCATGGTCTCAGAGGATTCAGAAGACCATGATGCAGCCTTGACTATTGTTACCGTTCTGGACAAAGTAGCCACTATTGTGGATACTGTGCAGGCAAGTCAAAAAAGGATTGAGGAGCGACACAGAGAAATGGAAGATGCGATCAAGACAATTCAAATTGAACTCTTGAAGCTTGCACAAGCTCACAGCAATACAAGTTACACAGTCAACAAGTTGCTTGAAAAAACCCGCAAAGTAAGCTCTAATGTAAAAGATGTGAAGTCTCGAGTTGATAAGCAGAGCGACCAGGTCCAAAAGGTGGAGTCCAAACAAGAGGAGATGCTGAGAAAAAATAAATTCCGAGTTGTT…
ENSXETG00000012228	coq5	0.27242355477791425	coenzyme Q5, methyltransferase [Source:Xenbase;Acc:XB-GENE-981147]	ATGGCAGCCCCCATGAGATGTATTTTGCGGGGTCGCCTGTGTTGGGTGAGGGGGATGTGGAGGTGCCAAAAAGCGGCTTATACAGAAGATGCCAGGAAGGAGACTCACTTTGGGTTCCAGACCGTGTCTGAGGAGGAAAAGGGAGAGAAAGTTTACAGAGTTTTTGAGAATGTTGCTCATAATTATGATATCATGAATGATGCTATGAGTCTGGGAGTGCACAGATTTTGGAAGGACTGGCTGTTGCAGCTTATGAAACCTACACCAGGGATGCAGCTACTGGATGTGGCTGGGGGAACAGGAGATATTGCATTTCGTTTTATTAATTATATTCGTGCTCAGAGAGAAAAGTGGATTCGCCAAGAGCTGAAATTGCAACAGGATCTTTCCTGGCCAGAC…
ENSXETG00000005019	tp73	-0.18541121194832616	tumor protein p73 [Source:Xenbase;Acc:XB-GENE-482857]	ATGTCCCAGTCTTCTGGAGCAGATGAAGGGACTACATTCGAGCACCTCTGGAGTACCCTAGAGCCAGACAGCACCTATTTTGAGCTTCCGCAATCAAGCCATTCAAACAACACTGAAGCATCAAATCGAACAGATGTCAACATGGATGTTTATCAAATGAGGACCATGAATGAATCTATCATGTCCCAGTTCAATCTGCTGAACAACACCATGGATCAGAGTATCGGCAGCAGAGCGGGCTCCACTAGTCCCTATAACCCTGACCATACCTCGAATGTTCCTACGCATTCCCCCTACTCCCAGGCCAGCTCCACGTTTGATGCCATGTCACCTGCCCCTGGCATCCCTTCCAATACAGACTACCCAGGAACGCACAACTTTGAGGTGACATTCCAGCAA…
ENSXETG00000003617	fancd2	0.1442712175209747	FA complementation group D2 [Source:Xenbase;Acc:XB-GENE-984801]	ATGGTGGCCAAAAGAAGGCTGTCTCGATCGGATGACAGGGAAGAGAGTTTTGCTGCAGACACTTCTAAAAACAAGAAGTGCCGTACAAGCAGTAAAAAGACAAAGGCCTTGCCCCAAGATGGCGTTGTGGAAAATGACAGCATATTTGTGCAACTGCTGAAGTCCTCAGGAATGACTCTAAAATCTGGAGACCGTCAAAATGAAATTGCTGTGGATCAGGCTGTTTTCCAAAAAAAGCTTCACCAGGCATTAAGAAAGCATCCCAGGCACCCAAATGTCATTCAGGAGTTCATCAGTGGATTAGAATCACACATTGAAGATCGTGATACATTCAGGAATTGCCTTCTTCCCTGTGGAAACAGACAAGAGACAGAAGCAAGTACCATGGTTGGTTCCTTC…
ENSXETG00000031487	emd	-0.1345823120308977	emerin [Source:NCBI gene;Acc:100127712]	ATGGAGAATTATAAACGCATGACCGACGATGAACTGATCGAAACCCTGCGGAAATGCAACATTACGCATGGACCTATTGTGGGCACCACTCGGACTTTATATGAGAAGAAACTTTATGAGTATGAACGCAGCAAAACTAGGAATCAGTATCCCTTAGGTTCGTATGAAAGCAAAACCCAGTACAGGAACAGAGCAAATGACGAGGACCTGGAGGATGAGGATTTTTACGAAGAGAAAACTGTTACCAGAACCTACCACTATCCACAAGCGCGACCACGGACCTTTGATCGGCTTGAACGAGAACCGCTCTATAAAGAAAACACGTACCAGCCCATATCCCAGATGCGCCACCTGGGGACCACTCAAAGGGTAGAGCCTCGCAGGCCAATCCGTGTGAAG…
ENSXETG00000014203	sec31b	0.07029120647358064	SEC31 homolog B, COPII coat complex component [Source:Xenbase;Acc:XB-GENE-5956591]	ATGAAACTGAAAGAAATTGAACGATCTGCTGTTCAAGTCTGGAGCCCGGCCAGCCAACACCCGGTTTACTTAGCAACAGGAACATCAGCACAACAGCTTGATGCCTCCTTCAACACCAGTGCTGCCCTGGAAATTTTTGAGGTGGACTTTGGCGACCCTCACCCCGATATGAAAAAAAGAGGTGTCTATCCAGTGTCTAACAGGTTCCATAAGATACTTTGGGGCAGCTTTGGAAGTGGCCTGCTGGATTCATCTGGAATCATTATTGGGGGAGGAGATAATGGAGTCATAACTTTGTATAGCGCTTCTAAGATCCTTGCATCAGAAGAGGAGCCAGTTATTACAAAGAATGACAAACATTCTGGTCCTGTTAGGGCTCTTGATTTAAACCCATTTCAG…
ENSXETG00000012226	rnf10	0.05196936487420309	ring finger protein 10 [Source:Xenbase;Acc:XB-GENE-854662]	ATGCCGCTGAGCTCCCAACTTTCCCCAGCAGATATGGATCCTGGATCAGCCAACGCAAACAAGAACCAGAACCGCTCGGGCTCTGCGGGACCTTCCGGGGAGTCTAAGCCGAAAAGTGAACCAAAAAATGGCAATAGCTCCAAGCAACGATATAATCGGAAACGAGAAAATTCTTACCCTAAAAATGAGACTTTCGCTGGTCAGTCCCGGCGCTCCTGTCCACAGAAAAGCAAAACTTTTAACAAGGTTCCACCACAAAGAGGTGGACCTAAGCAGTATGGAATGGGAAGGAGGGAAGAGGTAGCAGAGACTCAGAGGGCAGAGTTTAGTTCAGCTCAATATTCTGGGCCAAAGAAGATCAACCTTAACCATCTTCTAAACTTTACCTTTGAGCCACGT…
ENSXETG00000009647	avil	0.4636022204027588	advillin [Source:Xenbase;Acc:XB-GENE-489888]	ATGGCCAAACATCATCCCCCCCTAGCTTCATGCAAAGACCCAGGAGAGTCATATTGCACCAAATCTTTGATAAAAATGCTGGTGCCAAAGAAAGCCGAAGGGAATTTCTATGAAGGTGACTGCTACCTCTTGCTTCATACAAAGAAATCTGGCAGTTCCCTATTTTATGATATCCACTACTGGATTGGAAAGGAATCTTCCAAGGATGAGCAGAGCTCAGTGGCCATATACACTGTACAGCTGGATGACTACCTTGGAGGTAGCCCCGTGCAGCACCGGGAGGTTCAAGGCTATGAGTCTGACTGCTTTAGAGGTTACTTCAAACAAGGCATTATTTACAAAAAAGGGGGTGTTGCATCTGGAATGAAACATGTGGAAACCAATACGTATGATGTGAAG…
ENSXETG00000012202	ptger2	-0.037813571375854865	prostaglandin E receptor 2 [Source:Xenbase;Acc:XB-GENE-967341]	ATGAGGGGCAACTCGAGTGACTTGTGTGAGTCCCAGTTACACCTAAACCCTGGGGTGAGTCCAACCCACAGCGCTATGATGTTCTCTCTCGGGGTACTGGGCAACCTCATCGCTTTGGTGCTGCTGGAACATCGCAGGAGGGGGATCAGGGGGAAGATCTCTCTCTTCCACATCCTGGCCACTGGGCTGGTCATCACTGACCTGATGGGGACCTGCATGCTTAGCCCTGTAGTTTTGTCAGCTTACTCCAGCAACCTGACCCTCAAAGCTTTGGGGGGCAGTGATAATTTCATTGTCTGCCACTATTTTGCCTTTGCCATGACTTTCTTCAGCCTGGCTACTATGCTGGTCCTATTCGCCATGGCATTGGAGAGGGCAATGGCCATTGGGCACCCTTAC…
ENSXETG00000014257	mgc75872	0.10299195436516725	uncharacterized protein mgc75872 [Source:Xenbase;Acc:XB-GENE-5919586]	ATGTTCCACAGAAAGCACCTCAAGCTTCTTCTCATTGGGAATGCAGGATCAGGAAAGTCAGCACTGATGAACCAGTATGTCAACTGTCGCTTTACCAACTACTACCGAGCCACTATCGGTGCAGATTTCTTCACCAAGGAGCTACGAGTTAATGATAAGGTGGTGACAGTGCAGATATGGGATACAGCAGGCACAGAGCGCTTTCAGTCACTGGGTGCCGCTCTCTATAGAGGCACAGACTGCTGCCTGTTGGTTTTTGATGTGACCTCCCCTAACTCCTTCCATGCTCTGGATAACTGGCACAGAGAGTTTCTGGTGCAAGCGGATCCAGTTTCTCCTGGCAGTTTCCCTTTCGTGGTGATCGGTAACAAGACAGACCTTGAGGAGCGGCAGGTTTCA…
ENSXETG00000012094	mthfd2	0.5861901475143916	methylenetetrahydrofolate dehydrogenase (NADP+ dependent) 2, methenyltetrahydrofolate cyclohydrolase [Source:Xenbase;Acc:XB-GENE-941965]	ATGAAAAGGTCTTTTTATGTTTGGTCTGTAGTTACTGTATTGCTGAAATCAGTCCAGGCATTATGTATTCCTCTATCATGCAGGAACGAGGCAGTCGTCATCTCTGGAAGGAAGCTGGCAAGGCAAATTCGGCAAGAGGCACGGCACGAAGTGGAACAGTGGGTAGCAGCTGGGAACAAGAGACCGCACCTCAGTGTTGTTCTGGTTGGAGACAACCCTGCTAGCCATTCTTATGTGTTAAACAAGACAAAAGCCGCTGCAGATGTGGGCATCAGCAGTGAAACCATACTCAAGCCAACATCCATCACAGAAGAGGAGCTGTTGGATCTCATCAACAAGCTTAACAATGATGATCATGTCGATGGGCTCCTTGTGCAGCTGCCTCTCCCAGAACACTTA…
ENSXETG00000015112	cadm4	0.06016988162746148	cell adhesion molecule 4 [Source:Xenbase;Acc:XB-GENE-992659]	ATGGCTCCGGCACTGGCTCCGGCACTGGCTCTCCTACAGCAACGCTTTGTCCTGGGGATCGTACTGCTGGCCACTGCGGGAACAGTCGTCTCCCAGGAGGTACAAGCCGAGAATGTCACCGTGGTCGAGGGTGGCACCGCAGAGATCAGCTGCCACCTGCACCAATACGACGGCTCCATCGTGGTTATCCAGAACCCTGTTCGGCAAACGCTGTTCTTCAATGGAACTCGAGCTCTGAAGGACACAAGGTTTCAGCTGGTGGAGTTCACCCAGAAAGTGGTGAAGATCCATCTGTCGGATGCCAAGTTGGAGGATGAGGGTGGATACTTCTGCCAGCTCTACACCGAGGATACACATCATCAGATCGCCACCCTCACAGTTATAGTTCCCCCGGATAAT…
ENSXETG00000015458	man2a2	0.2439709856999782	mannosidase, alpha, class 2A, member 2 [Source:Xenbase;Acc:XB-GENE-981388]	ATGAAACTGAAGAAGCAGGTGACTGTTTGTGGAGCAGCCATCTTTTGTGTGGCTGTCTTCTCCTTGTATCTCATGCTGGACAAAGTGCAACACGACCCACCCAGGAGACAGAACGGTGGCAACTTTCCCAGGAGCCAGATATCTGTCCTACAGAATCGTATAGAGCAGCTTGAGCAGCTCCTAGAGGAAAACCACGAAATCATCAGCCACATCAAGGACTCTGTTCTAGAACTGACAGCCAATGCTGAGGGCCAGCCCATTCTGCTCCCATACCACACTCCTAATGGAACTTGGGTCATGCCACCTGACCCCAGACCTAGCTTCTACTCTGTATCTCCTCAGGACTGTCAGTTTTCTGTGGCAAATAAACGGCAAAAGACAGATTTGCAGATGCTTGAT…
ENSXETG00000001873	xa-1	-0.1417661648204826	anterior and ectodermic-specific protein [Source:Xenbase;Acc:XB-GENE-5720787]	ATGCTCTGCTACGTTCTGCTGCTTGCCCTAGTGGCCCCGGGCTGGAGCCACCCCCCAGGGAAGCCAGGCGGAGATTCTGCATCCTTTGTGCCTCCTCCTCCTCCACCTGTCAGCCATGACCTGATCAAGGGATGGGAACACCCTGAGGAGTTCAGGACTGGAGCACCCTTACCAACAAAAAATCTACCCAATGAATCTGAGAATGGCAGGCATAAGAGTGACCTTCATCATGAAAAAGCTGCCCCCACTGGAGTCCCTCATCATACAGGAGAAGTCCCACGTCCCACAGGAGAAGTCCCACATCATACAGGAGAAGTCCCACGTCACACAGGAGAAGTCCCACATCATACAGGAGAAGTCCCACGTCACACAGGAGAAGTCCCACATCATACAGGAGAA…
ENSXETG00000015753	vps45	0.18666821095501404	vacuolar protein sorting 45 homolog [Source:Xenbase;Acc:XB-GENE-961682]	ATGAATGTGGTACTGGCAGTCAAGCAGTATGTGTCCAAGATGATAGAGGACAGTGGGCCTGGCATGAAGGTGCTGCTCATGGACAAGGAGACGACCAGCGTGGTGAGCATGGTGTACACACAGTCTGAGATCCTGCAGAAGGAAGTCTATCTATTCGAACGTATAGATTCCACCAACCGAGAGAGCATGAAGCACCTGAAAGCCATATGTTTCCTGAGGCCCACTAAGGAAAATGTGGAATATTTGATCAAGGAGCTGCGCAGGCCCAAATACAGCGTCTATTTCCTCTACTTCAGCAATGTGATCAGCAAAAGCGATGTGAAGTCCCTGGCAGAGGCAGATGAGCAGGAAGTAGTGGCTGAGGTTCAGGAATTCTATGGAGACTATATTGCTGTAAAC…
ENSXETG00000031793	POP5	-0.4015660007091662	POP5 homolog, ribonuclease P/MRP subunit [Source:NCBI gene;Acc:779510]	ATGCGGTTCAAATGTCGGTACTTGCTGTGTGAGCTGGTGCTGGAGGATCCTCGTTGGAGACAGAACATCTCCCAGGGGACAGTTGTGTATAACGTAAGGGAAGCGATAGCACGAACTCATGGGGATTTCGGAGCCGCAGCTTGCGCTGTATCCTTGTCAGTTAAATACCTCAATGTGTACACTGGAGTTCTTCTTCTTAGGTGTCGTAAGGATTTTTACCAGCTCCTGTGGTCCTCTCTTCCTTTTATTACTAGCTTGGATAATAGAGGCCAGCGCATTCCATGTTTCATAAACACATTACATGTTGGGGGTACAATACGCACTTGTCAGAAATTCCTTATTCAATACAACAAAAATCAGCTGCTACAGTTAATGAAGAATTGCACCAATGCAGCGGAG…
ENSXETG00000033305	clstn1	-0.14988626345690487	NA	ATGGCACACAGGCCTGGCTGTGTTGCGAAAGATACTTTGGTCTCTATAATTTACCTTTGTTTTCTCCCAGATAAAGCTGGCGTTTGCCCGGACACAAATCTGTCTCTTGGAATATGTGGCAAAGAATGTAAAACAGACACAGACTGTGACAGTAATCTCAAATGCTGCAAGACGGGATGCGATGTCTTCTTCTGCAGTTCTGCCGCAACATATCATCCAAACACGTTTATTTTTCTTTTAGAGAAACCAGGAAGTTGTCCCAAACCTTCAAATCAGACGTCCTGTGAAACAACTGCTGACTGCAAATCTGACAGCAAATGCGAAGGACACTTAAAATGCTGCCCTACAGGCTGTGGAGGTTATGCCTGCCATCTCCCAATAGGTAATTCATTTGTAGAC…
ENSXETG00000014954	lcp1	0.5329271120618218	lymphocyte cytosolic protein 1 (L-plastin) [Source:Xenbase;Acc:XB-GENE-962206]	ATGGGGGATCAGATAGGTAATGTAAAAGTATCAGGCAAATACTTTTATGGCAAAAATATAAGTAGCATGCAAAGACAGTGTTATAATAGATATGCTGATGGAAATGGTTTCATAAGCCTCAATGAACTGAATGACTTGTTTAAAGCTGCTAATTTGCCTCTCCCTGGCTATAGACTGCGGGAAATCATCCAGGACTTTATGGAAACAGGTGATTCAAACAAGGACGGGAAGATTAGTTTCGATGAATTTACCACAGTTTTTCATAACCTTAAAAGTTCTGATGTTGCCAAGACATTTAGAAAGGCTATAAACAAGAAAGAAGGAATTTGTGCCATTGGTGGTACCTCGGAACAGTCAAGTGCTGGCACTCAACATTCTTACTCGGAGGAGGAAAACTAT…
ENSXETG00000034436	NA	-0.2600836107866004	NA	ATGGAATATTTATATAAACCTGATAACTATAATATATGCATTATATTGTTTTCAAAACAGTGTTGTTCTGTGTTTCAGAAACATGCCAAAGGACAGGATTTGTTTGACCAGATTGTATATCATTTGGACCTAGTGGAAACTGACTATTTTGGCCTGCAGTATATGGATGCTGCACAAATATCGGTATGTGTTTTCCATCTCAATTTCACTATAGGAATCTTTTATATTTGTATTCTATCGGTAATGATTATTGCATGTATCAAGTAA
ENSXETG00000034192	cabp1	0.09160393969032396	calcium binding protein 1 [Source:NCBI gene;Acc:100135743]	ATGCCTCGTTGGCTCTTGTTCTCTAACCCTCTTCCTTCGGGAAAGCTTGTCCTCTGCTCCTCGCTTTGGGTTATGGGAAATTGTGTGAAGTCTCCTCTTCAAAACCTCTCAAAGAAGATGCACCAGGAGGAACGACTCAGCCTCAGACCAACGCAGTCAGGGGAGGAGGGGGCACAGGGACCACTAATGCTTTTGGCTCAAAACTGCGCAGTGATGCACAACCTGCTTGGCCCAGCCTGTATCTTTCTCCGCAAGGGATTCGCTGAAAATCGTCAGCCTGACAGAGAGCTACGCCCAGAAGAAATAGAAGAGCTCAAAGAAGCCTTTAAGGAGTTTGACAAAGATAAAGATGGCTACATCAGCTGCAAGGACTTGGGGGACTGTATGAGGACCATGGGA…
ENSXETG00000034576	NA	-0.027258776544875657	NA	ATGTGCTTGGTTTACTTGGAAGGGTTGAACTTGATGGACTCTGGTCTTTTTTTAAACCCTATGGAGCCCCCTGACAGGGAAAAACGGCACAAGGAAGGGCCCCTGATAGAGTTGTCACTCTTCACTCCATCAGTAGCTGAGACAAAGCTGCTTAATCTGGGAACCTTGAGGAGGAAGAAGAGGCGGGTTCGTCGTTCTCATGGACCTCGCCTTATGCGTGTGGGCTGTTCCCTGGGGACTTGCCAAGTACAGATCCTTAATCACCGACTTTGGCAGTTGATGGGACAATCGGGAAAAGAGGATTCACCAATTGAACTCAGCAACCCACACAGTTATGGCTGA
ENSXETG00000021129	bmper	-0.04398433728366094	BMP binding endothelial regulator [Source:Xenbase;Acc:XB-GENE-480927]	ATGCACAGCTGCCCCTTCACTGGCAAGTGCCTGCTGCCAATGTGCCTCACCTTTCCTGGAATTTCCATCACATTTACTGGCTGGATTCTTGTGCTCTCTACTGTGGTTCGAATGTCTCTGGCATCCTCATTCTTGACAGCAGCCTCTGGATGCAATAGGACCATGCACAGCTGCCCCTCCACTGGCAAGTGCCTGCTGCCAATGAGTCTCACCTTTTCTGAAATTCCCATCACATTTATTGGCTGGATTCTTGTGCTCTCTACTGTGGTTCGAATGTCTCTGGCATCCTCATTTTTGACAGGATCTATTGCCAAATGTGAAAATGAGGGAGAAGCCCTACAGATTCCATTTATCACTGATAACCCCTGTATCTCCTGTGTTTGCCTGAACAAAGAAGTC…
ENSXETG00000039229	mapkbp1	0.1313646998212011	uncharacterized LOC100486588 [Source:NCBI gene;Acc:100486588]	ATGGAAAAAACAGACGATGATCCGCTTCAAGAGACACAGTTTTGGTGCAATATCTGCAGAATTACCTGTGCATCTGCACTTAATCTTCAAAGCCATTTTATGGGTTTCAAGCACAGGCAGGTAGAAGAATCCCTTAAAAACAATGGCGCTGAAAAACCTGTTTTAAAAAGAAAGAAACGTCAGTTTTTGGATGATCCAGAGCCTGCAGTAGCTGGACAAACACTGGATGACTTACTTAGAGCTTGCAAAGAAACTGAGCCTGCATTGGGTCTTGAATATGTGTATGAATATCATCAAGATGAAAGTAGTTATCGTGCATATGAGTGCAGATTATGCAACCTTCAGACAGGACTGGCTCACATGTTTATGCATGTTGTTGGAGCCAAACATAGAATTGCA…
ENSXETG00000032769	anapc1	0.49022370004624194	leucine zipper-EF-hand containing transmembrane protein 1 [Source:NCBI gene;Acc:780254]	ATGGCCGCCTTGCTCGTACGAGGCTGTGCGCTGAGACCCTCCTGGGCAACGAGATCGGCTCCTATCTGTGCCCGGGGAGAAGGCATGAAGGGTAATTTTGCTGAGTCTGTCTGCTTAGGATGCACCTCACTTCGTTTATTAAATTACAGAAATGCTTGTTTTAGAAGTTGCACTGCTGCCCGTCCAGTTTATGTTGCCTCAAGGAAAGGGGACAATGAATTTCTATGGACTGACATATCGGAAAGAAGGTACTATAAGTACCTCAGTTCTCCAGCTTCATGGACAGCACTCAAAATGGGACCATGGGACCTATCAGTCCGAAATTTGCACTTGTCACGACCACTTTTTGACGACTCTGTGGTAGAAAAATCACTGAAGTCATTAAAGGACAAAAATAAA…
ENSXETG00000002767	josd2	-0.26592882705353843	Josephin domain containing 2 [Source:Xenbase;Acc:XB-GENE-5740260]	ATGACCGAGTCGGTGTTCCATGAGCGGCAGCGGCTGGAGCTGTGCGCTGTCCATGCCCTCAATAACCTTCTGCAGAAACCGGAGTTCAGTCACCAGAGGGCTGAGGAGATCTGCCGGGGACTCGCTCCAAACTCTATGATTAACCCTCACCGCAGTCTTCTGGGTACCGGCAATTACGATGTCAACGTCATTATGGCAGCTCTTCAAACTATGGACTATGCAGCGGTTTGGTGGGACAAACGGAGATCCCTGGAGAGTCTGGTTCTAAGTGAGATCTTTGGCTTCATCCTTAATATTCCATCTCCTGTTTCTCTGGGATTCCTCTCCCTGCCCATCACACGCAAACACTGGATCGCTGTGCGACAGATCGAAGGTGTTTACTACAACTTGGACTCCAAG…
ENSXETG00000023474	alad	-0.12064920148591213	aminolevulinate dehydratase [Source:Xenbase;Acc:XB-GENE-962175]	ATGCAAGTCAGCTCCATCCTACACAGCGGGTATTTCCACCCTGTTCTGCGGGCCTGGCAGTGCTCTGCTACCAGCCTCGATGCCAACAACCTCATGTACCCCATCTTCATCACGGATAACCCGGATGCCATAGAGGAGATTCCCAGCCTGCCCGGCCAAGCCAGGTACGGGGTGAACCAACTGGAGGGGTTGCTGCGCCCCCTAGTGGACAATGGGCTGAAGTGCGTGCTGATCTTCGGGGTCCCAAGCAAAGTCATTAAGGACGAGCGGGGCTCCGCGGCAGACACGCCCGACACGCCGGCCATATTGGCCATACAGAGGATTCGGGAGAAGTTCCCCCAGCTGCTCATTGCCTGTGACGTGTGCCTTTGTCCCTATACCTCCCACGGCCACTGCGGA…
ENSXETG00000021836	rgs6	-0.01168535721867539	regulator of G-protein signaling 6 [Source:Xenbase;Acc:XB-GENE-954519]	ATGATAGAAGATATTATCACACGGATGCAAGATGATAAAGCTGGTGGAGTACCAATCCGAACAGTCAAAAGCTTCCTGTCGAAAATTCCCAGTGTGGTGACAGGTGCCGATATTGTACAGTGGCTGGTTAAGAATCTCAACATCGAAGACCCAGCGGAAGCAATACATTTAGGAAGCCTTATAGCAGCCCAGGGTTATATCTTCCCCATATCAGATCATGTTCTCACACTGAAGGATGATGGCACCTTTTATCGTTTTCAGGCTCCTTATTTTTGGCCTTCTAACTGCTGGGAACCAGAAAACACAGACTATGCTATATATCTATGCAAACGAACCATGCAGAACAAGGCAAGGCTGGAGCTCGCCGATTATGAAGCCGAAAACCTAGCAAGACTTCAA…
ENSXETG00000016210	abcb11.2	0.6291244559534233	ATP binding cassette subfamily B member 11, gene 2 [Source:Xenbase;Acc:XB-GENE-988819]	ATGGCTTATAGATATTACACTGTAATCACAACATCAGAAGGGAGGACATACAGTACTGTTGCATGTGTTTACAACTTTCTGCTCCAGTTGCACAATCAAAGAGAATATGGAGCCAGATTTCAACATGCTTTTATGTTTAGGACCCATTTAAAACCCAAGGTTATTATCCTTTGTTTATATAGTTTTAGATTTGCCACTTGCTCTGAGACCACCATGATGTTGTTCGGAAGTCTGGCTGCCATTATTCATGGAGCTGCACAGCCTTGCATGTTGCTGGTCTTTGGCCTCATGATTGACACCTTTATAGAATATGATATTGAGATGCAGGAGCTGCGGGACCCTAACAAGACCTGCACAAACAACACTATTACATGGACCAATGGCTCTTTAGTGCCAGAT…
ENSXETG00000022900	grpel1	0.38968638923980947	GrpE-like 1, mitochondrial [Source:Xenbase;Acc:XB-GENE-973857]	ATGGCAGCCAGGGGAGTGAGACTCTTCAGGCAGAGCTTTGGCGCAGTACTGCGGTCGGCACAGACACCGGTCCGAACATGCCCCCGGCTGATGTGCACAGCAACAAAAGAGCAAAACAATCCCACCCAGGACGAGGATAAGAGTAAGAACCAGACTGAGGAAAGTCCTGATCAGGCTGCCACAGAAAAGGCCAAACTAGAAGATCAGATCAAAGACCTCACTGACAAATATAAGCGGGCTTTAGCAGACACAGAAAACTTGAGGCAAAGGAGTAAGAAATTAGTGGATGAAGCTAAATTATATGGTATCCAGGGCTTCTGCAAGGACCTGCTGGAGGTTGCTGATATCTTGGAGAAAGCAACAGAAAGTGTTCCAAAAGCAGAGATCAAGGCTGAAAAT…
ENSXETG00000014251	hcfc1	0.7414829263818228	host cell factor C1 [Source:Xenbase;Acc:XB-GENE-6076923]	ATGGCGGCGACCCCGGCCATATCGACAGCCGGTGCCTTGCAGCCCCGCTGGAAGAGAGTAGTGGGATGGTCGGGCCCGGTGCCTAGGCCCAGGCATGGACACAGAGCTGTGGCTATAAAGGAACTTATCGTGGTTTTTGGAGGAGGGAACGAGGGCATCGTGGATGAGCTTCATGTTTATAATACGTCAACAAACCAGTGGTTTATTCCAGCGGTGAGAGGTGACATACCCCCTGGATGTGCCGCCTATGGATTTGTTTGTGATGGGACACGTTTACTCGTTTTTGGAGGAATGGTGGAGTATGGAAAGTACAGCAATGACTTGTATGAGTTGCAGGCAAGCAGATGGGAATGGAAAAGACTAAAAGCCAAAGCACCCAAAAATGGCCCACCACCATGC…
ENSXETG00000002768	dtd1	0.030697874701808153	pentraxin fusion protein [Source:NCBI gene;Acc:100494227]	ATGGCCATTGCAATTATTGGCGCGCTCCTTTTTATTATCAGTACTGGGCTCTGTGCCACAGAAGGTAATCAAGGTCTTCAAGGAAAATCTCTGAGCTTTGAAAAGCAAACATATTCTAATTATGCCATCTTACATCCTAAAAAGCCTCTAAACCTGGATGCCTTCACCCTTTGCCTCCGGGTATCTGCTGAGCCCCCAGGAAACCGTGACATGATTCTGTTCTCCTACTTTGGCAACGGAGCTGATCAACTGAATCTCTGGAGAGAGCATGATGGCCGTTTCTCATTATACCTTGCAAGCAGTAAAGAAGGTGTTTTCTTCTCTCTACCCCAGATCAGCACATTTGGTACCCAACTCTGCGTAACCTGGGAATCCTCATCTGGTACCACTGCCTTCTGG…
ENSXETG00000034716	NA	0.04450555226447958	protein XA-1 [Source:NCBI gene;Acc:101733477]	ATGTCGGCTTGGACTGCCTCTTCATACAAAGCAAAGTTGCTTCTCTTATTTGAAGAGCGACAGAAGGGATTTCCAGCTATGCTCTGCTACGTTCTGCTGCTTGCCCTAGTAGCCCCGGGCTGGAGCCACCCCCCAGGGAGGCCAGCCTTTATGCCTCCTCCTCCTCCACCTAGCTATGACCTGATCAAGCCATGGGGACACCCTGAGGAGTTCAGGACTGGAGCACCCTTACCAACAAAAAATCTACCCAATGAACCTGAGCATGGCATACATAAGAGTGACCTTCATCATGGAAAAGCTGCCCCCACCGGAGTCCCACATCATACAGGAGAAGCCCCACATCATACAGGAGAAGTTCCACATCATACAGGAAAAGTCCAACATCATACAGAGGTCCCA…
ENSXETG00000026506	iah1	0.2052562795758642	iisoamyl acetate hydrolyzing esterase 1 (putative) [Source:Xenbase;Acc:XB-GENE-962803]	ATGATTGCCTGGCCTCGCCTTGTGCTTTTTGGAGACTCAATAACTCAGTTTGCATTTGAAGCCAACGCATGGGGATCAGTGATTGCTAATAAACTTATAAGAAAGTGTGATGTCATCAATAGGGGTCTTTCTGGCTATAACACGAGATGGGCTAAGCTCCTCCTACCAAGACTCATCCCTGACGCTGCTGAGAAACCCGTCGCTATTACTATATTCTTTGGGGCCAATGACAGTGCTTTAAAAGAAGAAAATCCCCAGCAACATGTCCCCCTGGAGGAATACACTGAGAATTTAAAGTGCATGATCCAGTACCTGAAGAGCATAAATGTCCCACAGGATAGGATCATACTGATCACTCCCCCGCCAATATGTGAGCCAGCCTGGGAACAGCAGTGTCTG…
ENSXETG00000039269	klhl32	0.7471205910117393	NA	ATGGGAAAGACCAAAGAGCTGTCCAAGGATGTCAGAGACAAAATTGTAGACCTGCACAAGGCTGGAATGGGCTACAAAACCATTAGCAAGAAGCTGGGAGAGAAGGTGACAACTGTTGGTGCGATTGTTCGAAAATGGAAGGAGCATAAAATGACCATCAATCGACCTCGCTCTGGGGCTCCACGCAAGATCTCACCTCGTGGGGTGTCAATGATTCTGAGAAAGGTGAAAAAGCATCCTAGAACTACACGGGAGGAGTTAGTTAATGACCTCAAATTAGCAGGGACCACAGTCACCAAGAAAACCATTGGAAACACATTACACCGCAATGGATTAAAATCCTGCAGGGCTCGCAAGGTCCCCCTGCTCAAGAAGGCACATGTGCAGGCCCGTCTGAAG…
ENSXETG00000023087	miox	0.09556827525030318	myo-inositol oxygenase [Source:Xenbase;Acc:XB-GENE-488415]	ATGAAGTTTGAGTCCTGTAAGAGACCCTGCCTAAACTTGTGTCTGTCACAGGATGGACCTCTACTGGACAGAGTGAGAAAGACATACACCTTGATGCACACGTACCAGACCGTACAGTTTGTGAAAGAAAAGCATGTACAATGGGGTTCATGCACTCACAGGAAAATGAGTGTGATGGACGCACTTAGTTTGCTGGATAATTTGGTTGATGAATCTGATCCTGATGTGGATTTTCCAAACTCTTTCCATGCATATCAAACAGCAGAGGGCATCCGTCGCATTCATCCAGATAAAGACTGGTTTCAGCTGGTTGGTTTGCTTCATGATGTTGGAAAAATTATGGCCCTGGATAATGAACCTCAGTGGTCAGTGGTCGGAGACACCTTCCCAGTGGGATGC…
ENSXETG00000034897	ngb	-0.06721007873977106	neuroglobin [Source:NCBI gene;Acc:594898]	ATGGAGAAAGATCAGCTGTCGGGACCCCAAAAAGAACTGATTCGTGAGAGCTGGCAAACAGTAAGCCAGGACCAGCTGCACCATGGAACAGTACTATTTTCCAGGCTATTTGAATTGGAACCAGAGCTGGTCTTCCTTTTTCAGTACAACTCCTCTCATTTTTCTAAAGTGCAGGATTGCTTGAGCTCAGCTGAATTCACAGAACATATCCGTAAAGTTATGACAGTGATTGATGCTGCCGTCAGCAGTCTGGACTGCCTGTCTTCCCTAGATGAATATCTGACCAGCCTTGGGAGAAAGCACAGAGCTGTAGGAGTGAAATTGGAATCCTTTAATACGGTGGGGGAATCCCTTCTCTTCGCTCTGGAGTCCTGTTTAGGAGATGCTTTTACTTCTGAT…
ENSXETG00000035451	faxc	-0.4278394153697292	WD repeat domain 86 [Source:NCBI gene;Acc:100486668]	ATGAGTCCAACCCTAACTGAAACTGCCCATGCCGGGCTCCGGAGGATGGGGAGCACTGGCTCCACTTGTGGCACATCCAGTTCTTTAGTAAAGGTCTGCACGGATCACAAGGGAGGCATTAATTGGATGAGTCTGAGCCCGGATGGGTGCCACCTGCTGACTGCCAGCGAGGACTGTACTGCCCGGCTCTGGAGGACATCAGACAACCAGTGCTGCAATGTGCTGCTTGGGCACAGCAGTTATATCACCTTTTGTCACCTGGAGAATGAGGCGGCGTTCACATGCAGCGCGGATCAAACGGTGAGAAAGTGGGAGGTGTCCTCTGGCGAGTGTGTGATGGTTTATACGGGACACACCTCCATTGTGAACAGGATCTTGGTGGCCAAGGGCTACATCTTC…
ENSXETG00000037331	NA	0.7078819078411518	NA	ATGGGAAAGACCAAAGAGCTGTCCAAGGATGTCAGAGACAAAATTGTAGACCTGCACAAGGCTGGAATGGGCTACAAAACCATTAGCAAGAAGCTGGGAGAGAAGGTGACAACTGTTGGTGCGATTGTTCGAAAATGGAAGGAGCACAAAATGACCATCAATCGACCTCGCTCTGGGGCTCCACGCAAGATCTCACCTCATGGGGTGTCAATGATTCTGAGAAAGGTGAAAAAGCATCCTAGAACTACACGGGAGGAGTTAGTTAATGACCTCAAATTAGCAGGGACCACAGTCACCAAGAAAACCATTGGAAACACATTACACCGCAATGGATTAAAATCCTGCAGGGCTCGCAAGGTCCCCCTGCTCAAGAAGGCACATGTGCAGGCCCGTCTGAAG…
ENSXETG00000022903	tada2b	-0.03966881197040775	transcriptional adaptor 2B [Source:Xenbase;Acc:XB-GENE-991340]	ATGGCGGACCTGAGCAAGAAGTACTGCGTCTACTGCTTAGCTGATGTGACCAGCCTGCGTCTGCGTTGTACCGAGTGTCAGGACATCGAGCTATGCACAGACTGCTTCTCAGCGGGGGCAGAGATCGGCAATCACCGCCGGTGGCACGGATACCAGCTGGTAGACGGCGGCCGATTCACACTATGGGGGCCCGAAGCAGAGGGAGGCTGGACCAGCAGGGAAGAGCAGCTGCTGCTCGATGCAATCGAACAATTTGGATTCGGAAACTGGGAGGATATGGCTGCACACGTGGGAGCTTCCAGAACACCAACAGAAGTAATGGAACACTACGTCACCATGTATATTCATGGCAACCTTGGGAAAGCGTGCATTCCAGACAGTATCCCCAACAGAGTAACT…
ENSXETG00000025212	crp	0.05167759118084589	C-reactive protein, pentraxin-related [Source:Xenbase;Acc:XB-GENE-5780408]	ATGGCCATTGCAATTATTGGCGCGCTCCTTTTTATTATCAGTACTGGGCTCTGTGCCACAGAAGGTAATCAAGATCTTCAAGGAAAATCTCTGAGCTTCGAAAAGCAAACATTTTCTAATTATGCCATCTTACATCCTAAAAAGCCTCTAAACCTGGATGCCTTCACCCTTTGCCTCCGGGTATCTGCTGAGCCCCCAGGAAACCGTGACATGATTCTGTTCTCCTACTTTGGCAAAGGAGCTGATCAACTGAATCTTTGGAGAGAGCGTGATGGCCGTTTCTCATTATACCTTGCAAGCAGTGTAGAAGGTGTTTTCTTCTCTCTACCCCAGATCAGCACATTTGGTACCCAACTCTGTGTAACCTGGGAATCTTCATCTGGTACCACTGCCTTCTGG…
ENSXETG00000013669	gnl3	0.1590938388226887	guanine nucleotide binding protein-like 3 (nucleolar) [Source:Xenbase;Acc:XB-GENE-6456133]	ATGGGTCGTGATTCTCTGTTGCAGGAAGAGGAACTGAAGCAGAACCGGAAACTGGAGCGACAGAAGGAAGTGGCGAAGAGACGCAAGTTGGACGAGAAGAAAAAGAAAAACTCTGAGAAAAGAGAAAAAAGGGATAATAAGAAGAACAAAGGGACAAAGGCGGCCGAGAGTGCGGAGGTGGTTTCCTGCCGTCACGTGAACAAGGTACTGGAACAGTCTGATGTTGTACTGGAAGTTCTGGACGCCAGGGACCCTTTGGGCAGTCGATGTGCCCAAGCTGAGGAGGCGGTGCTTAAATCTCCCAACAAGCGGCTTCTGCTGCTCCTCAATAAAGCCGATCTTGTACCCAGGGACGTTCTAGAGAAATGGCTGCAGGTTCTGACTGCGGAGCTTCCCACC…
ENSXETG00000037152	mob1a	0.5307511963571194	MOB kinase activator 1A [Source:NCBI gene;Acc:549780]	ATGAGCTTCCTCTTCAGCAGTCGATCCTCAAAAACCTTTAAACCAAAGAAGAACATCCCAGAGGGGTCGCACCAGTACGAGCTGCTGAAGCATGCGGAGGCTACGCTCGGGAGCGGCAACCTTAGGCAAGCGGTAATGCTGCCCGAGGGGGAGGATCTCAATGAGTGGATTGCAGTTAATACTGTGGATTTCTTCAATCAGATTAACATGCTATACGGGACAATAACTGAATTCTGCACTGAATCCACGTGCTCGGTCATGTCAGCCGGACCCAGATATGAATACCACTGGGCAGATGGCACCAATATAAAGAAACCCATCAAGTGTTCCGCTCCAAAATATATTGATTACTTGATGACCTGGGTTCAAGACCAACTTGATGATGAGACTCTTTTTCCT…
ENSXETG00000035917	ccdc127	0.2964321403966844	coiled-coil domain containing 127 [Source:NCBI gene;Acc:549322]	ATGAATAACTTAAATGATCCACCACAATGGAATATCCATCCAAATGAAGACGGAAGGGAAGGAAGTAAATGGAATTATGCTCTGTTGGTTCCCATGCTTGGACTGGCTGCTTTTCGTTGGATCTGGTCAAAGGAATCAGAGAAAGAAATTTCAGAAACAAAATCAGAGTGCAGCAAGAAACTGGAAAGTGCTCAGAAAGATCTTGAAGCAAAATATCGAGATACTATCACAGAAAGCCGTCGTACAATTGCTCACTTGGAAATTGAGCTAGAAAAGGAGAAAAATAGAACTCTCAGTTATCGTAGGGCCATCATTTCCCAGGGGCAGAAACTTGTAGAGGAAAGGAAACAACTTGAGCAAGAGCGAGAGGAGCTTTTTCTCGAAAAACAAGCTGTTCAG…
ENSXETG00000012198	nid2	0.37532562319283347	nidogen 2 [Source:Xenbase;Acc:XB-GENE-967329]	ATGTGGGACAGAACTCTGCATCTGCTCCTGCCCTTGCACTGCCTGCTGGCCTTCTCTGCTGCTATATCCCGGCATGAACTCTTCCCCTATGGGGAACTGAGGGGAGATGTGCTCCTGCAGGAGGGGGACGATGAGACTTCTGAGGTGGTGAAACTCTCCCAACCGCTGCTCTTCTATGAAGCCCAATTCAGCAATTTATATGTAGGGACCAATGGAATTATTTCCACTCAGGACTTCCCCAGAGAAACTCAGTATGTGGATGATGGCTTCCCTACAGACTTCCCTGTCATTGCTCCATTCCTCTCAGATATAGATACCAGCAATGGCAAAGGAAAGATTTTTTATCGGCAGGACAATTCTGAACAAGTTCTCAATCGGGCAGTCAGTGAGATCCAGAGG…
ENSXETG00000037177	ccdc96	0.3889343507586813	coiled-coil domain containing 96 [Source:NCBI gene;Acc:100489589]	ATGGAGCTTGAGCCAACAGGGAGCAGCGATCCTGCTCTGCCCGACTCTGTGCAGGAGGAAAGGGATGCAGACACTGGAGTGAGAGAAAATGAAGTCAGTGAGCCAACCAGAGGGGAAGAACATGGAAAAGAGTCAGAGACTGGTGATGATAATAGAAGGAGTGCTGGCATTAAAGATGAAGCAGAAATTGGAGATGATAATGGAAGGAGTGCTGGCATTAAAGATGAAGCAGAGACTGGAGATGATAATGGAAGGAGTGCTGGCATTAAAGATGAAGCAGAGATTGGAGATGATAATGGAAGGGTTGCTGACATTGAGGATGAAGCAGAGTTAGCACACAGTGGAGAGGAAGGCCCCTCGGAGATGGTTGACTTGCCAGCAGAAGGCAGCGTGTTGGAA…
ENSXETG00000002769	ptx	0.5265157269936394	pentraxin [Source:Xenbase;Acc:XB-GENE-5878543]	ATGGCATCTTCCATATTTTTTATACTCTTGTATTTAGCTAGTATTTGTGCACAGCACAACGGAGTTGATGCTTGGAGCCCTCCTAAAGATGGAATATATGTTCAGCCAGCCCCTAACGTGGCACTTGGTGGAATAACATCACAGTCCAGTACCATGGCCTACTATGGAAACCCACGAAATGCCAATGATGGTTCTCTGGCCAACAACTACCTGAGATCTCAGTGCTCCTACACAAAAAAAGAAACAGACCCTTGGTGGATGGTGGACTTACAAAAACCATATCAGATTTTATCTGTGGCTGTTACTAACAGAGTGCTGGAATGCTGCAAAGAAAGGCTTTTTGGTGCTGAAATCCACATTGGAAATAACCCTGAGCAAGGCGGAAAATTAAACCCCAGA…
ENSXETG00000002303	kat2a	0.21972604694738437	K(lysine) acetyltransferase 2A [Source:Xenbase;Acc:XB-GENE-992487]	ATGGCGGAACTTGTGCAGGCCTCGCAGTCCCGTACTAGCTTGCAGGCTCCGGCTGCTGGGCACACTGCTACCGGGACGGGCGGAGGGAGCAGCTCCAGCACTAGCGACCCGGCCAGGCCCGGCCTCAGCCAGCAGCAGCGAGCCAGTCAGAGGAAGGCACAAGTCCGCGCCCTCCCTAGGGCCAAGAAGCTGGAAAAGCTCGGTGATTCTCCGCTTGTAAGGTACAGGGAACGCACGCCGCCCCCTAGGGGCAAGGGGACTGCTTCTGTCTGCTTTCTTGCAGCCAACCATGTGTCTCACCTGGAGAACGTTTCTGAAGATGAAATCAACCGGCTGCTGGGTATGGTGGTGGACGTAGAAAATCTCTTCATGTCCGTTCACAAAGAGGAAGACACAGAC…
ENSXETG00000009726	crygn	0.04842951964922068	crystallin gamma N [Source:Xenbase;Acc:XB-GENE-949640]	ATGTCTCAGTATTCAGGAAAGATCATTTTCTACGAAGGAAAATGTTTCACAGGGAGGAAGCTGGAGGTGTTCGGAGACTGCGATAACTTCCAGGACAAGGGCTTCATGAACCGAGTGAACTCCATCCGAGTGGAGACTGGCGCCTGGATCTGCTACGACCACCCCGACTTCAAAGGGCAACAGTACATCCTGGAGCGGGGGGAGTACCCAGATTTCCACAGGTGGAATGGGCACAATGACCACATGGGATCCTGCAAGCCTGTTAGAATGCACGGGGAGCGCTACCGGCTGGAGCTGTTCGAGGGGTGCAATTTCACTGGCCAGTGCATGGAGTTCTGTGAGGACTGTCCCTTCCTGCAGGGGCGGGGCTGGAACAAAAACTGCGTAAATGCCTGTAAA…
ENSXETG00000020962	camkk2	0.1745219358928584	calcium/calmodulin-dependent protein kinase kinase 2, beta [Source:Xenbase;Acc:XB-GENE-990544]	ATGTCATCATGCGTGTCCAAGAGGGCTTCTTCTGAGAGGTCCATCCTACAAGATGATCATGAGACTACAATTCAACCTCACATAGTCTGTAACTTTTCAACCCTGAGCATTGACCTAGGCATGGAATCAGTTATAGTGGTAACAGAATATGATTCAGGTATCACTGACATAGAGTCTGAGCAGAATGGGCAGTCCAGGCATCAAGATGTTGAATTCAAGGAGAACAGTGAAGTGGAAACTGACTTGCACAGAATAAATGAAAGTGAATGCAAGCTTGATGACCGTAAAGTGCTTCCAGTAGGCCGTAAAGATTGCAAAGGCAAACTCAACATGACCAATAGAAAACTCTCCCTTCAAGAACGATCTCAGTCTACCCCAGCTTCTAGTAATAGCCTAGGA…
ENSXETG00000025286	bola3	0.14686872737445364	bolA family member 3 [Source:Xenbase;Acc:XB-GENE-982605]	ATGTACGCAGCTAGGAATGTATTCGCTACAAGCAGGACATGTATCCGCTGTATCACAAACAGATCCTTCGCTTCCAAGACAGAGGGAGAGTACAAGATAACTCAGGTGCTGAAAGCCAAGTTTCCGCTGGCCTCATATGTTAGAGTAGTTGATATTTCAGGTGGCTGTGGAGCAATGTATGAAATCCACATAGAATCTGAAGAATTTAAAGACAAACGTACAGTGCAGCAGCATAAGATGGTGAATGAGGCACTGCAAGAGGAGATTAAAGCCATGCATGGACTGAGAATATTTACCACCGCTCCCAAACACTGA
ENSXETG00000022893	ywhae	0.25342501382055216	tyrosine 3-monooxygenase/tryptophan 5-monooxygenase activation protein epsilon [Source:Xenbase;Acc:XB-GENE-996375]	ATGGAAGAGCGAGAGGATCTAGTGTACCGAGCCAAGCTGGCAGAGCAAGCCGAGAGATATGACGAAATGGTGGAATCTATGAAGAAAGTTGCAGGAATGGATGTGGAGTTGACAGTAGAAGAAAGAAACTTGCTCTCTGTTGCATATAAGAATGTGATTGGAGCTAGAAGAGCGTCATGGAGAATAATCAGCAGCATTGAACAGAAAGAGGAGAACAAAGGGGGAGAAGATAAACTCAAAATGATAAGGGAATATCGGCAAATGGTTGAGGCTGAGTTGAAATCTATCTGTAATGACATTCTGGATGTACTGGACAAGCACCTCATTCCAGCTGCAAACAGTGGAGAATCCAAGGTTTTTTACTATAAAATGAAAGGTGACTATCACCGATATCTGGCA…
ENSXETG00000018464	pskh1	-0.19090652114758128	protein serine kinase H1 [Source:Xenbase;Acc:XB-GENE-947381]	ATGGGTTGTGGGACAAGCAAAGTTCTCCCTGAACCTTCAAAAAACCTCCAGCAGGACTTGGTGAAAAAAGTGGAACCTTGTTTGGACAGAAAAAGTGACCAATATAATAATTGTATTACAGACAAAAGCCAGACATTTCTAAAGGATGATTACCTATCTCACTCACTGCCTAATGGAGACTTGAAGTGTCATGTGGAAAGTGCACATTTAAGGAGACACAAAATTGCTAAGTACAGGGCCAAGTTTGACCCACGTGTAACTGCAAAATATGATATAAAAGCTCTTATTGGACGAGGTAGTTTTAGTCGTGTTGTAAGAGTAGAACATAAGGCCTCTAAACAGCCATATGCTATTAAAATGATTGAAACTAAATGCAGGGAAGGAAGGGAGGTATGTGAA…
ENSXETG00000015750	plekho1	-0.001010702318278739	pleckstrin homology domain containing O1 [Source:Xenbase;Acc:XB-GENE-1006512]	ATGAAGAAGAACCTTTCTGCAAAGAGGGGACCTTTAGATGGGAACCATGCCCCCTGCCAGCCAGAAAAAGTGGGATGGATTCGGAAATACTGCGGGAAGGGCATCTTCAGGGAGATCTGGAAGAACCGTTACGTGGCTATACGGGGGGATCAGCTCTACATATCGGAGAAAGAGGTGAAAGATGAAAAAAATGGGCATGAAGTCTTTGATCTGAGCGACTACGAGAAATGCGAGGAACTGCGGAAATCACGAAGTCGGTCAAAAAAGAACCACAGCAGGTTCTCCCTTGTACGCTCCAAACAGCCAGGGAACACTGCACCGAACCTGATCTTTCTCGCAGTCAGCCCTGAGGAGAAGGAATCTTGGATCAATGCCCTGAACTCTGCAATCACACGAGCC…
ENSXETG00000002770	wbp11	0.3778820003832839	WW domain binding protein 11 [Source:Xenbase;Acc:XB-GENE-966604]	ATGGGGCGGCGATCCACTTCATCCACCAAGAGTGGGAAATTCATGAATCCCACAGATCAAGCCCGGAAGGAAGCAAGGAAGAGGGAGCTGAAAAAAAACAAGAAGCAAAGGATGATGGTTCGAGCAGCTGTTTTAAAAATGAAAGACCCAAAGCAGATAATCCGGGATATGGAGAAACTTGATGAGATGGAGTTTAATCCTGTTCAGCAGCCCCAGCTTAATGAAAAAGTCCTGAAAGATAAACGTAAAAAACTCAGAGAGACATTTGAACGAATTCTCCGTTTGTATGAGAAGGAAAACCCTGAAACGTACAAGGAGCTGCGCAAAATTGAACTTGATTATGAGCACAAACGATCTCAACTCAGCCAGTATTTTGATGCTGTCAAGAATGCTCAGCAC…
ENSXETG00000012243	unc119b	-0.1702644861950628	unc-119 lipid binding chaperone B [Source:Xenbase;Acc:XB-GENE-981104]	ATGAGCGGGTCTAACCGGGAGGCGGCTGTAGCTGGGCAGCCCAAAGACGAGCGAAAGAAATCGGGAGGCGGAGTGATAAACCGACTAAAGGCTCGGCGCGTACAGGGAAAGGAATCTGGAGCCTCAGACCAAAGCTCCGTAACACCGTTTAGAGAAGAGGAGCTCTTGGGCTTGAACGACCTGAGACCGGAGCATGTTCTGGGCCTGAGTCGGGTTACTGAGAATTACTTGTGCAAACCTGAAGATAACATCTATGGTATTGATTTTACTCGCTTCAAAATTAGAGACCTGGAGACTGGCACTGTGCTCTTTGAGATTTCTAAACCTTGCTCAGAACAGGAAGAGGAGGAGGAGAGCACTCAGCTAGATGCAAGTGCTGGGCGGTTTGTTCGTTATCAG…
ENSXETG00000010002	XB987369 [provisional:prss12]	-0.0046062705251041225	provisional ortholog of serine protease 12 [Source:Xenbase;Acc:XB-GENE-987370]	ATGAAACATGAAGACATTCAGAGGGTGCTGGTCATTTTCCTGGGTGTTTTCTCTGGCTGTGGAATCTCTCAGGATTTTGCAAATTCCATGCATGGCCCAATAAACCAGCAGTCTACAGGGTACAGCCTCTGCTCAGATGGCATAGATTCTCTAGGCTATTACAATGGCACAATATCAGTAACAGAGACTGGCTCAGAGTGCTTACATTGGAAGGAGTTCCCTGATTATATCCAGCAGTACCCTGGGCGAGGTCTAGGGGACCACAATCACTGCAGGAATCCTGATGGCGGAGTTGTACCATGGTGCTTTTACCGGAAAAGTTCAGGAGTAATCAGCTGGGCTCACTGTGACTGCAGCCAAGGTGCTGTTCGGCTAGTGGGTGATTTGTCATTTAATCAA…
ENSXETG00000031515	pomt2	0.17181553080109238	protein-O-mannosyltransferase 2 [Source:NCBI gene;Acc:100490100]	ATGCCGCAGTCTGGGCTGGCTGAGCAGAGTTCGGCTTTGGGAAAGAATGAAGCAAATAGAAGAGAAAAAAGAAGGAAAATGCAGCGGGCGAGCATTGAGCTCCGGAACACAGTGCAACGGGCCCGGAACAGTTGGAATGCAGCACTGCTTGTAGCACTTTTATCCTTCTTTACTCGATTCTACCGCTTGTCCGAACCGCCTCATGTGTGCTGGGATGAGACCCATTTTGGAAAGATGGGAAGTTATTACATAAACCGGACCTTTTTCTTTGATGTTCATCCTCCTCTTGGAAAGATGCTTATTGGACTTGCTGGTTACTTGAGTGGTTACAATGGTTCCTTTCCCTTCCAGAGGCCAGGACAGAGCTATGAGACTCATAATTACTTGGGCATGAGAGGG…
ENSXETG00000033680	PCMTD1	0.16130486739445385	protein-L-isoaspartate (D-aspartate) O-methyltransferase domain containing 1 [Source:HGNC Symbol;Acc:HGNC:30483]	ATGGGTGGAGCAGTGAGCGCTGGTGAAGACAATGATGATCTAATCGACAATCTTAAAGAAGCCCAATATATACGAACTGAAAGGGTGGAACAGGCCTTTAGAGCAATTGATCGCGGAGAATATTATTTGGAGGGATACAGGGACAATGCTTATAAAGATTTGGCTTGGAAGCATGGTAACATACACTTATCAGCACCGTGCATCTATTCTGAAGTTATGGAAGCACTTAAGCTTCAGCCGGGATTGTCTTTTCTCAATCTGGGAAGTGGAACTGGATATTTAAGTACAATGGTGGGCTTAATATTAGGCCCATTTGGTATAAACCATGGAATTGAGCTTCATCCAGACGTGGTGGAATACGCTAAGGAAAAATTGGAGTGTTTCATTAAACAGAGTGAT…
ENSXETG00000000110	eya4	0.17290453451058366	EYA transcriptional coactivator and phosphatase 4 [Source:Xenbase;Acc:XB-GENE-485487]	ATGGACGACTCCCAGGACCTGAATGAGCAACCAGTAAAGAAACCGTGCACAGAATCAGATGTTACAGAGCCTCAGAACACCAGGTCTATGGAAATGCAGGACTTAGCAAGTCCACACAATCGTGTTAGTAGTGGAGATACATCTGGAGCCTCCAAACTGGATAAGGCTAATATTAACAGCACCTCCATTACAACAAATGGGACAGGAGGGGAGAACATGACTGTTCTAAATACCGCTGACTGGCTGCTTAGCTGCGGCACACCCTCTGCTGCTACAATGTCTCTTCTTGCAGTCAAAACAGAGCCCATGAACAACAGTGAAACAGCTACAACAACAGGAGATGGATCACTTGACACTTTCACTGGGTCAGTAATAACAAGCAGTGGCTACAGTCCAAGA…
ENSXETG00000009724	rheb	0.18154865670786133	Ras homolog, mTORC1 binding [Source:Xenbase;Acc:XB-GENE-492096]	ATGCCGCAACCCAAATCACGTAAAATCGCCATCCTGGGGTACCGCTCCGTGGGAAAATCTTCATTGACCATTCAGTTTGTTGAAGGGCAATTTGTTGACTCGTATGACCCAACTATAGAGAATACATTTACTAAGCAAATTTCTGTGAATGGACAAGAATATCAGCTTCAGTTGGTAGATACTGCTGGACAGGATGAGTTTTCCATAATTCCTCAGACATACTCCATAGATATTAATGGATACATTCTTGTATATTCAGTCACATCAATTAAAAGTTTCGAGGTGATTAAAGTTATCCATGAGAAGTTGTTGGATATGGTGGGAAAAGTTCAAGTACCCATTATGTTGGTTGGAAACAAAAAAGACTTGCATATGGAAAGGGTGATAAGCTATGAAGAA…
ENSXETG00000018462	nkd1	-0.3544106212025992	naked cuticle homolog 1 [Source:Xenbase;Acc:XB-GENE-480911]	ATGGGGAAACTTTACTCGAAACACGCTGCAGTTTGCAAACCCAGAGAAAGTCCTGAAGGTGATAGCTTTGCAGTAAATGCCTGCTTAGCACGGAAAGGCATTGAGGACTGGATTGCAAAACAGAAGTCACCATCTAACTCCAATGTCAAGACCGGGTGCAGAATCACCCAGAGGGATTCATCAGGTGAAATTTGTAAAGATAACATTGCAAATGAGCATTTTCATCTGGAAGTTGCTCTGCCAGAAGAGAAGAGCGAGGGTCTATTTACCAGCGATGACAGGAAAGCAGATAAAGATACAGATGGACGTGTTAAAAAGCAGCTCAAATTTGAAGAATTGCAGTGTGATGTATCTGTTGAAGAAGATAATAGGCAAGAATGGACCTTCACATTGTATGAT…
ENSXETG00000015745	anp32e	0.12088658944602323	acidic nuclear phosphoprotein 32 family member E [Source:Xenbase;Acc:XB-GENE-991616]	ATGGAGATGAAGAAGCGCATCAGCTTGGAGTTGAGGAACAGGAATCCTTCCGAGGTGGCCGAATTGGTGTTAGACAATTGTCGGTCCGTCGATGGAGAGATTGAAGGCTTGAATGACACCTACAAAGAGCTGGAGTTCCTCAGCATGGCCAACGTAGAGTTGAAATCATTGTCAAAGCTTCCAAAGTTACCTAAGCTCAGAAAACTGGAGCTCAGTGACAACAGTATCTCTGGAGGGCTGGACGTGTTGACTGAAAGGTGTCCCAACATTACTTACCTCAACCTGAGTGGTAACAAGATTAAAGACCTGAGCACAGTGGAATCGCTTGCCAACTTAAAAAATTTAAAGAGCTTGGACCTGTTTAACTGTGAGATCACAAACCTAGAAGATTACAGAGAA…
ENSXETG00000023089	lmf2	0.32608840951896	lipase maturation factor 2 [Source:Xenbase;Acc:XB-GENE-974438]	ATGGGGGAGCAACGTTTGGCACGGTCCTCCTTTTTATGGGGGCTGAGTGGAATCTACCTGGTTGCGTTCGTATCTCTCTATGCACAGATTCCAGGTCTGTATGGACGTGAAGGCATCCTTCCTGCATGGAAGATGATGCGGTTTACTGGTAAAGGGTTTTGGGAGCAGTTGAAAGATTCTCCCTCATTGCTCTGGTTTGGCCCTCGCCTAGGACTGGATACAGAGATGACCATGGAACTGATCTGCTTGCTTGGGGCCCTTCTGTCTCTGGGAGCACTGCTTTTTAGTTTCTTACGGGACAGTCTGGTCTTTCTGCTGCTCTGGATATTCTACCTCTCCTTGTATCAGGTTGGACAAGTCTTTCTTTACTTCCAGTGGGACAGCCTGCTCCTAGAGACT…
ENSXETG00000023408	sdha	0.4673596820389081	succinate dehydrogenase complex subunit A, flavoprotein (Fp) [Source:Xenbase;Acc:XB-GENE-956942]	ATGAATGCACTGAGCTTGCGCAGACCTGCGTTTGGTACCGGAATGCGGAATCGAAATCTCTTCACGCATGTCCTTTATGGCATAGGGAACATGGCGTTTCTAAACGTTGCATCGTCGCGGCTTCTCAGCAAAACACTGCAGTTAGGCGGTAGAGTACAGAATTGCACTGCAACTTGTACAGCAGCAACACGTAACTTTCACTTCTCAGTATATGGAAGAAAGGACACTTCAGCAAAACTTTCTGATTCGATCTCAACACAGTATCCTGTAGTTGATCATGACTTTGATGCAGTTGTTGTTGGTGCTGGTGGTGCTGGATTACGGGCTGCGTTTGGATTGTCTGAAGCTGGCTTCAATACAGCTTGCATAACTAAGCTATTTCCTACCAGATCTCACACT…
ENSXETG00000040978	NA	0.00801554375270705	bifunctional protein GlmU [Source:NCBI gene;Acc:100496329]	ATGATTGCCTTCCTATGTATTGGAATGTTATTGATTGGATCTGGAGCTAATGCATTTATTCAGGGAGGCCCGAGCCCACTTTCAGCCTATGCCCTGCGGCTGGGACCCGGAGAAGAAATACTCACGTCATTGTTTAAATTCGTGCAAGAGAAGAACCTAAAATCTCCATTTGTTTTGACTTGTGTGGGCAGTGTCACCAAAGCAACCCTCCGACTAGCTAATTCCGACGCTCTGAATACCAATGAGATCATTTATTTAAAAGAAAAGCTGGAGATAGTTTCCTTGGTGGGAACACTGAATGAAGGAGCACACCTGCACATATCGCTTGGTGACAAGGATGGAAAGACCATTGGTGGCCATGCCATAGGAGATCTGGAGGTCTTCACCACAGCTGAAATA…
ENSXETG00000002957	sap130	0.34931252453166195	Sin3A associated protein 130kDa [Source:Xenbase;Acc:XB-GENE-6083596]	ATGAGTTCTCAACAGTTTCCCCGCCAGGCAACATCCATGTCAATTCCCCAAGTTTCTAACAGTGGAGCAACCATGGGGCAGAATCCCCAAGGACAAGGAGATGAGATAATACGAGACATGGATGTCCAATCCCGTGATTCAATTGGTGCTGGCACAGTTCTACCATCACGCGACGATAAGCAGGAACCTGTGGTTGTCAGACCTTACCCTCAAGTTCAGATGTTGGCTTCACACCATCCATTGCAACCTGCTCCTTCCCTCAGTATGACTGCACAACCTGCTCACCTAACCTCAGCTGTTCCATTGTCATTCTCTGAGAATATCCTGAAGCAGACTTCAAAGTCTACTATGCCTAGCCGGCCTATTGCTCCAGCACCTCCCTCTGCACTGTCTGCTGTA…
ENSXETG00000012090	tet3	0.2862844528022582	tet methylcytosine dioxygenase 3 [Source:Xenbase;Acc:XB-GENE-877084]	ATGGATACTCAGCCCGCGCCAGTTCCACATGTGCTGCCCCAAGATGTATATGAATTTCCTGATGACCAAGAGTCCCTTGGGAGATTAAGAGTCTCAGAGATGCCAGCGGAGCTGAATGGTGGTGGTGGTGGTGGCAGTGCAGCTGCCTTTGCCATGGAACTTCCAGAGCAATCTAATAAAAAAAGGAAGCGTTGTGGGGTCTGTTTATGTAATGTTTATAACTGTTCTGAAAGCATTTTAGTTGATGGACCCAAAACAGACCAAATGGAAGCAGGGCCAGTTAACCATGTTCAAGAAGGAAGGTTAAAGCAGGAATGTGACTCTACCCTCCCAAGTAAGGGATGTGAGGATCTAGCAAACCAATTATTAATGGAAGCAAATTCGTGGCTAAGCAATACA…
ENSXETG00000009427	aga	0.3526151634030914	aspartylglucosaminidase [Source:Xenbase;Acc:XB-GENE-1001622]	ATGGAGGGGGCGCCGTGTATCTGCCTTGTACTTTTCCTATTGAAGCTGTTAGCCAGCGTTGTGGAGATTAAAGCTGAGCTGCCTCTGGTTATCAATACCTGGCCTTTTCGAAATGCGACCGAAGCAGCATGGAGGGTGCTGGAAGCAGGCGGTTCTGTTTTGGATGCTGTTGAGAAGGGATGCGCACAGTGTGAAATTGATCAGTGTGATGGCAGTGTTGGATACGGTGGCAGCCCGGATGAAAATGGAGAAACAACTTTAGATGCCATGATTATGAATGGTAACACAATGGAAATTGGAGCTGTTGCTCAACTGAGAAGAATTAAAAATGCCATTGGTGTGGCCAGAGCAGTTATGGAGCATACCAAACACACATTTTTAGTTGGAGAATCTGCATCA…
ENSXETG00000037114	NA	-0.3354336299394975	NA	ATGAGGAACGAACGGGAGGCTACTCCGGCTGTGCTGAGGGGCAACCGAGAAAACAGGAGCTGTGACACCCAAAGCAGGGAGCTGGAACCTGGAAACGCACCCATCAACGGCCTACGGCACAGGGAAGAGAGAAAAGCCGCACTAAGCAAGGTTGTAATACGACGCCTTCCACCCAACTTAAATAAAGAACAATTGGAGGAGCAGCTACATCCTCTTCCAGCACATGATTATTTTGAGTTTTGTACTGCAGATCCCAGCTTGTTCCCCCATCTCTTTTCAAGAGCCTATATTAATTTCCGAAATCCAGAAGACATCCTTCTATTTAGAGACCGATTTGATGGATATATATTTATTGACAACAAAGGCCAGGAATACCCTGCAGTGGTTGAATTTGCTCCT…
ENSXETG00000004529	tnfaip6	-0.04778502512156249	TNF alpha induced protein 6 [Source:Xenbase;Acc:XB-GENE-988687]	ATGAAAACTGTGATATTCTTAGTTTTGGTGTTCTTGGAAGAAACCTTTGGATGGGGATTTAAGAACGGAGTCCTCCACAATTCTATATGGTTGGAACAAGCAGCTGGAGTCTATCACAGGGAATCACGGAATGGAAAGTATAAACTTACCTATCGGGAGGCCAAAGCTGTGTGTGAATATGAGGGGGGGCGCCTGGCTACGTACGAGCAACTGGAAGCAGCGAGACAAATAGGTTTCCACGTATGCGCCGCCGGGTGGTTGCACAAAGGAAGAGTCGGCTATCCCATAGTAAAGCCTACATTTAACTGTGGGTTCGGAAAGAAAGGCATCATAGATTATGGATTTCGGCTAAACAAAAGTGAACGATGGGACACCTACTGCTACAATCCCCACTCAAAA…
ENSXETG00000015735	nfib	-0.273455773718352	NA	ATGATGTTCAACAAAACCCTGGTGACACGGTTCATTCTTCTGGGTCTCTCTGACCTCTGGTCTTTATACTTTGTGATCTTCTTGGCCATTTATACAATCACACTCGCTGGAAACCTTCTTCTAATGATTGTGGTTAGAAGTGACAGCCGACTGCACACTCCTATGTACTTTTTCCTTACTAACCTCTCGTTCATTGACACTTGCCTATCCTCCACCATACTGCCCAAGATCCTTGCTAATACGTTATCCCAGGACAGGAGCATTTTGTTCTTGGGATGTGTGGCCCAGATGTTCTTTTCCTTAGTTCTTGGGGCGACAGAATGCATGCTATTAGCGGTTATGGCCTATGATAGATATGTGGCCATCTGCTTCCCTTTGCGCTATTCTACGATAATGAGC…
ENSXETG00000041122	NA	0.7144825597262676	NA	ATGGGAAAGACCAAAGAGCTGTCCAAGGATGTCAGAGACAAAATTGTAGACCTGCACAAGGCTGGAATGGGCTACAAAACCATTAGCAAGAAGCTGGGAGAGAAGGTGACAACTGTTGGTGCGATTGTTCGAAAATGGAAGGAGCACAAAATGACCATCAATCGACCTCGCTCTGGGACTCCACGCAAGATCTCACCTCGTGGGGTGTCAATGATTCTGAGAAAGGTGAAAAAGCATCCTAGAACTACACGGGAGGAGTTAGTTAATGACCTCAAATTAGCAGGGACCACAGTCACCAAGAAAACCATTGGAAACACATTACACCGCAATGGATTAAAATCCTGCAGGGCTCGCAAGGTCCCCCTGCTCAGGAAGGCACATGTGCAGGCCCGTCTGAAG…
ENSXETG00000026596	XB5799768	-0.3163659660754978	uncharacterized XB5799768 [Source:Xenbase;Acc:XB-GENE-5799769]	ATGGCTTCCCTGCTACAGGATATACTGTATGAAGTCCAGGGCCAAGCCCCTGCTCCCAACAAAGACTTCCACCATCTCATCATCACAAAAACTCAGGTAATACTAAGATCCTGGAAGATTTCTGTCCGTGCTGAGCACAGAAAAGTTTTGCCACGAGAAGTAAAAAAAACGCACAGTGAATTCTTGGAGGACAGTGGCTTTCAAAAGCAGGTACAAAGGATCTTTGGCAAGGACACAGTGGAATATGTGCTCAGTATGTGCAGGGGAAACTGTGATTTCATAGTCCGACTCCCAGATGATCTCAAGATTCGTATTTTGTCTTTTCTTGACACAAATGACATCAAAAATACATCAGAAACATGCAGAGCTTTTCAGAAGTTGTGCAGCACTGAGGAGTTT…
ENSXETG00000009344	kank2	0.16504632327391403	KN motif and ankyrin repeat domains 2 [Source:Xenbase;Acc:XB-GENE-997067]	ATGATGGCGCAAGTTCTACATATGGAGGCCCACTTCCCAGGGAAGCCGGGTCCTCCCTCTCTCTCTTCTATGAAAGACCCAGAAGCAGCCTATTCGGTGGAGACGCCCTACGGTTACCGCTTGGATTTGGATTTCCTCAAATACGTTGACGACATAGAAAAGGGCCACACTATAAAACGAGTGCCAGTGCACCGCCGGCCCCGCTATGGATCCCTGCCCCGAGGCCCTGGATACACAGGCTCATGGTGGACCTCTACGGAATCCCTCTGCTCCAATGCTAGCAACGACAGCCGCCATTCTTCCTACTCCTACTGTGGCAGAGGCTTCTACCCAGCCTACGAGAGCAGAGGTGGGGCCCAGGCACCCCATAACTTTAATCCAAGGGTGGAGAAGACGCTG…
ENSXETG00000041196	NA	-0.09406067629799353	olfactory receptor 2G6 [Source:NCBI gene;Acc:100492797]	ATGGAAAACTCAAATGAAACATCTTTCAACCGATTCTTTCTCCTCAGTCTTGCTGATACCCCATACCTAAAGGCCTTCAGCGTCCTAATTTTTCTCATTATGTATCTACTGACATTATCAGTAAACTCTCTGCTCATTATCGTGGTGAGAATCAATTTGCGGCTTCACACCCCGATGTATTTCTTCTTAAGCAACCTGTCCGTCATTGACATTGGCATAAGCACCTCAATAGTCCCTAAACTTATCATAATTACAATAACTCAGGATACAAGTATTTCACGTCTTGATTGTGCTTCACAGATGTTCTTCCATTCTGCCCTAGGAGCAACAGAGTGTATAATCTTGGCCGTTATGGCCTATGACAGGTATGTAGCGATCTGTAAGCCTCTGCACTACAAT…
ENSXETG00000018600	mrpl40	0.052038612839270554	mitochondrial ribosomal protein L40 [Source:Xenbase;Acc:XB-GENE-998670]	ATGAGGCTAGCAACTACCTTGAGGTTACAGAAGGCCTACAGCGATTTAATAATCCCGGGGCTAAGTTATCAGCAGGACATGAACTCGGCTGCGTGTGGTACGCTGTTACATGTGTGCAGGCAAGGCAGCAAGAGCTGTCCCCCTTGGATATGGAGACGAGAGAGTCACTGGCAAACATCTCTGCTGACCCTACGCTCAACCATACCAATGAGAGCAGAGCCTAGGAAGAAGAAAAAAGTGGATCCTAAAAGGGAACAAGCAATACGGGAACGTATGAAGAAAAAGTTAAAGAAACTGGAGCGAATCCCTCCCCAACTCATCCCCATTGAGGATTTCATAAAGCCTGCAAAGTTTCTAGATGAAACCAGAGTGAGGACCCCTCCTCAAATAACACCAGAA…
ENSXETG00000023506	kiz	-0.21408427132384328	kizuna centrosomal protein [Source:Xenbase;Acc:XB-GENE-5892317]	ATGGCGGAAAATCACTATGGCGCCTCTGATTATGACCATCGGGCCATGAAACTGCAGCGGAATCTCAGAGAATGTGAAGGAAAGAGATTAGCGTTGGAAAGAGAGCTATTCCAGCACAGCTCATCTGATGCACACATATGCCATCTCAAGTACATTAAACTGAAAAACTCCTTGAAAGAAATATGTGAGCGTGGGAAGAAAGCCCGCCTTAGAAACCAGGCATTTCTGCATGAGTTTGACCTCATTGAAACACGACTCCATGGGTTGATATCCAATGCAAATGCTCTTCAGCAAAAGAAGATGCAGCTGAATTCACATCCGCCAGAAATTAACAAAGGCCCAAACATGTCAAGAAGCATGTATCATCCGGCAACAATCTTCATGGGCCGCCAAATGTCA…
ENSXETG00000004526	arf6.2	0.06594933920230525	protein mono-ADP-ribosyltransferase PARP15 [Source:NCBI gene;Acc:100491162]	ATGAATGAGCTGGTGATTGGGCAATCCTTTGTGATGCTGAAGAAAGGAGATATAACTGCGGAGTGTACAGACGCCATAGTGAATATCAATAATGATTCTCTGGTCCAAAACTTTGGGGTATCCAAAGAAATATTATCAGCTGCTGGAGATCTTGTTAAAGAAGAGTGCTATTTGTTAGGCCAGCAGCCCCATGGTGATGTTGTTGAGACTGGAGCTGGGAATCTACAATGTAGAAAATTAATTCACGTGATTGGTGCCTCAGACTGGTACAGTATAATTGCTGGAGTAAAGAAGGTTCTGGAAAAATGTGACCAACTTCATCTAATAAGTGTTGCATTTCCAGCTCTTGGAACAGGTGCAGGGGGCCTTTCAGCCAAGAGATCCATGGAGGCCATCCTA…
ENSXETG00000018461	nup93	0.24869971211331263	nucleoporin 93kDa [Source:Xenbase;Acc:XB-GENE-5823109]	ATGGATGGAGAAGGGTTTGGAGAGCTTCTGCAGCAGGCTGAGCAGCTTGCTGCAGAAACAGAAGGAGTTACTGAACTACCTCATGTAGAGAGGAACCTACAGGAGATCCAGCAGGCTGGTGAGAGGTTGCGCTCCAAAACCATGACTCGCACTTCTCAGGAGTCAGCCAATGTGAAAGCGTCTGTTCTGCTGGGATCAAGAGGTCTTGACATCTCTCACATTTCCCAGAGGCTTGAGAGTCTTAGTGCAGCCACAACATTCGAGCCTTTGGAACCTGTTAAAGACACGGATATCCAGGGTTTTCTTAAGAATGAGAAGGACAATGCTCTTCTGTCTGCCATTGAAGAATCCAGGAAGAGAACATTTGTGATGGCTGAAGAATACCACAGGGAGTCCATG…
ENSXETG00000030606	asl	-0.13817813563989295	nei-like DNA glycosylase 3 [Source:NCBI gene;Acc:549955]	ATGGTGGAGGGTCCGGGCTGCACGCTGAATGGGGAGAAGATCAGAGCGCGGGTTGAGAAGGGTCAGAGTGTGGTGGAGCTTCGGGGAAGCGCTGTGAGCGGGACGCCTCCTTCCTCCTGCTATAATGCCCTATCTTCACTTACCGGATGCAGCTACACAGGAGTGCAAACACTGGGAAAGGAGCTTTTTATGTATTTTGGACTGAAAGCAATACGTGTACATTTTGGAATGAATGGATCAATACGGCTAAATCAAGCAGTAAAAAAGGGCCAAGAAAACAGTAGACCTATGCCTGTAGCTGTTTTAGAAGTACAGCTTGAAAAAGACTTAATTTGCTTTTATGAGTCCACTGTAGATGTGAGAAATGTATCAGAATGTCAAGAAAAAATAAGATTCTTG…
ENSXETG00000032633	champ1	0.19880602165237424	chromosome alignment maintaining phosphoprotein 1 [Source:NCBI gene;Acc:100380176]	ATGGAAGTCATGAAAACATTTAATGAGTTGGACTGTGATCGTTGCAATTTTCATGGCACTGATTATGAGAGTGTGCAGATTCATAAGGGCACTATACATCCAGAATTCTGTGATGAAATGGATACTGCTGGTTTGGGAAAGCTAGTGTTTTATCAGAAAAGTGCAAGACTGTTTCATTGTCACAGATGCTTTTTCACCAGCAAGATATTTAGCAATGTTTATTATCATATTGTAGCTCGTCATGGAACTTCTGAAAAATGGGGCAGTGAAAAGAAGCTTATATTAGAGGCAAAGTCTGAGCCAGATTCTGTAGTTATTTCTGAGAAAAATTCTGAAAATGGCACAAGCGAAGATGAGAAATCTGTAGATGATCAAGAGCAGAAGGACAAATTAAGTGAA…
ENSXETG00000035210	echs1	-0.20120974331637326	NA	ATGGAAAACTCAAATGAAACATCTTTCAATGGATTCTTTCTCCTCAGTCTTGCTGATACCCCATCCCTAAAGGCCTTCAGTATTCTAACTTGCCTAATAATGTACATACTCACATTGTCCATAAACTTTTTACTTATCATCATGGTGAGGAACAATTTGCGGCTTCACAGACCGATGTATTTCTTCTTAAGCAACCTTTCAATGGCTGACATTGGCATAAGCACTTCAGTAGTACCTAAACTTATCATAATTACAATAACTCAAGATAAAAGTATTTCACGTCATGATTGTGCTTTACAGATGTTTTGCTTTTCTGCCCTGGTAGTGACAGAGAGTATTCTTCTGGCCGTTATGGCCTATGATAGATACACGGCTATCTGTAAGCCTCTGCACTACAAT…
ENSXETG00000036919	erlin1	0.1439589276659395	chromosome 22 open reading frame 39 [Source:NCBI gene;Acc:100485616]	ATGTCTGACACGGGTGGTTGGAGGCCACCACGTGACTGTGATGATTATTGGTCTGAATGGAAACACTGCAAGAGTCTGAGAAACCACTTCCATAATTATTACACCCATGGAAAAGCACCAGAGTGCCAGGAATGGAAGAGAGACTACATGACTTGCAGGGACTGGGAGAAAACAAAGAGTGAGCTTCTAAAGGAAACTTTGCAACAGAGTGAAAGGACAAGGCTTGAAGGCAAGCGGAATAACTCACCCGTATGGACATTGAGAAAAAATCCCCCACCAGACTGGTATCTGCCACTAGATGATAGAAAACCTAGACAATAA
ENSXETG00000020384	iqgap3	0.5390194432234596	IQ motif containing GTPase activating protein 3 [Source:Xenbase;Acc:XB-GENE-493015]	ATGCATAAGTTTGCACTTTTCAACACTGAACCTCATTTACCATTTTGCTTCCCAGTTTTCCAATTTAGTCAAATCGCTCTGCAAAGCGGCAGCATACCTTGCTATGAGCGCCTGACTGCTGATGAAATGGACGAGCAAAGGAGACAGAATATTGCGTACCAGTACCTGTGTCACCTAGAGGAGGCCAAACGATGGATGGAGGCCTGCCTCAATGAAGAACTGCCACCACCAACTGAGCTGGAAGAGAGTTTGCGTAATGGCGTCACTCTTGCCAAGCTGGGAAGCTTTTTCGCACCAGAGATAGTGCCACTAAAGAAAATTTATGACATTGAGCAGATGCGCTATCAGGCAACTGGGCTTCATTTCCGCCACACCGACAACATCAACCATTGGCGCAAA…
ENSXETG00000012275	acads	0.12652198203244622	acyl-CoA dehydrogenase short chain [Source:Xenbase;Acc:XB-GENE-855930]	ATGCCAGGAGCCCACGCACAATCCGCCCTACCCCCTGCTGCAAACAGAGGCCCAATATCCTCGCTCCGGCCCTTGCACACGGTGTATCAGACTGCAGAACTGCCGGAAACTCACCAGATGTTGCGCGACACTTGTAGGGAATTTGCAGAAAAGGAGCTGCAGCCGATAGCAGCCGGGCTGGACCGGGAGCATCGATTTCCCCGGGATCAGGTCCGACAGATGGGGCAGATAGGACTGCTGGCAGTTGAGGTCCCAGAGGAGCTTGGAGGGGCCGGACTTGATTATCTGGCATATTCAATCGCAGTGGAAGAGATCAGCCGTGGGTGTGCATCTACAGGGGTCATTATGAGTGTAAATAATTCTCTTTATTTAGGTCCTATCCTTAAACATGGTTCAGAA…
ENSXETG00000040366	atp9b	-0.13193950216952816	NA	ATGGAAAACATAAATGAAACATCTTTCAATGGTTTCTTTCTTCTCAGTCTTGCCGATACCCCATCCCTAAAGGTCTTAAGTAGTCTAACCTTCCTGATAATGTATATATTCACATTGTCCATAAACTCTCTACTTATCATCATGGTGAGAATCAATCTGAGGCTTCACACCCCAATGTATTTCTTCTTAAGCAACCTGTCCATCATTGACATTGGCATAAGCACTTCAGTAGTACCTAAACTTATCATAATTACAATGACACAAGATACAAGTATTTCACTTCTTGATTGTGCTGTACAGATGTTCTTCCATTCTGCCCTAGTAGTGACGGAGTGTAGTATTCTTCTGGCTGTTATGGCCTATGATAGATACATGGCTATCTGTAAGCCTCTGCACTAC…
ENSXETG00000011004	wdr36	0.19356802105257306	WD repeat domain 36 [Source:Xenbase;Acc:XB-GENE-972602]	ATGGCAGAAGAAAATGTGGCCCGGGGGAGCGTTCTATTTACCGGCTACAGATCCCTGGGGGTTTATAGCAACCATATCCCACACGTCGTTCGGTATCACAAGAAACACAAGGAGTTCTACCTGGTTACCTCCGTGGGGAAAAGCTTTTTGACTTACAATGTAAACAAACTTGGGCAAGTTGCAGTGAGCAATGCTCTTCCAGAACCAATCAGCTGCCTTGCTGCAGACAGAATGTTGGTATTTGCAGCACACAGTAACCTTCTCAAAGCATTTGCAAGAAACAAAGAGGTAGTTCATACCTACCAAGGCCATGAAGCTGAAATTCATCTAGTGCAACCATTTGGGGATCATGTGATCTCTGTTGACACCAGCAATGTTCTCATGATCTGGGACATCAAG…
ENSXETG00000008262	adam17	-0.07100941886303447	ADAM metallopeptidase domain 17 [Source:Xenbase;Acc:XB-GENE-492534]	ATGTGGTGCATCTGCCTCAGTTCCCTTGTCATACAACAACAATGCATTATGGAGAAAAAAAATATGATTGTGCTTGAAATTGCACCTTGCTTACTGCACTTGACAGGTCTCGACTCCCTGCTCTCCGAGTATGATGTCCTATCTCTGTCCAGCATCCAGCAGCACTCTCTCAGAAAGAGGGATTTACAGAGTCAGTCACAGCTTGAAAGAATGCTGAGCTTCACTGCGCTCCAAAGGCATTTTAAATTGTATTTAACATCAAGCACAGAGCTTGTCTCCGAAAATCTCGAAGCGCTGGTATTGGATGGGAATGGCAAGGAAAAGAAATACCAAGTAAAGTGGTCGGATTTCTTTACTGGACATGTTGTGGGTGAGCATAATTCCAAGGTTTTGGCACAC…
ENSXETG00000022908	tbc1d14	-0.008647150046280055	TBC1 domain family member 14 [Source:Xenbase;Acc:XB-GENE-991334]	ATGGGGGGAAGGAGGCGGCAGCTCGGTGTGTGGGGAGGGAGGGCTGAGCAGGAGGAGGAGGGCCACACACACAGGGAGGAAGCGCCTCCCTTCCAGGAACAAGCTGCAGCACCTGCCGCTAGGAGAGGAGGGAGAGGAGGGCTCAATCGTACGCTGGGACCCCTGGGGCAGCTCTCGAAGAAGTTCAGCTCAACCGGCCCATCATGGCGCGGACACCCCTCTGCCCTGCAGTCTCGCGCTTCCTGTAGACTTGGCAGCCTGCTGCTGGCTATGTCCCAAGCACAACATGAACCCCAACAGAATGGCGGCCTCCACAGCCCAGTTACGTCCTGGTCTAACATGAATAAAGACGTTCCAACCAACATTAGAAACTTAGGGTTCATTGAAGTCCAGGACATT…
ENSXETG00000002447	vegfc	-0.40229792610957277	vascular endothelial growth factor C [Source:Xenbase;Acc:XB-GENE-484533]	ATGCACTTGCTGGAAGGAGCGCTACTTGTTCTCTACTACACTGTTTGGGCGCAGCGCGGCGCAGCTTATGAGTCGGGACAGGGCTATTACGACGATCCGGAATTTGGCGACACAAAGGATCAGCCAGGAAGAGAACTGGAAGAGCAGCTGAGGTCAGTGTCCAGTGTGGATGAACTAATGACTCTCCTCTACCCCGAATCCTGGAAAATGTTTAAGTGCCAGCTACGACAAGGAGGCAGCACAGGATATGACACTAGGAGAGAAGACAGTTTTACATTTGCGGCTGCTCATTATAATTACAATGCTGAAATCTGGAAAAGTATTGAAAATGAGTGGAGAAAAACTCAGTGCATTCCCCGGGAAGTATGTGTGGATGTAGGGAAAGAATTTGGAGCACCA…
ENSXETG00000018601	ufd1	0.17793189748823549	ubiquitin recognition factor in ER associated degradation 1 [Source:Xenbase;Acc:XB-GENE-963687]	ATGTTTTCTTTCAACATGTTTGACCACCCCATACCCCGGGTTTTCCAAAACCGCTTCTCTACTCAGTACCGTTGCTACTCCGTTTCCATGTTGGCGGGTCCCAATGACCGATCTGATGTGGAGAAAGGAGGGAAAATTATCATGCCTCCATCTGCTTTAGATCAACTCAGTCGTTTGAACATTACTTACCCCATGCTCTTCAAGCTGACCAATAAAAATTCTGACAGGATGACACATTGCGGTGTTCTTGAATTTGTTGCAGATGAAGGCATATGTTACTTGCCTCATTGGATGATGCAGAATTTGCTGCTAGAAGAAGGAGGACTGTTACAGGTGGAAAGTGTTAACCTTCAAGTAGCCACATATTCAAAATTCCAGCCACAGAGCCCTGATTTCTTG…
ENSXETG00000022117	brwd3	0.1259961754234272	bromodomain and WD repeat domain containing 3 [Source:Xenbase;Acc:XB-GENE-5757854]	ATGCGCCTGCGCAGTTTCCCTAGTCGCTATAGCGCCACAAGCGGCCGGAGGAGCGCATCGCTGCTAGCTTTTGCCTTGTCTCTCAGTTCTTCTCAGGCCGGAGGGGGGATATTGGCTCCATCTAATGGGGGTGAGAGCGATGCGGTGAATCCGAGCAGGGAAGCAGCCGCTATGGGGGCTTGCCCTCTCTCTTTCTTACCCGCAGAGCTTTACTTCCTGATCGCCCGCTTCCTACAGTCTGGCCCCTGCCGGAGATCCGCACAGGTTCTGGCGGAGGAACTGGAGGAGTACCGGGTAAGGCTGGGCGGACTCCATGGGGGCAGTGTGGCAGCCAATAAACACATCCCATCAGACTACCTGCTTAAAATCTGCGAGCGTTTTGGACCTATCCTAGATCAA…
ENSXETG00000010005	chchd1	0.07262096057384068	coiled-coil-helix-coiled-coil-helix domain containing 1 [Source:Xenbase;Acc:XB-GENE-953241]	ATGGCTGCTCAAGGTATGTCTCTGCAGGACAAGGTTGCTAAGTTGTTGAGTCGCCGAAATGGGAAGCCTGGCATTAGCCGACGCAGTGCTATGTATGTATCCCTATATTTTGCAGAGGCAACTTGTATAACAGAAATGTCTGTAATGATGGCGTGCTGGAAACAGAATGCATTTAGTGACACAGCTTGTAATAAAGAGATAAAGACTTTCTACGACTGTGTTTCAAAAGAACAGGCTGCAAGAAAAGCTGGATTAAACCAGGAAGTCCAAGCAGGACGGTTGCCTCCAAAACAAGTAAACACATTACTGAGACGTTTCCCAAATATTGATCATGAAATATAA
ENSXETG00000037191	nol11	-0.3299247730121057	nucleolar protein 11 [Source:NCBI gene;Acc:101734283]	ATGGCTGCAGCCCATAGTGACCACCTTTTGTCTTTCCTGCAGCTCTCGGCCGACGTCTGTCGAATCCACACTCTGCCTGGCGCTGACCCGCTCGTGCTGTTCAGAGGAGGAGCCGTCCACTCCATAGACTCTTTACTCGCAGCCCCCCAGCAGGAAATTGAAAGCGTTCTGCCAGTCGGAGAGAGGATTGTGTGGTCAGAGATCTTTGCGGATGAAGGGCAGCCCCTGGTGGTCTACATTACAGAGCAGCTCTCCGATTATTTTGTGTACATTCACCAGTTCAGTCCAGTTTGTGTTTGTAAATATCTCCTGAAACCAAACACGGAAGGTTCCACTATCCTGGACTGTTCGGGGTCCATGAAAAGTAAAATATTCACCCTCCTAACCTTATACTCTTGC…
ENSXETG00000041117	NA	-0.15165153876500342	NA	ATGGATTCAAATCAAACCTCATCAAACAGATTCATCCTTCTTGGCCTCACCAATATCCCATACCTACAGGCAATATATGTTTTATTATTCTTTATAATCTATATAACCACCCTGTTGGGAAACTCCCTGCTTATAATCGTACAGCTGCAGACTCCCATGTACCTTCTTCTGAGCAACCTCTCCATTTTGGACATCTGCTTATCTTCCAACATAGCACCCAGAATAATGATAAACACTTTATCCCAGGATAGAAGTATTTCCCTCTTTGATTGTGCATTACAGATGTTCTTCCATTTGGCTGTAGGTGGGACGGAGTGTTTGATTTTAGCTGTTATGGCCTATGACAGGTATGCAGCCATATGTCAGCCATTACACTACAATACAGTTATGAACAAGACA…
ENSXETG00000025213	mgp	0.014912805836675952	matrix Gla protein [Source:Xenbase;Acc:XB-GENE-1003218]	ATGTTTGCTATAAACTTGTTATTAGTTAACGGGGCCCTGACCAAAGGTTGCACTTCCAAGGCAAGGGTGAACTTAGAAAGCCCAACAAACATGGGTCTAGAGGCAACATATTTGTTATCCCTCCATCTGTGTGGGTTTCCTTTGAATATTCTGGTTTCTTACCACACTGCAAATACATATAGACTGCACATTATTTTTTTCAGAATCCGCGAGCGCAACAAGAGCCCCCGAGAGCGCCAACGAGAAGCTTGTGAAGACTATGATCCTTGTGAAAGATATGCTTTACGTTACGGGTTCTCTGCTGCCTACAAGCGTTACTTTGGACAGCGTCGCGGAGAAAAGAAATAG
ENSXETG00000037121	NA	-0.33572599314647195	NA	ATGGAGAACTCAAATCAAACCTCGTCGAACAGATTCTTCCTTCTCGGCCTCACCAATGTCCCATACCTACAGGCAATATATGTTTTATTATTCTTTATAATCTATATAACCACCCTGTCAGGAAACTCCCTGCTTATCATCATAGTGAGGATCAATGAGAGGCTGCAGACTCCCATGTACTTTTTCCTGAGCAACCTCTCCATAACTGATATCTGTGTATCTTCCACCGTAGTACCCAGAATAATAATAAACACCTTATCGTGGGATAAAAGTGTTTCACTCTTAGACTGTGCATTGCAGATGTTCTTTAGTTTAGCTGTAGGTGGGACGGAGTGTTTGATTCTAGCTGTTATGGCCTATGACAGGTATGCAGCCATATGTCAGCCATTACACTATAAT…
ENSXETG00000032403	atp6v1e1	0.2509691391511516	NA	ATGTACTTGCAGGCTTGTAGTGTGAGAAAAAAAATATATGTAGATGGTCAAAACTACTATCAGAGTATTGCTTTGTTATGGTACGGAGGAATTTTCTGCACTGATACAACATGTGTCCCTTGGCATTTAGTTTATTTATTTCACAAACATCCAGAATGGGATTATGGACTGAGCACCAGCAAAGAAGTTTTAAAGCACTTCAAAATCGAAAGCAACACAGTGGCACTGTTCCGACAGGTAGACAACAAGAGAGATGACTTAATATTAAAAGACCACCCAGGAATCAATACTGAGAAACTCTTCCGTTTCTTGACTATAAATGAACTGAGAACGGTGACAGATTACAACGCAGTGACAGCAGTTGGACTTTTAAACAGCAAAGTTCAAATCCACATGCTC…
ENSXETG00000009727	prkag2	0.057017914612794124	protein kinase, AMP-activated, gamma 2 non-catalytic subunit [Source:Xenbase;Acc:XB-GENE-1010726]	ATGGGAAGTACAGTCATGGATACCAAGAAGAAAAAGGATCTGCCCAGGAAGCCCTCCGGCCAGAGGAAGAAGATGCTGAGAGTCCACATCCCTGATCTCAGTTCCTTTGCTATGCCGTTTTTGGATGGAGATTTGGATAATGCAGAGAAAAATTCCCAGCGCAAGGCAGAGGAGCCTTGCAGCACTGGAAGCCCCTCCAAAAGCTTTTTTCCCCGAGGCCTCCAAAACCAGCCATCGAGTCCGTTATCCGCCCCCGTCAAAACCAAGTACAGCCCCGGATCTCCCAAGACTGTCTTTCCCTTCCCGTACCAGGAGTCCCCACCTCGCTCCCCGCGTCGGATGAGCTTCAGCGGCATCTTCAGATCCTCATCCAAAGATTCTTCTTCCCCCAACTCAAAC…
ENSXETG00000037087	dusp11	-0.27657511321415024	dual specificity phosphatase 11 [Source:NCBI gene;Acc:100151717]	ATGCTGAGGAGCGTGTGTTCCCTCTCAGGCCGGCTGCCAGCAGCACTTCCGTTTCGGTGCCATTCAGGGAATATGGGGAAGCCCAAGAACCATCTGCCGGACAGATGGACAGACTATGTTCCGCTTGGAAAGCGCATCCCGGGAACACGTTTTATTGCTTTTAAGGTCCCTTTAAAAAAAATATTCAATAGCAGGATTGAGGCATGGCAGAGATTCTCATCAGCCGACCTCATCAGGGACATCCAAGCCCAGGATGAGGAACTGGGGATAATAATTGATCTAACATGTACCACTCGATACTACTCCCCAGAGGAGTTACCAGAATCACTAAACTATGCAAAGATCTTCACAGTTGGGCATGAAGTGCCAAGTGATGAAACCATCTTTCAGTTCAAATGC…
ENSXETG00000036663	spcs3	-0.19428680754825572	signal peptidase complex subunit 3 [Source:NCBI gene;Acc:549848]	ATGAACACCGTTCTTTCCCGGGCTAATTCGCTCTTTGCCTTTTCTCTGAGCGTTATGGCTGCGCTCACCTTTGGGTGCTTTATCACCACCGCGTTCAAGGAGCGGATAGTTCCTGTCAACATTCATGTGTCCCGGGTGATGCTGGAGAATGTTGAAGATTTTACTGGTCCCAGGGAAAGAAGTGACCTTGGATTTATTACATTCGATATAAATGCAGATTTGCAGCCGATATTTGATTGGAATGTTAAACAACTATTTATTTATTTGTCTGCTGAGTATGCAACTAGAAGCAATACTCTGAACCAGGTTGTACTATGGGACAAGATCATCCTCCGAGGAGATAATCCAAAGTTGTCCTTAAAAGAGATGAAATCAAAGTATTTTTTCTTTGACGATGGA…
ENSXETG00000021125	bbs9	0.17993693162179433	Bardet-Biedl syndrome 9 [Source:Xenbase;Acc:XB-GENE-954596]	ATGTCATTATTCAAAGCACGAGACTGGTGGTCAGCCTCACTAGGAAAGAATGAAGAGTTTGATCAAGGGTGTTTGTGCGTTTCTGATGTTGATAACAGCGGAACTGGTCAAGATAAAATAATAGTGGGCAGTTTGAGTGGCTACCTCCGCATATTCTCTCCTCATCCATTAAAAGCTGGAGATGGGATGCAAGCTGAAGATTTGCTGCTAGAGGTACAGCTGCGAGATCCAGTGCTTCAAGTGGAAGTGGGAAAATTTGTGTCTGGCACAGAAGTTCTTCATCTTGCTGTATTGCATCCCAGAAAACTTTGTGTTTATTCTGTGTCAGGCACACTGGGGAATGTAGAACATGGAAATCAGTATCAGATTAAACTGATGTATGAACACAATCTTCAGCGA…
ENSXETG00000023090	ncaph2	0.3775369400182287	non-SMC condensin II complex subunit H2 [Source:Xenbase;Acc:XB-GENE-993063]	ATGGATGACGCAGAGTCAAGGTTCACCCACCTCCTGCAGCCAATCAGGGATCTGACGAAGAACTGGGAGGTGGATGTAGCAGCTCAGTTGGGTGAATACTTGGAGGAGTTGGACCAAATTTGCATTTCCTTTGATGGTGGGAAAACTACAATGAACTTTGCAGAAGCTGCTCTTCTCATCCAGGGGTCAGCATGTATCTACAGTAAAAAGGTGGAATACCTTTACTCATTGGTGTACCAAGCTCTGGATTTTATTTCCAATAAAAAGAGGGACCAACAGCCAGCTTCCGTAGGAGCAGATGGGGTGGATAAGGATGCCACGTTTGCACATCGCAATGATGAAGAGGAATTTCTAAGTCTAGATGATATAATTGACCCCAAGAAAACAAATGTGGACATA…
ENSXETG00000002772	arhgdib	0.6254603529876026	Rho GDP dissociation inhibitor (GDI) beta [Source:Xenbase;Acc:XB-GENE-943891]	ATGACAGAGAATGAGCCAGTCCCACATGATGTGGAAGATGACGACGAGCTGGATGGGAAACTGAATTACAAACCCCCACCCCAGAAATCCCTACAAGAAATACAAGAGCTTGACAAGGACGATGAGAGTTTAGCCAAGTACAAGAAGTCATTGCTAGGAGATGGACCCGTGGCAGCAGATCCATCAGCCCCAAATGTGATTGTAACTCGCCTCACGTTGGTTTGTGCAACTGCCCCAAAACTGATCACAATGGATCTTACTGGAGATTTAACAAATCTGAAAAAAGAGACGTTTGCTCTCAAAGAAGGAGTTGAATATAGAGTAAAAATCCACTTTAAGGTCACTAAAGAGATAGTTTCTGGGCTGAAGTATGATCAGTATATATACCGCGCAGGAGTG…
ENSXETG00000009503	ankrd52	0.49729382492514795	ankyrin repeat domain 52 [Source:Xenbase;Acc:XB-GENE-1002005]	ATGGGAATCCTCAGCATTACTGACCAGCATCCACTGGTCCAAGCAATATTCAATCGCAACCTAGAAGAAGTACGTGCATTGCTAAGCCAGAAAGATAATGTCAACGTGTTGGACCAAGAAAGACGCTCTCCCCTGCATGCTGCTGCCTACTTAGGAGACATCCCAGTTATTGAACTTTTAATTCAGTCAGGTGCTAACGTAAATGCAAAAGATTCGGTTTGGCTTACTCCTTTGCACCGAGCTGTGGCTTCACGCAATGAGAGAGCAGTCTCCCTCCTTGTGAAGCACTCTGCTGACGTCAATGCTCGAGACAAGCACTGGCAAACTCCACTACACATCGCTGCTGCCAACCGGGCAAACAAATGTGCAGAGACGCTAATTCCGCTAGTGAAAAATGTC…
ENSXETG00000040720	hdhd5	0.16401895070784325	cold-blooded animal-specific wound epithelium receptor-binding protein [Source:NCBI gene;Acc:100135223]	ATGAATGCCGTGTTGTGCCTGTCCCTTGGGACTTTGCTGTGTGCTTTCCATGCCCATGGGGGCACCCCAGAAGTTCAGATATCCGGCCCAGAGTTCCCAGTTTTTGAAGGAGACGATGTCACATTGGAATGTTCTTCAGGCAGTTACTTTGATATGAGGAATTTTACTTTCCAGAAATACAGCAAGTGGATGAACCGGTGGTTCGACCTGGATACAGTCCAGTATTTTCGATGCTGGTACTACAACCTGAATGTTTCTCGGGAGGGGGGCCGCCTTCTTATGCAGCTCAATGACTTCTCTGAGTGGCAGAAGGGCCCGTACCGATGCATTTCCTCCGGGGATAACATCACCGACATGGCGGTCTCGGAAAACTTCACCTTTATTGTGTATTACCTGCGG…
ENSXETG00000004525	nmi	0.1929708952008243	N-myc and STAT interactor [Source:Xenbase;Acc:XB-GENE-492655]	ATGGATACAAGCATGGAGATGTCCAGAAATCCACTGGGGGAGGATCTGAACAACTCCAAGCAAAGTGAGAAAGTAGACTCGGTGCTTGAAGATATGGATGTAGAAGACCACACAAAAGAAGGAAATAGTGAAGAAAAGTTTAACAGATCCTTGAATGCAAGCATGGAAAGCCGTGGGGGGCTCCAGTCGGAATGTGACCACTGGAAGTTTAACAGATCCTTGAATGCAAGCATGGAAAGCCGTGGGGGTCTCCAGTCGGAATGTGACCACTGGAAGTTTAACAGATCCTTGAATACAAGCATGGAAAGCCATGGGGGGCTCCAGTCGGAATATGACCACTGGAAGGAAAAACATGATGCGGCAGATAACCGTAGATCGAACTTAATCATGGAGAAAGTG…
ENSXETG00000010009	usp54	-0.2121456044045828	ubiquitin specific peptidase 54 [Source:Xenbase;Acc:XB-GENE-940633]	ATGTCCTGGAAGAGAAATTATTTTGCTACAGGTCGAGGAGGAGTTCAGGAGATGTTTACACCACGCAATTCAATATCCATTGCTCCTAGCAAAGGCCTGATTAATGAGCCAGGACAAAATAGCTGCTTCCTAAACAGTGCACTACAGGTGTTATGGCATCTAGACATATTCCGCCGGAGCTTCCGACAACTTACAACACACAAGTGTATGGGAGACTCCTGTATATTCTGTGCACTGAAGGGAATCTTCAACCAGTTTCAGTGTAGCAGTGAGAAGGTGTTACCATCAGATACTCTTCGTTGTGCTCTTGCTAAAACATTTCAGGATGAGCAGCGGTTCCAGTTGGGCATCATGGATGATGCAGCAGAATGCTTTGAAAACTTATTAATTCGCCTTCAC…
ENSXETG00000041045	prtg	0.2750414526210051	protogenin [Source:NCBI gene;Acc:100496178]	ATGGCGGCTTGCAGAAGGCGACTTCCCCACGGGGTACTCTATTGGGTAACCCTGTTCAGCCTCCCAGGGATTTTGTGTTTTAGTGATCTGATGTTTGTTAAAGAACCTCAAGATGTAATCATTTTACGGAGAGATTCAGTGGTTTTAGACTGCCTGGCTAATGGAGAAGCTCCAATAACAGTCACGTGGATGAAGAACGGAGTAAAGATTTCTGAGAATGAACGGATATCCACATTACACAATGGATCCTTGTACATCCGTGAGGCAGAGGGCAGGAAAGGAGATCAATCTGATGAAGGATTTTATCAGTGTTTGGCTTTGAACAAATTTGGTGCCATTCTAAGTCAAAGAGCTCATCTTTCATTTGCAAGCATGTCAGGATTTGAAGAACAACCTGTG…
ENSXETG00000041384	ndufb8	0.22622293938643642	NADH:ubiquinone oxidoreductase subunit B8 [Source:NCBI gene;Acc:733466]	ATGATGGCGGCTCTCAGTGCCCGCTGGGTGAGAAGTCTGACCCGCAGAGCCGCCTTGGGAGCGTACTCAGTGAGTGGGGATCATGGTGCTTCGCTGGTGCAGAGATCGGCAGTAAGAGCAGCATCTGGGGCTGCAAAGAATGATTTGCCAGGACCATATCCAAAGACGCCAGAAGAAAAAGCAGCTGCAGCTAAGAAATACAACATGAGGGTGGAAGATTATGAACCCTACCCAGATGATGGAATGGGCTTTGGTGATTATCCAAGGCTCCCTGAGAAATCTCAGCAAGAAAGAGACCCATGGTACTCTTGGGATCACCCTGACCTTAGAAGAAATTGGGGGGAACCAATGCAATGGGACTTTGACATGTACATCAGAAACCGGGTTGATACTTCACCC…
ENSXETG00000035748	NA	-0.0032634620707240602	olfactory receptor 5V1-like [Source:NCBI gene;Acc:101730588]	ATGAGTGTTAACAAGGACTTAAATGTAACCACTGACAACAGATTTATCCTTCTTGGTCTCACTGACGTCCCATACCTACAGGTTTTATGTGTTCTACTATTACTGGTTTTATATATAATCACACTTTTGGCAAATGGCATACTCCTTATAGCAGTGAGACTTAATACACAACTGCAGACGCCCATGTATTTCTTCCTAAGTAATCTCTCTGTAGTAGACATTGACATCTGTTATTGTTCCACCGTAGTACCCAGAATCATAATAAACACTTTATCCCAGGATAGAAGTATTTCCCTCTTAGACTGTGCATTGCAGATGTTCTCCCATTTAGCTGTAGGTGGGACGGAGTGTTTGATTCTAGCTGTTATGGCCTATGACAGGTATGCAGCCATATGTCAG…
ENSXETG00000021363	c1qbp	0.12658119156784173	complement component 1, q subcomponent binding protein [Source:Xenbase;Acc:XB-GENE-973232]	ATGTTCTCCACACTGTCCCGAGCTCTCTTATCCGCCACACGGGTAGCGGCCGTACGGCCCCAACAGCTGCTGAGCTCTTTGTGCACCGGACGATCCTTCTCACGCTCATTATGTTTGCTCGGGGGGAATCCGGGGCTCAGGCAGACTTTCCTGCATCCTCAACGTGGCTTCCCGGCCGTGTCCTGTGGCTGTGGGGGACTGCACACTGAGGGTGACAAGGCATTTGCTGAATTTCTCAAAGATGAAATCAAAGAAGAGAGAAAGATCCAGAAACATAAGAACCTTCCCAAAATGTCTGGTGGGTGGGAATTAGACATCAATGGCACAGAGGCTAAACTGGTCAGAAAAATATCAGGTGAAAAGATTGCAGTTACTTTCAACACAAACAATAGCATTCCA…
ENSXETG00000027916	asb5	-0.3141511642069094	ankyrin repeat and SOCS box containing 5 [Source:Xenbase;Acc:XB-GENE-950779]	ATGACGGTGCTAGAGGAAAAACCTTTTGCTCAGCAGCTCTCGAATGTCTACTTCACTATCCTCGCCTTGTTCTGCTTCAAATTATTCGTGAAAATAAGCCTTGCCATACTCAGTCATTTCTATATTGTAAAAGGCAATCGGAAAGAGGCAGCACGGATAGCAGCAGAGTTCTACACAGTTACTCAAGGACAAGGTACTTTACTGGCTGATTAG
ENSXETG00000021603	thy1	-0.23601661102030275	Thy-1 cell surface antigen [Source:Xenbase;Acc:XB-GENE-493820]	ATGAGACCTGGTCCAAAGCTACGGATAGATTGTCGTTACCTAAACACCACAAACAACCCAATGCGCTATGAATTCAAAGTAAACCGAGGTGGAGAGCCACAGATCATCCTCAGTACCATTAACGTCAACTTTTTCAGCGACAAGTACCATAACAGGGCAAGCCCTTCCATCACCCGTGGCCTAGTTCAGCTGCACCTTGAGCGTTTCAATGCTTCAGATGCTGGGTTGTATACCTGCAATTTGTTTATCCCTAACGATCTAACGATTAATCAGACAGCCTCTATCGGAGTCCAAAAGGACAAACTGGAGACCTGTGGCGGAGTCAGTCTTTTTAACCATGGCTCTTCTTGGCCATTTGCCTTCCTACTTTCACTTCATTTACTCCTCGCTGGAGGTTTT…
ENSXETG00000030889	rraga	-0.6090348487301522	aquaporin 11 [Source:NCBI gene;Acc:100038073]	ATGGATCCGGCTCAGGCGCTGTGGGGCTCGGCGCTGTGGGGCTCGGCGCTGTGGGGCTCGGCGCTGTGGGGCTCGGCGCTGCTAGTGTTGGGGATCGTCCTGCAGTGTGAGGCGCTGCGGGCAGTGAGCGGGAAGGGGCTGCGGGACGGGCTGCCCAAGGAGCTGCTCCGGGAAGTGATCTGTACCTTCCAGCTGTGCTGCTGTGTCCGGGAACAGGCGCTGCTGGGATGGGAGGGCGCCCTGACCCCCCGCCTGGGCCTGACACTCACCTTCCTGCTCAGCCTGCTGCATGGACTCACTGCCCGGGCCGTGTGCAACCCTAGCGGCAGCCTGGAGCGCTACCTGCGGGGGGAGGAGGCGGCCCCCCAGTCCTGCCTGCGGCTCTGCGCTCAGTTCCTG…
ENSXETG00000003264	pacsin2	0.0668652026432782	protein kinase C and casein kinase substrate in neurons 2 [Source:Xenbase;Acc:XB-GENE-489578]	ATGTCGGGCACCTACGATGATTCCGTCGGGGTAGAAGTCTCCAGTGACAGCTTTTGGGAGGTGGGGAACTACAAACGCACTGTGAAACGGATAGACGATGGGCACAGGCTGTGCAGCGACCTGATGAACTGCATCCACGAGCGGGCGAAGATAGAGAAAGCGTATGCCCAGCAGCTCACAGAGTGGGCAAAGAGGTGGAAACAGCTAGTGGAGAGAGGTCCCCAGTATGGAACTGTGGAGAAGGCCTGGCACAACCTGATGACAGAGGCCGAAAAAGTGAGCGAACTGCATCTGGAGGTGAAAAATGCATTAATGAACGAAGACTTTGAGAAGATCAAGAACTGGCAGAAAGAAGCCTTCCACAAGCAAATGATGGGCGGCTTTAAGGAGACGAAAGAA…
ENSXETG00000026230	rpp21	-0.06931768651246858	ribonuclease P/MRP 21kDa subunit [Source:Xenbase;Acc:XB-GENE-944811]	ATGACAACACAAATTAAAGACAAAGAAGCTTTTCAGAGACTTAATTTTCTATACCAGGCTGCACATTGCGTTTTGGCTCAAAACCCAGAAAATGTAGAGCTGGCTAGATTTTACTGCCATACTGAAAGAATGATTAGCAAACGATTGGTGTTGAGACAGGACCCATCTGTCAAAAGAACTATTTGTAAAAAATGCAGCTCTCTACTTATATCTGGTGTGACTTCAACAGTGCGACAAAAAAAACTTCGTGGGCAACGGAAAACTGTTGTTAAATGCCTGACTTGTGGGCTTACTAATCGATTTCTCAGTAACCCAAATTACAAGCTGTGGTGTGAGCAGCCAGAGGCTCTATTGGAAAACCAGCCCAAAACAGATCAAGATAAAAATCCTGTACATCAA…
ENSXETG00000009243	nectin1	0.2617885646403365	nectin cell adhesion molecule 1 [Source:Xenbase;Acc:XB-GENE-986141]	ATGGCTCCCAGGCGGAATGGGGACTGCTGCAGCCGCTGCCTGTGGTGGCCCCTGACTATCAGCGTGTTGGCATCAGTCTTCCAAGGAGTACACTCGCAGATGGTACTGGTAAATGAGACAGTTTCTGGATACATTGGTGACGATGTCATGCTTCATTGCAATTTTGTAAATGCTATATCCAGTGTAAAAATCACTCAGGTTACATGGCAGAAGTCCACAAATGGCTCAAAACAAAATGTGGCCATCTATAATCCCTCAATGGGAATGGCTATCCTTCCCCCTTACAAGGAACGTGTATCCTTCCTAAGCCCCTCTTTTCGGGATGGTACAATCAAGCTGACCCGATTACAACTGGAAGATGAAGGAGCATACATCTGTGAATTTGCTACTTTCCCCACA…
ENSXETG00000035090	pde6h	0.4818986779454135	phosphodiesterase 6H [Source:NCBI gene;Acc:549499]	ATGAAAAATGTTTCCTCTACTGACTCTGCCATCAATATCATGGATTTCAATACTGAATTACCCCACCTTGGCTTGGTGATGAATTCCGGCTCACCAGCATCCAGTGCTCTGGCTCCTGTCAACAACAGTGGGGGTCCCACTACTCCTCGCAAGGGACCCCCCAAGTTCAAGCAAAGGGCAACCCGTCAGTTCAAGAGCAAGCCCCCTAAAAAAGGGGTGAAAGGGTTTGGAGATGACATCCCAGGGATGGAAGGACTGGGAACTGATATCACTGTGATCTGCCCTTGGGAGGCGTTCAGTCACTTGGAGCTCCACGAACTTGCTCAGTTTGGAATCATTTAA
ENSXETG00000038649	NA	0.09109217371944353	uncharacterized LOC100490440 [Source:NCBI gene;Acc:100490440]	ATGGAACAGGCTGAAGACATGACAGATACTCAGATCCCTGCAGATGCTGCATCCCCTGATCCGTTTTCTCTCCCTGAATCCCTGAATTTCACTGTTGCCATTATAGGACCCAAGGGATCAGGAAAGAGTACACTGGCCAGGGTGCTGAGCCACCAAACTGAGCAGTTCAGCAATGGCTTCCTGGACTCATACTTCAAAGGAGAGGAAGAGTCCCATGAAGTTTCCAAGTATCCTTATCCCCCTTTGCCCAATGTTACTCTTTTTGACTACCCTGGGTACAATCCTGCAGACTCTGTAGCTTCTTACCTAGATGGGATTAAGCTAGACACGGTGCAGTACCTCCTGGTGACTGTAGGGGAGGCTGTATCTGACACTGAACTTCAACTCCTAGGAACGCTT…
ENSXETG00000014204	hif1an	0.0723915010813859	hypoxia inducible factor 1 subunit alpha inhibitor [Source:Xenbase;Acc:XB-GENE-966944]	ATGGCGGAGGCTGGGGTTTCGGCGGCGGAGGCTGTGGCAGAGACAGAGAGACAAGGGGGTGGGGAAGCTGAGCTCCGCTGTCCTGGCTGGAGTGAGTCGCAGCTGCGGTCTTACCAATTTCAGACGCGACAGATTCCGCGACTACAACACGGAGACCCCCGGGCAGAGGAGCTCATCGATAAGGAGGAGCCAGTTGTTCTGACAGATACAAACTTAGTACATACAGCACTGAAGTGGGATTTGGATTATCTGGAGGAAAACATTGGAAATGGGGACTTTTCTGTGTACAGTGCCAACAGCCACAAGTTTCTATATTATGATGAGAAGAAAATGGTTAACTTCAAGAACTTTAAGCCCAAGTCCAGCAGGGAGGAAATGAAATTTCCAGAGTTTGTAAAT…
ENSXETG00000039447	CHCHD5	-0.042177184858533195	coiled-coil-helix-coiled-coil-helix domain containing 5 [Source:NCBI gene;Acc:100495117]	ATGCAGGCCGCATTAGAAATAACCGCCAAATATTGCCGCAATGAGATGGAGGAGTATGGCCAGTGTGTCACCAGCAAACCAGGGACATGGCAACAGGACTGTCACCAGCTGAAAGTAAAGGTGGCTCAGTGCACCTCCTCCCACCCGGTTATTCAGCGCATTCGCTCTCAGTGTTCGGAACCTTTTGGGGCATTTGAGCAGTGCCTGAAGGAGAACCAAGCATCTGTGGAAAACTGCACAAAGCATGTCACGGATTTCCTCCGCTGTGCGGAGAGTGTCAAGCTTACGGAATAG
ENSXETG00000012077	adam21	0.12705793281446529	ADAM metallopeptidase domain 21 [Source:Xenbase;Acc:XB-GENE-5867494]	ATGGCCTTCTCCCTTCCCTTCATTATATGCCAGGTTATTGTGGCGCTGACCATTGATCTGAATTTGACCGACTGGCTGGGCTCATATGAAATTGTAACACCATTGCTGGTAGAAGAGAGGATTGTGAATAAAACAAGAGAGCTTACCTATGTAATTATGATTGACAGAACAGACTACGTTATTCACTTAATTCGTAATCCGATGCTTGTTCCTACAGACTTTAAAGTTTTTTCCTACAACAAAGCATACTCCTTGTATTTTGACGAGCCCCACATTCTTACACAATGCTACTACCAAGGATATATACAAGGATACCCAAACTCAGTAGTGGCTATGAACACATGCTCTGGACTTAGGGGCATCATGCATACAGATGAATTTATATATGCAATTGAACCA…
ENSXETG00000013671	pbrm1	0.5234560257942755	polybromo 1 [Source:Xenbase;Acc:XB-GENE-6450126]	ATGGTGAGTTCCAAGAGGCGCCGCACCACCTCCCCTTCCAGCAGTGCCAGTGGGGGGGACTTTGATGATAGCCCCCACTCTACAAGTACCCCAAACTCTGGTCGCAAGAGAAGGCGCCCCGCTAATGTGGCCTCTGTGGATCCAATTGCCGTTTGCCATGAACTTTACAACACAATCCGGGACTATAAGGACGAGCAGGGCCGGATCCTGTGTGAGCTCTTCATTAGGGCCCCCAAGCGCAGAAACCAACCGGATTATTATGAAGTGATTTCTCAGCCGATTGACCTGATGAAGATTCAGCAGAAGCTGAAGATGGAGGAGTATGATGACGTGCGCTTACTGACCGCAGACTTCCAGCTGCTGTTCCAGAATGCTAAAGCTTATTATAAGCCTGAAAGC…
ENSXETG00000034480	NA	-0.24212738683377139	NA	ATGGAGAACTTAAATCAAACCTCATCGAACAGATTCATCCTTCTTGGCCTCACCAATGTCCCATACCTACAGGCAATATATGTTTTATTATTCTTTATAATCTATATAACCACACTGTCAGCCAACTCCCTGCTTATCATCGTAGTGAGGATCAATGAGCAGCTGCAGACTCCCATGTACTTTTTCCTGAGTAACCTCTCCATTATAGACATCTGCTTTTCTTCCACCATAGTACCCAGAATCATAATAAACACTTTATCCCAGGATAGAAGTGTATCGCTCTTAGACTGTGCATTGCAGATGTTCTTCCATTTAGCCGTAGGAGGGACGGAGTGTTTGATTCTAGCTGTTATGGCCTATGACAGGTATGCAGCCATATGTCAGCCATTACACTACAAT…
ENSXETG00000000641	lmx1b.2	-0.2996887830845551	LIM homeobox transcription factor 1, beta, gene 2 [Source:Xenbase;Acc:XB-GENE-920041]	ATGAAGACAGAGGATGCACCATCGTCCTGCCGAGAACACTCTCCATTCCTTGGCCTCGATCACAAAATAAATGAAGTCTGTGCCGGTTGTGGCAACACCATATCAGATCGATTCCTGCTAAGAGTGAATGACAGATCGTGGCACGAGTGTTGTGTAAAGTGCGCGGCTTGCCTACAGATTCTCTCCGGGACCTGCTACTACAGGAACCGCCAGCTTTACTGTAAGGAGGACTATGACAAGCTTTTCGCTACAAAGTGTAACAGCTGTCTAAAAACAGTGCTGCCATCGGAGCTCATCATGCGTGTCCTCAGCAACGTGTACCACGTGGCCTGCTTCTTCTGCTGTGAGTGCGAGAGGAGGCTGGAGCGGGGAGATGAGTTTGTGCTGAAGGAGGGGCAG…
ENSXETG00000009248	trim29	0.1214086893181002	tripartite motif containing 29 [Source:Xenbase;Acc:XB-GENE-490036]	ATGGAAGAACAAGACACTAAAAAATCCAATGGTTCATTTTCTGAAGATGCCAATGACACAAGTATTACTGATGAGAAGGACATTCAGAATGGACCTGGCTTTGATCAAGGAGGCACAAAAACAATCCTGAAAACCAACATTAGCTCTGGAGGGGTAAAGGGTGGCAGAGTGAGTTTTGGCTCTGAGAGCCCTGAAATCCGGCGCTCTGGCCGTACAAGTACTAGCTCTAACATAGAACCTGATGATGTTCTGTGTGATTCATGCATTGATGACAAGAAAAAGGCTGTTAGGTCTTGTCTGGTCTGTCAGACATCCTTCTGTGAAACCCATCTTAAGCCCCATCTGGAGGGGGCTGCTTTTCGTGACCATAAGCTATTGGAGCCCATTAGAGACTTTGAG…
ENSXETG00000040501	NA	0.021629063191770687	zinc transporter ZIP9-B [Source:NCBI gene;Acc:613053]	ATGGATGGGCTCGTCGTTGTCTTCCTTATCTCCCTGGCCATGTTCCTGGGCTGCTTCCTGCTGGGCATGATCCCGCTGGCATTTAAACTTTCAGAGCAAAAGCTGCAGTTTGTGAGTGTGTTTGGCGCTGGGCTCCTGTGCGGCACGGCTCTGGCCATCATTATCCCAGAAGGGGTGGAGCTGCTGGATGGACCTGGCAAGGAAGGTCCGGTGATCTGCCAGAACCTCACACAGAACCACACAGAGATCAGCAGGACGAGCGAAGATGCAGCAGAAAAAAGCTCCTCCGTCCCTCCCCATTTCTTTATTGGGGTCTCCTTGGTGATGGGGTTTATTCTCATGTTCATCGTGGATCAGATTGGGAGTTATTGCTCCTACCATGATCCTCGGACAGGAATG…
ENSXETG00000034292	dstyk	0.273399368598788	immunity-related GTPase family, Q [Source:NCBI gene;Acc:100490614]	ATGGAGACTCTTGGGGAGTTGAGCCTGTCTGAGGAGAAAACCCATCCGTGGGGCACTGAGGATCCCACACCATGCCTGACAGAGGAGTGCTGTGAGTTCTCGGTGGCAGTTGCGGGTAGCCCCGGTGTTGGCAAAACTGTTTTGATCCAGGCTCTCCTTGGCCTGACTGAAAGCCACCAACACTCCAACGCTGCCTCCCTGCACCCCACAAGACCCGGAGGTCCCTTACTGTACATTCACCCCTCTCACCCTGGTTTGAGCCTCTGGGAGTTGCCCCTGGAAGATGGATCACCTGAAAAGTGGATTTCGGAAGCTGACCTCCTGCTGCTGGTCACCAATGGGTGCTTTTCACCTGTCCATATAGATTTAGCTCGCAGTGCCCTCTCCCAAGGGAAAAAG…
ENSXETG00000037753	il17rd	-0.6687930832519173	NA	ATGAAAACTGCAGTTATTTTAGTCGTTTTGGGGATGATGTTGCTACATGCTGAAGCTTTGAAGTGTCGGAAAAGCGCATGTACTGGCCTTAGACCATGCACGACTACTGAAGTAACATGTGACTCAAAGTCCACTCTGTGCTTTGTGATGACGCGCTCCAAGCCCATAGTTTCACTAACTCGTGGGTGCATCACGGAGGCAAATTGTTCCATACTGAAGGGTTTTGATCCTAATGTTCGGTGCTGTTCCAATGACCTCTGCAACTAA
ENSXETG00000000644	clec4e	0.10287741954119731	C-type lectin domain family 4 member E [Source:Xenbase;Acc:XB-GENE-6035508]	ATGGTGCTTGTGTTTAAGGTTGGGGATCCCTGCTGTATATATATAAATAGTATACTTTTGGCTGGGCAAATAACAATATATACTTTGTACCTGTTTCCCCATTCAGAAGAGGCCTGTGATTCTGCCTGGATACAGTTTGAAGACAGTTGTTATTACATTACCACAAAGAAGACAAACTGGCAGAAAGCCCGCTCTTTCTGTGTGCAGGAGGGAGGCGACCTGGTTGTTGTTAATAGTGAAAAAGAACAGTTTCTAAAAGAAAAATCCGGTGTAAGCAACCTCAAGCGTTTCTGGATCGGACTCAGTGATATAGAAGAAGAAGGTACTTGGACATGGGTAGATGGCACCGACTACAGTACATCATATCAGTTCTGGAGAGCCGGGGAGCCCAATGATGCA…
ENSXETG00000038630	SPATA4	-0.1080806282323416	spermatogenesis associated 4 [Source:NCBI gene;Acc:100488774]	ATGGTAACGGTTTCCAAGGCGCCCGTAACGCTGGCCGGCCCGCTGAAGGCGGAAATTAGTTGCTCCCTAGGGTCGATGGCGTGTTACCCGGAGGTGCCGCGTAGGACCGGGGTGCCCCGCGAAGTACTGAAATGGCTGCAGAGCTTGGACCTGAGTTTTTCCCCTAAAAATTTCCGCAGAGATTTCGCAAATGGATACCTTATAGCTGAGATATTCTACTGGTACTTTCCAGAAGACATCCAGCTGCATTCCTACGAGAATGGAACATCCCTAGCTAATAGATTGAGCAACTGGTCACAACTGGAGAAGTTCTTCATGAAAAGAAATCTGAAGGTTCCCAAAGCATTAATTGATGGTACCATTCACTGCAAACCAGAAGCAGCAGAATTAATCATTCAG…
ENSXETG00000027242	dock6	0.3163189969828798	dedicator of cytokinesis 6 [Source:Xenbase;Acc:XB-GENE-992620]	ATGCTTGCTCTTGCTCCCCCTGCTGGGGGCATCCTTCCTTCATTTCCCTACTTCTCGCCTATGCTTGCTCTTGCTCCCCCTGCTGAGGGCATCCTTCCTTCATTTCCCTACTTCTCGCCTACGCTTGCTCTTTCTCCCCCTGCTGGGGGCATCCTTCCTTCATTTCCCTACTTCTCGCCTACTCTTGCTCTTGCTCCCCCTGCTGGGGGCATCCTTCCTTCATTTCCCTACTTCTCCCCTACGCTTGCTCTTGCTCCCCCTGCTGGGGCATCTTTCCTTCATTTCCCTACTTCTCCCCTACGCTTGCTCTTGCTCCCCCTGCTGGGGCATCTTTCCTTCATTTCCCTACTTCTCCCCTACGCTTGCTCTTGCTCCCCCTGCTGGGGGCATCCTTCCTTC…
ENSXETG00000023501	xrn2	0.3802010511577356	5'-3' exoribonuclease 2 [Source:Xenbase;Acc:XB-GENE-993157]	ATGGGAGTCCCGGCGTTTTTCCGCTGGCTGAGCCGCAAATATCCCTCTATAATCGTGCACTCTGTGGAGGAGAAGCCCAAAGAATGCAATAACATCAAGATTCCTGTGGACACCACTAAACCAAATCCAAATGAAGTAGAGTTTGATAACCTTTATTTGGATATGAATGGCATTATCCATCCATGTACCCACCCAGAGGACAAGCCAGCACCAAAAAATGAAGATGAAATGATGGTTGCTATTTTTGAATACATTGATAGGCTCTTTAACATTGTGAGACCCAGGAGACTTCTTTACATGGCCATTGATGGCGTGGCCCCACGTGCTAAAATGAATCAGCAACGTTCTCGTAGATTTAGAGCATCCAAAGAAGGTGTTGAATCTTCAGAAGAGAAACAA…
ENSXETG00000033138	NA	-0.3119170887019473	urokinase plasminogen activator surface receptor-like [Source:NCBI gene;Acc:101731336]	ATGAAGCTTCCTCTCCTGTGCAGCATCGCCGGTGCCCTCCTGTCTGTAGTTTTCTCCCTAACCTGCTACCATTACAATGGGGCTGCCGATCACGCTCTGGGCCAGCAGAAGCTCACAGAATGCAAGAACAGCCAGCGCTACTGCAGCTCCTCTCTCATCACATACAGCGGCCAGCTGTACCTGAAGGTTCTAGTGAAGGGCTGCACTGACGATGAGGAGGGTGCCTGCAACAAAACTGCCACGGCCAACATGAAGGACCTCGAGAGCCAACACATCAAACTTTGCTGTGAAACAGATCTGTGCAACAAGGAACTGGAACCAGATTTGGGGCCCGATGCACAGAAGTGGGGTACTGAATGCCTGGCATGTAATGGACCTCCCACGGAATGCGGTGGGGGT…
ENSXETG00000012311	nfatc2	-0.04937560142489952	nuclear factor of activated T cells 2 [Source:Xenbase;Acc:XB-GENE-492278]	ATGGACCTGAGCTACGTGGACCGACTTCAGGACTCCATCCCACCGGAGGGGTGCAGCCAAGATACTGCCAGCCACGAAGTCGAGCTGAACTTTTCCGACCTCTTTGACTATGATACTGTTTATCCAGATGCTGCAGAAGAAGACACGAATCCTTCACATAAAACCATCAGCCCACCACCCGGAGTTGCGTATTCTCATGGCGAATTATTCATCAAGTCATACAGTACCCTGCCATACCATAGGGATGCCATGGGCACTTATGAACAGACAGATAGCTTAGGGTCCAAATACTGCTTCGACCCTCTGAAGGCTGCTGGGGCTTCAGCTTTGAGTCCAAGGATTGAGATCACTCCATCTCATGAACTCATTCAATCAGGTGGTCGCAGCAGAGAATCAGAT…
ENSXETG00000039201	cckar	-0.23816101772774728	NA	ATGAATTTAACATCTGCCAACAGTTTCATCCTTCTTGGCCTCACCAGTACCCCATACCTACAGGAATTATGTGTCCTTTTGATTTTAATAATGTATATAGTCACAATAGCTGGAAACTTGTTACTTATCATTGTGGTGGGGACCAGTGTTCAGCTGCAGACGCCCATGTACTTTTTCCTGTGCAACCTCTCCGTCATTGACATCTGCTTCTCCTCCACCATTGTGCCGAAACTCTTAATCAATACTTTAGCTCATGACAAAAGTATTTCTCTGTTTGGATGTGCTTCACAAATGTTCTTCCATTTAGCTCTAGGATGCACTGAGTGTATGATTCTGGCTGCCATGGCCTATGATAGGTACGCAGCCATCTGTCAACCTTTACACTACTACCAAATTATG…
ENSXETG00000032675	NA	0.21753706155063654	extracellular calcium-sensing receptor [Source:NCBI gene;Acc:100497060]	ATGCAGGGCAGTCCAGATAAGCTATTCTATACTGAAAAATATCAGTATACTCTTGCTCTGTTGTTTGCCATTAAGGAAATAAATAGAAACCCACTTTTATCCCCAAACGTGACACTGGGATATGAGGTTTACGACTCGTGCTATTCAGATGCAGCAGCTCTCGACAGTATCATGTCTTACCTATCTGGAAAGCAAACAAAGGTGCCGAATTACAGCTGTAATACAGCCCCCCCTAAACTATCTGCAGTGGTTGGGGACTCTCCATCATCTGGCTCGGTGGCTATTGCACGGATCCTCGGGCTGACTTTGTTTCCTCAGATCAGTTATGCTTCTGCACTTCCTACACTGGCAGATAAAACCCAGTTTCCTTCCTTTGTTCGTACCGTGGGCACTGTCGAC…
ENSXETG00000018653	ccdc185	0.12275634903977459	coiled-coil domain containing 185 [Source:NCBI gene;Acc:100498007]	ATGGAACGTAGTGGGCGCCGATCCCCCAACTTACACTTGGATCTGTATAACTTCCAGGAGGGCAATGACAGCCGCTATGTGCTCACCAGCCCCCGCTCCCTGGAGGCCTGTGCCCGGCTGGCCGTCAGACCCGTCGATCTCCTTCCCAGGTCAGTGGGGGAAGTGGCGGAGCAGCACCCGGGGGCCGGGCAGGGGCAGCTCAACCATCTGTGGGAGGAATACGAGGAGGAGCGAAGGAGCAGACTGAGGCTGTGCAAGCAGCTACGGGCACAGATAGTGCAGGGGGATCCCACAGCAGGAGGGCCCCATGGGGCCAAAGAACTAGAAATCCAGAATGATGGGGCCCTAGTGAAGCCCAGAGACTGGCCTACATATAAGGGGGGCACAGGTCACCCCATG…
ENSXETG00000013836	septin10	0.0132017634234248	septin 10 [Source:Xenbase;Acc:XB-GENE-1005816]	ATGTGTTTATTGGAATTTGTTTCCCCCAAGGTTTACCAATCAAATCTTGGAATGAGATCTCCCCAGAACAGCAATCCAGACATTCAAGATGCTCACAGACATAATGAAACTTCTAGGAGCTTGCCTTTATCTGGACACGTTGGATTTGACAGTTTACCTGACCAATTAGTTGAGAAATCAATTCGCCAGGGATTCTGTTTCAACATACTTTGCATTGGGGAAACTGGCATTGGAAAATCAACATTAATTAACACACTATTCAACACTAACTTTGAAGAACAGGAAACCAGCCATTTTGAGTCATCCGTAAAGCTAAAAGCACAAACCTATGACCTCAAGGAAAGCAAAGTTCATTTAAAATTGACTATTGTAAATACAGTTGGATTTGGAGATCAAATA…
ENSXETG00000034462	OAF	-0.2379260873114492	out at first homolog [Source:HGNC Symbol;Acc:HGNC:28752]	ATGACAGATCTCAGTACATCTGACTTGTACCTCCTCCGCCCTGGCACTTTCTGCCTGGTGATGTTTCCTCTGGCTGACTCCAGGAGGTTCTTGTGGCTGCTGATACCATTGCTTGGGTGCTGCTTGCCCTGCCTTGCTGACCTAAAGGTCCTTGTGCGCTTGGAGGACGGGCAGGTAACAGAAGAGAACCTTCAGGCGGACAGTGACAAAGATTTCATCACCTTAGAATTCCGAAAGACTGATGGGACGTTTGTAACTTACCTCGCAGATTTCAAGCAGGACGTGAAGATTTTCCGTGTTCTGATCCTTGGAGAGTTGGAGAGGGGACAGAGTCAGTTCCAGGCCCTGTGCTTTGTTACCCGGCTGCAGAGCAATGAAATCATTCCTAGTGAATCTATG…
ENSXETG00000032563	fktn	0.24417022611622005	phosphatidylinositol binding clathrin assembly protein [Source:NCBI gene;Acc:100327242]	ATGTCCGGCCAGAGCATCACCGACCGCATCACGGCGGCGCAGCACAGTGTGACCGGCTCGGCTGTCTCCAAGACCGTGTGTAAGGCCACCACCCACGAAATCATGGGCCCCAAGAAAAAGCACCTGGATTATTTAATTCAGTGCACCAATGAGATGAATGTAAACATCCCGCAGCTGGCGGATACGTTATTTGAGAGAACAACCAACAGTAGCTGGGTGGTAGTGTTCAAGTCCCTTATAACTACCCACCATCTCATGGTGTATGGAAACGAGCGTTTTATCCAGTATCTGGCATCAAGGAATACACTGTTTAACTTAAGCAATTTCCTGGACAAAAGTGGGCTGCAAGGATACGACATGTCTACGTTTATTAGGCGATACAGTCGGTACTTGAATGAA…
ENSXETG00000037404	NA	-0.26868750145607384	urokinase plasminogen activator surface receptor-like [Source:NCBI gene;Acc:101731406]	ATGCACAAGTGGCTGTCTCTCCTGATCCTCTGCTTCTTCCTACCTGTTGTGTTCTCCCTGAAATGTTACCAGTGCACCGGATTGCCCTATGACTGCCAGGAGACAGAGCAGCTTTGCCACATTAACCAGACCAGTTGTATGTCACAGGCGTTCACTGTAGTAGACAATGGGACTATTAAGGAATGGACATACAAGGGATGCTCTCAGGGACTTGTGTGCAATGAATCCGTATATTTGGACCGGGGCAGTATGAAGACTTATATCAGTTCCGCCTGCTGTTCCACAGACCTCTGCAATGTAGAAACCTACTATGCCCTTGTCCAAGTTGCTGGGCTCTACTGTCAGTCCTGTGAAGGGAGCAGTGATTCCTGTTCGTTGCAAAACCTGACAAGTGTCCAG…
[truncated: 16,626 more rows]
